# Supplementary material for: FXR1 regulates transcription and is required for growth of human cancer cells with TP53/FXR2 homozygous deletion
Source: eLife journal article supplement (doi:10.7554/elife.26129), 2017-08-02
Supplement: supp [file elife-26129-supp-v2.zip]

Archive with 46 entries (46 files):
- elife_poa_e26129_Figure_5_figure_supplement_2.pdf
- elife_poa_e26129_Figure_6_figure_supplement_3.pdf
- elife_poa_e26129_Figure_2_figure_supplement_3.pdf
- elife_poa_e26129_Figure_5_source_data.xls
- elife_poa_e26129_Figure_1_Figure_supplement_5_source_data.xls
- elife_poa_e26129_Figure_6_figure_supplement_1.pdf
- elife_poa_e26129_Supplementary_File_3.xlsx
- elife_poa_e26129_Figure_5_figure_supplement_3.pdf
- elife_poa_e26129_Figure_5_figure_supplement_1.pdf
- elife_poa_e26129_Figure_1_figure_supplement_3.pdf
- elife_poa_e26129_Figure_2_source_data.xls
- elife_poa_e26129_Figure_5_figure_supplement_5.pdf
- elife_poa_e26129_Supplementary_File_5.xlsx
- elife_poa_e26129_Figure_5_Figure_supplement_5_source_data.xls
- elife_poa_e26129_Table_1_source_data.xls
- elife_poa_e26129_Figure_1_figure_supplement_6.pdf
- elife_poa_e26129_Figure_4_figure_supplement_1.pdf
- elife_poa_e26129_Supplementary_File_1.xlsx
- elife_poa_e26129_Figure_2_Figure_supplement_2_source_data.xls
- elife_poa_e26129_Figure_5_Figure_supplement_6_source_data.xls
- elife_poa_e26129_Figure_5_figure_supplement_4.pdf
- elife_poa_e26129_Figure_3_source_data.xls
- elife_poa_e26129_Figure_1_Figure_supplement_2_source_data.xls
- elife_poa_e26129_Figure_1_figure_supplement_5.pdf
- elife_poa_e26129_Figure_1_figure_supplement_4.pdf
- elife_poa_e26129_Supplementary_File_6.xlsx
- elife_poa_e26129_Figure_1_source_data.xls
- elife_poa_e26129_Figure_2_Figure_supplement_3_source_data.xls
- elife_poa_e26129_Figure_5_Figure_supplement_4_source_data.xls
- elife_poa_e26129_Figure_1_Figure_supplement_3_source_data.xls
- elife_poa_e26129_Supplementary_File_4.xlsx
- elife_poa_e26129_Supplementary_File_2.xlsx
- elife_poa_e26129_Figure_6_figure_supplement_2.pdf
- elife_poa_e26129_Figure_2_figure_supplement_1.pdf
- elife_poa_e26129_Figure_1_figure_supplement_2.pdf
- elife_poa_e26129_Supplementary_File_7.xlsx
- elife_poa_e26129_Figure_6_Figure_supplement_2_source_data.xls
- elife_poa_e26129_Figure_6_Figure_supplement_1_source_data.xls
- elife_poa_e26129_Supplementary_table_8.xls
- elife_poa_e26129_Figure_6_source_data.xls
- elife_poa_e26129_Figure_1_Figure_supplement_6_source_data.xls
- elife_poa_e26129_Figure_2_figure_supplement_2.pdf
- elife_poa_e26129_Figure_5_Figure_supplement_3_source_data.xls
- elife_poa_e26129_Figure_5_figure_supplement_6.pdf
- elife_poa_e26129_Transparent_Reporting_File.pdf
- elife_poa_e26129_Figure_1_figure_supplement_1.pdf
