# Supplementary material for: FXR1 regulates transcription and is required for growth of human cancer cells with TP53/FXR2 homozygous deletion
Source: eLife journal article supplement (doi:10.7554/elife.26129), 2017-08-02
Supplement: supp [file elife-26129-supp-v2.zip › elife_poa_e26129_Figure_1_Figure_supplement_2_source_data.xls]

## Sheet: Sheet1
	TP53 mean	TP53 SD	FXR2 mean	FXR2 SD
HL-60	1.18132e-06	6.92718e-07	0.000623875	0.000215255
Kato III	9.7947e-06	1.20346e-06	0.000385218	9.85501e-05
KMs11	1.33136e-06	3.77535e-08	0.186469	0.0281586
H358	1.24762e-06	6.10348e-07	0.580002	0.179524
H1299	#DIV/0!	#DIV/0!	1.00189	0.0913042
HCT116	2.92672e-05	5.54033e-05	1.21053	0.325874
L540	0.0464981	0.0171396	1.61924	0.272141
MG63	3.00799e-05	1.04562e-05	0.535912	0.0812043
SKOV3	0.0454853	0.00980497	0.700495	0.0852874
Hep3B	2.0855	0.28698	0.0189848	0.00226957
A549	2.03557	0.998233	1.03429	0.196122
AGS	1	0.175023	1	0.0790815
HepG2	2.689	0.981161	0.722075	0.0600758
MKN45	3.32199	1.31178	2.09799	0.304587
