# Supplementary material for: FXR1 regulates transcription and is required for growth of human cancer cells with TP53/FXR2 homozygous deletion
Source: eLife journal article supplement (doi:10.7554/elife.26129), 2017-08-02
Supplement: supp [file elife-26129-supp-v2.zip › elife_poa_e26129_Figure_1_figure_supplement_3.pdf]

Fig 1-S3

A

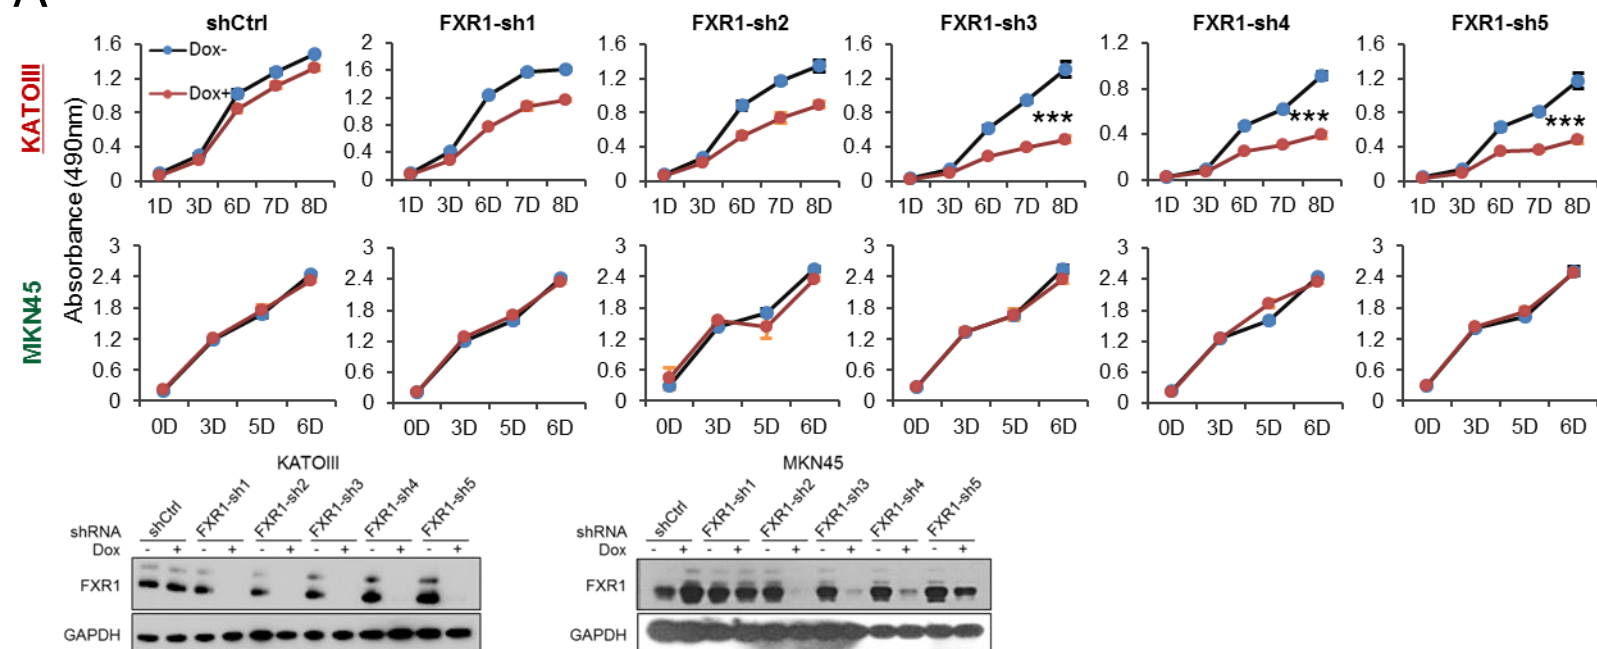

B

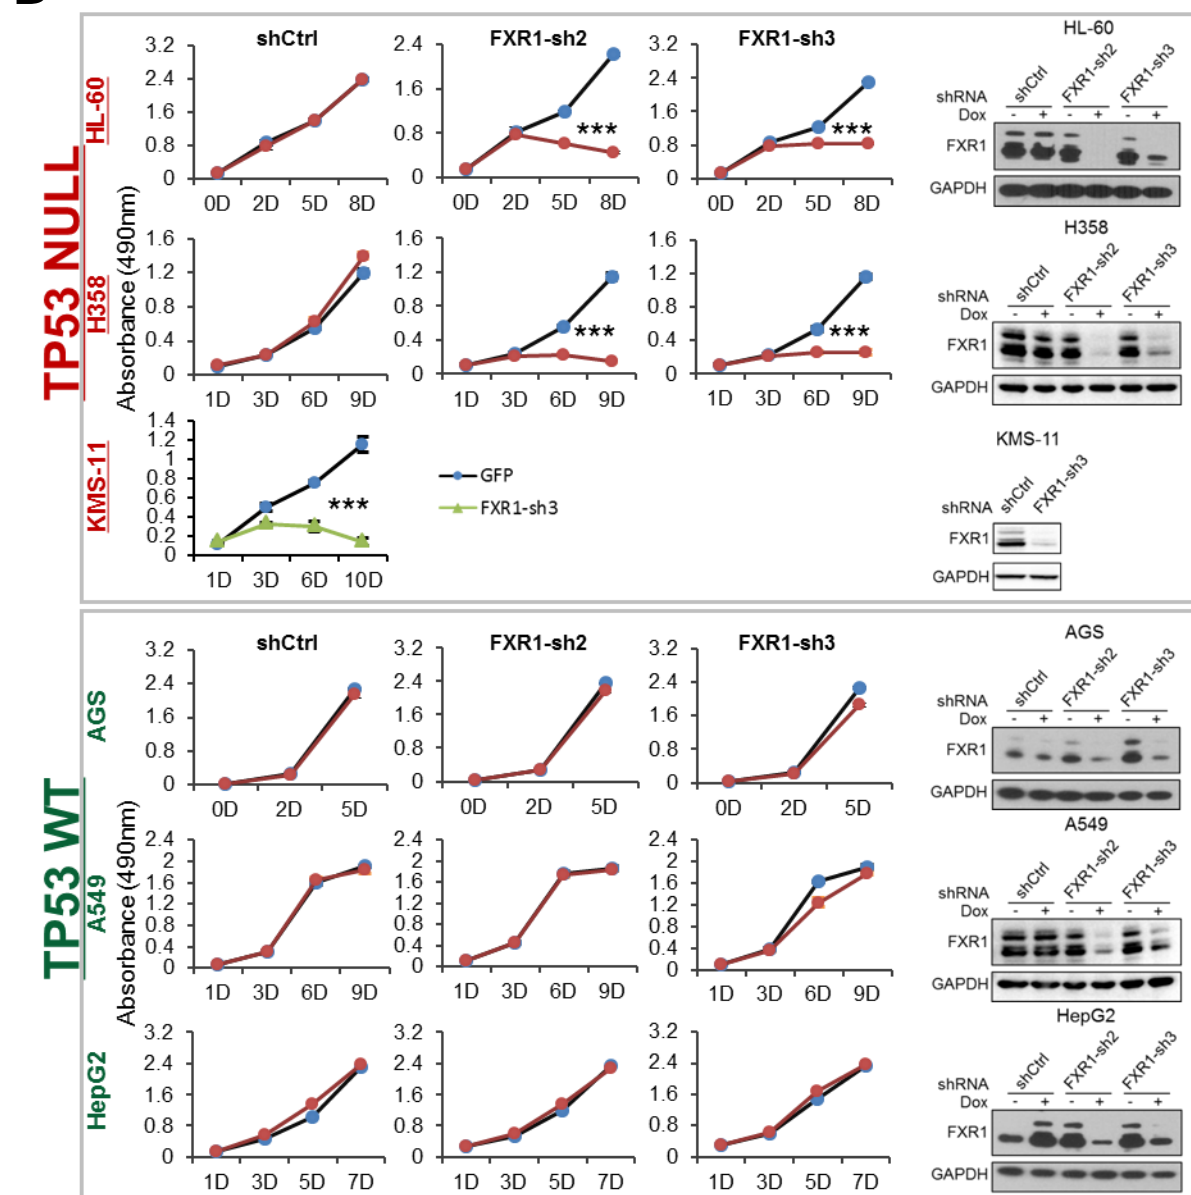

C

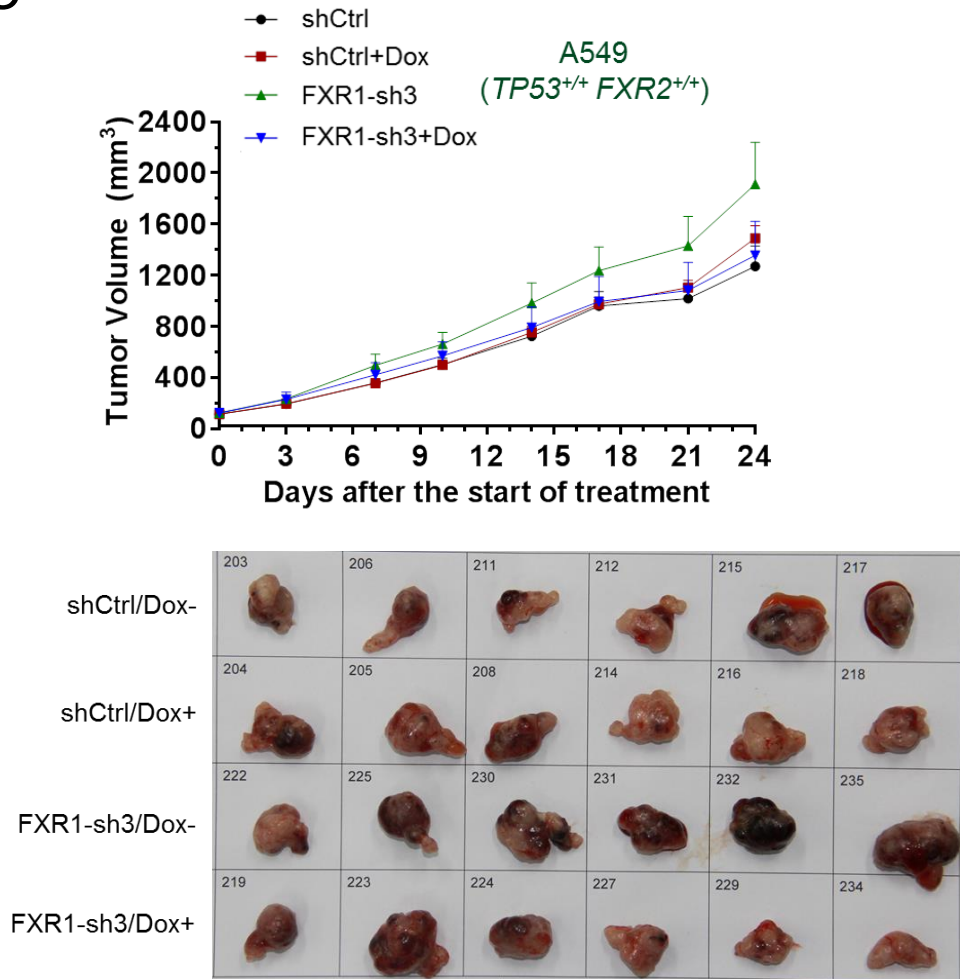

**Figure 1–Figure Supplement 3. FXR1 knockdown inhibits cell proliferation in *TP53* homozygous deletion cancers upon passenger deletion of *FXR2*.**

(A) Knockdown efficiency of five independent doxycycline (Dox)-inducible short hairpin RNA (shRNA) against FXR1 (FXR1-sh1-5) is tested by WB in KATOIII (*TP53*/*FXR2* co-deletion) or MKN45 (copy number normal) cells individually (lower panel). The stable cell lines are subjected to cell proliferation MTS assay upon Dox treatment (upper panel). Data represent the mean  $\pm$  s.d. of three independent experiments.

(B) Cell proliferation regulation by FXR1 inducible knockdown. Measurement of control shRNA (shCtrl)-, FXR1 shRNA (FXR1-sh2, FXR1-sh3)-induced anti-proliferation upon doxycycline (Dox) treatment at indicated days in *TP53*/*FXR2* deletion-containing cancer cell lines (HL-60, H358, KMS-11) and in the copy number normal cancer cell lines (AGS, A549, HepG2) in MTS assay. FXR1 knockdown in KMS-11 cells is induced by adenoviral shRNA. Data represent the mean  $\pm$  s.d. of three independent experiments.

(C) Tumor growth in cancer cell xenograft upon FXR1 knockdown. Upper, growth curves of xenograft tumors derived from subcutaneously implanted A549 cells stably expressing shCtrl or FXR1-sh3 upon Dox treatment. Tumor volume (mm<sup>3</sup>) represents the mean  $\pm$  s.e.m of six mice for each group at the indicated days with Dox treatment. Lower, the tumor sizes at the termination day.

The cell proliferation rate was determined by measuring absorbance at 490 nm in MTS assay (Y axis). \* $P < 0.05$ , \*\* $P < 0.01$ , \*\*\* $P < 0.001$ .
