# Supplementary material for: FXR1 regulates transcription and is required for growth of human cancer cells with TP53/FXR2 homozygous deletion
Source: eLife journal article supplement (doi:10.7554/elife.26129), 2017-08-02
Supplement: supp [file elife-26129-supp-v2.zip › elife_poa_e26129_Figure_1_Figure_supplement_3_source_data.xls]

## Sheet: Figure 1-S3A
KATOIII		Mean						SD
1D		C	sh1	sh2	sh3	sh4	sh5	C	sh1	sh2	sh3	sh4	sh5
Dox-		0.291	0.296	0.274	0.217	0.211	0.231
		0.274	0.293	0.271	0.227	0.215	0.24
		0.269	0.285	0.266	0.224	0.199	0.227
		0.095	0.108333	0.0873333	0.0396667	0.0253333	0.0496667	0.0094163	0.0046428	0.00329983	0.00418994	0.00679869	0.0054365
Dox+		0.252	0.266	0.252	0.214	0.209	0.217
		0.249	0.266	0.251	0.204	0.2	0.212
		0.258	0.266	0.259	0.208	0.208	0.214
		0.07	0.083	0.071	0.0256667	0.0226667	0.0313333	0.00374166	0	0.00355903	0.00410961	0.00402768	0.0020548
3D
Dox-		0.484	0.62	0.469	0.33	0.286	0.322
		0.494	0.583	0.455	0.314	0.26	0.32
		0.496	0.612	0.439	0.32	0.271	0.326
		0.308333	0.422	0.271333	0.138333	0.0893333	0.139667	0.00524934	0.0158955	0.0122565	0.00659966	0.0106562	0.00249444
Dox+		0.431	0.47	0.396	0.274	0.257	0.28
		0.424	0.469	0.392	0.274	0.244	0.28
		0.426	0.492	0.397	0.295	0.262	0.289
		0.244	0.294	0.212	0.098	0.0713333	0.1	0.00294392	0.0106145	0.00216025	0.00989949	0.00758654	0.00424264
6D
Dox-		1.203	1.411	1.129	0.783	0.649	0.768
		1.255	1.42	1.072	0.833	0.647	0.817
		1.154	1.419	0.994	0.785	0.673	0.847
		1.021	1.23367	0.882	0.617333	0.473333	0.627667	0.0412391	0.00402768	0.0553353	0.0231132	0.0118134	0.0325611
Dox+		0.958	0.967	0.674	0.466	0.435	0.542
		1.047	0.943	0.753	0.464	0.446	0.509
		1.069	0.976	0.729	0.468	0.418	0.545
		0.841667	0.779	0.535667	0.283	0.25	0.349	0.0479884	0.0139284	0.033069	0.00163299	0.0115181	0.0163095
7D
Dox-		1.496	1.776	1.378	1.164	0.809	1.042
		1.416	1.729	1.309	1.131	0.806	0.989
		1.459	1.754	1.368	1.078	0.796	0.975
		1.274	1.57	1.16867	0.941333	0.620667	0.819	0.0326905	0.0192007	0.0304448	0.0354244	0.00555778	0.028856
Dox+		1.307	1.334	0.853	0.57	0.486	0.552
		1.339	1.21	0.913	0.578	0.476	0.533
		1.265	1.224	1.009	0.572	0.493	0.573
		1.12067	1.073	0.742	0.390333	0.302	0.369667	0.0303022	0.0554497	0.0642495	0.00339935	0.00697615	0.0163367
8D
Dox-		1.672	1.804	1.618	1.45	1.135	1.489
		1.664	1.806	1.439	1.507	1.089	1.284
		1.672	1.772	1.529	1.497	1.055	1.314
		1.48633	1.611	1.34567	1.30167	0.91	1.17933	0.00377124	0.0155778	0.0730768	0.0248507	0.0327821	0.0904003
Dox+		1.474	1.365	1.02	0.683	0.54	0.693
			1.352	1.09	0.681	0.595	0.617
		1.542	1.327	1.108	0.654	0.593	0.678
		1.325	1.165	0.889667	0.489667	0.393	0.479667	0.034	0.0157692	0.037959	0.0132246	0.0254689	0.0328667
0.187
0.186
0.185
0.176
0.178
0.184	0.182667
MKN45
		Mean						SD
0D		C	sh1	sh2	sh3	sh4	sh5	C	sh1	sh2	sh3	sh4	sh5
Dox-		0.391	0.38	0.449	0.424	0.384	0.431
		0.351	0.38	0.442	0.42	0.39	0.475
		0.376	0.372	0.452	0.428	0.385	0.443
		0.192667	0.229333	0.299667	0.276	0.238333	0.301667	0.0164992	0.00377124	0.00418994	0.00326599	0.00262467	0.0185712
Dox+		0.373	0.379	0.454	0.426	0.365	0.456
		0.36	0.379	0.421	0.427	0.38	0.444
		0.365	0.375	0.888	0.395	0.376	0.413
		0.218	0.229667	0.439667	0.268	0.225667	0.289667	0.00535413	0.00188562	0.212795	0.0148549	0.0063421	0.0181169
3D
Dox-		1.358	1.387	1.594	1.486	1.421	1.587
		1.283	1.342	1.565	1.459	1.372	1.565
		1.337	1.36	1.598	1.48	1.43	1.529
		1.178	1.215	1.43767	1.327	1.25967	1.41233	0.0315911	0.0184932	0.0147045	0.0115758	0.0254864	0.0239072
Dox+		1.333	1.403	1.732	1.433	1.431	1.589
		1.338	1.493	1.71	1.471	1.419	1.598
		1.377	1.37	1.677	1.579	1.399	1.583
		1.20133	1.274	1.55833	1.34633	1.26833	1.442	0.0196695	0.0519808	0.0226029	0.0618457	0.0131993	0.00616441
5D
Dox-		1.872	1.767	1.953	1.849	1.775	1.848
		1.714	1.7	1.829	1.739	1.696	1.717
		1.921	1.777	1.806	1.85	1.792	1.808
		1.68767	1.6	1.71467	1.66467	1.60633	1.643	0.0883264	0.0341858	0.0645618	0.0520918	0.0418277	0.0548148
Dox+		1.844	1.86	1.615	1.741	2.069	1.877
		1.858	1.806	1.306	1.716	1.983	1.78
		2.027	1.925	1.799	1.968	2.162	1.98
		1.76167	1.71567	1.42533	1.66033	1.92333	1.731	0.0831638	0.0486507	0.203411	0.113362	0.0730951	0.0816619
6D
Dox-		2.579	2.542	2.711	2.619	2.564	2.625
		2.613	2.563	2.617	2.633	2.585	2.532
		2.543	2.595	2.699	2.775	2.593	2.745
		2.44633	2.43467	2.54367	2.54367	2.44867	2.502	0.0285813	0.0217919	0.0417719	0.0704714	0.0122293	0.0871894
Dox+		2.495	2.504	2.526	2.513	2.477	2.649
		2.469	2.499	2.496	2.51	2.461	2.622
		2.434	2.449	2.434	2.393	2.483	2.562
		2.334	2.352	2.35333	2.34	2.34167	2.479	0.0249933	0.0248328	0.0383087	0.0558749	0.00928559	0.0363593
0.177
0.171
0.189
0.18
0.179
0.179	0.179167

## Sheet: Figure 1-S3B
HL60
0D		C	sh2	sh3	SD	SD	SD
Dox-		0.279	0.284	0.285
		0.279	0.288	0.289
		0.277	0.289	0.282
	mean	0.146333	0.155	0.153333	0.0011547	0.00264575	0.00351188
Dox+		0.271	0.277	0.283
		0.287	0.294	0.282
		0.288	0.291	0.289
		0.15	0.155333	0.152667	0.00953939	0.00907377	0.00378594
2D
Dox-		1.066	1.026	1.055
		0.965	0.883	1.005
		1.09	1.05	1.051
	mean	0.866333	0.812333	0.863	0.066335	0.0902903	0.0277849
Dox+		1.074	0.98	0.973
		0.925	0.934	0.943
		0.876	0.9	0.947
		0.784333	0.764	0.780333	0.103123	0.0401497	0.0162891
5D
Dox-		1.563	1.337	1.393
		1.574	1.399	1.427
		1.575	1.372	1.441
	mean	1.38567	1.18433	1.23533	0.00665833	0.0310859	0.0246847
Dox+		1.538	0.805	1.014
		1.578	0.793	1.022
		1.636	0.786	1.03
	mean	1.399	0.609667	0.837	0.0492747	0.00960902	0.008
8D
Dox-		2.67	2.547	2.681
		2.737	2.616	2.663
		2.811	2.584	2.67
	mean	2.37533	2.21833	2.30733	0.070529	0.0345302	0.00907377
Dox+		2.722	0.795	1.212
		2.738	0.827	1.18
		2.775	0.827	1.223
	mean	2.381	0.452333	0.841	0.0271846	0.0184752	0.0223383
0.135		0.181		0.186		0.367
0.133		0.172		0.179		0.359
0.133		0.182		0.187		0.371
0.13		0.17		0.182		0.363
0.131		0.174		0.189		0.365
0.128		0.163		0.184		0.356
	0.131667		0.173667		0.1845		0.3635
	H358-FXR1-tet-NC										H358-FXR1-tet-sh2										H358-FXR1-tet-sh3
	Average				STDEV						Average				STDEV						Average				STDEV
	Day 1	Day 3	Day 6	Day 9	Day 1	Day 3	Day 6	Day 9			Day 1	Day 3	Day 6	Day 9	Day 1	Day 3	Day 6	Day 9			Day 1	Day 3	Day 6	Day 9	Day 1	Day 3	Day 6	Day 9
Dox-	0.1066	0.2398	0.554	1.2	0.00427785	0.00810555	0.0219613	0.0440023		Dox-	0.1044	0.2346	0.549	1.143	0.00427785	0.0128258	0.0125419	0.0487206		Dox-	0.1068	0.2292	0.5306	1.16005	0.00408656	0.00482701	0.0260711	0.0361421
Dox+	0.1114	0.2426	0.6246	1.402	0.00658027	0.0102713	0.0511341	0.0355837		Dox+	0.1026	0.2056	0.2244	0.1402	0.00270185	0.00543139	0.01251	0.0161338		Dox+	0.1036	0.2048	0.2582	0.25	0.00482701	0.00228035	0.0110318	0.0301778
AGS
0D		C	sh2	sh3	SD	SD	SD
Dox-		0.162	0.165	0.157
		0.158	0.157	0.152
		0.16	0.161	0.154
		0.026	0.027	0.0203333	0.002	0.004	0.00251661
Dox+		0.153	0.159	0.155
		0.164	0.166	0.159
		0.158	0.162	0.159
		0.0243333	0.0283333	0.0236667	0.00550757	0.00351188	0.0023094
2D
Dox-		0.476	0.487	0.427
		0.461	0.47	0.444
		0.485	0.477	0.457
		0.281	0.285	0.249667	0.0121244	0.008544	0.0150444
Dox+		0.434	0.443	0.415
		0.435	0.487	0.428
		0.44	0.468	0.422
		0.243333	0.273	0.228667	0.00321455	0.0220681	0.00650641
5D
Dox-		2.422	2.527	2.402
		2.47	2.514	2.465
		2.472	2.527	2.443
		2.27467	2.34267	2.25667	0.0283078	0.00750555	0.0319739
Dox+		2.399	2.341	1.981
		2.395	2.388	2.051
		2.235	2.303	2.076
		2.163	2.164	1.856	0.0935521	0.0425793	0.0492443
0.137		0.192		0.183
0.132		0.188		0.176
0.134		0.193		0.18
0.129		0.192		0.177
0.137		0.193		0.18
0.134		0.197		0.179
	0.133833		0.1925		0.179167
		A549-FXR1-tet-NC										A549-FXR1-tet-sh2										A549-FXR1-tet-sh3
		Average				STDEV						Average				STDEV						Average				STDEV
		Day 1	Day 3	Day 6	Day 9	Day 1	Day 3	Day 6	Day 9			Day 1	Day 3	Day 6	Day 9	Day 1	Day 3	Day 6	Day 9			Day 1	Day 3	Day 6	Day 9	Day 1	Day 3	Day 6	Day 9
	Dox-	0.0816	0.2414	1.344	1.9468	0.00454973	0.012276	0.0824427	0.048777		Dox-	0.0768	0.2822	1.5914	1.9428	0.00230217	0.0155403	0.0514752	0.044042		Dox-	0.08	0.3012	1.5472	1.9416	0.0045607	0.0246982	0.0323697	0.042371
	Dox+	0.083	0.2514	1.4176	1.807	0.00859069	0.0176833	0.0735017	0.086406		Dox+	0.076	0.2666	1.3378	1.83275	0.00472229	0.0157892	0.0597679	0.10277		Dox+	0.0832	0.2944	1.2874	1.5006	0.00414729	0.0287176	0.0774028	0.0997236
HepG2
1D		C	sh2	sh3
Dox-		0.43	0.452	0.444
		0.408	0.438	0.457
		0.407	0.453	0.467
		0.135	0.289667	0.298
Dox+		0.431	0.444	0.47
		0.426	0.437	0.46
		0.433	0.445	0.478
		0.15	0.284	0.311333
3D
Dox-		0.794	0.869	0.919
		0.777	0.856	0.9
		0.771	0.843	0.854
		0.474667	0.55	0.585
Dox+		0.87	0.922	0.967
		0.866	0.911	0.918
		0.842	0.888	0.914
		0.553333	0.601	0.627
5D
Dox-		1.331	1.465	1.7
		1.274	1.455	1.803
		1.269	1.506	1.806
		1.02133	1.20533	1.49967
Dox+		1.595	1.651	2.032
		1.588	1.62	1.94
		1.671	1.652	1.861
		1.348	1.371	1.67433
7D
Dox-		2.39	2.462	2.484
		2.476	2.408	2.425
		2.465	2.517	2.53
		2.31367	2.33233	2.34967
Dox+		2.537	2.404	2.526
		2.512	2.431	2.489
		2.503	2.358	2.454
		2.38733	2.26767	2.35967
0.327		0.351		0.288		0.157
0.28		0.3		0.271		0.129
0.256		0.298		0.27		0.131
0.285		0.294		0.263		0.126
0.287		0.303		0.275		0.129
0.272		0.295		0.276		0.13
	0.2845		0.306833		0.273833		0.133667

## Sheet: Figure 1-S3C
TV	Animal No.	0	3	7	10	14	17	21	24
Group 1	203	130	144	303	381	682	927	940	1053
Control with Sucrose 6%	206	102	202	382	551	720	833	996	999
	211	96	159	222	342	516	531	565	745
	212	118	223	397	581	697	1175	1239	1456
	215	133	239	458	651	1003	1320	1363	1723
	217	113	207	395	508	733	974	1011	1644
	AVG	115	196	359	502	725	960	1019	1270
	SEM	6	15	34	49	64	112	113	161
Group 2	204	124	205	358	468	729	969	1229	1413
Control with DOX 0.25 mg/ml	205	109	195	408	552	857	1049	1212	1689
	208	89	152	277	340	552	749	851	1079
	214	140	239	408	503	749	1104	1106	1753
	216	115	220	366	556	784	910	1066	1439
	218	113	167	329	576	857	1070	1162	1568
	AVG	115	196	358	499	755	975	1104	1490
	SEM	7	13	20	36	46	54	57	99
Group 3	222	128	192	385	445	583	774	830	988
Target with Sucrose 6%	225	99	146	314	474	600	917	1029	1505
	230	129	313	590	662	1089	1330	1817	2444
	231	97	169	248	531	787	901	905	1110
	232	126	252	724	1011	1483	1953	1979	2695
	235	166	334	723	856	1357	1545	2021	2735
	AVG	124	234	497	663	983	1237	1430	1913
	SEM	10	32	86	93	158	187	231	328
Group 4	219	81	122	238	326	581	662	680	1116
Target with DOX 0.25 mg/ml	223	180	474	798	962	1509	1795	2033	2376
	224	127	247	459	681	885	1213	1275	1905
	227	153	280	565	762	834	1122	1144	1208
	229	106	148	263	379	492	563	730	841
	234	98	117	216	312	451	613	641	695
	AVG	124	231	423	570	792	995	1084	1357
	SEM	15	56	94	110	161	196	218	266
