# Supplementary material for: FXR1 regulates transcription and is required for growth of human cancer cells with TP53/FXR2 homozygous deletion
Source: eLife journal article supplement (doi:10.7554/elife.26129), 2017-08-02
Supplement: supp [file elife-26129-supp-v2.zip › elife_poa_e26129_Figure_1_Figure_supplement_5_source_data.xls]

## Sheet: Sheet1
FXR1-HL60-RESCUE
1D		sh2-vector	sh2-FXR1-V1		SD	SD
Dox-		0.191	0.205
		0.186	0.202
		0.192	0.204
		0.0443333	0.0583333		0.00321455	0.00152753
Dox+		0.195	0.211
		0.192	0.203
		0.195	0.204
		0.0486667	0.0606667		0.00173205	0.0043589
3D
Dox-		0.279	0.38
		0.282	0.349
		0.28	0.368
		0.210167	0.2955		0.00152753	0.0156312
Dox+		0.222	0.32
		0.227	0.318
		0.245	0.351
		0.161167	0.2595		0.0120968	0.0185023
5D
Dox-		0.562	0.799
		0.513	0.72
		0.529	0.702
		0.4635	0.669167		0.0249867	0.0515978
Dox+		0.345	0.587
		0.331	0.588
		0.334	0.626
		0.2655	0.529167		0.00737111	0.0222336
7D
Dox-		1.146	1.313
		1.083	1.249
		1.059	1.276
		0.941667	1.125		0.0449333	0.0321299
Dox+		0.687	1.11
		0.604	1.048
		0.671	1.073
		0.499667	0.922667		0.0440341	0.0311929
p-value
0.146		0.072		0.072		0.152
0.144		0.068		0.068		0.151
0.148		0.072		0.073		0.153
0.144		0.069		0.07		0.15
0.146		0.071		0.074		0.154
0.144		0.069		0.07		0.166
	0.145333		0.0701667		0.0711667		0.154333
FXR1-HL60-RESCUE
1D		sh3-vector	sh3-FXR1-V1		SD	SD	SD
Dox-		0.208	0.224
		0.202	0.231
		0.203	0.221
		0.059	0.08		0.00321455	0.0051316
Dox+		0.208	0.231
		0.205	0.223
		0.207	0.225
		0.0613333	0.081		0.00152753	0.00416333
3D
Dox-		0.394	0.489
		0.362	0.458
		0.35	0.455
		0.2985	0.397167		0.022745	0.0188237
Dox+		0.263	0.414
		0.258	0.387
		0.278	0.401
		0.196167	0.3305		0.0104083	0.0135031
5D
Dox-		0.656	0.904
		0.657	0.926
		0.737	1.035
		0.612167	0.883833		0.0464794	0.0701498
Dox+		0.318	0.722
		0.321	0.672
		0.325	0.721
		0.250167	0.633833		0.00351188	0.0285832
7D
Dox-		1.195	1.478
		1.124	1.416
		1.127	1.407
		0.994333	1.27933		0.0401539	0.0386566
Dox+		0.434	1.399
		0.403	1.344
		0.446	1.369
		0.273333	1.21633		0.0221886	0.0275379
p-value
0.146		0.072		0.072		0.152
0.144		0.068		0.068		0.151
0.148		0.072		0.073		0.153
0.144		0.069		0.07		0.15
0.146		0.071		0.074		0.154
0.144		0.069		0.07		0.166
	0.145333		0.0701667		0.0711667		0.154333
