# Supplementary material for: FXR1 regulates transcription and is required for growth of human cancer cells with TP53/FXR2 homozygous deletion
Source: eLife journal article supplement (doi:10.7554/elife.26129), 2017-08-02
Supplement: supp [file elife-26129-supp-v2.zip › elife_poa_e26129_Figure_1_Figure_supplement_6_source_data.xls]

## Sheet: Sheet1
	1	2	3	4	5	6	7	8	9	10	11	12
A	0.029	0.029	0.031	0.171	0.16	0.159	0.158	0.159	0.16	0.03	0.03	0.029	490
B	0.029	0.029	0.028	0.322	0.454	0.311	2.062	2.136	2.316	0.03	0.029	0.029	490
C	0.029	0.029	0.029	0.304	0.432	0.301	1.97	2.255	2.136	0.03	0.03	0.029	490
D	0.029	0.029	0.029	0.314	0.444	0.304	2.037	2.241	2.171	0.031	0.029	0.03	490
E	0.028	0.029	0.028	0.028	0.035	0.028	0.027	0.028	0.027	0.028	0.028	0.028	490
F	0.029	0.029	0.028	0.027	0.029	0.028	0.028	0.029	0.028	0.028	0.028	0.028	490
G	0.028	0.029	0.029	0.024	0.029	0.028	0.028	0.028	0.026	0.029	0.029	0.029	490
H	0.029	0.029	0.029	0.169	0.17	0.17	0.17	0.172	0.17	0.03	0.031	0.03	490
				AGS			H358
			Sample	siCtrl	FMR1-si1	FMR1-si3	siCtrl	FMR1-si1	FMR1-si3
			Average	0.313333	0.443333	0.305333	2.023	2.21067	2.20767
			SD	0.0090185	0.0110151	0.0051316	0.047571	0.065041	0.0954376
			siCtrl	0.313333	0.0090185	siCtrl	2.023	0.047571
			FMR1-si1	0.443333	0.0110151	FMR1-si1	2.21067	0.065041
			FMR1-si3	0.305333	0.0051316	FMR1-si3	2.20767	0.0954376
