# Supplementary material for: FXR1 regulates transcription and is required for growth of human cancer cells with TP53/FXR2 homozygous deletion
Source: eLife journal article supplement (doi:10.7554/elife.26129), 2017-08-02
Supplement: supp [file elife-26129-supp-v2.zip › elife_poa_e26129_Figure_1_source_data.xls]

## Sheet: Figure 1C
HL60
Days	0D	2D	5D	8D
Ctrl-	0.146333	0.866333	1.38567	2.37533
SD	0.0011547	0.066335	0.00665833	0.070529
Ctrl+	0.15	0.784333	1.399	2.381
SD	0.00953939	0.103123	0.0492747	0.0271846
Sh2-	0.155	0.812333	1.18433	2.21833
SD	0.00264575	0.0902903	0.0310859	0.0345302
sh2+	0.155333	0.764	0.609667	0.452333
SD	0.00907377	0.0401497	0.00960902	0.0184752
Sh3-	0.153333	0.863	1.23533	2.30733
SD	0.00351188	0.0277849	0.0246847	0.00907377
sh3+	0.152667	0.780333	0.837	0.841
SD	0.00378594	0.0162891	0.008	0.0223383
H358
Days	1D	3D	6D	9D
Ctrl-	0.1066	0.2398	0.554	1.2
SD	0.00427785	0.00810555	0.0219613	0.0440023
Ctrl+	0.1114	0.2426	0.6246	1.402
SD	0.00658027	0.0102713	0.0511341	0.0355837
Sh2-	0.1044	0.2346	0.549	1.143
SD	0.00427785	0.0128258	0.0125419	0.0487206
sh2+	0.1026	0.2056	0.2244	0.1402
SD	0.00270185	0.00543139	0.01251	0.0161338
Sh3-	0.1068	0.2292	0.5306	1.16005
SD	0.00408656	0.00482701	0.0260711	0.0361421
sh3+	0.1036	0.2048	0.2582	0.25
SD	0.00482701	0.00228035	0.0110318	0.0301778
AGS
Days	0D	2D	5D
Ctrl-	0.026	0.281	2.27467
SD	0.002	0.0121244	0.0283078
Ctrl+	0.0243333	0.243333	2.163
SD	0.00550757	0.00321455	0.0935521
Sh2-	0.027	0.285	2.34267
SD	0.004	0.008544	0.00750555
sh2+	0.0283333	0.273	2.164
SD	0.00351188	0.0220681	0.0425793
Sh3-	0.0203333	0.249667	2.25667
SD	0.00251661	0.0150444	0.0319739
sh3+	0.0236667	0.228667	1.856
SD	0.0023094	0.00650641	0.0492443
MKN45
Days	0D	3D	5D	6D
Ctrl-	0.192667	1.178	1.68767	2.44633
SD	0.0164992	0.0315911	0.0883264	0.0285813
Ctrl+	0.218	1.20133	1.76167	2.334
SD	0.00535413	0.0196695	0.0831638	0.0249933
Sh2-	0.299667	1.43767	1.71467	2.54367
SD	0.00418994	0.0147045	0.0645618	0.0417719
sh2+	0.439667	1.55833	1.42533	2.35333
SD	0.212795	0.0226029	0.203411	0.0383087
Sh3-	0.276	1.327	1.66467	2.54367
SD	0.00326599	0.0115758	0.0520918	0.0704714
sh3+	0.268	1.34633	1.66033	2.34
SD	0.0148549	0.0618457	0.113362	0.0558749

## Sheet: Figure 1D
KatoIII_FXR1-tet-sh3_GFP Vector		Average					STDEV
		D1	D3	D6	D9		D1	D3	D6	D9
Vector-1.5	Dox-	0.0876667	0.272333	0.851333	1.54967		0.00152753	0.0057735	0.0373229	0.0358097
	Dox+	0.0746667	0.234333	0.296	0.219		0.011547	0.0318957	0.0210079	0.0216333
KatoIII_FXR1-tet-sh3_FXR1-V1-M		Average					STDEV
		D1	D3	D6	D9		D1	D3	D6	D9
FXR1-V1-M-1.5	Dox-	0.167333	0.474	1.186	1.72633		0.00360555	0.0144222	0.0142945	0.0496421
	Dox+	0.150333	0.407333	0.798333	1.405		0.002	0.00665833	0.0277308	0.0869713
KatoIII_FXR1-tet-sh3_FXR2		Average					STDEV
		D1	D3	D6	D9		D1	D3	D6	D9
FXR2-1.5	Dox-	0.095	0.277333	0.889667	1.748		0.00251661	0.00896289	0.0657292	0.008544
	Dox+	0.088	0.25	0.562	0.905333		0.00650641	0.0157162	0.040501	0.0795383

## Sheet: Figure 1E
Day1	FXR1-sh3/vector	FXR1-sh3/FMR1
4	6	7	9
0.059	0.06	0.059	0.059
0.133	0.235	0.165	0.128	Dox-
0.126	0.234	0.166	0.127
0.126	0.232	0.165	0.128
0.128	0.25	0.172	0.128	Dox+
0.125	0.243	0.176	0.128
0.126	0.256	0.178	0.126
0.419	0.54	0.285	0.164
Day3
4	6	7	9
0.058	0.059	0.059	0.057
0.124	0.405	0.174	0.06	Dox-
0.129	0.377	0.185	0.06
0.12	0.387	0.174	0.06
0.123	0.402	0.175	0.061	Dox+
0.121	0.376	0.182	0.06
0.122	0.402	0.177	0.061
0.134	0.129	0.126	0.062
Day6
4	6	7	9
0.059	0.06	0.06	0.059
0.16	0.887	0.769	0.061	Dox-
0.157	0.86	0.804	0.06
0.159	0.847	0.784	0.061
0.158	0.39	0.306	0.06	Dox+
0.157	0.389	0.307	0.059
0.159	0.403	0.312	0.061
0.063	0.063	0.063	0.063

## Sheet: Figure 1F
H1299
0D		H1299-Ctrl	H1299-sh3		SD	SD
Dox-		0.133	0.133
		0.126	0.13
		0.126	0.128
		0.00633333	0.00833333		0.00404145	0.00251661
Dox+		0.128	0.13
		0.126	0.127
		0.127	0.13
		0.005	0.007		0.001	0.00173205
3D		H1299-Ctrl	H1299-sh3		SD	SD
Dox-		0.249	0.29
		0.227	0.269
		0.255	0.266
		0.0845	0.115833		0.0147422	0.0130767
Dox+		0.257	0.273
		0.252	0.273
		0.232	0.236
		0.0878333	0.1015		0.0132288	0.021362
5D
Dox-		0.511	0.464
		0.435	0.569
		0.497	0.584
		0.324833	0.382833		0.0404475	0.0653835
Dox+		0.548	0.532
		0.445	0.47
		0.45	0.466
		0.324833	0.333167		0.0580775	0.0370045
7D
Dox-		1.119	1.235
		0.972	1.269
		1.162	1.316
		0.916	1.105		0.099631	0.0406735
Dox+		0.908	0.96
		0.998	0.94
		1.003	1.139
		0.801333	0.844667		0.0534634	0.109576
9D
Dox-		1.26	1.38
		1.17	1.378
		1.349	1.391
		1.08467	1.208		0.0895005	0.007
Dox+		1.333	1.518
		1.288	1.393
		1.36	1.502
		1.152	1.296		0.0363731	0.0680221
0.125		0.16		0.156		0.169		0.18
0.122		0.16		0.15		0.165		0.172
0.12		0.159		0.152		0.167		0.173
0.123		0.161		0.158		0.17		0.176
0.12		0.157		0.166		0.171		0.173
0.122		0.158		0.155		0.168		0.176
	0.122		0.159167		0.156167		0.168333		0.175
L540
1D		L540-Ctrl	L540-FXR1-sh3		SD	SD
Dox-		0.132	0.132
		0.124	0.128
		0.129	0.127
		0.0116667	0.0123333		0.00404145	0.00264575
Dox+		0.124	0.125
		0.131	0.138
		0.133	0.132
		0.0126667	0.015		0.00472582	0.00650641
5D
Dox-		0.58	0.473
		0.57	0.481
		0.579	0.464
		0.470167	0.3665		0.00550757	0.0085049
Dox+		0.447	0.488
		0.432	0.381
		0.465	0.408
		0.341833	0.3195		0.0165227	0.0556447
7D
Dox-		1.4	1.202
		1.308	1.138
		1.291	1.043
		1.21583	1.0105		0.058643	0.0800021
Dox+		1.106	1.07
		1.253	1.012
		1.117	1.041
		1.0415	0.923833		0.08188	0.029
0.117		0.111		0.12
0.116		0.105		0.116
0.116		0.107		0.118
0.117		0.107		0.117
0.115		0.103		0.116
0.119		0.104		0.116
	0.116667		0.106167		0.117167
MG63
1D		MG63-Ctrl	MG63-FXR1-sh3		SD	SD
Dox-		0.236	0.244
		0.236	0.239
		0.211	0.213
		0.111	0.115333		0.0144338	0.0166433
Dox+		0.219	0.217
		0.214	0.211
		0.21	0.218
		0.0976667	0.0986667		0.00450925	0.00378594
5D
Dox-		0.377	0.426
		0.377	0.388
		0.378	0.412
		0.271167	0.3025		0.00057735	0.019218
Dox+		0.34	0.389
		0.378	0.387
		0.335	0.4
		0.244833	0.285833		0.023516	0.007
7D
Dox-		0.892	1.255
		1.118	1.232
		0.996	1.383
		0.884833	1.17283		0.113119	0.0813572
Dox+		0.88	1.259
		0.999	1.253
		0.983	1.324
		0.836833	1.1615		0.0645833	0.0393743
0.117		0.111		0.12
0.116		0.105		0.116
0.116		0.107		0.118
0.117		0.107		0.117
0.115		0.103		0.116
0.119		0.104		0.116
	0.116667		0.106167		0.117167
SKOV3
0D		SKOV3-Ctrl	SKOV3-FXR1-sh3		SD	SD
Dox-		0.204	0.206
		0.201	0.205
		0.213	0.197
		0.0836667	0.0803333		0.006245	0.00493288
Dox+		0.201	0.203
		0.219	0.19
		0.205	0.203
		0.086	0.0763333		0.00945163	0.00750555
3D
Dox-		0.416	0.393
		0.382	0.332
		0.271	0.367
		0.249333	0.257		0.075831	0.0306105
Dox+		0.34	0.296
		0.335	0.296
		0.318	0.352
		0.224	0.207667		0.0115326	0.0323316
5D
Dox-		0.494	0.634
		0.694	0.66
		0.662	0.652
		0.508667	0.540667		0.107431	0.0133167
Dox+		0.536	0.484
		0.701	0.557
		0.587	0.45
		0.5	0.389		0.0844808	0.0546717
7D
Dox-		0.998	0.981
		1.116	0.967
		1.093	0.973
		1.069	0.973667		0.062554	0.00702377
Dox+		0.809	0.961
		1.028	0.876
		0.855	0.827
		0.897333	0.888		0.115474	0.0678012
0.123		0.108		0.111		0.138
0.129		0.106		0.111		0.125
0.119		0.105		0.108		0.119
0.123		0.108		0.104		0.124
0.118		0.106		0.105		0.122
0.122		0.109		0.109		0.128
	0.122333		0.107		0.108		0.126
Hep3B
1D		C	sh2	sh3
Dox-		0.364	0.376	0.379
		0.353	0.363	0.366
		0.358	0.367	0.362
		0.0783333	0.210667	0.211	0.00550757	0.00665833	0.00888819
Dox+		0.364	0.378	0.383
		0.35	0.356	0.368
		0.372	0.366	0.374
		0.082	0.208667	0.217	0.0111355	0.0110151	0.00754983
3D
Dox-		0.685	0.663	0.66
		0.625	0.654	0.65
		0.655	0.647	0.669
		0.349	0.348667	0.353667	0.03	0.00802081	0.00950438
Dox+		0.666	0.688	0.682
		0.664	0.658	0.658
		0.662	0.672	0.649
		0.358	0.366667	0.357	0.002	0.0150111	0.0170587
5D
Dox-		1.471	1.428
		1.533	1.52	1.446
		1.568	1.453	1.476
		1.244	1.187	1.181	0.0491223	0.047571	0.0212132
Dox+		1.454	1.507	1.468
		1.563	1.518	1.464
		1.556	1.514	1.454
		1.24433	1.233	1.182	0.0610109	0.00556776	0.0072111
7D
Dox-		1.939	1.838	1.904
		1.987	1.995	2.019
		2.049	2.05	2.031
		1.70167	1.671	1.69467	0.0551483	0.110014	0.0701166
Dox+		1.979	2.031	1.949
		1.973	1.966	1.983
		1.892	1.921	1.932
		1.658	1.68267	1.66467	0.0485901	0.0553022	0.0259679
0.291		0.358		0.319		0.224
0.242		0.296		0.27		0.349
0.32		0.298		0.273		0.304
0.253		0.293		0.267		0.294
0.291		0.296		0.294		0.309
0.283		0.3		0.27		0.298
	0.28		0.306833		0.282167		0.296333

## Sheet: Figure 1G
HL60-in vivo
Tumor Volume (mm3)
TV	Animal No.	0	3	7	10	14	17	20
Group 1 Control without DOX	919	176.047	407.688	541.697	1178.83	1339.09	1876.28	2260.88
	920	106.696	282.097	519.126	1048.12	1200.49	1335.13	1953.36
	926	107.715	238.817	470.691	839.297	998.247	1306.83	1815.7
	930	197.775	586.991	761.635	1220.88	1605.6	2105.8	2250.39
	931	129.799	324.513	537.237	913.196	1522.15	1903.74	2007.1
	933	172.98	220.398	453.33	624.36	811.025	1062.06	1691.47
	AVG	148.502	343.417	547.286	970.78	1246.1	1598.31	1996.48
	SEM	15.8606	55.8723	45.3009	91.7289	124.752	170.283	93.4635
Group 2 Control with DOX	921	145.423	206.56	223.559	486.564	593.639	910.088	1117.78
	923	84.1501	233.924	305.183	494.119	525.083	685.37	813.614
	925	135.629	292.378	564.972	933.368	1011.58	1423.05	1792.06
	927	119.79	270.24	426.089	548.783	960.324	1470.12	2041.78
	932	197.634	318.902	470.45	894.936	1340.71	1655.54	2724.27
	934	193.535	418.391	494.949	1154.84	1020.79	1156.82	1504.87
	AVG	146.027	290.066	414.2	752.102	908.688	1216.83	1665.73
	SEM	17.838	30.4534	51.8931	114.581	123.676	150.476	278.694
Group 3 Target without DOX	902	250.678	538.136	626.719	1079.62	1500.32	2047.43	3060.4
	909	173.417	461.994	501.696	905.148	1001.81	1263.33	1628.29
	910	335.792	704.22	535.245	724.74	573.881	838.02	1107.17
	913	131.555	413.95	723.099	1088.45	1890.22	1544.75	2653.45
	917	166.046	241.274	228.012	551.947	504.236	866.495	1194.62
	918	209.686	461.477	638.398	1163.93	1646.29	2226.97	2645.16
	AVG	211.195	470.175	542.195	918.973	1186.13	1464.5	2048.18
	SEM	29.9409	61.9395	70.5986	97.8365	236.644	239.316	343.4
Group 4 Target with DOX	901	154.321	166.186	81.7852	26.8967	23.7808	10.5137	0
	903	268.516	289.12	132.67	62.6284	15.6501	0	0
	906	186.106	215.749	70.2775	20.9103	16.2267	0	0
	912	214.842	209.858	116.292	26.8461	14.3646	0	0
	914	339.732	374.575	305.032	470.92	443.927	503.814	980.12
	915	73.8922	88.7811	72.8336	36.6776	28.6707	29.4295	0
	AVG	206.235	224.045	129.815	107.48	90.4367	90.6261	163.353
	SEM	37.5896	40.3353	36.5105	72.9391	70.7344	82.77	163.353
