# Supplementary material for: FXR1 regulates transcription and is required for growth of human cancer cells with TP53/FXR2 homozygous deletion
Source: eLife journal article supplement (doi:10.7554/elife.26129), 2017-08-02
Supplement: supp [file elife-26129-supp-v2.zip › elife_poa_e26129_Figure_2_Figure_supplement_2_source_data.xls]

## Sheet: CRISPR
DAY 1
0.067	0.063	0.063	no dox
0.071	0.08	0.075
0.067	0.069	0.079
0.07	0.072	0.066	with dox
0.078	0.084	0.079
0.063	0.065	0.068
Clone16-ctrl	16c +siRNA-1	16c +siRNA-2
0.094	0.074	0.076	no dox
0.066	0.086	0.064
0.074	0.085	0.079
0.071	0.067	0.069	with dox
0.071	0.068	0.069
0.066	0.069	0.07
Clone16-FXR1 KD	16F +siRNA-1	16F +siRNA-2
DAY 5
0.748	1.317	1.531	no dox
0.6879	1.632	1.816
0.7606	1.545	1.003
0.701	1.163	1.214	with dox
0.753	1.05	0.902
0.684	0.918	1.3262
Clone16-ctrl	16c +siRNA-1	16c +siRNA-2
0.503	1.109	1.368
0.901	1.603	1.362
0.674	1.256	1.267	no dox
0.564	0.408	0.512
0.527	0.406	0.556
0.346	0.48	0.511	with dox
Clone16-FXR1 KD	16F +siRNA-1	16F +siRNA-2
