# Supplementary material for: FXR1 regulates transcription and is required for growth of human cancer cells with TP53/FXR2 homozygous deletion
Source: eLife journal article supplement (doi:10.7554/elife.26129), 2017-08-02
Supplement: supp [file elife-26129-supp-v2.zip › elife_poa_e26129_Figure_2_Figure_supplement_3_source_data.xls]

## Sheet: Sheet1
D0		AGS-3-6-1 (GFP)-clone 9
		FXR2-Tet-on-ctrl	FXR2-tet-sh2	FXR2-tet-sh3									AGS-3-6-1 (GFP)-clone 9												AGS-3-6-1 (GFP)-clone 9												AGS-3-6-1 (GFP)-clone 9
Average	Dox-	0.030875	0.031875	0.036875									0D	3D	6D	8D		0D	3D	6D	8D				0D	3D	6D	8D		0D	3D	6D	8D				0D	3D	6D	8D		0D	3D	6D	8D
	Dox+	0.034625	0.033375	0.047625							FXR2-ctrl	Dox-	0.030875	0.1105	0.756125	1.33625		0.00443471	0.0156418	0.0474342	0.0292005		FXR2-sh2	Dox-	0.031875	0.129	0.844625	1.30325		0.00675771	0.00834666	0.0449333	0.0223308		FXR2-sh3	Dox-	0.036875	0.142	1.02146	1.48325		0.00420317	0.0340049	0.108039	0.0637129
STDEV	Dox-	0.00443471	0.00675771	0.00420317								Dox+	0.034625	0.10125	0.764625	1.31825		0.00403113	0.0298147	0.0520609	0.0446841			Dox+	0.033375	0.12225	0.533125	0.92		0.00496655	0.00877021	0.0380351	0.0726745			Dox+	0.047625	0.09875	0.235875	0.27125		0.00394757	0.0144539	0.0295	0.0373809
	Dox+	0.00403113	0.00496655	0.00394757
D3		AGS-3-6-1 (GFP)-clone 9
		FXR2-Tet-on-ctrl	FXR2-tet-sh2	FXR2-tet-sh3
Average	Dox-	0.1105	0.129	0.142
	Dox+	0.10125	0.12225	0.09875
STDEV	Dox-	0.0156418	0.00834666	0.0340049
	Dox+	0.0298147	0.00877021	0.0144539
D6		AGS-3-6-1 (GFP)-clone 9
		FXR2-Tet-on-ctrl	FXR2-tet-sh2	FXR2-tet-sh3
Average	Dox-	0.756125	0.844625	1.02146
	Dox+	0.764625	0.533125	0.235875
STDEV	Dox-	0.0474342	0.0449333	0.108039
	Dox+	0.0520609	0.0380351	0.0295
D8		AGS-3-6-1 (GFP)-clone 9
		FXR2-Tet-on-ctrl	FXR2-tet-sh2	FXR2-tet-sh3
Average	Dox-	1.33625	1.30325	1.48325
	Dox+	1.31825	0.92	0.27125
STDEV	Dox-	0.0292005	0.0223308	0.0637129
	Dox+	0.0446841	0.0726745	0.0373809
