# Supplementary material for: FXR1 regulates transcription and is required for growth of human cancer cells with TP53/FXR2 homozygous deletion
Source: eLife journal article supplement (doi:10.7554/elife.26129), 2017-08-02
Supplement: supp [file elife-26129-supp-v2.zip › elife_poa_e26129_Figure_2_source_data.xls]

## Sheet: Figure 2B
AGS-DKO1
0D		Ctrl	FXR1-sh3		SD	SD
Dox-		0.079	0.078
		0.078	0.079
		0.078	0.08
		0.0518333	0.0525		0.00057735	0.001
Dox+		0.079	0.079
		0.078	0.077
		0.075	0.081
		0.0508333	0.0525		0.00208167	0.002
3D
Dox-		0.422	0.376
		0.398	0.389
		0.379	0.409
		0.340667	0.332333		0.0215484	0.0166233
Dox+		0.395	0.395
		0.341	0.432
		0.376	0.338
		0.311667	0.329333		0.0273922	0.0473533
5D
Dox-		1.169	1.284
		1.131	1.276
		1.266	1.237
		1.158	1.235		0.0696156	0.0251462
Dox+		1.058	0.94
		1.276	1.143
		1.046	0.915
		1.096	0.968667		0.129466	0.125045
7D
Dox-		1.381	1.508
		1.498	1.553
		1.454	1.669
		1.44376	1.57609		0.059096	0.0830682
Dox+		1.55	1.596
		1.383	1.545
		1.46442	1.56842		0.118087	0.0360624
0.027		0.058		0.031		0.028
0.027		0.061		0.031		0.027
0.027		0.058		0.031		0.027
0.027		0.059		0.032		0.027
0.023		0.059		0.031		0.028
0.028		0.059		0.028		0.028
	0.0265		0.059		0.0306667		0.0275
AGS-DKO5
0D		Ctrl	FXR1-sh3		SD	SD
Dox-		0.078	0.079
		0.078	0.078
		0.079	0.078
		0.0518333	0.0518333		0.00057735	0.00057735
Dox+		0.079	0.078
		0.076	0.077
		0.075	0.078
		0.0501667	0.0511667		0.00208167	0.00057735
3D
Dox-		0.372	0.366
		0.419	0.379
		0.383	0.389
		0.332333	0.319		0.0245832	0.0115326
Dox+		0.394	0.41
		0.403	0.382
		0.357	0.333
		0.325667	0.316		0.024379	0.0389744
5D
Dox-		1.09	1.176
		1.285	1.267
		1.289	1.252
		1.19067	1.201		0.113756	0.0487887
Dox+		1.214	1.193
		1.157	1.114
		1.15483	1.12283		0.0403051	0.0558614
7D
Dox-		1.49	1.451
		1.613	1.618
		1.613	1.633
		1.572	1.56733		0.0710141	0.101026
Dox+		1.62	1.555
		1.557	1.528
		1.5885	1.5415		0.0445477	0.0190919
0.027		0.058		0.031		0.028
0.027		0.061		0.031		0.027
0.027		0.058		0.031		0.027
0.027		0.059		0.032		0.027
0.023		0.059		0.031		0.028
0.028		0.059		0.028		0.028
	0.0265		0.059		0.0306667		0.0275
AGS-DKO11
0D		Ctrl	FXR1-sh3		SD	SD
Dox-		0.077	0.078
		0.078	0.077
		0.077	0.078
		0.0508333	0.0511667		0.00057735	0.00057735
Dox+		0.078	0.078
		0.077	0.077
		0.077	0.077
		0.0508333	0.0508333		0.00057735	0.00057735
3D
Dox-		0.324	0.364
		0.384	0.415
		0.384	0.396
		0.305	0.332667		0.034641	0.0257747
Dox+		0.364	0.43
		0.357	0.402
		0.283	0.376
		0.275667	0.343667		0.0448813	0.0270062
5D
Dox-		1.101	1.302
		1.291	1.128
		1.31
		1.20333	1.18433		0.115572	0.123037
Dox+		1.037	0.529
		1.215	0.622
		1.022	0.609
		1.06067	0.556		0.107361	0.050362
7D
Dox-		1.388	1.479
		1.618	1.61
		1.573	1.557
		1.52633	1.54867		0.121895	0.0658964
Dox+		1.603	0.826
		1.503	0.737
		1.431	0.726
		1.51118	0.761845		0.086379	0.0548361
0.027		0.058		0.031		0.028
0.027		0.061		0.031		0.027
0.027		0.058		0.031		0.027
0.027		0.059		0.032		0.027
0.023		0.059		0.031		0.028
0.028		0.059		0.028		0.028
	0.0265		0.059		0.0306667		0.0275
AGS-DKOL7
0D		Ctrl	FXR1-sh3		SD	SD
Dox-		0.078	0.078
		0.078	0.078
		0.078	0.078
		0.0515	0.0515		0	0
Dox+		0.079	0.079
		0.077	0.078
		0.077	0.078
		0.0511667	0.0518333		0.0011547	0.00057735
3D
Dox-		0.377	0.357
		0.419	0.38
		0.381	0.431
		0.333333	0.330333		0.0231805	0.0378726
Dox+		0.341	0.285
		0.377	0.351
		0.299	0.303
		0.28	0.254		0.0390384	0.0341174
5D
Dox-		1.075	1.039
		1.226	1.283
		1.105	1.048
		1.10467	1.09267		0.0799396	0.138349
Dox+		1.081	0.818
		1.042
		0.903	0.732
		0.978	0.744333		0.0935646	0.0608112
7D
Dox-
		1.603	1.429
		1.602	1.382
		1.6025	1.4055		0.000707107	0.033234
Dox+		1.575	0.727
		1.52	0.74
			0.696
		1.5475	0.721		0.0388909	0.0226053
0.027		0.058		0.031		0.028
0.027		0.061		0.031		0.027
0.027		0.058		0.031		0.027
0.027		0.059		0.032		0.027
0.023		0.059		0.031		0.028
0.028		0.059		0.028		0.028
	0.0265		0.059		0.0306667		0.0275

## Sheet: Figure 2C
AGS-TP53-3-3
0D		Ctrl	FXR1-sh3		SD	SD
Dox-	TP53-KO-WT	0.13	0.132
		0.129	0.126
		0.13	0.129
		0.00516667	0.0045		0.00057735	0.003
Dox+		0.136	0.131
		0.13	0.13
		0.134	0.135
		0.00883333	0.0075		0.00305505	0.00264575
3D		Ctrl	FXR1-sh3		SD	SD
Dox-		0.19	0.163
		0.172	0.149
		0.183	0.17
		0.0748333	0.0538333		0.00907377	0.0106927
Dox+		0.166	0.155
		0.191	0.173
		0.171	0.168
		0.0691667	0.0585		0.0132288	0.00929157
5D
Dox-		1.135	1.194
		1.181	1.189
		1.129	1.174
		1.0425	1.07983		0.0284488	0.0104083
Dox+		1.223	1.197
		1.189	1.145
		1.201	1.032
		1.0985	1.01883		0.0172434	0.0843584
7D
Dox-		2.009	1.809
		2.23	1.935
		2.192	1.783
		2.0335	1.73217		0.118162	0.0812978
Dox+		1.962	1.815
		1.96	1.774
		1.938	1.725
		1.84317	1.66117		0.0133167	0.0450592
0.125		0.106		0.105		0.113
0.123		0.107		0.106		0.109
0.122		0.106		0.102		0.111
0.127		0.107		0.109		0.109
0.122		0.109		0.105		0.11
0.128		0.106		0.108		0.109
	0.1245		0.106833		0.105833		0.110167
AGS-TP53-3-10
0D		Ctrl	FXR1-sh3		SD	SD
Dox-		0.082	0.081
		0.081	0.08
		0.081	0.08
		0.0561667	0.0551667		0.00057735	0.00057735
Dox+		0.08	0.079
		0.079	0.079
		0.087	0.077
		0.0568333	0.0531667		0.0043589	0.0011547
3D
Dox-		0.349	0.398
		0.401	0.418
		0.378	0.372
		0.234833	0.254833		0.0260576	0.0230651
Dox+		0.388	0.37
		0.335	0.369
		0.351	0.295
		0.216833	0.2035		0.0271846	0.0430155
5D
Dox-		1.099	1.265
		1.153	1.156
		1.066	1.062
		1.0825	1.1375		0.0439204	0.101592
Dox+		1.263	1.142
		1.042	1.13
		1.062	1.008
		1.09883	1.06983		0.122231	0.074144
7D
Dox-		1.564	1.52
		1.691	1.661
		1.634	1.646
		1.62967	1.609		0.0636108	0.0774403
Dox+		1.631	1.712
		1.636	1.623
		1.517
		1.59467	1.6675		0.0673078	0.0629325
0.027		0.142		0.024		0.028
0.025		0.14		0.023		0.026
0.027		0.139		0.023		0.025
0.025		0.141		0.024		0.028
0.024		0.142		0.024		0.027
0.023		0.143		0.023		0.031
	0.0251667		0.141167		0.0235		0.0275
AGS-TP53-3-6-1
0D		Ctrl	FXR1-sh3		SD	SD
Dox-		0.083	0.083
		0.083	0.083
		0.083	0.083
		0.0578333	0.0578333		0	0
Dox+		0.083	0.083
		0.082	0.082
		0.078	0.077
		0.0558333	0.0555		0.00264575	0.00321455
3D
Dox-		0.32	0.327
		0.389	0.365
		0.347	0.398
		0.210833	0.222167		0.0347707	0.0355293
Dox+		0.407	0.173
		0.336	0.202
		0.359	0.177
		0.226167	0.0428333		0.0362261	0.0157162
5D
Dox-		1.198	1.096
		1.196	1.153
		1.252	1.131
		1.19183	1.10317		0.03177	0.028746
Dox+		1.087	0.614
		1.038	0.603
		1.039	0.585		0.0346482	0.00777817
7D
Dox-		1.578	1.574
		1.638	1.604
		1.634	1.638
		1.61609	1.60476		0.033546	0.0320208
Dox+		1.709	1.089
		1.53	1.081
		1.543	0.939
		1.593	1.03533		0.0998048	0.084388
0.027		0.142		0.024		0.028
0.025		0.14		0.023		0.026
0.027		0.139		0.023		0.025
0.025		0.141		0.024		0.028
0.024		0.142		0.024		0.027
0.023		0.143		0.023		0.031
	0.0251667		0.141167		0.0235		0.0275
AGS-TP53-3-6-2
0D		Ctrl	FXR1-sh3		SD	SD
Dox-		0.084	0.087
		0.083	0.084
		0.083	0.082
		0.0581667	0.0591667		0.00057735	0.00251661
Dox+		0.083	0.101
		0.082	0.087
		0.084	0.091
		0.0578333	0.0678333		0.001	0.0072111
3D
Dox-		0.368	0.35
		0.366	0.378
		0.364	0.411
		0.224833	0.2385		0.002	0.0305341
Dox+		0.343	0.388
		0.393	0.411
		0.329	0.311
		0.213833	0.228833		0.0336452	0.0523737
5D
Dox-		1.109	1.112
		1.178	1.227
		1.074	1.221
		1.09683	1.16317		0.0529182	0.0647328
Dox+		1.273	1.166
		1.146	1.119
		1.134	1.111
		1.16083	1.1085		0.0770216	0.0297153
7D
Dox-		1.614	1.608
		1.646	1.603
		1.656	1.651
		1.63867	1.62067		0.0219393	0.0263881
Dox+		1.634	1.681
		1.624	1.635
		1.417	1.567
		1.55833	1.62767		0.1225	0.0573527
0.027		0.142		0.024		0.028
0.025		0.14		0.023		0.026
0.027		0.139		0.023		0.025
0.025		0.141		0.024		0.028
0.024		0.142		0.024		0.027
0.023		0.143		0.023		0.031
	0.0251667		0.141167		0.0235		0.0275
AGS-TP53-3-14-6
0D	Clone3-14-6	Ctrl	FXR1-sh3		SD	SD
Dox-	TP53-KO-KO	0.133	0.146
		0.129	0.151
		0.128	0.153
		0.0055	0.0255		0.00264575	0.00360555
Dox+		0.136	0.15
		0.132	0.14
		0.138	0.152
		0.0108333	0.0228333		0.00305505	0.0064291
3D
Dox-		0.147	0.231
		0.123	0.274
		0.114	0.246
		0.0211667	0.1435		0.0170587	0.0218251
Dox+		0.128	0.273
		0.135	0.239
		0.117	0.213
		0.0198333	0.134833		0.00907377	0.0300888
5D
Dox-		0.461	0.774
		0.475	0.789
		0.574	0.753
		0.3975	0.666167		0.0615982	0.0180831
Dox+		0.496	0.639
		0.527	0.635
		0.57	0.629
		0.425167	0.5285		0.0371618	0.00503322
7D
Dox-		1.244	1.272
		1.334	1.309
		1.348	1.28
		1.1985	1.17683		0.0564388	0.0194679
Dox+		1.347	1.201
		1.16	1.096
		1.313	1.017
		1.16317	0.9945		0.0996109	0.0923057
0.125		0.106		0.105		0.113
0.123		0.107		0.106		0.109
0.122		0.106		0.102		0.111
0.127		0.107		0.109		0.109
0.122		0.109		0.105		0.11
0.128		0.106		0.108		0.109
	0.1245		0.106833		0.105833		0.110167

## Sheet: Figure 2D
clone5
Day0
	1	2	3	4	5	6	7	8	9	10	11	12
A	0.043												490
B	0.14	0.157	0.15	0.164	0.163	0.144	0.146	0.147	0.149	0.148	0.142		490
C	0.138	0.151	0.147	0.16	0.16	0.149	0.151	0.152	0.148	0.146	0.153		490
D	0.144	0.158	0.154	0.165	0.166	0.154	0.155	0.154	0.155	0.151	0.153		490
E	0.143	0.159	0.157	0.168	0.168	0.161	0.155	0.16	0.157	0.158	0.158		490
F	0.152	0.171	0.163	0.174	0.18	0.167	0.163	0.16	0.16	0.158	0.161		490
G	0.148	0.166	0.162	0.173	0.194	0.165	0.151	0.162	0.166	0.173	0.17		490
H	0.053												490
	0.144167
		ags f2 ko clone5
	no dox	0.013	0.006	0.02	0.019	0	0.002	0.003	0.005	0.004	-0.002
		0.007	0.003	0.016	0.016	0.005	0.007	0.008	0.004	0.002	0.009
		0.014	0.01	0.021	0.022	0.01	0.011	0.01	0.011	0.007	0.009
	with dox	0.015	0.013	0.024	0.024	0.017	0.011	0.016	0.013	0.014	0.014
		0.027	0.019	0.03	0.036	0.023	0.019	0.016	0.016	0.014	0.017
		0.022	0.018	0.029	0.05	0.021	0.007	0.018	0.022	0.029	0.026
		ctrl	fxr1-sh3
		0.0113333	0.00633333	0.019	0.019	0.005	0.00666667	0.007	0.00666667	0.00433333	0.00533333
		0.00309121	0.00286744	0.00216025	0.00244949	0.00408248	0.00368179	0.00294392	0.00309121	0.0020548	0.00518545
		0.0213333	0.0166667	0.0276667	0.0366667	0.0203333	0.0123333	0.0166667	0.017	0.019	0.019
		0.00492161	0.00262467	0.00262467	0.0106249	0.00249444	0.00498888	0.000942809	0.00374166	0.00707107	0.00509902
Day3
	1	2	3	4	5	6	7	8	9	10	11	12
A	0.049	0.139	0.146	0.148	0.14	0.141	0.141	0.143	0.138	0.139	0.14	0.049	490
B	0.052	0.298	0.31	0.457	0.436	0.283	0.294	0.317	0.314	0.267	0.316	0.049	490
C	0.052	0.301	0.31	0.479	0.478	0.273	0.325	0.273	0.28	0.278	0.274	0.051	490
D	0.054	0.321	0.351	0.414	0.426	0.258	0.282	0.303	0.272	0.266	0.28	0.05	490
E	0.052	0.291	0.273	0.407	0.4	0.297	0.26	0.307	0.255	0.298	0.256	0.053	490
F	0.054	0.35	0.272	0.389	0.354	0.293	0.247	0.305	0.265	0.28	0.24	0.053	490
G	0.053	0.281	0.337	0.429	0.477	0.284	0.261	0.298	0.285	0.277	0.272	0.054	490
H	0.052	0.055	0.056	0.056	0.056	0.055	0.058	0.055	0.059	0.059	0.057	0.052	490
		f2-ko clone5
		0.159	0.171	0.318	0.297	0.144	0.155	0.178	0.175	0.128	0.177	0
		0.162	0.171	0.34	0.339	0.134	0.186	0.134	0.141	0.139	0.135	0.002
		0.182	0.212	0.275	0.287	0.119	0.143	0.164	0.133	0.127	0.141	-0.001
		0.152	0.134	0.268	0.261	0.158	0.121	0.168	0.116	0.159	0.117	0.003
		0.211	0.133	0.25	0.215	0.154	0.108	0.166	0.126	0.141	0.101	0
		0.142	0.198	0.29	0.338	0.145	0.122	0.159	0.146	0.138	0.133	0.001
		ctrl	f3
		0.167667	0.184667	0.311	0.307667	0.132333	0.161333	0.158667	0.149667	0.131333	0.151	0.000333333
		0.168333	0.155	0.269333	0.271333	0.152333	0.117	0.164333	0.129333	0.146	0.117	0.00133333
Day6
	1	2	3	4	5	6	7	8	9	10	11	12
A	0.042	0.141	0.141	0.139	0.139	0.144	0.139	0.133	0.134	0.113	0.105	0.041	490
B	0.046	1.589	1.638	1.696	1.076	1.501	1.561	1.639	1.556	1.769	1.572	0.04	490
C	0.048	1.611	1.49	1.712	1.493	1.192	1.56	1.655	1.725	1.829	1.704	0.039	490
D	0.05	1.636	1.673	1.756	1.778	1.399	1.354	1.591	1.627	1.681	1.615	0.038	490
E	0.045	1.437	1.561	1.633	0.957	0.978	0.62	1.49	0.64	1.525	0.921	0.039	490
F	0.046	1.425	1.56	1.628	1.099	1.093	0.509	1.419	0.735	1.275	0.706	0.039	490
G	0.046	1.181	1.354	1.722	1.349	1.051	0.46	1.368	0.987	1.321	0.846	0.039	490
H	0.04	0.046	0.047	0.05	0.047	0.047	0.047	0.051	0.053	0.046	0.04	0.04	490
		f2-clone5
	no dox	1.456	1.505	1.563	0.943	1.368	1.428	1.506	1.423	1.636	1.439
		1.478	1.357	1.579	1.36	1.059	1.427	1.522	1.592	1.696	1.571
		1.503	1.54	1.623	1.645	1.266	1.221	1.458	1.494	1.548	1.482
	with dox	1.304	1.428	1.5	0.824	0.845	0.487	1.357	0.507	1.392	0.788
		1.292	1.427	1.495	0.966	0.96	0.376	1.286	0.602	1.142	0.573
		1.048	1.221	1.589	1.216	0.918	0.327	1.235	0.854	1.188	0.713
		ctrl	fxr1-sh3
		1.479	1.46733	1.58833	1.316	1.231	1.35867	1.49533	1.503	1.62667	1.49733
		0.0192007	0.0793151	0.0253684	0.288274	0.128553	0.0973459	0.0271948	0.0692868	0.0607801	0.0549687
		1.298	1.3245	1.528	1.002	0.907667	0.396667	1.29267	0.654333	1.24067	0.691333
		0.122	0.0973459	0.0431818	0.162045	0.0475137	0.0669345	0.0500289	0.146416	0.108644	0.0891004
Day9
	1	2	3	4	5	6	7	8	9	10	11	12
A	0.043	0.157	0.134	0.139	0.14	0.143	0.152	0.145	0.145	0.035	0.049	0.049	490
B	0.052	1.864	1.826	1.891	1.932	0.755	0.739	0.726	0.929	0.04	0.048	0.049	490
C	0.051	1.594	1.577	1.924	1.956	0.762	0.806	0.746	0.709	0.043	0.049	0.049	490
D	0.053	1.929	1.75	1.819	1.682	0.785	0.789	0.71	0.719	0.044	0.049	0.049	490
E	0.049	1.695	1.367	2.008	1.817	1.663	1.441	1.665	1.659	0.052	0.052	0.051	490
F	0.052	1.382	1.664	1.656	1.775	1.892	1.607	1.601	1.972	0.055	0.051	0.052	490
G	0.045	1.849	1.558	1.958	1.754	1.691	1.218	1.513	1.521	0.052	0.054	0.053	490
H	0.043	0.045	0.05	0.05	0.055	0.049	0.052	0.055	0.053	0.046	0.052	0.053	490
		f2-ko clone5
	no dox	1.72	1.682	1.747	1.788	0.611	0.595	0.582	0.785
		1.45	1.433	1.78	1.812	0.618	0.662	0.602	0.565
		1.785	1.606	1.675	1.538	0.641	0.645	0.566	0.575
	with dox	1.551	1.223	1.864	1.673	1.519	1.297	1.521	1.515
		1.238	1.52	1.512	1.631	1.748	1.463	1.457	1.828
		1.705	1.414	1.814	1.61	1.547	1.074	1.369	1.377
		ctrl	f3
		1.65167	1.57367	1.734	1.71267	0.623333	0.634	0.583333	0.641667
		0.145048	0.104193	0.0438406	0.123896	0.0128149	0.0284371	0.0147271	0.101434
		1.498	1.38567	1.73	1.638	1.60467	1.278	1.449	1.57333
		0.1943	0.122894	0.155495	0.0261916	0.101995	0.159376	0.062311	0.188684
clone10,11, 16,17
Day0
	1	2	3	4	5	6	7	8	9	10	11	12
A	0.043												490
B	0.14	0.157	0.15	0.164	0.163	0.144	0.146	0.147	0.149	0.148	0.142		490
C	0.138	0.151	0.147	0.16	0.16	0.149	0.151	0.152	0.148	0.146	0.153		490
D	0.144	0.158	0.154	0.165	0.166	0.154	0.155	0.154	0.155	0.151	0.153		490
E	0.143	0.159	0.157	0.168	0.168	0.161	0.155	0.16	0.157	0.158	0.158		490
F	0.152	0.171	0.163	0.174	0.18	0.167	0.163	0.16	0.16	0.158	0.161		490
G	0.148	0.166	0.162	0.173	0.194	0.165	0.151	0.162	0.166	0.173	0.17		490
H	0.053												490
	0.144167
	no dox	0.013	0.006	0.02	0.019	0	0.002	0.003	0.005	0.004	-0.002
		0.007	0.003	0.016	0.016	0.005	0.007	0.008	0.004	0.002	0.009
		0.014	0.01	0.021	0.022	0.01	0.011	0.01	0.011	0.007	0.009
	with dox	0.015	0.013	0.024	0.024	0.017	0.011	0.016	0.013	0.014	0.014
		0.027	0.019	0.03	0.036	0.023	0.019	0.016	0.016	0.014	0.017
		0.022	0.018	0.029	0.05	0.021	0.007	0.018	0.022	0.029	0.026
		ags f2 ko-8		ags f2 ko-10		ags f2 ko-11		ags f2 ko-16		ags f2 ko-17
		0.0113333	0.00633333	0.019	0.019	0.005	0.00666667	0.007	0.00666667	0.00433333	0.00533333
		0.00309121	0.00286744	0.00216025	0.00244949	0.00408248	0.00368179	0.00294392	0.00309121	0.0020548	0.00518545
		0.0213333	0.0166667	0.0276667	0.0366667	0.0203333	0.0123333	0.0166667	0.017	0.019	0.019
		0.00492161	0.00262467	0.00262467	0.0106249	0.00249444	0.00498888	0.000942809	0.00374166	0.00707107	0.00509902
Day3
	1	2	3	4	5	6	7	8	9	10	11	12
A	0.05	0.131	0.128	0.128	0.127	0.126	0.126	0.125	0.125	0.051	0.049	0.049	490
B	0.059	1.247	1.498	1.005	1.148	1.271	1.165	1.57	1.215	1.92	1.871	0.049	490
C	0.052	1.323	1.444	0.836	1.083	1.048	0.911	1.394	1.324	1.75	1.81	0.053	490
D	0.069	1.442	1.422	0.694	1.114	1.121	1.029	1.302	1.284	1.796	1.823	0.051	490
E	0.06	1.715	1.394	0.723	0.912	0.985	1.243	1.331	1.116	1.452	1.751	0.063	490
F	0.074	1.866	1.436	0.931	0.883	1.072	1.313	1.25	1.137	1.469	1.601	0.057	490
G	0.066	1.91	1.501	1.054	0.803	1.397	1.023	1.147	1.171	1.585	1.564	0.065	490
H	0.066	0.092	0.094	0.089	0.09	0.088	0.087	0.088	0.086	0.058	0.054	0.058	490
		ags f2 ko-8		ags f2 ko-10		ags f2 ko-11		ags f2 ko-16		ags f2 ko-17
	no dox	1.121	1.372	0.879	1.022	1.145	1.039	1.444	1.089
		1.197	1.318	0.71	0.957	0.922	0.785	1.268	1.198
		1.316	1.296	0.568	0.988	0.995	0.903	1.176	1.158
	with dox	1.589	1.268	0.597	0.786	0.859	1.117	1.205	0.99
		1.74	1.31	0.805	0.757	0.946	1.187	1.124	1.011
		1.784	1.375	0.928	0.677	1.271	0.897	1.021	1.045
		1.159	1.32867	0.719	1.005	1.02067	0.909	1.296	1.178
		0.038	0.0319305	0.127125	0.017	0.0928308	0.103782	0.111188	0.02
		1.762	1.31767	0.8665	0.7715	1.02533	1.067	1.11667	1.01533
		0.022	0.0440177	0.104	0.0145	0.177306	0.123558	0.0752965	0.0226618
		Ctrl	Fxr1-sh3	Ctrl	Fxr1-sh3	Ctrl	Fxr1-sh3	Ctrl	Fxr1-sh3
Day5
	1	2	3	4	5	6	7	8	9	10	11	12
A	0.04	0.146	0.222	0.148	0.083	0.143	0.13	0.076	0.099	0.087	0.096	0.04	490
B	0.042	1.548	0.868	1.7584	1.963	1.971	1.998	2.124	2.105	2.062	1.842	0.041	490
C	0.043	1.443	1.361	1.7294	1.913	1.84	1.884	1.983	2.121	2.099	2.035	0.044	490
D	0.045	1.656	1.594	1.7757	1.929	2.018	1.992	2.181	1.945	2.235	2.252	0.045	490
E	0.047	1.612	1.335	1.831	1.428	2.047	1.771	2.169	1.829	2.299	1.88	0.042	490
F	0.047	1.682	1.107	1.792	1.352	2.139	1.642	2.258	1.707	2.305	1.982	0.044	490
G	0.04	1.645	1.142	1.765	1.329	2	1.822	2.011	1.885	2.212	2.15	0.042	490
H	0.039	0.042	0.048	0.047	0.045	0.044	0.044	0.046	0.046	0.046	0.044	0.041	490
	no dox	1.402	0.722	1.6124	1.817	1.825	1.852	1.978	1.959	1.916	1.696
		1.297	1.215	1.5834	1.767	1.694	1.738	1.837	1.975	1.953	1.889
		1.51	1.448	1.6297	1.783	1.872	1.846	2.035	1.799	2.089	2.106
	with dox	1.466	1.189	1.685	1.282	1.901	1.625	2.023	1.683	2.153	1.734
		1.536	0.961	1.646	1.206	1.993	1.496	2.112	1.561	2.159	1.836
		1.499	0.996	1.619	1.183	1.854	1.676	1.865	1.739	2.066	2.004
		ags f2 ko-8		ags f2 ko-10		ags f2 ko-11		ags f2 ko-16		ags f2 ko-17
		1.403	1.12833	1.6085	1.789	1.797	1.812	1.95	1.911	1.986	1.897
		0.0869598	0.302657	0.019102	0.0208487	0.0753171	0.0523832	0.0832226	0.0794649	0.0743819	0.167477
		1.50033	1.04867	1.65	1.22367	1.916	1.599	2	1.661	2.126	1.858
		0.0285929	0.100254	0.0270924	0.0423031	0.0577293	0.0757496	0.10214	0.0743146	0.0424971	0.111319
