# Supplementary material for: FXR1 regulates transcription and is required for growth of human cancer cells with TP53/FXR2 homozygous deletion
Source: eLife journal article supplement (doi:10.7554/elife.26129), 2017-08-02
Supplement: supp [file elife-26129-supp-v2.zip › elife_poa_e26129_Figure_3_source_data.xls]

## Sheet: Figure 3B
FXR1-H358-sh3-FXR1-V1-V3-RESCUE
1D		sh3-vector	sh3-FXR1-V1-M	sh3-FXR1-V3-M	SD	SD	SD
Dox-		0.213	0.223	0.22
		0.204	0.206	0.205
		0.205	0.206	0.204
		0.0855	0.0898333	0.0851667	0.00493288	0.00981495	0.00896289
Dox+		0.214	0.211	0.21
		0.199	0.197	0.2
		0.199	0.201	0.21
		0.0821667	0.0811667	0.0821667	0.00866025	0.0072111	0.0057735
4D
Dox-		0.548	0.543	0.573
		0.549	0.541	0.574
		0.518	0.53	0.61
		0.422833	0.4225	0.461167	0.0176163	0.007	0.0210792
Dox+		0.174	0.47	0.169
		0.178	0.446	0.184
		0.185	0.463	0.179
		0.0635	0.344167	0.0528333	0.00556776	0.0123423	0.00763763
7D
Dox-		0.916	0.952	1.032
		0.96	0.94	1.025
		0.918	0.912	0.985
		0.828333	0.831667	0.8895	0.0248462	0.0205264	0.0253574
Dox+		0.24	0.932	0.233
		0.21	0.912	0.225
		0.224	0.905	0.25
		0.121667	0.813333	0.1115	0.0150111	0.0140119	0.0127671
10D
Dox-		1.791	1.745	1.756
		1.657	1.678	1.706
		1.681	1.745	1.696
		1.58517	1.59817	1.59483	0.0714516	0.0386825	0.0321455
Dox+		0.631	1.664	0.666
		0.75	1.64	0.584
		0.432	1.685	0.495
		0.479833	1.5385	0.457167	0.160668	0.0225167	0.0855239
0.124		0.12		0.102		0.138
0.12		0.115		0.102		0.128
0.125		0.115		0.104		0.119
0.121		0.116		0.103		0.122
0.119		0.112		0.103		0.118
0.122		0.115		0.104		0.122
	0.121833		0.1155		0.103		0.1245
