# Supplementary material for: FXR1 regulates transcription and is required for growth of human cancer cells with TP53/FXR2 homozygous deletion
Source: eLife journal article supplement (doi:10.7554/elife.26129), 2017-08-02
Supplement: supp [file elife-26129-supp-v2.zip › elife_poa_e26129_Figure_5_Figure_supplement_3_source_data.xls]

## Sheet: Figure 5-S3B
GLI1-ChIP-P1F/R
	STAT3-sh2-Dox-		STAT3-sh2-Dox+
FXR1	1.24264	0.187431	1.13109	0.0525039
STAT3	0.947035	0.226468	0.55012	0.16504
IgG	0.11558	0.0120115	0.271417	0.0542837
NPAS3-ChIP-P1F/R
	STAT3-sh2-Dox-		STAT3-sh2-Dox+
FXR1	0.871748	0.377384	1.31961	0.0952265
STAT3	0.550931	0.0815961	0.395664	0.0289728
IgG	0.0647519	0.0152719	0.239215	0.039487
CASC4-ChIP-P4F/R
	STAT3-sh2-Dox-		STAT3-sh2-Dox+
FXR1	0.942181	0.109915	0.908605	0.0559647
STAT3	0.335802	0.0449101	0.334388	0.00132497
IgG	0.0349972	0.00172032	0.153799	0.00698777
NPAS3-ChIP-P2F/R
	STAT3-sh2-Dox-		STAT3-sh2-Dox+
FXR1	1.01144	0.18498	0.90902	0.0144731
STAT3	0.501272	0.0342022	0.330843	0.00510988
IgG	0.0456766	0.0219431	0.12701	0.00154768
