# Supplementary material for: FXR1 regulates transcription and is required for growth of human cancer cells with TP53/FXR2 homozygous deletion
Source: eLife journal article supplement (doi:10.7554/elife.26129), 2017-08-02
Supplement: supp [file elife-26129-supp-v2.zip › elife_poa_e26129_Figure_5_Figure_supplement_4_source_data.xls]

## Sheet: Sheet1
AGS	GLI1			CASC4			ARIDIA			CITED			SSBP2			TRACCP9			NPAS3
input	23.5291	23.2891	23.8121	23.3962	23.3682	23.3613	22.4649	22.3929	22.4189	21.4452	21.2518	21.5133	24.0681	24.0128	24.1815	22.7929	22.5329	22.8636	23.3465	23.4126	23.1837
FXR1 sigma	28.7726	28.6706	28.5126	29.4804	29.468	29.3904	28.1819	28.2082	28.1308	27.854	27.794	27.8034	30.1193	30.3466	30.2093	29.0902	29.1302	29.2125	29.0554	29.1234	29.1254
