# Supplementary material for: FXR1 regulates transcription and is required for growth of human cancer cells with TP53/FXR2 homozygous deletion
Source: eLife journal article supplement (doi:10.7554/elife.26129), 2017-08-02
Supplement: supp [file elife-26129-supp-v2.zip › elife_poa_e26129_Figure_5_Figure_supplement_5_source_data.xls]

## Sheet: Sheet1
H358	NPAS3-primer1			NPAS3-primer2			SSBP2-primer1			SSBP2-primer2			CITED-primer11			CITED-primer12			CITED-primer21			CITED-primer22
JAKi(um)	mean	SD
0	1	0.157499		1	0.073012		1	0.0566862		1	0.1488		1	0		1	0.0360892		1	0.0683069		1	0.0823912
0.3	0.817024	0.0432047		1.09065	0.148288		1.29753	0.0397441		1.32647	0.0998607		0.829888	0.258342		1.01769	0.0798091		1.02089	0.0865302		1.73735	0.15319
1	0.42202	0.00223926		0.367663	0.0555426		1.87133	0.207054		1.25037	0.430535		0.679756	0.113153		1.21002	0.10869		1.1922	0.0581346		1.69928	0.321168
	SPATA6-primer1			SPATA6-primer2
0	1	0.0171724		1	0.0802617
0.3	1.24949	0.0168483		1.36529	0.131407
1	1.17296	0.0299033		1.2635	0.102544
	ARID1A-primer1			ARID1A-primer2			CASC4-primer1			CASC4-primer2			GLI1-primer1			GLI1-primer2			TRAPP9-primer1			TRAPP9-primer2
0	1	0.0989885		1	0.0434249		1	0.0763781		1	0.0770094		1	0.144107		1	0.516613		1	0.140589		1	0.0647939
0.3	1.11473	0.237641		1.35485	0.0276		1.30011	0.144843		1.27154	0.087961		0.630189	0.300056		0.821633	0.195912		1.63765	0.196583		1.49188	0.11285
1	0.0768352	0.00710303		0.00358402	0.000925739		1.29627	0.100385		0.540133	0.204733		0.0274638	0.0131869		#DIV/0!	#DIV/0!		0.0623156	0.0134648		0.0750682	0.0101452
