# Supplementary material for: FXR1 regulates transcription and is required for growth of human cancer cells with TP53/FXR2 homozygous deletion
Source: eLife journal article supplement (doi:10.7554/elife.26129), 2017-08-02
Supplement: supp [file elife-26129-supp-v2.zip › elife_poa_e26129_Figure_5_Figure_supplement_6_source_data.xls]

## Sheet: Sheet1
5 days
	H358	KATOIII	A549
blank	0.122	0.118	0.118
DMSO	1.299	0.818	1.975
	1.288	0.582	1.961
	1.448	0.939	2.041
mean	1.225	0.659667	1.87233
SD	0.08937	0.181561	0.0427239
JAKi	1.358	1.289	2.062
	1.274	1.316	2.005
	1.142	1.273	1.92
blank	0.125	0.122	0.121
mean	1.138	1.17267	1.87567
SD	0.108885	0.0217332	0.0714586
