# Supplementary material for: FXR1 regulates transcription and is required for growth of human cancer cells with TP53/FXR2 homozygous deletion
Source: eLife journal article supplement (doi:10.7554/elife.26129), 2017-08-02
Supplement: supp [file elife-26129-supp-v2.zip › elife_poa_e26129_Figure_5_source_data.xls]

## Sheet: Figure 5E
H358		Tet-Ctrl +Dox 0D		Tet-Ctrl +Dox 4D		FXR1-sh3 +Dox 0D		FXR1-sh3 +Dox 4D
	ARID1A	1	0.143213	1.17219	0.124463	1.37986	0.0483022	0.895848	0.161773
	CASC4	1	0.143213	1.18623	0.124463	1.02292	0.0483022	0.396333	0.161773
	TRAPPC9	1	0.143213	1.09336	0.124463	1.03222	0.0483022	0.636674	0.161773
	GLI1	1	0.143213	1.96672	0.124463	1.65056	0.0483022	0.538871	0.161773
	CITED	1	0.143213	1.2129	0.124463	1.39345	0.0483022	0.782151	0.161773
	NPAS3	1	0.0369016	1.13986	0.0596468	1.17322	0.0356391	0.328231	0.0104854
	SSBP2	1	0.0369016	1.67775	0.0596468	1.0517	0.0356391	0.598922	0.0104854
			Read1	Read2	Read3	Average	GAPDH	dCt	dd Ct	Fold	dd Ct	Fold	STDEV.P(D:F)		SQRT(L3*L3+M3*M3)	N3*K3*LN(2)
20140709	ARID1A	H358-Ctrl-0D		18.1874		18.1874	15.9463	2.24111	0	1	0	1		0.206613	0.206613	0.143213
PlateD140609	ARID1A	H358-Ctrl-2D		17.924		17.924	15.9673	1.95667	-0.284439	1.21794	-0.284439	1.21794		0.135775	0.135775	0.114623
	ARID1A	H358-Ctrl-3D		18.2824		18.2824	16.4112	1.87115	-0.369967	1.29232	-0.369967	1.29232		0.405137	0.405137	0.362909
	ARID1A	H358-Ctrl-4D		17.9477		17.9477	15.9358	2.01191	-0.229202	1.17219	-0.229202	1.17219		0.153186	0.153186	0.124463
primer1	ARID1A	H358-sh3-0D		17.7901		17.7901	16.0135	1.77659	0	1	-0.464523	1.37986		0.0505017	0.0505017	0.0483022
H358	ARID1A	H358-sh3-2D		18.0292		18.0292	16.1797	1.84942	0.0728333	0.950769	-0.39169	1.31193		0.0471408	0.0471408	0.042868
	ARID1A	H358-sh3-3D		18.1591		18.1591	16.3886	1.7705	-0.006086	1.00423	-0.470609	1.38569		0.0737309	0.0737309	0.0708178
	ARID1A	H358-sh3-4D		18.0867		18.0867	15.6869	2.39979	0.623196	0.649231	0.158673	0.895848		0.260523	0.260523	0.161773
20140612	CASC4	H358-Ctrl-0D	17.7883			17.7883	15.9463	1.84201	0	1	0	1		0.206613	0.206613	0.143213
PlateD140609	CASC4	H358-Ctrl-2D	17.8425			17.8425	15.9673	1.87511	0.0331	0.977318	0.0331	0.977318		0.135775	0.135775	0.0919774
	CASC4	H358-Ctrl-3D	18.3981			18.3981	16.4112	1.98685	0.14484	0.90448	0.14484	0.90448		0.405137	0.405137	0.253995
	CASC4	H358-Ctrl-4D	17.5315			17.5315	15.9358	1.59563	-0.246384	1.18623	-0.246384	1.18623		0.153186	0.153186	0.125954
primer1	CASC4	H358-sh3-0D	17.8228			17.8228	16.0135	1.80932	0	1	-0.032695	1.02292		0.0505017	0.0505017	0.0358075
H358	CASC4	H358-sh3-2D	18.6188			18.6188	16.1797	2.4391	0.629784	0.646273	0.597089	0.661086		0.0471408	0.0471408	0.0216013
	CASC4	H358-sh3-3D	18.9218			18.9218	16.3886	2.53317	0.723853	0.605478	0.691158	0.619357		0.0737309	0.0737309	0.031653
	CASC4	H358-sh3-4D	18.8641			18.8641	15.6869	3.17723	1.36791	0.387452	1.33522	0.396333		0.260523	0.260523	0.07157
20140709	TRAPPC9	H358-Ctrl-0D	20.162			20.162	15.9463	4.21572	0	1	0	1		0.206613	0.206613	0.143213
PlateD140609	TRAPPC9	H358-Ctrl-2D	19.9065			19.9065	15.9673	3.93911	-0.276605	1.21134	-0.276605	1.21134		0.135775	0.135775	0.114002
	TRAPPC9	H358-Ctrl-3D	20.5005			20.5005	16.4112	4.08923	-0.126488	1.09163	-0.126488	1.09163		0.405137	0.405137	0.306552
	TRAPPC9	H358-Ctrl-4D	20.0228			20.0228	15.9358	4.08695	-0.128771	1.09336	-0.128771	1.09336		0.153186	0.153186	0.116093
primer1	TRAPPC9	H358-sh3-0D	20.1835			20.1835	16.0135	4.16996	0	1	-0.045756	1.03222		0.0505017	0.0505017	0.0361331
H358	TRAPPC9	H358-sh3-2D	20.2546			20.2546	16.1797	4.07484	-0.0951227	1.06816	-0.140879	1.10258		0.0471408	0.0471408	0.0360273
	TRAPPC9	H358-sh3-3D	20.5165			20.5165	16.3886	4.12785	-0.042116	1.02962	-0.087872	1.0628		0.0737309	0.0737309	0.0543159
	TRAPPC9	H358-sh3-4D	20.554			20.554	15.6869	4.86709	0.697128	0.616799	0.651372	0.636674		0.260523	0.260523	0.114971
20140709	GLI1	H358-Ctrl-0D		23.2466		23.2466	15.9463	7.30033	0	1	0	1		0.206613	0.206613	0.143213
PlateD140609	GLI1	H358-Ctrl-2D		22.817		22.817	15.9673	6.84963	-0.450705	1.36671	-0.450705	1.36671		0.135775	0.135775	0.128624
	GLI1	H358-Ctrl-3D		22.5319		22.5319	16.4112	6.12064	-1.17969	2.26528	-1.17969	2.26528		0.405137	0.405137	0.636135
	GLI1	H358-Ctrl-4D		22.2604		22.2604	15.9358	6.32455	-0.975789	1.96672	-0.975789	1.96672		0.153186	0.153186	0.208827
primer1	GLI1	H358-sh3-0D		22.5909		22.5909	16.0135	6.57737	0	1	-0.722959	1.65056		0.0505017	0.0505017	0.0577781
H358	GLI1	H358-sh3-2D		22.0399		22.0399	16.1797	5.86021	-0.717162	1.64394	-1.44012	2.71344		0.0471408	0.0471408	0.0886629
	GLI1	H358-sh3-3D		23.0229		23.0229	16.3886	6.63426	0.056887	0.961336	-0.666072	1.58675		0.0737309	0.0737309	0.0810928
	GLI1	H358-sh3-4D		23.8792		23.8792	15.6869	8.19232	1.61495	0.326477	0.891989	0.538871		0.260523	0.260523	0.0973096
20140612	CITED1	H358-Ctrl-0D	21.1215			21.1215	15.9463	5.17523	0	1	0	1		0.206613	0.206613	0.143213
PlateD140609	CITED1	H358-Ctrl-2D	20.9248			20.9248	15.9673	4.95745	-0.217783	1.16295	-0.217783	1.16295		0.135775	0.135775	0.109447
	CITED1	H358-Ctrl-3D	21.1361			21.1361	16.4112	4.72484	-0.45039	1.36641	-0.45039	1.36641		0.405137	0.405137	0.383714
	CITED1	H358-Ctrl-4D	20.8326			20.8326	15.9358	4.89677	-0.278464	1.2129	-0.278464	1.2129		0.153186	0.153186	0.128786
primer1	CITED1	H358-sh3-0D	20.7101			20.7101	16.0135	4.69656	0	1	-0.478664	1.39345		0.0505017	0.0505017	0.0487779
H358	CITED1	H358-sh3-2D	21.0871			21.0871	16.1797	4.90739	0.210824	0.864043	-0.26784	1.204		0.0471408	0.0471408	0.0393414
	CITED1	H358-sh3-3D	21.6156			21.6156	16.3886	5.22695	0.530385	0.69237	0.051721	0.964785		0.0737309	0.0737309	0.0493066
	CITED1	H358-sh3-4D	21.2166			21.2166	15.6869	5.52971	0.833144	0.561305	0.35448	0.782151		0.260523	0.260523	0.141241
20140807	NPAS3	H358-Ctrl-0D	26.5951			26.5951	15.4845	11.1106	0	1	0	1		0.0532377	0.0532377	0.0369016
PlateD140610	NPAS3	H358-Ctrl-2D	26.7265			26.7265	15.7926	10.9339	-0.176715	1.13031	-0.176715	1.13031		0.0163843	0.0163843	0.0128366
	NPAS3	H358-Ctrl-3D	26.4314			26.4314	15.8505	10.5808	-0.529791	1.44372	-0.529791	1.44372		0.157421	0.157421	0.157533
	NPAS3	H358-Ctrl-4D	26.5923			26.5923	15.6705	10.9218	-0.188854	1.13986	-0.188854	1.13986		0.0754937	0.0754937	0.0596468
left half	NPAS3	H358-sh3-0D	26.3338			26.3338	15.4536	10.8801	0	1	-0.230471	1.17322		0.043825	0.043825	0.0356391
H358	NPAS3	H358-sh3-2D	27.3029			27.3029	15.669	11.6339	0.75373	0.593068	0.523259	0.695798		0.088249	0.088249	0.0425617
	NPAS3	H358-sh3-3D	27.6671			27.6671	15.5734	12.0937	1.21358	0.431199	0.983104	0.50589		0.0445544	0.0445544	0.0156233
	NPAS3	H358-sh3-4D	28.1973			28.1973	15.4794	12.7178	1.83769	0.279769	1.60722	0.328231		0.046087	0.046087	0.0104854
20140820	SSBP2	H358-Ctrl-0D	20.5474			20.5474	15.5425	5.00486	0	1	0	1		0.0532377	0.0532377	0.0369016
PlateD140611	SSBP2	H358-Ctrl-2D	20.9335			20.9335	15.8153	5.11826	0.113401	0.924406	0.113401	0.924406		0.0163843	0.0163843	0.0104983
	SSBP2	H358-Ctrl-3D	20.0504			20.0504	16.0673	3.98303	-1.02183	2.0305	-1.02183	2.0305		0.157421	0.157421	0.22156
	SSBP2	H358-Ctrl-4D	19.9854			19.9854	15.7271	4.25833	-0.746532	1.67775	-0.746532	1.67775		0.0754937	0.0754937	0.087794
left half	SSBP2	H358-sh3-0D	20.3238			20.3238	15.3917	4.93214	-0.072726	1.0517	-0.072726	1.0517		0.043825	0.043825	0.0319477
H358	SSBP2	H358-sh3-2D	20.6117			20.6117	15.7088	4.90294	-0.101927	1.07321	-0.101927	1.07321		0.088249	0.088249	0.0656475
	SSBP2	H358-sh3-3D	20.4069			20.4069	15.566	4.84086	-0.164004	1.12039	-0.164004	1.12039		0.0445544	0.0445544	0.0346008
	SSBP2	H358-sh3-4D	21.2609			21.2609	15.5165	5.74442	0.73956	0.598922	0.73956	0.598922		0.046087	0.046087	0.0191326
			Reading 1	Reading 2	Reading 3	Ave Ct					GAPDH SD
						AVERAGE(D:F)
	GAPDH	H358-Ctrl-0D	16.1116	15.655	16.0724	15.9463					0.206613
	GAPDH	H358-Ctrl-2D	16.0021	15.7864	16.1135	15.9673					0.135775
	GAPDH	H358-Ctrl-3D	16.0256	16.971	16.237	16.4112					0.405137
	GAPDH	H358-Ctrl-4D	15.9717	15.7329	16.1029	15.9358					0.153186
	GAPDH	H358-sh3-0D	15.9618	16.082	15.9967	16.0135					0.0505017
	GAPDH	H358-sh3-2D	16.1759	16.124	16.2393	16.1797					0.0471408
	GAPDH	H358-sh3-3D	16.2865	16.4578	16.4215	16.3886					0.0737309
	GAPDH	H358-sh3-4D	15.7736	15.3334	15.9536	15.6869					0.260523
			Reading 1	Reading 2	Reading 3	Ave Ct					GAPDH SD
						AVERAGE(D:F)
	GAPDH	H358-Ctrl-0D	15.5425	15.4139	15.497	15.4845					0.0532377
	GAPDH	H358-Ctrl-2D	15.8153	15.7771	15.7855	15.7926					0.0163843
	GAPDH	H358-Ctrl-3D	16.0673	15.6983	15.7859	15.8505					0.157421
	GAPDH	H358-Ctrl-4D	15.7271	15.5638	15.7206	15.6705					0.0754937
	GAPDH	H358-sh3-0D	15.3917	15.4831	15.4862	15.4536					0.043825
	GAPDH	H358-sh3-2D	15.7088	15.7516	15.5467	15.669					0.088249
	GAPDH	H358-sh3-3D	15.566	15.5229	15.6313	15.5734					0.0445544
	GAPDH	H358-sh3-4D	15.5165	15.4145	15.5073	15.4794					0.046087

## Sheet: Figure 5G
CASC4-ChIP-P3F/R
	STAT3-sh2-Dox-		STAT3-sh2-Dox+
	mean	sd	mean	sd
FXR1	0.988503	0.180037	1.05002	0.134843
STAT3	0.970487	0.0552318	0.669845	0.0944043
IgG	0.109259	0.036511	0.324177	0.0663023
GLI1-ChIP-M1F/R
	STAT3-sh2-Dox-		STAT3-sh2-Dox+
FXR1	1.57452	0.584201	2.18458	0.70407
STAT3	0.67184	0.0201194	0.719766	0.0970545
IgG	0.1194	0.0134936	0.267104	0.0518567
			Reading 1	Reading 2	Reading 3	Ave Ct	GAPDH Ct	dCt	dd Ct	Fold	SD Ct	GAPDH SD		SD Fold			SD relative
						AVERAGE(D:F)	Average GAPDH	G-H	dCt-dCt(Ctrl)	2^(-J3)	STDEV.P(D:F)		SQRT(L3*L3+M3*M3)	N3*K3*LN(2)
CASC4-ChIP-P3F/R			CASC4-P3
	STAT3-sh2-Dox-	FXR1	28.0624	27.8053	27.4229	27.7635		27.7635	27.7635	4.38874e-09	0.262759		0.262759	7.99323e-10	0.00988503	0.988503	0.180037
	STAT3-sh2-Dox-	STAT3	27.6904	27.7884	27.8915	27.7901		27.7901	27.7901	4.30875e-09	0.0821058		0.0821058	2.45217e-10	0.00970487	0.970487	0.0552318
	STAT3-sh2-Dox-	IgG	30.359	30.9245	31.5396	30.941		30.941	30.941	4.85086e-10	0.482104		0.482104	1.62101e-10	0.00109259	0.109259	0.036511
	STAT3-sh2-Dox-	Input(5%)	21.1257	21.0882	21.0951	21.103		21.103	21.103	4.43978e-07	0.0162926		0.0162926	5.01393e-09	1	100
CASC4-ChIP-P3F/R
	STAT3-sh2-Dox+4days	FXR1	27.6367	27.645	28.0338	27.7719		27.7719	27.7719	4.36353e-09	0.18527		0.18527	5.60361e-10	0.0105002	1.05002	0.134843
	STAT3-sh2-Dox+4days	STAT3	28.6664	28.4263	28.1684	28.4204		28.4204	28.4204	2.78364e-09	0.203326		0.203326	3.92312e-10	0.00669845	0.669845	0.0944043
	STAT3-sh2-Dox+4days	IgG	29.4142	29.1356	29.8525	29.4674		29.4674	29.4674	1.34717e-09	0.295068		0.295068	2.75529e-10	0.00324177	0.324177	0.0663023
	STAT3-sh2-Dox+4days	Input(5%)	21.2727	21.0003	21.3222	21.1984		21.1984	21.1984	4.15565e-07	0.141527		0.141527	4.07665e-08	1	100
GLI1-ChIP-M1F/R
	STAT3-sh2-Dox-	FXR1	25.6136	26.4161	26.9129	26.3142		26.3142	26.3142	1.19848e-08	0.535289		0.535289	4.44677e-09	0.0157452	1.57452	0.584201
	STAT3-sh2-Dox-	STAT3	27.4823	27.5796	27.5669	27.5429		27.5429	27.5429	5.11385e-09	0.0432041		0.0432041	1.53143e-10	0.0067184	0.67184	0.0201194
	STAT3-sh2-Dox-	IgG	30.2535	29.8617	29.9905	30.0353		30.0353	30.0353	9.08837e-10	0.163042		0.163042	1.02709e-10	0.001194	0.1194	0.0134936
	STAT3-sh2-Dox-	Input(5%)		19.8985	20.752	20.3253		20.3253	20.3253	7.61171e-07	0.426737		0.426737	2.25148e-07	1	100
GLI1-ChIP-M1F/R
	STAT3-sh2-Dox+4days	FXR1		25.774	26.704	26.239		26.239	26.239	1.26262e-08	0.464968		0.464968	4.06931e-09	0.0218458	2.18458	0.70407
	STAT3-sh2-Dox+4days	STAT3	27.9508	27.5674	28.0041	27.8408		27.8408	27.8408	4.16004e-09	0.194535		0.194535	5.60946e-10	0.00719766	0.719766	0.0970545
	STAT3-sh2-Dox+4days	IgG	29.6565	28.9998	29.1564	29.2709		29.2709	29.2709	1.54378e-09	0.28009		0.28009	2.99716e-10	0.00267104	0.267104	0.0518567
	STAT3-sh2-Dox+4days	Input(5%)	20.8903	20.699	20.5783	20.7225		20.7225	20.7225	5.77971e-07	0.128471		0.128471	5.14679e-08	1	100

## Sheet: Figure 5J
	Ctrl				FXR2-sh3
	Dox-		Dox+		Dox-		Dox+
Gene	Mean	SD	Mean	SD	Mean	SD	Mean	SD
FXR2	1	0.0453893	1.02142	0.0345368	0.999728	0.0355771	0.224242	0.0090426
ARID1A	1	0.445738	1.16333	1.05178	1.31719	0.416885	1.07432	0.865747
CASC4	1	0.0577818	0.874356	0.106918	1.17991	0.128041	0.961311	0.0836779
TRAPPC9	1	0.0887177	0.913472	0.0841942	0.953587	0.039816	0.690748	0.0402225
NPAS3	1	0.576599	0.966715	0.0851763	1.2289	0.00602317	0.80809	0.236666
SSBP2	1	0.170887	1.14169	0.15933	1.31241	0.194566	1.81709	0.17603

## Sheet: Figure 5K
H358	GLI1-primer1			ARID1A-primer2			SSBP2-primer2
JAKi(um)	mean	SD		mean	SD		mean	SD
0	1	0.144107		1	0.0434249		1	0.1488
0.3	0.630189	0.300056		1.35485	0.0276		1.32647	0.0998607
1	0.0274638	0.0131869		0.00358402	0.000925739		1.25037	0.430535
