# Supplementary material for: FXR1 regulates transcription and is required for growth of human cancer cells with TP53/FXR2 homozygous deletion
Source: eLife journal article supplement (doi:10.7554/elife.26129), 2017-08-02
Supplement: supp [file elife-26129-supp-v2.zip › elife_poa_e26129_Figure_6_Figure_supplement_1_source_data.xls]

## Sheet: Figure6-S1A
			Reading 1	Reading 2	Reading 3	Ave Ct	GAPDH Ct	dCt	dd Ct	Fold
	PRIMER1	H358				AVERAGE(D:F)	Average GAPDH	G-H	dCt-dCt(Ctrl)	2^(-J3)
	ARID1A	N.C.	21.6612	21.6607		21.661		21.661	0	1
		Control siRNA	21.3738	21.5442		21.459		21.459	-0.20198	1.15028
		si1	28.9845	29.2478		29.1162		29.1162	7.45517	0.00569863
		si2	29.2257	29.2622		29.2439		29.2439	7.58293	0.00521567
		si3	29.3302	29.0268		29.1785		29.1785	7.51751	0.00545762
		si4	28.6288	28.7835		28.7061		28.7061	7.04516	0.00757176
		si5	23.9223	23.4786		23.7004		23.7004	2.03946	0.243255
	CASC4	N.C.	18.8901	18.9347	19.2037	19.0095		19.0095	0	1
		Control siRNA	19.2579	19.228	19.7837	19.4232		19.4232	0.413663	0.750715
		si1	27.5194	27.4574	27.4351	27.4706		27.4706	8.46113	0.00283757
		si2	26.9931	27.1578	27.3294	27.1601		27.1601	8.15057	0.00351912
		si3	24.6609	24.8092	24.966	24.812		24.812	5.80251	0.0179172
		si4	23.6418	24.1209	24.1431	23.9686		23.9686	4.95912	0.0321482
		si5	26.1314	25.469	25.9283	25.8429		25.8429	6.83337	0.00876904
	CITED1	N.C.	35.8015	34.4853	34.8497	35.0455		35.0455	0	1
		Control siRNA	32.2902	34.1278	32.6826	33.0335		33.0335	-2.01198	4.03336
		si1	Undetermined	35.6918	Undetermined	35.6918		35.6918	0.646262	0.638934
		si2	Undetermined	Undetermined	Undetermined	#DIV/0!		#DIV/0!	#DIV/0!	#DIV/0!
		si3	Undetermined	Undetermined	Undetermined	#DIV/0!		#DIV/0!	#DIV/0!	#DIV/0!
		si4	Undetermined	Undetermined	Undetermined	#DIV/0!		#DIV/0!	#DIV/0!	#DIV/0!
		si5	Undetermined	35.1489	37.1485	36.1487		36.1487	1.10316	0.465496
	NPAS3	N.C.	24.5899	24.1249	24.3585	24.3578		24.3578	0	1
		Control siRNA	25.72	25.8092	25.967	25.8321		25.8321	1.47429	0.359911
		si1	25.9456	25.3027	25.4633	25.5705		25.5705	1.21275	0.431445
		si2	28.8659	30.2846	29.614	29.5882		29.5882	5.23039	0.0266377
		si3	33.106	30.5322	32.3559	31.998		31.998	7.64025	0.00501251
		si4	30.649	30.2204	30.4667	30.4453		30.4453	6.08757	0.0147048
		si5	33.6273	37.0363	32.4417	34.3684		34.3684	10.0106	0.000969388
	SPATA6	N.C.	25.6992	25.9295	25.8109	25.8132		25.8132	0	1
		Control siRNA	26.2156	25.75	26.0523	26.006		26.006	0.192756	0.874933
		si1	31.0346	30.876	31.3077	31.0728		31.0728	5.25957	0.0261043
		si2	35.6514	34.5863	37.0032	35.747		35.747	9.93376	0.00102245
		si3	32.3057	31.6224	32.6273	32.1852		32.1852	6.37197	0.0120738
		si4	31.5938	31.5778	31.1956	31.4558		31.4558	5.64256	0.0200179
		si5	33.9393	32.2215	33.2038	33.1216		33.1216	7.30836	0.00630906
	SSBP2	N.C.	18.4381	18.7304	18.8549	18.6745		18.6745	0	1
		Control siRNA	19.5312	19.2328	19.4172	19.3937		19.3937	0.719217	0.607427
		si1	27.6232	27.4829	27.6025	27.5695		27.5695	8.89503	0.00210053
		si2	26.9358	27.8552	26.7921	27.1943		27.1943	8.51984	0.00272441
		si3	24.6815	24.4339	24.8365	24.6506		24.6506	5.9761	0.015886
		si4	28.5257	28.608	27.3196	28.1511		28.1511	9.47658	0.00140367
		si5	26.8732	26.0232	26.7408	26.5458		26.5458	7.87126	0.00427086
	TRAPPC9	N.C.	21.9998	22.0856	22.9552	22.3469		22.3469	0	1
		Control siRNA	22.7422	22.7576	22.8124	22.7707		22.7707	0.423882	0.745416
		si1	29.7171	29.8593	30.5709	30.0491		30.0491	7.70224	0.00480171
		si2	30.9717	31.2423	30.6132	30.9424		30.9424	8.59554	0.00258515
		si3	29.9413	31.7067	30.7548	30.801		30.801	8.4541	0.00285142
		si4	29.1699	30.9533	30.6904	30.2712		30.2712	7.92434	0.00411657
		si5	30.9636	32.6765	31.7002	31.7801		31.7801	9.43323	0.00144649

## Sheet: Figure6-S1B
Mock	1.05		Mock	114.13
Control-si	0.92		Control-si	100
ARID1A-si1	0.84		ARID1A-si1	91.3043
ARID1A-si2	0.53		ARID1A-si2	57.6087
ARID1A-si3	0.48		ARID1A-si3	52.1739
ARID1A-si4	0.78		ARID1A-si4	84.7826
ARID1A-si5	0.67		ARID1A-si5	72.8261
CASC4-si1	0.79		CASC4-si1	85.8696
CASC4-si2	0.6		CASC4-si2	65.2174
CASC4-si3	0.58		CASC4-si3	63.0435
CASC4-si4	0.89		CASC4-si4	96.7391
CASC4-si5	0.57		CASC4-si5	61.9565
TRAPPC9-si1	0.65		TRAPPC9-si1	70.6522
TRAPPC9-si2	0.87		TRAPPC9-si2	94.5652
TRAPPC9-si3	0.74		TRAPPC9-si3	80.4348
TRAPPC9-si4	0.78		TRAPPC9-si4	84.7826
TRAPPC9-si5	0.47		TRAPPC9-si5	51.087
GLI1-si1	0.51		GLI1-si1	55.4348
GLI1-si2	0.12		GLI1-si2	13.0435
GLI1-si3	0.067		GLI1-si3	7.28261
GLI1-si4	0.52		GLI1-si4	56.5217
GLI1-si5	0.31		GLI1-si5	33.6957
CITED1-si1	0.56		CITED1-si1	60.8696
CITED1-si2	0.39		CITED1-si2	42.3913
CITED1-si3	0.84		CITED1-si3	91.3043
CITED1-si4	0.13		CITED1-si4	14.1304
CITED1-si5	0.76		CITED1-si5	82.6087
NPAS3-si1	0.64		NPAS3-si1	69.5652
NPAS3-si2	0.52		NPAS3-si2	56.5217
NPAS3-si3	0.75		NPAS3-si3	81.5217
NPAS3-si4	0.98		NPAS3-si4	106.522
NPAS3-si5	0.97		NPAS3-si5	105.435
SSBP2-si1	0.91		SSBP2-si1	98.913
SSBP2-si2	0.63		SSBP2-si2	68.4783
SSBP2-si3	0.41		SSBP2-si3	44.5652
SSBP2-si4	0.11		SSBP2-si4	11.9565
SSBP2-si5	0.72		SSBP2-si5	78.2609
