# Supplementary material for: FXR1 regulates transcription and is required for growth of human cancer cells with TP53/FXR2 homozygous deletion
Source: eLife journal article supplement (doi:10.7554/elife.26129), 2017-08-02
Supplement: supp [file elife-26129-supp-v2.zip › elife_poa_e26129_Figure_6_Figure_supplement_2_source_data.xls]

## Sheet: Sheet1
Caspase3-luminescence-activity
			Ctrl	FXR1-sh2	FXR1-sh3
	1	2	3	4	5
A	728	992	1392	2344	3200
B	648	5976	24328	36072	42776
C	1128	6160	27024	41112	44840
D	832	5336	26904	41888	47192
Average			20197.3	33802.7	39048
SD			1523.08	3157.78	2209.56
E	944	6272	31064	65648	84224
F	696	6680	27640	86888	97456
G	472	4904	19336	66000	82408
H	960	1096	2368	3328	5384
Average		5888	20125.3	66957.3	82141.3
SD			6030.84	12162.6	8214.07
