# Supplementary material for: FXR1 regulates transcription and is required for growth of human cancer cells with TP53/FXR2 homozygous deletion
Source: eLife journal article supplement (doi:10.7554/elife.26129), 2017-08-02
Supplement: supp [file elife-26129-supp-v2.zip › elife_poa_e26129_Figure_6_source_data.xls]

## Sheet: Figure 6A
		mean	SD	percentage (siCtrl/Dox- set as 100%)	percentage SD
Mock	Dox-	2.06733	0.0159478	95.1811	0.734246
	Dox+	1.58433	0.01861	72.9435	0.856816
si-Ctrl	Dox-	2.172	0.0445084	100	2.04919
	Dox+	1.60933	0.0654548	74.0945	3.01357
ARID1A-si2	Dox-	2.05733	0.059079	94.7207	2.72003
	Dox+	1.54767	0.0921376	71.2554	4.24206
ARID1A-si3	Dox-	1.751	0.00264575	80.6169	0.121812
	Dox+	1.03433	0.0728858	47.6212	3.3557
CASC4-si2	Dox-	2.03267	0.0839127	93.585	3.86338
	Dox+	1.214	0.0432782	55.8932	1.99255
CASC4-si4	Dox-	2.12667	0.0852311	97.9128	3.92408
	Dox+	1.41533	0.0326548	65.1627	1.50344
GLI1-si2	Dox-	1.40533	0.00665833	64.7023	0.306553
	Dox+	0.689667	0.0352751	31.7526	1.62408
GLI1-si3	Dox-	1.50767	0.0626126	69.4138	2.88271
	Dox+	0.802	0.077324	36.9245	3.56004
SSBP2-si3	Dox-	2.103	0.0668431	96.8232	3.07749
	Dox+	1.23333	0.0401539	56.7833	1.8487
SSBP2-si4	Dox-	2.263	0.0590931	104.19	2.72068
	Dox+	1.32667	0.0465439	61.0804	2.1429
SPATA6-si3	Dox-	1.903	0.0453982	87.6151	2.09016
	Dox+	0.999667	0.11537	46.0252	5.31171
SPATA6-si4	Dox-	1.78167	0.0872716	82.0289	4.01803
	Dox+	1.35333	0.0080829	62.3082	0.372141
Dox+4days	siRNA+5days
3day	0.118	0.114	0.11	0.107	0.109	0.11							0.111333
	Mock	si-Ctrl	ARID1A-si2	ARID1A-si3	CASC4-si2	CASC4-si4	GLI1-si2	GLI1-si3	SSBP2-si3	SSBP2-si4	SPATA6-si3	SPATA6-si4
Dox-	2.196	2.334	2.236	1.865	2.239	2.336	1.522	1.679	2.288	2.44	2.029	1.792
	2.165	2.263	2.142	1.86	2.111	2.192	1.509	1.554	2.196	2.356	2.05	1.947
	2.174	2.252	2.127	1.861	2.081	2.185	1.518	1.623	2.158	2.326	1.963	1.939
Average	2.06733	2.172	2.05733	1.751	2.03267	2.12667	1.40533	1.50767	2.103	2.263	1.903	1.78167
STDEV	0.0159478	0.0445084	0.059079	0.00264575	0.0839127	0.0852311	0.00665833	0.0626126	0.0668431	0.0590931	0.0453982	0.0872716
Dox+	1.715	1.702	1.576	1.082	1.309	1.564	0.76	0.9	1.309	1.39	1.231	1.463
	1.693	1.793	1.642	1.129	1.292	1.509	0.819	0.843	1.336	1.44	1.1	1.473
	1.678	1.666	1.758	1.225	1.374	1.506	0.823	0.996	1.388	1.483	1.001	1.457
Average	1.58433	1.60933	1.54767	1.03433	1.214	1.41533	0.689667	0.802	1.23333	1.32667	0.999667	1.35333
STDEV	0.01861	0.0654548	0.0921376	0.0728858	0.0432782	0.0326548	0.0352751	0.077324	0.0401539	0.0465439	0.11537	0.0080829

## Sheet: Figure 6B
D5
	1	2	3	4	5	6	7	8	9	10	11	12
A	4480	8920	14760	18520	17680	15160	7120	3120	2560	1720	1200	1120
B	12000	285800	318160	332640	294840	342440	14800	3320	1800	1280	1000	840
C	13680	227840	222920	250200	239680	250400	19040	3800	3040	1880	1120	920
D	15320	336480	362400	344040	324040	325720	20720	5120	3120	1560	1320	840
E	17800	386040	373960	384960	351200	375600	20160	4760	3600	1760	960	520
F	12560	174800	223920	173280	219920	215760	19560	4840	3280	1960	920	840
G	12640	432680	418000	397440	415840	404120	18200	3080	2520	1560	1160	640
H	6600	13360	19200	16720	17160	11280	5640	2760	2000	880	640	760
	average blank	18746.7
	FXR1-tet-Ctrl_Dox-	285800	318160	332640	294840	342440
	FXR1-tet-Ctrl_Dox+	227840	222920	250200	239680	250400
	FXR1-tet-sh2_Dox-	336480	362400	344040	324040	325720
	FXR1-tet-sh2_Dox-+	386040	373960	384960	351200	375600
	FXR1-tet-sh3_Dox-	174800	223920	173280	219920	215760
	FXR1-tet-sh3_Dox-+	432680	418000	397440	415840	404120
	minus blank						Average	STEDV
Caspase3/7	FXR1-tet-Ctrl_Dox-	267053	299413	313893	276093	323693	296029	24150.2
	FXR1-tet-Ctrl_Dox+	209093	204173	231453	220933	231653	219461	12607.9
	FXR1-tet-sh2_Dox-	317733	343653	325293	305293	306973	319789	15639.7
	FXR1-tet-sh2_Dox-+	367293	355213	366213	332453	356853	355605	14025.6
	FXR1-tet-sh3_Dox-	156053	205173	154533	201173	197013	182789	25271.3
	FXR1-tet-sh3_Dox-+	413933	399253	378693	397093	385373	394869	13596.3
MTS
	minus blank						Average	STEDV
	FXR1-tet-Ctrl_Dox-	2.16717	2.16617	2.15917	2.22017	2.18517	2.17957	0.0246435
	FXR1-tet-Ctrl_Dox+	2.12517	2.16817	2.16417	2.24517	2.21517	2.18357	0.04695
	FXR1-tet-sh2_Dox-	1.99717	1.97417	2.02117	1.96517	1.99717	1.99097	0.0220045
	FXR1-tet-sh2_Dox-+	1.41317	1.42917	1.38517	1.46217	1.40517	1.41897	0.0288825
	FXR1-tet-sh3_Dox-	1.59617	1.62017	1.62817	1.62517	1.63617	1.62117	0.0151327
	FXR1-tet-sh3_Dox-+	1.28317	1.27517	1.29017	1.27817	1.28317	1.28197	0.00571839
Caspase3/7 normalized with MTS
							Average	STEDV
	FXR1-tet-Ctrl_Dox-	123227	138223	145377	124357	148132	135863	11604.7
	FXR1-tet-Ctrl_Dox+	98389.1	94168.7	106948	98404	104576	100497	5175.08
	FXR1-tet-sh2_Dox-	159092	174075	160943	155352	153704	160633	8047.55
	FXR1-tet-sh2_Dox-+	259908	248546	264382	227370	253958	250833	14417.3
	FXR1-tet-sh3_Dox-	97767.6	126637	94912.5	123786	120412	112703	15132.7
	FXR1-tet-sh3_Dox-+	322587	313099	293523	310674	300330	308043	11339.7

## Sheet: Figure 6C
	Background	Mock	Ctrl	GLI1-si2	GLI1-si3
	61560	2364160	2376520	8485480	8601160
	69400	2414640	2674120	8286040	9628400
	75200	2838960	3001760	9331480	10063640
	75880	2887920	3410000	9296520	10165240
	76080	3703840	3723480	9659480	10220960
	66600	3178440	3527960	9768520	10586800
Average	70786.7	2.89799e+06	3.11897e+06	9137920	9877700
Average-blank		2.82721e+06	3.04819e+06	9.06713e+06	9.80691e+06
stdev		500047	525408	613788	697081
Calculated results: Calc 1: Crosstalk = Crosstalk correction where Label : Copy of US LUM 96 (cps)(1) channel 1
	1	2	3	4	5	6	7	8	9	10	11	12
A	4000	5880	7560	15600	31840	47520	69520	65000	24880	8480	6760	5640
B	4520	6640	10520	61560	2364160	2376520	8485480	8601160	68960	11880	8080	6280
C	5200	7960	12360	69400	2414640	2674120	8286040	9628400	89640	15720	9800	7680
D	6120	8760	14720	75200	2838960	3001760	9331480	10063640	94800	18440	10760	8320
E	6160	8240	14480	75880	2887920	3410000	9296520	10165240	91400	18200	12120	9040
F	5880	8920	14440	76080	3703840	3723480	9659480	10220960	84880	16880	11520	8000
G	5200	7720	12240	66600	3178440	3527960	9768520	10586800	67200	14040	8920	7000
H	4600	6640	9840	18720	36280	49320	65840	63040	25200	10440	7000	5080
