# Supplementary material for: FXR1 regulates transcription and is required for growth of human cancer cells with TP53/FXR2 homozygous deletion
Source: eLife journal article supplement (doi:10.7554/elife.26129), 2017-08-02
Supplement: supp [file elife-26129-supp-v2.zip › elife_poa_e26129_Supplementary_File_1.xlsx]

## Sheet: FXR1_KATOIII_07
Saint Bait	Prey	Entry	Total Spec	Max SAINT
FXR1	B4DUT8	B4DUT8	14	1
FXR1	Q13310-2	Q13310	15	1
FXR1	Q15149-8	Q15149	215	1
FXR1	P12814	P12814	67	1
FXR1	Q06787-6	Q06787	32	1
FXR1	Q15029	Q15029	29	1
FXR1	P31948	P31948	26	1
FXR1	Q15149-3	Q15149	284	1
FXR1	Q99623	Q99623	34	1
FXR1	P62136	P62136	32	1
FXR1	P06753-2	P06753	33	1
FXR1	Q06787-5	Q06787	31	1
FXR1	P40227-2	P40227	17	1
FXR1	Q9BYR8	Q9BYR8	17	1
FXR1	P53396	P53396	22	1
FXR1	P49368	P49368	30	1
FXR1	P21802-11	P21802	20	1
FXR1	P55060	P55060	48	1
FXR1	P04406	P04406	84	1
FXR1	P51148	P51148	12	1
FXR1	P36873-2	P36873	31	1
FXR1	P48643	P48643	36	1
FXR1	O00567	O00567	27	1
FXR1	J3KN35	J3KN35	17	1
FXR1	P52209	P52209	18	1
FXR1	P61163	P61163	18	1
FXR1	O43776	O43776	24	1
FXR1	Q13492-3	Q13492	15	1
FXR1	P26368-2	P26368	17	1
FXR1	Q5STU3	Q5STU3	13	1
FXR1	P07910-2	P07910	25	1
FXR1	P09493-4	P09493	23	1
FXR1	P31350	P31350	21	1
FXR1	Q9Y3F4	Q9Y3F4	15	1
FXR1	P09493-3	P09493	23	1
FXR1	P08865	P08865	18	1
FXR1	Q9UHB6	Q9UHB6	60	1
FXR1	P0CG38	P0CG38	81	1
FXR1	P48729	P48729	19	1
FXR1	P09972	P09972	19	1
FXR1	Q15366-4	Q15366	23	1
FXR1	A8MQB8	A8MQB8	34	1
FXR1	Q12906-4	Q12906	20	1
FXR1	P11388-4	P11388	49	1
FXR1	Q9NZM1-6	Q9NZM1	67	1
FXR1	O60437	O60437	25	1
FXR1	P02545-2	P02545	142	1
FXR1	P16144-4	P16144	23	1
FXR1	Q8WWI1	Q8WWI1	26	1
FXR1	Q92616	Q92616	49	1
FXR1	E9PPU0	E9PPU0	205	1
FXR1	I3L1M0	I3L1M0	125	1
FXR1	Q92841-1	Q92841	42	1
FXR1	Q14008-3	Q14008	16	1
FXR1	P42704	P42704	73	1
FXR1	Q7Z406-6	Q7Z406	129	1
FXR1	P12532	P12532	17	0.998
FXR1	Q13200	Q13200	25	0.998
FXR1	P29692-3	P29692	15	0.998
FXR1	Q9Y224	Q9Y224	12	0.998
FXR1	Q92499	Q92499	21	0.998
FXR1	Q00341	Q00341	30	0.998
FXR1	Q15019	Q15019	14	0.998
FXR1	P46734	P46734	13	0.998
FXR1	Q32Q12	Q32Q12	29	0.998
FXR1	Q99832-3	Q99832	17	0.998
FXR1	Q86VP6	Q86VP6	16	0.998
FXR1	Q12904	Q12904	13	0.998
FXR1	Q8WWM7-2	Q8WWM7	15	0.998
FXR1	Q14157-1	Q14157	17	0.998
FXR1	O00541-2	O00541	15	0.998
FXR1	Q14240	Q14240	16	0.998
FXR1	Q13838-2	Q13838	25	0.998
FXR1	Q15286	Q15286	10	0.998
FXR1	B4DXY3	B4DXY3	15	0.998
FXR1	Q9H4M9	Q9H4M9	21	0.998
FXR1	Q9UDY2-7	Q9UDY2	13	0.998
FXR1	Q6NXG1-3	Q6NXG1	12	0.998
FXR1	P62820	P62820	14	0.998
FXR1	J3QQV1	J3QQV1	22	0.998
FXR1	Q92621	Q92621	16	0.998
FXR1	Q14980-3	Q14980	18	0.998
FXR1	P13804	P13804	18	0.996
FXR1	P31939	P31939	22	0.996
FXR1	P23193	P23193	11	0.996
FXR1	Q9UDY2-6	Q9UDY2	12	0.996
FXR1	P05023	P05023	23	0.996
FXR1	P63000	P63000	11	0.996
FXR1	O60361	O60361	17	0.996
FXR1	P61586	P61586	11	0.996
FXR1	P51659-3	P51659	13	0.996
FXR1	O75436	O75436	11	0.996
FXR1	P54136	P54136	28	0.996
FXR1	O14579	O14579	12	0.996
FXR1	O00410-2	O00410	12	0.996
FXR1	P61204	P61204	14	0.996
FXR1	O43809	O43809	14	0.996
FXR1	Q14974	Q14974	24	0.996
FXR1	E7ERI3	E7ERI3	11	0.996
FXR1	Q96E39	Q96E39	16	0.996
FXR1	P61289	P61289	16	0.994
FXR1	P29692-2	P29692	17	0.994
FXR1	Q06787-3	Q06787	13	0.994
FXR1	B4DJ10	B4DJ10	14	0.994
FXR1	Q96C19	Q96C19	11	0.994
FXR1	P43243	P43243	19	0.994
FXR1	O75116	O75116	17	0.994
FXR1	P26640	P26640	24	0.994
FXR1	O43684-2	O43684	13	0.994
FXR1	P30044	P30044	13	0.994
FXR1	Q96A72	Q96A72	9	0.994
FXR1	P43487	P43487	8	0.994
FXR1	F8W7C6	F8W7C6	15	0.994
FXR1	Q15185	Q15185	9	0.994
FXR1	P42330	P42330	13	0.994
FXR1	P25786	P25786	12	0.994
FXR1	Q14019	Q14019	9	0.994
FXR1	P62879	P62879	12	0.994
FXR1	Q14240-2	Q14240	13	0.994
FXR1	Q9NX02-2	Q9NX02	12	0.992
FXR1	P60900	P60900	10	0.992
FXR1	P04632	P04632	8	0.992
FXR1	P51114-2	P51114	11	0.992
FXR1	Q9H4G0-2	Q9H4G0	12	0.992
FXR1	P35221	P35221	19	0.992
FXR1	P00338-3	P00338	12	0.992
FXR1	Q8NC51	Q8NC51	12	0.992
FXR1	P30041	P30041	11	0.992
FXR1	Q96QK1	Q96QK1	20	0.992
FXR1	P78347-3	P78347	15	0.992
FXR1	Q8N684-2	Q8N684	9	0.992
FXR1	P08243	P08243	17	0.992
FXR1	Q14683	Q14683	14	0.992
FXR1	B5MCX3	B5MCX3	14	0.992
FXR1	Q08945	Q08945	15	0.992
FXR1	B1AK88	B1AK88	11	0.992
FXR1	O15145	O15145	7	0.992
FXR1	Q8NFJ5	Q8NFJ5	12	0.992
FXR1	P68036	P68036	6	0.992
FXR1	Q9UJU6-2	Q9UJU6	10	0.992
FXR1	Q15369	Q15369	5	0.992
FXR1	P00918	P00918	10	0.99
FXR1	Q02880	Q02880	14	0.99
FXR1	P54577	P54577	13	0.99
FXR1	Q93008	Q93008	9	0.99
FXR1	P25205	P25205	16	0.99
FXR1	Q16891	Q16891	15	0.99
FXR1	Q27J81	Q27J81	13	0.99
FXR1	Q9BYK8	Q9BYK8	10	0.99
FXR1	P61081	P61081	9	0.99
FXR1	G5E9E7	G5E9E7	12	0.988
FXR1	Q9Y3A5	Q9Y3A5	8	0.988
FXR1	P46087-4	P46087	11	0.988
FXR1	Q13045	Q13045	11	0.988
FXR1	Q99714	Q99714	10	0.988
FXR1	P52789	P52789	13	0.988
FXR1	Q7Z6Z7-3	Q7Z6Z7	9	0.988
FXR1	P62330	P62330	7	0.988
FXR1	P30086	P30086	7	0.988
FXR1	P49773	P49773	7	0.988
FXR1	Q9BZZ5-2	Q9BZZ5	10	0.988
FXR1	P17980	P17980	11	0.988
FXR1	P27695	P27695	12	0.988
FXR1	P10515	P10515	15	0.988
FXR1	A0AV96	A0AV96	14	0.988
FXR1	Q9UJZ1	Q9UJZ1	11	0.988
FXR1	Q9BY44	Q9BY44	16	0.988
FXR1	P55084	P55084	14	0.988
FXR1	P12270	P12270	12	0.988
FXR1	P32322	P32322	12	0.988
FXR1	P15559-2	P15559	10	0.988
FXR1	Q9BW04	Q9BW04	11	0.986
FXR1	Q09161	Q09161	12	0.986
FXR1	Q9H0A0	Q9H0A0	12	0.986
FXR1	Q9BYQ3	Q9BYQ3	7	0.986
FXR1	P60953	P60953	7	0.986
FXR1	O75534-2	O75534	10	0.986
FXR1	P67775	P67775	9	0.986
FXR1	O43396	O43396	9	0.986
FXR1	P25789	P25789	8	0.986
FXR1	Q9BQG0	Q9BQG0	13	0.986
FXR1	Q9Y4G6	Q9Y4G6	9	0.986
FXR1	Q9NZB2	Q9NZB2	13	0.986
FXR1	Q8N163	Q8N163	18	0.986
FXR1	Q15021	Q15021	8	0.986
FXR1	Q9P2M7	Q9P2M7	13	0.986
FXR1	P61006	P61006	8	0.986
FXR1	E9PKG1	E9PKG1	13	0.986
FXR1	P00505	P00505	12	0.986
FXR1	P22102	P22102	16	0.986
FXR1	O95782	O95782	17	0.986
FXR1	O00303	O00303	12	0.986
FXR1	J3KN41	J3KN41	10	0.984
FXR1	P50570	P50570	17	0.984
FXR1	P05455	P05455	8	0.984
FXR1	P04899	P04899	9	0.984
FXR1	Q9UJU6	Q9UJU6	11	0.984
FXR1	P13797	P13797	16	0.984
FXR1	Q14126	Q14126	15	0.984
FXR1	Q9Y6E2	Q9Y6E2	13	0.984
FXR1	P62873	P62873	9	0.984
FXR1	A7MAP1	A7MAP1	11	0.984
FXR1	P51648	P51648	16	0.984
FXR1	P00390-3	P00390	9	0.984
FXR1	Q7L1Q6-4	Q7L1Q6	10	0.984
FXR1	P17858	P17858	13	0.984
FXR1	Q10567-3	Q10567	11	0.984
FXR1	Q9UQE7	Q9UQE7	17	0.984
FXR1	P49720	P49720	8	0.982
FXR1	Q9UHD1	Q9UHD1	10	0.982
FXR1	P60468	P60468	4	0.982
FXR1	B4DQH4	B4DQH4	10	0.982
FXR1	P0C7H8	P0C7H8	5	0.982
FXR1	P62993	P62993	7	0.982
FXR1	P30043	P30043	8	0.982
FXR1	Q96KP4	Q96KP4	10	0.982
FXR1	Q7Z739	Q7Z739	12	0.982
FXR1	Q04837	Q04837	5	0.982
FXR1	P63010	P63010	16	0.982
FXR1	P51659	P51659	16	0.982
FXR1	P26583	P26583	9	0.982
FXR1	Q5JW30	Q5JW30	8	0.982
FXR1	Q9Y5K6	Q9Y5K6	14	0.98
FXR1	P46013	P46013	39	0.98
FXR1	Q9NTJ3	Q9NTJ3	11	0.98
FXR1	Q16851-2	Q16851	9	0.98
FXR1	O76021	O76021	12	0.98
FXR1	P59998-3	P59998	9	0.98
FXR1	F5GYN4	F5GYN4	9	0.98
FXR1	P09622	P09622	10	0.98
FXR1	Q9Y3C1	Q9Y3C1	6	0.98
FXR1	P33993	P33993	14	0.98
FXR1	Q92973	Q92973	11	0.98
FXR1	P08754	P08754	10	0.98
FXR1	Q16630-2	Q16630	8	0.98
FXR1	Q14847-2	Q14847	10	0.98
FXR1	Q15758	Q15758	12	0.98
FXR1	Q96CG1	Q96CG1	9	0.978
FXR1	O75367	O75367	11	0.978
FXR1	Q15436	Q15436	12	0.978
FXR1	Q9UQB8-5	Q9UQB8	9	0.978
FXR1	P30566	P30566	8	0.978
FXR1	Q14498-2	Q14498	9	0.978
FXR1	P43246	P43246	9	0.978
FXR1	Q16576	Q16576	10	0.978
FXR1	P62195	P62195	12	0.978
FXR1	Q15008	Q15008	9	0.978
FXR1	P23919	P23919	7	0.978
FXR1	P49591	P49591	10	0.978
FXR1	Q5JS79	Q5JS79	9	0.978
FXR1	P18669	P18669	9	0.978
FXR1	Q5T4S7-3	Q5T4S7	10	0.978
FXR1	Q7L1Q6-3	Q7L1Q6	9	0.978
FXR1	Q9BXJ9	Q9BXJ9	8	0.978
FXR1	O94906	O94906	10	0.978
FXR1	Q16531	Q16531	7	0.978
FXR1	P21291	P21291	6	0.978
FXR1	P28340	P28340	6	0.976
FXR1	Q13155	Q13155	9	0.976
FXR1	Q9UIA9	Q9UIA9	7	0.976
FXR1	P52292	P52292	9	0.976
FXR1	P52788	P52788	8	0.976
FXR1	Q9UHX1-3	Q9UHX1	9	0.976
FXR1	Q9H0D6	Q9H0D6	13	0.976
FXR1	Q92900	Q92900	11	0.976
FXR1	Q96C36	Q96C36	8	0.976
FXR1	P08107-2	P08107	10	0.976
FXR1	Q9BXP5-2	Q9BXP5	10	0.976
FXR1	P61221	P61221	12	0.976
FXR1	P00966	P00966	10	0.974
FXR1	P21817-3	P21817	8	0.974
FXR1	P28288	P28288	12	0.974
FXR1	O94874	O94874	10	0.974
FXR1	P51858	P51858	6	0.974
FXR1	Q13435	Q13435	11	0.974
FXR1	B7Z815	B7Z815	8	0.974
FXR1	O95831	O95831	8	0.974
FXR1	Q5JR08	Q5JR08	9	0.974
FXR1	Q9NRL2	Q9NRL2	5	0.974
FXR1	Q92888-3	Q92888	7	0.974
FXR1	Q92890	Q92890	7	0.972
FXR1	Q9H2G2	Q9H2G2	6	0.972
FXR1	Q03701	Q03701	5	0.972
FXR1	O15371	O15371	9	0.972
FXR1	Q15785	Q15785	8	0.972
FXR1	Q8N1G4	Q8N1G4	9	0.972
FXR1	O95373	O95373	9	0.972
FXR1	O43172	O43172	6	0.972
FXR1	P04183	P04183	7	0.972
FXR1	Q9BVP2	Q9BVP2	12	0.972
FXR1	Q96IU4	Q96IU4	6	0.972
FXR1	O14980	O14980	35	0.972
FXR1	P63167	P63167	5	0.972
FXR1	E2QRB9	E2QRB9	7	0.972
FXR1	Q9NUP9	Q9NUP9	6	0.97
FXR1	P19367-2	P19367	8	0.97
FXR1	Q5W0H4	Q5W0H4	8	0.97
FXR1	O95433	O95433	10	0.97
FXR1	P36542	P36542	7	0.97
FXR1	Q9P258	Q9P258	8	0.97
FXR1	O15042	O15042	7	0.97
FXR1	Q9H3U1	Q9H3U1	10	0.97
FXR1	Q01130	Q01130	6	0.97
FXR1	F6SBX2	F6SBX2	8	0.97
FXR1	P24539	P24539	7	0.97
FXR1	G5E9S1	G5E9S1	62	0.97
FXR1	Q5T6F2	Q5T6F2	6	0.97
FXR1	Q16795	Q16795	9	0.97
FXR1	P22059	P22059	8	0.968
FXR1	Q68DB1	Q68DB1	7	0.968
FXR1	Q9Y4L1	Q9Y4L1	6	0.968
FXR1	P18754	P18754	8	0.968
FXR1	O95239	O95239	6	0.968
FXR1	Q99460	Q99460	11	0.968
FXR1	P62995	P62995	7	0.968
FXR1	O95758-2	O95758	9	0.968
FXR1	P67809	P67809	22	0.968
FXR1	O95486	O95486	6	0.968
FXR1	Q8TE68	Q8TE68	9	0.966
FXR1	Q14573	Q14573	7	0.966
FXR1	Q96QR8	Q96QR8	7	0.966
FXR1	Q02750	Q02750	7	0.966
FXR1	P09110	P09110	10	0.966
FXR1	P49748-3	P49748	7	0.966
FXR1	Q9BYR7	Q9BYR7	3	0.966
FXR1	O43447	O43447	5	0.966
FXR1	P08237	P08237	7	0.966
FXR1	Q8IZP2	Q8IZP2	6	0.966
FXR1	P61019	P61019	6	0.966
FXR1	Q13620-1	Q13620	8	0.966
FXR1	P62333	P62333	9	0.966
FXR1	Q15717	Q15717	9	0.966
FXR1	F8VVQ5	F8VVQ5	8	0.964
FXR1	Q14839-2	Q14839	6	0.964
FXR1	Q9NR45	Q9NR45	8	0.964
FXR1	D3DQV9	D3DQV9	8	0.964
FXR1	P53621	P53621	65	0.964
FXR1	Q9UM54-6	Q9UM54	7	0.964
FXR1	P61769	P61769	4	0.964
FXR1	P01024	P01024	6	0.962
FXR1	Q7Z2W4	Q7Z2W4	6	0.962
FXR1	J3QQX2	J3QQX2	8	0.962
FXR1	B7ZL00	B7ZL00	6	0.962
FXR1	E7ES33	E7ES33	7	0.962
FXR1	Q9HAV4	Q9HAV4	5	0.962
FXR1	Q5TCU3	Q5TCU3	7	0.962
FXR1	Q86XP3	Q86XP3	6	0.962
FXR1	Q13619	Q13619	7	0.962
FXR1	P68400	P68400	8	0.962
FXR1	H7BY36	H7BY36	7	0.962
FXR1	Q53H82	Q53H82	7	0.962
FXR1	O75821	O75821	7	0.96
FXR1	P63151	P63151	6	0.96
FXR1	B4DT67	B4DT67	18	0.96
FXR1	Q13616	Q13616	6	0.96
FXR1	O75874	O75874	9	0.96
FXR1	P16435	P16435	8	0.96
FXR1	Q9Y6M1-1	Q9Y6M1	7	0.96
FXR1	P25788	P25788	6	0.96
FXR1	P35637-2	P35637	9	0.96
FXR1	P31930	P31930	9	0.958
FXR1	K7EIG1	K7EIG1	9	0.958
FXR1	P17812	P17812	7	0.958
FXR1	P10768	P10768	7	0.958
FXR1	Q9Y2Z0	Q9Y2Z0	9	0.958
FXR1	Q99497	Q99497	6	0.958
FXR1	Q01970	Q01970	5	0.958
FXR1	P38117	P38117	6	0.958
FXR1	Q12929	Q12929	8	0.958
FXR1	Q9UNM6	Q9UNM6	8	0.958
FXR1	P30508	P30508	8	0.958
FXR1	Q9Y5L0	Q9Y5L0	6	0.956
FXR1	P48147	P48147	8	0.956
FXR1	Q9UL25	Q9UL25	6	0.956
FXR1	Q9Y678	Q9Y678	51	0.956
FXR1	O15355	O15355	6	0.956
FXR1	P36952	P36952	7	0.956
FXR1	I3NI30	I3NI30	7	0.956
FXR1	Q58FF6	Q58FF6	7	0.956
FXR1	Q9BRZ2	Q9BRZ2	4	0.956
FXR1	F8W845	F8W845	6	0.956
FXR1	P11413-3	P11413	19	0.956
FXR1	P20618	P20618	5	0.956
FXR1	Q8WXI9	Q8WXI9	8	0.956
FXR1	C9J0K6	C9J0K6	6	0.956
FXR1	Q96EP5-2	Q96EP5	7	0.956
FXR1	Q9Y6Q5	Q9Y6Q5	8	0.956
FXR1	C9JEU5	C9JEU5	5	0.956
FXR1	P04040	P04040	5	0.956
FXR1	P50552	P50552	16	0.956
FXR1	P42224	P42224	7	0.954
FXR1	Q5T6W8	Q5T6W8	6	0.954
FXR1	J3KTB5	J3KTB5	7	0.954
FXR1	P35249	P35249	7	0.954
FXR1	O00231	O00231	7	0.954
FXR1	Q9UH17	Q9UH17	7	0.954
FXR1	P11940-2	P11940	7	0.954
FXR1	Q9UBF2	Q9UBF2	5	0.954
FXR1	Q9Y383	Q9Y383	7	0.954
FXR1	B7Z9L0	B7Z9L0	6	0.954
FXR1	Q8TAT6	Q8TAT6	5	0.954
FXR1	P52294	P52294	7	0.954
FXR1	Q9H8H0	Q9H8H0	6	0.954
FXR1	O15498	O15498	5	0.954
FXR1	O94826	O94826	6	0.954
FXR1	P22695	P22695	7	0.952
FXR1	B7Z452	B7Z452	6	0.952
FXR1	Q14139	Q14139	5	0.952
FXR1	Q9UHB9	Q9UHB9	5	0.952
FXR1	H0YF77	H0YF77	6	0.952
FXR1	Q9Y285	Q9Y285	7	0.952
FXR1	P06400	P06400	5	0.952
FXR1	O95777	O95777	3	0.952
FXR1	Q9UJ70	Q9UJ70	6	0.952
FXR1	P02675	P02675	9	0.952
FXR1	Q8TDN6	Q8TDN6	6	0.952
FXR1	P51452	P51452	4	0.952
FXR1	Q5JRI1	Q5JRI1	6	0.952
FXR1	P30085	P30085	5	0.952
FXR1	Q5JWF2	Q5JWF2	6	0.95
FXR1	Q15833-2	Q15833	7	0.95
FXR1	O00232	O00232	8	0.95
FXR1	Q9GZL7	Q9GZL7	5	0.95
FXR1	O75955	O75955	5	0.95
FXR1	Q6UB35	Q6UB35	4	0.95
FXR1	B4DFA2	B4DFA2	6	0.95
FXR1	P55263-3	P55263	4	0.95
FXR1	P20674	P20674	4	0.95
FXR1	Q9NY93	Q9NY93	5	0.95
FXR1	I3L2B0	I3L2B0	7	0.95
FXR1	Q99798	Q99798	6	0.95
FXR1	O75694-2	O75694	5	0.948
FXR1	Q96P70	Q96P70	5	0.948
FXR1	P06730-2	P06730	5	0.948
FXR1	Q92597	Q92597	7	0.948
FXR1	P33991	P33991	8	0.948
FXR1	O95372	O95372	5	0.948
FXR1	P35250	P35250	6	0.948
FXR1	Q9Y5J1	Q9Y5J1	4	0.948
FXR1	P34897	P34897	8	0.948
FXR1	F5H2F9	F5H2F9	7	0.948
FXR1	Q9BYR6	Q9BYR6	3	0.948
FXR1	Q9BUL8	Q9BUL8	4	0.948
FXR1	Q8IZ83	Q8IZ83	5	0.948
FXR1	A4D2Q0	A4D2Q0	5	0.948
FXR1	Q9H7B2	Q9H7B2	6	0.948
FXR1	O95154	O95154	6	0.948
FXR1	P23381	P23381	7	0.946
FXR1	P49790	P49790	5	0.946
FXR1	Q14444	Q14444	6	0.946
FXR1	Q92804-2	Q92804	6	0.946
FXR1	O75396	O75396	4	0.946
FXR1	Q9UG63	Q9UG63	7	0.946
FXR1	Q96SQ9	Q96SQ9	7	0.946
FXR1	Q96HC4	Q96HC4	7	0.946
FXR1	P40763-2	P40763	6	0.946
FXR1	P42167	P42167	25	0.946
FXR1	P37837	P37837	5	0.946
FXR1	G5E9H1	G5E9H1	6	0.946
FXR1	O43237	O43237	5	0.946
FXR1	O75489	O75489	6	0.946
FXR1	Q9BSJ8	Q9BSJ8	4	0.944
FXR1	Q9Y221-2	Q9Y221	5	0.944
FXR1	O95571	O95571	5	0.944
FXR1	Q96RP9	Q96RP9	5	0.944
FXR1	Q9Y5S9	Q9Y5S9	4	0.944
FXR1	Q9NX63	Q9NX63	5	0.944
FXR1	Q9GZS3	Q9GZS3	5	0.944
FXR1	Q9UNX4	Q9UNX4	4	0.944
FXR1	P26358-2	P26358	5	0.944
FXR1	P20339	P20339	4	0.944
FXR1	P41240	P41240	5	0.944
FXR1	M0R1M5	M0R1M5	6	0.944
FXR1	A5YKK6	A5YKK6	6	0.942
FXR1	O00203	O00203	4	0.942
FXR1	P51665	P51665	5	0.942
FXR1	Q9BYG3	Q9BYG3	4	0.942
FXR1	E9PEB5	E9PEB5	5	0.942
FXR1	Q9ULD2	Q9ULD2	4	0.942
FXR1	E9PII3	E9PII3	5	0.942
FXR1	Q7L014	Q7L014	4	0.942
FXR1	Q13813-2	Q13813	28	0.942
FXR1	Q9Y2X7-3	Q9Y2X7	6	0.942
FXR1	P04080	P04080	3	0.942
FXR1	F8VTU2	F8VTU2	5	0.942
FXR1	O76094	O76094	5	0.942
FXR1	Q9Y2L1	Q9Y2L1	4	0.942
FXR1	O43795-2	O43795	6	0.94
FXR1	Q9BVJ7	Q9BVJ7	3	0.94
FXR1	P18283	P18283	4	0.94
FXR1	O75390	O75390	7	0.94
FXR1	P14735	P14735	4	0.94
FXR1	H0YIC4	H0YIC4	5	0.94
FXR1	P33947	P33947	4	0.94
FXR1	Q16401	Q16401	5	0.94
FXR1	P29401-2	P29401	47	0.94
FXR1	Q9Y314	Q9Y314	5	0.938
FXR1	O75312	O75312	6	0.938
FXR1	Q9NWH9	Q9NWH9	4	0.938
FXR1	B4DV00	B4DV00	6	0.938
FXR1	O75477	O75477	6	0.938
FXR1	O43818	O43818	5	0.938
FXR1	O60488	O60488	5	0.938
FXR1	Q9BQ67	Q9BQ67	6	0.938
FXR1	K7EMW4	K7EMW4	5	0.938
FXR1	O95347	O95347	5	0.938
FXR1	E7EP00	E7EP00	5	0.938
FXR1	F2Z2S8	F2Z2S8	6	0.938
FXR1	P55072	P55072	34	0.938
FXR1	Q15637-3	Q15637	5	0.938
FXR1	Q9NUQ8	Q9NUQ8	5	0.938
FXR1	P51398-3	P51398	4	0.936
FXR1	Q96IR7	Q96IR7	4	0.936
FXR1	Q8TC12	Q8TC12	5	0.936
FXR1	F5H7S3	F5H7S3	5	0.936
FXR1	Q96Q25	Q96Q25	5	0.936
FXR1	Q7L5N1	Q7L5N1	4	0.936
FXR1	Q53H96	Q53H96	5	0.936
FXR1	Q9H2U1-2	Q9H2U1	6	0.936
FXR1	F8VYY9	F8VYY9	6	0.936
FXR1	Q14978-3	Q14978	6	0.936
FXR1	Q9H845	Q9H845	5	0.936
FXR1	O95487-2	O95487	4	0.936
FXR1	O15042-2	O15042	4	0.936
FXR1	Q8NBS9	Q8NBS9	5	0.936
FXR1	Q53GQ0	Q53GQ0	5	0.936
FXR1	Q5JR04	Q5JR04	4	0.936
FXR1	P35270	P35270	5	0.936
FXR1	P00491	P00491	6	0.936
FXR1	P55039	P55039	5	0.936
FXR1	Q92979	Q92979	4	0.936
FXR1	O95573	O95573	5	0.936
FXR1	O60841	O60841	4	0.936
FXR1	Q2TAM5	Q2TAM5	4	0.936
FXR1	Q9UBM7	Q9UBM7	5	0.934
FXR1	P42167-2	P42167	4	0.934
FXR1	Q14320	Q14320	6	0.934
FXR1	Q06323	Q06323	5	0.934
FXR1	Q9NRX1	Q9NRX1	4	0.934
FXR1	Q16698	Q16698	5	0.934
FXR1	P09012	P09012	5	0.934
FXR1	Q9Y2S7	Q9Y2S7	4	0.934
FXR1	H0YMZ1	H0YMZ1	5	0.934
FXR1	Q9UKK3	Q9UKK3	5	0.934
FXR1	O60231	O60231	6	0.934
FXR1	B4DW73	B4DW73	5	0.934
FXR1	F5H4X1	F5H4X1	5	0.934
FXR1	Q9UHR4	Q9UHR4	4	0.934
FXR1	Q15269	Q15269	4	0.934
FXR1	Q8TDB6	Q8TDB6	4	0.934
FXR1	Q8WXX5	Q8WXX5	4	0.932
FXR1	Q96TA1	Q96TA1	6	0.932
FXR1	P78527	P78527	197	0.932
FXR1	Q5TB20	Q5TB20	6	0.932
FXR1	Q5H9R7-5	Q5H9R7	5	0.932
FXR1	Q5SSJ5	Q5SSJ5	4	0.932
FXR1	P61758	P61758	4	0.932
FXR1	E9PBG7	E9PBG7	4	0.932
FXR1	O15160	O15160	5	0.932
FXR1	P39687	P39687	4	0.932
FXR1	Q9Y277-2	Q9Y277	5	0.932
FXR1	E9PRI4	E9PRI4	5	0.932
FXR1	P28331-2	P28331	5	0.932
FXR1	Q6XQN6	Q6XQN6	5	0.932
FXR1	Q5SX87	Q5SX87	27	0.932
FXR1	Q8IZW8	Q8IZW8	4	0.932
FXR1	P30419	P30419	6	0.932
FXR1	Q12792-4	Q12792	5	0.932
FXR1	P14550	P14550	4	0.932
FXR1	P22676	P22676	5	0.932
FXR1	P61619	P61619	6	0.932
FXR1	Q9UJS0-2	Q9UJS0	7	0.93
FXR1	Q8TE77	Q8TE77	4	0.93
FXR1	Q5T8N1	Q5T8N1	5	0.93
FXR1	Q13126	Q13126	5	0.93
FXR1	Q5T2B5	Q5T2B5	5	0.93
FXR1	I3L0H8	I3L0H8	4	0.93
FXR1	P51572	P51572	5	0.93
FXR1	P16989-3	P16989	5	0.93
FXR1	P19525	P19525	6	0.93
FXR1	P11172	P11172	5	0.93
FXR1	Q8N3E9	Q8N3E9	5	0.93
FXR1	P53004	P53004	4	0.93
FXR1	Q9H089	Q9H089	7	0.93
FXR1	E7EP32	E7EP32	5	0.93
FXR1	Q8N6H7	Q8N6H7	5	0.928
FXR1	O43660-2	O43660	5	0.928
FXR1	Q9BU76	Q9BU76	4	0.928
FXR1	P49902	P49902	3	0.928
FXR1	Q8WZ42-11	Q8WZ42	5	0.928
FXR1	P40925	P40925	7	0.928
FXR1	Q9BPX3	Q9BPX3	4	0.928
FXR1	P41252	P41252	32	0.928
FXR1	A0FGR8-6	A0FGR8	5	0.928
FXR1	F8VZJ2	F8VZJ2	5	0.928
FXR1	P55786	P55786	4	0.928
FXR1	E9PCP3	E9PCP3	4	0.928
FXR1	Q03013	Q03013	4	0.928
FXR1	Q96D46	Q96D46	5	0.928
FXR1	G8JLD5	G8JLD5	5	0.928
FXR1	P21283	P21283	5	0.926
FXR1	Q8TEX9	Q8TEX9	4	0.926
FXR1	J3KQG6	J3KQG6	5	0.926
FXR1	P55735-2	P55735	5	0.926
FXR1	Q9Y263	Q9Y263	4	0.926
FXR1	Q7RTR2	Q7RTR2	3	0.926
FXR1	P61158	P61158	20	0.926
FXR1	Q9UBE0	Q9UBE0	5	0.926
FXR1	P45973	P45973	4	0.926
FXR1	Q9BYJ9	Q9BYJ9	5	0.926
FXR1	A0AV56	A0AV56	4	0.926
FXR1	C9JM19	C9JM19	5	0.926
FXR1	Q5T3Q7	Q5T3Q7	5	0.926
FXR1	E9PBK7	E9PBK7	4	0.926
FXR1	Q9Y520-2	Q9Y520	5	0.926
FXR1	Q15691	Q15691	5	0.924
FXR1	Q8NFH4	Q8NFH4	5	0.924
FXR1	Q15738	Q15738	4	0.924
FXR1	Q96DI7	Q96DI7	4	0.924
FXR1	Q86UE4	Q86UE4	4	0.924
FXR1	Q92882	Q92882	4	0.924
FXR1	P49756	P49756	3	0.924
FXR1	Q13243	Q13243	4	0.924
FXR1	Q92572	Q92572	4	0.924
FXR1	P00352	P00352	19	0.924
FXR1	O00762	O00762	4	0.924
FXR1	O75531	O75531	3	0.924
FXR1	P35244	P35244	3	0.924
FXR1	Q9GZR7	Q9GZR7	4	0.924
FXR1	P49189	P49189	3	0.924
FXR1	Q6PI48	Q6PI48	4	0.924
FXR1	F5H668	F5H668	5	0.924
FXR1	P53618	P53618	35	0.924
FXR1	Q9H6T0	Q9H6T0	4	0.924
FXR1	Q5T6H7	Q5T6H7	4	0.924
FXR1	Q5T0H9	Q5T0H9	4	0.922
FXR1	Q16762	Q16762	4	0.922
FXR1	Q13057	Q13057	7	0.922
FXR1	P31153	P31153	5	0.922
FXR1	Q9UBB4	Q9UBB4	4	0.922
FXR1	Q9NQW6	Q9NQW6	4	0.922
FXR1	P27694	P27694	4	0.922
FXR1	P28074	P28074	4	0.922
FXR1	Q9BWF3	Q9BWF3	5	0.922
FXR1	Q9NZN4	Q9NZN4	4	0.922
FXR1	B4DTG6	B4DTG6	4	0.922
FXR1	P35914	P35914	4	0.922
FXR1	Q92615	Q92615	4	0.922
FXR1	Q7L2H7	Q7L2H7	5	0.922
FXR1	O95747	O95747	3	0.92
FXR1	B3KP96	B3KP96	4	0.92
FXR1	B8ZZ10	B8ZZ10	4	0.92
FXR1	Q14344	Q14344	5	0.92
FXR1	P35998	P35998	17	0.92
FXR1	Q9UD71-2	Q9UD71	5	0.92
FXR1	D6RGI3	D6RGI3	4	0.92
FXR1	Q9UNS2	Q9UNS2	4	0.92
FXR1	P46063	P46063	5	0.92
FXR1	J3QS36	J3QS36	5	0.92
FXR1	P35659-2	P35659	4	0.92
FXR1	P37059	P37059	4	0.92
FXR1	Q13242	Q13242	3	0.92
FXR1	Q9BX40	Q9BX40	5	0.92
FXR1	Q9BRA2	Q9BRA2	3	0.92
FXR1	Q9Y333	Q9Y333	2	0.92
FXR1	P46977	P46977	3	0.92
FXR1	P30084	P30084	5	0.92
FXR1	Q14165	Q14165	4	0.92
FXR1	O75569-3	O75569	4	0.918
FXR1	Q13011	Q13011	5	0.918
FXR1	Q4G0F5	Q4G0F5	4	0.918
FXR1	Q7L2E3-3	Q7L2E3	4	0.918
FXR1	Q92878-3	Q92878	4	0.918
FXR1	P50395-2	P50395	4	0.918
FXR1	Q504U8	Q504U8	4	0.918
FXR1	Q8WU90	Q8WU90	4	0.918
FXR1	Q00577	Q00577	5	0.918
FXR1	Q9Y5X1	Q9Y5X1	3	0.916
FXR1	Q96P11-4	Q96P11	4	0.916
FXR1	Q14232	Q14232	3	0.916
FXR1	Q9BTE9	Q9BTE9	5	0.916
FXR1	Q99848	Q99848	4	0.916
FXR1	P50454	P50454	5	0.916
FXR1	Q8NI36	Q8NI36	3	0.916
FXR1	Q9UDW1	Q9UDW1	2	0.916
FXR1	O00764	O00764	4	0.916
FXR1	Q9BRJ6	Q9BRJ6	3	0.916
FXR1	Q04760	Q04760	3	0.916
FXR1	H0YK83	H0YK83	4	0.916
FXR1	H0YJQ3	H0YJQ3	4	0.916
FXR1	B8ZZ47	B8ZZ47	4	0.916
FXR1	G3V2S9	G3V2S9	5	0.916
FXR1	Q96B97-2	Q96B97	3	0.916
FXR1	Q9BRG1	Q9BRG1	3	0.916
FXR1	P20042	P20042	13	0.914
FXR1	Q08752	Q08752	4	0.914
FXR1	Q96KB5	Q96KB5	4	0.914
FXR1	Q9H307	Q9H307	4	0.914
FXR1	Q5TA02	Q5TA02	4	0.914
FXR1	Q13951	Q13951	3	0.914
FXR1	B2RPK0	B2RPK0	3	0.914
FXR1	Q9HC38-2	Q9HC38	4	0.914
FXR1	P43034	P43034	6	0.914
FXR1	O00154-4	O00154	4	0.914
FXR1	B7Z254	B7Z254	22	0.914
FXR1	E9PPC8	E9PPC8	4	0.914
FXR1	Q9Y376	Q9Y376	4	0.914
FXR1	F5H4G7	F5H4G7	5	0.914
FXR1	Q13671-2	Q13671	4	0.914
FXR1	D6RHZ5	D6RHZ5	3	0.912
FXR1	E7ESL0	E7ESL0	4	0.912
FXR1	A8MY36	A8MY36	3	0.912
FXR1	J3KNB1	J3KNB1	3	0.912
FXR1	Q15102	Q15102	4	0.912
FXR1	P07741-2	P07741	4	0.912
FXR1	H3BNZ1	H3BNZ1	4	0.912
FXR1	Q969X6-2	Q969X6	4	0.91
FXR1	B4DJ96	B4DJ96	4	0.91
FXR1	A6NMH6	A6NMH6	3	0.91
FXR1	O00186	O00186	4	0.91
FXR1	P28838	P28838	4	0.91
FXR1	P09960	P09960	4	0.91
FXR1	P31937	P31937	4	0.91
FXR1	Q09666	Q09666	286	0.91
FXR1	O00629	O00629	4	0.91
FXR1	O15305	O15305	4	0.91
FXR1	Q6RFH5	Q6RFH5	4	0.91
FXR1	Q15126	Q15126	3	0.91
FXR1	Q4JM47	Q4JM47	17	0.91
FXR1	E7ESI2	E7ESI2	4	0.91
FXR1	P26440	P26440	3	0.91
FXR1	P57740	P57740	4	0.91
FXR1	P68402	P68402	4	0.91
FXR1	Q08J23-2	Q08J23	4	0.91
FXR1	Q9H444	Q9H444	4	0.91
FXR1	F5GX23	F5GX23	4	0.908
FXR1	Q9ULZ3-3	Q9ULZ3	4	0.908
FXR1	Q5U4A5	Q5U4A5	4	0.908
FXR1	O43150	O43150	3	0.908
FXR1	Q59FY4	Q59FY4	4	0.908
FXR1	P61964	P61964	2	0.908
FXR1	F5GY65	F5GY65	4	0.908
FXR1	Q9UEW8	Q9UEW8	3	0.908
FXR1	Q96RS6-3	Q96RS6	3	0.908
FXR1	Q15020	Q15020	3	0.908
FXR1	Q13724	Q13724	3	0.908
FXR1	O95456-2	O95456	3	0.906
FXR1	P78318	P78318	4	0.906
FXR1	F8VV71	F8VV71	4	0.906
FXR1	Q9NZ01	Q9NZ01	4	0.906
FXR1	Q92614-2	Q92614	4	0.906
FXR1	C9IZQ1	C9IZQ1	3	0.906
FXR1	Q2VIR3	Q2VIR3	3	0.906
FXR1	E7EV56	E7EV56	3	0.906
FXR1	J3KNE5	J3KNE5	4	0.906
FXR1	P40222	P40222	3	0.906
FXR1	P53041	P53041	3	0.906
FXR1	Q8NBW7	Q8NBW7	3	0.906
FXR1	Q9BSJ2-4	Q9BSJ2	4	0.906
FXR1	Q14692	Q14692	3	0.906
FXR1	Q8IY81	Q8IY81	3	0.906
FXR1	Q9UK45	Q9UK45	2	0.904
FXR1	E7ENU4	E7ENU4	4	0.904
FXR1	Q9H8V3-2	Q9H8V3	2	0.904
FXR1	E7ETB7	E7ETB7	3	0.904
FXR1	J3QS62	J3QS62	4	0.904
FXR1	Q10713	Q10713	3	0.904
FXR1	Q13158	Q13158	3	0.904
FXR1	P50213	P50213	3	0.904
FXR1	P49755	P49755	3	0.904
FXR1	F5GYC4	F5GYC4	4	0.904
FXR1	Q9BZK7	Q9BZK7	5	0.904
FXR1	G5E9W7	G5E9W7	3	0.902
FXR1	Q53GS9	Q53GS9	3	0.902
FXR1	P51451	P51451	3	0.902
FXR1	Q9BW19	Q9BW19	3	0.902
FXR1	E9PFW3	E9PFW3	3	0.902
FXR1	F5GYQ1	F5GYQ1	4	0.902
FXR1	Q01082-2	Q01082	3	0.902
FXR1	O00487	O00487	3	0.902
FXR1	J3KPE3	J3KPE3	3	0.902
FXR1	Q9NR31	Q9NR31	2	0.902
FXR1	Q9NZL4	Q9NZL4	3	0.902
FXR1	Q9Y315	Q9Y315	3	0.902
FXR1	Q5R2V8	Q5R2V8	3	0.902
FXR1	F8VXY3	F8VXY3	3	0.902
FXR1	Q9UL46	Q9UL46	3	0.902
FXR1	Q9NUQ9	Q9NUQ9	4	0.9
FXR1	E9PKH6	E9PKH6	3	0.9
FXR1	Q15370-2	Q15370	3	0.9
FXR1	P56385	P56385	2	0.9
FXR1	F8VR34	F8VR34	3	0.9
FXR1	Q5VU77	Q5VU77	4	0.9
FXR1	A6NKH4	A6NKH4	3	0.9
FXR1	J3KPW7	J3KPW7	3	0.9
FXR1	O43592	O43592	3	0.9
FXR1	E5RHT6	E5RHT6	4	0.9
FXR1	E7ET75	E7ET75	4	0.9
FXR1	Q12996	Q12996	3	0.9
FXR1	C9J9W2	C9J9W2	4	0.9
FXR1	O15226	O15226	3	0.9
FXR1	Q14694-3	Q14694	4	0.9
FXR1	H7C040	H7C040	4	0.9
FXR1	P19224	P19224	3	0.9
FXR1	Q8NBQ5	Q8NBQ5	4	0.9
FXR1	Q96T88	Q96T88	3	0.898
FXR1	F5H8B1	F5H8B1	4	0.898
FXR1	Q9UDT6	Q9UDT6	3	0.898
FXR1	Q96EE3-1	Q96EE3	3	0.898
FXR1	C9JW96	C9JW96	3	0.898
FXR1	E9PQD7	E9PQD7	5	0.898
FXR1	A8MX09	A8MX09	3	0.898
FXR1	Q16543	Q16543	4	0.898
FXR1	P12931	P12931	3	0.898
FXR1	H7C1K5	H7C1K5	4	0.898
FXR1	P05026	P05026	3	0.898
FXR1	Q9Y4P3	Q9Y4P3	4	0.898
FXR1	Q9NYF8-2	Q9NYF8	3	0.898
FXR1	P57088	P57088	3	0.896
FXR1	P11171-2	P11171	3	0.896
FXR1	E7EVX8	E7EVX8	4	0.896
FXR1	P62633	P62633	3	0.896
FXR1	Q9UI10-2	Q9UI10	3	0.896
FXR1	Q8TCS8	Q8TCS8	3	0.896
FXR1	Q96RL7-3	Q96RL7	3	0.896
FXR1	P46060	P46060	3	0.896
FXR1	B0V044	B0V044	4	0.896
FXR1	O75400-3	O75400	3	0.896
FXR1	Q8NBY1	Q8NBY1	3	0.896
FXR1	Q9Y5X3	Q9Y5X3	3	0.896
FXR1	H0YDC5	H0YDC5	3	0.894
FXR1	Q8IUC1	Q8IUC1	3	0.894
FXR1	M0R0P1	M0R0P1	3	0.894
FXR1	Q96JY6-3	Q96JY6	3	0.894
FXR1	P19388	P19388	3	0.894
FXR1	Q7RTV0	Q7RTV0	2	0.894
FXR1	Q9BV40	Q9BV40	2	0.894
FXR1	O75964	O75964	2	0.894
FXR1	B5MD17	B5MD17	3	0.894
FXR1	O00264	O00264	3	0.894
FXR1	E9PF18	E9PF18	4	0.894
FXR1	G5EA06	G5EA06	3	0.894
FXR1	Q9P013	Q9P013	3	0.894
FXR1	Q32MZ4-3	Q32MZ4	3	0.894
FXR1	Q9P1A2	Q9P1A2	3	0.892
FXR1	B0UXQ1	B0UXQ1	3	0.892
FXR1	E7ERJ7	E7ERJ7	3	0.892
FXR1	Q969Z0	Q969Z0	3	0.892
FXR1	H0YNW5	H0YNW5	4	0.892
FXR1	P55809	P55809	3	0.892
FXR1	P48730-2	P48730	3	0.892
FXR1	Q01780-2	Q01780	3	0.892
FXR1	G3XAA9	G3XAA9	3	0.892
FXR1	Q9Y2K7-2	Q9Y2K7	3	0.89
FXR1	P41227	P41227	3	0.89
FXR1	Q9UHD8-3	Q9UHD8	3	0.89
FXR1	O75348	O75348	2	0.89
FXR1	Q9ULC5-3	Q9ULC5	3	0.89
FXR1	F5GXS7	F5GXS7	2	0.89
FXR1	P09661	P09661	4	0.89
FXR1	Q13045-2	Q13045	2	0.89
FXR1	Q9UKZ9	Q9UKZ9	4	0.89
FXR1	O75822	O75822	3	0.89
FXR1	Q9NS87-2	Q9NS87	3	0.89
FXR1	Q13501-2	Q13501	3	0.89
FXR1	M0R0F0	M0R0F0	3	0.89
FXR1	O00625	O00625	3	0.888
FXR1	Q9Y3B4	Q9Y3B4	2	0.888
FXR1	Q9BYR4	Q9BYR4	2	0.888
FXR1	P18206	P18206	41	0.888
FXR1	O94817	O94817	2	0.888
FXR1	Q12874	Q12874	3	0.888
FXR1	Q9NQP4	Q9NQP4	2	0.888
FXR1	Q5JTH9-3	Q5JTH9	4	0.888
FXR1	P53007	P53007	3	0.888
FXR1	Q96T76-9	Q96T76	3	0.888
FXR1	G3V4X8	G3V4X8	3	0.888
FXR1	Q6PKG0	Q6PKG0	3	0.888
FXR1	E9PR16	E9PR16	2	0.888
FXR1	Q9Y570-2	Q9Y570	3	0.886
FXR1	P02790	P02790	3	0.886
FXR1	P48556	P48556	3	0.886
FXR1	Q9BV86	Q9BV86	2	0.886
FXR1	F8W6P5	F8W6P5	3	0.886
FXR1	Q9UI33-3	Q9UI33	2	0.886
FXR1	E7EQN5	E7EQN5	3	0.886
FXR1	Q08170	Q08170	3	0.886
FXR1	P00403	P00403	3	0.886
FXR1	O15511	O15511	2	0.886
FXR1	Q9Y6C9	Q9Y6C9	2	0.886
FXR1	Q9Y265	Q9Y265	30	0.886
FXR1	P30520	P30520	4	0.886
FXR1	Q9H4G0-3	Q9H4G0	2	0.886
FXR1	Q8N766-3	Q8N766	3	0.886
FXR1	O60506-2	O60506	2	0.886
FXR1	B4DWZ0	B4DWZ0	2	0.884
FXR1	Q5JYR4	Q5JYR4	18	0.884
FXR1	Q9HCK5	Q9HCK5	3	0.884
FXR1	P61224-3	P61224	3	0.884
FXR1	F5GZS6	F5GZS6	3	0.884
FXR1	E7ET59	E7ET59	3	0.884
FXR1	M0R0N4	M0R0N4	3	0.884
FXR1	K7ENP3	K7ENP3	2	0.884
FXR1	Q9NQR4	Q9NQR4	3	0.884
FXR1	Q5QPP3	Q5QPP3	3	0.884
FXR1	Q5T9B7	Q5T9B7	3	0.884
FXR1	Q658Y4	Q658Y4	3	0.882
FXR1	Q9Y2A7	Q9Y2A7	3	0.882
FXR1	Q15392	Q15392	3	0.882
FXR1	Q9NRX4	Q9NRX4	2	0.882
FXR1	Q14192	Q14192	3	0.882
FXR1	K4DIE0	K4DIE0	3	0.882
FXR1	C9J050	C9J050	3	0.882
FXR1	P05091	P05091	4	0.882
FXR1	P36551	P36551	3	0.882
FXR1	Q9H2U2-2	Q9H2U2	4	0.88
FXR1	Q13895	Q13895	3	0.88
FXR1	Q99816	Q99816	3	0.88
FXR1	Q0VAN0	Q0VAN0	3	0.88
FXR1	P29992	P29992	3	0.88
FXR1	P41567	P41567	2	0.88
FXR1	Q9NRF9	Q9NRF9	2	0.88
FXR1	E9PRQ6	E9PRQ6	2	0.878
FXR1	H3BS70	H3BS70	2	0.878
FXR1	Q9UQN3	Q9UQN3	2	0.878
FXR1	P51571	P51571	3	0.878
FXR1	J3KNF8	J3KNF8	2	0.878
FXR1	Q5SWX3	Q5SWX3	2	0.878
FXR1	O60271-9	O60271	2	0.878
FXR1	I3L2P8	I3L2P8	3	0.878
FXR1	Q9H3K6	Q9H3K6	2	0.878
FXR1	P27797	P27797	3	0.878
FXR1	J9JID1	J9JID1	3	0.878
FXR1	Q9NWT1	Q9NWT1	3	0.878
FXR1	Q15067-2	Q15067	2	0.878
FXR1	B4DUA9	B4DUA9	3	0.878
FXR1	Q8NCA5	Q8NCA5	3	0.878
FXR1	P20073-2	P20073	2	0.878
FXR1	Q96HW7-2	Q96HW7	2	0.876
FXR1	Q6DD88	Q6DD88	3	0.876
FXR1	H7C4B7	H7C4B7	3	0.876
FXR1	P49770	P49770	3	0.876
FXR1	Q5HYI8	Q5HYI8	2	0.876
FXR1	Q9BUL9	Q9BUL9	2	0.876
FXR1	F5H1N1	F5H1N1	2	0.876
FXR1	Q9H6S3	Q9H6S3	2	0.876
FXR1	Q13144	Q13144	3	0.876
FXR1	B7Z972	B7Z972	3	0.876
FXR1	Q86VI3	Q86VI3	3	0.876
FXR1	F8W0P7	F8W0P7	2	0.876
FXR1	Q9NVI1-1	Q9NVI1	3	0.876
FXR1	Q6ZWP6	Q6ZWP6	3	0.876
FXR1	K7EK45	K7EK45	2	0.876
FXR1	P40306	P40306	3	0.874
FXR1	Q7Z7K6	Q7Z7K6	3	0.874
FXR1	P08579	P08579	3	0.874
FXR1	Q99471	Q99471	2	0.874
FXR1	P37198	P37198	2	0.874
FXR1	O95999	O95999	2	0.874
FXR1	B4E1E9	B4E1E9	2	0.874
FXR1	Q9UII2	Q9UII2	2	0.874
FXR1	Q96L35	Q96L35	2	0.874
FXR1	Q86WX3	Q86WX3	2	0.874
FXR1	Q14CX7	Q14CX7	3	0.874
FXR1	Q8NI27	Q8NI27	3	0.874
FXR1	Q9HCU5	Q9HCU5	2	0.874
FXR1	O75340	O75340	3	0.874
FXR1	P21953	P21953	2	0.874
FXR1	F5H6Y7	F5H6Y7	3	0.874
FXR1	Q9Y3A4	Q9Y3A4	2	0.872
FXR1	Q9BVI4	Q9BVI4	2	0.872
FXR1	Q15654	Q15654	2	0.872
FXR1	E7ETB3	E7ETB3	2	0.872
FXR1	Q8IV36-3	Q8IV36	2	0.872
FXR1	B9A067	B9A067	3	0.872
FXR1	P00492	P00492	2	0.872
FXR1	Q9NX58	Q9NX58	2	0.872
FXR1	P17612	P17612	3	0.872
FXR1	Q9HAV0	Q9HAV0	3	0.872
FXR1	P41223	P41223	2	0.872
FXR1	P30049	P30049	2	0.872
FXR1	Q9NT62	Q9NT62	3	0.872
FXR1	Q8IWX8	Q8IWX8	3	0.872
FXR1	Q9UHV9	Q9UHV9	2	0.872
FXR1	Q92973-3	Q92973	2	0.872
FXR1	P62136-2	P62136	3	0.87
FXR1	Q9NQ88	Q9NQ88	3	0.87
FXR1	Q15291	Q15291	3	0.87
FXR1	Q9BRP4-2	Q9BRP4	2	0.87
FXR1	Q99986	Q99986	2	0.87
FXR1	B4DS61	B4DS61	2	0.87
FXR1	Q9P2R3-2	Q9P2R3	2	0.87
FXR1	Q14624-2	Q14624	2	0.87
FXR1	Q6P587-3	Q6P587	2	0.87
FXR1	O43395	O43395	2	0.87
FXR1	Q9UI15	Q9UI15	2	0.87
FXR1	P49643	P49643	2	0.868
FXR1	O75439	O75439	2	0.868
FXR1	E9PJA7	E9PJA7	3	0.868
FXR1	P15374	P15374	3	0.868
FXR1	Q16539-3	Q16539	2	0.868
FXR1	Q13131	Q13131	2	0.868
FXR1	H7C3I1	H7C3I1	2	0.868
FXR1	H7C2P7	H7C2P7	2	0.868
FXR1	Q13573	Q13573	2	0.868
FXR1	Q9UKY7	Q9UKY7	2	0.868
FXR1	Q96CW5	Q96CW5	2	0.868
FXR1	P62837	P62837	2	0.868
FXR1	P30536	P30536	2	0.868
FXR1	B4E0R6	B4E0R6	2	0.868
FXR1	Q9UKF6	Q9UKF6	2	0.868
FXR1	E5KLK1	E5KLK1	2	0.866
FXR1	F8VVA7	F8VVA7	2	0.866
FXR1	O75131	O75131	20	0.866
FXR1	F5H3Y3	F5H3Y3	2	0.866
FXR1	O00231-2	O00231	2	0.866
FXR1	P40938	P40938	3	0.866
FXR1	P43897	P43897	2	0.866
FXR1	P0DI81	P0DI81	2	0.866
FXR1	Q6NUQ4	Q6NUQ4	3	0.866
FXR1	Q9NWV4	Q9NWV4	2	0.866
FXR1	Q6JUT2	Q6JUT2	2	0.866
FXR1	P37108	P37108	2	0.866
FXR1	J3KNL4	J3KNL4	2	0.866
FXR1	F5H4H2	F5H4H2	3	0.866
FXR1	Q9NS86	Q9NS86	2	0.866
FXR1	K7EK18	K7EK18	2	0.866
FXR1	K7ELF1	K7ELF1	2	0.866
FXR1	Q16880	Q16880	2	0.864
FXR1	E9PBJ5	E9PBJ5	2	0.864
FXR1	Q13206	Q13206	2	0.864
FXR1	D6W5Y5	D6W5Y5	2	0.864
FXR1	P98179	P98179	2	0.864
FXR1	H7C292	H7C292	2	0.864
FXR1	Q96GG9	Q96GG9	3	0.864
FXR1	C9JCA9	C9JCA9	2	0.864
FXR1	Q5T8P6-3	Q5T8P6	2	0.864
FXR1	P18031	P18031	2	0.864
FXR1	Q7Z6H8	Q7Z6H8	2	0.864
FXR1	E9PJI4	E9PJI4	2	0.864
FXR1	H0YJ74	H0YJ74	2	0.864
FXR1	P61077-3	P61077	2	0.864
FXR1	O75251	O75251	2	0.864
FXR1	Q8WYA6-2	Q8WYA6	2	0.862
FXR1	H0YAK1	H0YAK1	3	0.862
FXR1	D6RBD7	D6RBD7	2	0.862
FXR1	P49411	P49411	28	0.862
FXR1	Q5JVF3-3	Q5JVF3	2	0.862
FXR1	B1AL05	B1AL05	2	0.862
FXR1	F8VPJ2	F8VPJ2	2	0.862
FXR1	P27816-6	P27816	2	0.862
FXR1	Q9UIV1-2	Q9UIV1	2	0.862
FXR1	Q8N8N7	Q8N8N7	2	0.862
FXR1	Q9NQG5	Q9NQG5	3	0.862
FXR1	Q8WUK0	Q8WUK0	2	0.862
FXR1	K7ES59	K7ES59	2	0.862
FXR1	Q9P035	Q9P035	2	0.86
FXR1	D6RF83	D6RF83	2	0.86
FXR1	P61009	P61009	2	0.86
FXR1	Q96A33	Q96A33	2	0.86
FXR1	Q9NPJ8-3	Q9NPJ8	2	0.86
FXR1	Q96P20-3	Q96P20	2	0.86
FXR1	Q9NXG2	Q9NXG2	2	0.86
FXR1	D6RAY7	D6RAY7	3	0.86
FXR1	P25787	P25787	3	0.86
FXR1	Q9Y4W2-4	Q9Y4W2	2	0.86
FXR1	F2Z2V0	F2Z2V0	16	0.86
FXR1	Q5TBG7	Q5TBG7	2	0.86
FXR1	B7Z9L2	B7Z9L2	2	0.86
FXR1	Q6WKZ4-3	Q6WKZ4	2	0.86
FXR1	O15195-2	O15195	2	0.86
FXR1	O75367-3	O75367	2	0.86
FXR1	Q9NUQ7	Q9NUQ7	2	0.86
FXR1	Q9NPD8	Q9NPD8	2	0.86
FXR1	P30040	P30040	2	0.86
FXR1	F5H5M9	F5H5M9	2	0.858
FXR1	O75691	O75691	5	0.858
FXR1	P17480-2	P17480	2	0.858
FXR1	F5GY56	F5GY56	2	0.858
FXR1	F5H1L6	F5H1L6	3	0.858
FXR1	Q8NE86	Q8NE86	2	0.858
FXR1	Q9NTZ6	Q9NTZ6	3	0.858
FXR1	Q9UNF0	Q9UNF0	2	0.858
FXR1	Q5TFE4	Q5TFE4	2	0.858
FXR1	Q14669-3	Q14669	2	0.858
FXR1	Q6N069-3	Q6N069	2	0.858
FXR1	Q92905	Q92905	2	0.858
FXR1	Q96FZ2	Q96FZ2	2	0.858
FXR1	P52735-3	P52735	2	0.858
FXR1	O60573	O60573	2	0.858
FXR1	Q5RKV6	Q5RKV6	2	0.858
FXR1	P35222	P35222	31	0.858
FXR1	Q15005	Q15005	2	0.858
FXR1	P01008	P01008	2	0.856
FXR1	P78527-2	P78527	2	0.856
FXR1	Q8NF91-4	Q8NF91	2	0.856
FXR1	Q3LXA3	Q3LXA3	2	0.856
FXR1	Q01085-2	Q01085	2	0.856
FXR1	Q86X55	Q86X55	2	0.856
FXR1	J3QT46	J3QT46	2	0.856
FXR1	Q86TB9-4	Q86TB9	2	0.856
FXR1	F5H3P5	F5H3P5	2	0.856
FXR1	Q96I99	Q96I99	2	0.856
FXR1	E9PKU7	E9PKU7	2	0.856
FXR1	P98175-3	P98175	2	0.856
FXR1	Q9H061	Q9H061	2	0.856
FXR1	Q9NZZ3	Q9NZZ3	2	0.856
FXR1	B4DWT1	B4DWT1	2	0.856
FXR1	Q07065	Q07065	2	0.854
FXR1	D6REM6	D6REM6	2	0.854
FXR1	Q5VV89	Q5VV89	2	0.854
FXR1	Q9NV35	Q9NV35	2	0.854
FXR1	P38432	P38432	2	0.854
FXR1	P53597	P53597	2	0.854
FXR1	E1B6W5	E1B6W5	2	0.854
FXR1	Q13163-2	Q13163	2	0.854
FXR1	Q15645	Q15645	2	0.854
FXR1	P46940	P46940	91	0.854
FXR1	Q5LJA9	Q5LJA9	2	0.854
FXR1	H3BS72	H3BS72	2	0.854
FXR1	J3KQE5	J3KQE5	2	0.854
FXR1	F8VP63	F8VP63	2	0.854
FXR1	J3KPQ3	J3KPQ3	2	0.854
FXR1	B7Z7M6	B7Z7M6	2	0.854
FXR1	E9PFR3	E9PFR3	2	0.852
FXR1	Q96C86	Q96C86	2	0.852
FXR1	Q9UI12-2	Q9UI12	2	0.852
FXR1	Q9HA64	Q9HA64	2	0.852
FXR1	Q13907	Q13907	2	0.852
FXR1	Q9Y6Y8-2	Q9Y6Y8	2	0.852
FXR1	Q5VV41-2	Q5VV41	2	0.852
FXR1	P34896-2	P34896	2	0.852
FXR1	Q9NYT0	Q9NYT0	2	0.852
FXR1	E7ETU7	E7ETU7	2	0.852
FXR1	O95456	O95456	2	0.852
FXR1	O60493	O60493	2	0.852
FXR1	Q9Y6A5	Q9Y6A5	2	0.852
FXR1	O14617-5	O14617	2	0.852
FXR1	Q5JRG1	Q5JRG1	2	0.852
FXR1	F5H345	F5H345	2	0.852
FXR1	Q15006	Q15006	2	0.852
FXR1	Q7Z5L9	Q7Z5L9	2	0.85
FXR1	Q9NVU7	Q9NVU7	2	0.85
FXR1	K7ESI9	K7ESI9	2	0.85
FXR1	Q9H190	Q9H190	2	0.85
FXR1	E9PI39	E9PI39	3	0.85
FXR1	Q3ZCQ8-2	Q3ZCQ8	2	0.85
FXR1	F5GX77	F5GX77	3	0.85
FXR1	H3BQD9	H3BQD9	2	0.85
FXR1	E7EVY0	E7EVY0	2	0.85
FXR1	E9PM69	E9PM69	2	0.85
FXR1	Q9BRP8	Q9BRP8	2	0.85
FXR1	Q9BVG4	Q9BVG4	2	0.85
FXR1	Q8WW12	Q8WW12	2	0.85
FXR1	E7EX44	E7EX44	2	0.85
FXR1	J3KPV7	J3KPV7	2	0.85
FXR1	A3KFL2	A3KFL2	2	0.85
FXR1	Q13217	Q13217	2	0.85
FXR1	B7ZAX5	B7ZAX5	2	0.85
FXR1	Q86X76-2	Q86X76	2	0.85
FXR1	Q8TCJ2	Q8TCJ2	3	0.848
FXR1	Q07960	Q07960	3	0.848
FXR1	F8VZQ9	F8VZQ9	2	0.848
FXR1	Q92917	Q92917	2	0.848
FXR1	A8MSH5	A8MSH5	2	0.848
FXR1	H0YF33	H0YF33	2	0.848
FXR1	Q9P0J7	Q9P0J7	2	0.848
FXR1	O75817	O75817	2	0.848
FXR1	O60825-2	O60825	3	0.848
FXR1	Q96EY7	Q96EY7	2	0.848
FXR1	Q6ZS74	Q6ZS74	2	0.848
FXR1	Q14204	Q14204	47	0.848
FXR1	Q5JY65	Q5JY65	2	0.848
FXR1	P00387-3	P00387	2	0.848
FXR1	Q9BRX2	Q9BRX2	3	0.848
FXR1	P14866-2	P14866	2	0.848
FXR1	Q5SRQ6	Q5SRQ6	2	0.846
FXR1	H0Y742	H0Y742	3	0.846
FXR1	Q9Y2Z4	Q9Y2Z4	2	0.846
FXR1	B4DHE8	B4DHE8	2	0.846
FXR1	Q08257	Q08257	2	0.846
FXR1	Q5JPE7-2	Q5JPE7	3	0.846
FXR1	Q8N6C5-4	Q8N6C5	2	0.846
FXR1	P21964	P21964	2	0.846
FXR1	P61011-2	P61011	2	0.846
FXR1	Q9UGP8	Q9UGP8	2	0.846
FXR1	Q12802-4	Q12802	2	0.846
FXR1	Q9H7E9	Q9H7E9	2	0.846
FXR1	Q13823	Q13823	2	0.846
FXR1	Q13098-5	Q13098	2	0.846
FXR1	Q14258	Q14258	19	0.844
FXR1	Q86UK7-2	Q86UK7	2	0.844
FXR1	H3BVI7	H3BVI7	2	0.844
FXR1	Q9BRQ8	Q9BRQ8	3	0.844
FXR1	B4DYH1	B4DYH1	2	0.844
FXR1	Q9Y679-3	Q9Y679	2	0.844
FXR1	K7ERG1	K7ERG1	2	0.844
FXR1	Q3MHD2	Q3MHD2	2	0.844
FXR1	Q9P0I2	Q9P0I2	2	0.844
FXR1	A6NDW3	A6NDW3	2	0.844
FXR1	Q9ULC4-3	Q9ULC4	2	0.844
FXR1	P31040	P31040	2	0.844
FXR1	Q9NYH9	Q9NYH9	2	0.844
FXR1	P14324	P14324	2	0.842
FXR1	Q9BTE6-3	Q9BTE6	2	0.842
FXR1	M0QYT0	M0QYT0	2	0.842
FXR1	P42224-2	P42224	2	0.842
FXR1	Q8N2K0-2	Q8N2K0	2	0.842
FXR1	H3BMV3	H3BMV3	2	0.842
FXR1	H3BUG4	H3BUG4	2	0.842
FXR1	Q9H832	Q9H832	2	0.842
FXR1	Q9BTT6	Q9BTT6	2	0.842
FXR1	Q96N67-3	Q96N67	2	0.842
FXR1	B4DVE7	B4DVE7	2	0.842
FXR1	Q9Y3A3-3	Q9Y3A3	2	0.842
FXR1	Q8NFV4	Q8NFV4	2	0.842
FXR1	E7ENY0	E7ENY0	2	0.842
FXR1	Q9NR56	Q9NR56	2	0.842
FXR1	P55081	P55081	2	0.842
FXR1	P56856	P56856	2	0.842
FXR1	O43837	O43837	2	0.84
FXR1	Q8TC07-2	Q8TC07	2	0.84
FXR1	P36543-2	P36543	2	0.84
FXR1	Q08380	Q08380	2	0.84
FXR1	P48444-2	P48444	2	0.84
FXR1	P17655	P17655	2	0.84
FXR1	C9K0G7	C9K0G7	2	0.84
FXR1	P30405	P30405	2	0.84
FXR1	D6R9B6	D6R9B6	2	0.84
FXR1	Q07021	Q07021	10	0.84
FXR1	Q16513-3	Q16513	2	0.84
FXR1	P56182	P56182	2	0.84
FXR1	Q9UM54-1	Q9UM54	2	0.838
FXR1	Q9Y3T9	Q9Y3T9	2	0.838
FXR1	P23921	P23921	2	0.838
FXR1	P22352	P22352	2	0.838
FXR1	H7C0X4	H7C0X4	2	0.838
FXR1	Q8WVJ2	Q8WVJ2	2	0.838
FXR1	Q8TEQ6	Q8TEQ6	3	0.838
FXR1	P27986	P27986	2	0.836
FXR1	P19784	P19784	2	0.836
FXR1	Q96B26	Q96B26	2	0.836
FXR1	Q9H9A5-3	Q9H9A5	2	0.836
FXR1	E9PLH9	E9PLH9	2	0.836
FXR1	Q2NL82	Q2NL82	2	0.836
FXR1	Q13601	Q13601	2	0.836
FXR1	Q9UPN4-2	Q9UPN4	2	0.836
FXR1	E9PRQ7	E9PRQ7	2	0.836
FXR1	O43913	O43913	2	0.836
FXR1	H0Y9K8	H0Y9K8	2	0.836
FXR1	P60981	P60981	9	0.836
FXR1	Q9UJ72	Q9UJ72	2	0.834
FXR1	Q9NQW6-2	Q9NQW6	2	0.834
FXR1	P46087-3	P46087	2	0.834
FXR1	P35869	P35869	2	0.834
FXR1	P61764	P61764	2	0.834
FXR1	Q92879-2	Q92879	2	0.834
FXR1	Q8IXQ6-3	Q8IXQ6	2	0.834
FXR1	P19404	P19404	2	0.834
FXR1	H3BV22	H3BV22	2	0.834
FXR1	Q8IUM7	Q8IUM7	2	0.834
FXR1	Q9BUQ8	Q9BUQ8	2	0.834
FXR1	Q9BVJ6	Q9BVJ6	2	0.834
FXR1	O75695	O75695	2	0.832
FXR1	Q8TBP8	Q8TBP8	2	0.832
FXR1	B0S7Z5	B0S7Z5	2	0.832
FXR1	Q5TCU6	Q5TCU6	27	0.832
FXR1	Q96B58	Q96B58	2	0.832
FXR1	Q7L5D6	Q7L5D6	2	0.832
FXR1	Q9BQE5	Q9BQE5	2	0.832
FXR1	Q86UP2-3	Q86UP2	2	0.832
FXR1	F5H0C3	F5H0C3	2	0.832
FXR1	Q8TDD1	Q8TDD1	2	0.832
FXR1	Q5T948	Q5T948	2	0.832
FXR1	E7EMU4	E7EMU4	2	0.832
FXR1	P51149	P51149	19	0.832
FXR1	P19623	P19623	2	0.832
FXR1	Q9HAV7	Q9HAV7	2	0.83
FXR1	E7EPL9	E7EPL9	2	0.83
FXR1	G3V226	G3V226	2	0.83
FXR1	Q9NXF1	Q9NXF1	2	0.83
FXR1	P61962	P61962	2	0.83
FXR1	Q9ULW0	Q9ULW0	2	0.83
FXR1	Q9NVE7	Q9NVE7	2	0.83
FXR1	Q00325	Q00325	2	0.83
FXR1	Q6P1J9	Q6P1J9	2	0.828
FXR1	A2ACR1	A2ACR1	2	0.828
FXR1	O00505	O00505	2	0.828
FXR1	Q9UN37	Q9UN37	2	0.828
FXR1	B4DU75	B4DU75	2	0.828
FXR1	J3QL15	J3QL15	2	0.828
FXR1	Q9UHY1	Q9UHY1	2	0.828
FXR1	Q9NQT4	Q9NQT4	2	0.828
FXR1	Q9UJV9	Q9UJV9	2	0.828
FXR1	Q16512-3	Q16512	2	0.828
FXR1	H7C2G3	H7C2G3	2	0.828
FXR1	P40937-2	P40937	2	0.828
FXR1	K7ES38	K7ES38	2	0.826
FXR1	Q5T4T6-2	Q5T4T6	2	0.826
FXR1	E7ESG6	E7ESG6	2	0.826
FXR1	Q99567	Q99567	2	0.826
FXR1	Q9UBD5-3	Q9UBD5	2	0.826
FXR1	O75323-2	O75323	2	0.826
FXR1	Q8ND24	Q8ND24	2	0.826
FXR1	B4DW05	B4DW05	2	0.824
FXR1	Q9BQ13	Q9BQ13	2	0.824
FXR1	B4DF76	B4DF76	2	0.824
FXR1	Q96PZ0	Q96PZ0	2	0.824
FXR1	Q3KQV9	Q3KQV9	2	0.824
FXR1	Q9BT78-2	Q9BT78	2	0.824
FXR1	P10301	P10301	2	0.824
FXR1	Q96KP1	Q96KP1	2	0.822
FXR1	O76003	O76003	2	0.822
FXR1	P50440	P50440	2	0.822
FXR1	Q9BXY0	Q9BXY0	2	0.822
FXR1	P00734	P00734	2	0.822
FXR1	B4DYP1	B4DYP1	2	0.822
FXR1	Q15382	Q15382	2	0.822
FXR1	Q13283	Q13283	13	0.82
FXR1	O43264	O43264	2	0.82
FXR1	Q5QPK2	Q5QPK2	2	0.82
FXR1	P06744	P06744	29	0.82
FXR1	P22309	P22309	2	0.82
FXR1	E7ERS3	E7ERS3	2	0.82
FXR1	Q15427	Q15427	2	0.82
FXR1	F8VP89	F8VP89	2	0.82
FXR1	Q14152	Q14152	37	0.818
FXR1	B7Z6G2	B7Z6G2	2	0.818
FXR1	Q86WR0	Q86WR0	2	0.818
FXR1	Q9UEY8	Q9UEY8	2	0.818
FXR1	P07237	P07237	23	0.814
FXR1	Q03519	Q03519	2	0.814
FXR1	Q9BQ39	Q9BQ39	2	0.812
FXR1	Q9UKN8	Q9UKN8	2	0.81
FXR1	O43290	O43290	2	0.808
FXR1	P18085	P18085	19	0.808
FXR1	Q86Y56	Q86Y56	2	0.804
FXR1	P29317	P29317	19	0.804
FXR1	Q6P1M3-2	Q6P1M3	21	0.804
FXR1	Q5JTZ9	Q5JTZ9	2	0.802
FXR1	Q6PJG6	Q6PJG6	2	0.8
FXR1	O76041	O76041	2	0.8
FXR1	P40227	P40227	37	0.798
FXR1	Q15459	Q15459	2	0.798
FXR1	Q99575	Q99575	2	0.798
FXR1	Q9HCM7	Q9HCM7	2	0.796
FXR1	O14818	O14818	8	0.794
FXR1	Q8WTW3	Q8WTW3	2	0.794
FXR1	P50995	P50995	20	0.792
FXR1	P57678	P57678	2	0.792
FXR1	Q5T7C4	Q5T7C4	23	0.79
FXR1	P48735	P48735	13	0.788
FXR1	O14787	O14787	2	0.788
FXR1	Q9UID3	Q9UID3	2	0.786
FXR1	Q15181	Q15181	9	0.786
FXR1	P26196	P26196	26	0.78
FXR1	P30740	P30740	18	0.778
FXR1	P62304	P62304	6	0.774
FXR1	P28066	P28066	12	0.772
FXR1	Q9NRN7	Q9NRN7	9	0.768
FXR1	Q8IXT5	Q8IXT5	2	0.764
FXR1	O75717	O75717	2	0.76
FXR1	Q00796	Q00796	13	0.76
FXR1	I3L504	I3L504	17	0.756
FXR1	O15397	O15397	2	0.754
FXR1	Q13423	Q13423	2	0.752
FXR1	Q7L576	Q7L576	18	0.75
FXR1	Q15149-4	Q15149	1017	0.748
FXR1	O00151	O00151	18	0.746
FXR1	Q2NKX8	Q2NKX8	2	0.744
FXR1	P58107	P58107	351	0.74
FXR1	B5ME19	B5ME19	16	0.738
FXR1	O00515	O00515	19	0.734
FXR1	P62191	P62191	12	0.728
FXR1	O60832	O60832	13	0.728
FXR1	P84085	P84085	15	0.724
FXR1	O60264	O60264	16	0.722
FXR1	Q9NSD9	Q9NSD9	15	0.718
FXR1	P43686	P43686	11	0.718
FXR1	O14745	O14745	15	0.718
FXR1	Q96AG4	Q96AG4	16	0.712
FXR1	J3KQU9	J3KQU9	11	0.708
FXR1	Q9P0L0	Q9P0L0	7	0.708
FXR1	P41250	P41250	16	0.706
FXR1	P56537	P56537	7	0.706
FXR1	Q99959	Q99959	24	0.706
FXR1	Q5R370	Q5R370	9	0.704

## Sheet: FXR1_H358_07
Saint Bait	Prey	Entry	Total Spec	Max SAINT
FXR1	P13639	P13639	57	1
FXR1	O60716	O60716	13	1
FXR1	P12814	P12814	21	1
FXR1	Q15366	Q15366	14	1
FXR1	Q06787	Q06787	24	1
FXR1	P29401	P29401	25	1
FXR1	P00558	P00558	62	1
FXR1	P12277	P12277	47	1
FXR1	P38919	P38919	14	1
FXR1	P15311	P15311	24	1
FXR1	P38159	P38159	21	1
FXR1	P63244	P63244	19	1
FXR1	O00571	O00571	34	1
FXR1	O43707	O43707	39	1
FXR1	Q15149	Q15149	375	1
FXR1	Q14204	Q14204	55	1
FXR1	Q86XP3	Q86XP3	45	1
FXR1	E9PPU0	E9PPU0	46	1
FXR1	K7ERT8	K7ERT8	41	1
FXR1	P78527	P78527	96	1
FXR1	P60842	P60842	29	1
FXR1	P11388	P11388	18	1
FXR1	F8VW92	F8VW92	101	1
FXR1	P08865	P08865	13	0.998
FXR1	P23526	P23526	23	0.998
FXR1	O75369	O75369	43	0.998
FXR1	B9ZVX0	B9ZVX0	9	0.998
FXR1	P04075	P04075	38	0.998
FXR1	Q05639	Q05639	19	0.998
FXR1	Q09666	Q09666	98	0.998
FXR1	P00338	P00338	18	0.998
FXR1	O75643	O75643	26	0.998
FXR1	Q9Y5B9	Q9Y5B9	24	0.998
FXR1	Q06787	Q06787	25	0.998
FXR1	Q5TCU6	Q5TCU6	20	0.998
FXR1	F5H2F4	F5H2F4	17	0.998
FXR1	J3QL51	J3QL51	18	0.998
FXR1	G5E9S1	G5E9S1	19	0.998
FXR1	F8VYX6	F8VYX6	16	0.998
FXR1	Q92841	Q92841	20	0.998
FXR1	Q14157	Q14157	26	0.998
FXR1	P42704	P42704	20	0.998
FXR1	P04406	P04406	25	0.998
FXR1	A8MQB8	A8MQB8	37	0.998
FXR1	P29373	P29373	13	0.996
FXR1	P32119	P32119	11	0.996
FXR1	P16615	P16615	14	0.996
FXR1	Q32Q12	Q32Q12	17	0.996
FXR1	P15531	P15531	16	0.996
FXR1	J3QQV1	J3QQV1	23	0.996
FXR1	P27348	P27348	15	0.996
FXR1	M0R3D6	M0R3D6	13	0.996
FXR1	P51991	P51991	23	0.996
FXR1	P29692	P29692	15	0.996
FXR1	Q16658	Q16658	15	0.996
FXR1	Q12906	Q12906	15	0.996
FXR1	P33993	P33993	19	0.996
FXR1	Q13268	Q13268	24	0.996
FXR1	P27708	P27708	23	0.996
FXR1	F5H698	F5H698	15	0.996
FXR1	B5MDF5	B5MDF5	14	0.996
FXR1	A5YKK6	A5YKK6	18	0.996
FXR1	P61981	P61981	14	0.996
FXR1	O00410	O00410	15	0.996
FXR1	P49368	P49368	12	0.994
FXR1	H0Y4A6	H0Y4A6	17	0.994
FXR1	Q13310	Q13310	12	0.994
FXR1	O75534	O75534	12	0.994
FXR1	P43243	P43243	17	0.994
FXR1	P22234	P22234	12	0.994
FXR1	G3V576	G3V576	24	0.994
FXR1	P07195	P07195	11	0.994
FXR1	P62258	P62258	17	0.994
FXR1	Q9H0D6	Q9H0D6	10	0.994
FXR1	P07814	P07814	18	0.994
FXR1	P40227	P40227	12	0.994
FXR1	P31946	P31946	14	0.994
FXR1	Q04917	Q04917	12	0.994
FXR1	F8VWC5	F8VWC5	11	0.994
FXR1	E9PK25	E9PK25	15	0.994
FXR1	O75367	O75367	10	0.994
FXR1	P37802	P37802	14	0.994
FXR1	P35580	P35580	23	0.994
FXR1	F5H7U0	F5H7U0	12	0.994
FXR1	P26583	P26583	9	0.994
FXR1	P41091	P41091	12	0.994
FXR1	Q7KZF4	Q7KZF4	17	0.994
FXR1	P52943	P52943	8	0.994
FXR1	Q00341	Q00341	23	0.992
FXR1	Q08945	Q08945	17	0.992
FXR1	P17931	P17931	8	0.992
FXR1	P51116	P51116	18	0.992
FXR1	D6RBZ0	D6RBZ0	8	0.992
FXR1	P62136	P62136	10	0.992
FXR1	P31947	P31947	11	0.992
FXR1	P50990	P50990	14	0.992
FXR1	E9PEB5	E9PEB5	13	0.992
FXR1	Q8WWM7	Q8WWM7	10	0.992
FXR1	P31948	P31948	12	0.992
FXR1	P62937	P62937	14	0.99
FXR1	Q07955	Q07955	14	0.99
FXR1	P53396	P53396	15	0.99
FXR1	P11413	P11413	9	0.99
FXR1	Q14152	Q14152	20	0.99
FXR1	O14980	O14980	16	0.99
FXR1	P35637	P35637	15	0.99
FXR1	P11216	P11216	19	0.99
FXR1	P11940	P11940	12	0.99
FXR1	P62140	P62140	9	0.99
FXR1	Q92616	Q92616	28	0.99
FXR1	P67809	P67809	9	0.99
FXR1	I3L504	I3L504	10	0.988
FXR1	O14950	O14950	9	0.988
FXR1	Q99832	Q99832	10	0.988
FXR1	P78347	P78347	10	0.988
FXR1	Q07666	Q07666	13	0.988
FXR1	P35232	P35232	7	0.988
FXR1	P26599	P26599	19	0.988
FXR1	P61204	P61204	8	0.988
FXR1	P07737	P07737	12	0.988
FXR1	P18085	P18085	9	0.988
FXR1	O14979	O14979	15	0.988
FXR1	Q8NC51	Q8NC51	9	0.988
FXR1	P41252	P41252	20	0.988
FXR1	Q96A08	Q96A08	17	0.988
FXR1	P26038	P26038	15	0.988
FXR1	Q13185	Q13185	8	0.986
FXR1	P78371	P78371	9	0.986
FXR1	Q01082	Q01082	9	0.986
FXR1	P30041	P30041	5	0.986
FXR1	E9PKG1	E9PKG1	8	0.986
FXR1	Q92900	Q92900	15	0.986
FXR1	Q96I24	Q96I24	10	0.986
FXR1	B7ZAR1	B7ZAR1	8	0.986
FXR1	Q15185	Q15185	5	0.986
FXR1	P60981	P60981	6	0.984
FXR1	Q03252	Q03252	11	0.984
FXR1	Q02880	Q02880	7	0.984
FXR1	Q92499	Q92499	15	0.984
FXR1	Q7L014	Q7L014	8	0.984
FXR1	P46940	P46940	17	0.984
FXR1	P61026	P61026	7	0.984
FXR1	A7MAP0	A7MAP0	8	0.984
FXR1	Q96QV6	Q96QV6	11	0.984
FXR1	Q00796	Q00796	8	0.984
FXR1	Q15029	Q15029	9	0.982
FXR1	Q9Y265	Q9Y265	10	0.982
FXR1	Q5T7C4	Q5T7C4	10	0.982
FXR1	P84085	P84085	7	0.982
FXR1	Q8N163	Q8N163	11	0.98
FXR1	Q7L1Q6	Q7L1Q6	8	0.98
FXR1	O60506	O60506	10	0.98
FXR1	G3V2Q1	G3V2Q1	7	0.98
FXR1	P50991	P50991	9	0.98
FXR1	P67936	P67936	6	0.98
FXR1	P40939	P40939	8	0.98
FXR1	P11586	P11586	12	0.98
FXR1	P55060	P55060	13	0.98
FXR1	Q9BRA2	Q9BRA2	6	0.98
FXR1	Q9Y3B4	Q9Y3B4	3	0.98
FXR1	P53621	P53621	13	0.98
FXR1	P84103	P84103	6	0.98
FXR1	P60174	P60174	7	0.978
FXR1	F5GY37	F5GY37	8	0.978
FXR1	Q9H0U4	Q9H0U4	6	0.978
FXR1	B5ME19	B5ME19	9	0.978
FXR1	O75694	O75694	7	0.978
FXR1	E9PLL6	E9PLL6	7	0.978
FXR1	Q8TEX9	Q8TEX9	7	0.978
FXR1	P61081	P61081	5	0.978
FXR1	Q9NZM1	Q9NZM1	8	0.978
FXR1	D3DQV9	D3DQV9	6	0.976
FXR1	Q13283	Q13283	6	0.976
FXR1	P26368	P26368	7	0.976
FXR1	Q92945	Q92945	9	0.976
FXR1	Q06787	Q06787	7	0.976
FXR1	O00299	O00299	6	0.976
FXR1	P56192	P56192	10	0.976
FXR1	Q9UQ80	Q9UQ80	7	0.976
FXR1	P31942	P31942	6	0.974
FXR1	Q9NR30	Q9NR30	15	0.974
FXR1	O76094	O76094	8	0.974
FXR1	Q9BTT0	Q9BTT0	7	0.974
FXR1	O00151	O00151	7	0.974
FXR1	Q9Y6E2	Q9Y6E2	7	0.972
FXR1	F5GYN4	F5GYN4	6	0.972
FXR1	J3KND3	J3KND3	7	0.972
FXR1	P49736	P49736	9	0.972
FXR1	Q96A72	Q96A72	5	0.972
FXR1	P14174	P14174	4	0.972
FXR1	P60903	P60903	7	0.972
FXR1	P53999	P53999	5	0.972
FXR1	P55072	P55072	7	0.972
FXR1	Q15717	Q15717	4	0.97
FXR1	Q9P258	Q9P258	6	0.97
FXR1	P06703	P06703	6	0.97
FXR1	H0YMF4	H0YMF4	6	0.97
FXR1	P55265	P55265	8	0.97
FXR1	P08758	P08758	7	0.97
FXR1	Q8TEQ6	Q8TEQ6	8	0.97
FXR1	P09382	P09382	4	0.97
FXR1	O75531	O75531	3	0.97
FXR1	P06737	P06737	7	0.97
FXR1	P25205	P25205	11	0.97
FXR1	P35241	P35241	9	0.968
FXR1	Q9UM54	Q9UM54	7	0.968
FXR1	P55884	P55884	8	0.968
FXR1	P35659	P35659	5	0.968
FXR1	O75369	O75369	6	0.968
FXR1	P17987	P17987	8	0.968
FXR1	Q06210	Q06210	9	0.968
FXR1	Q9Y224	Q9Y224	7	0.966
FXR1	Q13148	Q13148	6	0.966
FXR1	J3QL05	J3QL05	6	0.966
FXR1	Q9NTK5	Q9NTK5	6	0.966
FXR1	F5H5Y3	F5H5Y3	7	0.966
FXR1	P43246	P43246	5	0.966
FXR1	P33991	P33991	8	0.966
FXR1	P61106	P61106	5	0.966
FXR1	Q14839	Q14839	7	0.966
FXR1	Q27J81	Q27J81	7	0.966
FXR1	Q92973	Q92973	10	0.966
FXR1	P54136	P54136	9	0.966
FXR1	P49588	P49588	6	0.966
FXR1	Q86VP6	Q86VP6	8	0.966
FXR1	Q9Y3I0	Q9Y3I0	7	0.964
FXR1	Q9NZB2	Q9NZB2	5	0.964
FXR1	Q14566	Q14566	10	0.964
FXR1	Q9UN86	Q9UN86	6	0.964
FXR1	P48444	P48444	7	0.964
FXR1	Q14011	Q14011	3	0.964
FXR1	O43795	O43795	5	0.964
FXR1	P27695	P27695	6	0.964
FXR1	P14625	P14625	7	0.964
FXR1	O60264	O60264	8	0.964
FXR1	P14923	P14923	8	0.964
FXR1	G5E972	G5E972	5	0.964
FXR1	P11387	P11387	10	0.962
FXR1	Q7Z451	Q7Z451	6	0.962
FXR1	Q01813	Q01813	6	0.962
FXR1	P55769	P55769	3	0.962
FXR1	Q13247	Q13247	6	0.962
FXR1	Q14847	Q14847	5	0.962
FXR1	P26196	P26196	8	0.96
FXR1	P62995	P62995	4	0.96
FXR1	P04843	P04843	7	0.96
FXR1	P09661	P09661	4	0.96
FXR1	Q9UHD8	Q9UHD8	5	0.96
FXR1	Q16629	Q16629	5	0.96
FXR1	E9PGC0	E9PGC0	5	0.96
FXR1	Q9Y520	Q9Y520	5	0.96
FXR1	P59998	P59998	4	0.958
FXR1	P49411	P49411	7	0.958
FXR1	Q14683	Q14683	5	0.958
FXR1	Q8N1F7	Q8N1F7	6	0.958
FXR1	O00148	O00148	5	0.958
FXR1	P33992	P33992	7	0.958
FXR1	P23284	P23284	4	0.958
FXR1	B9A067	B9A067	5	0.956
FXR1	P30044	P30044	4	0.956
FXR1	Q13200	Q13200	6	0.956
FXR1	Q13242	Q13242	4	0.956
FXR1	Q13619	Q13619	5	0.956
FXR1	Q14247	Q14247	5	0.956
FXR1	Q01844	Q01844	4	0.956
FXR1	Q92688	Q92688	4	0.954
FXR1	M0R2S1	M0R2S1	4	0.954
FXR1	K7ERI7	K7ERI7	6	0.954
FXR1	Q7L576	Q7L576	5	0.954
FXR1	Q6NXG1	Q6NXG1	6	0.954
FXR1	P61160	P61160	7	0.954
FXR1	B4DDM6	B4DDM6	5	0.954
FXR1	P61619	P61619	4	0.954
FXR1	P07355	P07355	5	0.954
FXR1	Q96QK1	Q96QK1	4	0.954
FXR1	Q9UMS4	Q9UMS4	6	0.954
FXR1	P18754	P18754	5	0.952
FXR1	Q14974	Q14974	8	0.952
FXR1	B4DLW8	B4DLW8	44	0.952
FXR1	P51148	P51148	3	0.952
FXR1	J3KQG6	J3KQG6	5	0.952
FXR1	P63208	P63208	3	0.952
FXR1	P35222	P35222	5	0.952
FXR1	O43809	O43809	4	0.952
FXR1	Q9Y3C1	Q9Y3C1	4	0.952
FXR1	Q15056	Q15056	4	0.95
FXR1	F8W904	F8W904	4	0.95
FXR1	O60231	O60231	7	0.95
FXR1	F8W1P1	F8W1P1	4	0.95
FXR1	M0R0R2	M0R0R2	4	0.95
FXR1	P33176	P33176	7	0.95
FXR1	Q15019	Q15019	4	0.95
FXR1	P39687	P39687	3	0.95
FXR1	P18206	P18206	9	0.95
FXR1	B1AK88	B1AK88	4	0.95
FXR1	O15371	O15371	4	0.95
FXR1	F5H897	F5H897	4	0.95
FXR1	Q14258	Q14258	4	0.95
FXR1	Q9BUJ2	Q9BUJ2	5	0.95
FXR1	P60953	P60953	4	0.95
FXR1	Q13547	Q13547	5	0.95
FXR1	P12004	P12004	4	0.948
FXR1	M0QYT3	M0QYT3	4	0.948
FXR1	Q9NVP1	Q9NVP1	6	0.948
FXR1	P52292	P52292	4	0.948
FXR1	Q6P2E9	Q6P2E9	4	0.948
FXR1	F8W845	F8W845	4	0.948
FXR1	E7EMB3	E7EMB3	5	0.946
FXR1	Q08J23	Q08J23	5	0.946
FXR1	P62304	P62304	3	0.946
FXR1	P22102	P22102	6	0.946
FXR1	Q9Y2X3	Q9Y2X3	5	0.944
FXR1	Q5VY93	Q5VY93	4	0.944
FXR1	Q9UNX4	Q9UNX4	3	0.944
FXR1	Q9UJZ1	Q9UJZ1	4	0.944
FXR1	P39656	P39656	5	0.944
FXR1	P49773	P49773	3	0.944
FXR1	H0YNW5	H0YNW5	5	0.944
FXR1	Q12788	Q12788	5	0.944
FXR1	P15153	P15153	3	0.944
FXR1	Q96FJ2	Q96FJ2	2	0.942
FXR1	D6RAN4	D6RAN4	4	0.942
FXR1	Q9BQG0	Q9BQG0	3	0.942
FXR1	Q9Y266	Q9Y266	4	0.942
FXR1	Q7Z2W4	Q7Z2W4	6	0.942
FXR1	P42166	P42166	3	0.942
FXR1	O00567	O00567	7	0.942
FXR1	O43175	O43175	5	0.942
FXR1	Q8WXF1	Q8WXF1	4	0.942
FXR1	Q96HS1	Q96HS1	3	0.942
FXR1	Q5SSJ5	Q5SSJ5	3	0.942
FXR1	P62333	P62333	4	0.942
FXR1	P32322	P32322	4	0.942
FXR1	P60228	P60228	4	0.942
FXR1	P11908	P11908	3	0.942
FXR1	P31939	P31939	5	0.942
FXR1	P46087	P46087	4	0.942
FXR1	O15143	O15143	4	0.942
FXR1	Q00688	Q00688	4	0.94
FXR1	C9J6L0	C9J6L0	4	0.94
FXR1	H7C3I1	H7C3I1	4	0.94
FXR1	Q07021	Q07021	3	0.94
FXR1	P62306	P62306	2	0.94
FXR1	P09972	P09972	6	0.938
FXR1	F5H3I4	F5H3I4	5	0.938
FXR1	Q14019	Q14019	2	0.938
FXR1	Q15021	Q15021	4	0.938
FXR1	F8VPV9	F8VPV9	3	0.938
FXR1	P37108	P37108	2	0.938
FXR1	Q5R370	Q5R370	4	0.936
FXR1	Q9P0L0	Q9P0L0	3	0.936
FXR1	Q09028	Q09028	4	0.936
FXR1	P43487	P43487	3	0.936
FXR1	P47897	P47897	5	0.936
FXR1	Q7L2E3	Q7L2E3	3	0.936
FXR1	O75821	O75821	3	0.936
FXR1	Q9NX63	Q9NX63	3	0.934
FXR1	C9JIS1	C9JIS1	4	0.934
FXR1	P68400	P68400	4	0.934
FXR1	O95433	O95433	3	0.934
FXR1	F8W9N7	F8W9N7	2	0.934
FXR1	Q13813	Q13813	4	0.934
FXR1	Q9H0A0	Q9H0A0	4	0.934
FXR1	P16949	P16949	2	0.932
FXR1	P06730	P06730	3	0.932
FXR1	P61158	P61158	5	0.932
FXR1	Q8TDN6	Q8TDN6	3	0.932
FXR1	Q5JR07	Q5JR07	4	0.932
FXR1	Q9BY77	Q9BY77	3	0.932
FXR1	O75131	O75131	3	0.932
FXR1	Q16401	Q16401	3	0.932
FXR1	B4DP52	B4DP52	3	0.932
FXR1	P55010	P55010	3	0.932
FXR1	P31146	P31146	3	0.932
FXR1	Q9Y262	Q9Y262	3	0.932
FXR1	P06744	P06744	4	0.932
FXR1	Q9BXJ9	Q9BXJ9	3	0.932
FXR1	Q92598	Q92598	4	0.932
FXR1	K7EQ71	K7EQ71	3	0.932
FXR1	E7EVD1	E7EVD1	2	0.932
FXR1	B4DTG6	B4DTG6	3	0.932
FXR1	O95373	O95373	3	0.932
FXR1	O95372	O95372	3	0.93
FXR1	Q01780	Q01780	3	0.93
FXR1	Q9UPN6	Q9UPN6	3	0.93
FXR1	Q9H361	Q9H361	3	0.93
FXR1	Q9Y678	Q9Y678	3	0.93
FXR1	H0YIV4	H0YIV4	2	0.93
FXR1	O14602	O14602	3	0.93
FXR1	P13489	P13489	3	0.93
FXR1	Q86UK7	Q86UK7	3	0.93
FXR1	G5E9R5	G5E9R5	4	0.93
FXR1	Q9BZE4	Q9BZE4	4	0.928
FXR1	Q5VXV2	Q5VXV2	4	0.928
FXR1	F8VXU5	F8VXU5	3	0.928
FXR1	Q9NSD9	Q9NSD9	3	0.928
FXR1	P12268	P12268	3	0.928
FXR1	P42285	P42285	3	0.928
FXR1	B4DUT8	B4DUT8	3	0.928
FXR1	P46060	P46060	2	0.928
FXR1	Q9NVI7	Q9NVI7	3	0.926
FXR1	P39748	P39748	3	0.926
FXR1	B4DWW4	B4DWW4	3	0.926
FXR1	P49327	P49327	206	0.926
FXR1	Q14980	Q14980	3	0.926
FXR1	P35080	P35080	2	0.926
FXR1	P02786	P02786	6	0.926
FXR1	Q14166	Q14166	4	0.926
FXR1	F2Z2V0	F2Z2V0	3	0.926
FXR1	P17858	P17858	3	0.926
FXR1	Q6EEV6	Q6EEV6	2	0.924
FXR1	B3KP96	B3KP96	3	0.924
FXR1	P08237	P08237	3	0.924
FXR1	Q9UHX1	Q9UHX1	4	0.924
FXR1	P28066	P28066	2	0.922
FXR1	P40121	P40121	3	0.922
FXR1	Q03169	Q03169	3	0.922
FXR1	Q15365	Q15365	25	0.922
FXR1	Q99848	Q99848	3	0.922
FXR1	Q96GQ7	Q96GQ7	3	0.922
FXR1	O43592	O43592	3	0.922
FXR1	P0CF74	P0CF74	2	0.922
FXR1	P51571	P51571	2	0.922
FXR1	P10515	P10515	3	0.922
FXR1	Q92621	Q92621	4	0.922
FXR1	P61221	P61221	3	0.92
FXR1	P49720	P49720	2	0.92
FXR1	O43242	O43242	3	0.92
FXR1	Q7RTV0	Q7RTV0	2	0.92
FXR1	Q9Y5A9	Q9Y5A9	3	0.92
FXR1	P51149	P51149	3	0.92
FXR1	Q9Y295	Q9Y295	4	0.92
FXR1	O14818	O14818	2	0.92
FXR1	F5GYQ2	F5GYQ2	2	0.92
FXR1	H0Y9J5	H0Y9J5	2	0.92
FXR1	Q9Y376	Q9Y376	2	0.92
FXR1	Q9Y383	Q9Y383	3	0.92
FXR1	Q92572	Q92572	2	0.92
FXR1	O00762	O00762	2	0.92
FXR1	P62330	P62330	2	0.918
FXR1	B4DUA4	B4DUA4	2	0.918
FXR1	P05161	P05161	2	0.918
FXR1	P61019	P61019	2	0.918
FXR1	Q9BZK7	Q9BZK7	3	0.918
FXR1	F5H1X8	F5H1X8	2	0.918
FXR1	P40926	P40926	3	0.918
FXR1	H0YEH2	H0YEH2	3	0.918
FXR1	Q13435	Q13435	3	0.918
FXR1	F8VZJ2	F8VZJ2	3	0.916
FXR1	J3KQU9	J3KQU9	3	0.916
FXR1	P20042	P20042	3	0.916
FXR1	O00303	O00303	3	0.916
FXR1	Q9NUQ6	Q9NUQ6	3	0.916
FXR1	M0R1A7	M0R1A7	2	0.916
FXR1	A0AV96	A0AV96	3	0.914
FXR1	C9JYS8	C9JYS8	2	0.914
FXR1	Q9NPC6	Q9NPC6	2	0.914
FXR1	F8VZQ9	F8VZQ9	2	0.914
FXR1	O15144	O15144	2	0.914
FXR1	P06493	P06493	3	0.914
FXR1	P09960	P09960	2	0.914
FXR1	O76021	O76021	3	0.914
FXR1	Q9NYF8	Q9NYF8	3	0.914
FXR1	Q9H6S3	Q9H6S3	2	0.914
FXR1	P02766	P02766	2	0.912
FXR1	Q9UKV8	Q9UKV8	2	0.912
FXR1	Q5VYK3	Q5VYK3	3	0.912
FXR1	P04844	P04844	2	0.912
FXR1	Q93084	Q93084	3	0.912
FXR1	Q9UHV9	Q9UHV9	2	0.912
FXR1	B0UXQ1	B0UXQ1	2	0.912
FXR1	B4DT67	B4DT67	2	0.912
FXR1	Q04446	Q04446	2	0.912
FXR1	Q13363	Q13363	3	0.912
FXR1	Q9BVP2	Q9BVP2	2	0.91
FXR1	Q9NYF8	Q9NYF8	3	0.91
FXR1	F5H2F9	F5H2F9	2	0.91
FXR1	P16615	P16615	3	0.908
FXR1	Q5SZ07	Q5SZ07	2	0.908
FXR1	Q13045	Q13045	2	0.908
FXR1	Q14192	Q14192	2	0.908
FXR1	B8ZZJ9	B8ZZJ9	2	0.908
FXR1	P55084	P55084	3	0.908
FXR1	G5E9E7	G5E9E7	3	0.906
FXR1	B4DUA9	B4DUA9	2	0.906
FXR1	Q15149	Q15149	305	0.906
FXR1	D6RHZ5	D6RHZ5	3	0.906
FXR1	O95347	O95347	3	0.906
FXR1	P20700	P20700	36	0.906
FXR1	Q01081	Q01081	2	0.906
FXR1	F5H047	F5H047	3	0.906
FXR1	O15355	O15355	2	0.906
FXR1	P51648	P51648	2	0.906
FXR1	Q5T4S7	Q5T4S7	3	0.904
FXR1	P63151	P63151	2	0.904
FXR1	A6NHR9	A6NHR9	2	0.904
FXR1	O43237	O43237	2	0.904
FXR1	D6R9Z1	D6R9Z1	2	0.904
FXR1	Q92747	Q92747	2	0.904
FXR1	Q15437	Q15437	3	0.902
FXR1	O75340	O75340	2	0.902
FXR1	P12429	P12429	2	0.902
FXR1	Q8NE71	Q8NE71	2	0.902
FXR1	B4DJV2	B4DJV2	2	0.902
FXR1	P00338	P00338	2	0.902
FXR1	P30101	P30101	2	0.902
FXR1	Q15269	Q15269	3	0.902
FXR1	Q9BXP5	Q9BXP5	2	0.902
FXR1	Q9Y5S9	Q9Y5S9	2	0.902
FXR1	O15042	O15042	2	0.9
FXR1	O60884	O60884	2	0.9
FXR1	Q96B58	Q96B58	2	0.9
FXR1	P17655	P17655	2	0.9
FXR1	P49721	P49721	2	0.9
FXR1	P22314	P22314	3	0.9
FXR1	F8VVA7	F8VVA7	2	0.9
FXR1	J3KTF8	J3KTF8	2	0.9
FXR1	P25788	P25788	2	0.898
FXR1	Q96AG4	Q96AG4	2	0.898
FXR1	E2QRB9	E2QRB9	2	0.898
FXR1	P16144	P16144	2	0.898
FXR1	K7ESG5	K7ESG5	2	0.898
FXR1	Q02790	Q02790	2	0.898
FXR1	H0YM23	H0YM23	2	0.898
FXR1	Q13347	Q13347	2	0.898
FXR1	B4DNE4	B4DNE4	3	0.898
FXR1	P61224	P61224	2	0.896
FXR1	Q14739	Q14739	2	0.896
FXR1	D6RBD7	D6RBD7	2	0.896
FXR1	E7EX17	E7EX17	2	0.896
FXR1	O00487	O00487	2	0.896
FXR1	H3BV85	H3BV85	2	0.894
FXR1	Q86UE4	Q86UE4	2	0.894
FXR1	H0YMZ1	H0YMZ1	2	0.894
FXR1	E1P5S2	E1P5S2	2	0.894
FXR1	Q15436	Q15436	2	0.892
FXR1	Q12904	Q12904	2	0.892
FXR1	F8VSB5	F8VSB5	2	0.892
FXR1	P17096	P17096	2	0.892
FXR1	Q96HC4	Q96HC4	2	0.892
FXR1	O14617	O14617	2	0.892
FXR1	Q15008	Q15008	2	0.892
FXR1	A6NJA2	A6NJA2	2	0.89
FXR1	Q9UGI8	Q9UGI8	2	0.89
FXR1	Q5STZ7	Q5STZ7	2	0.888
FXR1	Q96TA1	Q96TA1	2	0.888
FXR1	Q5JRI1	Q5JRI1	2	0.888
FXR1	P42224	P42224	2	0.888
FXR1	H3BRK3	H3BRK3	2	0.886
FXR1	P51114	P51114	2	0.886
FXR1	B3KNT8	B3KNT8	2	0.886
FXR1	E9PI68	E9PI68	2	0.886
FXR1	E7EQL5	E7EQL5	2	0.886
FXR1	Q5T3Q7	Q5T3Q7	2	0.886
FXR1	D6RF83	D6RF83	2	0.884
FXR1	G3V2N3	G3V2N3	2	0.884
FXR1	Q96B97	Q96B97	2	0.882
FXR1	P53618	P53618	2	0.88
FXR1	P61758	P61758	2	0.88
FXR1	H3BRS6	H3BRS6	2	0.878
FXR1	O94905	O94905	2	0.876
FXR1	F8W950	F8W950	2	0.876
FXR1	P61962	P61962	2	0.876
FXR1	Q15020	Q15020	2	0.874
FXR1	B5MCF9	B5MCF9	2	0.872
FXR1	O95573	O95573	2	0.872
FXR1	P30520	P30520	2	0.872
FXR1	P45974	P45974	2	0.87
FXR1	P29317	P29317	2	0.87
FXR1	O75083	O75083	20	0.87
FXR1	Q12874	Q12874	2	0.866
FXR1	C9JZD1	C9JZD1	2	0.866
FXR1	Q9H3U1	Q9H3U1	2	0.862
FXR1	O94906	O94906	2	0.86
FXR1	Q9BSJ8	Q9BSJ8	2	0.85
FXR1	Q9UIA9	Q9UIA9	2	0.846
FXR1	Q14764	Q14764	2	0.844
FXR1	P54886	P54886	2	0.842
FXR1	Q16531	Q16531	2	0.834
FXR1	P35606	P35606	2	0.824
FXR1	Q9Y2L1	Q9Y2L1	2	0.82
FXR1	Q9UQE7	Q9UQE7	2	0.82
FXR1	Q9HAV4	Q9HAV4	2	0.796
FXR1	O75717	O75717	2	0.796
FXR1	O00203	O00203	2	0.778
FXR1	P62847	P62847	10	0.776
FXR1	Q9NTJ3	Q9NTJ3	2	0.768
FXR1	P04083	P04083	28	0.73
FXR1	J3QR09	J3QR09	10	0.7

## Sheet: FXR1_KATOIII_Entry
Saint Bait	Prey	Entry	Total Spec	Max SAINT	Entry_Database
FXR1	A0AV96	A0AV96	14	0.988	A0AV96
FXR1	A0FGR8-6	A0FGR8	5	0.928	A0FGR8
FXR1	A2ACR1	A2ACR1	2	0.828	A2ACR1
FXR1	A3KFL2	A3KFL2	2	0.85	A3KFL2
FXR1	A4D2Q0	A4D2Q0	5	0.948	A4D2Q0
FXR1	A5YKK6	A5YKK6	6	0.942	A5YKK6
FXR1	A6NKH4	A6NKH4	3	0.9	A6NKH4
FXR1	A6NMH6	A6NMH6	3	0.91	A6NMH6
FXR1	A8MQB8	A8MQB8	34	1	A8MQB8
FXR1	A8MSH5	A8MSH5	2	0.848	A8MSH5
FXR1	B1AK88	B1AK88	11	0.992	B1AK88
FXR1	B1AL05	B1AL05	2	0.862	B1AL05
FXR1	B2RPK0	B2RPK0	3	0.914	B2RPK0
FXR1	B3KP96	B3KP96	4	0.92	B3KP96
FXR1	B4DF76	B4DF76	2	0.824	B4DF76
FXR1	B4DFA2	B4DFA2	6	0.95	B4DFA2
FXR1	B4DHE8	B4DHE8	2	0.846	B4DHE8
FXR1	B4DJ10	B4DJ10	14	0.994	B4DJ10
FXR1	B4DJ96	B4DJ96	4	0.91	B4DJ96
FXR1	B4DQH4	B4DQH4	10	0.982	B4DQH4
FXR1	B4DS61	B4DS61	2	0.87	B4DS61
FXR1	B4DT67	B4DT67	18	0.96	B4DT67
FXR1	B4DTG6	B4DTG6	4	0.922	B4DTG6
FXR1	B4DU75	B4DU75	2	0.828	B4DU75
FXR1	B4DUA9	B4DUA9	3	0.878	B4DUA9
FXR1	B4DUT8	B4DUT8	14	1	B4DUT8
FXR1	B4DV00	B4DV00	6	0.938	B4DV00
FXR1	B4DVE7	B4DVE7	2	0.842	B4DVE7
FXR1	B4DW05	B4DW05	2	0.824	B4DW05
FXR1	B4DW73	B4DW73	5	0.934	B4DW73
FXR1	B4DWT1	B4DWT1	2	0.856	B4DWT1
FXR1	B4DWZ0	B4DWZ0	2	0.884	B4DWZ0
FXR1	B4DXY3	B4DXY3	15	0.998	B4DXY3
FXR1	B4DYH1	B4DYH1	2	0.844	B4DYH1
FXR1	B4DYP1	B4DYP1	2	0.822	B4DYP1
FXR1	B4E0R6	B4E0R6	2	0.868	B4E0R6
FXR1	B4E1E9	B4E1E9	2	0.874	B4E1E9
FXR1	B5MCX3	B5MCX3	14	0.992	B5MCX3
FXR1	B5MD17	B5MD17	3	0.894	B5MD17
FXR1	B5ME19	B5ME19	16	0.738	B5ME19
FXR1	B7Z254	B7Z254	22	0.914	B7Z254
FXR1	B7Z452	B7Z452	6	0.952	B7Z452
FXR1	B7Z6G2	B7Z6G2	2	0.818	B7Z6G2
FXR1	B7Z7M6	B7Z7M6	2	0.854	B7Z7M6
FXR1	B7Z815	B7Z815	8	0.974	B7Z815
FXR1	B7Z972	B7Z972	3	0.876	B7Z972
FXR1	B7Z9L0	B7Z9L0	6	0.954	B7Z9L0
FXR1	B7Z9L2	B7Z9L2	2	0.86	B7Z9L2
FXR1	B7ZAX5	B7ZAX5	2	0.85	B7ZAX5
FXR1	B7ZL00	B7ZL00	6	0.962	B7ZL00
FXR1	B8ZZ10	B8ZZ10	4	0.92	B8ZZ10
FXR1	B8ZZ47	B8ZZ47	4	0.916	B8ZZ47
FXR1	B9A067	B9A067	3	0.872	B9A067
FXR1	C9IZQ1	C9IZQ1	3	0.906	C9IZQ1
FXR1	C9J050	C9J050	3	0.882	C9J050
FXR1	C9J0K6	C9J0K6	6	0.956	C9J0K6
FXR1	C9J9W2	C9J9W2	4	0.9	C9J9W2
FXR1	C9JCA9	C9JCA9	2	0.864	C9JCA9
FXR1	C9JEU5	C9JEU5	5	0.956	C9JEU5
FXR1	C9JM19	C9JM19	5	0.926	C9JM19
FXR1	C9JW96	C9JW96	3	0.898	C9JW96
FXR1	C9K0G7	C9K0G7	2	0.84	C9K0G7
FXR1	D3DQV9	D3DQV9	8	0.964	D3DQV9
FXR1	D6R9B6	D6R9B6	2	0.84	D6R9B6
FXR1	D6RAY7	D6RAY7	3	0.86	D6RAY7
FXR1	D6RBD7	D6RBD7	2	0.862	D6RBD7
FXR1	D6REM6	D6REM6	2	0.854	D6REM6
FXR1	D6RF83	D6RF83	2	0.86	D6RF83
FXR1	D6RGI3	D6RGI3	4	0.92	D6RGI3
FXR1	D6RHZ5	D6RHZ5	3	0.912	D6RHZ5
FXR1	D6W5Y5	D6W5Y5	2	0.864	D6W5Y5
FXR1	E2QRB9	E2QRB9	7	0.972	E2QRB9
FXR1	E5KLK1	E5KLK1	2	0.866	E5KLK1
FXR1	E5RHT6	E5RHT6	4	0.9	E5RHT6
FXR1	E7EMU4	E7EMU4	2	0.832	E7EMU4
FXR1	E7ENU4	E7ENU4	4	0.904	E7ENU4
FXR1	E7ENY0	E7ENY0	2	0.842	E7ENY0
FXR1	E7EP00	E7EP00	5	0.938	E7EP00
FXR1	E7EP32	E7EP32	5	0.93	E7EP32
FXR1	E7EPL9	E7EPL9	2	0.83	E7EPL9
FXR1	E7EQN5	E7EQN5	3	0.886	E7EQN5
FXR1	E7ERI3	E7ERI3	11	0.996	E7ERI3
FXR1	E7ERJ7	E7ERJ7	3	0.892	E7ERJ7
FXR1	E7ERS3	E7ERS3	2	0.82	E7ERS3
FXR1	E7ES33	E7ES33	7	0.962	E7ES33
FXR1	E7ESI2	E7ESI2	4	0.91	E7ESI2
FXR1	E7ESL0	E7ESL0	4	0.912	E7ESL0
FXR1	E7ET59	E7ET59	3	0.884	E7ET59
FXR1	E7ET75	E7ET75	4	0.9	E7ET75
FXR1	E7ETB3	E7ETB3	2	0.872	E7ETB3
FXR1	E7ETB7	E7ETB7	3	0.904	E7ETB7
FXR1	E7ETU7	E7ETU7	2	0.852	E7ETU7
FXR1	E7EV56	E7EV56	3	0.906	E7EV56
FXR1	E7EVX8	E7EVX8	4	0.896	E7EVX8
FXR1	E7EVY0	E7EVY0	2	0.85	E7EVY0
FXR1	E7EX44	E7EX44	2	0.85	E7EX44
FXR1	E9PBG7	E9PBG7	4	0.932	E9PBG7
FXR1	E9PBJ5	E9PBJ5	2	0.864	E9PBJ5
FXR1	E9PBK7	E9PBK7	4	0.926	E9PBK7
FXR1	E9PEB5	E9PEB5	5	0.942	E9PEB5
FXR1	E9PF18	E9PF18	4	0.894	E9PF18
FXR1	E9PFR3	E9PFR3	2	0.852	E9PFR3
FXR1	E9PFW3	E9PFW3	3	0.902	E9PFW3
FXR1	E9PI39	E9PI39	3	0.85	E9PI39
FXR1	E9PII3	E9PII3	5	0.942	E9PII3
FXR1	E9PJA7	E9PJA7	3	0.868	E9PJA7
FXR1	E9PJI4	E9PJI4	2	0.864	E9PJI4
FXR1	E9PKG1	E9PKG1	13	0.986	E9PKG1
FXR1	E9PKH6	E9PKH6	3	0.9	E9PKH6
FXR1	E9PKU7	E9PKU7	2	0.856	E9PKU7
FXR1	E9PLH9	E9PLH9	2	0.836	E9PLH9
FXR1	E9PM69	E9PM69	2	0.85	E9PM69
FXR1	E9PPC8	E9PPC8	4	0.914	E9PPC8
FXR1	E9PPU0	E9PPU0	205	1	E9PPU0
FXR1	E9PQD7	E9PQD7	5	0.898	E9PQD7
FXR1	E9PR16	E9PR16	2	0.888	E9PR16
FXR1	E9PRI4	E9PRI4	5	0.932	E9PRI4
FXR1	E9PRQ6	E9PRQ6	2	0.878	E9PRQ6
FXR1	E9PRQ7	E9PRQ7	2	0.836	E9PRQ7
FXR1	F2Z2S8	F2Z2S8	6	0.938	F2Z2S8
FXR1	F2Z2V0	F2Z2V0	16	0.86	F2Z2V0
FXR1	F5GX23	F5GX23	4	0.908	F5GX23
FXR1	F5GX77	F5GX77	3	0.85	F5GX77
FXR1	F5GXS7	F5GXS7	2	0.89	F5GXS7
FXR1	F5GY56	F5GY56	2	0.858	F5GY56
FXR1	F5GYC4	F5GYC4	4	0.904	F5GYC4
FXR1	F5GYN4	F5GYN4	9	0.98	F5GYN4
FXR1	F5GYQ1	F5GYQ1	4	0.902	F5GYQ1
FXR1	F5GZS6	F5GZS6	3	0.884	F5GZS6
FXR1	F5H1L6	F5H1L6	3	0.858	F5H1L6
FXR1	F5H1N1	F5H1N1	2	0.876	F5H1N1
FXR1	F5H2F9	F5H2F9	7	0.948	F5H2F9
FXR1	F5H345	F5H345	2	0.852	F5H345
FXR1	F5H3P5	F5H3P5	2	0.856	F5H3P5
FXR1	F5H3Y3	F5H3Y3	2	0.866	F5H3Y3
FXR1	F5H4G7	F5H4G7	5	0.914	F5H4G7
FXR1	F5H4H2	F5H4H2	3	0.866	F5H4H2
FXR1	F5H4X1	F5H4X1	5	0.934	F5H4X1
FXR1	F5H5M9	F5H5M9	2	0.858	F5H5M9
FXR1	F5H7S3	F5H7S3	5	0.936	F5H7S3
FXR1	F6SBX2	F6SBX2	8	0.97	F6SBX2
FXR1	F8VP63	F8VP63	2	0.854	F8VP63
FXR1	F8VP89	F8VP89	2	0.82	F8VP89
FXR1	F8VR34	F8VR34	3	0.9	F8VR34
FXR1	F8VTU2	F8VTU2	5	0.942	F8VTU2
FXR1	F8VV71	F8VV71	4	0.906	F8VV71
FXR1	F8VVA7	F8VVA7	2	0.866	F8VVA7
FXR1	F8VXY3	F8VXY3	3	0.902	F8VXY3
FXR1	F8VYY9	F8VYY9	6	0.936	F8VYY9
FXR1	F8VZJ2	F8VZJ2	5	0.928	F8VZJ2
FXR1	F8VZQ9	F8VZQ9	2	0.848	F8VZQ9
FXR1	F8W0P7	F8W0P7	2	0.876	F8W0P7
FXR1	F8W6P5	F8W6P5	3	0.886	F8W6P5
FXR1	F8W7C6	F8W7C6	15	0.994	F8W7C6
FXR1	F8W845	F8W845	6	0.956	F8W845
FXR1	G3V226	G3V226	2	0.83	G3V226
FXR1	G3V2S9	G3V2S9	5	0.916	G3V2S9
FXR1	G3V4X8	G3V4X8	3	0.888	G3V4X8
FXR1	G3XAA9	G3XAA9	3	0.892	G3XAA9
FXR1	G5E9E7	G5E9E7	12	0.988	G5E9E7
FXR1	G5E9W7	G5E9W7	3	0.902	G5E9W7
FXR1	G5EA06	G5EA06	3	0.894	G5EA06
FXR1	G8JLD5	G8JLD5	5	0.928	G8JLD5
FXR1	H0Y742	H0Y742	3	0.846	H0Y742
FXR1	H0Y9K8	H0Y9K8	2	0.836	H0Y9K8
FXR1	H0YAK1	H0YAK1	3	0.862	H0YAK1
FXR1	H0YDC5	H0YDC5	3	0.894	H0YDC5
FXR1	H0YF33	H0YF33	2	0.848	H0YF33
FXR1	H0YF77	H0YF77	6	0.952	H0YF77
FXR1	H0YIC4	H0YIC4	5	0.94	H0YIC4
FXR1	H0YJ74	H0YJ74	2	0.864	H0YJ74
FXR1	H0YJQ3	H0YJQ3	4	0.916	H0YJQ3
FXR1	H0YK83	H0YK83	4	0.916	H0YK83
FXR1	H0YMZ1	H0YMZ1	5	0.934	H0YMZ1
FXR1	H0YNW5	H0YNW5	4	0.892	H0YNW5
FXR1	H3BMV3	H3BMV3	2	0.842	H3BMV3
FXR1	H3BNZ1	H3BNZ1	4	0.912	H3BNZ1
FXR1	H3BQD9	H3BQD9	2	0.85	H3BQD9
FXR1	H3BS70	H3BS70	2	0.878	H3BS70
FXR1	H3BS72	H3BS72	2	0.854	H3BS72
FXR1	H3BUG4	H3BUG4	2	0.842	H3BUG4
FXR1	H3BV22	H3BV22	2	0.834	H3BV22
FXR1	H3BVI7	H3BVI7	2	0.844	H3BVI7
FXR1	H7BY36	H7BY36	7	0.962	H7BY36
FXR1	H7C040	H7C040	4	0.9	H7C040
FXR1	H7C0X4	H7C0X4	2	0.838	H7C0X4
FXR1	H7C1K5	H7C1K5	4	0.898	H7C1K5
FXR1	H7C292	H7C292	2	0.864	H7C292
FXR1	H7C2G3	H7C2G3	2	0.828	H7C2G3
FXR1	H7C2P7	H7C2P7	2	0.868	H7C2P7
FXR1	H7C3I1	H7C3I1	2	0.868	H7C3I1
FXR1	H7C4B7	H7C4B7	3	0.876	H7C4B7
FXR1	I3L0H8	I3L0H8	4	0.93	I3L0H8
FXR1	I3L2B0	I3L2B0	7	0.95	I3L2B0
FXR1	I3L504	I3L504	17	0.756	I3L504
FXR1	I3NI30	I3NI30	7	0.956	I3NI30
FXR1	J3KNB1	J3KNB1	3	0.912	J3KNB1
FXR1	J3KNF8	J3KNF8	2	0.878	J3KNF8
FXR1	J3KNL4	J3KNL4	2	0.866	J3KNL4
FXR1	J3KPE3	J3KPE3	3	0.902	J3KPE3
FXR1	J3KPQ3	J3KPQ3	2	0.854	J3KPQ3
FXR1	J3KPV7	J3KPV7	2	0.85	J3KPV7
FXR1	J3KPW7	J3KPW7	3	0.9	J3KPW7
FXR1	J3KQE5	J3KQE5	2	0.854	J3KQE5
FXR1	J3KQU9	J3KQU9	11	0.708	J3KQU9
FXR1	J3KTB5	J3KTB5	7	0.954	J3KTB5
FXR1	J3QL15	J3QL15	2	0.828	J3QL15
FXR1	J3QQV1	J3QQV1	22	0.998	J3QQV1
FXR1	J3QQX2	J3QQX2	8	0.962	J3QQX2
FXR1	J3QS36	J3QS36	5	0.92	J3QS36
FXR1	J3QS62	J3QS62	4	0.904	J3QS62
FXR1	J3QT46	J3QT46	2	0.856	J3QT46
FXR1	J9JID1	J9JID1	3	0.878	J9JID1
FXR1	K4DIE0	K4DIE0	3	0.882	K4DIE0
FXR1	K7EIG1	K7EIG1	9	0.958	K7EIG1
FXR1	K7EK18	K7EK18	2	0.866	K7EK18
FXR1	K7EK45	K7EK45	2	0.876	K7EK45
FXR1	K7ELF1	K7ELF1	2	0.866	K7ELF1
FXR1	K7EMW4	K7EMW4	5	0.938	K7EMW4
FXR1	K7ENP3	K7ENP3	2	0.884	K7ENP3
FXR1	K7ERG1	K7ERG1	2	0.844	K7ERG1
FXR1	K7ES38	K7ES38	2	0.826	K7ES38
FXR1	K7ES59	K7ES59	2	0.862	K7ES59
FXR1	M0QYT0	M0QYT0	2	0.842	M0QYT0
FXR1	M0R0F0	M0R0F0	3	0.89	M0R0F0
FXR1	M0R0N4	M0R0N4	3	0.884	M0R0N4
FXR1	M0R0P1	M0R0P1	3	0.894	M0R0P1
FXR1	M0R1M5	M0R1M5	6	0.944	M0R1M5
FXR1	O00151	O00151	18	0.746	O00151
FXR1	O00154-4	O00154	4	0.914	O00154
FXR1	O00186	O00186	4	0.91	O00186
FXR1	O00203	O00203	4	0.942	O00203
FXR1	O00231	O00231	7	0.954	O00231
FXR1	O00232	O00232	8	0.95	O00232
FXR1	O00264	O00264	3	0.894	O00264
FXR1	O00303	O00303	12	0.986	O00303
FXR1	O00410-2	O00410	12	0.996	O00410
FXR1	O00487	O00487	3	0.902	O00487
FXR1	O00505	O00505	2	0.828	O00505
FXR1	O00515	O00515	19	0.734	O00515
FXR1	O00541-2	O00541	15	0.998	O00541
FXR1	O00567	O00567	27	1	O00567
FXR1	O00625	O00625	3	0.888	O00625
FXR1	O00629	O00629	4	0.91	O00629
FXR1	O00762	O00762	4	0.924	O00762
FXR1	O00764	O00764	4	0.916	O00764
FXR1	O14579	O14579	12	0.996	O14579
FXR1	O14617-5	O14617	2	0.852	O14617
FXR1	O14745	O14745	15	0.718	O14745
FXR1	O14787	O14787	2	0.788	O14787
FXR1	O14818	O14818	8	0.794	O14818
FXR1	O14980	O14980	35	0.972	O14980
FXR1	O15042	O15042	7	0.97	O15042
FXR1	O15145	O15145	7	0.992	O15145
FXR1	O15160	O15160	5	0.932	O15160
FXR1	O15195-2	O15195	2	0.86	O15195
FXR1	O15226	O15226	3	0.9	O15226
FXR1	O15305	O15305	4	0.91	O15305
FXR1	O15355	O15355	6	0.956	O15355
FXR1	O15371	O15371	9	0.972	O15371
FXR1	O15397	O15397	2	0.754	O15397
FXR1	O15498	O15498	5	0.954	O15498
FXR1	O15511	O15511	2	0.886	O15511
FXR1	O43150	O43150	3	0.908	O43150
FXR1	O43172	O43172	6	0.972	O43172
FXR1	O43237	O43237	5	0.946	O43237
FXR1	O43264	O43264	2	0.82	O43264
FXR1	O43290	O43290	2	0.808	O43290
FXR1	O43395	O43395	2	0.87	O43395
FXR1	O43396	O43396	9	0.986	O43396
FXR1	O43447	O43447	5	0.966	O43447
FXR1	O43592	O43592	3	0.9	O43592
FXR1	O43660-2	O43660	5	0.928	O43660
FXR1	O43684-2	O43684	13	0.994	O43684
FXR1	O43776	O43776	24	1	O43776
FXR1	O43795-2	O43795	6	0.94	O43795
FXR1	O43809	O43809	14	0.996	O43809
FXR1	O43818	O43818	5	0.938	O43818
FXR1	O43837	O43837	2	0.84	O43837
FXR1	O43913	O43913	2	0.836	O43913
FXR1	O60231	O60231	6	0.934	O60231
FXR1	O60264	O60264	16	0.722	O60264
FXR1	O60271-9	O60271	2	0.878	O60271
FXR1	O60361	O60361	17	0.996	O60361
FXR1	O60437	O60437	25	1	O60437
FXR1	O60488	O60488	5	0.938	O60488
FXR1	O60493	O60493	2	0.852	O60493
FXR1	O60506-2	O60506	2	0.886	O60506
FXR1	O60573	O60573	2	0.858	O60573
FXR1	O60825-2	O60825	3	0.848	O60825
FXR1	O60832	O60832	13	0.728	O60832
FXR1	O60841	O60841	4	0.936	O60841
FXR1	O75116	O75116	17	0.994	O75116
FXR1	O75131	O75131	20	0.866	O75131
FXR1	O75251	O75251	2	0.864	O75251
FXR1	O75312	O75312	6	0.938	O75312
FXR1	O75323-2	O75323	2	0.826	O75323
FXR1	O75340	O75340	3	0.874	O75340
FXR1	O75348	O75348	2	0.89	O75348
FXR1	O75367	O75367	11	0.978	O75367
FXR1	O75390	O75390	7	0.94	O75390
FXR1	O75396	O75396	4	0.946	O75396
FXR1	O75400-3	O75400	3	0.896	O75400
FXR1	O75436	O75436	11	0.996	O75436
FXR1	O75439	O75439	2	0.868	O75439
FXR1	O75477	O75477	6	0.938	O75477
FXR1	O75489	O75489	6	0.946	O75489
FXR1	O75531	O75531	3	0.924	O75531
FXR1	O75534-2	O75534	10	0.986	O75534
FXR1	O75569-3	O75569	4	0.918	O75569
FXR1	O75691	O75691	5	0.858	O75691
FXR1	O75694-2	O75694	5	0.948	O75694
FXR1	O75695	O75695	2	0.832	O75695
FXR1	O75717	O75717	2	0.76	O75717
FXR1	O75817	O75817	2	0.848	O75817
FXR1	O75821	O75821	7	0.96	O75821
FXR1	O75822	O75822	3	0.89	O75822
FXR1	O75874	O75874	9	0.96	O75874
FXR1	O75955	O75955	5	0.95	O75955
FXR1	O75964	O75964	2	0.894	O75964
FXR1	O76003	O76003	2	0.822	O76003
FXR1	O76021	O76021	12	0.98	O76021
FXR1	O76041	O76041	2	0.8	O76041
FXR1	O76094	O76094	5	0.942	O76094
FXR1	O94817	O94817	2	0.888	O94817
FXR1	O94826	O94826	6	0.954	O94826
FXR1	O94874	O94874	10	0.974	O94874
FXR1	O94906	O94906	10	0.978	O94906
FXR1	A8MX09	A8MX09	3	0.898	O94967
FXR1	O95154	O95154	6	0.948	O95154
FXR1	O95239	O95239	6	0.968	O95239
FXR1	O95347	O95347	5	0.938	O95347
FXR1	O95372	O95372	5	0.948	O95372
FXR1	O95373	O95373	9	0.972	O95373
FXR1	O95433	O95433	10	0.97	O95433
FXR1	O95456	O95456	2	0.852	O95456
FXR1	O95486	O95486	6	0.968	O95486
FXR1	O95487-2	O95487	4	0.936	O95487
FXR1	O95571	O95571	5	0.944	O95571
FXR1	O95573	O95573	5	0.936	O95573
FXR1	O95747	O95747	3	0.92	O95747
FXR1	O95758-2	O95758	9	0.968	O95758
FXR1	O95777	O95777	3	0.952	O95777
FXR1	O95782	O95782	17	0.986	O95782
FXR1	O95831	O95831	8	0.974	O95831
FXR1	O95999	O95999	2	0.874	O95999
FXR1	P00338-3	P00338	12	0.992	P00338
FXR1	P00352	P00352	19	0.924	P00352
FXR1	P00387-3	P00387	2	0.848	P00387
FXR1	P00390-3	P00390	9	0.984	P00390
FXR1	P00403	P00403	3	0.886	P00403
FXR1	P00491	P00491	6	0.936	P00491
FXR1	P00492	P00492	2	0.872	P00492
FXR1	P00505	P00505	12	0.986	P00505
FXR1	P00734	P00734	2	0.822	P00734
FXR1	P00918	P00918	10	0.99	P00918
FXR1	P00966	P00966	10	0.974	P00966
FXR1	P01008	P01008	2	0.856	P01008
FXR1	P01024	P01024	6	0.962	P01024
FXR1	P02545-2	P02545	142	1	P02545
FXR1	P02675	P02675	9	0.952	P02675
FXR1	P02790	P02790	3	0.886	P02790
FXR1	P04040	P04040	5	0.956	P04040
FXR1	P04080	P04080	3	0.942	P04080
FXR1	P04183	P04183	7	0.972	P04183
FXR1	P04406	P04406	84	1	P04406
FXR1	P04632	P04632	8	0.992	P04632
FXR1	P04899	P04899	9	0.984	P04899
FXR1	P05023	P05023	23	0.996	P05023
FXR1	P05026	P05026	3	0.898	P05026
FXR1	P05091	P05091	4	0.882	P05091
FXR1	P05455	P05455	8	0.984	P05455
FXR1	P06400	P06400	5	0.952	P06400
FXR1	P06730-2	P06730	5	0.948	P06730
FXR1	P06744	P06744	29	0.82	P06744
FXR1	P06753-2	P06753	33	1	P06753
FXR1	P07237	P07237	23	0.814	P07237
FXR1	P07741-2	P07741	4	0.912	P07741
FXR1	P07910-2	P07910	25	1	P07910
FXR1	P08107-2	P08107	10	0.976	P08107
FXR1	P08237	P08237	7	0.966	P08237
FXR1	P08243	P08243	17	0.992	P08243
FXR1	P08579	P08579	3	0.874	P08579
FXR1	P08754	P08754	10	0.98	P08754
FXR1	P08865	P08865	18	1	P08865
FXR1	P09012	P09012	5	0.934	P09012
FXR1	P09110	P09110	10	0.966	P09110
FXR1	P09493-4	P09493	23	1	P09493
FXR1	P09622	P09622	10	0.98	P09622
FXR1	P09661	P09661	4	0.89	P09661
FXR1	P09960	P09960	4	0.91	P09960
FXR1	P09972	P09972	19	1	P09972
FXR1	P0C7H8	P0C7H8	5	0.982	P0C7H8
FXR1	P0CG38	P0CG38	81	1	P0CG38
FXR1	P0DI81	P0DI81	2	0.866	P0DI81
FXR1	P10301	P10301	2	0.824	P10301
FXR1	P10515	P10515	15	0.988	P10515
FXR1	P10768	P10768	7	0.958	P10768
FXR1	P11171-2	P11171	3	0.896	P11171
FXR1	P11172	P11172	5	0.93	P11172
FXR1	P11388-4	P11388	49	1	P11388
FXR1	P11413-3	P11413	19	0.956	P11413
FXR1	P11940-2	P11940	7	0.954	P11940
FXR1	J3KNE5	J3KNE5	4	0.906	P12081
FXR1	P12270	P12270	12	0.988	P12270
FXR1	P12532	P12532	17	0.998	P12532
FXR1	P12814	P12814	67	1	P12814
FXR1	P12931	P12931	3	0.898	P12931
FXR1	P13797	P13797	16	0.984	P13797
FXR1	P13804	P13804	18	0.996	P13804
FXR1	P14324	P14324	2	0.842	P14324
FXR1	P14550	P14550	4	0.932	P14550
FXR1	P14735	P14735	4	0.94	P14735
FXR1	P14866-2	P14866	2	0.848	P14866
FXR1	J3KQG6	J3KQG6	5	0.926	P15170
FXR1	P15374	P15374	3	0.868	P15374
FXR1	P15559-2	P15559	10	0.988	P15559
FXR1	P16144-4	P16144	23	1	P16144
FXR1	P16435	P16435	8	0.96	P16435
FXR1	P16989-3	P16989	5	0.93	P16989
FXR1	P17480-2	P17480	2	0.858	P17480
FXR1	P17612	P17612	3	0.872	P17612
FXR1	P17655	P17655	2	0.84	P17655
FXR1	P17812	P17812	7	0.958	P17812
FXR1	P17858	P17858	13	0.984	P17858
FXR1	P17980	P17980	11	0.988	P17980
FXR1	P18031	P18031	2	0.864	P18031
FXR1	P18085	P18085	19	0.808	P18085
FXR1	P18206	P18206	41	0.888	P18206
FXR1	P18283	P18283	4	0.94	P18283
FXR1	P18669	P18669	9	0.978	P18669
FXR1	P18754	P18754	8	0.968	P18754
FXR1	P19224	P19224	3	0.9	P19224
FXR1	P19367-2	P19367	8	0.97	P19367
FXR1	P19388	P19388	3	0.894	P19388
FXR1	P19404	P19404	2	0.834	P19404
FXR1	P19525	P19525	6	0.93	P19525
FXR1	P19623	P19623	2	0.832	P19623
FXR1	P19784	P19784	2	0.836	P19784
FXR1	P20042	P20042	13	0.914	P20042
FXR1	P20073-2	P20073	2	0.878	P20073
FXR1	P20339	P20339	4	0.944	P20339
FXR1	F5H668	F5H668	5	0.924	P20340
FXR1	P20618	P20618	5	0.956	P20618
FXR1	P20674	P20674	4	0.95	P20674
FXR1	P21283	P21283	5	0.926	P21283
FXR1	P21291	P21291	6	0.978	P21291
FXR1	P21802-11	P21802	20	1	P21802
FXR1	P21817-3	P21817	8	0.974	P21817
FXR1	P21953	P21953	2	0.874	P21953
FXR1	P21964	P21964	2	0.846	P21964
FXR1	P22059	P22059	8	0.968	P22059
FXR1	P22102	P22102	16	0.986	P22102
FXR1	E1B6W5	E1B6W5	2	0.854	P22307
FXR1	P22309	P22309	2	0.82	P22309
FXR1	P22352	P22352	2	0.838	P22352
FXR1	P22676	P22676	5	0.932	P22676
FXR1	P22695	P22695	7	0.952	P22695
FXR1	P23193	P23193	11	0.996	P23193
FXR1	G5E9H1	G5E9H1	6	0.946	P23229
FXR1	P23381	P23381	7	0.946	P23381
FXR1	P23919	P23919	7	0.978	P23919
FXR1	P23921	P23921	2	0.838	P23921
FXR1	P24539	P24539	7	0.97	P24539
FXR1	P25205	P25205	16	0.99	P25205
FXR1	P25786	P25786	12	0.994	P25786
FXR1	P25787	P25787	3	0.86	P25787
FXR1	P25788	P25788	6	0.96	P25788
FXR1	P25789	P25789	8	0.986	P25789
FXR1	P26196	P26196	26	0.78	P26196
FXR1	P26358-2	P26358	5	0.944	P26358
FXR1	P26368-2	P26368	17	1	P26368
FXR1	P26440	P26440	3	0.91	P26440
FXR1	P26583	P26583	9	0.982	P26583
FXR1	P26640	P26640	24	0.994	P26640
FXR1	P27694	P27694	4	0.922	P27694
FXR1	P27695	P27695	12	0.988	P27695
FXR1	P27797	P27797	3	0.878	P27797
FXR1	P27816-6	P27816	2	0.862	P27816
FXR1	P27986	P27986	2	0.836	P27986
FXR1	P28066	P28066	12	0.772	P28066
FXR1	P28074	P28074	4	0.922	P28074
FXR1	P28288	P28288	12	0.974	P28288
FXR1	P28331-2	P28331	5	0.932	P28331
FXR1	P28340	P28340	6	0.976	P28340
FXR1	P28838	P28838	4	0.91	P28838
FXR1	P29317	P29317	19	0.804	P29317
FXR1	P29401-2	P29401	47	0.94	P29401
FXR1	P29692-2	P29692	17	0.994	P29692
FXR1	P29992	P29992	3	0.88	P29992
FXR1	P30040	P30040	2	0.86	P30040
FXR1	P30041	P30041	11	0.992	P30041
FXR1	P30043	P30043	8	0.982	P30043
FXR1	P30044	P30044	13	0.994	P30044
FXR1	P30049	P30049	2	0.872	P30049
FXR1	P30084	P30084	5	0.92	P30084
FXR1	P30085	P30085	5	0.952	P30085
FXR1	P30086	P30086	7	0.988	P30086
FXR1	P30405	P30405	2	0.84	P30405
FXR1	P30419	P30419	6	0.932	P30419
FXR1	P30508	P30508	8	0.958	P30508
FXR1	P30520	P30520	4	0.886	P30520
FXR1	P30536	P30536	2	0.868	P30536
FXR1	P30566	P30566	8	0.978	P30566
FXR1	P30740	P30740	18	0.778	P30740
FXR1	P31040	P31040	2	0.844	P31040
FXR1	P31153	P31153	5	0.922	P31153
FXR1	P31350	P31350	21	1	P31350
FXR1	P31930	P31930	9	0.958	P31930
FXR1	P31937	P31937	4	0.91	P31937
FXR1	P31939	P31939	22	0.996	P31939
FXR1	P31948	P31948	26	1	P31948
FXR1	P32322	P32322	12	0.988	P32322
FXR1	P33947	P33947	4	0.94	P33947
FXR1	P33991	P33991	8	0.948	P33991
FXR1	P33993	P33993	14	0.98	P33993
FXR1	P34896-2	P34896	2	0.852	P34896
FXR1	P34897	P34897	8	0.948	P34897
FXR1	P35221	P35221	19	0.992	P35221
FXR1	P35222	P35222	31	0.858	P35222
FXR1	P35244	P35244	3	0.924	P35244
FXR1	P35249	P35249	7	0.954	P35249
FXR1	P35250	P35250	6	0.948	P35250
FXR1	P35270	P35270	5	0.936	P35270
FXR1	P35637-2	P35637	9	0.96	P35637
FXR1	P35659-2	P35659	4	0.92	P35659
FXR1	P35869	P35869	2	0.834	P35869
FXR1	P35914	P35914	4	0.922	P35914
FXR1	P35998	P35998	17	0.92	P35998
FXR1	P36542	P36542	7	0.97	P36542
FXR1	P36543-2	P36543	2	0.84	P36543
FXR1	P36551	P36551	3	0.882	P36551
FXR1	P36873-2	P36873	31	1	P36873
FXR1	P36952	P36952	7	0.956	P36952
FXR1	P37059	P37059	4	0.92	P37059
FXR1	P37108	P37108	2	0.866	P37108
FXR1	P37198	P37198	2	0.874	P37198
FXR1	P37837	P37837	5	0.946	P37837
FXR1	P38117	P38117	6	0.958	P38117
FXR1	P38432	P38432	2	0.854	P38432
FXR1	P39687	P39687	4	0.932	P39687
FXR1	P40222	P40222	3	0.906	P40222
FXR1	P40227	P40227	37	0.798	P40227
FXR1	P40306	P40306	3	0.874	P40306
FXR1	P40763-2	P40763	6	0.946	P40763
FXR1	P40925	P40925	7	0.928	P40925
FXR1	P40937-2	P40937	2	0.828	P40937
FXR1	P40938	P40938	3	0.866	P40938
FXR1	P41223	P41223	2	0.872	P41223
FXR1	P41227	P41227	3	0.89	P41227
FXR1	P41240	P41240	5	0.944	P41240
FXR1	P41250	P41250	16	0.706	P41250
FXR1	P41252	P41252	32	0.928	P41252
FXR1	P41567	P41567	2	0.88	P41567
FXR1	P42167	P42167	25	0.946	P42167
FXR1	P42224	P42224	7	0.954	P42224
FXR1	P42330	P42330	13	0.994	P42330
FXR1	P42704	P42704	73	1	P42704
FXR1	P43034	P43034	6	0.914	P43034
FXR1	P43243	P43243	19	0.994	P43243
FXR1	P43246	P43246	9	0.978	P43246
FXR1	P43487	P43487	8	0.994	P43487
FXR1	P43686	P43686	11	0.718	P43686
FXR1	P43897	P43897	2	0.866	P43897
FXR1	P45973	P45973	4	0.926	P45973
FXR1	P46013	P46013	39	0.98	P46013
FXR1	P46060	P46060	3	0.896	P46060
FXR1	P46063	P46063	5	0.92	P46063
FXR1	P46087-4	P46087	11	0.988	P46087
FXR1	P46734	P46734	13	0.998	P46734
FXR1	P46940	P46940	91	0.854	P46940
FXR1	P46977	P46977	3	0.92	P46977
FXR1	P48147	P48147	8	0.956	P48147
FXR1	P48444-2	P48444	2	0.84	P48444
FXR1	P48556	P48556	3	0.886	P48556
FXR1	P48643	P48643	36	1	P48643
FXR1	P48729	P48729	19	1	P48729
FXR1	P48730-2	P48730	3	0.892	P48730
FXR1	P48735	P48735	13	0.788	P48735
FXR1	P49189	P49189	3	0.924	P49189
FXR1	P49368	P49368	30	1	P49368
FXR1	P49411	P49411	28	0.862	P49411
FXR1	P49591	P49591	10	0.978	P49591
FXR1	P49643	P49643	2	0.868	P49643
FXR1	P49720	P49720	8	0.982	P49720
FXR1	P49748-3	P49748	7	0.966	P49748
FXR1	P49755	P49755	3	0.904	P49755
FXR1	P49756	P49756	3	0.924	P49756
FXR1	P49770	P49770	3	0.876	P49770
FXR1	P49773	P49773	7	0.988	P49773
FXR1	P49790	P49790	5	0.946	P49790
FXR1	P49902	P49902	3	0.928	P49902
FXR1	P50213	P50213	3	0.904	P50213
FXR1	P50395-2	P50395	4	0.918	P50395
FXR1	P50440	P50440	2	0.822	P50440
FXR1	P50454	P50454	5	0.916	P50454
FXR1	P50552	P50552	16	0.956	P50552
FXR1	P50570	P50570	17	0.984	P50570
FXR1	P50995	P50995	20	0.792	P50995
FXR1	P51114-2	P51114	11	0.992	P51114
FXR1	P51148	P51148	12	1	P51148
FXR1	P51149	P51149	19	0.832	P51149
FXR1	P51398-3	P51398	4	0.936	P51398
FXR1	P51451	P51451	3	0.902	P51451
FXR1	P51452	P51452	4	0.952	P51452
FXR1	P51571	P51571	3	0.878	P51571
FXR1	P51572	P51572	5	0.93	P51572
FXR1	P51648	P51648	16	0.984	P51648
FXR1	P51659	P51659	16	0.982	P51659
FXR1	P51665	P51665	5	0.942	P51665
FXR1	P51858	P51858	6	0.974	P51858
FXR1	P52209	P52209	18	1	P52209
FXR1	P52292	P52292	9	0.976	P52292
FXR1	P52294	P52294	7	0.954	P52294
FXR1	P52735-3	P52735	2	0.858	P52735
FXR1	P52788	P52788	8	0.976	P52788
FXR1	P52789	P52789	13	0.988	P52789
FXR1	P53004	P53004	4	0.93	P53004
FXR1	P53007	P53007	3	0.888	P53007
FXR1	P53041	P53041	3	0.906	P53041
FXR1	P53396	P53396	22	1	P53396
FXR1	P53597	P53597	2	0.854	P53597
FXR1	P53618	P53618	35	0.924	P53618
FXR1	P53621	P53621	65	0.964	P53621
FXR1	P54136	P54136	28	0.996	P54136
FXR1	P54577	P54577	13	0.99	P54577
FXR1	P55039	P55039	5	0.936	P55039
FXR1	P55060	P55060	48	1	P55060
FXR1	P55072	P55072	34	0.938	P55072
FXR1	P55081	P55081	2	0.842	P55081
FXR1	P55084	P55084	14	0.988	P55084
FXR1	P55263-3	P55263	4	0.95	P55263
FXR1	P55735-2	P55735	5	0.926	P55735
FXR1	P55786	P55786	4	0.928	P55786
FXR1	P55809	P55809	3	0.892	P55809
FXR1	P56182	P56182	2	0.84	P56182
FXR1	P56385	P56385	2	0.9	P56385
FXR1	P56537	P56537	7	0.706	P56537
FXR1	P56856	P56856	2	0.842	P56856
FXR1	P57088	P57088	3	0.896	P57088
FXR1	P57678	P57678	2	0.792	P57678
FXR1	P57740	P57740	4	0.91	P57740
FXR1	P58107	P58107	351	0.74	P58107
FXR1	P59998-3	P59998	9	0.98	P59998
FXR1	P60468	P60468	4	0.982	P60468
FXR1	P60900	P60900	10	0.992	P60900
FXR1	P60953	P60953	7	0.986	P60953
FXR1	P60981	P60981	9	0.836	P60981
FXR1	P61006	P61006	8	0.986	P61006
FXR1	P61009	P61009	2	0.86	P61009
FXR1	P61011-2	P61011	2	0.846	P61011
FXR1	P61019	P61019	6	0.966	P61019
FXR1	P61077-3	P61077	2	0.864	P61077
FXR1	P61081	P61081	9	0.99	P61081
FXR1	P61158	P61158	20	0.926	P61158
FXR1	P61163	P61163	18	1	P61163
FXR1	P61204	P61204	14	0.996	P61204
FXR1	P61221	P61221	12	0.976	P61221
FXR1	P61224-3	P61224	3	0.884	P61224
FXR1	P61289	P61289	16	0.994	P61289
FXR1	P61586	P61586	11	0.996	P61586
FXR1	P61619	P61619	6	0.932	P61619
FXR1	P61758	P61758	4	0.932	P61758
FXR1	P61764	P61764	2	0.834	P61764
FXR1	P61769	P61769	4	0.964	P61769
FXR1	P61962	P61962	2	0.83	P61962
FXR1	P61964	P61964	2	0.908	P61964
FXR1	P62136	P62136	32	1	P62136
FXR1	P62191	P62191	12	0.728	P62191
FXR1	P62195	P62195	12	0.978	P62195
FXR1	P62304	P62304	6	0.774	P62304
FXR1	P62330	P62330	7	0.988	P62330
FXR1	P62333	P62333	9	0.966	P62333
FXR1	P62633	P62633	3	0.896	P62633
FXR1	P62820	P62820	14	0.998	P62820
FXR1	P62837	P62837	2	0.868	P62837
FXR1	P62873	P62873	9	0.984	P62873
FXR1	P62879	P62879	12	0.994	P62879
FXR1	P62993	P62993	7	0.982	P62993
FXR1	P62995	P62995	7	0.968	P62995
FXR1	P63000	P63000	11	0.996	P63000
FXR1	P63010	P63010	16	0.982	P63010
FXR1	P63151	P63151	6	0.96	P63151
FXR1	P63167	P63167	5	0.972	P63167
FXR1	P67775	P67775	9	0.986	P67775
FXR1	P67809	P67809	22	0.968	P67809
FXR1	P68036	P68036	6	0.992	P68036
FXR1	P68400	P68400	8	0.962	P68400
FXR1	P68402	P68402	4	0.91	P68402
FXR1	P78318	P78318	4	0.906	P78318
FXR1	P78347-3	P78347	15	0.992	P78347
FXR1	P78527	P78527	197	0.932	P78527
FXR1	P84085	P84085	15	0.724	P84085
FXR1	P98175-3	P98175	2	0.856	P98175
FXR1	P98179	P98179	2	0.864	P98179
FXR1	Q00325	Q00325	2	0.83	Q00325
FXR1	Q00341	Q00341	30	0.998	Q00341
FXR1	Q00577	Q00577	5	0.918	Q00577
FXR1	Q00796	Q00796	13	0.76	Q00796
FXR1	Q01082-2	Q01082	3	0.902	Q01082
FXR1	Q01085-2	Q01085	2	0.856	Q01085
FXR1	Q01130	Q01130	6	0.97	Q01130
FXR1	Q01780-2	Q01780	3	0.892	Q01780
FXR1	Q01970	Q01970	5	0.958	Q01970
FXR1	Q02750	Q02750	7	0.966	Q02750
FXR1	Q02880	Q02880	14	0.99	Q02880
FXR1	F5GY65	F5GY65	4	0.908	Q02978
FXR1	Q03013	Q03013	4	0.928	Q03013
FXR1	Q03519	Q03519	2	0.814	Q03519
FXR1	Q03701	Q03701	5	0.972	Q03701
FXR1	G5E9S1	G5E9S1	62	0.97	Q04637
FXR1	Q04760	Q04760	3	0.916	Q04760
FXR1	Q04837	Q04837	5	0.982	Q04837
FXR1	Q06323	Q06323	5	0.934	Q06323
FXR1	Q06787-6	Q06787	32	1	Q06787
FXR1	Q07021	Q07021	10	0.84	Q07021
FXR1	Q07065	Q07065	2	0.854	Q07065
FXR1	Q07960	Q07960	3	0.848	Q07960
FXR1	Q08170	Q08170	3	0.886	Q08170
FXR1	Q08257	Q08257	2	0.846	Q08257
FXR1	Q08380	Q08380	2	0.84	Q08380
FXR1	Q08752	Q08752	4	0.914	Q08752
FXR1	Q08945	Q08945	15	0.992	Q08945
FXR1	Q08J23-2	Q08J23	4	0.91	Q08J23
FXR1	Q09161	Q09161	12	0.986	Q09161
FXR1	Q09666	Q09666	286	0.91	Q09666
FXR1	Q0VAN0	Q0VAN0	3	0.88	Q0VAN0
FXR1	Q10567-3	Q10567	11	0.984	Q10567
FXR1	Q10713	Q10713	3	0.904	Q10713
FXR1	Q12792-4	Q12792	5	0.932	Q12792
FXR1	Q12802-4	Q12802	2	0.846	Q12802
FXR1	Q12874	Q12874	3	0.888	Q12874
FXR1	Q12904	Q12904	13	0.998	Q12904
FXR1	Q12906-4	Q12906	20	1	Q12906
FXR1	Q12929	Q12929	8	0.958	Q12929
FXR1	Q12996	Q12996	3	0.9	Q12996
FXR1	Q13011	Q13011	5	0.918	Q13011
FXR1	Q13045	Q13045	11	0.988	Q13045
FXR1	Q13057	Q13057	7	0.922	Q13057
FXR1	Q13098-5	Q13098	2	0.846	Q13098
FXR1	Q13126	Q13126	5	0.93	Q13126
FXR1	Q13131	Q13131	2	0.868	Q13131
FXR1	Q13144	Q13144	3	0.876	Q13144
FXR1	Q13155	Q13155	9	0.976	Q13155
FXR1	Q13158	Q13158	3	0.904	Q13158
FXR1	Q13163-2	Q13163	2	0.854	Q13163
FXR1	Q13200	Q13200	25	0.998	Q13200
FXR1	Q13206	Q13206	2	0.864	Q13206
FXR1	Q13217	Q13217	2	0.85	Q13217
FXR1	Q13242	Q13242	3	0.92	Q13242
FXR1	Q13243	Q13243	4	0.924	Q13243
FXR1	Q13283	Q13283	13	0.82	Q13283
FXR1	Q13310-2	Q13310	15	1	Q13310
FXR1	Q13423	Q13423	2	0.752	Q13423
FXR1	Q13435	Q13435	11	0.974	Q13435
FXR1	Q13492-3	Q13492	15	1	Q13492
FXR1	Q13501-2	Q13501	3	0.89	Q13501
FXR1	Q13573	Q13573	2	0.868	Q13573
FXR1	Q13601	Q13601	2	0.836	Q13601
FXR1	Q13616	Q13616	6	0.96	Q13616
FXR1	Q13619	Q13619	7	0.962	Q13619
FXR1	Q13620-1	Q13620	8	0.966	Q13620
FXR1	Q13671-2	Q13671	4	0.914	Q13671
FXR1	Q13724	Q13724	3	0.908	Q13724
FXR1	Q13813-2	Q13813	28	0.942	Q13813
FXR1	Q13823	Q13823	2	0.846	Q13823
FXR1	Q13838-2	Q13838	25	0.998	Q13838
FXR1	Q13895	Q13895	3	0.88	Q13895
FXR1	Q13907	Q13907	2	0.852	Q13907
FXR1	Q13951	Q13951	3	0.914	Q13951
FXR1	Q14008-3	Q14008	16	1	Q14008
FXR1	Q14019	Q14019	9	0.994	Q14019
FXR1	Q14126	Q14126	15	0.984	Q14126
FXR1	Q14139	Q14139	5	0.952	Q14139
FXR1	Q14152	Q14152	37	0.818	Q14152
FXR1	Q14157-1	Q14157	17	0.998	Q14157
FXR1	Q14165	Q14165	4	0.92	Q14165
FXR1	Q14192	Q14192	3	0.882	Q14192
FXR1	A8MY36	A8MY36	3	0.912	Q14203
FXR1	Q14204	Q14204	47	0.848	Q14204
FXR1	Q14232	Q14232	3	0.916	Q14232
FXR1	Q14240	Q14240	16	0.998	Q14240
FXR1	E9PCP3	E9PCP3	4	0.928	Q14244
FXR1	Q14258	Q14258	19	0.844	Q14258
FXR1	Q14320	Q14320	6	0.934	Q14320
FXR1	Q14344	Q14344	5	0.92	Q14344
FXR1	Q14444	Q14444	6	0.946	Q14444
FXR1	Q14498-2	Q14498	9	0.978	Q14498
FXR1	Q14573	Q14573	7	0.966	Q14573
FXR1	Q14624-2	Q14624	2	0.87	Q14624
FXR1	Q14669-3	Q14669	2	0.858	Q14669
FXR1	Q14683	Q14683	14	0.992	Q14683
FXR1	Q14692	Q14692	3	0.906	Q14692
FXR1	Q14694-3	Q14694	4	0.9	Q14694
FXR1	Q14839-2	Q14839	6	0.964	Q14839
FXR1	Q14847-2	Q14847	10	0.98	Q14847
FXR1	Q14974	Q14974	24	0.996	Q14974
FXR1	Q14978-3	Q14978	6	0.936	Q14978
FXR1	Q14980-3	Q14980	18	0.998	Q14980
FXR1	Q14CX7	Q14CX7	3	0.874	Q14CX7
FXR1	Q15005	Q15005	2	0.858	Q15005
FXR1	Q15006	Q15006	2	0.852	Q15006
FXR1	Q15008	Q15008	9	0.978	Q15008
FXR1	Q15019	Q15019	14	0.998	Q15019
FXR1	Q15020	Q15020	3	0.908	Q15020
FXR1	Q15021	Q15021	8	0.986	Q15021
FXR1	Q15029	Q15029	29	1	Q15029
FXR1	Q15067-2	Q15067	2	0.878	Q15067
FXR1	Q15102	Q15102	4	0.912	Q15102
FXR1	Q15126	Q15126	3	0.91	Q15126
FXR1	Q15149-4	Q15149	1017	0.748	Q15149
FXR1	Q15181	Q15181	9	0.786	Q15181
FXR1	Q15185	Q15185	9	0.994	Q15185
FXR1	Q15269	Q15269	4	0.934	Q15269
FXR1	Q15286	Q15286	10	0.998	Q15286
FXR1	Q15291	Q15291	3	0.87	Q15291
FXR1	Q15366-4	Q15366	23	1	Q15366
FXR1	Q15369	Q15369	5	0.992	Q15369
FXR1	Q15370-2	Q15370	3	0.9	Q15370
FXR1	Q15382	Q15382	2	0.822	Q15382
FXR1	Q15392	Q15392	3	0.882	Q15392
FXR1	A0AV56	A0AV56	4	0.926	Q15424
FXR1	Q15427	Q15427	2	0.82	Q15427
FXR1	Q15436	Q15436	12	0.978	Q15436
FXR1	Q15459	Q15459	2	0.798	Q15459
FXR1	Q15637-3	Q15637	5	0.938	Q15637
FXR1	Q15645	Q15645	2	0.854	Q15645
FXR1	Q15654	Q15654	2	0.872	Q15654
FXR1	Q15691	Q15691	5	0.924	Q15691
FXR1	Q15717	Q15717	9	0.966	Q15717
FXR1	Q15738	Q15738	4	0.924	Q15738
FXR1	Q15758	Q15758	12	0.98	Q15758
FXR1	Q15785	Q15785	8	0.972	Q15785
FXR1	Q15833-2	Q15833	7	0.95	Q15833
FXR1	Q16401	Q16401	5	0.94	Q16401
FXR1	Q16512-3	Q16512	2	0.828	Q16512
FXR1	Q16513-3	Q16513	2	0.84	Q16513
FXR1	Q16531	Q16531	7	0.978	Q16531
FXR1	Q16539-3	Q16539	2	0.868	Q16539
FXR1	Q16543	Q16543	4	0.898	Q16543
FXR1	Q16576	Q16576	10	0.978	Q16576
FXR1	Q16630-2	Q16630	8	0.98	Q16630
FXR1	Q16698	Q16698	5	0.934	Q16698
FXR1	Q16762	Q16762	4	0.922	Q16762
FXR1	Q16795	Q16795	9	0.97	Q16795
FXR1	Q16851-2	Q16851	9	0.98	Q16851
FXR1	Q16880	Q16880	2	0.864	Q16880
FXR1	Q16891	Q16891	15	0.99	Q16891
FXR1	Q27J81	Q27J81	13	0.99	Q27J81
FXR1	Q2NKX8	Q2NKX8	2	0.744	Q2NKX8
FXR1	Q2NL82	Q2NL82	2	0.836	Q2NL82
FXR1	Q2TAM5	Q2TAM5	4	0.936	Q2TAM5
FXR1	Q2VIR3	Q2VIR3	3	0.906	Q2VIR3
FXR1	Q32MZ4-3	Q32MZ4	3	0.894	Q32MZ4
FXR1	Q32Q12	Q32Q12	29	0.998	Q32Q12
FXR1	Q3KQV9	Q3KQV9	2	0.824	Q3KQV9
FXR1	Q3LXA3	Q3LXA3	2	0.856	Q3LXA3
FXR1	Q3MHD2	Q3MHD2	2	0.844	Q3MHD2
FXR1	Q3ZCQ8-2	Q3ZCQ8	2	0.85	Q3ZCQ8
FXR1	Q4G0F5	Q4G0F5	4	0.918	Q4G0F5
FXR1	Q4JM47	Q4JM47	17	0.91	Q4JM47
FXR1	Q504U8	Q504U8	4	0.918	Q504U8
FXR1	Q53GQ0	Q53GQ0	5	0.936	Q53GQ0
FXR1	Q53GS9	Q53GS9	3	0.902	Q53GS9
FXR1	Q53H82	Q53H82	7	0.962	Q53H82
FXR1	Q53H96	Q53H96	5	0.936	Q53H96
FXR1	Q58FF6	Q58FF6	7	0.956	Q58FF6
FXR1	Q59FY4	Q59FY4	4	0.908	Q59FY4
FXR1	Q5H9R7-5	Q5H9R7	5	0.932	Q5H9R7
FXR1	Q5HYI8	Q5HYI8	2	0.876	Q5HYI8
FXR1	Q5JPE7-2	Q5JPE7	3	0.846	Q5JPE7
FXR1	Q5JR04	Q5JR04	4	0.936	Q5JR04
FXR1	Q5JR08	Q5JR08	9	0.974	Q5JR08
FXR1	Q5JRG1	Q5JRG1	2	0.852	Q5JRG1
FXR1	Q5JRI1	Q5JRI1	6	0.952	Q5JRI1
FXR1	Q5JS79	Q5JS79	9	0.978	Q5JS79
FXR1	Q5JTH9-3	Q5JTH9	4	0.888	Q5JTH9
FXR1	Q5JTZ9	Q5JTZ9	2	0.802	Q5JTZ9
FXR1	Q5JVF3-3	Q5JVF3	2	0.862	Q5JVF3
FXR1	Q5JW30	Q5JW30	8	0.982	Q5JW30
FXR1	Q5JWF2	Q5JWF2	6	0.95	Q5JWF2
FXR1	Q5JY65	Q5JY65	2	0.848	Q5JY65
FXR1	Q5JYR4	Q5JYR4	18	0.884	Q5JYR4
FXR1	Q5LJA9	Q5LJA9	2	0.854	Q5LJA9
FXR1	Q5QPK2	Q5QPK2	2	0.82	Q5QPK2
FXR1	Q5QPP3	Q5QPP3	3	0.884	Q5QPP3
FXR1	Q5RKV6	Q5RKV6	2	0.858	Q5RKV6
FXR1	Q5SRQ6	Q5SRQ6	2	0.846	Q5SRQ6
FXR1	Q5SSJ5	Q5SSJ5	4	0.932	Q5SSJ5
FXR1	Q5STU3	Q5STU3	13	1	Q5STU3
FXR1	Q5SWX3	Q5SWX3	2	0.878	Q5SWX3
FXR1	Q5SX87	Q5SX87	27	0.932	Q5SX87
FXR1	Q5T0H9	Q5T0H9	4	0.922	Q5T0H9
FXR1	Q5T2B5	Q5T2B5	5	0.93	Q5T2B5
FXR1	Q5T3Q7	Q5T3Q7	5	0.926	Q5T3Q7
FXR1	Q5T4S7-3	Q5T4S7	10	0.978	Q5T4S7
FXR1	Q5T4T6-2	Q5T4T6	2	0.826	Q5T4T6
FXR1	Q5T6F2	Q5T6F2	6	0.97	Q5T6F2
FXR1	Q5T6H7	Q5T6H7	4	0.924	Q5T6H7
FXR1	Q5T6W8	Q5T6W8	6	0.954	Q5T6W8
FXR1	Q5T7C4	Q5T7C4	23	0.79	Q5T7C4
FXR1	Q5T8N1	Q5T8N1	5	0.93	Q5T8N1
FXR1	Q5T8P6-3	Q5T8P6	2	0.864	Q5T8P6
FXR1	Q5T948	Q5T948	2	0.832	Q5T948
FXR1	Q5T9B7	Q5T9B7	3	0.884	Q5T9B7
FXR1	Q5TA02	Q5TA02	4	0.914	Q5TA02
FXR1	Q5TBG7	Q5TBG7	2	0.86	Q5TBG7
FXR1	Q5TCU3	Q5TCU3	7	0.962	Q5TCU3
FXR1	Q5TCU6	Q5TCU6	27	0.832	Q5TCU6
FXR1	Q5TFE4	Q5TFE4	2	0.858	Q5TFE4
FXR1	Q5U4A5	Q5U4A5	4	0.908	Q5U4A5
FXR1	Q5VU77	Q5VU77	4	0.9	Q5VU77
FXR1	Q5VV41-2	Q5VV41	2	0.852	Q5VV41
FXR1	Q5VV89	Q5VV89	2	0.854	Q5VV89
FXR1	Q5W0H4	Q5W0H4	8	0.97	Q5W0H4
FXR1	Q658Y4	Q658Y4	3	0.882	Q658Y4
FXR1	Q68DB1	Q68DB1	7	0.968	Q68DB1
FXR1	Q6DD88	Q6DD88	3	0.876	Q6DD88
FXR1	Q6N069-3	Q6N069	2	0.858	Q6N069
FXR1	Q6NUQ4	Q6NUQ4	3	0.866	Q6NUQ4
FXR1	Q6NXG1-3	Q6NXG1	12	0.998	Q6NXG1
FXR1	Q6P1J9	Q6P1J9	2	0.828	Q6P1J9
FXR1	Q6P1M3-2	Q6P1M3	21	0.804	Q6P1M3
FXR1	Q6P587-3	Q6P587	2	0.87	Q6P587
FXR1	Q6PI48	Q6PI48	4	0.924	Q6PI48
FXR1	Q6PJG6	Q6PJG6	2	0.8	Q6PJG6
FXR1	Q6PKG0	Q6PKG0	3	0.888	Q6PKG0
FXR1	Q6RFH5	Q6RFH5	4	0.91	Q6RFH5
FXR1	Q6UB35	Q6UB35	4	0.95	Q6UB35
FXR1	Q6WKZ4-3	Q6WKZ4	2	0.86	Q6WKZ4
FXR1	Q6XQN6	Q6XQN6	5	0.932	Q6XQN6
FXR1	Q6ZS74	Q6ZS74	2	0.848	Q6ZS74
FXR1	Q6ZWP6	Q6ZWP6	3	0.876	Q6ZWP6
FXR1	Q7L014	Q7L014	4	0.942	Q7L014
FXR1	Q7L1Q6-4	Q7L1Q6	10	0.984	Q7L1Q6
FXR1	Q7L2E3-3	Q7L2E3	4	0.918	Q7L2E3
FXR1	Q7L2H7	Q7L2H7	5	0.922	Q7L2H7
FXR1	Q7L576	Q7L576	18	0.75	Q7L576
FXR1	Q7L5D6	Q7L5D6	2	0.832	Q7L5D6
FXR1	Q7L5N1	Q7L5N1	4	0.936	Q7L5N1
FXR1	Q7RTR2	Q7RTR2	3	0.926	Q7RTR2
FXR1	Q7RTV0	Q7RTV0	2	0.894	Q7RTV0
FXR1	Q7Z2W4	Q7Z2W4	6	0.962	Q7Z2W4
FXR1	Q7Z406-6	Q7Z406	129	1	Q7Z406
FXR1	F5H0C3	F5H0C3	2	0.832	Q7Z4S6
FXR1	Q7Z5L9	Q7Z5L9	2	0.85	Q7Z5L9
FXR1	Q7Z6H8	Q7Z6H8	2	0.864	Q7Z6H8
FXR1	Q7Z6Z7-3	Q7Z6Z7	9	0.988	Q7Z6Z7
FXR1	Q7Z739	Q7Z739	12	0.982	Q7Z739
FXR1	Q7Z7K6	Q7Z7K6	3	0.874	Q7Z7K6
FXR1	Q86TB9-4	Q86TB9	2	0.856	Q86TB9
FXR1	Q86UE4	Q86UE4	4	0.924	Q86UE4
FXR1	Q86UK7-2	Q86UK7	2	0.844	Q86UK7
FXR1	Q86UP2-3	Q86UP2	2	0.832	Q86UP2
FXR1	Q86VI3	Q86VI3	3	0.876	Q86VI3
FXR1	Q86VP6	Q86VP6	16	0.998	Q86VP6
FXR1	Q86WR0	Q86WR0	2	0.818	Q86WR0
FXR1	Q86WX3	Q86WX3	2	0.874	Q86WX3
FXR1	Q86X55	Q86X55	2	0.856	Q86X55
FXR1	Q86X76-2	Q86X76	2	0.85	Q86X76
FXR1	Q86XP3	Q86XP3	6	0.962	Q86XP3
FXR1	Q6JUT2	Q6JUT2	2	0.866	Q86XR7
FXR1	Q86Y56	Q86Y56	2	0.804	Q86Y56
FXR1	Q8IUC1	Q8IUC1	3	0.894	Q8IUC1
FXR1	Q8IUM7	Q8IUM7	2	0.834	Q8IUM7
FXR1	Q8IV36-3	Q8IV36	2	0.872	Q8IV36
FXR1	Q8IWX8	Q8IWX8	3	0.872	Q8IWX8
FXR1	Q8IXQ6-3	Q8IXQ6	2	0.834	Q8IXQ6
FXR1	Q8IXT5	Q8IXT5	2	0.764	Q8IXT5
FXR1	Q8IY81	Q8IY81	3	0.906	Q8IY81
FXR1	Q8IZ83	Q8IZ83	5	0.948	Q8IZ83
FXR1	Q8IZP2	Q8IZP2	6	0.966	Q8IZP2
FXR1	Q8IZW8	Q8IZW8	4	0.932	Q8IZW8
FXR1	Q8N163	Q8N163	18	0.986	Q8N163
FXR1	Q8N1G4	Q8N1G4	9	0.972	Q8N1G4
FXR1	Q8N2K0-2	Q8N2K0	2	0.842	Q8N2K0
FXR1	Q8N3E9	Q8N3E9	5	0.93	Q8N3E9
FXR1	Q8N684-2	Q8N684	9	0.992	Q8N684
FXR1	Q8N6C5-4	Q8N6C5	2	0.846	Q8N6C5
FXR1	Q8N6H7	Q8N6H7	5	0.928	Q8N6H7
FXR1	Q8N766-3	Q8N766	3	0.886	Q8N766
FXR1	Q8N8N7	Q8N8N7	2	0.862	Q8N8N7
FXR1	Q8NBQ5	Q8NBQ5	4	0.9	Q8NBQ5
FXR1	Q8NBS9	Q8NBS9	5	0.936	Q8NBS9
FXR1	Q8NBW7	Q8NBW7	3	0.906	Q8NBW7
FXR1	Q8NBY1	Q8NBY1	3	0.896	Q8NBY1
FXR1	Q8NC51	Q8NC51	12	0.992	Q8NC51
FXR1	Q8NCA5	Q8NCA5	3	0.878	Q8NCA5
FXR1	Q8ND24	Q8ND24	2	0.826	Q8ND24
FXR1	Q8NE86	Q8NE86	2	0.858	Q8NE86
FXR1	Q8NF91-4	Q8NF91	2	0.856	Q8NF91
FXR1	Q8NFH4	Q8NFH4	5	0.924	Q8NFH4
FXR1	Q8NFJ5	Q8NFJ5	12	0.992	Q8NFJ5
FXR1	Q8NFV4	Q8NFV4	2	0.842	Q8NFV4
FXR1	Q8NI27	Q8NI27	3	0.874	Q8NI27
FXR1	Q8NI36	Q8NI36	3	0.916	Q8NI36
FXR1	Q8TAT6	Q8TAT6	5	0.954	Q8TAT6
FXR1	Q8TBP8	Q8TBP8	2	0.832	Q8TBP8
FXR1	Q8TC07-2	Q8TC07	2	0.84	Q8TC07
FXR1	Q8TC12	Q8TC12	5	0.936	Q8TC12
FXR1	Q8TCJ2	Q8TCJ2	3	0.848	Q8TCJ2
FXR1	Q8TCS8	Q8TCS8	3	0.896	Q8TCS8
FXR1	Q8TDB6	Q8TDB6	4	0.934	Q8TDB6
FXR1	Q8TDD1	Q8TDD1	2	0.832	Q8TDD1
FXR1	Q8TDN6	Q8TDN6	6	0.952	Q8TDN6
FXR1	Q8TE68	Q8TE68	9	0.966	Q8TE68
FXR1	Q8TE77	Q8TE77	4	0.93	Q8TE77
FXR1	Q8TEQ6	Q8TEQ6	3	0.838	Q8TEQ6
FXR1	Q8TEX9	Q8TEX9	4	0.926	Q8TEX9
FXR1	Q8WTW3	Q8WTW3	2	0.794	Q8WTW3
FXR1	Q8WU90	Q8WU90	4	0.918	Q8WU90
FXR1	Q8WUK0	Q8WUK0	2	0.862	Q8WUK0
FXR1	Q8WVJ2	Q8WVJ2	2	0.838	Q8WVJ2
FXR1	Q8WW12	Q8WW12	2	0.85	Q8WW12
FXR1	Q8WWI1	Q8WWI1	26	1	Q8WWI1
FXR1	Q8WWM7-2	Q8WWM7	15	0.998	Q8WWM7
FXR1	Q8WXI9	Q8WXI9	8	0.956	Q8WXI9
FXR1	Q8WXX5	Q8WXX5	4	0.932	Q8WXX5
FXR1	Q8WYA6-2	Q8WYA6	2	0.862	Q8WYA6
FXR1	Q8WZ42-11	Q8WZ42	5	0.928	Q8WZ42
FXR1	Q92499	Q92499	21	0.998	Q92499
FXR1	Q92572	Q92572	4	0.924	Q92572
FXR1	Q92597	Q92597	7	0.948	Q92597
FXR1	Q92614-2	Q92614	4	0.906	Q92614
FXR1	Q92615	Q92615	4	0.922	Q92615
FXR1	Q92616	Q92616	49	1	Q92616
FXR1	Q92621	Q92621	16	0.998	Q92621
FXR1	Q92804-2	Q92804	6	0.946	Q92804
FXR1	Q92841-1	Q92841	42	1	Q92841
FXR1	Q92878-3	Q92878	4	0.918	Q92878
FXR1	Q92879-2	Q92879	2	0.834	Q92879
FXR1	Q92882	Q92882	4	0.924	Q92882
FXR1	Q92888-3	Q92888	7	0.974	Q92888
FXR1	Q92890	Q92890	7	0.972	Q92890
FXR1	Q92900	Q92900	11	0.976	Q92900
FXR1	Q92905	Q92905	2	0.858	Q92905
FXR1	Q92917	Q92917	2	0.848	Q92917
FXR1	Q92973	Q92973	11	0.98	Q92973
FXR1	Q92979	Q92979	4	0.936	Q92979
FXR1	Q93008	Q93008	9	0.99	Q93008
FXR1	Q969X6-2	Q969X6	4	0.91	Q969X6
FXR1	Q969Z0	Q969Z0	3	0.892	Q969Z0
FXR1	Q96A33	Q96A33	2	0.86	Q96A33
FXR1	Q96A72	Q96A72	9	0.994	Q96A72
FXR1	Q96AG4	Q96AG4	16	0.712	Q96AG4
FXR1	Q96B26	Q96B26	2	0.836	Q96B26
FXR1	Q96B58	Q96B58	2	0.832	Q96B58
FXR1	Q96B97-2	Q96B97	3	0.916	Q96B97
FXR1	Q96C19	Q96C19	11	0.994	Q96C19
FXR1	Q96C36	Q96C36	8	0.976	Q96C36
FXR1	Q96C86	Q96C86	2	0.852	Q96C86
FXR1	Q96CG1	Q96CG1	9	0.978	Q96CG1
FXR1	Q96CW5	Q96CW5	2	0.868	Q96CW5
FXR1	Q96D46	Q96D46	5	0.928	Q96D46
FXR1	Q96DI7	Q96DI7	4	0.924	Q96DI7
FXR1	Q96E39	Q96E39	16	0.996	Q96E39
FXR1	Q96EE3-1	Q96EE3	3	0.898	Q96EE3
FXR1	Q96EP5-2	Q96EP5	7	0.956	Q96EP5
FXR1	Q96EY7	Q96EY7	2	0.848	Q96EY7
FXR1	Q96FZ2	Q96FZ2	2	0.858	Q96FZ2
FXR1	Q96GG9	Q96GG9	3	0.864	Q96GG9
FXR1	Q96HC4	Q96HC4	7	0.946	Q96HC4
FXR1	Q96HW7-2	Q96HW7	2	0.876	Q96HW7
FXR1	Q96I99	Q96I99	2	0.856	Q96I99
FXR1	Q96IR7	Q96IR7	4	0.936	Q96IR7
FXR1	Q96IU4	Q96IU4	6	0.972	Q96IU4
FXR1	Q96JY6-3	Q96JY6	3	0.894	Q96JY6
FXR1	Q96KB5	Q96KB5	4	0.914	Q96KB5
FXR1	Q96KP1	Q96KP1	2	0.822	Q96KP1
FXR1	Q96KP4	Q96KP4	10	0.982	Q96KP4
FXR1	Q96L35	Q96L35	2	0.874	Q96L35
FXR1	Q96N67-3	Q96N67	2	0.842	Q96N67
FXR1	Q96P11-4	Q96P11	4	0.916	Q96P11
FXR1	Q96P20-3	Q96P20	2	0.86	Q96P20
FXR1	Q96P70	Q96P70	5	0.948	Q96P70
FXR1	Q96PZ0	Q96PZ0	2	0.824	Q96PZ0
FXR1	Q96Q25	Q96Q25	5	0.936	Q96Q25
FXR1	Q96QK1	Q96QK1	20	0.992	Q96QK1
FXR1	Q96QR8	Q96QR8	7	0.966	Q96QR8
FXR1	Q96RL7-3	Q96RL7	3	0.896	Q96RL7
FXR1	Q96RP9	Q96RP9	5	0.944	Q96RP9
FXR1	Q96RS6-3	Q96RS6	3	0.908	Q96RS6
FXR1	Q96SQ9	Q96SQ9	7	0.946	Q96SQ9
FXR1	Q96T76-9	Q96T76	3	0.888	Q96T76
FXR1	Q96T88	Q96T88	3	0.898	Q96T88
FXR1	Q96TA1	Q96TA1	6	0.932	Q96TA1
FXR1	F5H8B1	F5H8B1	4	0.898	Q99447
FXR1	Q99460	Q99460	11	0.968	Q99460
FXR1	Q99471	Q99471	2	0.874	Q99471
FXR1	Q99497	Q99497	6	0.958	Q99497
FXR1	Q99567	Q99567	2	0.826	Q99567
FXR1	Q99575	Q99575	2	0.798	Q99575
FXR1	Q99623	Q99623	34	1	Q99623
FXR1	Q99714	Q99714	10	0.988	Q99714
FXR1	Q99798	Q99798	6	0.95	Q99798
FXR1	Q99816	Q99816	3	0.88	Q99816
FXR1	Q99832-3	Q99832	17	0.998	Q99832
FXR1	Q99848	Q99848	4	0.916	Q99848
FXR1	Q99959	Q99959	24	0.706	Q99959
FXR1	Q99986	Q99986	2	0.87	Q99986
FXR1	Q9BPX3	Q9BPX3	4	0.928	Q9BPX3
FXR1	Q9BQ13	Q9BQ13	2	0.824	Q9BQ13
FXR1	Q9BQ39	Q9BQ39	2	0.812	Q9BQ39
FXR1	Q9BQ67	Q9BQ67	6	0.938	Q9BQ67
FXR1	Q9BQE5	Q9BQE5	2	0.832	Q9BQE5
FXR1	Q9BQG0	Q9BQG0	13	0.986	Q9BQG0
FXR1	Q9BRA2	Q9BRA2	3	0.92	Q9BRA2
FXR1	Q9BRG1	Q9BRG1	3	0.916	Q9BRG1
FXR1	Q9BRJ6	Q9BRJ6	3	0.916	Q9BRJ6
FXR1	Q9BRP4-2	Q9BRP4	2	0.87	Q9BRP4
FXR1	Q9BRP8	Q9BRP8	2	0.85	Q9BRP8
FXR1	Q9BRQ8	Q9BRQ8	3	0.844	Q9BRQ8
FXR1	Q9BRX2	Q9BRX2	3	0.848	Q9BRX2
FXR1	Q9BRZ2	Q9BRZ2	4	0.956	Q9BRZ2
FXR1	Q9BSJ2-4	Q9BSJ2	4	0.906	Q9BSJ2
FXR1	Q9BSJ8	Q9BSJ8	4	0.944	Q9BSJ8
FXR1	Q9BT78-2	Q9BT78	2	0.824	Q9BT78
FXR1	Q9BTE6-3	Q9BTE6	2	0.842	Q9BTE6
FXR1	Q9BTE9	Q9BTE9	5	0.916	Q9BTE9
FXR1	Q5TB20	Q5TB20	6	0.932	Q9BTT0
FXR1	Q9BTT6	Q9BTT6	2	0.842	Q9BTT6
FXR1	Q9BU76	Q9BU76	4	0.928	Q9BU76
FXR1	Q9BUL8	Q9BUL8	4	0.948	Q9BUL8
FXR1	Q9BUL9	Q9BUL9	2	0.876	Q9BUL9
FXR1	Q9BUQ8	Q9BUQ8	2	0.834	Q9BUQ8
FXR1	Q9BV40	Q9BV40	2	0.894	Q9BV40
FXR1	Q9BV86	Q9BV86	2	0.886	Q9BV86
FXR1	Q9BVG4	Q9BVG4	2	0.85	Q9BVG4
FXR1	Q9BVI4	Q9BVI4	2	0.872	Q9BVI4
FXR1	Q9BVJ6	Q9BVJ6	2	0.834	Q9BVJ6
FXR1	Q9BVJ7	Q9BVJ7	3	0.94	Q9BVJ7
FXR1	Q9BVP2	Q9BVP2	12	0.972	Q9BVP2
FXR1	Q9BW04	Q9BW04	11	0.986	Q9BW04
FXR1	Q9BW19	Q9BW19	3	0.902	Q9BW19
FXR1	Q9BWF3	Q9BWF3	5	0.922	Q9BWF3
FXR1	Q9BX40	Q9BX40	5	0.92	Q9BX40
FXR1	Q9BXJ9	Q9BXJ9	8	0.978	Q9BXJ9
FXR1	Q9BXP5-2	Q9BXP5	10	0.976	Q9BXP5
FXR1	Q9BXY0	Q9BXY0	2	0.822	Q9BXY0
FXR1	Q9BY44	Q9BY44	16	0.988	Q9BY44
FXR1	Q9BYG3	Q9BYG3	4	0.942	Q9BYG3
FXR1	Q9BYJ9	Q9BYJ9	5	0.926	Q9BYJ9
FXR1	Q9BYK8	Q9BYK8	10	0.99	Q9BYK8
FXR1	Q9BYQ3	Q9BYQ3	7	0.986	Q9BYQ3
FXR1	Q9BYR4	Q9BYR4	2	0.888	Q9BYR4
FXR1	Q9BYR6	Q9BYR6	3	0.948	Q9BYR6
FXR1	Q9BYR7	Q9BYR7	3	0.966	Q9BYR7
FXR1	Q9BYR8	Q9BYR8	17	1	Q9BYR8
FXR1	Q9BZK7	Q9BZK7	5	0.904	Q9BZK7
FXR1	Q9BZZ5-2	Q9BZZ5	10	0.988	Q9BZZ5
FXR1	Q9GZL7	Q9GZL7	5	0.95	Q9GZL7
FXR1	Q9GZR7	Q9GZR7	4	0.924	Q9GZR7
FXR1	Q9GZS3	Q9GZS3	5	0.944	Q9GZS3
FXR1	Q9H061	Q9H061	2	0.856	Q9H061
FXR1	Q9H089	Q9H089	7	0.93	Q9H089
FXR1	Q9H0A0	Q9H0A0	12	0.986	Q9H0A0
FXR1	Q9H0D6	Q9H0D6	13	0.976	Q9H0D6
FXR1	Q9H190	Q9H190	2	0.85	Q9H190
FXR1	Q9H2G2	Q9H2G2	6	0.972	Q9H2G2
FXR1	Q9H2U1-2	Q9H2U1	6	0.936	Q9H2U1
FXR1	Q9H2U2-2	Q9H2U2	4	0.88	Q9H2U2
FXR1	Q9H307	Q9H307	4	0.914	Q9H307
FXR1	Q9H3K6	Q9H3K6	2	0.878	Q9H3K6
FXR1	Q9H3U1	Q9H3U1	10	0.97	Q9H3U1
FXR1	Q9H444	Q9H444	4	0.91	Q9H444
FXR1	Q9H4G0-2	Q9H4G0	12	0.992	Q9H4G0
FXR1	Q9H4M9	Q9H4M9	21	0.998	Q9H4M9
FXR1	Q9H6S3	Q9H6S3	2	0.876	Q9H6S3
FXR1	Q9H6T0	Q9H6T0	4	0.924	Q9H6T0
FXR1	Q9H7B2	Q9H7B2	6	0.948	Q9H7B2
FXR1	Q9H7E9	Q9H7E9	2	0.846	Q9H7E9
FXR1	Q9H832	Q9H832	2	0.842	Q9H832
FXR1	Q9H845	Q9H845	5	0.936	Q9H845
FXR1	Q9H8H0	Q9H8H0	6	0.954	Q9H8H0
FXR1	Q9H8V3-2	Q9H8V3	2	0.904	Q9H8V3
FXR1	Q9H9A5-3	Q9H9A5	2	0.836	Q9H9A5
FXR1	Q9HA64	Q9HA64	2	0.852	Q9HA64
FXR1	Q9HAV0	Q9HAV0	3	0.872	Q9HAV0
FXR1	Q9HAV4	Q9HAV4	5	0.962	Q9HAV4
FXR1	Q9HAV7	Q9HAV7	2	0.83	Q9HAV7
FXR1	Q5R370	Q5R370	9	0.704	Q9HB71
FXR1	Q9HC38-2	Q9HC38	4	0.914	Q9HC38
FXR1	Q9HCK5	Q9HCK5	3	0.884	Q9HCK5
FXR1	Q9HCM7	Q9HCM7	2	0.796	Q9HCM7
FXR1	Q9HCU5	Q9HCU5	2	0.874	Q9HCU5
FXR1	Q9NPD8	Q9NPD8	2	0.86	Q9NPD8
FXR1	Q9NPJ8-3	Q9NPJ8	2	0.86	Q9NPJ8
FXR1	Q9NQ88	Q9NQ88	3	0.87	Q9NQ88
FXR1	Q9NQG5	Q9NQG5	3	0.862	Q9NQG5
FXR1	Q9NQP4	Q9NQP4	2	0.888	Q9NQP4
FXR1	Q9NQR4	Q9NQR4	3	0.884	Q9NQR4
FXR1	Q9NQT4	Q9NQT4	2	0.828	Q9NQT4
FXR1	F8VPJ2	F8VPJ2	2	0.862	Q9NQT8
FXR1	Q9NQW6	Q9NQW6	4	0.922	Q9NQW6
FXR1	Q9NR31	Q9NR31	2	0.902	Q9NR31
FXR1	Q9NR45	Q9NR45	8	0.964	Q9NR45
FXR1	Q9NR56	Q9NR56	2	0.842	Q9NR56
FXR1	Q9NRF9	Q9NRF9	2	0.88	Q9NRF9
FXR1	Q9NRL2	Q9NRL2	5	0.974	Q9NRL2
FXR1	Q9NRN7	Q9NRN7	9	0.768	Q9NRN7
FXR1	Q9NRX1	Q9NRX1	4	0.934	Q9NRX1
FXR1	Q9NRX4	Q9NRX4	2	0.882	Q9NRX4
FXR1	Q9NS86	Q9NS86	2	0.866	Q9NS86
FXR1	Q9NS87-2	Q9NS87	3	0.89	Q9NS87
FXR1	Q9NSD9	Q9NSD9	15	0.718	Q9NSD9
FXR1	Q9NT62	Q9NT62	3	0.872	Q9NT62
FXR1	Q9NTJ3	Q9NTJ3	11	0.98	Q9NTJ3
FXR1	Q9NTZ6	Q9NTZ6	3	0.858	Q9NTZ6
FXR1	Q9NUP9	Q9NUP9	6	0.97	Q9NUP9
FXR1	Q9NUQ7	Q9NUQ7	2	0.86	Q9NUQ7
FXR1	Q9NUQ8	Q9NUQ8	5	0.938	Q9NUQ8
FXR1	Q9NUQ9	Q9NUQ9	4	0.9	Q9NUQ9
FXR1	Q9NV35	Q9NV35	2	0.854	Q9NV35
FXR1	Q9NVE7	Q9NVE7	2	0.83	Q9NVE7
FXR1	Q9NVI1-1	Q9NVI1	3	0.876	Q9NVI1
FXR1	Q9NVU7	Q9NVU7	2	0.85	Q9NVU7
FXR1	Q9NWH9	Q9NWH9	4	0.938	Q9NWH9
FXR1	Q9NWT1	Q9NWT1	3	0.878	Q9NWT1
FXR1	Q9NWV4	Q9NWV4	2	0.866	Q9NWV4
FXR1	Q9NX02-2	Q9NX02	12	0.992	Q9NX02
FXR1	Q9NX58	Q9NX58	2	0.872	Q9NX58
FXR1	Q9NX63	Q9NX63	5	0.944	Q9NX63
FXR1	Q9NXF1	Q9NXF1	2	0.83	Q9NXF1
FXR1	Q9NXG2	Q9NXG2	2	0.86	Q9NXG2
FXR1	Q9NY93	Q9NY93	5	0.95	Q9NY93
FXR1	Q9NYF8-2	Q9NYF8	3	0.898	Q9NYF8
FXR1	Q9NYH9	Q9NYH9	2	0.844	Q9NYH9
FXR1	Q9NYT0	Q9NYT0	2	0.852	Q9NYT0
FXR1	Q9NZ01	Q9NZ01	4	0.906	Q9NZ01
FXR1	Q9NZB2	Q9NZB2	13	0.986	Q9NZB2
FXR1	Q9NZL4	Q9NZL4	3	0.902	Q9NZL4
FXR1	Q9NZM1-6	Q9NZM1	67	1	Q9NZM1
FXR1	Q9NZN4	Q9NZN4	4	0.922	Q9NZN4
FXR1	Q9NZZ3	Q9NZZ3	2	0.856	Q9NZZ3
FXR1	Q9P013	Q9P013	3	0.894	Q9P013
FXR1	Q9P035	Q9P035	2	0.86	Q9P035
FXR1	Q9P0I2	Q9P0I2	2	0.844	Q9P0I2
FXR1	Q9P0J7	Q9P0J7	2	0.848	Q9P0J7
FXR1	Q9P0L0	Q9P0L0	7	0.708	Q9P0L0
FXR1	Q9P1A2	Q9P1A2	3	0.892	Q9P1A2
FXR1	Q9P258	Q9P258	8	0.97	Q9P258
FXR1	Q9P2M7	Q9P2M7	13	0.986	Q9P2M7
FXR1	Q9P2R3-2	Q9P2R3	2	0.87	Q9P2R3
FXR1	Q9UBB4	Q9UBB4	4	0.922	Q9UBB4
FXR1	Q9UBD5-3	Q9UBD5	2	0.826	Q9UBD5
FXR1	Q9UBE0	Q9UBE0	5	0.926	Q9UBE0
FXR1	Q9UBF2	Q9UBF2	5	0.954	Q9UBF2
FXR1	Q9UBM7	Q9UBM7	5	0.934	Q9UBM7
FXR1	Q9UD71-2	Q9UD71	5	0.92	Q9UD71
FXR1	Q9UDT6	Q9UDT6	3	0.898	Q9UDT6
FXR1	Q9UDW1	Q9UDW1	2	0.916	Q9UDW1
FXR1	Q9UDY2-7	Q9UDY2	13	0.998	Q9UDY2
FXR1	Q9UEW8	Q9UEW8	3	0.908	Q9UEW8
FXR1	Q9UEY8	Q9UEY8	2	0.818	Q9UEY8
FXR1	Q9UG63	Q9UG63	7	0.946	Q9UG63
FXR1	Q9UGP8	Q9UGP8	2	0.846	Q9UGP8
FXR1	Q9UH17	Q9UH17	7	0.954	Q9UH17
FXR1	Q9UHB6	Q9UHB6	60	1	Q9UHB6
FXR1	Q9UHB9	Q9UHB9	5	0.952	Q9UHB9
FXR1	Q9UHD1	Q9UHD1	10	0.982	Q9UHD1
FXR1	Q9UHD8-3	Q9UHD8	3	0.89	Q9UHD8
FXR1	Q9UHR4	Q9UHR4	4	0.934	Q9UHR4
FXR1	Q9UHV9	Q9UHV9	2	0.872	Q9UHV9
FXR1	Q9UHX1-3	Q9UHX1	9	0.976	Q9UHX1
FXR1	Q9UHY1	Q9UHY1	2	0.828	Q9UHY1
FXR1	Q9UI10-2	Q9UI10	3	0.896	Q9UI10
FXR1	Q9UI12-2	Q9UI12	2	0.852	Q9UI12
FXR1	Q9UI15	Q9UI15	2	0.87	Q9UI15
FXR1	Q9UI33-3	Q9UI33	2	0.886	Q9UI33
FXR1	Q9UIA9	Q9UIA9	7	0.976	Q9UIA9
FXR1	Q9UID3	Q9UID3	2	0.786	Q9UID3
FXR1	Q9UII2	Q9UII2	2	0.874	Q9UII2
FXR1	Q9UIV1-2	Q9UIV1	2	0.862	Q9UIV1
FXR1	Q9UJ70	Q9UJ70	6	0.952	Q9UJ70
FXR1	Q9UJ72	Q9UJ72	2	0.834	Q9UJ72
FXR1	Q9UJS0-2	Q9UJS0	7	0.93	Q9UJS0
FXR1	Q9UJU6	Q9UJU6	11	0.984	Q9UJU6
FXR1	Q9UJV9	Q9UJV9	2	0.828	Q9UJV9
FXR1	Q9UJZ1	Q9UJZ1	11	0.988	Q9UJZ1
FXR1	Q9UK45	Q9UK45	2	0.904	Q9UK45
FXR1	Q9UKF6	Q9UKF6	2	0.868	Q9UKF6
FXR1	Q9UKK3	Q9UKK3	5	0.934	Q9UKK3
FXR1	Q9UKN8	Q9UKN8	2	0.81	Q9UKN8
FXR1	Q9UKY7	Q9UKY7	2	0.868	Q9UKY7
FXR1	Q9UKZ9	Q9UKZ9	4	0.89	Q9UKZ9
FXR1	Q9UL25	Q9UL25	6	0.956	Q9UL25
FXR1	Q9UL46	Q9UL46	3	0.902	Q9UL46
FXR1	Q9ULC4-3	Q9ULC4	2	0.844	Q9ULC4
FXR1	Q9ULC5-3	Q9ULC5	3	0.89	Q9ULC5
FXR1	Q9ULD2	Q9ULD2	4	0.942	Q9ULD2
FXR1	A7MAP1	A7MAP1	11	0.984	Q9ULV4
FXR1	Q9ULW0	Q9ULW0	2	0.83	Q9ULW0
FXR1	Q9ULZ3-3	Q9ULZ3	4	0.908	Q9ULZ3
FXR1	Q9UM54-6	Q9UM54	7	0.964	Q9UM54
FXR1	Q9UN37	Q9UN37	2	0.828	Q9UN37
FXR1	Q9UNF0	Q9UNF0	2	0.858	Q9UNF0
FXR1	Q9UNM6	Q9UNM6	8	0.958	Q9UNM6
FXR1	Q9UNS2	Q9UNS2	4	0.92	Q9UNS2
FXR1	Q9UNX4	Q9UNX4	4	0.944	Q9UNX4
FXR1	Q9UPN4-2	Q9UPN4	2	0.836	Q9UPN4
FXR1	Q9UQB8-5	Q9UQB8	9	0.978	Q9UQB8
FXR1	Q9UQE7	Q9UQE7	17	0.984	Q9UQE7
FXR1	Q9UQN3	Q9UQN3	2	0.878	Q9UQN3
FXR1	Q9Y221-2	Q9Y221	5	0.944	Q9Y221
FXR1	Q9Y224	Q9Y224	12	0.998	Q9Y224
FXR1	Q9Y263	Q9Y263	4	0.926	Q9Y263
FXR1	Q9Y265	Q9Y265	30	0.886	Q9Y265
FXR1	Q9Y277-2	Q9Y277	5	0.932	Q9Y277
FXR1	Q9Y285	Q9Y285	7	0.952	Q9Y285
FXR1	Q9Y2A7	Q9Y2A7	3	0.882	Q9Y2A7
FXR1	Q9Y2K7-2	Q9Y2K7	3	0.89	Q9Y2K7
FXR1	Q9Y2L1	Q9Y2L1	4	0.942	Q9Y2L1
FXR1	Q9Y2S7	Q9Y2S7	4	0.934	Q9Y2S7
FXR1	Q9Y2X7-3	Q9Y2X7	6	0.942	Q9Y2X7
FXR1	Q9Y2Z0	Q9Y2Z0	9	0.958	Q9Y2Z0
FXR1	Q9Y2Z4	Q9Y2Z4	2	0.846	Q9Y2Z4
FXR1	Q9Y314	Q9Y314	5	0.938	Q9Y314
FXR1	Q9Y315	Q9Y315	3	0.902	Q9Y315
FXR1	Q5R2V8	Q5R2V8	3	0.902	Q9Y316
FXR1	Q9Y333	Q9Y333	2	0.92	Q9Y333
FXR1	Q9Y376	Q9Y376	4	0.914	Q9Y376
FXR1	Q9Y383	Q9Y383	7	0.954	Q9Y383
FXR1	Q9Y3A3-3	Q9Y3A3	2	0.842	Q9Y3A3
FXR1	Q9Y3A4	Q9Y3A4	2	0.872	Q9Y3A4
FXR1	Q9Y3A5	Q9Y3A5	8	0.988	Q9Y3A5
FXR1	Q9Y3B4	Q9Y3B4	2	0.888	Q9Y3B4
FXR1	Q9Y3C1	Q9Y3C1	6	0.98	Q9Y3C1
FXR1	Q9Y3F4	Q9Y3F4	15	1	Q9Y3F4
FXR1	Q9Y3T9	Q9Y3T9	2	0.838	Q9Y3T9
FXR1	Q9Y4G6	Q9Y4G6	9	0.986	Q9Y4G6
FXR1	Q9Y4L1	Q9Y4L1	6	0.968	Q9Y4L1
FXR1	Q9Y4P3	Q9Y4P3	4	0.898	Q9Y4P3
FXR1	Q9Y4W2-4	Q9Y4W2	2	0.86	Q9Y4W2
FXR1	Q9Y520-2	Q9Y520	5	0.926	Q9Y520
FXR1	Q9Y570-2	Q9Y570	3	0.886	Q9Y570
FXR1	Q9Y5J1	Q9Y5J1	4	0.948	Q9Y5J1
FXR1	Q9Y5K6	Q9Y5K6	14	0.98	Q9Y5K6
FXR1	Q9Y5L0	Q9Y5L0	6	0.956	Q9Y5L0
FXR1	Q9Y5S9	Q9Y5S9	4	0.944	Q9Y5S9
FXR1	Q9Y5X1	Q9Y5X1	3	0.916	Q9Y5X1
FXR1	Q9Y5X3	Q9Y5X3	3	0.896	Q9Y5X3
FXR1	Q9Y678	Q9Y678	51	0.956	Q9Y678
FXR1	Q9Y679-3	Q9Y679	2	0.844	Q9Y679
FXR1	Q9Y6A5	Q9Y6A5	2	0.852	Q9Y6A5
FXR1	Q9Y6C9	Q9Y6C9	2	0.886	Q9Y6C9
FXR1	Q9Y6E2	Q9Y6E2	13	0.984	Q9Y6E2
FXR1	Q9Y6M1-1	Q9Y6M1	7	0.96	Q9Y6M1
FXR1	Q9Y6Q5	Q9Y6Q5	8	0.956	Q9Y6Q5
FXR1	Q9Y6Y8-2	Q9Y6Y8	2	0.852	Q9Y6Y8

## Sheet: FXR1_H358_Entry
Table S1: FXR1 potential interacting proteins predicted by ChIP-MS in KATOIII and H358 cell lines
Saint Bait	Prey	Entry	Total Spec	Max SAINT	Entry_Database
FXR1	A0AV96	A0AV96	3	0.914	A0AV96
FXR1	A5YKK6	A5YKK6	18	0.996	A5YKK6
FXR1	A6NHR9	A6NHR9	2	0.904	A6NHR9
FXR1	A6NJA2	A6NJA2	2	0.89	A6NJA2
FXR1	A8MQB8	A8MQB8	37	0.998	A8MQB8
FXR1	B1AK88	B1AK88	4	0.95	B1AK88
FXR1	B3KNT8	B3KNT8	2	0.886	B3KNT8
FXR1	B3KP96	B3KP96	3	0.924	B3KP96
FXR1	B4DDM6	B4DDM6	5	0.954	B4DDM6
FXR1	B4DJV2	B4DJV2	2	0.902	B4DJV2
FXR1	B4DLW8	B4DLW8	44	0.952	B4DLW8
FXR1	B4DNE4	B4DNE4	3	0.898	B4DNE4
FXR1	B4DP52	B4DP52	3	0.932	B4DP52
FXR1	B4DT67	B4DT67	2	0.912	B4DT67
FXR1	B4DTG6	B4DTG6	3	0.932	B4DTG6
FXR1	B4DUA4	B4DUA4	2	0.918	B4DUA4
FXR1	B4DUA9	B4DUA9	2	0.906	B4DUA9
FXR1	B4DUT8	B4DUT8	3	0.928	B4DUT8
FXR1	B4DWW4	B4DWW4	3	0.926	B4DWW4
FXR1	B5MCF9	B5MCF9	2	0.872	B5MCF9
FXR1	B5MDF5	B5MDF5	14	0.996	B5MDF5
FXR1	B5ME19	B5ME19	9	0.978	B5ME19
FXR1	B7ZAR1	B7ZAR1	8	0.986	B7ZAR1
FXR1	B8ZZJ9	B8ZZJ9	2	0.908	B8ZZJ9
FXR1	B9A067	B9A067	5	0.956	B9A067
FXR1	B9ZVX0	B9ZVX0	9	0.998	B9ZVX0
FXR1	C9JIS1	C9JIS1	4	0.934	C9JIS1
FXR1	C9JYS8	C9JYS8	2	0.914	C9JYS8
FXR1	C9JZD1	C9JZD1	2	0.866	C9JZD1
FXR1	D3DQV9	D3DQV9	6	0.976	D3DQV9
FXR1	D6R9Z1	D6R9Z1	2	0.904	D6R9Z1
FXR1	D6RAN4	D6RAN4	4	0.942	D6RAN4
FXR1	D6RBD7	D6RBD7	2	0.896	D6RBD7
FXR1	D6RBZ0	D6RBZ0	8	0.992	D6RBZ0
FXR1	D6RF83	D6RF83	2	0.884	D6RF83
FXR1	D6RHZ5	D6RHZ5	3	0.906	D6RHZ5
FXR1	E1P5S2	E1P5S2	2	0.894	E1P5S2
FXR1	E2QRB9	E2QRB9	2	0.898	E2QRB9
FXR1	E7EMB3	E7EMB3	5	0.946	E7EMB3
FXR1	E7EQL5	E7EQL5	2	0.886	E7EQL5
FXR1	E7EVD1	E7EVD1	2	0.932	E7EVD1
FXR1	E7EX17	E7EX17	2	0.896	E7EX17
FXR1	E9PEB5	E9PEB5	13	0.992	E9PEB5
FXR1	E9PGC0	E9PGC0	5	0.96	E9PGC0
FXR1	E9PI68	E9PI68	2	0.886	E9PI68
FXR1	E9PK25	E9PK25	15	0.994	E9PK25
FXR1	E9PKG1	E9PKG1	8	0.986	E9PKG1
FXR1	E9PLL6	E9PLL6	7	0.978	E9PLL6
FXR1	E9PPU0	E9PPU0	46	1	E9PPU0
FXR1	F2Z2V0	F2Z2V0	3	0.926	F2Z2V0
FXR1	F5GY37	F5GY37	8	0.978	F5GY37
FXR1	F5GYN4	F5GYN4	6	0.972	F5GYN4
FXR1	F5GYQ2	F5GYQ2	2	0.92	F5GYQ2
FXR1	F5H047	F5H047	3	0.906	F5H047
FXR1	F5H1X8	F5H1X8	2	0.918	F5H1X8
FXR1	F5H2F4	F5H2F4	17	0.998	F5H2F4
FXR1	F5H2F9	F5H2F9	2	0.91	F5H2F9
FXR1	F5H3I4	F5H3I4	5	0.938	F5H3I4
FXR1	F5H5Y3	F5H5Y3	7	0.966	F5H5Y3
FXR1	F5H698	F5H698	15	0.996	F5H698
FXR1	F5H7U0	F5H7U0	12	0.994	F5H7U0
FXR1	F5H897	F5H897	4	0.95	F5H897
FXR1	F8VPV9	F8VPV9	3	0.938	F8VPV9
FXR1	F8VVA7	F8VVA7	2	0.9	F8VVA7
FXR1	F8VWC5	F8VWC5	11	0.994	F8VWC5
FXR1	F8VXU5	F8VXU5	3	0.928	F8VXU5
FXR1	F8VZJ2	F8VZJ2	3	0.916	F8VZJ2
FXR1	F8VZQ9	F8VZQ9	2	0.914	F8VZQ9
FXR1	F8W845	F8W845	4	0.948	F8W845
FXR1	F8W950	F8W950	2	0.876	F8W950
FXR1	F8W9N7	F8W9N7	2	0.934	F8W9N7
FXR1	G3V2N3	G3V2N3	2	0.884	G3V2N3
FXR1	G3V2Q1	G3V2Q1	7	0.98	G3V2Q1
FXR1	G3V576	G3V576	24	0.994	G3V576
FXR1	G5E972	G5E972	5	0.964	G5E972
FXR1	G5E9E7	G5E9E7	3	0.906	G5E9E7
FXR1	G5E9R5	G5E9R5	4	0.93	G5E9R5
FXR1	H0Y9J5	H0Y9J5	2	0.92	H0Y9J5
FXR1	H0YEH2	H0YEH2	3	0.918	H0YEH2
FXR1	H0YIV4	H0YIV4	2	0.93	H0YIV4
FXR1	H0YM23	H0YM23	2	0.898	H0YM23
FXR1	H0YMF4	H0YMF4	6	0.97	H0YMF4
FXR1	H0YMZ1	H0YMZ1	2	0.894	H0YMZ1
FXR1	H0YNW5	H0YNW5	5	0.944	H0YNW5
FXR1	H3BRK3	H3BRK3	2	0.886	H3BRK3
FXR1	H3BRS6	H3BRS6	2	0.878	H3BRS6
FXR1	H3BV85	H3BV85	2	0.894	H3BV85
FXR1	H7C3I1	H7C3I1	4	0.94	H7C3I1
FXR1	I3L504	I3L504	10	0.988	I3L504
FXR1	J3KND3	J3KND3	7	0.972	J3KND3
FXR1	J3KQU9	J3KQU9	3	0.916	J3KQU9
FXR1	J3KTF8	J3KTF8	2	0.9	J3KTF8
FXR1	J3QL05	J3QL05	6	0.966	J3QL05
FXR1	J3QQV1	J3QQV1	23	0.996	J3QQV1
FXR1	J3QR09	J3QR09	10	0.7	J3QR09
FXR1	K7EQ71	K7EQ71	3	0.932	K7EQ71
FXR1	K7ERI7	K7ERI7	6	0.954	K7ERI7
FXR1	K7ERT8	K7ERT8	41	1	K7ERT8
FXR1	K7ESG5	K7ESG5	2	0.898	K7ESG5
FXR1	M0QYT3	M0QYT3	4	0.948	M0QYT3
FXR1	M0R0R2	M0R0R2	4	0.95	M0R0R2
FXR1	M0R1A7	M0R1A7	2	0.916	M0R1A7
FXR1	M0R2S1	M0R2S1	4	0.954	M0R2S1
FXR1	M0R3D6	M0R3D6	13	0.996	M0R3D6
FXR1	O00148	O00148	5	0.958	O00148
FXR1	O00151	O00151	7	0.974	O00151
FXR1	O00203	O00203	2	0.778	O00203
FXR1	O00299	O00299	6	0.976	O00299
FXR1	O00303	O00303	3	0.916	O00303
FXR1	O00410	O00410	15	0.996	O00410
FXR1	O00487	O00487	2	0.896	O00487
FXR1	O00567	O00567	7	0.942	O00567
FXR1	O00571	O00571	34	1	O00571
FXR1	O00762	O00762	2	0.92	O00762
FXR1	O14602	O14602	3	0.93	O14602
FXR1	O14617	O14617	2	0.892	O14617
FXR1	O14818	O14818	2	0.92	O14818
FXR1	O14950	O14950	9	0.988	O14950
FXR1	O14979	O14979	15	0.988	O14979
FXR1	O14980	O14980	16	0.99	O14980
FXR1	O15042	O15042	2	0.9	O15042
FXR1	O15143	O15143	4	0.942	O15143
FXR1	O15144	O15144	2	0.914	O15144
FXR1	O15355	O15355	2	0.906	O15355
FXR1	O15371	O15371	4	0.95	O15371
FXR1	O43175	O43175	5	0.942	O43175
FXR1	O43237	O43237	2	0.904	O43237
FXR1	O43242	O43242	3	0.92	O43242
FXR1	O43592	O43592	3	0.922	O43592
FXR1	O43707	O43707	39	1	O43707
FXR1	O43795	O43795	5	0.964	O43795
FXR1	O43809	O43809	4	0.952	O43809
FXR1	O60231	O60231	7	0.95	O60231
FXR1	O60264	O60264	8	0.964	O60264
FXR1	O60506	O60506	10	0.98	O60506
FXR1	O60716	O60716	13	1	O60716
FXR1	O60884	O60884	2	0.9	O60884
FXR1	O75083	O75083	20	0.87	O75083
FXR1	O75131	O75131	3	0.932	O75131
FXR1	O75340	O75340	2	0.902	O75340
FXR1	O75367	O75367	10	0.994	O75367
FXR1	O75369	O75369	43	0.998	O75369
FXR1	O75531	O75531	3	0.97	O75531
FXR1	O75534	O75534	12	0.994	O75534
FXR1	O75643	O75643	26	0.998	O75643
FXR1	O75694	O75694	7	0.978	O75694
FXR1	O75717	O75717	2	0.796	O75717
FXR1	O75821	O75821	3	0.936	O75821
FXR1	O76021	O76021	3	0.914	O76021
FXR1	O76094	O76094	8	0.974	O76094
FXR1	O94905	O94905	2	0.876	O94905
FXR1	O94906	O94906	2	0.86	O94906
FXR1	O95347	O95347	3	0.906	O95347
FXR1	O95372	O95372	3	0.93	O95372
FXR1	O95373	O95373	3	0.932	O95373
FXR1	O95433	O95433	3	0.934	O95433
FXR1	O95573	O95573	2	0.872	O95573
FXR1	P00338	P00338	18	0.998	P00338
FXR1	P00558	P00558	62	1	P00558
FXR1	P02766	P02766	2	0.912	P02766
FXR1	P02786	P02786	6	0.926	P02786
FXR1	P04075	P04075	38	0.998	P04075
FXR1	P04083	P04083	28	0.73	P04083
FXR1	P04406	P04406	25	0.998	P04406
FXR1	P04843	P04843	7	0.96	P04843
FXR1	P04844	P04844	2	0.912	P04844
FXR1	P05161	P05161	2	0.918	P05161
FXR1	P06493	P06493	3	0.914	P06493
FXR1	P06703	P06703	6	0.97	P06703
FXR1	P06730	P06730	3	0.932	P06730
FXR1	P06737	P06737	7	0.97	P06737
FXR1	P06744	P06744	4	0.932	P06744
FXR1	P07195	P07195	11	0.994	P07195
FXR1	P07355	P07355	5	0.954	P07355
FXR1	P07737	P07737	12	0.988	P07737
FXR1	P07814	P07814	18	0.994	P07814
FXR1	P08237	P08237	3	0.924	P08237
FXR1	P08758	P08758	7	0.97	P08758
FXR1	P08865	P08865	13	0.998	P08865
FXR1	P09382	P09382	4	0.97	P09382
FXR1	P09661	P09661	4	0.96	P09661
FXR1	P09960	P09960	2	0.914	P09960
FXR1	P09972	P09972	6	0.938	P09972
FXR1	P0CF74	P0CF74	2	0.922	P0CF74
FXR1	P10515	P10515	3	0.922	P10515
FXR1	P11216	P11216	19	0.99	P11216
FXR1	P11387	P11387	10	0.962	P11387
FXR1	P11388	P11388	18	1	P11388
FXR1	P11413	P11413	9	0.99	P11413
FXR1	P11586	P11586	12	0.98	P11586
FXR1	P11908	P11908	3	0.942	P11908
FXR1	P11940	P11940	12	0.99	P11940
FXR1	P12004	P12004	4	0.948	P12004
FXR1	P12268	P12268	3	0.928	P12268
FXR1	P12277	P12277	47	1	P12277
FXR1	P12429	P12429	2	0.902	P12429
FXR1	P12814	P12814	21	1	P12814
FXR1	P13489	P13489	3	0.93	P13489
FXR1	P13639	P13639	57	1	P13639
FXR1	P14174	P14174	4	0.972	P14174
FXR1	P14625	P14625	7	0.964	P14625
FXR1	P14923	P14923	8	0.964	P14923
FXR1	P15153	P15153	3	0.944	P15153
FXR1	J3KQG6	J3KQG6	5	0.952	P15170
FXR1	P15311	P15311	24	1	P15311
FXR1	P15531	P15531	16	0.996	P15531
FXR1	P16144	P16144	2	0.898	P16144
FXR1	P16615	P16615	14	0.996	P16615
FXR1	P16949	P16949	2	0.932	P16949
FXR1	P17096	P17096	2	0.892	P17096
FXR1	P17655	P17655	2	0.9	P17655
FXR1	P17858	P17858	3	0.926	P17858
FXR1	P17931	P17931	8	0.992	P17931
FXR1	P17987	P17987	8	0.968	P17987
FXR1	P18085	P18085	9	0.988	P18085
FXR1	P18206	P18206	9	0.95	P18206
FXR1	J3QL51	J3QL51	18	0.998	P18621
FXR1	P18754	P18754	5	0.952	P18754
FXR1	P20042	P20042	3	0.916	P20042
FXR1	P20700	P20700	36	0.906	P20700
FXR1	P22102	P22102	6	0.946	P22102
FXR1	P22234	P22234	12	0.994	P22234
FXR1	P22314	P22314	3	0.9	P22314
FXR1	P23284	P23284	4	0.958	P23284
FXR1	P23526	P23526	23	0.998	P23526
FXR1	P25205	P25205	11	0.97	P25205
FXR1	P25788	P25788	2	0.898	P25788
FXR1	P26038	P26038	15	0.988	P26038
FXR1	P26196	P26196	8	0.96	P26196
FXR1	P26368	P26368	7	0.976	P26368
FXR1	P26583	P26583	9	0.994	P26583
FXR1	P26599	P26599	19	0.988	P26599
FXR1	P27348	P27348	15	0.996	P27348
FXR1	P27695	P27695	6	0.964	P27695
FXR1	P27708	P27708	23	0.996	P27708
FXR1	P28066	P28066	2	0.922	P28066
FXR1	P29317	P29317	2	0.87	P29317
FXR1	P29373	P29373	13	0.996	P29373
FXR1	P29401	P29401	25	1	P29401
FXR1	P29692	P29692	15	0.996	P29692
FXR1	P30041	P30041	5	0.986	P30041
FXR1	P30044	P30044	4	0.956	P30044
FXR1	P30101	P30101	2	0.902	P30101
FXR1	P30520	P30520	2	0.872	P30520
FXR1	P31146	P31146	3	0.932	P31146
FXR1	P31939	P31939	5	0.942	P31939
FXR1	P31942	P31942	6	0.974	P31942
FXR1	P31946	P31946	14	0.994	P31946
FXR1	P31947	P31947	11	0.992	P31947
FXR1	P31948	P31948	12	0.992	P31948
FXR1	P32119	P32119	11	0.996	P32119
FXR1	P32322	P32322	4	0.942	P32322
FXR1	P33176	P33176	7	0.95	P33176
FXR1	P33991	P33991	8	0.966	P33991
FXR1	P33992	P33992	7	0.958	P33992
FXR1	P33993	P33993	19	0.996	P33993
FXR1	P35080	P35080	2	0.926	P35080
FXR1	P35222	P35222	5	0.952	P35222
FXR1	P35232	P35232	7	0.988	P35232
FXR1	P35241	P35241	9	0.968	P35241
FXR1	P35580	P35580	23	0.994	P35580
FXR1	P35606	P35606	2	0.824	P35606
FXR1	P35637	P35637	15	0.99	P35637
FXR1	P35659	P35659	5	0.968	P35659
FXR1	P37108	P37108	2	0.938	P37108
FXR1	P37802	P37802	14	0.994	P37802
FXR1	P38159	P38159	21	1	P38159
FXR1	P38919	P38919	14	1	P38919
FXR1	P39656	P39656	5	0.944	P39656
FXR1	P39687	P39687	3	0.95	P39687
FXR1	P39748	P39748	3	0.926	P39748
FXR1	P40121	P40121	3	0.922	P40121
FXR1	P40227	P40227	12	0.994	P40227
FXR1	P40926	P40926	3	0.918	P40926
FXR1	P40939	P40939	8	0.98	P40939
FXR1	P41091	P41091	12	0.994	P41091
FXR1	P41252	P41252	20	0.988	P41252
FXR1	P42166	P42166	3	0.942	P42166
FXR1	P42224	P42224	2	0.888	P42224
FXR1	P42285	P42285	3	0.928	P42285
FXR1	P42704	P42704	20	0.998	P42704
FXR1	P43243	P43243	17	0.994	P43243
FXR1	P43246	P43246	5	0.966	P43246
FXR1	P43487	P43487	3	0.936	P43487
FXR1	P45974	P45974	2	0.87	P45974
FXR1	P46060	P46060	2	0.928	P46060
FXR1	P46087	P46087	4	0.942	P46087
FXR1	P46940	P46940	17	0.984	P46940
FXR1	P47897	P47897	5	0.936	P47897
FXR1	P48444	P48444	7	0.964	P48444
FXR1	P49327	P49327	206	0.926	P49327
FXR1	P49368	P49368	12	0.994	P49368
FXR1	P49411	P49411	7	0.958	P49411
FXR1	P49588	P49588	6	0.966	P49588
FXR1	P49720	P49720	2	0.92	P49720
FXR1	P49721	P49721	2	0.9	P49721
FXR1	P49736	P49736	9	0.972	P49736
FXR1	P49773	P49773	3	0.944	P49773
FXR1	P50990	P50990	14	0.992	P50990
FXR1	P50991	P50991	9	0.98	P50991
FXR1	P51114	P51114	2	0.886	P51114
FXR1	P51116	P51116	18	0.992	P51116
FXR1	P51148	P51148	3	0.952	P51148
FXR1	P51149	P51149	3	0.92	P51149
FXR1	P51571	P51571	2	0.922	P51571
FXR1	P51648	P51648	2	0.906	P51648
FXR1	Q5SZ07	Q5SZ07	2	0.908	P51858
FXR1	P51991	P51991	23	0.996	P51991
FXR1	P52292	P52292	4	0.948	P52292
FXR1	P52943	P52943	8	0.994	P52943
FXR1	P53396	P53396	15	0.99	P53396
FXR1	P53618	P53618	2	0.88	P53618
FXR1	P53621	P53621	13	0.98	P53621
FXR1	P53999	P53999	5	0.972	P53999
FXR1	P54136	P54136	9	0.966	P54136
FXR1	P54886	P54886	2	0.842	P54886
FXR1	P55010	P55010	3	0.932	P55010
FXR1	P55060	P55060	13	0.98	P55060
FXR1	P55072	P55072	7	0.972	P55072
FXR1	P55084	P55084	3	0.908	P55084
FXR1	P55265	P55265	8	0.97	P55265
FXR1	P55769	P55769	3	0.962	P55769
FXR1	P55884	P55884	8	0.968	P55884
FXR1	P56192	P56192	10	0.976	P56192
FXR1	P59998	P59998	4	0.958	P59998
FXR1	P60174	P60174	7	0.978	P60174
FXR1	P60228	P60228	4	0.942	P60228
FXR1	P60842	P60842	29	1	P60842
FXR1	P60903	P60903	7	0.972	P60903
FXR1	P60953	P60953	4	0.95	P60953
FXR1	P60981	P60981	6	0.984	P60981
FXR1	P61019	P61019	2	0.918	P61019
FXR1	P61026	P61026	7	0.984	P61026
FXR1	P61081	P61081	5	0.978	P61081
FXR1	P61106	P61106	5	0.966	P61106
FXR1	P61158	P61158	5	0.932	P61158
FXR1	P61160	P61160	7	0.954	P61160
FXR1	P61204	P61204	8	0.988	P61204
FXR1	P61221	P61221	3	0.92	P61221
FXR1	P61224	P61224	2	0.896	P61224
FXR1	P61619	P61619	4	0.954	P61619
FXR1	P61758	P61758	2	0.88	P61758
FXR1	P61962	P61962	2	0.876	P61962
FXR1	P61981	P61981	14	0.996	P61981
FXR1	P62136	P62136	10	0.992	P62136
FXR1	P62140	P62140	9	0.99	P62140
FXR1	P62258	P62258	17	0.994	P62258
FXR1	P62304	P62304	3	0.946	P62304
FXR1	P62306	P62306	2	0.94	P62306
FXR1	P62330	P62330	2	0.918	P62330
FXR1	P62333	P62333	4	0.942	P62333
FXR1	P62847	P62847	10	0.776	P62847
FXR1	P62937	P62937	14	0.99	P62937
FXR1	P62995	P62995	4	0.96	P62995
FXR1	Q7Z451	Q7Z451	6	0.962	P63010
FXR1	P63151	P63151	2	0.904	P63151
FXR1	P63208	P63208	3	0.952	P63208
FXR1	P63244	P63244	19	1	P63244
FXR1	P67809	P67809	9	0.99	P67809
FXR1	P67936	P67936	6	0.98	P67936
FXR1	P68400	P68400	4	0.934	P68400
FXR1	P78347	P78347	10	0.988	P78347
FXR1	P78371	P78371	9	0.986	P78371
FXR1	P78527	P78527	96	1	P78527
FXR1	P84085	P84085	7	0.982	P84085
FXR1	P84103	P84103	6	0.98	P84103
FXR1	Q00341	Q00341	23	0.992	Q00341
FXR1	Q00688	Q00688	4	0.94	Q00688
FXR1	Q00796	Q00796	8	0.984	Q00796
FXR1	Q01081	Q01081	2	0.906	Q01081
FXR1	Q01082	Q01082	9	0.986	Q01082
FXR1	Q5VXV2	Q5VXV2	4	0.928	Q01105
FXR1	Q01780	Q01780	3	0.93	Q01780
FXR1	Q01813	Q01813	6	0.962	Q01813
FXR1	Q01844	Q01844	4	0.956	Q01844
FXR1	Q02790	Q02790	2	0.898	Q02790
FXR1	Q02880	Q02880	7	0.984	Q02880
FXR1	Q03169	Q03169	3	0.922	Q03169
FXR1	Q03252	Q03252	11	0.984	Q03252
FXR1	Q04446	Q04446	2	0.912	Q04446
FXR1	G5E9S1	G5E9S1	19	0.998	Q04637
FXR1	Q04917	Q04917	12	0.994	Q04917
FXR1	Q05639	Q05639	19	0.998	Q05639
FXR1	Q06210	Q06210	9	0.968	Q06210
FXR1	Q06787	Q06787	25	0.998	Q06787
FXR1	Q07021	Q07021	3	0.94	Q07021
FXR1	Q07666	Q07666	13	0.988	Q07666
FXR1	Q07955	Q07955	14	0.99	Q07955
FXR1	Q08945	Q08945	17	0.992	Q08945
FXR1	Q08J23	Q08J23	5	0.946	Q08J23
FXR1	Q09028	Q09028	4	0.936	Q09028
FXR1	Q09666	Q09666	98	0.998	Q09666
FXR1	Q12788	Q12788	5	0.944	Q12788
FXR1	Q12874	Q12874	2	0.866	Q12874
FXR1	Q12904	Q12904	2	0.892	Q12904
FXR1	Q12906	Q12906	15	0.996	Q12906
FXR1	Q13045	Q13045	2	0.908	Q13045
FXR1	Q13148	Q13148	6	0.966	Q13148
FXR1	Q13185	Q13185	8	0.986	Q13185
FXR1	Q13200	Q13200	6	0.956	Q13200
FXR1	Q13242	Q13242	4	0.956	Q13242
FXR1	Q13247	Q13247	6	0.962	Q13247
FXR1	Q13268	Q13268	24	0.996	Q13268
FXR1	Q13283	Q13283	6	0.976	Q13283
FXR1	Q13310	Q13310	12	0.994	Q13310
FXR1	Q13347	Q13347	2	0.898	Q13347
FXR1	Q13363	Q13363	3	0.912	Q13363
FXR1	Q13435	Q13435	3	0.918	Q13435
FXR1	Q13547	Q13547	5	0.95	Q13547
FXR1	Q13619	Q13619	5	0.956	Q13619
FXR1	Q13813	Q13813	4	0.934	Q13813
FXR1	Q14011	Q14011	3	0.964	Q14011
FXR1	Q14019	Q14019	2	0.938	Q14019
FXR1	Q14152	Q14152	20	0.99	Q14152
FXR1	Q14157	Q14157	26	0.998	Q14157
FXR1	Q14166	Q14166	4	0.926	Q14166
FXR1	Q14192	Q14192	2	0.908	Q14192
FXR1	Q14204	Q14204	55	1	Q14204
FXR1	Q14247	Q14247	5	0.956	Q14247
FXR1	Q14258	Q14258	4	0.95	Q14258
FXR1	Q14566	Q14566	10	0.964	Q14566
FXR1	Q14683	Q14683	5	0.958	Q14683
FXR1	Q14739	Q14739	2	0.896	Q14739
FXR1	Q14764	Q14764	2	0.844	Q14764
FXR1	Q14839	Q14839	7	0.966	Q14839
FXR1	Q14847	Q14847	5	0.962	Q14847
FXR1	Q14974	Q14974	8	0.952	Q14974
FXR1	Q14980	Q14980	3	0.926	Q14980
FXR1	Q15008	Q15008	2	0.892	Q15008
FXR1	Q15019	Q15019	4	0.95	Q15019
FXR1	Q15020	Q15020	2	0.874	Q15020
FXR1	Q15021	Q15021	4	0.938	Q15021
FXR1	Q15029	Q15029	9	0.982	Q15029
FXR1	Q15056	Q15056	4	0.95	Q15056
FXR1	Q15149	Q15149	375	1	Q15149
FXR1	Q15185	Q15185	5	0.986	Q15185
FXR1	Q15269	Q15269	3	0.902	Q15269
FXR1	Q15365	Q15365	25	0.922	Q15365
FXR1	Q15366	Q15366	14	1	Q15366
FXR1	Q15436	Q15436	2	0.892	Q15436
FXR1	Q15437	Q15437	3	0.902	Q15437
FXR1	Q15717	Q15717	4	0.97	Q15717
FXR1	Q16401	Q16401	3	0.932	Q16401
FXR1	Q16531	Q16531	2	0.834	Q16531
FXR1	Q16629	Q16629	5	0.96	Q16629
FXR1	Q16658	Q16658	15	0.996	Q16658
FXR1	Q27J81	Q27J81	7	0.966	Q27J81
FXR1	Q32Q12	Q32Q12	17	0.996	Q32Q12
FXR1	Q5JR07	Q5JR07	4	0.932	Q5JR07
FXR1	Q5JRI1	Q5JRI1	2	0.888	Q5JRI1
FXR1	Q5SSJ5	Q5SSJ5	3	0.942	Q5SSJ5
FXR1	Q5STZ7	Q5STZ7	2	0.888	Q5STZ7
FXR1	Q5T3Q7	Q5T3Q7	2	0.886	Q5T3Q7
FXR1	Q5T4S7	Q5T4S7	3	0.904	Q5T4S7
FXR1	Q5T7C4	Q5T7C4	10	0.982	Q5T7C4
FXR1	Q5TCU6	Q5TCU6	20	0.998	Q5TCU6
FXR1	Q5VY93	Q5VY93	4	0.944	Q5VY93
FXR1	Q5VYK3	Q5VYK3	3	0.912	Q5VYK3
FXR1	Q6EEV6	Q6EEV6	2	0.924	Q6EEV6
FXR1	Q6NXG1	Q6NXG1	6	0.954	Q6NXG1
FXR1	Q6P2E9	Q6P2E9	4	0.948	Q6P2E9
FXR1	Q7KZF4	Q7KZF4	17	0.994	Q7KZF4
FXR1	Q7L014	Q7L014	8	0.984	Q7L014
FXR1	Q7L1Q6	Q7L1Q6	8	0.98	Q7L1Q6
FXR1	Q7L2E3	Q7L2E3	3	0.936	Q7L2E3
FXR1	Q7L576	Q7L576	5	0.954	Q7L576
FXR1	Q7RTV0	Q7RTV0	2	0.92	Q7RTV0
FXR1	Q7Z2W4	Q7Z2W4	6	0.942	Q7Z2W4
FXR1	Q86UE4	Q86UE4	2	0.894	Q86UE4
FXR1	Q86UK7	Q86UK7	3	0.93	Q86UK7
FXR1	Q86VP6	Q86VP6	8	0.966	Q86VP6
FXR1	Q86XP3	Q86XP3	45	1	Q86XP3
FXR1	Q8N163	Q8N163	11	0.98	Q8N163
FXR1	Q8N1F7	Q8N1F7	6	0.958	Q8N1F7
FXR1	Q8NC51	Q8NC51	9	0.988	Q8NC51
FXR1	Q8NE71	Q8NE71	2	0.902	Q8NE71
FXR1	Q8TDN6	Q8TDN6	3	0.932	Q8TDN6
FXR1	Q8TEQ6	Q8TEQ6	8	0.97	Q8TEQ6
FXR1	Q8TEX9	Q8TEX9	7	0.978	Q8TEX9
FXR1	Q8WWM7	Q8WWM7	10	0.992	Q8WWM7
FXR1	Q8WXF1	Q8WXF1	4	0.942	Q8WXF1
FXR1	Q92499	Q92499	15	0.984	Q92499
FXR1	Q92572	Q92572	2	0.92	Q92572
FXR1	Q92598	Q92598	4	0.932	Q92598
FXR1	Q92616	Q92616	28	0.99	Q92616
FXR1	Q92621	Q92621	4	0.922	Q92621
FXR1	Q92688	Q92688	4	0.954	Q92688
FXR1	Q92747	Q92747	2	0.904	Q92747
FXR1	Q92841	Q92841	20	0.998	Q92841
FXR1	Q92900	Q92900	15	0.986	Q92900
FXR1	Q92945	Q92945	9	0.976	Q92945
FXR1	Q92973	Q92973	10	0.966	Q92973
FXR1	Q93084	Q93084	3	0.912	Q93084
FXR1	Q96A08	Q96A08	17	0.988	Q96A08
FXR1	Q96A72	Q96A72	5	0.972	Q96A72
FXR1	Q96AG4	Q96AG4	2	0.898	Q96AG4
FXR1	Q96B58	Q96B58	2	0.9	Q96B58
FXR1	Q96B97	Q96B97	2	0.882	Q96B97
FXR1	Q96FJ2	Q96FJ2	2	0.942	Q96FJ2
FXR1	Q96GQ7	Q96GQ7	3	0.922	Q96GQ7
FXR1	Q96HC4	Q96HC4	2	0.892	Q96HC4
FXR1	Q96HS1	Q96HS1	3	0.942	Q96HS1
FXR1	Q96I24	Q96I24	10	0.986	Q96I24
FXR1	Q96QK1	Q96QK1	4	0.954	Q96QK1
FXR1	Q96QV6	Q96QV6	11	0.984	Q96QV6
FXR1	Q96TA1	Q96TA1	2	0.888	Q96TA1
FXR1	Q99832	Q99832	10	0.988	Q99832
FXR1	Q99848	Q99848	3	0.922	Q99848
FXR1	Q9BQG0	Q9BQG0	3	0.942	Q9BQG0
FXR1	Q9BRA2	Q9BRA2	6	0.98	Q9BRA2
FXR1	Q9BSJ8	Q9BSJ8	2	0.85	Q9BSJ8
FXR1	Q9BTT0	Q9BTT0	7	0.974	Q9BTT0
FXR1	Q9BUJ2	Q9BUJ2	5	0.95	Q9BUJ2
FXR1	Q9BVP2	Q9BVP2	2	0.91	Q9BVP2
FXR1	Q9BXJ9	Q9BXJ9	3	0.932	Q9BXJ9
FXR1	Q9BXP5	Q9BXP5	2	0.902	Q9BXP5
FXR1	Q9BY77	Q9BY77	3	0.932	Q9BY77
FXR1	Q9BZE4	Q9BZE4	4	0.928	Q9BZE4
FXR1	Q9BZK7	Q9BZK7	3	0.918	Q9BZK7
FXR1	Q9H0A0	Q9H0A0	4	0.934	Q9H0A0
FXR1	Q9H0D6	Q9H0D6	10	0.994	Q9H0D6
FXR1	Q9H0U4	Q9H0U4	6	0.978	Q9H0U4
FXR1	Q9H361	Q9H361	3	0.93	Q9H361
FXR1	Q9H3U1	Q9H3U1	2	0.862	Q9H3U1
FXR1	Q9H6S3	Q9H6S3	2	0.914	Q9H6S3
FXR1	Q9HAV4	Q9HAV4	2	0.796	Q9HAV4
FXR1	Q5R370	Q5R370	4	0.936	Q9HB71
FXR1	Q9NPC6	Q9NPC6	2	0.914	Q9NPC6
FXR1	Q9NR30	Q9NR30	15	0.974	Q9NR30
FXR1	Q9NSD9	Q9NSD9	3	0.928	Q9NSD9
FXR1	Q9NTJ3	Q9NTJ3	2	0.768	Q9NTJ3
FXR1	Q9NTK5	Q9NTK5	6	0.966	Q9NTK5
FXR1	Q9NUQ6	Q9NUQ6	3	0.916	Q9NUQ6
FXR1	Q9NVI7	Q9NVI7	3	0.926	Q9NVI7
FXR1	Q9NVP1	Q9NVP1	6	0.948	Q9NVP1
FXR1	Q9NX63	Q9NX63	3	0.934	Q9NX63
FXR1	Q9NYF8	Q9NYF8	3	0.914	Q9NYF8
FXR1	Q9NZB2	Q9NZB2	5	0.964	Q9NZB2
FXR1	Q9NZM1	Q9NZM1	8	0.978	Q9NZM1
FXR1	Q9P0L0	Q9P0L0	3	0.936	Q9P0L0
FXR1	Q9P258	Q9P258	6	0.97	Q9P258
FXR1	Q9UGI8	Q9UGI8	2	0.89	Q9UGI8
FXR1	Q9UHD8	Q9UHD8	5	0.96	Q9UHD8
FXR1	Q9UHV9	Q9UHV9	2	0.912	Q9UHV9
FXR1	Q9UHX1	Q9UHX1	4	0.924	Q9UHX1
FXR1	Q9UIA9	Q9UIA9	2	0.846	Q9UIA9
FXR1	Q9UJZ1	Q9UJZ1	4	0.944	Q9UJZ1
FXR1	Q9UKV8	Q9UKV8	2	0.912	Q9UKV8
FXR1	A7MAP0	A7MAP0	8	0.984	Q9ULV4
FXR1	Q9UM54	Q9UM54	7	0.968	Q9UM54
FXR1	Q9UMS4	Q9UMS4	6	0.954	Q9UMS4
FXR1	Q9UN86	Q9UN86	6	0.964	Q9UN86
FXR1	Q9UNX4	Q9UNX4	3	0.944	Q9UNX4
FXR1	Q9UPN6	Q9UPN6	3	0.93	Q9UPN6
FXR1	Q9UQ80	Q9UQ80	7	0.976	Q9UQ80
FXR1	Q9UQE7	Q9UQE7	2	0.82	Q9UQE7
FXR1	Q9Y224	Q9Y224	7	0.966	Q9Y224
FXR1	Q9Y262	Q9Y262	3	0.932	Q9Y262
FXR1	Q9Y265	Q9Y265	10	0.982	Q9Y265
FXR1	Q9Y266	Q9Y266	4	0.942	Q9Y266
FXR1	Q9Y295	Q9Y295	4	0.92	Q9Y295
FXR1	Q9Y2L1	Q9Y2L1	2	0.82	Q9Y2L1
FXR1	Q9Y2X3	Q9Y2X3	5	0.944	Q9Y2X3
FXR1	Q9Y376	Q9Y376	2	0.92	Q9Y376
FXR1	Q9Y383	Q9Y383	3	0.92	Q9Y383
FXR1	Q9Y3B4	Q9Y3B4	3	0.98	Q9Y3B4
FXR1	Q9Y3C1	Q9Y3C1	4	0.952	Q9Y3C1
FXR1	Q9Y3I0	Q9Y3I0	7	0.964	Q9Y3I0
FXR1	Q9Y520	Q9Y520	5	0.96	Q9Y520
FXR1	Q9Y5A9	Q9Y5A9	3	0.92	Q9Y5A9
FXR1	Q9Y5B9	Q9Y5B9	24	0.998	Q9Y5B9
FXR1	Q9Y5S9	Q9Y5S9	2	0.902	Q9Y5S9
FXR1	Q9Y678	Q9Y678	3	0.93	Q9Y678
FXR1	Q9Y6E2	Q9Y6E2	7	0.972	Q9Y6E2

## Sheet: FXR1_KATOIII
Saint Bait	Prey	Entry_Database	Gene names	Protein names	Status	Length	Total Spec	Max SAINT
FXR1	P30508	P30508	HLA-C HLAC	HLA class I histocompatibility antigen, Cw-12 alpha chain (MHC class I antigen Cw*12)	reviewed	366	8	0.958
FXR1	P63151	P63151	PPP2R2A	Serine/threonine-protein phosphatase 2A 55 kDa regulatory subunit B alpha isoform (PP2A subunit B isoform B55-alpha) (PP2A subunit B isoform PR55-alpha) (PP2A subunit B isoform R2-alpha) (PP2A subunit B isoform alpha)	reviewed	447	6	0.96
FXR1	P31937	P31937	HIBADH	3-hydroxyisobutyrate dehydrogenase, mitochondrial (HIBADH) (EC 1.1.1.31)	reviewed	336	4	0.91
FXR1	P11171-2	P11171	EPB41 E41P	Protein 4.1 (P4.1) (4.1R) (Band 4.1) (EPB4.1)	reviewed	864	3	0.896
FXR1	P49902	P49902	NT5C2 NT5B NT5CP PNT5	Cytosolic purine 5'-nucleotidase (EC 3.1.3.5) (Cytosolic 5'-nucleotidase II)	reviewed	561	3	0.928
FXR1	P52209	P52209	PGD PGDH	6-phosphogluconate dehydrogenase, decarboxylating (EC 1.1.1.44)	reviewed	483	18	1
FXR1	Q8IZ83	Q8IZ83	ALDH16A1	Aldehyde dehydrogenase family 16 member A1	reviewed	802	5	0.948
FXR1	Q15758	Q15758	SLC1A5 ASCT2 M7V1 RDR RDRC	Neutral amino acid transporter B(0) (ATB(0)) (Baboon M7 virus receptor) (RD114/simian type D retrovirus receptor) (Sodium-dependent neutral amino acid transporter type 2) (Solute carrier family 1 member 5)	reviewed	541	12	0.98
FXR1	Q13131	Q13131	PRKAA1 AMPK1	5'-AMP-activated protein kinase catalytic subunit alpha-1 (AMPK subunit alpha-1) (EC 2.7.11.1) (Acetyl-CoA carboxylase kinase) (ACACA kinase) (EC 2.7.11.27) (Hydroxymethylglutaryl-CoA reductase kinase) (HMGCR kinase) (EC 2.7.11.31) (Tau-protein kinase PRK	reviewed	559	2	0.868
FXR1	Q9BTE6-3	Q9BTE6	AARSD1	Alanyl-tRNA editing protein Aarsd1 (Alanyl-tRNA synthetase domain-containing protein 1)	reviewed	412	2	0.842
FXR1	P00505	P00505	GOT2	Aspartate aminotransferase, mitochondrial (mAspAT) (EC 2.6.1.1) (EC 2.6.1.7) (Fatty acid-binding protein) (FABP-1) (Glutamate oxaloacetate transaminase 2) (Kynurenine aminotransferase 4) (Kynurenine aminotransferase IV) (Kynurenine--oxoglutarate transamin	reviewed	430	12	0.986
FXR1	Q9UH17	Q9UH17	APOBEC3B	DNA dC->dU-editing enzyme APOBEC-3B (A3B) (EC 3.5.4.-) (Phorbolin-1-related protein) (Phorbolin-2/3)	reviewed	382	7	0.954
FXR1	P28288	P28288	ABCD3 PMP70 PXMP1	ATP-binding cassette sub-family D member 3 (70 kDa peroxisomal membrane protein) (PMP70)	reviewed	659	12	0.974
FXR1	P61221	P61221	ABCE1 RLI RNASEL1 RNASELI RNS4I OK/SW-cl.40	ATP-binding cassette sub-family E member 1 (2'-5'-oligoadenylate-binding protein) (HuHP68) (RNase L inhibitor) (Ribonuclease 4 inhibitor) (RNS4I)	reviewed	599	12	0.976
FXR1	Q9UG63	Q9UG63	ABCF2 HUSSY-18	ATP-binding cassette sub-family F member 2 (Iron-inhibited ABC transporter 2)	reviewed	623	7	0.946
FXR1	Q9NUQ8	Q9NUQ8	ABCF3	ATP-binding cassette sub-family F member 3	reviewed	709	5	0.938
FXR1	Q8N2K0-2	Q8N2K0	ABHD12 C20orf22	Monoacylglycerol lipase ABHD12 (EC 3.1.1.23) (2-arachidonoylglycerol hydrolase) (Abhydrolase domain-containing protein 12)	reviewed	398	2	0.842
FXR1	Q8NFV4	Q8NFV4	ABHD11 WBSCR21 PP1226	Alpha/beta hydrolase domain-containing protein 11 (Abhydrolase domain-containing protein 11) (EC 3.-.-.-) (Williams-Beuren syndrome chromosomal region 21 protein)	reviewed	315	2	0.842
FXR1	Q96IU4	Q96IU4	ABHD14B CIB	Alpha/beta hydrolase domain-containing protein 14B (Abhydrolase domain-containing protein 14B) (EC 3.-.-.-) (CCG1-interacting factor B)	reviewed	210	6	0.972
FXR1	Q9H845	Q9H845	ACAD9	Acyl-CoA dehydrogenase family member 9, mitochondrial (ACAD-9) (EC 1.3.99.-)	reviewed	621	5	0.936
FXR1	P49748-3	P49748	ACADVL VLCAD	Very long-chain specific acyl-CoA dehydrogenase, mitochondrial (VLCAD) (EC 1.3.8.9)	reviewed	655	7	0.966
FXR1	P53396	P53396	ACLY	ATP-citrate synthase (EC 2.3.3.8) (ATP-citrate (pro-S-)-lyase) (ACL) (Citrate cleavage enzyme)	reviewed	1101	22	1
FXR1	Q99798	Q99798	ACO2	Aconitate hydratase, mitochondrial (Aconitase) (EC 4.2.1.3) (Citrate hydro-lyase)	reviewed	780	6	0.95
FXR1	Q15067-2	Q15067	ACOX1 ACOX	Peroxisomal acyl-coenzyme A oxidase 1 (AOX) (EC 1.3.3.6) (Palmitoyl-CoA oxidase) (Straight-chain acyl-CoA oxidase) (SCOX)	reviewed	660	2	0.878
FXR1	O95573	O95573	ACSL3 ACS3 FACL3 LACS3	Long-chain-fatty-acid--CoA ligase 3 (EC 6.2.1.3) (Long-chain acyl-CoA synthetase 3) (LACS 3)	reviewed	720	5	0.936
FXR1	O60488	O60488	ACSL4 ACS4 FACL4 LACS4	Long-chain-fatty-acid--CoA ligase 4 (EC 6.2.1.3) (Long-chain acyl-CoA synthetase 4) (LACS 4)	reviewed	711	5	0.938
FXR1	Q9ULC5-3	Q9ULC5	ACSL5 ACS5 FACL5 UNQ633/PRO1250	Long-chain-fatty-acid--CoA ligase 5 (EC 6.2.1.3) (Long-chain acyl-CoA synthetase 5) (LACS 5)	reviewed	683	3	0.89
FXR1	P12814	P12814	ACTN1	Alpha-actinin-1 (Alpha-actinin cytoskeletal isoform) (F-actin cross-linking protein) (Non-muscle alpha-actinin-1)	reviewed	892	67	1
FXR1	P61163	P61163	ACTR1A CTRN1	Alpha-centractin (Centractin) (ARP1) (Actin-RPV) (Centrosome-associated actin homolog)	reviewed	376	18	1
FXR1	Q9UEY8	Q9UEY8	ADD3 ADDL	Gamma-adducin (Adducin-like protein 70)	reviewed	706	2	0.818
FXR1	P55263-3	P55263	ADK	Adenosine kinase (AK) (EC 2.7.1.20) (Adenosine 5'-phosphotransferase)	reviewed	362	4	0.95
FXR1	Q9NRN7	Q9NRN7	AASDHPPT CGI-80 HAH-P HSPC223 x0005	L-aminoadipate-semialdehyde dehydrogenase-phosphopantetheinyl transferase (EC 2.7.8.-) (4'-phosphopantetheinyl transferase) (Alpha-aminoadipic semialdehyde dehydrogenase-phosphopantetheinyl transferase) (AASD-PPT) (LYS5 ortholog)	reviewed	309	9	0.768
FXR1	Q9HCK5	Q9HCK5	AGO4 EIF2C4 KIAA1567	Protein argonaute-4 (Argonaute4) (hAgo4) (Argonaute RISC catalytic component 4) (Eukaryotic translation initiation factor 2C 4) (eIF-2C 4) (eIF2C 4)	reviewed	861	3	0.884
FXR1	Q09666	Q09666	AHNAK PM227	Neuroblast differentiation-associated protein AHNAK (Desmoyokin)	reviewed	5890	286	0.91
FXR1	P35869	P35869	AHR BHLHE76	Aryl hydrocarbon receptor (Ah receptor) (AhR) (Class E basic helix-loop-helix protein 76) (bHLHe76)	reviewed	848	2	0.834
FXR1	O95433	O95433	AHSA1 C14orf3 HSPC322	Activator of 90 kDa heat shock protein ATPase homolog 1 (AHA1) (p38)	reviewed	338	10	0.97
FXR1	O95831	O95831	AIFM1 AIF PDCD8	Apoptosis-inducing factor 1, mitochondrial (EC 1.1.1.-) (Programmed cell death protein 8)	reviewed	613	8	0.974
FXR1	Q9BRQ8	Q9BRQ8	AIFM2 AMID PRG3	Apoptosis-inducing factor 2 (EC 1.-.-.-) (Apoptosis-inducing factor homologous mitochondrion-associated inducer of death) (Apoptosis-inducing factor-like mitochondrion-associated inducer of death) (p53-responsive gene 3 protein)	reviewed	373	3	0.844
FXR1	Q12904	Q12904	AIMP1 EMAP2 SCYE1	Aminoacyl tRNA synthase complex-interacting multifunctional protein 1 (Multisynthase complex auxiliary component p43) [Cleaved into: Endothelial monocyte-activating polypeptide 2 (EMAP-2) (Endothelial monocyte-activating polypeptide II) (EMAP-II) (Small i	reviewed	312	13	0.998
FXR1	Q13155	Q13155	AIMP2 JTV1 PRO0992	Aminoacyl tRNA synthase complex-interacting multifunctional protein 2 (Multisynthase complex auxiliary component p38) (Protein JTV-1)	reviewed	320	9	0.976
FXR1	P14550	P14550	AKR1A1 ALDR1 ALR	Alcohol dehydrogenase [NADP(+)] (EC 1.1.1.2) (Aldehyde reductase) (Aldo-keto reductase family 1 member A1)	reviewed	325	4	0.932
FXR1	P42330	P42330	AKR1C3 DDH1 HSD17B5 KIAA0119 PGFS	Aldo-keto reductase family 1 member C3 (EC 1.-.-.-) (17-beta-hydroxysteroid dehydrogenase type 5) (17-beta-HSD 5) (3-alpha-HSD type II, brain) (3-alpha-hydroxysteroid dehydrogenase type 2) (3-alpha-HSD type 2) (EC 1.1.1.357) (Chlordecone reductase homolog	reviewed	323	13	0.994
FXR1	Q12802-4	Q12802	AKAP13 BRX HT31 LBC	A-kinase anchor protein 13 (AKAP-13) (AKAP-Lbc) (Breast cancer nuclear receptor-binding auxiliary protein) (Guanine nucleotide exchange factor Lbc) (Human thyroid-anchoring protein 31) (Lymphoid blast crisis oncogene) (LBC oncogene) (Non-oncogenic Rho GTP	reviewed	2813	2	0.846
FXR1	P00352	P00352	ALDH1A1 ALDC ALDH1 PUMB1	Retinal dehydrogenase 1 (RALDH 1) (RalDH1) (EC 1.2.1.36) (ALDH-E1) (ALHDII) (Aldehyde dehydrogenase family 1 member A1) (Aldehyde dehydrogenase, cytosolic)	reviewed	501	19	0.924
FXR1	P51648	P51648	ALDH3A2 ALDH10 FALDH	Fatty aldehyde dehydrogenase (EC 1.2.1.3) (Aldehyde dehydrogenase 10) (Aldehyde dehydrogenase family 3 member A2) (Microsomal aldehyde dehydrogenase)	reviewed	485	16	0.984
FXR1	P49189	P49189	ALDH9A1 ALDH4 ALDH7 ALDH9	4-trimethylaminobutyraldehyde dehydrogenase (TMABADH) (EC 1.2.1.47) (Aldehyde dehydrogenase E3 isozyme) (Aldehyde dehydrogenase family 9 member A1) (EC 1.2.1.3) (Gamma-aminobutyraldehyde dehydrogenase) (EC 1.2.1.19) (R-aminobutyraldehyde dehydrogenase)	reviewed	494	3	0.924
FXR1	P05091	P05091	ALDH2 ALDM	Aldehyde dehydrogenase, mitochondrial (EC 1.2.1.3) (ALDH class 2) (ALDH-E2) (ALDHI)	reviewed	517	4	0.882
FXR1	P09972	P09972	ALDOC ALDC	Fructose-bisphosphate aldolase C (EC 4.1.2.13) (Brain-type aldolase)	reviewed	364	19	1
FXR1	P28838	P28838	LAP3 LAPEP PEPS	Cytosol aminopeptidase (EC 3.4.11.1) (Leucine aminopeptidase 3) (LAP-3) (Leucyl aminopeptidase) (Peptidase S) (Proline aminopeptidase) (EC 3.4.11.5) (Prolyl aminopeptidase)	reviewed	519	4	0.91
FXR1	P39687	P39687	ANP32A C15orf1 LANP MAPM PHAP1	Acidic leucine-rich nuclear phosphoprotein 32 family member A (Acidic nuclear phosphoprotein pp32) (Leucine-rich acidic nuclear protein) (LANP) (Mapmodulin) (Potent heat-stable protein phosphatase 2A inhibitor I1PP2A) (Putative HLA-DR-associated protein I	reviewed	249	4	0.932
FXR1	Q5TB20	Q9BTT0	ANP32E	Acidic leucine-rich nuclear phosphoprotein 32 family member E (LANP-like protein) (LANP-L)	reviewed	268	6	0.932
FXR1	Q9P2R3-2	Q9P2R3	ANKFY1 ANKHZN KIAA1255	Ankyrin repeat and FYVE domain-containing protein 1 (Ankyrin repeats hooked to a zinc finger motif)	reviewed	1169	2	0.87
FXR1	Q9NQW6	Q9NQW6	ANLN	Actin-binding protein anillin	reviewed	1124	4	0.922
FXR1	P01008	P01008	SERPINC1 AT3 PRO0309	Antithrombin-III (ATIII) (Serpin C1)	reviewed	464	2	0.856
FXR1	Q9UJ72	Q9UJ72	ANXA10 ANX14	Annexin A10 (Annexin-10) (Annexin-14)	reviewed	324	2	0.834
FXR1	P50995	P50995	ANXA11 ANX11	Annexin A11 (56 kDa autoantigen) (Annexin XI) (Annexin-11) (Calcyclin-associated annexin 50) (CAP-50)	reviewed	505	20	0.792
FXR1	P20073-2	P20073	ANXA7 ANX7 SNX OK/SW-cl.95	Annexin A7 (Annexin VII) (Annexin-7) (Synexin)	reviewed	488	2	0.878
FXR1	Q10567-3	Q10567	AP1B1 ADTB1 BAM22 CLAPB2	AP-1 complex subunit beta-1 (Adapter-related protein complex 1 subunit beta-1) (Adaptor protein complex AP-1 subunit beta-1) (Beta-1-adaptin) (Beta-adaptin 1) (Clathrin assembly protein complex 1 beta large chain) (Golgi adaptor HA1/AP1 adaptin beta subun	reviewed	949	11	0.984
FXR1	Q9Y6Q5	Q9Y6Q5	AP1M2	AP-1 complex subunit mu-2 (AP-mu chain family member mu1B) (Adaptor protein complex AP-1 subunit mu-2) (Adaptor-related protein complex 1 subunit mu-2) (Clathrin assembly protein complex 1 mu-2 medium chain 2) (Golgi adaptor HA1/AP1 adaptin mu-2 subunit)	reviewed	423	8	0.956
FXR1	O95782	O95782	AP2A1 ADTAA CLAPA1	AP-2 complex subunit alpha-1 (100 kDa coated vesicle protein A) (Adapter-related protein complex 2 subunit alpha-1) (Adaptor protein complex AP-2 subunit alpha-1) (Alpha-adaptin A) (Alpha1-adaptin) (Clathrin assembly protein complex 2 alpha-A large chain)	reviewed	977	17	0.986
FXR1	P63010	P63010	AP2B1 ADTB2 CLAPB1	AP-2 complex subunit beta (AP105B) (Adapter-related protein complex 2 subunit beta) (Adaptor protein complex AP-2 subunit beta) (Beta-2-adaptin) (Beta-adaptin) (Clathrin assembly protein complex 2 beta large chain) (Plasma membrane adaptor HA2/AP2 adaptin	reviewed	937	16	0.982
FXR1	O00203	O00203	AP3B1 ADTB3A	AP-3 complex subunit beta-1 (Adapter-related protein complex 3 subunit beta-1) (Adaptor protein complex AP-3 subunit beta-1) (Beta-3A-adaptin) (Clathrin assembly protein complex 3 beta-1 large chain)	reviewed	1094	4	0.942
FXR1	O14617-5	O14617	AP3D1 PRO0039	AP-3 complex subunit delta-1 (AP-3 complex subunit delta) (Adapter-related protein complex 3 subunit delta-1) (Delta-adaptin)	reviewed	1153	2	0.852
FXR1	Q92572	Q92572	AP3S1 CLAPS3	AP-3 complex subunit sigma-1 (AP-3 complex subunit sigma-3A) (Adapter-related protein complex 3 subunit sigma-1) (Clathrin-associated/assembly/adapter protein, small 3) (Sigma-3A-adaptin) (Sigma3A-adaptin) (Sigma-adaptin 3a)	reviewed	193	4	0.924
FXR1	P27695	P27695	APEX1 APE APE1 APEX APX HAP1 REF1	DNA-(apurinic or apyrimidinic site) lyase (EC 3.1.-.-) (EC 4.2.99.18) (APEX nuclease) (APEN) (Apurinic-apyrimidinic endonuclease 1) (AP endonuclease 1) (APE-1) (REF-1) (Redox factor-1) [Cleaved into: DNA-(apurinic or apyrimidinic site) lyase, mitochondria	reviewed	318	12	0.988
FXR1	Q9BZZ5-2	Q9BZZ5	API5 MIG8	Apoptosis inhibitor 5 (API-5) (Antiapoptosis clone 11 protein) (AAC-11) (Cell migration-inducing gene 8 protein) (Fibroblast growth factor 2-interacting factor) (FIF) (Protein XAGL)	reviewed	524	10	0.988
FXR1	Q9BQE5	Q9BQE5	APOL2	Apolipoprotein L2 (Apolipoprotein L-II) (ApoL-II)	reviewed	337	2	0.832
FXR1	P07741-2	P07741	APRT	Adenine phosphoribosyltransferase (APRT) (EC 2.4.2.7)	reviewed	180	4	0.912
FXR1	P61204	P61204	ARF3	ADP-ribosylation factor 3	reviewed	181	14	0.996
FXR1	P18085	P18085	ARF4 ARF2	ADP-ribosylation factor 4	reviewed	180	19	0.808
FXR1	P84085	P84085	ARF5	ADP-ribosylation factor 5	reviewed	180	15	0.724
FXR1	P62330	P62330	ARF6	ADP-ribosylation factor 6	reviewed	175	7	0.988
FXR1	Q8N6H7	Q8N6H7	ARFGAP2 ZNF289 Nbla10535	ADP-ribosylation factor GTPase-activating protein 2 (ARF GAP 2) (GTPase-activating protein ZNF289) (Zinc finger protein 289)	reviewed	521	5	0.928
FXR1	Q92888-3	Q92888	ARHGEF1	Rho guanine nucleotide exchange factor 1 (115 kDa guanine nucleotide exchange factor) (p115-RhoGEF) (p115RhoGEF) (Sub1.5)	reviewed	912	7	0.974
FXR1	Q5VV41-2	Q5VV41	ARHGEF16 EPHEXIN4 NBR	Rho guanine nucleotide exchange factor 16 (Ephexin-4)	reviewed	709	2	0.852
FXR1	O95154	O95154	AKR7A3 AFAR2	Aflatoxin B1 aldehyde reductase member 3 (EC 1.-.-.-) (AFB1 aldehyde reductase 2) (AFB1-AR 2)	reviewed	331	6	0.948
FXR1	Q86WX3	Q86WX3	RPS19BP1 AROS	Active regulator of SIRT1 (40S ribosomal protein S19-binding protein 1) (RPS19-binding protein 1) (S19BP)	reviewed	136	2	0.874
FXR1	P61158	P61158	ACTR3 ARP3	Actin-related protein 3 (Actin-like protein 3)	reviewed	418	20	0.926
FXR1	O15145	O15145	ARPC3 ARC21	Actin-related protein 2/3 complex subunit 3 (Arp2/3 complex 21 kDa subunit) (p21-ARC)	reviewed	178	7	0.992
FXR1	P59998-3	P59998	ARPC4 ARC20	Actin-related protein 2/3 complex subunit 4 (Arp2/3 complex 20 kDa subunit) (p20-ARC)	reviewed	168	9	0.98
FXR1	O15511	O15511	ARPC5 ARC16	Actin-related protein 2/3 complex subunit 5 (Arp2/3 complex 16 kDa subunit) (p16-ARC)	reviewed	151	2	0.886
FXR1	O43150	O43150	ASAP2 DDEF2 KIAA0400	Arf-GAP with SH3 domain, ANK repeat and PH domain-containing protein 2 (Development and differentiation-enhancing factor 2) (Paxillin-associated protein with ARF GAP activity 3) (PAG3) (Pyk2 C-terminus-associated protein) (PAP)	reviewed	1006	3	0.908
FXR1	Q9ULZ3-3	Q9ULZ3	PYCARD ASC CARD5 TMS1	Apoptosis-associated speck-like protein containing a CARD (hASC) (Caspase recruitment domain-containing protein 5) (PYD and CARD domain-containing protein) (Target of methylation-induced silencing 1)	reviewed	195	4	0.908
FXR1	P08243	P08243	ASNS TS11	Asparagine synthetase [glutamine-hydrolyzing] (EC 6.3.5.4) (Cell cycle control protein TS11) (Glutamine-dependent asparagine synthetase)	reviewed	561	17	0.992
FXR1	P00966	P00966	ASS1 ASS	Argininosuccinate synthase (EC 6.3.4.5) (Citrulline--aspartate ligase)	reviewed	412	10	0.974
FXR1	P05023	P05023	ATP1A1	Sodium/potassium-transporting ATPase subunit alpha-1 (Na(+)/K(+) ATPase alpha-1 subunit) (EC 3.6.3.9) (Sodium pump subunit alpha-1)	reviewed	1023	23	0.996
FXR1	P05026	P05026	ATP1B1 ATP1B	Sodium/potassium-transporting ATPase subunit beta-1 (Sodium/potassium-dependent ATPase subunit beta-1)	reviewed	303	3	0.898
FXR1	P24539	P24539	ATP5F1	ATP synthase F(0) complex subunit B1, mitochondrial (ATP synthase proton-transporting mitochondrial F(0) complex subunit B1) (ATP synthase subunit b) (ATPase subunit b)	reviewed	256	7	0.97
FXR1	O94817	O94817	ATG12 APG12 APG12L	Ubiquitin-like protein ATG12 (Autophagy-related protein 12) (APG12-like)	reviewed	140	2	0.888
FXR1	Q9NT62	Q9NT62	ATG3 APG3 APG3L	Ubiquitin-like-conjugating enzyme ATG3 (EC 6.3.2.-) (Autophagy-related protein 3) (APG3-like) (hApg3) (Protein PC3-96)	reviewed	314	3	0.872
FXR1	Q9UII2	Q9UII2	ATPIF1 ATPI	ATPase inhibitor, mitochondrial (Inhibitor of F(1)F(o)-ATPase) (IF(1)) (IF1)	reviewed	106	2	0.874
FXR1	Q6DD88	Q6DD88	ATL3	Atlastin-3 (EC 3.6.5.-)	reviewed	541	3	0.876
FXR1	P56385	P56385	ATP5I ATP5K	ATP synthase subunit e, mitochondrial (ATPase subunit e)	reviewed	69	2	0.9
FXR1	O75964	O75964	ATP5L	ATP synthase subunit g, mitochondrial (ATPase subunit g)	reviewed	103	2	0.894
FXR1	P30049	P30049	ATP5D	ATP synthase subunit delta, mitochondrial (F-ATPase delta subunit)	reviewed	168	2	0.872
FXR1	P36542	P36542	ATP5C1 ATP5C ATP5CL1	ATP synthase subunit gamma, mitochondrial (F-ATPase gamma subunit)	reviewed	298	7	0.97
FXR1	Q9UBB4	Q9UBB4	ATXN10 SCA10	Ataxin-10 (Brain protein E46 homolog) (Spinocerebellar ataxia type 10 protein)	reviewed	475	4	0.922
FXR1	Q8WWM7-2	Q8WWM7	ATXN2L A2D A2LG A2LP A2RP	Ataxin-2-like protein (Ataxin-2 domain protein) (Ataxin-2-related protein)	reviewed	1075	15	0.998
FXR1	Q9Y679-3	Q9Y679	AUP1	Ancient ubiquitous protein 1	reviewed	476	2	0.844
FXR1	Q9UPN4-2	Q9UPN4	AZI1 CEP131 KIAA1118	5-azacytidine-induced protein 1 (Centrosomal protein of 131 kDa) (Cep131) (Pre-acrosome localization protein 1)	reviewed	1083	2	0.836
FXR1	P61769	P61769	B2M CDABP0092 HDCMA22P	Beta-2-microglobulin [Cleaved into: Beta-2-microglobulin form pI 5.3]	reviewed	119	4	0.964
FXR1	O00154-4	O00154	ACOT7 BACH	Cytosolic acyl coenzyme A thioester hydrolase (EC 3.1.2.2) (Acyl-CoA thioesterase 7) (Brain acyl-CoA hydrolase) (BACH) (CTE-IIa) (CTE-II) (Long chain acyl-CoA thioester hydrolase)	reviewed	380	4	0.914
FXR1	O75531	O75531	BANF1 BAF BCRG1	Barrier-to-autointegration factor (Breakpoint cluster region protein 1) [Cleaved into: Barrier-to-autointegration factor, N-terminally processed]	reviewed	89	3	0.924
FXR1	Q9UQB8-5	Q9UQB8	BAIAP2	Brain-specific angiogenesis inhibitor 1-associated protein 2 (BAI-associated protein 2) (BAI1-associated protein 2) (Protein BAP2) (Fas ligand-associated factor 3) (FLAF3) (Insulin receptor substrate p53/p58) (IRS-58) (IRSp53/58) (Insulin receptor substra	reviewed	552	9	0.978
FXR1	P51572	P51572	BCAP31 BAP31 DXS1357E	B-cell receptor-associated protein 31 (BCR-associated protein 31) (Bap31) (6C6-AG tumor-associated antigen) (Protein CDM) (p28)	reviewed	246	5	0.93
FXR1	Q9NRL2	Q9NRL2	BAZ1A ACF1 WCRF180 HSPC317	Bromodomain adjacent to zinc finger domain protein 1A (ATP-dependent chromatin-remodeling protein) (ATP-utilizing chromatin assembly and remodeling factor 1) (hACF1) (CHRAC subunit ACF1) (Williams syndrome transcription factor-related chromatin-remodeling	reviewed	1556	5	0.974
FXR1	O95999	O95999	BCL10 CIPER CLAP	B-cell lymphoma/leukemia 10 (B-cell CLL/lymphoma 10) (Bcl-10) (CARD-containing molecule enhancing NF-kappa-B) (CARD-like apoptotic protein) (hCLAP) (CED-3/ICH-1 prodomain homologous E10-like regulator) (CIPER) (Cellular homolog of vCARMEN) (cCARMEN) (Cell	reviewed	233	2	0.874
FXR1	Q9NYF8-2	Q9NYF8	BCLAF1 BTF KIAA0164	Bcl-2-associated transcription factor 1 (Btf)	reviewed	920	3	0.898
FXR1	Q9UHR4	Q9UHR4	BAIAP2L1 IRTKS	Brain-specific angiogenesis inhibitor 1-associated protein 2-like protein 1 (BAI1-associated protein 2-like protein 1) (Insulin receptor tyrosine kinase substrate)	reviewed	511	4	0.934
FXR1	P53004	P53004	BLVRA BLVR BVR	Biliverdin reductase A (BVR A) (EC 1.3.1.24) (Biliverdin-IX alpha-reductase)	reviewed	296	4	0.93
FXR1	P51451	P51451	BLK	Tyrosine-protein kinase Blk (EC 2.7.10.2) (B lymphocyte kinase) (p55-Blk)	reviewed	505	3	0.902
FXR1	P30043	P30043	BLVRB FLR	Flavin reductase (NADPH) (FR) (EC 1.5.1.30) (Biliverdin reductase B) (BVR-B) (EC 1.3.1.24) (Biliverdin-IX beta-reductase) (Green heme-binding protein) (GHBP) (NADPH-dependent diaphorase) (NADPH-flavin reductase) (FLR)	reviewed	206	8	0.982
FXR1	Q14692	Q14692	BMS1 BMS1L KIAA0187	Ribosome biogenesis protein BMS1 homolog (Ribosome assembly protein BMS1 homolog)	reviewed	1282	3	0.906
FXR1	Q9H3K6	Q9H3K6	BOLA2 BOLA2A My016; BOLA2B	BolA-like protein 2	reviewed	86	2	0.878
FXR1	Q6PJG6	Q6PJG6	BRAT1 BAAT1 C7orf27	BRCA1-associated ATM activator 1 (BRCA1-associated protein required for ATM activation protein 1)	reviewed	821	2	0.8
FXR1	Q8TDN6	Q8TDN6	BRIX1 BRIX BXDC2	Ribosome biogenesis protein BRX1 homolog (Brix domain-containing protein 2)	reviewed	353	6	0.952
FXR1	O43684-2	O43684	BUB3	Mitotic checkpoint protein BUB3	reviewed	328	13	0.994
FXR1	P41223	P41223	BUD31 EDG2	Protein BUD31 homolog (Protein EDG-2) (Protein G10 homolog)	reviewed	144	2	0.872
FXR1	Q13895	Q13895	BYSL	Bystin	reviewed	437	3	0.88
FXR1	Q7L1Q6-4	Q7L1Q6	BZW1 BZAP45 KIAA0005	Basic leucine zipper and W2 domain-containing protein 1 (Protein Orf)	reviewed	419	10	0.984
FXR1	Q9Y6E2	Q9Y6E2	BZW2 HSPC028 MSTP017	Basic leucine zipper and W2 domain-containing protein 2	reviewed	419	13	0.984
FXR1	Q07021	Q07021	C1QBP GC1QBP HABP1 SF2P32	Complement component 1 Q subcomponent-binding protein, mitochondrial (ASF/SF2-associated protein p32) (Glycoprotein gC1qBP) (C1qBP) (Hyaluronan-binding protein 1) (Mitochondrial matrix protein p32) (gC1q-R protein) (p33)	reviewed	282	10	0.84
FXR1	Q6UB35	Q6UB35	MTHFD1L FTHFSDC1	Monofunctional C1-tetrahydrofolate synthase, mitochondrial (EC 6.3.4.3) (Formyltetrahydrofolate synthetase)	reviewed	978	4	0.95
FXR1	Q9NWV4	Q9NWV4	C1orf123	UPF0587 protein C1orf123	reviewed	160	2	0.866
FXR1	Q9Y376	Q9Y376	CAB39 MO25 CGI-66	Calcium-binding protein 39 (MO25alpha) (Protein Mo25)	reviewed	341	4	0.914
FXR1	P00918	P00918	CA2	Carbonic anhydrase 2 (EC 4.2.1.1) (Carbonate dehydratase II) (Carbonic anhydrase C) (CAC) (Carbonic anhydrase II) (CA-II)	reviewed	260	10	0.99
FXR1	P22676	P22676	CALB2 CAB29	Calretinin (CR) (29 kDa calbindin)	reviewed	271	5	0.932
FXR1	P27797	P27797	CALR CRTC	Calreticulin (CRP55) (Calregulin) (Endoplasmic reticulum resident protein 60) (ERp60) (HACBP) (grp60)	reviewed	417	3	0.878
FXR1	P17655	P17655	CAPN2 CANPL2	Calpain-2 catalytic subunit (EC 3.4.22.53) (Calcium-activated neutral proteinase 2) (CANP 2) (Calpain M-type) (Calpain large polypeptide L2) (Calpain-2 large subunit) (Millimolar-calpain) (M-calpain)	reviewed	700	2	0.84
FXR1	Q86VP6	Q86VP6	CAND1 KIAA0829 TIP120 TIP120A	Cullin-associated NEDD8-dissociated protein 1 (Cullin-associated and neddylation-dissociated protein 1) (TBP-interacting protein of 120 kDa A) (TBP-interacting protein 120A) (p120 CAND1)	reviewed	1230	16	0.998
FXR1	Q14444	Q14444	CAPRIN1 GPIAP1 GPIP137 M11S1 RNG105	Caprin-1 (Cell cycle-associated protein 1) (Cytoplasmic activation- and proliferation-associated protein 1) (GPI-anchored membrane protein 1) (GPI-anchored protein p137) (GPI-p137) (p137GPI) (Membrane component chromosome 11 surface marker 1) (RNA granule	reviewed	709	6	0.946
FXR1	Q86X55	Q86X55	CARM1 PRMT4	Histone-arginine methyltransferase CARM1 (EC 2.1.1.-) (EC 2.1.1.125) (Coactivator-associated arginine methyltransferase 1) (Protein arginine N-methyltransferase 4)	reviewed	608	2	0.856
FXR1	P04040	P04040	CAT	Catalase (EC 1.11.1.6)	reviewed	527	5	0.956
FXR1	P45973	P45973	CBX5 HP1A	Chromobox protein homolog 5 (Antigen p25) (Heterochromatin protein 1 homolog alpha) (HP1 alpha)	reviewed	191	4	0.926
FXR1	Q96FZ2	Q96FZ2	C3orf37 DC12	UPF0361 protein C3orf37	reviewed	354	2	0.858
FXR1	Q8N163	Q8N163	CCAR2 DBC1 KIAA1967	Cell cycle and apoptosis regulator protein 2 (Cell division cycle and apoptosis regulator protein 2) (DBIRD complex subunit KIAA1967) (Deleted in breast cancer gene 1 protein) (DBC-1) (DBC.1) (p30 DBC)	reviewed	923	18	0.986
FXR1	Q86WR0	Q86WR0	CCDC25	Coiled-coil domain-containing protein 25	reviewed	208	2	0.818
FXR1	Q96A33	Q96A33	CCDC47 GK001 MSTP041 PSEC0077	Coiled-coil domain-containing protein 47	reviewed	483	2	0.86
FXR1	Q9Y5K6	Q9Y5K6	CD2AP	CD2-associated protein (Adapter protein CMS) (Cas ligand with multiple SH3 domains)	reviewed	639	14	0.98
FXR1	Q16543	Q16543	CDC37 CDC37A	Hsp90 co-chaperone Cdc37 (Hsp90 chaperone protein kinase-targeting subunit) (p50Cdc37) [Cleaved into: Hsp90 co-chaperone Cdc37, N-terminally processed]	reviewed	378	4	0.898
FXR1	P60953	P60953	CDC42	Cell division control protein 42 homolog (G25K GTP-binding protein)	reviewed	191	7	0.986
FXR1	Q6P1J9	Q6P1J9	CDC73 C1orf28 HRPT2	Parafibromin (Cell division cycle protein 73 homolog) (Hyperparathyroidism 2 protein)	reviewed	531	2	0.828
FXR1	Q9UKY7	Q9UKY7	CDV3 H41	Protein CDV3 homolog	reviewed	258	2	0.868
FXR1	Q03701	Q03701	CEBPZ CBF2	CCAAT/enhancer-binding protein zeta (CCAAT-box-binding transcription factor) (CBF) (CCAAT-binding factor)	reviewed	1054	5	0.972
FXR1	Q92879-2	Q92879	CELF1 BRUNOL2 CUGBP CUGBP1 NAB50	CUGBP Elav-like family member 1 (CELF-1) (50 kDa nuclear polyadenylated RNA-binding protein) (Bruno-like protein 2) (CUG triplet repeat RNA-binding protein 1) (CUG-BP1) (CUG-BP- and ETR-3-like factor 1) (Deadenylation factor CUG-BP) (Embryo deadenylation	reviewed	486	2	0.834
FXR1	Q7Z7K6	Q7Z7K6	CENPV PRR6	Centromere protein V (CENP-V) (Nuclear protein p30) (Proline-rich protein 6)	reviewed	275	3	0.874
FXR1	Q9BRJ6	Q9BRJ6	C7orf50 FP15621	Uncharacterized protein C7orf50	reviewed	194	3	0.916
FXR1	Q16880	Q16880	UGT8 CGT UGT4	2-hydroxyacylsphingosine 1-beta-galactosyltransferase (EC 2.4.1.45) (Ceramide UDP-galactosyltransferase) (Cerebroside synthase) (UDP-galactose-ceramide galactosyltransferase)	reviewed	541	2	0.864
FXR1	Q9H7E9	Q9H7E9	C8orf33	UPF0488 protein C8orf33	reviewed	229	2	0.846
FXR1	Q9NX63	Q9NX63	CHCHD3 MINOS3	Coiled-coil-helix-coiled-coil-helix domain-containing protein 3, mitochondrial	reviewed	227	5	0.944
FXR1	Q14839-2	Q14839	CHD4	Chromodomain-helicase-DNA-binding protein 4 (CHD-4) (EC 3.6.4.12) (ATP-dependent helicase CHD4) (Mi-2 autoantigen 218 kDa protein) (Mi2-beta)	reviewed	1912	6	0.964
FXR1	Q8IWX8	Q8IWX8	CHERP DAN26 SCAF6	Calcium homeostasis endoplasmic reticulum protein (ERPROT 213-21) (SR-related CTD-associated factor 6)	reviewed	916	3	0.872
FXR1	Q9UQN3	Q9UQN3	CHMP2B CGI-84	Charged multivesicular body protein 2b (CHMP2.5) (Chromatin-modifying protein 2b) (CHMP2b) (Vacuolar protein sorting-associated protein 2-2) (Vps2-2) (hVps2-2)	reviewed	213	2	0.878
FXR1	Q9H444	Q9H444	CHMP4B C20orf178 SHAX1	Charged multivesicular body protein 4b (Chromatin-modifying protein 4b) (CHMP4b) (SNF7 homolog associated with Alix 1) (SNF7-2) (hSnf7-2) (Vacuolar protein sorting-associated protein 32-2) (Vps32-2) (hVps32-2)	reviewed	224	4	0.91
FXR1	Q9NZZ3	Q9NZZ3	CHMP5 C9orf83 SNF7DC2 CGI-34 HSPC177 PNAS-114 PNAS-2	Charged multivesicular body protein 5 (Chromatin-modifying protein 5) (SNF7 domain-containing protein 2) (Vacuolar protein sorting-associated protein 60) (Vps60) (hVps60)	reviewed	219	2	0.856
FXR1	Q9UHD1	Q9UHD1	CHORDC1 CHP1	Cysteine and histidine-rich domain-containing protein 1 (CHORD domain-containing protein 1) (CHORD-containing protein 1) (CHP-1) (Protein morgana)	reviewed	332	10	0.982
FXR1	Q9P2M7	Q9P2M7	CGN KIAA1319	Cingulin	reviewed	1197	13	0.986
FXR1	Q969X6-2	Q969X6	CIRH1A KIAA1988 UTP4	Cirhin	reviewed	686	4	0.91
FXR1	O75390	O75390	CS	Citrate synthase, mitochondrial (EC 2.3.3.1)	reviewed	466	7	0.94
FXR1	Q07065	Q07065	CKAP4	Cytoskeleton-associated protein 4 (63-kDa cytoskeleton-linking membrane protein) (Climp-63) (p63)	reviewed	602	2	0.854
FXR1	Q14008-3	Q14008	CKAP5 KIAA0097	Cytoskeleton-associated protein 5 (Colonic and hepatic tumor overexpressed gene protein) (Ch-TOG)	reviewed	2032	16	1
FXR1	P56856	P56856	CLDN18 UNQ778/PRO1572	Claudin-18	reviewed	261	2	0.842
FXR1	Q9UDT6	Q9UDT6	CLIP2 CYLN2 KIAA0291 WBSCR3 WBSCR4 WSCR4	CAP-Gly domain-containing linker protein 2 (Cytoplasmic linker protein 115) (CLIP-115) (Cytoplasmic linker protein 2) (Williams-Beuren syndrome chromosomal region 3 protein) (Williams-Beuren syndrome chromosomal region 4 protein)	reviewed	1046	3	0.898
FXR1	Q9UJS0-2	Q9UJS0	SLC25A13 ARALAR2	Calcium-binding mitochondrial carrier protein Aralar2 (Citrin) (Mitochondrial aspartate glutamate carrier 2) (Solute carrier family 25 member 13)	reviewed	675	7	0.93
FXR1	Q9Y224	Q9Y224	C14orf166 CGI-99	UPF0568 protein C14orf166 (CLE7 homolog) (CLE)	reviewed	244	12	0.998
FXR1	P62633	P62633	CNBP RNF163 ZNF9	Cellular nucleic acid-binding protein (CNBP) (Zinc finger protein 9)	reviewed	177	3	0.896
FXR1	Q15021	Q15021	NCAPD2 CAPD2 CNAP1 KIAA0159	Condensin complex subunit 1 (Chromosome condensation-related SMC-associated protein 1) (Chromosome-associated protein D2) (hCAP-D2) (Non-SMC condensin I complex subunit D2) (XCAP-D2 homolog)	reviewed	1401	8	0.986
FXR1	Q9BPX3	Q9BPX3	NCAPG CAPG NYMEL3	Condensin complex subunit 3 (Chromosome-associated protein G) (Condensin subunit CAP-G) (hCAP-G) (Melanoma antigen NY-MEL-3) (Non-SMC condensin I complex subunit G) (XCAP-G homolog)	reviewed	1015	4	0.928
FXR1	Q96KP4	Q96KP4	CNDP2 CN2 CPGL PEPA	Cytosolic non-specific dipeptidase (EC 3.4.13.18) (CNDP dipeptidase 2) (Glutamate carboxypeptidase-like protein 1) (Peptidase A)	reviewed	475	10	0.982
FXR1	Q9H9A5-3	Q9H9A5	CNOT10	CCR4-NOT transcription complex subunit 10	reviewed	744	2	0.836
FXR1	A5YKK6	A5YKK6	CNOT1 CDC39 KIAA1007 NOT1 AD-005	CCR4-NOT transcription complex subunit 1 (CCR4-associated factor 1) (Negative regulator of transcription subunit 1 homolog) (NOT1H) (hNOT1)	reviewed	2376	6	0.942
FXR1	Q9UIV1-2	Q9UIV1	CNOT7 CAF1	CCR4-NOT transcription complex subunit 7 (EC 3.1.13.4) (BTG1-binding factor 1) (CCR4-associated factor 1) (CAF-1) (Caf1a)	reviewed	285	2	0.862
FXR1	P01024	P01024	C3 CPAMD1	Complement C3 (C3 and PZP-like alpha-2-macroglobulin domain-containing protein 1) [Cleaved into: Complement C3 beta chain; Complement C3 alpha chain; C3a anaphylatoxin; Acylation stimulating protein (ASP) (C3adesArg); Complement C3b alpha' chain; Compleme	reviewed	1663	6	0.962
FXR1	Q13057	Q13057	COASY PSEC0106	Bifunctional coenzyme A synthase (CoA synthase) (NBP) (POV-2) [Includes: Phosphopantetheine adenylyltransferase (EC 2.7.7.3) (Dephospho-CoA pyrophosphorylase) (Pantetheine-phosphate adenylyltransferase) (PPAT); Dephospho-CoA kinase (DPCK) (EC 2.7.1.24) (D	reviewed	564	7	0.922
FXR1	Q8WTW3	Q8WTW3	COG1 KIAA1381 LDLB	Conserved oligomeric Golgi complex subunit 1 (COG complex subunit 1) (Component of oligomeric Golgi complex 1)	reviewed	980	2	0.794
FXR1	P38432	P38432	COIL CLN80	Coilin (p80)	reviewed	576	2	0.854
FXR1	P21964	P21964	COMT	Catechol O-methyltransferase (EC 2.1.1.6)	reviewed	271	2	0.846
FXR1	P53621	P53621	COPA	Coatomer subunit alpha (Alpha-coat protein) (Alpha-COP) (HEP-COP) (HEPCOP) [Cleaved into: Xenin (Xenopsin-related peptide); Proxenin]	reviewed	1224	65	0.964
FXR1	P53618	P53618	COPB1 COPB MSTP026	Coatomer subunit beta (Beta-coat protein) (Beta-COP)	reviewed	953	35	0.924
FXR1	P48444-2	P48444	ARCN1 COPD	Coatomer subunit delta (Archain) (Delta-coat protein) (Delta-COP)	reviewed	511	2	0.84
FXR1	O14579	O14579	COPE	Coatomer subunit epsilon (Epsilon-coat protein) (Epsilon-COP)	reviewed	308	12	0.996
FXR1	Q9Y678	Q9Y678	COPG1 COPG	Coatomer subunit gamma-1 (Gamma-1-coat protein) (Gamma-1-COP)	reviewed	874	51	0.956
FXR1	Q9UBF2	Q9UBF2	COPG2	Coatomer subunit gamma-2 (Gamma-2-coat protein) (Gamma-2-COP)	reviewed	871	5	0.954
FXR1	A7MAP1	Q9ULV4	CORO1C CRN2 CRNN4	Coronin-1C (Coronin-3) (hCRNN4)	reviewed	474	11	0.984
FXR1	Q14019	Q14019	COTL1 CLP	Coactosin-like protein	reviewed	142	9	0.994
FXR1	P00403	P00403	MT-CO2 COII COXII MTCO2	Cytochrome c oxidase subunit 2 (Cytochrome c oxidase polypeptide II)	reviewed	227	3	0.886
FXR1	P20674	P20674	COX5A	Cytochrome c oxidase subunit 5A, mitochondrial (Cytochrome c oxidase polypeptide Va)	reviewed	150	4	0.95
FXR1	Q96SQ9	Q96SQ9	CYP2S1 UNQ891/PRO1906	Cytochrome P450 2S1 (EC 1.14.14.1) (CYPIIS1)	reviewed	504	7	0.946
FXR1	O75131	O75131	CPNE3 CPN3 KIAA0636	Copine-3 (Copine III)	reviewed	537	20	0.866
FXR1	P04632	P04632	CAPNS1 CAPN4 CAPNS	Calpain small subunit 1 (CSS1) (Calcium-activated neutral proteinase small subunit) (CANP small subunit) (Calcium-dependent protease small subunit) (CDPS) (Calcium-dependent protease small subunit 1) (Calpain regulatory subunit)	reviewed	268	8	0.992
FXR1	Q9UKF6	Q9UKF6	CPSF3 CPSF73	Cleavage and polyadenylation specificity factor subunit 3 (EC 3.1.27.-) (Cleavage and polyadenylation specificity factor 73 kDa subunit) (CPSF 73 kDa subunit) (mRNA 3'-end-processing endonuclease CPSF-73)	reviewed	684	2	0.868
FXR1	O43809	O43809	NUDT21 CFIM25 CPSF25 CPSF5	Cleavage and polyadenylation specificity factor subunit 5 (Cleavage and polyadenylation specificity factor 25 kDa subunit) (CFIm25) (CPSF 25 kDa subunit) (Nucleoside diphosphate-linked moiety X motif 21) (Nudix motif 21) (Pre-mRNA cleavage factor Im 25 kD	reviewed	227	14	0.996
FXR1	Q16630-2	Q16630	CPSF6 CFIM68	Cleavage and polyadenylation specificity factor subunit 6 (Cleavage and polyadenylation specificity factor 68 kDa subunit) (CFIm68) (CPSF 68 kDa subunit) (Pre-mRNA cleavage factor Im 68 kDa subunit) (Protein HPBRII-4/7)	reviewed	551	8	0.98
FXR1	Q8N684-2	Q8N684	CPSF7	Cleavage and polyadenylation specificity factor subunit 7 (Cleavage and polyadenylation specificity factor 59 kDa subunit) (CFIm59) (CPSF 59 kDa subunit) (Pre-mRNA cleavage factor Im 59 kDa subunit)	reviewed	471	9	0.992
FXR1	O75534-2	O75534	CSDE1 D1S155E KIAA0885 NRU UNR	Cold shock domain-containing protein E1 (N-ras upstream gene protein) (Protein UNR)	reviewed	798	10	0.986
FXR1	P68400	P68400	CSNK2A1 CK2A1	Casein kinase II subunit alpha (CK II alpha) (EC 2.7.11.1)	reviewed	391	8	0.962
FXR1	P19784	P19784	CSNK2A2 CK2A2	Casein kinase II subunit alpha' (CK II alpha') (EC 2.7.11.1)	reviewed	350	2	0.836
FXR1	P41240	P41240	CSK	Tyrosine-protein kinase CSK (EC 2.7.10.2) (C-Src kinase) (Protein-tyrosine kinase CYL)	reviewed	450	5	0.944
FXR1	Q13098-5	Q13098	GPS1 COPS1 CSN1	COP9 signalosome complex subunit 1 (SGN1) (Signalosome subunit 1) (G protein pathway suppressor 1) (GPS-1) (JAB1-containing signalosome subunit 1) (Protein MFH)	reviewed	491	2	0.846
FXR1	Q9UNS2	Q9UNS2	COPS3 CSN3	COP9 signalosome complex subunit 3 (SGN3) (Signalosome subunit 3) (JAB1-containing signalosome subunit 3)	reviewed	423	4	0.92
FXR1	Q9BT78-2	Q9BT78	COPS4 CSN4	COP9 signalosome complex subunit 4 (SGN4) (Signalosome subunit 4) (JAB1-containing signalosome subunit 4)	reviewed	406	2	0.824
FXR1	Q92905	Q92905	COPS5 CSN5 JAB1	COP9 signalosome complex subunit 5 (SGN5) (Signalosome subunit 5) (EC 3.4.-.-) (Jun activation domain-binding protein 1)	reviewed	334	2	0.858
FXR1	Q7L5N1	Q7L5N1	COPS6 CSN6 HVIP	COP9 signalosome complex subunit 6 (SGN6) (Signalosome subunit 6) (JAB1-containing signalosome subunit 6) (MOV34 homolog) (Vpr-interacting protein) (hVIP)	reviewed	327	4	0.936
FXR1	P21291	P21291	CSRP1 CSRP CYRP	Cysteine and glycine-rich protein 1 (Cysteine-rich protein 1) (CRP) (CRP1)	reviewed	193	6	0.978
FXR1	Q12996	Q12996	CSTF3	Cleavage stimulation factor subunit 3 (CF-1 77 kDa subunit) (Cleavage stimulation factor 77 kDa subunit) (CSTF 77 kDa subunit) (CstF-77)	reviewed	717	3	0.9
FXR1	Q8WYA6-2	Q8WYA6	CTNNBL1 C20orf33 PP8304	Beta-catenin-like protein 1 (Nuclear-associated protein) (NAP) (Testis development protein NYD-SP19)	reviewed	563	2	0.862
FXR1	P35221	P35221	CTNNA1	Catenin alpha-1 (Alpha E-catenin) (Cadherin-associated protein) (Renal carcinoma antigen NY-REN-13)	reviewed	906	19	0.992
FXR1	P35222	P35222	CTNNB1 CTNNB OK/SW-cl.35 PRO2286	Catenin beta-1 (Beta-catenin)	reviewed	781	31	0.858
FXR1	Q13616	Q13616	CUL1	Cullin-1 (CUL-1)	reviewed	776	6	0.96
FXR1	Q13619	Q13619	CUL4A	Cullin-4A (CUL-4A)	reviewed	759	7	0.962
FXR1	Q13620-1	Q13620	CUL4B KIAA0695	Cullin-4B (CUL-4B)	reviewed	913	8	0.966
FXR1	Q9P013	Q9P013	CWC15 C11orf5 AD-002 HSPC148	Spliceosome-associated protein CWC15 homolog	reviewed	229	3	0.894
FXR1	Q5R370	Q9HB71	CACYBP S100A6BP SIP PNAS-107	Calcyclin-binding protein (CacyBP) (hCacyBP) (S100A6-binding protein) (Siah-interacting protein)	reviewed	228	9	0.704
FXR1	Q7L576	Q7L576	CYFIP1 KIAA0068	Cytoplasmic FMR1-interacting protein 1 (Specifically Rac1-associated protein 1) (Sra-1) (p140sra-1)	reviewed	1253	18	0.75
FXR1	P04080	P04080	CSTB CST6 STFB	Cystatin-B (CPI-B) (Liver thiol proteinase inhibitor) (Stefin-B)	reviewed	98	3	0.942
FXR1	Q96EP5-2	Q96EP5	DAZAP1	DAZ-associated protein 1 (Deleted in azoospermia-associated protein 1)	reviewed	407	7	0.956
FXR1	Q9UJU6	Q9UJU6	DBNL CMAP SH3P7 PP5423	Drebrin-like protein (Cervical SH3P7) (Cervical mucin-associated protein) (Drebrin-F) (HPK1-interacting protein of 55 kDa) (HIP-55) (SH3 domain-containing protein 7)	reviewed	430	11	0.984
FXR1	O43237	O43237	DYNC1LI2 DNCLI2 LIC2	Cytoplasmic dynein 1 light intermediate chain 2 (Dynein light intermediate chain 2, cytosolic) (LIC-2) (LIC53/55)	reviewed	492	5	0.946
FXR1	P61962	P61962	DCAF7 HAN11 WDR68	DDB1- and CUL4-associated factor 7 (WD repeat-containing protein 68) (WD repeat-containing protein An11 homolog)	reviewed	342	2	0.83
FXR1	Q96GG9	Q96GG9	DCUN1D1 DCUN1L1 RP42 SCCRO	DCN1-like protein 1 (DCUN1 domain-containing protein 1) (Defective in cullin neddylation protein 1-like protein 1) (Squamous cell carcinoma-related oncogene)	reviewed	259	3	0.864
FXR1	Q96C86	Q96C86	DCPS DCS1 HINT5 HSPC015	m7GpppX diphosphatase (EC 3.6.1.59) (DCS-1) (Decapping scavenger enzyme) (Hint-related 7meGMP-directed hydrolase) (Histidine triad nucleotide-binding protein 5) (Histidine triad protein member 5) (HINT-5) (Scavenger mRNA-decapping enzyme DcpS)	reviewed	337	2	0.852
FXR1	A8MY36	Q14203	DCTN1	Dynactin subunit 1 (150 kDa dynein-associated polypeptide) (DAP-150) (DP-150) (p135) (p150-glued)	reviewed	1278	3	0.912
FXR1	Q16531	Q16531	DDB1 XAP1	DNA damage-binding protein 1 (DDB p127 subunit) (DNA damage-binding protein a) (DDBa) (Damage-specific DNA-binding protein 1) (HBV X-associated protein 1) (XAP-1) (UV-damaged DNA-binding factor) (UV-damaged DNA-binding protein 1) (UV-DDB 1) (XPE-binding f	reviewed	1140	7	0.978
FXR1	Q13206	Q13206	DDX10	Probable ATP-dependent RNA helicase DDX10 (EC 3.6.4.13) (DEAD box protein 10)	reviewed	875	2	0.864
FXR1	Q92841-1	Q92841	DDX17	Probable ATP-dependent RNA helicase DDX17 (EC 3.6.4.13) (DEAD box protein 17) (DEAD box protein p72) (RNA-dependent helicase p72)	reviewed	729	42	1
FXR1	Q92499	Q92499	DDX1	ATP-dependent RNA helicase DDX1 (EC 3.6.4.13) (DEAD box protein 1) (DEAD box protein retinoblastoma) (DBP-RB)	reviewed	740	21	0.998
FXR1	Q9BUQ8	Q9BUQ8	DDX23	Probable ATP-dependent RNA helicase DDX23 (EC 3.6.4.13) (100 kDa U5 snRNP-specific protein) (DEAD box protein 23) (PRP28 homolog) (U5-100kD)	reviewed	820	2	0.834
FXR1	Q9GZR7	Q9GZR7	DDX24	ATP-dependent RNA helicase DDX24 (EC 3.6.4.13) (DEAD box protein 24)	reviewed	859	4	0.924
FXR1	Q9UJV9	Q9UJV9	DDX41 ABS	Probable ATP-dependent RNA helicase DDX41 (EC 3.6.4.13) (DEAD box protein 41) (DEAD box protein abstrakt homolog)	reviewed	622	2	0.828
FXR1	Q86XP3	Q86XP3	DDX42	ATP-dependent RNA helicase DDX42 (EC 3.6.4.13) (DEAD box protein 42) (RNA helicase-like protein) (RHELP) (RNA helicase-related protein) (RNAHP) (SF3b DEAD box protein) (Splicing factor 3B-associated 125 kDa protein) (SF3b125)	reviewed	938	6	0.962
FXR1	Q7L014	Q7L014	DDX46 KIAA0801	Probable ATP-dependent RNA helicase DDX46 (EC 3.6.4.13) (DEAD box protein 46) (PRP5 homolog)	reviewed	1031	4	0.942
FXR1	Q9BQ39	Q9BQ39	DDX50	ATP-dependent RNA helicase DDX50 (EC 3.6.4.13) (DEAD box protein 50) (Gu-beta) (Nucleolar protein Gu2)	reviewed	737	2	0.812
FXR1	Q8TDD1	Q8TDD1	DDX54	ATP-dependent RNA helicase DDX54 (EC 3.6.4.13) (ATP-dependent RNA helicase DP97) (DEAD box RNA helicase 97 kDa) (DEAD box protein 54)	reviewed	881	2	0.832
FXR1	Q9NY93	Q9NY93	DDX56 DDX21 NOH61	Probable ATP-dependent RNA helicase DDX56 (EC 3.6.4.13) (ATP-dependent 61 kDa nucleolar RNA helicase) (DEAD box protein 21) (DEAD box protein 56)	reviewed	547	5	0.95
FXR1	P26196	P26196	DDX6 HLR2 RCK	Probable ATP-dependent RNA helicase DDX6 (EC 3.6.4.13) (ATP-dependent RNA helicase p54) (DEAD box protein 6) (Oncogene RCK)	reviewed	483	26	0.78
FXR1	Q16698	Q16698	DECR1 DECR	2,4-dienoyl-CoA reductase, mitochondrial (EC 1.3.1.34) (2,4-dienoyl-CoA reductase [NADPH]) (4-enoyl-CoA reductase [NADPH])	reviewed	335	5	0.934
FXR1	P35659-2	P35659	DEK	Protein DEK	reviewed	375	4	0.92
FXR1	Q9Y315	Q9Y315	DERA CGI-26	Putative deoxyribose-phosphate aldolase (DERA) (EC 4.1.2.4) (2-deoxy-D-ribose 5-phosphate aldolase) (Phosphodeoxyriboaldolase) (Deoxyriboaldolase)	reviewed	318	3	0.902
FXR1	P60981	P60981	DSTN ACTDP DSN	Destrin (Actin-depolymerizing factor) (ADF)	reviewed	165	9	0.836
FXR1	Q3LXA3	Q3LXA3	DAK	Bifunctional ATP-dependent dihydroxyacetone kinase/FAD-AMP lyase (cyclizing) [Includes: ATP-dependent dihydroxyacetone kinase (DHA kinase) (EC 2.7.1.28) (EC 2.7.1.29) (Glycerone kinase) (Triokinase) (Triose kinase); FAD-AMP lyase (cyclizing) (EC 4.6.1.15)	reviewed	575	2	0.856
FXR1	Q8NBQ5	Q8NBQ5	HSD17B11 DHRS8 PAN1B PSEC0029 UNQ207/PRO233	Estradiol 17-beta-dehydrogenase 11 (EC 1.1.1.62) (17-beta-hydroxysteroid dehydrogenase 11) (17-beta-HSD 11) (17bHSD11) (17betaHSD11) (17-beta-hydroxysteroid dehydrogenase XI) (17-beta-HSD XI) (17betaHSDXI) (Cutaneous T-cell lymphoma-associated antigen HD-	reviewed	300	4	0.9
FXR1	Q53GQ0	Q53GQ0	HSD17B12	Estradiol 17-beta-dehydrogenase 12 (EC 1.1.1.62) (17-beta-hydroxysteroid dehydrogenase 12) (17-beta-HSD 12) (3-ketoacyl-CoA reductase) (KAR) (EC 1.3.1.-)	reviewed	312	5	0.936
FXR1	P37059	P37059	HSD17B2 EDH17B2	Estradiol 17-beta-dehydrogenase 2 (EC 1.1.1.62) (17-beta-hydroxysteroid dehydrogenase type 2) (17-beta-HSD 2) (20 alpha-hydroxysteroid dehydrogenase) (20-alpha-HSD) (E2DH) (Microsomal 17-beta-hydroxysteroid dehydrogenase) (Testosterone 17-beta-dehydrogena	reviewed	387	4	0.92
FXR1	P51659	P51659	HSD17B4 EDH17B4	Peroxisomal multifunctional enzyme type 2 (MFE-2) (17-beta-hydroxysteroid dehydrogenase 4) (17-beta-HSD 4) (D-bifunctional protein) (DBP) (Multifunctional protein 2) (MPF-2) [Cleaved into: (3R)-hydroxyacyl-CoA dehydrogenase (EC 1.1.1.n12); Enoyl-CoA hydra	reviewed	736	16	0.982
FXR1	Q15392	Q15392	DHCR24 KIAA0018	Delta(24)-sterol reductase (EC 1.3.1.72) (24-dehydrocholesterol reductase) (3-beta-hydroxysterol delta-24-reductase) (Diminuto/dwarf1 homolog) (Seladin-1)	reviewed	516	3	0.882
FXR1	Q9UBM7	Q9UBM7	DHCR7 D7SR	7-dehydrocholesterol reductase (7-DHC reductase) (EC 1.3.1.21) (Putative sterol reductase SR-2) (Sterol Delta(7)-reductase)	reviewed	475	5	0.934
FXR1	P31040	P31040	SDHA SDH2 SDHF	Succinate dehydrogenase [ubiquinone] flavoprotein subunit, mitochondrial (EC 1.3.5.1) (Flavoprotein subunit of complex II) (Fp)	reviewed	664	2	0.844
FXR1	Q00796	Q00796	SORD	Sorbitol dehydrogenase (EC 1.1.1.14) (L-iditol 2-dehydrogenase)	reviewed	357	13	0.76
FXR1	O60231	O60231	DHX16 DBP2 DDX16 KIAA0577	Putative pre-mRNA-splicing factor ATP-dependent RNA helicase DHX16 (EC 3.6.4.13) (ATP-dependent RNA helicase #3) (DEAH-box protein 16)	reviewed	1041	6	0.934
FXR1	Q7L2E3-3	Q7L2E3	DHX30 DDX30 KIAA0890	Putative ATP-dependent RNA helicase DHX30 (EC 3.6.4.13) (DEAH box protein 30)	reviewed	1194	4	0.918
FXR1	Q9H2U1-2	Q9H2U1	DHX36 DDX36 KIAA1488 MLEL1 RHAU	Probable ATP-dependent RNA helicase DHX36 (EC 3.6.4.13) (DEAH box protein 36) (MLE-like protein 1) (RNA helicase associated with AU-rich element ARE)	reviewed	1008	6	0.936
FXR1	O60832	O60832	DKC1 NOLA4	H/ACA ribonucleoprotein complex subunit 4 (EC 5.4.99.-) (CBF5 homolog) (Dyskerin) (Nopp140-associated protein of 57 kDa) (Nucleolar protein NAP57) (Nucleolar protein family A member 4) (snoRNP protein DKC1)	reviewed	514	13	0.728
FXR1	P09622	P09622	DLD GCSL LAD PHE3	Dihydrolipoyl dehydrogenase, mitochondrial (EC 1.8.1.4) (Dihydrolipoamide dehydrogenase) (Glycine cleavage system L protein)	reviewed	509	10	0.98
FXR1	Q13217	Q13217	DNAJC3 P58IPK PRKRI	DnaJ homolog subfamily C member 3 (Endoplasmic reticulum DNA J domain-containing protein 6) (ER-resident protein ERdj6) (ERdj6) (Interferon-induced, double-stranded RNA-activated protein kinase inhibitor) (Protein kinase inhibitor of 58 kDa) (Protein kina	reviewed	504	2	0.85
FXR1	Q8WXX5	Q8WXX5	DNAJC9	DnaJ homolog subfamily C member 9 (DnaJ protein SB73)	reviewed	260	4	0.932
FXR1	P26358-2	P26358	DNMT1 AIM CXXC9 DNMT	DNA (cytosine-5)-methyltransferase 1 (Dnmt1) (EC 2.1.1.37) (CXXC-type zinc finger protein 9) (DNA methyltransferase HsaI) (DNA MTase HsaI) (M.HsaI) (MCMT)	reviewed	1616	5	0.944
FXR1	Q96N67-3	Q96N67	DOCK7 KIAA1771	Dedicator of cytokinesis protein 7	reviewed	2140	2	0.842
FXR1	P28340	P28340	POLD1 POLD	DNA polymerase delta catalytic subunit (EC 2.7.7.7) (DNA polymerase subunit delta p125)	reviewed	1107	6	0.976
FXR1	Q9NRF9	Q9NRF9	POLE3 CHRAC17	DNA polymerase epsilon subunit 3 (EC 2.7.7.7) (Arsenic-transactivated protein) (AsTP) (Chromatin accessibility complex 17 kDa protein) (CHRAC-17) (HuCHRAC17) (DNA polymerase II subunit 3) (DNA polymerase epsilon subunit p17)	reviewed	147	2	0.88
FXR1	P55039	P55039	DRG2	Developmentally-regulated GTP-binding protein 2 (DRG-2)	reviewed	364	5	0.936
FXR1	Q14126	Q14126	DSG2 CDHF5	Desmoglein-2 (Cadherin family member 5) (HDGC)	reviewed	1118	15	0.984
FXR1	Q8TDB6	Q8TDB6	DTX3L BBAP	E3 ubiquitin-protein ligase DTX3L (EC 6.3.2.-) (B-lymphoma- and BAL-associated protein) (Protein deltex-3-like) (Rhysin-2) (Rhysin2)	reviewed	740	4	0.934
FXR1	Q9BVJ7	Q9BVJ7	DUSP23 LDP3 VHZ	Dual specificity protein phosphatase 23 (EC 3.1.3.16) (EC 3.1.3.48) (Low molecular mass dual specificity phosphatase 3) (LDP-3) (VH1-like phosphatase Z)	reviewed	150	3	0.94
FXR1	P51452	P51452	DUSP3 VHR	Dual specificity protein phosphatase 3 (EC 3.1.3.16) (EC 3.1.3.48) (Dual specificity protein phosphatase VHR) (Vaccinia H1-related phosphatase) (VHR)	reviewed	185	4	0.952
FXR1	Q13838-2	Q13838	DDX39B BAT1 UAP56	Spliceosome RNA helicase DDX39B (EC 3.6.4.13) (56 kDa U2AF65-associated protein) (ATP-dependent RNA helicase p47) (DEAD box protein UAP56) (HLA-B-associated transcript 1 protein)	reviewed	428	25	0.998
FXR1	Q14204	Q14204	DYNC1H1 DHC1 DNCH1 DNCL DNECL DYHC KIAA0325	Cytoplasmic dynein 1 heavy chain 1 (Cytoplasmic dynein heavy chain 1) (Dynein heavy chain, cytosolic)	reviewed	4646	47	0.848
FXR1	P63167	P63167	DYNLL1 DLC1 DNCL1 DNCLC1 HDLC1	Dynein light chain 1, cytoplasmic (8 kDa dynein light chain) (DLC8) (Dynein light chain LC8-type 1) (Protein inhibitor of neuronal nitric oxide synthase) (PIN)	reviewed	89	5	0.972
FXR1	P50570	P50570	DNM2 DYN2	Dynamin-2 (EC 3.6.5.5)	reviewed	870	17	0.984
FXR1	P19525	P19525	EIF2AK2 PKR PRKR	Interferon-induced, double-stranded RNA-activated protein kinase (EC 2.7.11.1) (Eukaryotic translation initiation factor 2-alpha kinase 2) (eIF-2A protein kinase 2) (Interferon-inducible RNA-dependent protein kinase) (P1/eIF-2A protein kinase) (Protein ki	reviewed	551	6	0.93
FXR1	Q9H4G0-2	Q9H4G0	EPB41L1 KIAA0338	Band 4.1-like protein 1 (Neuronal protein 4.1) (4.1N)	reviewed	881	12	0.992
FXR1	Q99848	Q99848	EBNA1BP2 EBP2	Probable rRNA-processing protein EBP2 (EBNA1-binding protein 2) (Nucleolar protein p40)	reviewed	306	4	0.916
FXR1	Q13011	Q13011	ECH1	Delta(3,5)-Delta(2,4)-dienoyl-CoA isomerase, mitochondrial (EC 5.3.3.-)	reviewed	328	5	0.918
FXR1	P55084	P55084	HADHB MSTP029	Trifunctional enzyme subunit beta, mitochondrial (TP-beta) [Includes: 3-ketoacyl-CoA thiolase (EC 2.3.1.16) (Acetyl-CoA acyltransferase) (Beta-ketothiolase)]	reviewed	474	14	0.988
FXR1	P30084	P30084	ECHS1	Enoyl-CoA hydratase, mitochondrial (EC 4.2.1.17) (Enoyl-CoA hydratase 1) (Short-chain enoyl-CoA hydratase) (SCEH)	reviewed	290	5	0.92
FXR1	Q9H8V3-2	Q9H8V3	ECT2	Protein ECT2 (Epithelial cell-transforming sequence 2 oncogene)	reviewed	914	2	0.904
FXR1	P29692-2	P29692	EEF1D EF1D	Elongation factor 1-delta (EF-1-delta) (Antigen NY-CO-4)	reviewed	281	17	0.994
FXR1	Q96RP9	Q96RP9	GFM1 EFG EFG1 GFM	Elongation factor G, mitochondrial (EF-Gmt) (Elongation factor G 1, mitochondrial) (mEF-G 1) (Elongation factor G1) (hEFG1)	reviewed	751	5	0.944
FXR1	Q96C19	Q96C19	EFHD2 SWS1	EF-hand domain-containing protein D2 (Swiprosin-1)	reviewed	240	11	0.994
FXR1	P43897	P43897	TSFM	Elongation factor Ts, mitochondrial (EF-Ts) (EF-TsMt)	reviewed	325	2	0.866
FXR1	P49411	P49411	TUFM	Elongation factor Tu, mitochondrial (EF-Tu) (P43)	reviewed	452	28	0.862
FXR1	Q9H4M9	Q9H4M9	EHD1 PAST PAST1 CDABP0131	EH domain-containing protein 1 (PAST homolog 1) (hPAST1) (Testilin)	reviewed	534	21	0.998
FXR1	Q9NZN4	Q9NZN4	EHD2 PAST2	EH domain-containing protein 2 (PAST homolog 2)	reviewed	543	4	0.922
FXR1	Q14232	Q14232	EIF2B1 EIF2BA	Translation initiation factor eIF-2B subunit alpha (eIF-2B GDP-GTP exchange factor subunit alpha)	reviewed	305	3	0.916
FXR1	P49770	P49770	EIF2B2 EIF2BB	Translation initiation factor eIF-2B subunit beta (S20I15) (S20III15) (eIF-2B GDP-GTP exchange factor subunit beta)	reviewed	351	3	0.876
FXR1	Q9UI10-2	Q9UI10	EIF2B4 EIF2BD	Translation initiation factor eIF-2B subunit delta (eIF-2B GDP-GTP exchange factor subunit delta)	reviewed	523	3	0.896
FXR1	Q13144	Q13144	EIF2B5 EIF2BE	Translation initiation factor eIF-2B subunit epsilon (eIF-2B GDP-GTP exchange factor subunit epsilon)	reviewed	721	3	0.876
FXR1	P41567	P41567	EIF1 SUI1	Eukaryotic translation initiation factor 1 (eIF1) (A121) (Protein translation factor SUI1 homolog) (Sui1iso1)	reviewed	113	2	0.88
FXR1	Q9BY44	Q9BY44	EIF2A CDA02 MSTP004 MSTP089	Eukaryotic translation initiation factor 2A (eIF-2A) (65 kDa eukaryotic translation initiation factor 2A) [Cleaved into: Eukaryotic translation initiation factor 2A, N-terminally processed]	reviewed	585	16	0.988
FXR1	Q14152	Q14152	EIF3A EIF3S10 KIAA0139	Eukaryotic translation initiation factor 3 subunit A (eIF3a) (Eukaryotic translation initiation factor 3 subunit 10) (eIF-3-theta) (eIF3 p167) (eIF3 p180) (eIF3 p185)	reviewed	1382	37	0.818
FXR1	O15371	O15371	EIF3D EIF3S7	Eukaryotic translation initiation factor 3 subunit D (eIF3d) (Eukaryotic translation initiation factor 3 subunit 7) (eIF-3-zeta) (eIF3 p66)	reviewed	548	9	0.972
FXR1	O00303	O00303	EIF3F EIF3S5	Eukaryotic translation initiation factor 3 subunit F (eIF3f) (Deubiquitinating enzyme eIF3f) (EC 3.4.19.12) (Eukaryotic translation initiation factor 3 subunit 5) (eIF-3-epsilon) (eIF3 p47)	reviewed	357	12	0.986
FXR1	O75821	O75821	EIF3G EIF3S4	Eukaryotic translation initiation factor 3 subunit G (eIF3g) (Eukaryotic translation initiation factor 3 RNA-binding subunit) (eIF-3 RNA-binding subunit) (Eukaryotic translation initiation factor 3 subunit 4) (eIF-3-delta) (eIF3 p42) (eIF3 p44)	reviewed	320	7	0.96
FXR1	O75822	O75822	EIF3J EIF3S1 PRO0391	Eukaryotic translation initiation factor 3 subunit J (eIF3j) (Eukaryotic translation initiation factor 3 subunit 1) (eIF-3-alpha) (eIF3 p35)	reviewed	258	3	0.89
FXR1	Q7L2H7	Q7L2H7	EIF3M HFLB5 PCID1 GA17 PNAS-125	Eukaryotic translation initiation factor 3 subunit M (eIF3m) (Fetal lung protein B5) (hFL-B5) (PCI domain-containing protein 1)	reviewed	374	5	0.922
FXR1	B5ME19	B5ME19	EIF3CL	Eukaryotic translation initiation factor 3 subunit C-like protein	reviewed	914	16	0.738
FXR1	Q15717	Q15717	ELAVL1 HUR	ELAV-like protein 1 (Hu-antigen R) (HuR)	reviewed	326	9	0.966
FXR1	Q15370-2	Q15370	TCEB2	Transcription elongation factor B polypeptide 2 (Elongin 18 kDa subunit) (Elongin-B) (EloB) (RNA polymerase II transcription factor SIII subunit B) (SIII p18)	reviewed	118	3	0.9
FXR1	Q15369	Q15369	TCEB1	Transcription elongation factor B polypeptide 1 (Elongin 15 kDa subunit) (Elongin-C) (EloC) (RNA polymerase II transcription factor SIII subunit C) (SIII p15)	reviewed	112	5	0.992
FXR1	Q8N766-3	Q8N766	EMC1 KIAA0090 PSEC0263	ER membrane protein complex subunit 1	reviewed	993	3	0.886
FXR1	Q15006	Q15006	EMC2 KIAA0103 TTC35	ER membrane protein complex subunit 2 (Tetratricopeptide repeat protein 35) (TPR repeat protein 35)	reviewed	297	2	0.852
FXR1	Q9P0I2	Q9P0I2	EMC3 TMEM111	ER membrane protein complex subunit 3 (Transmembrane protein 111)	reviewed	261	2	0.844
FXR1	P29317	P29317	EPHA2 ECK	Ephrin type-A receptor 2 (EC 2.7.10.1) (Epithelial cell kinase) (Tyrosine-protein kinase receptor ECK)	reviewed	976	19	0.804
FXR1	P58107	P58107	EPPK1 EPIPL	Epiplakin (450 kDa epidermal antigen)	reviewed	5090	351	0.74
FXR1	Q12929	Q12929	EPS8	Epidermal growth factor receptor kinase substrate 8	reviewed	822	8	0.958
FXR1	Q2NKX8	Q2NKX8	ERCC6L PICH	DNA excision repair protein ERCC-6-like (EC 3.6.4.12) (ATP-dependent helicase ERCC6-like) (PLK1-interacting checkpoint helicase) (Tumor antigen BJ-HCC-15)	reviewed	1250	2	0.744
FXR1	P33947	P33947	KDELR2 ERD2.2	ER lumen protein retaining receptor 2 (ERD2-like protein 1) (ELP-1) (KDEL endoplasmic reticulum protein retention receptor 2) (KDEL receptor 2)	reviewed	212	4	0.94
FXR1	J3KQG6	P15170	GSPT1 ERF3A	Eukaryotic peptide chain release factor GTP-binding subunit ERF3A (Eukaryotic peptide chain release factor subunit 3a) (eRF3a) (G1 to S phase transition protein 1 homolog)	reviewed	499	5	0.926
FXR1	O75477	O75477	ERLIN1 C10orf69 KE04 KEO4 SPFH1	Erlin-1 (Endoplasmic reticulum lipid raft-associated protein 1) (Protein KE04) (Stomatin-prohibitin-flotillin-HflC/K domain-containing protein 1) (SPFH domain-containing protein 1)	reviewed	346	6	0.938
FXR1	P30040	P30040	ERP29 C12orf8 ERP28	Endoplasmic reticulum resident protein 29 (ERp29) (Endoplasmic reticulum resident protein 28) (ERp28) (Endoplasmic reticulum resident protein 31) (ERp31)	reviewed	261	2	0.86
FXR1	Q8TE68	Q8TE68	EPS8L1 DRC3 EPS8R1 PP10566	Epidermal growth factor receptor kinase substrate 8-like protein 1 (EPS8-like protein 1) (Epidermal growth factor receptor pathway substrate 8-related protein 1) (EPS8-related protein 1)	reviewed	723	9	0.966
FXR1	Q9H6S3	Q9H6S3	EPS8L2 EPS8R2 PP13181	Epidermal growth factor receptor kinase substrate 8-like protein 2 (EPS8-like protein 2) (Epidermal growth factor receptor pathway substrate 8-related protein 2) (EPS8-related protein 2)	reviewed	715	2	0.876
FXR1	Q6NXG1-3	Q6NXG1	ESRP1 RBM35A	Epithelial splicing regulatory protein 1 (RNA-binding motif protein 35A) (RNA-binding protein 35A)	reviewed	681	12	0.998
FXR1	Q9H6T0	Q9H6T0	ESRP2 RBM35B PP7059	Epithelial splicing regulatory protein 2 (RNA-binding motif protein 35B) (RNA-binding protein 35B)	reviewed	727	4	0.924
FXR1	P10768	P10768	ESD	S-formylglutathione hydrolase (FGH) (EC 3.1.2.12) (Esterase D) (Methylumbelliferyl-acetate deacetylase) (EC 3.1.1.56)	reviewed	282	7	0.958
FXR1	Q9BSJ8	Q9BSJ8	ESYT1 FAM62A KIAA0747 MBC2	Extended synaptotagmin-1 (E-Syt1) (Membrane-bound C2 domain-containing protein)	reviewed	1104	4	0.944
FXR1	A0FGR8-6	A0FGR8	ESYT2 FAM62B KIAA1228	Extended synaptotagmin-2 (E-Syt2) (Chr2Syt)	reviewed	921	5	0.928
FXR1	P13804	P13804	ETFA	Electron transfer flavoprotein subunit alpha, mitochondrial (Alpha-ETF)	reviewed	333	18	0.996
FXR1	P38117	P38117	ETFB FP585	Electron transfer flavoprotein subunit beta (Beta-ETF)	reviewed	255	6	0.958
FXR1	O95571	O95571	ETHE1 HSCO	Persulfide dioxygenase ETHE1, mitochondrial (EC 1.13.11.18) (Ethylmalonic encephalopathy protein 1) (Hepatoma subtracted clone one protein) (Sulfur dioxygenase ETHE1)	reviewed	254	5	0.944
FXR1	Q96KP1	Q96KP1	EXOC2 SEC5 SEC5L1	Exocyst complex component 2 (Exocyst complex component Sec5)	reviewed	924	2	0.822
FXR1	Q9NQT4	Q9NQT4	EXOSC5 CML28 RRP46	Exosome complex component RRP46 (Chronic myelogenous leukemia tumor antigen 28) (Exosome component 5) (Ribosomal RNA-processing protein 46) (p12B)	reviewed	235	2	0.828
FXR1	Q5RKV6	Q5RKV6	EXOSC6 MTR3	Exosome complex component MTR3 (Exosome component 6) (mRNA transport regulator 3 homolog) (hMtr3) (p11)	reviewed	272	2	0.858
FXR1	Q96B26	Q96B26	EXOSC8 OIP2 RRP43	Exosome complex component RRP43 (Exosome component 8) (Opa-interacting protein 2) (OIP-2) (Ribosomal RNA-processing protein 43) (p9)	reviewed	276	2	0.836
FXR1	Q01780-2	Q01780	EXOSC10 PMSCL PMSCL2 RRP6	Exosome component 10 (EC 3.1.13.-) (Autoantigen PM/Scl 2) (P100 polymyositis-scleroderma overlap syndrome-associated autoantigen) (Polymyositis/scleroderma autoantigen 100 kDa) (PM/Scl-100) (Polymyositis/scleroderma autoantigen 2)	reviewed	885	3	0.892
FXR1	Q9NZB2	Q9NZB2	FAM120A C9orf10 KIAA0183 OSSA	Constitutive coactivator of PPAR-gamma-like protein 1 (Oxidative stress-associated Src activator) (Protein FAM120A)	reviewed	1118	13	0.986
FXR1	O60825-2	O60825	PFKFB2	6-phosphofructo-2-kinase/fructose-2,6-bisphosphatase 2 (6PF-2-K/Fru-2,6-P2ase 2) (PFK/FBPase 2) (6PF-2-K/Fru-2,6-P2ase heart-type isozyme) [Includes: 6-phosphofructo-2-kinase (EC 2.7.1.105); Fructose-2,6-bisphosphatase (EC 3.1.3.46)]	reviewed	505	3	0.848
FXR1	Q658Y4	Q658Y4	FAM91A1	Protein FAM91A1	reviewed	838	3	0.882
FXR1	Q9NUQ9	Q9NUQ9	FAM49B BM-009	Protein FAM49B (L1)	reviewed	324	4	0.9
FXR1	Q14320	Q14320	FAM50A DXS9928E HXC26 XAP5	Protein FAM50A (Protein HXC-26) (Protein XAP-5)	reviewed	339	6	0.934
FXR1	Q8NCA5	Q8NCA5	FAM98A	Protein FAM98A	reviewed	519	3	0.878
FXR1	Q13158	Q13158	FADD MORT1 GIG3	Protein FADD (FAS-associated death domain protein) (FAS-associating death domain-containing protein) (Growth-inhibiting gene 3 protein) (Mediator of receptor induced toxicity)	reviewed	208	3	0.904
FXR1	Q6P587-3	Q6P587	FAHD1 C16orf36 YISKL	Acylpyruvase FAHD1, mitochondrial (EC 3.7.1.5) (Fumarylacetoacetate hydrolase domain-containing protein 1) (YisK-like protein)	reviewed	224	2	0.87
FXR1	Q9NVI1-1	Q9NVI1	FANCI KIAA1794	Fanconi anemia group I protein (Protein FACI)	reviewed	1328	3	0.876
FXR1	Q9HCM7	Q9HCM7	FBRSL1 AUTS2L KIAA1545 XTP9	Fibrosin-1-like protein (AUTS2-like protein) (HBV X-transactivated gene 9 protein) (HBV XAg-transactivated protein 9)	reviewed	1045	2	0.796
FXR1	P21802-11	P21802	FGFR2 BEK KGFR KSAM	Fibroblast growth factor receptor 2 (FGFR-2) (EC 2.7.10.1) (K-sam) (KGFR) (Keratinocyte growth factor receptor) (CD antigen CD332)	reviewed	821	20	1
FXR1	Q14192	Q14192	FHL2 DRAL SLIM3	Four and a half LIM domains protein 2 (FHL-2) (LIM domain protein DRAL) (Skeletal muscle LIM-protein 3) (SLIM-3)	reviewed	279	3	0.882
FXR1	P02675	P02675	FGB	Fibrinogen beta chain [Cleaved into: Fibrinopeptide B; Fibrinogen beta chain]	reviewed	491	9	0.952
FXR1	Q13045	Q13045	FLII FLIL	Protein flightless-1 homolog	reviewed	1269	11	0.988
FXR1	O75955	O75955	FLOT1	Flotillin-1	reviewed	427	5	0.95
FXR1	Q06787-6	Q06787	FMR1	Fragile X mental retardation protein 1 (FMRP) (Protein FMR-1)	reviewed	632	32	1
FXR1	P14324	P14324	FDPS FPS KIAA1293	Farnesyl pyrophosphate synthase (FPP synthase) (FPS) (EC 2.5.1.10) ((2E,6E)-farnesyl diphosphate synthase) (Dimethylallyltranstransferase) (EC 2.5.1.1) (Farnesyl diphosphate synthase) (Geranyltranstransferase)	reviewed	419	2	0.842
FXR1	P35637-2	P35637	FUS TLS	RNA-binding protein FUS (75 kDa DNA-pairing protein) (Oncogene FUS) (Oncogene TLS) (POMp75) (Translocated in liposarcoma protein)	reviewed	526	9	0.96
FXR1	P51114-2	P51114	FXR1	Fragile X mental retardation syndrome-related protein 1 (hFXR1p)	reviewed	621	11	0.992
FXR1	Q13283	Q13283	G3BP1 G3BP	Ras GTPase-activating protein-binding protein 1 (G3BP-1) (EC 3.6.4.12) (EC 3.6.4.13) (ATP-dependent DNA helicase VIII) (hDH VIII) (GAP SH3 domain-binding protein 1)	reviewed	466	13	0.82
FXR1	P04406	P04406	GAPDH GAPD CDABP0047 OK/SW-cl.12	Glyceraldehyde-3-phosphate dehydrogenase (GAPDH) (EC 1.2.1.12) (Peptidyl-cysteine S-nitrosylase GAPDH) (EC 2.6.99.-)	reviewed	335	84	1
FXR1	P11413-3	P11413	G6PD	Glucose-6-phosphate 1-dehydrogenase (G6PD) (EC 1.1.1.49)	reviewed	515	19	0.956
FXR1	P06744	P06744	GPI	Glucose-6-phosphate isomerase (GPI) (EC 5.3.1.9) (Autocrine motility factor) (AMF) (Neuroleukin) (NLK) (Phosphoglucose isomerase) (PGI) (Phosphohexose isomerase) (PHI) (Sperm antigen 36) (SA-36)	reviewed	558	29	0.82
FXR1	P50440	P50440	GATM AGAT	Glycine amidinotransferase, mitochondrial (EC 2.1.4.1) (L-arginine:glycine amidinotransferase) (Transamidinase)	reviewed	423	2	0.822
FXR1	P62873	P62873	GNB1	Guanine nucleotide-binding protein G(I)/G(S)/G(T) subunit beta-1 (Transducin beta chain 1)	reviewed	340	9	0.984
FXR1	P62879	P62879	GNB2	Guanine nucleotide-binding protein G(I)/G(S)/G(T) subunit beta-2 (G protein subunit beta-2) (Transducin beta chain 2)	reviewed	340	12	0.994
FXR1	Q9HAV0	Q9HAV0	GNB4	Guanine nucleotide-binding protein subunit beta-4 (Transducin beta chain 4)	reviewed	340	3	0.872
FXR1	Q92616	Q92616	GCN1L1 KIAA0219	Translational activator GCN1 (HsGCN1) (GCN1-like protein 1)	reviewed	2671	49	1
FXR1	Q9BSJ2-4	Q9BSJ2	TUBGCP2 GCP2	Gamma-tubulin complex component 2 (GCP-2) (hGCP2) (Gamma-ring complex protein 103 kDa) (h103p) (hGrip103) (Spindle pole body protein Spc97 homolog) (hSpc97)	reviewed	902	4	0.906
FXR1	Q96CW5	Q96CW5	TUBGCP3 GCP3	Gamma-tubulin complex component 3 (GCP-3) (hGCP3) (Gamma-ring complex protein 104 kDa) (h104p) (hGrip104) (Spindle pole body protein Spc98 homolog) (hSpc98)	reviewed	907	2	0.868
FXR1	P50395-2	P50395	GDI2 RABGDIB	Rab GDP dissociation inhibitor beta (Rab GDI beta) (Guanosine diphosphate dissociation inhibitor 2) (GDI-2)	reviewed	445	4	0.918
FXR1	P57678	P57678	GEMIN4	Gem-associated protein 4 (Gemin-4) (Component of gems 4) (p97)	reviewed	1058	2	0.792
FXR1	Q8TEQ6	Q8TEQ6	GEMIN5	Gem-associated protein 5 (Gemin5)	reviewed	1508	3	0.838
FXR1	Q7L5D6	Q7L5D6	GET4 C7orf20 CEE TRC35 CGI-20	Golgi to ER traffic protein 4 homolog (Conserved edge-expressed protein) (Transmembrane domain recognition complex 35 kDa subunit) (TRC35)	reviewed	327	2	0.832
FXR1	Q9Y2X7-3	Q9Y2X7	GIT1	ARF GTPase-activating protein GIT1 (ARF GAP GIT1) (Cool-associated and tyrosine-phosphorylated protein 1) (CAT-1) (CAT1) (G protein-coupled receptor kinase-interactor 1) (GRK-interacting protein 1)	reviewed	761	6	0.942
FXR1	Q9HC38-2	Q9HC38	GLOD4 C17orf25 CGI-150 My027	Glyoxalase domain-containing protein 4	reviewed	313	4	0.914
FXR1	O76003	O76003	GLRX3 PICOT TXNL2 HUSSY-22	Glutaredoxin-3 (PKC-interacting cousin of thioredoxin) (PICOT) (PKC-theta-interacting protein) (PKCq-interacting protein) (Thioredoxin-like protein 2)	reviewed	335	2	0.822
FXR1	P34896-2	P34896	SHMT1	Serine hydroxymethyltransferase, cytosolic (SHMT) (EC 2.1.2.1) (Glycine hydroxymethyltransferase) (Serine methylase)	reviewed	483	2	0.852
FXR1	P34897	P34897	SHMT2	Serine hydroxymethyltransferase, mitochondrial (SHMT) (EC 2.1.2.1) (Glycine hydroxymethyltransferase) (Serine methylase)	reviewed	504	8	0.948
FXR1	P29992	P29992	GNA11 GA11	Guanine nucleotide-binding protein subunit alpha-11 (G alpha-11) (G-protein subunit alpha-11) (Guanine nucleotide-binding protein G(y) subunit alpha)	reviewed	359	3	0.88
FXR1	Q14344	Q14344	GNA13	Guanine nucleotide-binding protein subunit alpha-13 (G alpha-13) (G-protein subunit alpha-13)	reviewed	377	5	0.92
FXR1	P04899	P04899	GNAI2 GNAI2B	Guanine nucleotide-binding protein G(i) subunit alpha-2 (Adenylate cyclase-inhibiting G alpha protein)	reviewed	355	9	0.984
FXR1	P08754	P08754	GNAI3	Guanine nucleotide-binding protein G(k) subunit alpha (G(i) alpha-3)	reviewed	354	10	0.98
FXR1	Q5JWF2	Q5JWF2	GNAS GNAS1	Guanine nucleotide-binding protein G(s) subunit alpha isoforms XLas (Adenylate cyclase-stimulating G alpha protein) (Extra large alphas protein) (XLalphas)	reviewed	1037	6	0.95
FXR1	Q9BVP2	Q9BVP2	GNL3 E2IG3 NS	Guanine nucleotide-binding protein-like 3 (E2-induced gene 3 protein) (Novel nucleolar protein 47) (NNP47) (Nucleolar GTP-binding protein 3) (Nucleostemin)	reviewed	549	12	0.972
FXR1	Q92917	Q92917	GPKOW GPATC5 GPATCH5 T54	G patch domain and KOW motifs-containing protein (G patch domain-containing protein 5) (Protein MOS2 homolog) (Protein T54)	reviewed	476	2	0.848
FXR1	P18283	P18283	GPX2	Glutathione peroxidase 2 (GPx-2) (GSHPx-2) (EC 1.11.1.9) (Gastrointestinal glutathione peroxidase) (Glutathione peroxidase-gastrointestinal) (GPx-GI) (GSHPx-GI) (Glutathione peroxidase-related protein 2) (GPRP-2)	reviewed	190	4	0.94
FXR1	P22352	P22352	GPX3 GPXP	Glutathione peroxidase 3 (GPx-3) (GSHPx-3) (EC 1.11.1.9) (Extracellular glutathione peroxidase) (Plasma glutathione peroxidase) (GPx-P) (GSHPx-P)	reviewed	226	2	0.838
FXR1	P62993	P62993	GRB2 ASH	Growth factor receptor-bound protein 2 (Adapter protein GRB2) (Protein Ash) (SH2/SH3 adapter GRB2)	reviewed	217	7	0.982
FXR1	Q9HAV7	Q9HAV7	GRPEL1 GREPEL1	GrpE protein homolog 1, mitochondrial (HMGE) (Mt-GrpE#1)	reviewed	217	2	0.83
FXR1	Q9BQ67	Q9BQ67	GRWD1 GRWD KIAA1942 WDR28	Glutamate-rich WD repeat-containing protein 1	reviewed	446	6	0.938
FXR1	P00390-3	P00390	GSR GLUR GRD1	Glutathione reductase, mitochondrial (GR) (GRase) (EC 1.8.1.7)	reviewed	522	9	0.984
FXR1	Q03013	Q03013	GSTM4	Glutathione S-transferase Mu 4 (EC 2.5.1.18) (GST class-mu 4) (GST-Mu2) (GSTM4-4)	reviewed	218	4	0.928
FXR1	P78347-3	P78347	GTF2I BAP135 WBSCR6	General transcription factor II-I (GTFII-I) (TFII-I) (Bruton tyrosine kinase-associated protein 135) (BAP-135) (BTK-associated protein 135) (SRF-Phox1-interacting protein) (SPIN) (Williams-Beuren syndrome chromosomal region 6 protein)	reviewed	998	15	0.992
FXR1	O75367	O75367	H2AFY MACROH2A1	Core histone macro-H2A.1 (Histone macroH2A1) (mH2A1) (Histone H2A.y) (H2A/y) (Medulloblastoma antigen MU-MB-50.205)	reviewed	372	11	0.978
FXR1	Q58FF6	Q58FF6	HSP90AB4P	Putative heat shock protein HSP 90-beta 4	reviewed	505	7	0.956
FXR1	Q9P035	Q9P035	PTPLAD1 BIND1 HACD3	Very-long-chain (3R)-3-hydroxyacyl-[acyl-carrier protein] dehydratase 3 (EC 4.2.1.134) (3-hydroxyacyl-CoA dehydratase 3) (HACD3) (Butyrate-induced protein 1) (B-ind1) (hB-ind1) (Protein tyrosine phosphatase-like protein PTPLAD1) (Protein-tyrosine phosphat	reviewed	362	2	0.86
FXR1	Q99714	Q99714	HSD17B10 ERAB HADH2 MRPP2 SCHAD XH98G2	3-hydroxyacyl-CoA dehydrogenase type-2 (EC 1.1.1.35) (17-beta-hydroxysteroid dehydrogenase 10) (17-beta-HSD 10) (EC 1.1.1.51) (3-hydroxy-2-methylbutyryl-CoA dehydrogenase) (EC 1.1.1.178) (3-hydroxyacyl-CoA dehydrogenase type II) (Endoplasmic reticulum-ass	reviewed	261	10	0.988
FXR1	P51858	P51858	HDGF HMG1L2	Hepatoma-derived growth factor (HDGF) (High mobility group protein 1-like 2) (HMG-1L2)	reviewed	240	6	0.974
FXR1	Q86Y56	Q86Y56	HEATR2	HEAT repeat-containing protein 2	reviewed	855	2	0.804
FXR1	Q9BYK8	Q9BYK8	HELZ2 KIAA1769 PRIC285	Helicase with zinc finger domain 2 (ATP-dependent helicase PRIC285) (Helicase with zinc finger 2, transcriptional coactivator) (PPAR-alpha-interacting complex protein 285) (PPAR-gamma DNA-binding domain-interacting protein 1) (PDIP1) (PPAR-gamma DBD-inter	reviewed	2649	10	0.99
FXR1	P36551	P36551	CPOX CPO CPX	Coproporphyrinogen-III oxidase, mitochondrial (COX) (Coprogen oxidase) (Coproporphyrinogenase) (EC 1.3.3.3)	reviewed	454	3	0.882
FXR1	P02790	P02790	HPX	Hemopexin (Beta-1B-glycoprotein)	reviewed	462	3	0.886
FXR1	B2RPK0	B2RPK0	HMGB1P1 HMG1L1 HMGB1L1	Putative high mobility group protein B1-like 1 (High mobility group protein B1 pseudogene 1) (Putative high mobility group protein 1-like 1) (HMG-1L1)	reviewed	211	3	0.914
FXR1	Q8IV36-3	Q8IV36	HID1 C17orf28 DMC1	Protein HID1 (Down-regulated in multiple cancers 1) (HID1 domain-containing protein) (Protein hid-1 homolog)	reviewed	788	2	0.872
FXR1	P49773	P49773	HINT1 HINT PKCI1 PRKCNH1	Histidine triad nucleotide-binding protein 1 (EC 3.-.-.-) (Adenosine 5'-monophosphoramidase) (Protein kinase C inhibitor 1) (Protein kinase C-interacting protein 1) (PKCI-1)	reviewed	126	7	0.988
FXR1	P26583	P26583	HMGB2 HMG2	High mobility group protein B2 (High mobility group protein 2) (HMG-2)	reviewed	209	9	0.982
FXR1	P35914	P35914	HMGCL	Hydroxymethylglutaryl-CoA lyase, mitochondrial (HL) (HMG-CoA lyase) (EC 4.1.3.4) (3-hydroxy-3-methylglutarate-CoA lyase)	reviewed	325	4	0.922
FXR1	P07910-2	P07910	HNRNPC HNRPC	Heterogeneous nuclear ribonucleoproteins C1/C2 (hnRNP C1/C2)	reviewed	306	25	1
FXR1	P14866-2	P14866	HNRNPL HNRPL P/OKcl.14	Heterogeneous nuclear ribonucleoprotein L (hnRNP L)	reviewed	589	2	0.848
FXR1	O60506-2	O60506	SYNCRIP HNRPQ NSAP1	Heterogeneous nuclear ribonucleoprotein Q (hnRNP Q) (Glycine- and tyrosine-rich RNA-binding protein) (GRY-RBP) (NS1-associated protein 1) (Synaptotagmin-binding, cytoplasmic RNA-interacting protein)	reviewed	623	2	0.886
FXR1	Q5SSJ5	Q5SSJ5	HP1BP3	Heterochromatin protein 1-binding protein 3 (Protein HP1-BP74)	reviewed	553	4	0.932
FXR1	Q9NZL4	Q9NZL4	HSPBP1 HSPBP PP1845	Hsp70-binding protein 1 (HspBP1) (Heat shock protein-binding protein 1) (Hsp70-binding protein 2) (HspBP2) (Hsp70-interacting protein 1) (Hsp70-interacting protein 2)	reviewed	362	3	0.902
FXR1	Q96IR7	Q96IR7	HPDL GLOXD1	4-hydroxyphenylpyruvate dioxygenase-like protein (EC 1.13.-.-) (Glyoxalase domain-containing protein 1)	reviewed	371	4	0.936
FXR1	P00492	P00492	HPRT1 HPRT	Hypoxanthine-guanine phosphoribosyltransferase (HGPRT) (HGPRTase) (EC 2.4.2.8)	reviewed	218	2	0.872
FXR1	P08107-2	P08107	HSPA1A HSPA1 HSX70; HSPA1B	Heat shock 70 kDa protein 1A/1B (Heat shock 70 kDa protein 1/2) (HSP70-1/HSP70-2) (HSP70.1/HSP70.2)	reviewed	641	10	0.976
FXR1	Q7Z6Z7-3	Q7Z6Z7	HUWE1 KIAA0312 KIAA1578 UREB1 HSPC272	E3 ubiquitin-protein ligase HUWE1 (EC 6.3.2.-) (ARF-binding protein 1) (ARF-BP1) (HECT, UBA and WWE domain-containing protein 1) (Homologous to E6AP carboxyl terminus homologous protein 9) (HectH9) (Large structure of UREB1) (LASU1) (Mcl-1 ubiquitin ligas	reviewed	4374	9	0.988
FXR1	P19367-2	P19367	HK1	Hexokinase-1 (EC 2.7.1.1) (Brain form hexokinase) (Hexokinase type I) (HK I)	reviewed	917	8	0.97
FXR1	P52789	P52789	HK2	Hexokinase-2 (EC 2.7.1.1) (Hexokinase type II) (HK II) (Muscle form hexokinase)	reviewed	917	13	0.988
FXR1	Q9Y4L1	Q9Y4L1	HYOU1 GRP170 ORP150	Hypoxia up-regulated protein 1 (150 kDa oxygen-regulated protein) (ORP-150) (170 kDa glucose-regulated protein) (GRP-170)	reviewed	999	6	0.968
FXR1	Q7Z5L9	Q7Z5L9	IRF2BP2	Interferon regulatory factor 2-binding protein 2 (IRF-2-binding protein 2) (IRF-2BP2)	reviewed	587	2	0.85
FXR1	P14735	P14735	IDE	Insulin-degrading enzyme (EC 3.4.24.56) (Abeta-degrading protease) (Insulin protease) (Insulinase) (Insulysin)	reviewed	1019	4	0.94
FXR1	P50213	P50213	IDH3A	Isocitrate dehydrogenase [NAD] subunit alpha, mitochondrial (EC 1.1.1.41) (Isocitric dehydrogenase subunit alpha) (NAD(+)-specific ICDH subunit alpha)	reviewed	366	3	0.904
FXR1	O43837	O43837	IDH3B	Isocitrate dehydrogenase [NAD] subunit beta, mitochondrial (EC 1.1.1.41) (Isocitric dehydrogenase subunit beta) (NAD(+)-specific ICDH subunit beta)	reviewed	385	2	0.84
FXR1	O75874	O75874	IDH1 PICD	Isocitrate dehydrogenase [NADP] cytoplasmic (IDH) (EC 1.1.1.42) (Cytosolic NADP-isocitrate dehydrogenase) (IDP) (NADP(+)-specific ICDH) (Oxalosuccinate decarboxylase)	reviewed	414	9	0.96
FXR1	P48735	P48735	IDH2	Isocitrate dehydrogenase [NADP], mitochondrial (IDH) (EC 1.1.1.42) (ICD-M) (IDP) (NADP(+)-specific ICDH) (Oxalosuccinate decarboxylase)	reviewed	452	13	0.788
FXR1	Q13907	Q13907	IDI1	Isopentenyl-diphosphate Delta-isomerase 1 (EC 5.3.3.2) (Isopentenyl pyrophosphate isomerase 1) (IPP isomerase 1) (IPPI1)	reviewed	227	2	0.852
FXR1	Q9Y6M1-1	Q9Y6M1	IGF2BP2 IMP2 VICKZ2	Insulin-like growth factor 2 mRNA-binding protein 2 (IGF2 mRNA-binding protein 2) (IMP-2) (Hepatocellular carcinoma autoantigen p62) (IGF-II mRNA-binding protein 2) (VICKZ family member 2)	reviewed	599	7	0.96
FXR1	P20042	P20042	EIF2S2 EIF2B	Eukaryotic translation initiation factor 2 subunit 2 (Eukaryotic translation initiation factor 2 subunit beta) (eIF-2-beta)	reviewed	333	13	0.914
FXR1	Q2VIR3	Q2VIR3	EIF2S3L	Putative eukaryotic translation initiation factor 2 subunit 3-like protein (Eukaryotic translation initiation factor 2 subunit gamma A) (eIF-2-gamma A) (eIF-2gA)	reviewed	472	3	0.906
FXR1	O60841	O60841	EIF5B IF2 KIAA0741	Eukaryotic translation initiation factor 5B (eIF-5B) (Translation initiation factor IF-2)	reviewed	1220	4	0.936
FXR1	Q14240	Q14240	EIF4A2 DDX2B EIF4F	Eukaryotic initiation factor 4A-II (eIF-4A-II) (eIF4A-II) (EC 3.6.4.13) (ATP-dependent RNA helicase eIF4A-2)	reviewed	407	16	0.998
FXR1	O60573	O60573	EIF4E2 EIF4EL3	Eukaryotic translation initiation factor 4E type 2 (eIF-4E type 2) (eIF4E type 2) (Eukaryotic translation initiation factor 4E homologous protein) (Eukaryotic translation initiation factor 4E-like 3) (eIF4E-like protein 4E-LP) (mRNA cap-binding protein 4E	reviewed	245	2	0.858
FXR1	P06730-2	P06730	EIF4E EIF4EL1 EIF4F	Eukaryotic translation initiation factor 4E (eIF-4E) (eIF4E) (eIF-4F 25 kDa subunit) (mRNA cap-binding protein)	reviewed	217	5	0.948
FXR1	G5E9S1	Q04637	EIF4G1 EIF4F EIF4G EIF4GI	Eukaryotic translation initiation factor 4 gamma 1 (eIF-4-gamma 1) (eIF-4G 1) (eIF-4G1) (p220)	reviewed	1599	62	0.97
FXR1	P56537	P56537	EIF6 EIF3A ITGB4BP OK/SW-cl.27	Eukaryotic translation initiation factor 6 (eIF-6) (B(2)GCN homolog) (B4 integrin interactor) (CAB) (p27(BBP))	reviewed	245	7	0.706
FXR1	P78318	P78318	IGBP1 IBP1	Immunoglobulin-binding protein 1 (B-cell signal transduction molecule alpha 4) (Protein alpha-4) (CD79a-binding protein 1) (Protein phosphatase 2/4/6 regulatory subunit) (Renal carcinoma antigen NY-REN-16)	reviewed	339	4	0.906
FXR1	Q8N6C5-4	Q8N6C5	IGSF1 IGDC1 KIAA0364 PGSF2	Immunoglobulin superfamily member 1 (IgSF1) (Immunoglobulin-like domain-containing protein 1) (Inhibin-binding protein) (InhBP) (Pituitary gland-specific factor 2) (p120)	reviewed	1336	2	0.846
FXR1	P30740	P30740	SERPINB1 ELANH2 MNEI PI2	Leukocyte elastase inhibitor (LEI) (Monocyte/neutrophil elastase inhibitor) (EI) (M/NEI) (Peptidase inhibitor 2) (PI-2) (Serpin B1)	reviewed	379	18	0.778
FXR1	Q12906-4	Q12906	ILF3 DRBF MPHOSPH4 NF90	Interleukin enhancer-binding factor 3 (Double-stranded RNA-binding protein 76) (DRBP76) (M-phase phosphoprotein 4) (MPP4) (Nuclear factor associated with dsRNA) (NFAR) (Nuclear factor of activated T-cells 90 kDa) (NF-AT-90) (Translational control protein	reviewed	894	20	1
FXR1	P52292	P52292	KPNA2 RCH1 SRP1	Importin subunit alpha-1 (Karyopherin subunit alpha-2) (RAG cohort protein 1) (SRP1-alpha)	reviewed	529	9	0.976
FXR1	O00629	O00629	KPNA4 QIP1	Importin subunit alpha-3 (Importin alpha Q1) (Qip1) (Karyopherin subunit alpha-4)	reviewed	521	4	0.91
FXR1	O00505	O00505	KPNA3 QIP2	Importin subunit alpha-4 (Importin alpha Q2) (Qip2) (Karyopherin subunit alpha-3) (SRP1-gamma)	reviewed	521	2	0.828
FXR1	P52294	P52294	KPNA1 RCH2	Importin subunit alpha-5 (Karyopherin subunit alpha-1) (Nucleoprotein interactor 1) (NPI-1) (RAG cohort protein 2) (SRP1-beta) [Cleaved into: Importin subunit alpha-5, N-terminally processed]	reviewed	538	7	0.954
FXR1	Q14974	Q14974	KPNB1 NTF97	Importin subunit beta-1 (Importin-90) (Karyopherin subunit beta-1) (Nuclear factor p97) (Pore targeting complex 97 kDa subunit) (PTAC97)	reviewed	876	24	0.996
FXR1	Q16891	Q16891	IMMT HMP MINOS2 PIG4 PIG52	Mitochondrial inner membrane protein (Cell proliferation-inducing gene 4/52 protein) (Mitofilin) (p87/89)	reviewed	758	15	0.99
FXR1	Q27J81	Q27J81	INF2 C14orf151 C14orf173	Inverted formin-2 (HBEBP2-binding protein C)	reviewed	1249	13	0.99
FXR1	Q96HW7-2	Q96HW7	INTS4 MSTP093	Integrator complex subunit 4 (Int4)	reviewed	963	2	0.876
FXR1	Q8TEX9	Q8TEX9	IPO4 IMP4B RANBP4	Importin-4 (Imp4) (Importin-4b) (Imp4b) (Ran-binding protein 4) (RanBP4)	reviewed	1081	4	0.926
FXR1	O00410-2	O00410	IPO5 KPNB3 RANBP5	Importin-5 (Imp5) (Importin subunit beta-3) (Karyopherin beta-3) (Ran-binding protein 5) (RanBP5)	reviewed	1097	12	0.996
FXR1	O95373	O95373	IPO7 RANBP7	Importin-7 (Imp7) (Ran-binding protein 7) (RanBP7)	reviewed	1038	9	0.972
FXR1	O15397	O15397	IPO8 RANBP8	Importin-8 (Imp8) (Ran-binding protein 8) (RanBP8)	reviewed	1037	2	0.754
FXR1	Q96P70	Q96P70	IPO9 IMP9 KIAA1192 RANBP9 HSPC273	Importin-9 (Imp9) (Ran-binding protein 9) (RanBP9)	reviewed	1041	5	0.948
FXR1	Q9H2U2-2	Q9H2U2	PPA2 HSPC124	Inorganic pyrophosphatase 2, mitochondrial (EC 3.6.1.1) (Pyrophosphatase SID6-306) (Pyrophosphate phospho-hydrolase 2) (PPase 2)	reviewed	334	4	0.88
FXR1	Q15181	Q15181	PPA1 IOPPP PP	Inorganic pyrophosphatase (EC 3.6.1.1) (Pyrophosphate phospho-hydrolase) (PPase)	reviewed	289	9	0.786
FXR1	P46940	P46940	IQGAP1 KIAA0051	Ras GTPase-activating-like protein IQGAP1 (p195)	reviewed	1657	91	0.854
FXR1	Q86VI3	Q86VI3	IQGAP3	Ras GTPase-activating-like protein IQGAP3	reviewed	1631	3	0.876
FXR1	G5E9H1	P23229	ITGA6	Integrin alpha-6 (CD49 antigen-like family member F) (VLA-6) (CD antigen CD49f) [Cleaved into: Integrin alpha-6 heavy chain; Integrin alpha-6 light chain]	reviewed	1130	6	0.946
FXR1	P16144-4	P16144	ITGB4	Integrin beta-4 (GP150) (CD antigen CD104)	reviewed	1822	23	1
FXR1	Q14624-2	Q14624	ITIH4 IHRP ITIHL1 PK120 PRO1851	Inter-alpha-trypsin inhibitor heavy chain H4 (ITI heavy chain H4) (ITI-HC4) (Inter-alpha-inhibitor heavy chain 4) (Inter-alpha-trypsin inhibitor family heavy chain-related protein) (IHRP) (Plasma kallikrein sensitive glycoprotein 120) (Gp120) (PK-120) [Cl	reviewed	930	2	0.87
FXR1	Q14573	Q14573	ITPR3	Inositol 1,4,5-trisphosphate receptor type 3 (IP3 receptor isoform 3) (IP3R 3) (InsP3R3) (Type 3 inositol 1,4,5-trisphosphate receptor) (Type 3 InsP3 receptor)	reviewed	2671	7	0.966
FXR1	P26440	P26440	IVD	Isovaleryl-CoA dehydrogenase, mitochondrial (IVD) (EC 1.3.8.4)	reviewed	423	3	0.91
FXR1	O60271-9	O60271	SPAG9 HSS KIAA0516 MAPK8IP4 SYD1 HLC6	C-Jun-amino-terminal kinase-interacting protein 4 (JIP-4) (JNK-interacting protein 4) (Cancer/testis antigen 89) (CT89) (Human lung cancer oncogene 6 protein) (HLC-6) (JNK-associated leucine-zipper protein) (JLP) (Mitogen-activated protein kinase 8-intera	reviewed	1321	2	0.878
FXR1	P08237	P08237	PFKM PFKX	6-phosphofructokinase, muscle type (EC 2.7.1.11) (Phosphofructo-1-kinase isozyme A) (PFK-A) (Phosphofructokinase-M) (Phosphofructokinase 1) (Phosphohexokinase)	reviewed	780	7	0.966
FXR1	P17858	P17858	PFKL	6-phosphofructokinase, liver type (EC 2.7.1.11) (Phosphofructo-1-kinase isozyme B) (PFK-B) (Phosphofructokinase 1) (Phosphohexokinase)	reviewed	780	13	0.984
FXR1	P17612	P17612	PRKACA PKACA	cAMP-dependent protein kinase catalytic subunit alpha (PKA C-alpha) (EC 2.7.11.11)	reviewed	351	3	0.872
FXR1	P48729	P48729	CSNK1A1	Casein kinase I isoform alpha (CKI-alpha) (EC 2.7.11.1) (CK1)	reviewed	337	19	1
FXR1	P48730-2	P48730	CSNK1D HCKID	Casein kinase I isoform delta (CKI-delta) (CKId) (EC 2.7.11.1) (Tau-protein kinase CSNK1D) (EC 2.7.11.26)	reviewed	415	3	0.892
FXR1	Q9BQ13	Q9BQ13	KCTD14	BTB/POZ domain-containing protein KCTD14	reviewed	255	2	0.824
FXR1	Q9P0J7	Q9P0J7	KCMF1 FIGC ZZZ1	E3 ubiquitin-protein ligase KCMF1 (EC 6.3.2.-) (FGF-induced in gastric cancer) (Potassium channel modulatory factor) (PCMF) (ZZ-type zinc finger-containing protein 1)	reviewed	381	2	0.848
FXR1	P12532	P12532	CKMT1A CKMT; CKMT1B CKMT	Creatine kinase U-type, mitochondrial (EC 2.7.3.2) (Acidic-type mitochondrial creatine kinase) (Mia-CK) (Ubiquitous mitochondrial creatine kinase) (U-MtCK)	reviewed	417	17	0.998
FXR1	P30085	P30085	CMPK1 CMK CMPK UCK UMK UMPK	UMP-CMP kinase (EC 2.7.4.14) (Deoxycytidylate kinase) (CK) (dCMP kinase) (Nucleoside-diphosphate kinase) (EC 2.7.4.6) (Uridine monophosphate/cytidine monophosphate kinase) (UMP/CMP kinase) (UMP/CMPK)	reviewed	196	5	0.952
FXR1	Q9Y2K7-2	Q9Y2K7	KDM2A CXXC8 FBL7 FBXL11 JHDM1A KIAA1004	Lysine-specific demethylase 2A (EC 1.14.11.27) (CXXC-type zinc finger protein 8) (F-box and leucine-rich repeat protein 11) (F-box protein FBL7) (F-box protein Lilina) (F-box/LRR-repeat protein 11) (JmjC domain-containing histone demethylation protein 1A)	reviewed	1162	3	0.89
FXR1	F8VPJ2	Q9NQT8	KIF13B GAKIN KIAA0639	Kinesin-like protein KIF13B (Kinesin-like protein GAKIN)	reviewed	1826	2	0.862
FXR1	F5H0C3	Q7Z4S6	KIF21A KIAA1708 KIF2	Kinesin-like protein KIF21A (Kinesin-like protein KIF2) (Renal carcinoma antigen NY-REN-62)	reviewed	1674	2	0.832
FXR1	P46013	P46013	MKI67	Antigen KI-67	reviewed	3256	39	0.98
FXR1	Q9NS87-2	Q9NS87	KIF15 KLP2 KNSL7	Kinesin-like protein KIF15 (Kinesin-like protein 2) (hKLP2) (Kinesin-like protein 7) (Serologically defined breast cancer antigen NY-BR-62)	reviewed	1388	3	0.89
FXR1	O95239	O95239	KIF4A KIF4	Chromosome-associated kinesin KIF4A (Chromokinesin-A)	reviewed	1232	6	0.968
FXR1	Q9BW19	Q9BW19	KIFC1 HSET KNSL2	Kinesin-like protein KIFC1 (Kinesin-like protein 2) (Kinesin-related protein HSET)	reviewed	673	3	0.902
FXR1	P04183	P04183	TK1	Thymidine kinase, cytosolic (EC 2.7.1.21)	reviewed	234	7	0.972
FXR1	Q8IUC1	Q8IUC1	KRTAP11-1 KAP11.1 KRTAP11.1	Keratin-associated protein 11-1 (High sulfur keratin-associated protein 11.1)	reviewed	163	3	0.894
FXR1	P0C7H8	P0C7H8	KRTAP2-3 KAP2.3 KRTAP2.3	Keratin-associated protein 2-3 (High sulfur keratin-associated protein 2.4) (Keratin-associated protein 2.3)	reviewed	128	5	0.982
FXR1	Q9BYR8	Q9BYR8	KRTAP3-1 KAP3.1 KRTAP3.1	Keratin-associated protein 3-1 (High sulfur keratin-associated protein 3.1) (Keratin-associated protein 3.1)	reviewed	98	17	1
FXR1	Q9BYR7	Q9BYR7	KRTAP3-2 KAP3.2 KRTAP3.2	Keratin-associated protein 3-2 (High sulfur keratin-associated protein 3.2) (Keratin-associated protein 3.2)	reviewed	98	3	0.966
FXR1	Q9BYR6	Q9BYR6	KRTAP3-3 KAP3.3 KRTAP3.3	Keratin-associated protein 3-3 (High sulfur keratin-associated protein 3.3) (Keratin-associated protein 3.3)	reviewed	98	3	0.948
FXR1	Q9BYR4	Q9BYR4	KRTAP4-3 KAP4.3 KRTAP4.3	Keratin-associated protein 4-3 (Keratin-associated protein 4.3) (Ultrahigh sulfur keratin-associated protein 4.3)	reviewed	195	2	0.888
FXR1	Q9BYQ3	Q9BYQ3	KRTAP9-3 KAP9.3 KRTAP9.3	Keratin-associated protein 9-3 (Keratin-associated protein 9.3) (Ultrahigh sulfur keratin-associated protein 9.3)	reviewed	159	7	0.986
FXR1	Q13601	Q13601	KRR1 HRB2	KRR1 small subunit processome component homolog (HIV-1 Rev-binding protein 2) (KRR-R motif-containing protein 1) (Rev-interacting protein 1) (Rip-1)	reviewed	381	2	0.836
FXR1	Q9HA64	Q9HA64	FN3KRP	Ketosamine-3-kinase (EC 2.7.1.-) (Fructosamine-3-kinase-related protein) (FN3K-RP) (FN3K-related protein)	reviewed	309	2	0.852
FXR1	P23919	P23919	DTYMK CDC8 TMPK TYMK	Thymidylate kinase (EC 2.7.4.9) (dTMP kinase)	reviewed	212	7	0.978
FXR1	Q86UP2-3	Q86UP2	KTN1 CG1 KIAA0004	Kinectin (CG-1 antigen) (Kinesin receptor)	reviewed	1357	2	0.832
FXR1	Q6P1M3-2	Q6P1M3	LLGL2	Lethal(2) giant larvae protein homolog 2 (HGL)	reviewed	1020	21	0.804
FXR1	Q53H82	Q53H82	LACTB2 CGI-83	Beta-lactamase-like protein 2 (EC 3.-.-.-)	reviewed	288	7	0.962
FXR1	O00515	O00515	LAD1 LAD	Ladinin-1 (Lad-1) (Linear IgA disease antigen) (LADA)	reviewed	517	19	0.734
FXR1	Q9NS86	Q9NS86	LANCL2 GPR69B TASP	LanC-like protein 2 (Testis-specific adriamycin sensitivity protein)	reviewed	450	2	0.866
FXR1	P42167	P42167	TMPO LAP2	Lamina-associated polypeptide 2, isoforms beta/gamma (Thymopoietin, isoforms beta/gamma) (TP beta/gamma) (Thymopoietin-related peptide isoforms beta/gamma) (TPRP isoforms beta/gamma) [Cleaved into: Thymopoietin (TP) (Splenin); Thymopentin (TP5)]	reviewed	454	25	0.946
FXR1	Q92615	Q92615	LARP4B KIAA0217 LARP5	La-related protein 4B (La ribonucleoprotein domain family member 4B) (La ribonucleoprotein domain family member 5) (La-related protein 5)	reviewed	738	4	0.922
FXR1	Q6PKG0	Q6PKG0	LARP1 KIAA0731 LARP	La-related protein 1 (La ribonucleoprotein domain family member 1)	reviewed	1096	3	0.888
FXR1	Q9Y4W2-4	Q9Y4W2	LAS1L MSTP060	Ribosomal biogenesis protein LAS1L (Protein LAS1 homolog)	reviewed	734	2	0.86
FXR1	Q14847-2	Q14847	LASP1 MLN50	LIM and SH3 domain protein 1 (LASP-1) (Metastatic lymph node gene 50 protein) (MLN 50)	reviewed	261	10	0.98
FXR1	P05455	P05455	SSB	Lupus La protein (La autoantigen) (La ribonucleoprotein) (Sjoegren syndrome type B antigen) (SS-B)	reviewed	408	8	0.984
FXR1	Q9Y383	Q9Y383	LUC7L2 CGI-59 CGI-74	Putative RNA-binding protein Luc7-like 2	reviewed	392	7	0.954
FXR1	P00338-3	P00338	LDHA PIG19	L-lactate dehydrogenase A chain (LDH-A) (EC 1.1.1.27) (Cell proliferation-inducing gene 19 protein) (LDH muscle subunit) (LDH-M) (Renal carcinoma antigen NY-REN-59)	reviewed	332	12	0.992
FXR1	Q08380	Q08380	LGALS3BP M2BP	Galectin-3-binding protein (Basement membrane autoantigen p105) (Lectin galactoside-binding soluble 3-binding protein) (Mac-2-binding protein) (MAC2BP) (Mac-2 BP) (Tumor-associated antigen 90K)	reviewed	585	2	0.84
FXR1	Q04760	Q04760	GLO1	Lactoylglutathione lyase (EC 4.4.1.5) (Aldoketomutase) (Glyoxalase I) (Glx I) (Ketone-aldehyde mutase) (Methylglyoxalase) (S-D-lactoylglutathione methylglyoxal lyase)	reviewed	184	3	0.916
FXR1	Q9UHB6	Q9UHB6	LIMA1 EPLIN SREBP3 PP624	LIM domain and actin-binding protein 1 (Epithelial protein lost in neoplasm)	reviewed	759	60	1
FXR1	Q9NUP9	Q9NUP9	LIN7C MALS3 VELI3	Protein lin-7 homolog C (Lin-7C) (Mammalian lin-seven protein 3) (MALS-3) (Vertebrate lin-7 homolog 3) (Veli-3)	reviewed	197	6	0.97
FXR1	P43034	P43034	PAFAH1B1 LIS1 MDCR MDS PAFAHA	Platelet-activating factor acetylhydrolase IB subunit alpha (Lissencephaly-1 protein) (LIS-1) (PAF acetylhydrolase 45 kDa subunit) (PAF-AH 45 kDa subunit) (PAF-AH alpha) (PAFAH alpha)	reviewed	410	6	0.914
FXR1	P09960	P09960	LTA4H LTA4	Leukotriene A-4 hydrolase (LTA-4 hydrolase) (EC 3.3.2.6) (Leukotriene A(4) hydrolase)	reviewed	611	4	0.91
FXR1	P02545-2	P02545	LMNA LMN1	Prelamin-A/C [Cleaved into: Lamin-A/C (70 kDa lamin) (Renal carcinoma antigen NY-REN-32)]	reviewed	664	142	1
FXR1	Q8WWI1	Q8WWI1	LMO7 FBX20 FBXO20 KIAA0858	LIM domain only protein 7 (LMO-7) (F-box only protein 20) (LOMP)	reviewed	1683	26	1
FXR1	P42704	P42704	LRPPRC LRP130	Leucine-rich PPR motif-containing protein, mitochondrial (130 kDa leucine-rich protein) (LRP 130) (GP130)	reviewed	1394	73	1
FXR1	Q8N1G4	Q8N1G4	LRRC47 KIAA1185	Leucine-rich repeat-containing protein 47	reviewed	583	9	0.972
FXR1	Q96AG4	Q96AG4	LRRC59 PRO1855	Leucine-rich repeat-containing protein 59 (Ribosome-binding protein p34) (p34)	reviewed	307	16	0.712
FXR1	Q9BTT6	Q9BTT6	LRRC1 LANO	Leucine-rich repeat-containing protein 1 (LANO adapter protein) (LAP and no PDZ protein)	reviewed	524	2	0.842
FXR1	Q32MZ4-3	Q32MZ4	LRRFIP1 GCF2 TRIP	Leucine-rich repeat flightless-interacting protein 1 (LRR FLII-interacting protein 1) (GC-binding factor 2) (TAR RNA-interacting protein)	reviewed	808	3	0.894
FXR1	Q9BX40	Q9BX40	LSM14B C20orf40 FAM61B RAP55B	Protein LSM14 homolog B (Protein FAM61B) (RNA-associated protein 55B) (hRAP55B)	reviewed	385	5	0.92
FXR1	Q9H089	Q9H089	LSG1	Large subunit GTPase 1 homolog (hLsg1) (EC 3.6.1.-)	reviewed	658	7	0.93
FXR1	Q3MHD2	Q3MHD2	LSM12	Protein LSM12 homolog	reviewed	195	2	0.844
FXR1	Q9Y333	Q9Y333	LSM2 C6orf28 G7B	U6 snRNA-associated Sm-like protein LSm2 (Protein G7b) (Small nuclear ribonuclear protein D homolog) (snRNP core Sm-like protein Sm-x5)	reviewed	95	2	0.92
FXR1	Q9UK45	Q9UK45	LSM7	U6 snRNA-associated Sm-like protein LSm7	reviewed	103	2	0.904
FXR1	Q9NX58	Q9NX58	LYAR PNAS-5	Cell growth-regulating nucleolar protein	reviewed	379	2	0.872
FXR1	O95372	O95372	LYPLA2 APT2	Acyl-protein thioesterase 2 (APT-2) (EC 3.1.2.-) (Lysophospholipase II) (LPL-II) (LysoPLA II)	reviewed	231	5	0.948
FXR1	Q86UE4	Q86UE4	MTDH AEG1 LYRIC	Protein LYRIC (3D3/LYRIC) (Astrocyte elevated gene-1 protein) (AEG-1) (Lysine-rich CEACAM1 co-isolated protein) (Metadherin) (Metastasis adhesion protein)	reviewed	582	4	0.924
FXR1	F5GY65	Q02978	SLC25A11 SLC20A4	Mitochondrial 2-oxoglutarate/malate carrier protein (OGCP) (Solute carrier family 25 member 11)	reviewed	314	4	0.908
FXR1	Q9BXY0	Q9BXY0	MAK16 RBM13	Protein MAK16 homolog (NNP78) (Protein RBM13)	reviewed	300	2	0.822
FXR1	P27816-6	P27816	MAP4	Microtubule-associated protein 4 (MAP-4)	reviewed	1152	2	0.862
FXR1	E9PCP3	Q14244	MAP7	Ensconsin (Epithelial microtubule-associated protein of 115 kDa) (E-MAP-115) (Microtubule-associated protein 7) (MAP-7)	reviewed	749	4	0.928
FXR1	Q15691	Q15691	MAPRE1	Microtubule-associated protein RP/EB family member 1 (APC-binding protein EB1) (End-binding protein 1) (EB1)	reviewed	268	5	0.924
FXR1	P43243	P43243	MATR3 KIAA0723	Matrin-3	reviewed	847	19	0.994
FXR1	Q9BQG0	Q9BQG0	MYBBP1A P160	Myb-binding protein 1A	reviewed	1328	13	0.986
FXR1	Q9NR56	Q9NR56	MBNL1 EXP KIAA0428 MBNL	Muscleblind-like protein 1 (Triplet-expansion RNA-binding protein)	reviewed	388	2	0.842
FXR1	P25205	P25205	MCM3	DNA replication licensing factor MCM3 (EC 3.6.4.12) (DNA polymerase alpha holoenzyme-associated protein P1) (P1-MCM3) (RLF subunit beta) (p102)	reviewed	808	16	0.99
FXR1	P33991	P33991	MCM4 CDC21	DNA replication licensing factor MCM4 (EC 3.6.4.12) (CDC21 homolog) (P1-CDC21)	reviewed	863	8	0.948
FXR1	P33993	P33993	MCM7 CDC47 MCM2	DNA replication licensing factor MCM7 (EC 3.6.4.12) (CDC47 homolog) (P1.1-MCM3)	reviewed	719	14	0.98
FXR1	Q9ULC4-3	Q9ULC4	MCTS1 MCT1	Malignant T-cell-amplified sequence 1 (MCT-1) (Multiple copies T-cell malignancies)	reviewed	181	2	0.844
FXR1	Q8NE86	Q8NE86	MCU C10orf42 CCDC109A	Calcium uniporter protein, mitochondrial (Coiled-coil domain-containing protein 109A)	reviewed	351	2	0.858
FXR1	P40925	P40925	MDH1 MDHA	Malate dehydrogenase, cytoplasmic (EC 1.1.1.37) (Cytosolic malate dehydrogenase) (Diiodophenylpyruvate reductase) (EC 1.1.1.96)	reviewed	334	7	0.928
FXR1	Q5R2V8	Q9Y316	MEMO1 C2orf4 MEMO NS5ATP7 CGI-27	Protein MEMO1 (C21orf19-like protein) (Hepatitis C virus NS5A-transactivated protein 7) (HCV NS5A-transactivated protein 7) (Mediator of ErbB2-driven cell motility 1) (Mediator of cell motility 1) (Memo-1)	reviewed	297	3	0.902
FXR1	P31153	P31153	MAT2A AMS2 MATA2	S-adenosylmethionine synthase isoform type-2 (AdoMet synthase 2) (EC 2.5.1.6) (Methionine adenosyltransferase 2) (MAT 2) (Methionine adenosyltransferase II) (MAT-II)	reviewed	395	5	0.922
FXR1	P55081	P55081	MFAP1	Microfibrillar-associated protein 1	reviewed	439	2	0.842
FXR1	Q96A72	Q96A72	MAGOHB MAGOH2	Protein mago nashi homolog 2	reviewed	148	9	0.994
FXR1	Q16539-3	Q16539	MAPK14 CSBP CSBP1 CSBP2 CSPB1 MXI2 SAPK2A	Mitogen-activated protein kinase 14 (MAP kinase 14) (MAPK 14) (EC 2.7.11.24) (Cytokine suppressive anti-inflammatory drug-binding protein) (CSAID-binding protein) (CSBP) (MAP kinase MXI2) (MAX-interacting protein 2) (Mitogen-activated protein kinase p38 a	reviewed	360	2	0.868
FXR1	Q9BYG3	Q9BYG3	MKI67IP NIFK NOPP34	MKI67 FHA domain-interacting nucleolar phosphoprotein (Nucleolar phosphoprotein Nopp34) (Nucleolar protein interacting with the FHA domain of pKI-67) (hNIFK)	reviewed	293	4	0.942
FXR1	Q14165	Q14165	MLEC KIAA0152	Malectin	reviewed	292	4	0.92
FXR1	Q96T76-9	Q96T76	MMS19 MMS19L	MMS19 nucleotide excision repair protein homolog (hMMS19) (MET18 homolog) (MMS19-like protein)	reviewed	1030	3	0.888
FXR1	Q9BU76	Q9BU76	MMTAG2 C1orf35	Multiple myeloma tumor-associated protein 2 (hMMTAG2)	reviewed	263	4	0.928
FXR1	Q13724	Q13724	MOGS GCS1	Mannosyl-oligosaccharide glucosidase (EC 3.2.1.106) (Processing A-glucosidase I)	reviewed	837	3	0.908
FXR1	Q02750	Q02750	MAP2K1 MEK1 PRKMK1	Dual specificity mitogen-activated protein kinase kinase 1 (MAP kinase kinase 1) (MAPKK 1) (MKK1) (EC 2.7.12.2) (ERK activator kinase 1) (MAPK/ERK kinase 1) (MEK 1)	reviewed	393	7	0.966
FXR1	P46734	P46734	MAP2K3 MEK3 MKK3 PRKMK3 SKK2	Dual specificity mitogen-activated protein kinase kinase 3 (MAP kinase kinase 3) (MAPKK 3) (EC 2.7.12.2) (MAPK/ERK kinase 3) (MEK 3) (Stress-activated protein kinase kinase 2) (SAPK kinase 2) (SAPKK-2) (SAPKK2)	reviewed	347	13	0.998
FXR1	Q13163-2	Q13163	MAP2K5 MEK5 MKK5 PRKMK5	Dual specificity mitogen-activated protein kinase kinase 5 (MAP kinase kinase 5) (MAPKK 5) (EC 2.7.12.2) (MAPK/ERK kinase 5) (MEK 5)	reviewed	448	2	0.854
FXR1	Q00325	Q00325	SLC25A3 PHC OK/SW-cl.48	Phosphate carrier protein, mitochondrial (Phosphate transport protein) (PTP) (Solute carrier family 25 member 3)	reviewed	362	2	0.83
FXR1	Q10713	Q10713	PMPCA INPP5E KIAA0123 MPPA	Mitochondrial-processing peptidase subunit alpha (EC 3.4.24.64) (Alpha-MPP) (P-55)	reviewed	525	3	0.904
FXR1	O75439	O75439	PMPCB MPPB	Mitochondrial-processing peptidase subunit beta (EC 3.4.24.64) (Beta-MPP) (P-52)	reviewed	489	2	0.868
FXR1	P43246	P43246	MSH2	DNA mismatch repair protein Msh2 (hMSH2) (MutS protein homolog 2)	reviewed	934	9	0.978
FXR1	Q13126	Q13126	MTAP MSAP	S-methyl-5'-thioadenosine phosphorylase (EC 2.4.2.28) (5'-methylthioadenosine phosphorylase) (MTA phosphorylase) (MTAP) (MTAPase)	reviewed	283	5	0.93
FXR1	Q9Y6C9	Q9Y6C9	MTCH2 MIMP HSPC032	Mitochondrial carrier homolog 2 (Met-induced mitochondrial protein)	reviewed	303	2	0.886
FXR1	Q9ULD2	Q9ULD2	MTUS1 ATBP ATIP GK1 KIAA1288 MTSG1	Microtubule-associated tumor suppressor 1 (AT2 receptor-binding protein) (Angiotensin-II type 2 receptor-interacting protein) (Mitochondrial tumor suppressor 1)	reviewed	1270	4	0.942
FXR1	Q92614-2	Q92614	MYO18A KIAA0216 MYSPDZ	Unconventional myosin-XVIIIa (Molecule associated with JAK3 N-terminus) (MAJN) (Myosin containing a PDZ domain)	reviewed	2054	4	0.906
FXR1	Q7Z406-6	Q7Z406	MYH14 KIAA2034 FP17425	Myosin-14 (Myosin heavy chain 14) (Myosin heavy chain, non-muscle IIc) (Non-muscle myosin heavy chain IIc) (NMHC II-C)	reviewed	1995	129	1
FXR1	O43795-2	O43795	MYO1B	Unconventional myosin-Ib (MYH-1c) (Myosin I alpha) (MMI-alpha) (MMIa)	reviewed	1136	6	0.94
FXR1	Q9UM54-6	Q9UM54	MYO6 KIAA0389	Unconventional myosin-VI (Unconventional myosin-6)	reviewed	1294	7	0.964
FXR1	Q9NZM1-6	Q9NZM1	MYOF FER1L3 KIAA1207	Myoferlin (Fer-1-like protein 3)	reviewed	2061	67	1
FXR1	P41227	P41227	NAA10 ARD1 ARD1A TE2	N-alpha-acetyltransferase 10 (EC 2.3.1.-) (EC 2.3.1.88) (N-terminal acetyltransferase complex ARD1 subunit homolog A) (NatA catalytic subunit)	reviewed	235	3	0.89
FXR1	Q9BXJ9	Q9BXJ9	NAA15 GA19 NARG1 NATH TBDN100	N-alpha-acetyltransferase 15, NatA auxiliary subunit (Gastric cancer antigen Ga19) (N-terminal acetyltransferase) (NMDA receptor-regulated protein 1) (Protein tubedown-1) (Tbdn100)	reviewed	866	8	0.978
FXR1	Q6N069-3	Q6N069	NAA16 NARG1L NAT2	N-alpha-acetyltransferase 16, NatA auxiliary subunit (NMDA receptor-regulated 1-like protein) (NARG1-like protein)	reviewed	864	2	0.858
FXR1	Q14CX7	Q14CX7	NAA25 C12orf30 MDM20 NAP1	N-alpha-acetyltransferase 25, NatB auxiliary subunit (Mitochondrial distribution and morphology protein 20) (N-terminal acetyltransferase B complex subunit MDM20) (NatB complex subunit MDM20) (N-terminal acetyltransferase B complex subunit NAA25) (p120)	reviewed	972	3	0.874
FXR1	O95777	O95777	NAA38 LSM8	N-alpha-acetyltransferase 38, NatC auxiliary subunit (U6 snRNA-associated Sm-like protein LSm8)	reviewed	96	3	0.952
FXR1	Q9UJ70	Q9UJ70	NAGK	N-acetyl-D-glucosamine kinase (N-acetylglucosamine kinase) (EC 2.7.1.59) (GlcNAc kinase)	reviewed	344	6	0.952
FXR1	Q9NX02-2	Q9NX02	NLRP2 NALP2 NBS1 PAN1 PYPAF2	NACHT, LRR and PYD domains-containing protein 2 (Nucleotide-binding site protein 1) (PYRIN domain and NACHT domain-containing protein 1) (PYRIN-containing APAF1-like protein 2)	reviewed	1062	12	0.992
FXR1	Q96P20-3	Q96P20	NLRP3 C1orf7 CIAS1 NALP3 PYPAF1	NACHT, LRR and PYD domains-containing protein 3 (Angiotensin/vasopressin receptor AII/AVP-like) (Caterpiller protein 1.1) (CLR1.1) (Cold autoinflammatory syndrome 1 protein) (Cryopyrin) (PYRIN-containing APAF1-like protein 1)	reviewed	1036	2	0.86
FXR1	Q9H0A0	Q9H0A0	NAT10 ALP KIAA1709	N-acetyltransferase 10 (EC 2.3.1.-)	reviewed	1025	12	0.986
FXR1	P00387-3	P00387	CYB5R3 DIA1	NADH-cytochrome b5 reductase 3 (B5R) (Cytochrome b5 reductase) (EC 1.6.2.2) (Diaphorase-1) [Cleaved into: NADH-cytochrome b5 reductase 3 membrane-bound form; NADH-cytochrome b5 reductase 3 soluble form]	reviewed	301	2	0.848
FXR1	Q09161	Q09161	NCBP1 CBP80 NCBP	Nuclear cap-binding protein subunit 1 (80 kDa nuclear cap-binding protein) (CBP80) (NCBP 80 kDa subunit)	reviewed	790	12	0.986
FXR1	Q9Y2A7	Q9Y2A7	NCKAP1 HEM2 KIAA0587 NAP1	Nck-associated protein 1 (NAP 1) (Membrane-associated protein HEM-2) (p125Nap1)	reviewed	1128	3	0.882
FXR1	P16435	P16435	POR CYPOR	NADPH--cytochrome P450 reductase (CPR) (P450R) (EC 1.6.2.4)	reviewed	677	8	0.96
FXR1	O60361	O60361	NME2P1	Putative nucleoside diphosphate kinase (NDK) (NDP kinase) (EC 2.7.4.6)	reviewed	137	17	0.996
FXR1	Q92597	Q92597	NDRG1 CAP43 DRG1 RTP	Protein NDRG1 (Differentiation-related gene 1 protein) (DRG-1) (N-myc downstream-regulated gene 1 protein) (Nickel-specific induction protein Cap43) (Reducing agents and tunicamycin-responsive protein) (RTP) (Rit42)	reviewed	394	7	0.948
FXR1	Q16795	Q16795	NDUFA9 NDUFS2L	NADH dehydrogenase [ubiquinone] 1 alpha subcomplex subunit 9, mitochondrial (Complex I-39kD) (CI-39kD) (NADH-ubiquinone oxidoreductase 39 kDa subunit)	reviewed	377	9	0.97
FXR1	P28331-2	P28331	NDUFS1	NADH-ubiquinone oxidoreductase 75 kDa subunit, mitochondrial (EC 1.6.5.3) (EC 1.6.99.3) (Complex I-75kD) (CI-75kD)	reviewed	727	5	0.932
FXR1	O75489	O75489	NDUFS3	NADH dehydrogenase [ubiquinone] iron-sulfur protein 3, mitochondrial (EC 1.6.5.3) (EC 1.6.99.3) (Complex I-30kD) (CI-30kD) (NADH-ubiquinone oxidoreductase 30 kDa subunit)	reviewed	264	6	0.946
FXR1	O75251	O75251	NDUFS7	NADH dehydrogenase [ubiquinone] iron-sulfur protein 7, mitochondrial (EC 1.6.5.3) (EC 1.6.99.3) (Complex I-20kD) (CI-20kD) (NADH-ubiquinone oxidoreductase 20 kDa subunit) (PSST subunit)	reviewed	213	2	0.864
FXR1	P19404	P19404	NDUFV2	NADH dehydrogenase [ubiquinone] flavoprotein 2, mitochondrial (EC 1.6.5.3) (EC 1.6.99.3) (NADH-ubiquinone oxidoreductase 24 kDa subunit)	reviewed	249	2	0.834
FXR1	O76041	O76041	NEBL LNEBL	Nebulette (Actin-binding Z-disk protein)	reviewed	1014	2	0.8
FXR1	Q92979	Q92979	EMG1 C2F	Ribosomal RNA small subunit methyltransferase NEP1 (EC 2.1.1.-) (18S rRNA (pseudouridine-N1-)-methyltransferase NEP1) (18S rRNA Psi1248 methyltransferase) (Nucleolar protein EMG1 homolog) (Protein C2f) (Ribosome biogenesis protein NEP1)	reviewed	244	4	0.936
FXR1	O14745	O14745	SLC9A3R1 NHERF NHERF1	Na(+)/H(+) exchange regulatory cofactor NHE-RF1 (NHERF-1) (Ezrin-radixin-moesin-binding phosphoprotein 50) (EBP50) (Regulatory cofactor of Na(+)/H(+) exchanger) (Sodium-hydrogen exchanger regulatory factor 1) (Solute carrier family 9 isoform A3 regulatory	reviewed	358	15	0.718
FXR1	Q96TA1	Q96TA1	FAM129B C9orf88	Niban-like protein 1 (Meg-3) (Melanoma invasion by ERK) (MINERVA) (Protein FAM129B)	reviewed	746	6	0.932
FXR1	Q9Y221-2	Q9Y221	NIP7 CGI-37 HSPC031 HSPC180 OK/SW-cl.76 OK/SW-cl.78	60S ribosome subunit biogenesis protein NIP7 homolog (KD93)	reviewed	180	5	0.944
FXR1	O75323-2	O75323	GBAS NIPSNAP2	Protein NipSnap homolog 2 (NipSnap2) (Glioblastoma-amplified sequence)	reviewed	286	2	0.826
FXR1	Q86X76-2	Q86X76	NIT1	Nitrilase homolog 1 (EC 3.5.-.-)	reviewed	327	2	0.85
FXR1	Q9NQR4	Q9NQR4	NIT2 CUA002	Omega-amidase NIT2 (EC 3.5.1.3) (Nitrilase homolog 2)	reviewed	276	3	0.884
FXR1	O15226	O15226	NKRF ITBA4 NRF	NF-kappa-B-repressing factor (NFkB-repressing factor) (Protein ITBA4) (Transcription factor NRF)	reviewed	690	3	0.9
FXR1	Q7RTR2	Q7RTR2	NLRC3 NOD3	Protein NLRC3 (CARD15-like protein) (Caterpiller protein 16.2) (CLR16.2) (Nucleotide-binding oligomerization domain protein 3)	reviewed	1065	3	0.926
FXR1	E1B6W5	P22307	SCP2	Non-specific lipid-transfer protein (NSL-TP) (EC 2.3.1.176) (Propanoyl-CoA C-acyltransferase) (SCP-chi) (SCPX) (Sterol carrier protein 2) (SCP-2) (Sterol carrier protein X) (SCP-X)	reviewed	547	2	0.854
FXR1	Q96D46	Q96D46	NMD3 CGI-07	60S ribosomal export protein NMD3 (hNMD3)	reviewed	503	5	0.928
FXR1	P30419	P30419	NMT1 NMT	Glycylpeptide N-tetradecanoyltransferase 1 (EC 2.3.1.97) (Myristoyl-CoA:protein N-myristoyltransferase 1) (NMT 1) (Type I N-myristoyltransferase) (Peptide N-myristoyltransferase 1)	reviewed	496	6	0.932
FXR1	Q13423	Q13423	NNT	NAD(P) transhydrogenase, mitochondrial (EC 1.6.1.2) (Nicotinamide nucleotide transhydrogenase) (Pyridine nucleotide transhydrogenase)	reviewed	1086	2	0.752
FXR1	Q9Y3T9	Q9Y3T9	NOC2L NIR	Nucleolar complex protein 2 homolog (Protein NOC2 homolog) (NOC2-like protein) (Novel INHAT repressor)	reviewed	749	2	0.838
FXR1	Q9BVI4	Q9BVI4	NOC4L	Nucleolar complex protein 4 homolog (NOC4 protein homolog) (NOC4-like protein) (Nucleolar complex-associated protein 4-like protein)	reviewed	516	2	0.872
FXR1	Q13823	Q13823	GNL2 NGP1	Nucleolar GTP-binding protein 2 (Autoantigen NGP-1)	reviewed	731	2	0.846
FXR1	Q9H8H0	Q9H8H0	NOL11 L14	Nucleolar protein 11	reviewed	719	6	0.954
FXR1	Q14978-3	Q14978	NOLC1 KIAA0035 NS5ATP13	Nucleolar and coiled-body phosphoprotein 1 (140 kDa nucleolar phosphoprotein) (Nopp140) (Hepatitis C virus NS5A-transactivated protein 13) (HCV NS5A-transactivated protein 13) (Nucleolar 130 kDa protein) (Nucleolar phosphoprotein p130)	reviewed	699	6	0.936
FXR1	Q5JPE7-2	Q5JPE7	NOMO2	Nodal modulator 2 (pM5 protein 2)	reviewed	1267	3	0.846
FXR1	Q9Y3C1	Q9Y3C1	NOP16 CGI-117 HSPC111	Nucleolar protein 16 (HBV pre-S2 trans-regulated protein 3)	reviewed	178	6	0.98
FXR1	P46087-4	P46087	NOP2 NOL1	Putative ribosomal RNA methyltransferase NOP2 (EC 2.1.1.-) (Nucleolar protein 1) (Nucleolar protein 2 homolog) (Proliferating-cell nucleolar antigen p120) (Proliferation-associated nucleolar protein p120)	reviewed	812	11	0.988
FXR1	O00567	O00567	NOP56 NOL5A	Nucleolar protein 56 (Nucleolar protein 5A)	reviewed	594	27	1
FXR1	Q9Y314	Q9Y314	NOSIP CGI-25	Nitric oxide synthase-interacting protein (eNOS-interacting protein)	reviewed	301	5	0.938
FXR1	Q8IUM7	Q8IUM7	NPAS4 BHLHE79 NXF PASD10	Neuronal PAS domain-containing protein 4 (Neuronal PAS4) (Class E basic helix-loop-helix protein 79) (bHLHe79) (HLH-PAS transcription factor NXF) (PAS domain-containing protein 10)	reviewed	802	2	0.834
FXR1	Q8TAT6	Q8TAT6	NPLOC4 KIAA1499 NPL4	Nuclear protein localization protein 4 homolog (Protein NPL4)	reviewed	608	5	0.954
FXR1	P15559-2	P15559	NQO1 DIA4 NMOR1	NAD(P)H dehydrogenase [quinone] 1 (EC 1.6.5.2) (Azoreductase) (DT-diaphorase) (DTD) (Menadione reductase) (NAD(P)H:quinone oxidoreductase 1) (Phylloquinone reductase) (Quinone reductase 1) (QR1)	reviewed	274	10	0.988
FXR1	Q9UHY1	Q9UHY1	NRBP1 BCON3 NRBP	Nuclear receptor-binding protein	reviewed	535	2	0.828
FXR1	Q15738	Q15738	NSDHL H105E3	Sterol-4-alpha-carboxylate 3-dehydrogenase, decarboxylating (EC 1.1.1.170) (Protein H105e3)	reviewed	373	4	0.924
FXR1	Q08J23-2	Q08J23	NSUN2 SAKI TRM4	tRNA (cytosine(34)-C(5))-methyltransferase (EC 2.1.1.203) (Myc-induced SUN domain-containing protein) (Misu) (NOL1/NOP2/Sun domain family member 2) (Substrate of AIM1/Aurora kinase B) (tRNA (cytosine-5-)-methyltransferase) (tRNA methyltransferase 4 homolo	reviewed	767	4	0.91
FXR1	Q96P11-4	Q96P11	NSUN5 WBSCR20 WBSCR20A	Putative methyltransferase NSUN5 (EC 2.1.1.-) (NOL1-related protein) (NOL1R) (NOL1/NOP2/Sun domain family member 5) (Williams-Beuren syndrome chromosomal region 20A protein)	reviewed	429	4	0.916
FXR1	Q5TFE4	Q5TFE4	NT5DC1 NT5C2L1 LP2642	5'-nucleotidase domain-containing protein 1 (EC 3.1.3.-)	reviewed	455	2	0.858
FXR1	Q9BV86	Q9BV86	NTMT1 C9orf32 METTL11A NRMT AD-003	N-terminal Xaa-Pro-Lys N-methyltransferase 1 (EC 2.1.1.244) (Alpha N-terminal protein methyltransferase 1A) (Methyltransferase-like protein 11A) (N-terminal RCC1 methyltransferase) (X-Pro-Lys N-terminal protein methyltransferase 1A) (NTM1A) [Cleaved into:	reviewed	223	2	0.886
FXR1	P57740	P57740	NUP107	Nuclear pore complex protein Nup107 (107 kDa nucleoporin) (Nucleoporin Nup107)	reviewed	925	4	0.91
FXR1	P49790	P49790	NUP153	Nuclear pore complex protein Nup153 (153 kDa nucleoporin) (Nucleoporin Nup153)	reviewed	1475	5	0.946
FXR1	O75694-2	O75694	NUP155 KIAA0791	Nuclear pore complex protein Nup155 (155 kDa nucleoporin) (Nucleoporin Nup155)	reviewed	1391	5	0.948
FXR1	Q92621	Q92621	NUP205 C7orf14 KIAA0225	Nuclear pore complex protein Nup205 (205 kDa nucleoporin) (Nucleoporin Nup205)	reviewed	2012	16	0.998
FXR1	Q9NV35	Q9NV35	NUDT15 MTH2	Probable 8-oxo-dGTP diphosphatase NUDT15 (8-oxo-dGTPase NUDT15) (EC 3.6.1.55) (7,8-dihydro-8-oxoguanine-triphosphatase NUDT15) (MutT homolog 2) (MTH2) (Nucleoside diphosphate-linked moiety X motif 15) (Nudix motif 15)	reviewed	164	2	0.854
FXR1	Q96RS6-3	Q96RS6	NUDCD1 CML66	NudC domain-containing protein 1 (Chronic myelogenous leukemia tumor antigen 66) (Tumor antigen CML66)	reviewed	583	3	0.908
FXR1	Q8WVJ2	Q8WVJ2	NUDCD2	NudC domain-containing protein 2	reviewed	157	2	0.838
FXR1	Q14980-3	Q14980	NUMA1 NUMA	Nuclear mitotic apparatus protein 1 (NuMA protein) (SP-H antigen)	reviewed	2115	18	0.998
FXR1	Q8NFH4	Q8NFH4	NUP37	Nucleoporin Nup37 (p37) (Nup107-160 subcomplex subunit Nup37)	reviewed	326	5	0.924
FXR1	P37198	P37198	NUP62	Nuclear pore glycoprotein p62 (62 kDa nucleoporin) (Nucleoporin Nup62)	reviewed	522	2	0.874
FXR1	Q99567	Q99567	NUP88	Nuclear pore complex protein Nup88 (88 kDa nucleoporin) (Nucleoporin Nup88)	reviewed	741	2	0.826
FXR1	Q9NPJ8-3	Q9NPJ8	NXT2 BM-025 DC9	NTF2-related export protein 2 (Protein p15-2)	reviewed	142	2	0.86
FXR1	P21953	P21953	BCKDHB	2-oxoisovalerate dehydrogenase subunit beta, mitochondrial (EC 1.2.4.4) (Branched-chain alpha-keto acid dehydrogenase E1 component beta chain) (BCKDE1B) (BCKDH E1-beta)	reviewed	392	2	0.874
FXR1	P10515	P10515	DLAT DLTA	Dihydrolipoyllysine-residue acetyltransferase component of pyruvate dehydrogenase complex, mitochondrial (EC 2.3.1.12) (70 kDa mitochondrial autoantigen of primary biliary cirrhosis) (PBC) (Dihydrolipoamide acetyltransferase component of pyruvate dehydrog	reviewed	647	15	0.988
FXR1	Q9UBD5-3	Q9UBD5	ORC3 LATHEO ORC3L	Origin recognition complex subunit 3 (Origin recognition complex subunit Latheo)	reviewed	711	2	0.826
FXR1	O43913	O43913	ORC5 ORC5L	Origin recognition complex subunit 5	reviewed	435	2	0.836
FXR1	P22059	P22059	OSBP OSBP1	Oxysterol-binding protein 1	reviewed	807	8	0.968
FXR1	Q92882	Q92882	OSTF1	Osteoclast-stimulating factor 1	reviewed	214	4	0.924
FXR1	O95747	O95747	OXSR1 KIAA1101 OSR1	Serine/threonine-protein kinase OSR1 (EC 2.7.11.1) (Oxidative stress-responsive 1 protein)	reviewed	527	3	0.92
FXR1	P32322	P32322	PYCR1	Pyrroline-5-carboxylate reductase 1, mitochondrial (P5C reductase 1) (P5CR 1) (EC 1.5.1.2)	reviewed	319	12	0.988
FXR1	Q96C36	Q96C36	PYCR2	Pyrroline-5-carboxylate reductase 2 (P5C reductase 2) (P5CR 2) (EC 1.5.1.2)	reviewed	320	8	0.976
FXR1	Q53H96	Q53H96	PYCRL	Pyrroline-5-carboxylate reductase 3 (P5C reductase 3) (P5CR 3) (EC 1.5.1.2) (Pyrroline-5-carboxylate reductase-like protein)	reviewed	274	5	0.936
FXR1	Q8WXI9	Q8WXI9	GATAD2B KIAA1150	Transcriptional repressor p66-beta (GATA zinc finger domain-containing protein 2B) (p66/p68)	reviewed	593	8	0.956
FXR1	P27986	P27986	PIK3R1 GRB1	Phosphatidylinositol 3-kinase regulatory subunit alpha (PI3-kinase regulatory subunit alpha) (PI3K regulatory subunit alpha) (PtdIns-3-kinase regulatory subunit alpha) (Phosphatidylinositol 3-kinase 85 kDa regulatory subunit alpha) (PI3-kinase subunit p85	reviewed	724	2	0.836
FXR1	P68402	P68402	PAFAH1B2 PAFAHB	Platelet-activating factor acetylhydrolase IB subunit beta (EC 3.1.1.47) (PAF acetylhydrolase 30 kDa subunit) (PAF-AH 30 kDa subunit) (PAF-AH subunit beta) (PAFAH subunit beta)	reviewed	229	4	0.91
FXR1	Q15102	Q15102	PAFAH1B3 PAFAHG	Platelet-activating factor acetylhydrolase IB subunit gamma (EC 3.1.1.47) (PAF acetylhydrolase 29 kDa subunit) (PAF-AH 29 kDa subunit) (PAF-AH subunit gamma) (PAFAH subunit gamma)	reviewed	231	4	0.912
FXR1	Q9BRP4-2	Q9BRP4	PAAF1 WDR71	Proteasomal ATPase-associated factor 1 (Protein G-16) (WD repeat-containing protein 71)	reviewed	392	2	0.87
FXR1	P11940-2	P11940	PABPC1 PAB1 PABP1 PABPC2	Polyadenylate-binding protein 1 (PABP-1) (Poly(A)-binding protein 1)	reviewed	636	7	0.954
FXR1	Q13310-2	Q13310	PABPC4 APP1 PABP4	Polyadenylate-binding protein 4 (PABP-4) (Poly(A)-binding protein 4) (Activated-platelet protein 1) (APP-1) (Inducible poly(A)-binding protein) (iPABP)	reviewed	644	15	1
FXR1	Q9UNF0	Q9UNF0	PACSIN2	Protein kinase C and casein kinase substrate in neurons protein 2 (Syndapin-2) (Syndapin-II)	reviewed	486	2	0.858
FXR1	Q8NC51	Q8NC51	SERBP1 PAIRBP1 CGI-55	Plasminogen activator inhibitor 1 RNA-binding protein (PAI1 RNA-binding protein 1) (PAI-RBP1) (SERPINE1 mRNA-binding protein 1)	reviewed	408	12	0.992
FXR1	Q9NVE7	Q9NVE7	PANK4	Pantothenate kinase 4 (hPanK4) (EC 2.7.1.33) (Pantothenic acid kinase 4)	reviewed	773	2	0.83
FXR1	Q99497	Q99497	PARK7	Protein DJ-1 (EC 3.4.-.-) (Oncogene DJ1) (Parkinson disease protein 7)	reviewed	189	6	0.958
FXR1	Q9UKK3	Q9UKK3	PARP4 ADPRTL1 KIAA0177 PARPL	Poly [ADP-ribose] polymerase 4 (PARP-4) (EC 2.4.2.30) (193 kDa vault protein) (ADP-ribosyltransferase diphtheria toxin-like 4) (ARTD4) (PARP-related/IalphaI-related H5/proline-rich) (PH5P) (Vault poly(ADP-ribose) polymerase) (VPARP)	reviewed	1724	5	0.934
FXR1	Q8IXQ6-3	Q8IXQ6	PARP9 BAL BAL1	Poly [ADP-ribose] polymerase 9 (PARP-9) (EC 2.4.2.30) (ADP-ribosyltransferase diphtheria toxin-like 9) (ARTD9) (B aggressive lymphoma protein)	reviewed	854	2	0.834
FXR1	Q86TB9-4	Q86TB9	PATL1 OK/KNS-cl.5	Protein PAT1 homolog 1 (PAT1-like protein 1) (Protein PAT1 homolog b) (Pat1b) (hPat1b)	reviewed	770	2	0.856
FXR1	Q9BVG4	Q9BVG4	PBDC1 CXorf26	Protein PBDC1 (Polysaccharide biosynthesis domain-containing protein 1)	reviewed	233	2	0.85
FXR1	Q15366-4	Q15366	PCBP2	Poly(rC)-binding protein 2 (Alpha-CP2) (Heterogeneous nuclear ribonucleoprotein E2) (hnRNP E2)	reviewed	365	23	1
FXR1	Q15645	Q15645	TRIP13 PCH2	Pachytene checkpoint protein 2 homolog (Human papillomavirus type 16 E1 protein-binding protein) (16E1-BP) (HPV16 E1 protein-binding protein) (Thyroid hormone receptor interactor 13) (Thyroid receptor-interacting protein 13) (TR-interacting protein 13) (T	reviewed	432	2	0.854
FXR1	Q5JVF3-3	Q5JVF3	PCID2 HT004	PCI domain-containing protein 2 (CSN12-like protein)	reviewed	399	2	0.862
FXR1	Q8WW12	Q8WW12	PCNP	PEST proteolytic signal-containing nuclear protein (PCNP) (PEST-containing nuclear protein)	reviewed	178	2	0.85
FXR1	Q9UKZ9	Q9UKZ9	PCOLCE2 PCPE2 UNQ250/PRO287	Procollagen C-endopeptidase enhancer 2 (Procollagen COOH-terminal proteinase enhancer 2) (PCPE-2) (Procollagen C-proteinase enhancer 2)	reviewed	415	4	0.89
FXR1	F5H8B1	Q99447	PCYT2	Ethanolamine-phosphate cytidylyltransferase (EC 2.7.7.14) (CTP:phosphoethanolamine cytidylyltransferase) (Phosphorylethanolamine transferase)	reviewed	389	4	0.898
FXR1	Q9BUL8	Q9BUL8	PDCD10 CCM3 TFAR15	Programmed cell death protein 10 (Cerebral cavernous malformations 3 protein) (TF-1 cell apoptosis-related protein 15)	reviewed	212	4	0.948
FXR1	O75340	O75340	PDCD6 ALG2	Programmed cell death protein 6 (Apoptosis-linked gene 2 protein) (Probable calcium-binding protein ALG-2)	reviewed	191	3	0.874
FXR1	P07237	P07237	P4HB ERBA2L PDI PDIA1 PO4DB	Protein disulfide-isomerase (PDI) (EC 5.3.4.1) (Cellular thyroid hormone-binding protein) (Prolyl 4-hydroxylase subunit beta) (p55)	reviewed	508	23	0.814
FXR1	Q9Y2S7	Q9Y2S7	POLDIP2 PDIP38 POLD4 HSPC017	Polymerase delta-interacting protein 2 (38 kDa DNA polymerase delta interaction protein) (p38)	reviewed	368	4	0.934
FXR1	O00151	O00151	PDLIM1 CLIM1 CLP36	PDZ and LIM domain protein 1 (C-terminal LIM domain protein 1) (Elfin) (LIM domain protein CLP-36)	reviewed	329	18	0.746
FXR1	Q96JY6-3	Q96JY6	PDLIM2 PP6345	PDZ and LIM domain protein 2 (PDZ-LIM protein mystique)	reviewed	352	3	0.894
FXR1	Q96HC4	Q96HC4	PDLIM5 ENH L9	PDZ and LIM domain protein 5 (Enigma homolog) (Enigma-like PDZ and LIM domains protein)	reviewed	596	7	0.946
FXR1	O00764	O00764	PDXK C21orf124 C21orf97 PKH PNK PRED79	Pyridoxal kinase (EC 2.7.1.35) (Pyridoxine kinase)	reviewed	312	4	0.916
FXR1	Q13951	Q13951	CBFB	Core-binding factor subunit beta (CBF-beta) (Polyomavirus enhancer-binding protein 2 beta subunit) (PEA2-beta) (PEBP2-beta) (SL3-3 enhancer factor 1 subunit beta) (SL3/AKV core-binding factor beta subunit)	reviewed	182	3	0.914
FXR1	P30086	P30086	PEBP1 PBP PEBP	Phosphatidylethanolamine-binding protein 1 (PEBP-1) (HCNPpp) (Neuropolypeptide h3) (Prostatic-binding protein) (Raf kinase inhibitor protein) (RKIP) [Cleaved into: Hippocampal cholinergic neurostimulating peptide (HCNP)]	reviewed	187	7	0.988
FXR1	Q9BRX2	Q9BRX2	PELO CGI-17	Protein pelota homolog (EC 3.1.-.-)	reviewed	385	3	0.848
FXR1	O60437	O60437	PPL KIAA0568	Periplakin (190 kDa paraneoplastic pemphigus antigen) (195 kDa cornified envelope precursor protein)	reviewed	1756	25	1
FXR1	O00541-2	O00541	PES1	Pescadillo homolog	reviewed	588	15	0.998
FXR1	Q9UHV9	Q9UHV9	PFDN2 PFD2 HSPC231	Prefoldin subunit 2	reviewed	154	2	0.872
FXR1	P61758	P61758	VBP1 PFDN3	Prefoldin subunit 3 (HIBBJ46) (Von Hippel-Lindau-binding protein 1) (VBP-1) (VHL-binding protein 1)	reviewed	197	4	0.932
FXR1	Q9NQP4	Q9NQP4	PFDN4 PFD4	Prefoldin subunit 4 (Protein C-1)	reviewed	134	2	0.888
FXR1	Q99471	Q99471	PFDN5 MM1 PFD5	Prefoldin subunit 5 (C-Myc-binding protein Mm-1) (Myc modulator 1)	reviewed	154	2	0.874
FXR1	P18669	P18669	PGAM1 PGAMA CDABP0006	Phosphoglycerate mutase 1 (EC 3.1.3.13) (EC 5.4.2.11) (EC 5.4.2.4) (BPG-dependent PGAM 1) (Phosphoglycerate mutase isozyme B) (PGAM-B)	reviewed	254	9	0.978
FXR1	O00264	O00264	PGRMC1 HPR6.6 PGRMC	Membrane-associated progesterone receptor component 1 (mPR)	reviewed	195	3	0.894
FXR1	Q99623	Q99623	PHB2 BAP REA	Prohibitin-2 (B-cell receptor-associated protein BAP37) (D-prohibitin) (Repressor of estrogen receptor activity)	reviewed	299	34	1
FXR1	Q7RTV0	Q7RTV0	PHF5A	PHD finger-like domain-containing protein 5A (PHD finger-like domain protein 5A) (Splicing factor 3B-associated 14 kDa protein) (SF3b14b)	reviewed	110	2	0.894
FXR1	Q9Y3A3-3	Q9Y3A3	MOB4 MOB3 MOBKL3 PHOCN PREI3 CGI-95	MOB-like protein phocein (2C4D) (Class II mMOB1) (Mob1 homolog 3) (Mob3) (Mps one binder kinase activator-like 3) (Preimplantation protein 3)	reviewed	225	2	0.842
FXR1	Q9NRX4	Q9NRX4	PHPT1 PHP14 CGI-202 HSPC141	14 kDa phosphohistidine phosphatase (EC 3.1.3.-) (Phosphohistidine phosphatase 1) (Protein janus-A homolog)	reviewed	125	2	0.882
FXR1	Q13492-3	Q13492	PICALM CALM	Phosphatidylinositol-binding clathrin assembly protein (Clathrin assembly lymphoid myeloid leukemia protein)	reviewed	652	15	1
FXR1	Q9H307	Q9H307	PNN DRS MEMA	Pinin (140 kDa nuclear and cell adhesion-related phosphoprotein) (Desmosome-associated protein) (Domain-rich serine protein) (DRS protein) (DRSP) (Melanoma metastasis clone A protein) (Nuclear protein SDK3) (SR-like protein)	reviewed	717	4	0.914
FXR1	O00625	O00625	PIR	Pirin (EC 1.13.11.24) (Probable quercetin 2,3-dioxygenase PIR) (Probable quercetinase)	reviewed	290	3	0.888
FXR1	Q9NWT1	Q9NWT1	PAK1IP1 PIP1 WDR84	p21-activated protein kinase-interacting protein 1 (PAK/PLC-interacting protein 1) (hPIP1) (PAK1-interacting protein 1) (WD repeat-containing protein 84)	reviewed	392	3	0.878
FXR1	Q16512-3	Q16512	PKN1 PAK1 PKN PRK1 PRKCL1	Serine/threonine-protein kinase N1 (EC 2.7.11.13) (Protease-activated kinase 1) (PAK-1) (Protein kinase C-like 1) (Protein kinase C-like PKN) (Protein kinase PKN-alpha) (Protein-kinase C-related kinase 1) (Serine-threonine protein kinase N)	reviewed	942	2	0.828
FXR1	Q16513-3	Q16513	PKN2 PRK2 PRKCL2	Serine/threonine-protein kinase N2 (EC 2.7.11.13) (PKN gamma) (Protein kinase C-like 2) (Protein-kinase C-related kinase 2)	reviewed	984	2	0.84
FXR1	Q99959	Q99959	PKP2	Plakophilin-2	reviewed	881	24	0.706
FXR1	Q9Y263	Q9Y263	PLAA PLAP	Phospholipase A-2-activating protein (PLA2P) (PLAP)	reviewed	795	4	0.926
FXR1	Q01970	Q01970	PLCB3	1-phosphatidylinositol 4,5-bisphosphate phosphodiesterase beta-3 (EC 3.1.4.11) (Phosphoinositide phospholipase C-beta-3) (Phospholipase C-beta-3) (PLC-beta-3)	reviewed	1234	5	0.958
FXR1	Q8N3E9	Q8N3E9	PLCD3 KIAA1964	1-phosphatidylinositol 4,5-bisphosphate phosphodiesterase delta-3 (EC 3.1.4.11) (Phosphoinositide phospholipase C-delta-3) (Phospholipase C-delta-3) (PLC-delta-3)	reviewed	789	5	0.93
FXR1	Q15149-4	Q15149	PLEC PLEC1	Plectin (PCN) (PLTN) (Hemidesmosomal protein 1) (HD1) (Plectin-1)	reviewed	4684	1017	0.748
FXR1	Q9NYT0	Q9NYT0	PLEK2	Pleckstrin-2	reviewed	353	2	0.852
FXR1	O43660-2	O43660	PLRG1	Pleiotropic regulator 1	reviewed	514	5	0.928
FXR1	P13797	P13797	PLS3	Plastin-3 (T-plastin)	reviewed	630	16	0.984
FXR1	Q9Y3B4	Q9Y3B4	SF3B14 CGI-110 HSPC175 HT006	Pre-mRNA branch site protein p14 (SF3b 14 kDa subunit)	reviewed	125	2	0.888
FXR1	O15305	O15305	PMM2	Phosphomannomutase 2 (PMM 2) (EC 5.4.2.8)	reviewed	246	4	0.91
FXR1	Q15126	Q15126	PMVK PMKI	Phosphomevalonate kinase (PMKase) (hPMK) (EC 2.7.4.2)	reviewed	192	3	0.91
FXR1	Q6XQN6	Q6XQN6	NAPRT1 FHIP	Nicotinate phosphoribosyltransferase (NAPRTase) (EC 6.3.4.21) (FHA-HIT-interacting protein) (Nicotinate phosphoribosyltransferase domain-containing protein 1)	reviewed	538	5	0.932
FXR1	Q9NRX1	Q9NRX1	PNO1	RNA-binding protein PNO1	reviewed	252	4	0.934
FXR1	P00491	P00491	PNP NP	Purine nucleoside phosphorylase (PNP) (EC 2.4.2.1) (Inosine phosphorylase) (Inosine-guanosine phosphorylase)	reviewed	289	6	0.936
FXR1	Q8TCS8	Q8TCS8	PNPT1 PNPASE	Polyribonucleotide nucleotidyltransferase 1, mitochondrial (EC 2.7.7.8) (3'-5' RNA exonuclease OLD35) (PNPase old-35) (Polynucleotide phosphorylase 1) (PNPase 1) (Polynucleotide phosphorylase-like protein)	reviewed	783	3	0.896
FXR1	Q99575	Q99575	POP1 KIAA0061	Ribonucleases P/MRP protein subunit POP1 (hPOP1) (EC 3.1.26.5)	reviewed	1024	2	0.798
FXR1	O75817	O75817	POP7 RPP20	Ribonuclease P protein subunit p20 (RNaseP protein p20) (EC 3.1.26.5) (Ribonucleases P/MRP protein subunit POP7 homolog) (hPOP7)	reviewed	140	2	0.848
FXR1	P0CG38	P0CG38	POTEI	POTE ankyrin domain family member I	reviewed	1075	81	1
FXR1	P62136	P62136	PPP1CA PPP1A	Serine/threonine-protein phosphatase PP1-alpha catalytic subunit (PP-1A) (EC 3.1.3.16)	reviewed	330	32	1
FXR1	P36873-2	P36873	PPP1CC	Serine/threonine-protein phosphatase PP1-gamma catalytic subunit (PP-1G) (EC 3.1.3.16) (Protein phosphatase 1C catalytic subunit)	reviewed	323	31	1
FXR1	P67775	P67775	PPP2CA	Serine/threonine-protein phosphatase 2A catalytic subunit alpha isoform (PP2A-alpha) (EC 3.1.3.16) (Replication protein C) (RP-C)	reviewed	309	9	0.986
FXR1	Q9P1A2	Q9P1A2	PPP4R1L C20orf192 PRO1085	Putative serine/threonine-protein phosphatase 4 regulatory subunit 1-like	reviewed	415	3	0.892
FXR1	Q5H9R7-5	Q5H9R7	PPP6R3 C11orf23 KIAA1558 PP6R3 SAPL SAPS3	Serine/threonine-protein phosphatase 6 regulatory subunit 3 (SAPS domain family member 3) (Sporulation-induced transcript 4-associated protein SAPL)	reviewed	873	5	0.932
FXR1	P48147	P48147	PREP PEP	Prolyl endopeptidase (PE) (EC 3.4.21.26) (Post-proline cleaving enzyme)	reviewed	710	8	0.956
FXR1	Q08752	Q08752	PPID CYP40 CYPD	Peptidyl-prolyl cis-trans isomerase D (PPIase D) (EC 5.2.1.8) (40 kDa peptidyl-prolyl cis-trans isomerase) (Cyclophilin-40) (CYP-40) (Cyclophilin-related protein) (Rotamase D)	reviewed	370	4	0.914
FXR1	P30405	P30405	PPIF CYP3	Peptidyl-prolyl cis-trans isomerase F, mitochondrial (PPIase F) (EC 5.2.1.8) (Cyclophilin D) (CyP-D) (CypD) (Cyclophilin F) (Mitochondrial cyclophilin) (CyP-M) (Rotamase F)	reviewed	207	2	0.84
FXR1	O43447	O43447	PPIH CYP20 CYPH	Peptidyl-prolyl cis-trans isomerase H (PPIase H) (EC 5.2.1.8) (Rotamase H) (Small nuclear ribonucleoprotein particle-specific cyclophilin H) (CypH) (U-snRNP-associated cyclophilin SnuCyp-20) (USA-CYP)	reviewed	177	5	0.966
FXR1	O15355	O15355	PPM1G PPM1C	Protein phosphatase 1G (EC 3.1.3.16) (Protein phosphatase 1C) (Protein phosphatase 2C isoform gamma) (PP2C-gamma) (Protein phosphatase magnesium-dependent 1 gamma)	reviewed	546	6	0.956
FXR1	Q9Y570-2	Q9Y570	PPME1 PME1 PP2593 PRO0750	Protein phosphatase methylesterase 1 (PME-1) (EC 3.1.1.89)	reviewed	386	3	0.886
FXR1	P53041	P53041	PPP5C PPP5	Serine/threonine-protein phosphatase 5 (PP5) (EC 3.1.3.16) (Protein phosphatase T) (PP-T) (PPT)	reviewed	499	3	0.906
FXR1	Q9UD71-2	Q9UD71	PPP1R1B DARPP32	Protein phosphatase 1 regulatory subunit 1B (DARPP-32) (Dopamine- and cAMP-regulated neuronal phosphoprotein)	reviewed	204	5	0.92
FXR1	O75400-3	O75400	PRPF40A FBP11 FLAF1 FNBP3 HIP10 HYPA HSPC225	Pre-mRNA-processing factor 40 homolog A (Fas ligand-associated factor 1) (Formin-binding protein 11) (Formin-binding protein 3) (Huntingtin yeast partner A) (Huntingtin-interacting protein 10) (HIP-10) (Huntingtin-interacting protein A) (Renal carcinoma a	reviewed	957	3	0.896
FXR1	Q9Y520-2	Q9Y520	PRRC2C BAT2D1 BAT2L2 KIAA1096 XTP2	Protein PRRC2C (BAT2 domain-containing protein 1) (HBV X-transactivated gene 2 protein) (HBV XAg-transactivated protein 2) (HLA-B-associated transcript 2-like 2) (Proline-rich and coiled-coil-containing protein 2C)	reviewed	2896	5	0.926
FXR1	P30044	P30044	PRDX5 ACR1 SBBI10	Peroxiredoxin-5, mitochondrial (EC 1.11.1.15) (Alu corepressor 1) (Antioxidant enzyme B166) (AOEB166) (Liver tissue 2D-page spot 71B) (PLP) (Peroxiredoxin V) (Prx-V) (Peroxisomal antioxidant enzyme) (TPx type VI) (Thioredoxin peroxidase PMP20) (Thioredoxi	reviewed	214	13	0.994
FXR1	P30041	P30041	PRDX6 AOP2 KIAA0106	Peroxiredoxin-6 (EC 1.11.1.15) (1-Cys peroxiredoxin) (1-Cys PRX) (24 kDa protein) (Acidic calcium-independent phospholipase A2) (aiPLA2) (EC 3.1.1.-) (Antioxidant protein 2) (Liver 2D page spot 40) (Non-selenium glutathione peroxidase) (NSGPx) (EC 1.11.1.	reviewed	224	11	0.992
FXR1	Q9HCU5	Q9HCU5	PREB SEC12	Prolactin regulatory element-binding protein (Mammalian guanine nucleotide exchange factor mSec12)	reviewed	417	2	0.874
FXR1	P49643	P49643	PRIM2 PRIM2A	DNA primase large subunit (EC 2.7.7.-) (DNA primase 58 kDa subunit) (p58)	reviewed	509	2	0.868
FXR1	P78527	P78527	PRKDC HYRC HYRC1	DNA-dependent protein kinase catalytic subunit (DNA-PK catalytic subunit) (DNA-PKcs) (EC 2.7.11.1) (DNPK1) (p460)	reviewed	4128	197	0.932
FXR1	O75569-3	O75569	PRKRA PACT RAX HSD-14 HSD14	Interferon-inducible double-stranded RNA-dependent protein kinase activator A (PKR-associated protein X) (PKR-associating protein X) (Protein activator of the interferon-induced protein kinase) (Protein kinase, interferon-inducible double-stranded RNA-dep	reviewed	313	4	0.918
FXR1	O43172	O43172	PRPF4 PRP4	U4/U6 small nuclear ribonucleoprotein Prp4 (PRP4 homolog) (hPrp4) (U4/U6 snRNP 60 kDa protein) (WD splicing factor Prp4)	reviewed	522	6	0.972
FXR1	O94906	O94906	PRPF6 C20orf14	Pre-mRNA-processing factor 6 (Androgen receptor N-terminal domain-transactivating protein 1) (ANT-1) (PRP6 homolog) (U5 snRNP-associated 102 kDa protein) (U5-102 kDa protein)	reviewed	941	10	0.978
FXR1	O43395	O43395	PRPF3 HPRP3 PRP3	U4/U6 small nuclear ribonucleoprotein Prp3 (Pre-mRNA-splicing factor 3) (hPrp3) (U4/U6 snRNP 90 kDa protein)	reviewed	683	2	0.87
FXR1	P62333	P62333	PSMC6 SUG2	26S protease regulatory subunit 10B (26S proteasome AAA-ATPase subunit RPT4) (Proteasome 26S subunit ATPase 6) (Proteasome subunit p42)	reviewed	389	9	0.966
FXR1	P62191	P62191	PSMC1	26S protease regulatory subunit 4 (P26s4) (26S proteasome AAA-ATPase subunit RPT2) (Proteasome 26S subunit ATPase 1)	reviewed	440	12	0.728
FXR1	P17980	P17980	PSMC3 TBP1	26S protease regulatory subunit 6A (26S proteasome AAA-ATPase subunit RPT5) (Proteasome 26S subunit ATPase 3) (Proteasome subunit P50) (Tat-binding protein 1) (TBP-1)	reviewed	439	11	0.988
FXR1	P43686	P43686	PSMC4 MIP224 TBP7	26S protease regulatory subunit 6B (26S proteasome AAA-ATPase subunit RPT3) (MB67-interacting protein) (MIP224) (Proteasome 26S subunit ATPase 4) (Tat-binding protein 7) (TBP-7)	reviewed	418	11	0.718
FXR1	P35998	P35998	PSMC2 MSS1	26S protease regulatory subunit 7 (26S proteasome AAA-ATPase subunit RPT1) (Proteasome 26S subunit ATPase 2) (Protein MSS1)	reviewed	433	17	0.92
FXR1	P62195	P62195	PSMC5 SUG1	26S protease regulatory subunit 8 (26S proteasome AAA-ATPase subunit RPT6) (Proteasome 26S subunit ATPase 5) (Proteasome subunit p45) (Thyroid hormone receptor-interacting protein 1) (TRIP1) (p45/SUG)	reviewed	406	12	0.978
FXR1	P25786	P25786	PSMA1 HC2 NU PROS30 PSC2	Proteasome subunit alpha type-1 (EC 3.4.25.1) (30 kDa prosomal protein) (PROS-30) (Macropain subunit C2) (Multicatalytic endopeptidase complex subunit C2) (Proteasome component C2) (Proteasome nu chain)	reviewed	263	12	0.994
FXR1	P25787	P25787	PSMA2 HC3 PSC3	Proteasome subunit alpha type-2 (EC 3.4.25.1) (Macropain subunit C3) (Multicatalytic endopeptidase complex subunit C3) (Proteasome component C3)	reviewed	234	3	0.86
FXR1	P25788	P25788	PSMA3 HC8 PSC8	Proteasome subunit alpha type-3 (EC 3.4.25.1) (Macropain subunit C8) (Multicatalytic endopeptidase complex subunit C8) (Proteasome component C8)	reviewed	255	6	0.96
FXR1	P25789	P25789	PSMA4 HC9 PSC9	Proteasome subunit alpha type-4 (EC 3.4.25.1) (Macropain subunit C9) (Multicatalytic endopeptidase complex subunit C9) (Proteasome component C9) (Proteasome subunit L)	reviewed	261	8	0.986
FXR1	P28066	P28066	PSMA5	Proteasome subunit alpha type-5 (EC 3.4.25.1) (Macropain zeta chain) (Multicatalytic endopeptidase complex zeta chain) (Proteasome zeta chain)	reviewed	241	12	0.772
FXR1	P60900	P60900	PSMA6 PROS27	Proteasome subunit alpha type-6 (EC 3.4.25.1) (27 kDa prosomal protein) (PROS-27) (p27K) (Macropain iota chain) (Multicatalytic endopeptidase complex iota chain) (Proteasome iota chain)	reviewed	246	10	0.992
FXR1	O14818	O14818	PSMA7 HSPC	Proteasome subunit alpha type-7 (EC 3.4.25.1) (Proteasome subunit RC6-1) (Proteasome subunit XAPC7)	reviewed	248	8	0.794
FXR1	P55786	P55786	NPEPPS PSA	Puromycin-sensitive aminopeptidase (PSA) (EC 3.4.11.14) (Cytosol alanyl aminopeptidase) (AAP-S)	reviewed	919	4	0.928
FXR1	P40306	P40306	PSMB10 LMP10 MECL1	Proteasome subunit beta type-10 (EC 3.4.25.1) (Low molecular mass protein 10) (Macropain subunit MECl-1) (Multicatalytic endopeptidase complex subunit MECl-1) (Proteasome MECl-1) (Proteasome subunit beta-2i)	reviewed	273	3	0.874
FXR1	P20618	P20618	PSMB1 PSC5	Proteasome subunit beta type-1 (EC 3.4.25.1) (Macropain subunit C5) (Multicatalytic endopeptidase complex subunit C5) (Proteasome component C5) (Proteasome gamma chain)	reviewed	241	5	0.956
FXR1	P49720	P49720	PSMB3	Proteasome subunit beta type-3 (EC 3.4.25.1) (Proteasome chain 13) (Proteasome component C10-II) (Proteasome theta chain)	reviewed	205	8	0.982
FXR1	P28074	P28074	PSMB5 LMPX MB1 X	Proteasome subunit beta type-5 (EC 3.4.25.1) (Macropain epsilon chain) (Multicatalytic endopeptidase complex epsilon chain) (Proteasome chain 6) (Proteasome epsilon chain) (Proteasome subunit MB1) (Proteasome subunit X)	reviewed	263	4	0.922
FXR1	O00231	O00231	PSMD11	26S proteasome non-ATPase regulatory subunit 11 (26S proteasome regulatory subunit RPN6) (26S proteasome regulatory subunit S9) (26S proteasome regulatory subunit p44.5)	reviewed	422	7	0.954
FXR1	O00232	O00232	PSMD12	26S proteasome non-ATPase regulatory subunit 12 (26S proteasome regulatory subunit RPN5) (26S proteasome regulatory subunit p55)	reviewed	456	8	0.95
FXR1	Q9UNM6	Q9UNM6	PSMD13	26S proteasome non-ATPase regulatory subunit 13 (26S proteasome regulatory subunit RPN9) (26S proteasome regulatory subunit S11) (26S proteasome regulatory subunit p40.5)	reviewed	376	8	0.958
FXR1	O00487	O00487	PSMD14 POH1	26S proteasome non-ATPase regulatory subunit 14 (EC 3.4.19.-) (26S proteasome regulatory subunit RPN11) (26S proteasome-associated PAD1 homolog 1)	reviewed	310	3	0.902
FXR1	Q99460	Q99460	PSMD1	26S proteasome non-ATPase regulatory subunit 1 (26S proteasome regulatory subunit RPN2) (26S proteasome regulatory subunit S1) (26S proteasome subunit p112)	reviewed	953	11	0.968
FXR1	Q13200	Q13200	PSMD2 TRAP2	26S proteasome non-ATPase regulatory subunit 2 (26S proteasome regulatory subunit RPN1) (26S proteasome regulatory subunit S2) (26S proteasome subunit p97) (Protein 55.11) (Tumor necrosis factor type 1 receptor-associated protein 2)	reviewed	908	25	0.998
FXR1	Q16401	Q16401	PSMD5 KIAA0072	26S proteasome non-ATPase regulatory subunit 5 (26S protease subunit S5 basic) (26S proteasome subunit S5B)	reviewed	504	5	0.94
FXR1	Q15008	Q15008	PSMD6 KIAA0107 PFAAP4	26S proteasome non-ATPase regulatory subunit 6 (26S proteasome regulatory subunit RPN7) (26S proteasome regulatory subunit S10) (Breast cancer-associated protein SGA-113M) (Phosphonoformate immuno-associated protein 4) (Proteasome regulatory particle subu	reviewed	389	9	0.978
FXR1	P51665	P51665	PSMD7 MOV34L	26S proteasome non-ATPase regulatory subunit 7 (26S proteasome regulatory subunit RPN8) (26S proteasome regulatory subunit S12) (Mov34 protein homolog) (Proteasome subunit p40)	reviewed	324	5	0.942
FXR1	P48556	P48556	PSMD8	26S proteasome non-ATPase regulatory subunit 8 (26S proteasome regulatory subunit RPN12) (26S proteasome regulatory subunit S14) (p31)	reviewed	350	3	0.886
FXR1	Q06323	Q06323	PSME1 IFI5111	Proteasome activator complex subunit 1 (11S regulator complex subunit alpha) (REG-alpha) (Activator of multicatalytic protease subunit 1) (Interferon gamma up-regulated I-5111 protein) (IGUP I-5111) (Proteasome activator 28 subunit alpha) (PA28a) (PA28alp	reviewed	249	5	0.934
FXR1	Q9UL46	Q9UL46	PSME2	Proteasome activator complex subunit 2 (11S regulator complex subunit beta) (REG-beta) (Activator of multicatalytic protease subunit 2) (Proteasome activator 28 subunit beta) (PA28b) (PA28beta)	reviewed	239	3	0.902
FXR1	P61289	P61289	PSME3	Proteasome activator complex subunit 3 (11S regulator complex subunit gamma) (REG-gamma) (Activator of multicatalytic protease subunit 3) (Ki nuclear autoantigen) (Proteasome activator 28 subunit gamma) (PA28g) (PA28gamma)	reviewed	254	16	0.994
FXR1	O95456	O95456	PSMG1 C21LRP DSCR2 PAC1	Proteasome assembly chaperone 1 (PAC-1) (Chromosome 21 leucine-rich protein) (C21-LRP) (Down syndrome critical region protein 2)	reviewed	288	2	0.852
FXR1	O95758-2	O95758	PTBP3 ROD1	Polypyrimidine tract-binding protein 3 (Regulator of differentiation 1) (Rod1)	reviewed	552	9	0.968
FXR1	Q96EY7	Q96EY7	PTCD3 MRPS39 TRG15	Pentatricopeptide repeat domain-containing protein 3, mitochondrial (28S ribosomal protein S39, mitochondrial) (MRP-S39) (Transformation-related gene 15 protein) (TRG-15)	reviewed	689	2	0.848
FXR1	Q8N8N7	Q8N8N7	PTGR2 ZADH1	Prostaglandin reductase 2 (PRG-2) (EC 1.3.1.48) (15-oxoprostaglandin 13-reductase) (Zinc-binding alcohol dehydrogenase domain-containing protein 1)	reviewed	351	2	0.862
FXR1	P18031	P18031	PTPN1 PTP1B	Tyrosine-protein phosphatase non-receptor type 1 (EC 3.1.3.48) (Protein-tyrosine phosphatase 1B) (PTP-1B)	reviewed	435	2	0.864
FXR1	Q8WUK0	Q8WUK0	PTPMT1 MOSP PLIP PNAS-129	Phosphatidylglycerophosphatase and protein-tyrosine phosphatase 1 (EC 3.1.3.27) (PTEN-like phosphatase) (Phosphoinositide lipid phosphatase) (Protein-tyrosine phosphatase mitochondrial 1) (EC 3.1.3.16) (EC 3.1.3.48)	reviewed	201	2	0.862
FXR1	Q9UHX1-3	Q9UHX1	PUF60 FIR ROBPI SIAHBP1	Poly(U)-binding-splicing factor PUF60 (60 kDa poly(U)-binding-splicing factor) (FUSE-binding protein-interacting repressor) (FBP-interacting repressor) (Ro-binding protein 1) (RoBP1) (Siah-binding protein 1) (Siah-BP1)	reviewed	559	9	0.976
FXR1	P22102	P22102	GART PGFT PRGS	Trifunctional purine biosynthetic protein adenosine-3 [Includes: Phosphoribosylamine--glycine ligase (EC 6.3.4.13) (Glycinamide ribonucleotide synthetase) (GARS) (Phosphoribosylglycinamide synthetase); Phosphoribosylformylglycinamidine cyclo-ligase (EC 6.	reviewed	1010	16	0.986
FXR1	P30566	P30566	ADSL AMPS	Adenylosuccinate lyase (ASL) (EC 4.3.2.2) (Adenylosuccinase) (ASase)	reviewed	484	8	0.978
FXR1	P31939	P31939	ATIC PURH OK/SW-cl.86	Bifunctional purine biosynthesis protein PURH [Includes: Phosphoribosylaminoimidazolecarboxamide formyltransferase (EC 2.1.2.3) (5-aminoimidazole-4-carboxamide ribonucleotide formyltransferase) (AICAR transformylase); IMP cyclohydrolase (EC 3.5.4.10) (ATI	reviewed	592	22	0.996
FXR1	P30520	P30520	ADSS ADSS2	Adenylosuccinate synthetase isozyme 2 (AMPSase 2) (AdSS 2) (EC 6.3.4.4) (Adenylosuccinate synthetase, acidic isozyme) (Adenylosuccinate synthetase, liver isozyme) (L-type adenylosuccinate synthetase) (IMP--aspartate ligase 2)	reviewed	456	4	0.886
FXR1	Q00577	Q00577	PURA PUR1	Transcriptional activator protein Pur-alpha (Purine-rich single-stranded DNA-binding protein alpha)	reviewed	322	5	0.918
FXR1	Q96QR8	Q96QR8	PURB	Transcriptional activator protein Pur-beta (Purine-rich element-binding protein B)	reviewed	312	7	0.966
FXR1	Q96PZ0	Q96PZ0	PUS7 KIAA1897	Pseudouridylate synthase 7 homolog (EC 5.4.99.-)	reviewed	661	2	0.824
FXR1	Q15269	Q15269	PWP2 PWP2H	Periodic tryptophan protein 2 homolog	reviewed	919	4	0.934
FXR1	P17812	P17812	CTPS1 CTPS	CTP synthase 1 (EC 6.3.4.2) (CTP synthetase 1) (UTP--ammonia ligase 1)	reviewed	591	7	0.958
FXR1	P31930	P31930	UQCRC1	Cytochrome b-c1 complex subunit 1, mitochondrial (Complex III subunit 1) (Core protein I) (Ubiquinol-cytochrome-c reductase complex core protein 1)	reviewed	480	9	0.958
FXR1	P22695	P22695	UQCRC2	Cytochrome b-c1 complex subunit 2, mitochondrial (Complex III subunit 2) (Core protein II) (Ubiquinol-cytochrome-c reductase complex core protein 2)	reviewed	453	7	0.952
FXR1	Q9UDW1	Q9UDW1	UQCR10 UCRC HSPC119	Cytochrome b-c1 complex subunit 9 (Complex III subunit 9) (Complex III subunit X) (Cytochrome c1 non-heme 7 kDa protein) (Ubiquinol-cytochrome c reductase complex 7.2 kDa protein)	reviewed	63	2	0.916
FXR1	Q08257	Q08257	CRYZ	Quinone oxidoreductase (EC 1.6.5.5) (NADPH:quinone reductase) (Zeta-crystallin)	reviewed	329	2	0.846
FXR1	P62820	P62820	RAB1A RAB1	Ras-related protein Rab-1A (YPT1-related protein)	reviewed	205	14	0.998
FXR1	Q9UL25	Q9UL25	RAB21 KIAA0118	Ras-related protein Rab-21	reviewed	225	6	0.956
FXR1	P61019	P61019	RAB2A RAB2	Ras-related protein Rab-2A	reviewed	212	6	0.966
FXR1	Q15286	Q15286	RAB35 RAB1C RAY	Ras-related protein Rab-35 (GTP-binding protein RAY) (Ras-related protein Rab-1C)	reviewed	201	10	0.998
FXR1	P20339	P20339	RAB5A RAB5	Ras-related protein Rab-5A	reviewed	215	4	0.944
FXR1	P51148	P51148	RAB5C RABL	Ras-related protein Rab-5C (L1880) (RAB5L)	reviewed	216	12	1
FXR1	F5H668	P20340	RAB6A RAB6	Ras-related protein Rab-6A (Rab-6)	reviewed	208	5	0.924
FXR1	P51149	P51149	RAB7A RAB7	Ras-related protein Rab-7a	reviewed	207	19	0.832
FXR1	P61006	P61006	RAB8A MEL RAB8	Ras-related protein Rab-8A (Oncogene c-mel)	reviewed	207	8	0.986
FXR1	Q5HYI8	Q5HYI8	RABL3	Rab-like protein 3	reviewed	236	2	0.876
FXR1	P63000	P63000	RAC1 TC25 MIG5	Ras-related C3 botulinum toxin substrate 1 (Cell migration-inducing gene 5 protein) (Ras-like protein TC25) (p21-Rac1)	reviewed	192	11	0.996
FXR1	Q92878-3	Q92878	RAD50	DNA repair protein RAD50 (hRAD50) (EC 3.6.-.-)	reviewed	1312	4	0.918
FXR1	P46060	P46060	RANGAP1 KIAA1835 SD	Ran GTPase-activating protein 1 (RanGAP1)	reviewed	587	3	0.896
FXR1	Q8NFJ5	Q8NFJ5	GPRC5A GPCR5A RAI3 RAIG1	Retinoic acid-induced protein 3 (G-protein coupled receptor family C group 5 member A) (Orphan G-protein-coupling receptor PEIG-1) (Retinoic acid-induced gene 1 protein) (RAIG-1)	reviewed	357	12	0.992
FXR1	P43487	P43487	RANBP1	Ran-specific GTPase-activating protein (Ran-binding protein 1) (RanBP1)	reviewed	201	8	0.994
FXR1	P61224-3	P61224	RAP1B OK/SW-cl.11	Ras-related protein Rap-1b (GTP-binding protein smg p21B)	reviewed	184	3	0.884
FXR1	Q8IXT5	Q8IXT5	RBM12B	RNA-binding protein 12B (RNA-binding motif protein 12B)	reviewed	1001	2	0.764
FXR1	Q15291	Q15291	RBBP5 RBQ3	Retinoblastoma-binding protein 5 (RBBP-5) (Retinoblastoma-binding protein RBQ-3)	reviewed	538	3	0.87
FXR1	Q16576	Q16576	RBBP7 RBAP46	Histone-binding protein RBBP7 (Histone acetyltransferase type B subunit 2) (Nucleosome-remodeling factor subunit RBAP46) (Retinoblastoma-binding protein 7) (RBBP-7) (Retinoblastoma-binding protein p46)	reviewed	425	10	0.978
FXR1	P98175-3	P98175	RBM10 DXS8237E GPATC9 GPATCH9 KIAA0122	RNA-binding protein 10 (G patch domain-containing protein 9) (RNA-binding motif protein 10) (RNA-binding protein S1-1) (S1-1)	reviewed	930	2	0.856
FXR1	Q9NTZ6	Q9NTZ6	RBM12 KIAA0765 HRIHFB2091	RNA-binding protein 12 (RNA-binding motif protein 12) (SH3/WW domain anchor protein in the nucleus) (SWAN)	reviewed	932	3	0.858
FXR1	P49756	P49756	RBM25 RNPC7	RNA-binding protein 25 (Arg/Glu/Asp-rich protein of 120 kDa) (RED120) (Protein S164) (RNA-binding motif protein 25) (RNA-binding region-containing protein 7)	reviewed	843	3	0.924
FXR1	Q5T8P6-3	Q5T8P6	RBM26 C13orf10 PRO1777	RNA-binding protein 26 (CTCL tumor antigen se70-2) (RNA-binding motif protein 26)	reviewed	1007	2	0.864
FXR1	Q14498-2	Q14498	RBM39 HCC1 RNPC2	RNA-binding protein 39 (Hepatocellular carcinoma protein 1) (RNA-binding motif protein 39) (RNA-binding region-containing protein 2) (Splicing factor HCC1)	reviewed	530	9	0.978
FXR1	P98179	P98179	RBM3 RNPL	Putative RNA-binding protein 3 (RNA-binding motif protein 3) (RNPL)	reviewed	157	2	0.864
FXR1	A0AV96	A0AV96	RBM47	RNA-binding protein 47 (RNA-binding motif protein 47)	reviewed	593	14	0.988
FXR1	Q9BWF3	Q9BWF3	RBM4 RBM4A	RNA-binding protein 4 (Lark homolog) (hLark) (RNA-binding motif protein 4) (RNA-binding motif protein 4a)	reviewed	364	5	0.922
FXR1	Q9Y5S9	Q9Y5S9	RBM8A RBM8 HSPC114 MDS014	RNA-binding protein 8A (Binder of OVCA1-1) (BOV-1) (RNA-binding motif protein 8A) (RNA-binding protein Y14) (Ribonucleoprotein RBM8A)	reviewed	174	4	0.944
FXR1	Q92804-2	Q92804	TAF15 RBP56 TAF2N	TATA-binding protein-associated factor 2N (68 kDa TATA-binding protein-associated factor) (TAF(II)68) (TAFII68) (RNA-binding protein 56)	reviewed	592	6	0.946
FXR1	P06400	P06400	RB1	Retinoblastoma-associated protein (p105-Rb) (pRb) (Rb) (pp110)	reviewed	928	5	0.952
FXR1	P18754	P18754	RCC1 CHC1	Regulator of chromosome condensation (Cell cycle regulatory protein) (Chromosome condensation protein 1)	reviewed	421	8	0.968
FXR1	Q9P258	Q9P258	RCC2 KIAA1470 TD60	Protein RCC2 (RCC1-like protein TD-60) (Telophase disk protein of 60 kDa)	reviewed	522	8	0.97
FXR1	Q8TC12	Q8TC12	RDH11 ARSDR1 PSDR1 CGI-82	Retinol dehydrogenase 11 (EC 1.1.1.300) (Androgen-regulated short-chain dehydrogenase/reductase 1) (HCV core-binding protein HCBP12) (Prostate short-chain dehydrogenase/reductase 1) (Retinal reductase 1) (RalR1)	reviewed	318	5	0.936
FXR1	P46063	P46063	RECQL RECQ1 RECQL1	ATP-dependent DNA helicase Q1 (EC 3.6.4.12) (DNA helicase, RecQ-like type 1) (RecQ1) (DNA-dependent ATPase Q1) (RecQ protein-like 1)	reviewed	649	5	0.92
FXR1	Q92900	Q92900	UPF1 KIAA0221 RENT1	Regulator of nonsense transcripts 1 (EC 3.6.4.-) (ATP-dependent helicase RENT1) (Nonsense mRNA reducing factor 1) (NORF1) (Up-frameshift suppressor 1 homolog) (hUpf1)	reviewed	1129	11	0.976
FXR1	P27694	P27694	RPA1 REPA1 RPA70	Replication protein A 70 kDa DNA-binding subunit (RP-A p70) (Replication factor A protein 1) (RF-A protein 1) (Single-stranded DNA-binding protein) [Cleaved into: Replication protein A 70 kDa DNA-binding subunit, N-terminally processed]	reviewed	616	4	0.922
FXR1	P35244	P35244	RPA3 REPA3 RPA14	Replication protein A 14 kDa subunit (RP-A p14) (Replication factor A protein 3) (RF-A protein 3)	reviewed	121	3	0.924
FXR1	P35250	P35250	RFC2	Replication factor C subunit 2 (Activator 1 40 kDa subunit) (A1 40 kDa subunit) (Activator 1 subunit 2) (Replication factor C 40 kDa subunit) (RF-C 40 kDa subunit) (RFC40)	reviewed	354	6	0.948
FXR1	P40938	P40938	RFC3	Replication factor C subunit 3 (Activator 1 38 kDa subunit) (A1 38 kDa subunit) (Activator 1 subunit 3) (Replication factor C 38 kDa subunit) (RF-C 38 kDa subunit) (RFC38)	reviewed	356	3	0.866
FXR1	P35249	P35249	RFC4	Replication factor C subunit 4 (Activator 1 37 kDa subunit) (A1 37 kDa subunit) (Activator 1 subunit 4) (Replication factor C 37 kDa subunit) (RF-C 37 kDa subunit) (RFC37)	reviewed	363	7	0.954
FXR1	P40937-2	P40937	RFC5	Replication factor C subunit 5 (Activator 1 36 kDa subunit) (A1 36 kDa subunit) (Activator 1 subunit 5) (Replication factor C 36 kDa subunit) (RF-C 36 kDa subunit) (RFC36)	reviewed	340	2	0.828
FXR1	Q6WKZ4-3	Q6WKZ4	RAB11FIP1 RCP	Rab11 family-interacting protein 1 (Rab11-FIP1) (Rab-coupling protein)	reviewed	1283	2	0.86
FXR1	Q15382	Q15382	RHEB RHEB2	GTP-binding protein Rheb (Ras homolog enriched in brain)	reviewed	184	2	0.822
FXR1	Q07960	Q07960	ARHGAP1 CDC42GAP RHOGAP1	Rho GTPase-activating protein 1 (CDC42 GTPase-activating protein) (GTPase-activating protein rhoOGAP) (Rho-related small GTPase protein activator) (Rho-type GTPase-activating protein 1) (p50-RhoGAP)	reviewed	439	3	0.848
FXR1	P61586	P61586	RHOA ARH12 ARHA RHO12	Transforming protein RhoA (Rho cDNA clone 12) (h12)	reviewed	193	11	0.996
FXR1	Q13671-2	Q13671	RIN1	Ras and Rab interactor 1 (Ras inhibitor JC99) (Ras interaction/interference protein 1)	reviewed	783	4	0.914
FXR1	P23921	P23921	RRM1 RR1	Ribonucleoside-diphosphate reductase large subunit (EC 1.17.4.1) (Ribonucleoside-diphosphate reductase subunit M1) (Ribonucleotide reductase large subunit)	reviewed	792	2	0.838
FXR1	P31350	P31350	RRM2 RR2	Ribonucleoside-diphosphate reductase subunit M2 (EC 1.17.4.1) (Ribonucleotide reductase small chain) (Ribonucleotide reductase small subunit)	reviewed	389	21	1
FXR1	O76021	O76021	RSL1D1 CATX11 CSIG PBK1 L12	Ribosomal L1 domain-containing protein 1 (CATX-11) (Cellular senescence-inhibited gene protein) (Protein PBK1)	reviewed	490	12	0.98
FXR1	Q96E39	Q96E39	RBMXL1	RNA binding motif protein, X-linked-like-1 (Heterogeneous nuclear ribonucleoprotein G-like 1)	reviewed	390	16	0.996
FXR1	Q8ND24	Q8ND24	RNF214	RING finger protein 214	reviewed	703	2	0.826
FXR1	O75116	O75116	ROCK2 KIAA0619	Rho-associated protein kinase 2 (EC 2.7.11.1) (Rho kinase 2) (Rho-associated, coiled-coil-containing protein kinase 2) (Rho-associated, coiled-coil-containing protein kinase II) (ROCK-II) (p164 ROCK-2)	reviewed	1388	17	0.994
FXR1	P19388	P19388	POLR2E	DNA-directed RNA polymerases I, II, and III subunit RPABC1 (RNA polymerases I, II, and III subunit ABC1) (DNA-directed RNA polymerase II 23 kDa polypeptide) (DNA-directed RNA polymerase II subunit E) (RPB5 homolog) (XAP4)	reviewed	210	3	0.894
FXR1	O15160	O15160	POLR1C POLR1E	DNA-directed RNA polymerases I and III subunit RPAC1 (DNA-directed RNA polymerase I subunit C) (RNA polymerases I and III subunit AC1) (AC40) (DNA-directed RNA polymerases I and III 40 kDa polypeptide) (RPA40) (RPA39) (RPC40)	reviewed	346	5	0.932
FXR1	Q9H7B2	Q9H7B2	RPF2 BXDC1	Ribosome production factor 2 homolog (Brix domain-containing protein 1) (Ribosome biogenesis protein RPF2 homolog)	reviewed	306	6	0.948
FXR1	Q9BUL9	Q9BUL9	RPP25	Ribonuclease P protein subunit p25 (RNase P protein subunit p25) (EC 3.1.26.5)	reviewed	199	2	0.876
FXR1	Q9NQG5	Q9NQG5	RPRD1B C20orf77 CREPT	Regulation of nuclear pre-mRNA domain-containing protein 1B (Cell cycle-related and expression-elevated protein in tumor)	reviewed	326	3	0.862
FXR1	P10301	P10301	RRAS	Ras-related protein R-Ras (p23)	reviewed	218	2	0.824
FXR1	Q5JTH9-3	Q5JTH9	RRP12 KIAA0690	RRP12-like protein	reviewed	1297	4	0.888
FXR1	P56182	P56182	RRP1 D21S2056E NNP1 NOP52 RRP1A	Ribosomal RNA processing protein 1 homolog A (Novel nuclear protein 1) (NNP-1) (Nucleolar protein Nop52) (RRP1-like protein)	reviewed	461	2	0.84
FXR1	Q9Y2L1	Q9Y2L1	DIS3 KIAA1008 RRP44	Exosome complex exonuclease RRP44 (EC 3.1.13.-) (EC 3.1.26.-) (Protein DIS3 homolog) (Ribosomal RNA-processing protein 44)	reviewed	958	4	0.942
FXR1	Q9Y3A4	Q9Y3A4	RRP7A CGI-96	Ribosomal RNA-processing protein 7 homolog A (Gastric cancer antigen Zg14)	reviewed	280	2	0.872
FXR1	P08865	P08865	RPSA LAMBR LAMR1	40S ribosomal protein SA (37 kDa laminin receptor precursor) (37LRP) (37/67 kDa laminin receptor) (LRP/LR) (67 kDa laminin receptor) (67LR) (Colon carcinoma laminin-binding protein) (Laminin receptor 1) (LamR) (Laminin-binding protein precursor p40) (LBP/	reviewed	295	18	1
FXR1	P51398-3	P51398	DAP3 MRPS29	28S ribosomal protein S29, mitochondrial (MRP-S29) (S29mt) (Death-associated protein 3) (DAP-3) (Ionizing radiation resistance conferring protein)	reviewed	398	4	0.936
FXR1	P09661	P09661	SNRPA1	U2 small nuclear ribonucleoprotein A' (U2 snRNP A')	reviewed	255	4	0.89
FXR1	P08579	P08579	SNRPB2	U2 small nuclear ribonucleoprotein B'' (U2 snRNP B'')	reviewed	225	3	0.874
FXR1	Q9Y265	Q9Y265	RUVBL1 INO80H NMP238 TIP49 TIP49A	RuvB-like 1 (EC 3.6.4.12) (49 kDa TATA box-binding protein-interacting protein) (49 kDa TBP-interacting protein) (54 kDa erythrocyte cytosolic protein) (ECP-54) (INO80 complex subunit H) (Nuclear matrix protein 238) (NMP 238) (Pontin 52) (TIP49a) (TIP60-a	reviewed	456	30	0.886
FXR1	P62304	P62304	SNRPE	Small nuclear ribonucleoprotein E (snRNP-E) (Sm protein E) (Sm-E) (SmE)	reviewed	92	6	0.774
FXR1	P21817-3	P21817	RYR1 RYDR	Ryanodine receptor 1 (RYR-1) (RyR1) (Skeletal muscle calcium release channel) (Skeletal muscle ryanodine receptor) (Skeletal muscle-type ryanodine receptor) (Type 1 ryanodine receptor)	reviewed	5038	8	0.974
FXR1	Q9Y6Y8-2	Q9Y6Y8	SEC23IP MSTP053	SEC23-interacting protein (p125)	reviewed	1000	2	0.852
FXR1	P61619	P61619	SEC61A1 SEC61A	Protein transport protein Sec61 subunit alpha isoform 1 (Sec61 alpha-1)	reviewed	476	6	0.932
FXR1	Q9UBE0	Q9UBE0	SAE1 AOS1 SUA1 UBLE1A	SUMO-activating enzyme subunit 1 (Ubiquitin-like 1-activating enzyme E1A) [Cleaved into: SUMO-activating enzyme subunit 1, N-terminally processed]	reviewed	346	5	0.926
FXR1	A0AV56	Q15424	SAFB HAP HET SAFB1	Scaffold attachment factor B1 (SAF-B) (SAF-B1) (HSP27 estrogen response element-TATA box-binding protein) (HSP27 ERE-TATA-binding protein)	reviewed	915	4	0.926
FXR1	Q9NR31	Q9NR31	SAR1A SAR1 SARA SARA1	GTP-binding protein SAR1a (COPII-associated small GTPase)	reviewed	198	2	0.902
FXR1	Q9BW04	Q9BW04	SARG C1orf116	Specifically androgen-regulated gene protein	reviewed	601	11	0.986
FXR1	Q15020	Q15020	SART3 KIAA0156 TIP110	Squamous cell carcinoma antigen recognized by T-cells 3 (SART-3) (hSART-3) (Tat-interacting protein of 110 kDa) (Tip110)	reviewed	963	3	0.908
FXR1	Q9Y3A5	Q9Y3A5	SBDS CGI-97	Ribosome maturation protein SBDS (Shwachman-Bodian-Diamond syndrome protein)	reviewed	250	8	0.988
FXR1	O75396	O75396	SEC22B SEC22L1	Vesicle-trafficking protein SEC22b (ER-Golgi SNARE of 24 kDa) (ERS-24) (ERS24) (SEC22 vesicle-trafficking protein homolog B) (SEC22 vesicle-trafficking protein-like 1)	reviewed	215	4	0.946
FXR1	Q15436	Q15436	SEC23A	Protein transport protein Sec23A (SEC23-related protein A)	reviewed	765	12	0.978
FXR1	O95486	O95486	SEC24A	Protein transport protein Sec24A (SEC24-related protein A)	reviewed	1093	6	0.968
FXR1	O95487-2	O95487	SEC24B	Protein transport protein Sec24B (SEC24-related protein B)	reviewed	1268	4	0.936
FXR1	P60468	P60468	SEC61B	Protein transport protein Sec61 subunit beta	reviewed	96	4	0.982
FXR1	Q9UI33-3	Q9UI33	SCN11A SCN12A SNS2	Sodium channel protein type 11 subunit alpha (Peripheral nerve sodium channel 5) (PN5) (Sensory neuron sodium channel 2) (Sodium channel protein type XI subunit alpha) (Voltage-gated sodium channel subunit alpha Nav1.9) (hNaN)	reviewed	1791	2	0.886
FXR1	P55809	P55809	OXCT1 OXCT SCOT	Succinyl-CoA:3-ketoacid coenzyme A transferase 1, mitochondrial (EC 2.8.3.5) (3-oxoacid CoA-transferase 1) (Somatic-type succinyl-CoA:3-oxoacid CoA-transferase) (SCOT-s)	reviewed	520	3	0.892
FXR1	Q9NVU7	Q9NVU7	SDAD1 NUC130	Protein SDA1 homolog (Nucleolar protein 130) (SDA1 domain-containing protein 1) (hSDA)	reviewed	687	2	0.85
FXR1	Q9H190	Q9H190	SDCBP2 SITAC18	Syntenin-2 (Syndecan-binding protein 2)	reviewed	292	2	0.85
FXR1	P55735-2	P55735	SEC13 D3S1231E SEC13L1 SEC13R	Protein SEC13 homolog (SEC13-like protein 1) (SEC13-related protein)	reviewed	322	5	0.926
FXR1	Q9UGP8	Q9UGP8	SEC63 SEC63L	Translocation protein SEC63 homolog	reviewed	760	2	0.846
FXR1	Q96EE3-1	Q96EE3	SEH1L SEC13L SEH1	Nucleoporin SEH1 (Nup107-160 subcomplex subunit SEH1) (SEC13-like protein)	reviewed	360	3	0.898
FXR1	Q15019	Q15019	SEPT2 DIFF6 KIAA0158 NEDD5	Septin-2 (Neural precursor cell expressed developmentally down-regulated protein 5) (NEDD-5)	reviewed	361	14	0.998
FXR1	Q9UHD8-3	Q9UHD8	SEPT9 KIAA0991 MSF	Septin-9 (MLL septin-like fusion protein MSF-A) (MLL septin-like fusion protein) (Ovarian/Breast septin) (Ov/Br septin) (Septin D1)	reviewed	586	3	0.89
FXR1	P50454	P50454	SERPINH1 CBP1 CBP2 HSP47 SERPINH2 PIG14	Serpin H1 (47 kDa heat shock protein) (Arsenic-transactivated protein 3) (AsTP3) (Cell proliferation-inducing gene 14 protein) (Collagen-binding protein) (Colligin) (Rheumatoid arthritis-related antigen RA-A47)	reviewed	418	5	0.916
FXR1	Q15637-3	Q15637	SF1 ZFM1 ZNF162	Splicing factor 1 (Mammalian branch point-binding protein) (BBP) (mBBP) (Transcription factor ZFM1) (Zinc finger gene in MEN1 locus) (Zinc finger protein 162)	reviewed	639	5	0.938
FXR1	Q15459	Q15459	SF3A1 SAP114	Splicing factor 3A subunit 1 (SF3a120) (Spliceosome-associated protein 114) (SAP 114)	reviewed	793	2	0.798
FXR1	Q12874	Q12874	SF3A3 SAP61	Splicing factor 3A subunit 3 (SF3a60) (Spliceosome-associated protein 61) (SAP 61)	reviewed	501	3	0.888
FXR1	Q13435	Q13435	SF3B2 SAP145	Splicing factor 3B subunit 2 (Pre-mRNA-splicing factor SF3b 145 kDa subunit) (SF3b145) (SF3b150) (Spliceosome-associated protein 145) (SAP 145)	reviewed	895	11	0.974
FXR1	Q15427	Q15427	SF3B4 SAP49	Splicing factor 3B subunit 4 (Pre-mRNA-splicing factor SF3b 49 kDa subunit) (SF3b50) (Spliceosome-associated protein 49) (SAP 49)	reviewed	424	2	0.82
FXR1	Q96B97-2	Q96B97	SH3KBP1 CIN85	SH3 domain-containing kinase-binding protein 1 (CD2-binding protein 3) (CD2BP3) (Cbl-interacting protein of 85 kDa) (Human Src family kinase-binding protein 1) (HSB-1)	reviewed	665	3	0.916
FXR1	Q9NR45	Q9NR45	NANS SAS	Sialic acid synthase (N-acetylneuraminate synthase) (EC 2.5.1.56) (N-acetylneuraminate-9-phosphate synthase) (EC 2.5.1.57) (N-acetylneuraminic acid phosphate synthase) (N-acetylneuraminic acid synthase)	reviewed	359	8	0.964
FXR1	Q9H2G2	Q9H2G2	SLK KIAA0204 STK2	STE20-like serine/threonine-protein kinase (STE20-like kinase) (hSLK) (EC 2.7.11.1) (CTCL tumor antigen se20-9) (STE20-related serine/threonine-protein kinase) (STE20-related kinase) (Serine/threonine-protein kinase 2)	reviewed	1235	6	0.972
FXR1	Q9NWH9	Q9NWH9	SLTM MET	SAFB-like transcription modulator (Modulator of estrogen-induced transcription)	reviewed	1034	4	0.938
FXR1	Q14683	Q14683	SMC1A DXS423E KIAA0178 SB1.8 SMC1 SMC1L1	Structural maintenance of chromosomes protein 1A (SMC protein 1A) (SMC-1-alpha) (SMC-1A) (Sb1.8)	reviewed	1233	14	0.992
FXR1	O95347	O95347	SMC2 CAPE SMC2L1 PRO0324	Structural maintenance of chromosomes protein 2 (SMC protein 2) (SMC-2) (Chromosome-associated protein E) (hCAP-E) (XCAP-E homolog)	reviewed	1197	5	0.938
FXR1	Q9UQE7	Q9UQE7	SMC3 BAM BMH CSPG6 SMC3L1	Structural maintenance of chromosomes protein 3 (SMC protein 3) (SMC-3) (Basement membrane-associated chondroitin proteoglycan) (Bamacan) (Chondroitin sulfate proteoglycan 6) (Chromosome-associated polypeptide) (hCAP)	reviewed	1217	17	0.984
FXR1	Q9NTJ3	Q9NTJ3	SMC4 CAPC SMC4L1	Structural maintenance of chromosomes protein 4 (SMC protein 4) (SMC-4) (Chromosome-associated polypeptide C) (hCAP-C) (XCAP-C homolog)	reviewed	1288	11	0.98
FXR1	O60264	O60264	SMARCA5 SNF2H WCRF135	SWI/SNF-related matrix-associated actin-dependent regulator of chromatin subfamily A member 5 (SWI/SNF-related matrix-associated actin-dependent regulator of chromatin A5) (EC 3.6.4.-) (Sucrose nonfermenting protein 2 homolog) (hSNF2H)	reviewed	1052	16	0.722
FXR1	Q96DI7	Q96DI7	SNRNP40 PRP8BP SFP38 WDR57	U5 small nuclear ribonucleoprotein 40 kDa protein (U5 snRNP 40 kDa protein) (U5-40K) (38 kDa-splicing factor) (Prp8-binding protein) (hPRP8BP) (U5 snRNP-specific 40 kDa protein) (WD repeat-containing protein 57)	reviewed	357	4	0.924
FXR1	P09012	P09012	SNRPA	U1 small nuclear ribonucleoprotein A (U1 snRNP A) (U1-A) (U1A)	reviewed	282	5	0.934
FXR1	O43290	O43290	SART1	U4/U6.U5 tri-snRNP-associated protein 1 (SNU66 homolog) (hSnu66) (Squamous cell carcinoma antigen recognized by T-cells 1) (SART-1) (hSART-1) (U4/U6.U5 tri-snRNP-associated 110 kDa protein) (allergen Hom s 1)	reviewed	800	2	0.808
FXR1	Q53GS9	Q53GS9	USP39 CGI-21 HSPC332 PRO2855	U4/U6.U5 tri-snRNP-associated protein 2 (Inactive ubiquitin-specific peptidase 39) (SAD1 homolog) (U4/U6.U5 tri-snRNP-associated 65 kDa protein) (65K)	reviewed	565	3	0.902
FXR1	Q13573	Q13573	SNW1 SKIIP SKIP	SNW domain-containing protein 1 (Nuclear protein SkiP) (Nuclear receptor coactivator NCoA-62) (Ski-interacting protein)	reviewed	536	2	0.868
FXR1	O60493	O60493	SNX3	Sorting nexin-3 (Protein SDP3)	reviewed	162	2	0.852
FXR1	Q9Y5X3	Q9Y5X3	SNX5	Sorting nexin-5	reviewed	404	3	0.896
FXR1	Q9Y5X1	Q9Y5X1	SNX9 SH3PX1 SH3PXD3A	Sorting nexin-9 (SH3 and PX domain-containing protein 1) (Protein SDP1) (SH3 and PX domain-containing protein 3A)	reviewed	595	3	0.916
FXR1	Q8IY81	Q8IY81	FTSJ3 SB92	pre-rRNA processing protein FTSJ3 (EC 2.1.1.-) (2'-O-ribose RNA methyltransferase SPB1 homolog) (Protein ftsJ homolog 3) (Putative rRNA methyltransferase 3)	reviewed	847	3	0.906
FXR1	P36952	P36952	SERPINB5 PI5	Serpin B5 (Maspin) (Peptidase inhibitor 5) (PI-5)	reviewed	375	7	0.956
FXR1	Q15005	Q15005	SPCS2 KIAA0102 SPC25	Signal peptidase complex subunit 2 (EC 3.4.-.-) (Microsomal signal peptidase 25 kDa subunit) (SPase 25 kDa subunit)	reviewed	226	2	0.858
FXR1	P61009	P61009	SPCS3 SPC22 UNQ1841/PRO3567	Signal peptidase complex subunit 3 (EC 3.4.-.-) (Microsomal signal peptidase 22/23 kDa subunit) (SPC22/23) (SPase 22/23 kDa subunit)	reviewed	180	2	0.86
FXR1	P19623	P19623	SRM SPS1 SRML1	Spermidine synthase (SPDSY) (EC 2.5.1.16) (Putrescine aminopropyltransferase)	reviewed	302	2	0.832
FXR1	P35270	P35270	SPR	Sepiapterin reductase (SPR) (EC 1.1.1.153)	reviewed	261	5	0.936
FXR1	P52788	P52788	SMS	Spermine synthase (SPMSY) (EC 2.5.1.22) (Spermidine aminopropyltransferase)	reviewed	366	8	0.976
FXR1	Q01082-2	Q01082	SPTBN1 SPTB2	Spectrin beta chain, non-erythrocytic 1 (Beta-II spectrin) (Fodrin beta chain) (Spectrin, non-erythroid beta chain 1)	reviewed	2364	3	0.902
FXR1	Q13813-2	Q13813	SPTAN1 NEAS SPTA2	Spectrin alpha chain, non-erythrocytic 1 (Alpha-II spectrin) (Fodrin alpha chain) (Spectrin, non-erythroid alpha subunit)	reviewed	2472	28	0.942
FXR1	Q13501-2	Q13501	SQSTM1 ORCA OSIL	Sequestosome-1 (EBI3-associated protein of 60 kDa) (EBIAP) (p60) (Phosphotyrosine-independent ligand for the Lck SH2 domain of 62 kDa) (Ubiquitin-binding protein p62)	reviewed	440	3	0.89
FXR1	O15042	O15042	U2SURP KIAA0332 SR140	U2 snRNP-associated SURP motif-containing protein (140 kDa Ser/Arg-rich domain protein) (U2-associated protein SR140)	reviewed	1029	7	0.97
FXR1	P12931	P12931	SRC SRC1	Proto-oncogene tyrosine-protein kinase Src (EC 2.7.10.2) (Proto-oncogene c-Src) (pp60c-src) (p60-Src)	reviewed	536	3	0.898
FXR1	P37108	P37108	SRP14	Signal recognition particle 14 kDa protein (SRP14) (18 kDa Alu RNA-binding protein)	reviewed	136	2	0.866
FXR1	P61011-2	P61011	SRP54	Signal recognition particle 54 kDa protein (SRP54)	reviewed	504	2	0.846
FXR1	Q9UHB9	Q9UHB9	SRP68	Signal recognition particle subunit SRP68 (SRP68) (Signal recognition particle 68 kDa protein)	reviewed	627	5	0.952
FXR1	O76094	O76094	SRP72	Signal recognition particle subunit SRP72 (SRP72) (Signal recognition particle 72 kDa protein)	reviewed	671	5	0.942
FXR1	Q9BXP5-2	Q9BXP5	SRRT ARS2 ASR2	Serrate RNA effector molecule homolog (Arsenite-resistance protein 2)	reviewed	876	10	0.976
FXR1	Q01130	Q01130	SRSF2 SFRS2	Serine/arginine-rich splicing factor 2 (Protein PR264) (Splicing component, 35 kDa) (Splicing factor SC35) (SC-35) (Splicing factor, arginine/serine-rich 2)	reviewed	221	6	0.97
FXR1	Q08170	Q08170	SRSF4 SFRS4 SRP75	Serine/arginine-rich splicing factor 4 (Pre-mRNA-splicing factor SRP75) (SRP001LB) (Splicing factor, arginine/serine-rich 4)	reviewed	494	3	0.886
FXR1	Q13243	Q13243	SRSF5 HRS SFRS5 SRP40	Serine/arginine-rich splicing factor 5 (Delayed-early protein HRS) (Pre-mRNA-splicing factor SRP40) (Splicing factor, arginine/serine-rich 5)	reviewed	272	4	0.924
FXR1	Q13242	Q13242	SRSF9 SFRS9 SRP30C	Serine/arginine-rich splicing factor 9 (Pre-mRNA-splicing factor SRp30C) (Splicing factor, arginine/serine-rich 9)	reviewed	221	3	0.92
FXR1	Q04837	Q04837	SSBP1 SSBP	Single-stranded DNA-binding protein, mitochondrial (Mt-SSB) (MtSSB) (PWP1-interacting protein 17)	reviewed	148	5	0.982
FXR1	Q8TE77	Q8TE77	SSH3 SSH3L	Protein phosphatase Slingshot homolog 3 (EC 3.1.3.16) (EC 3.1.3.48) (SSH-like protein 3) (SSH-3L) (hSSH-3L)	reviewed	659	4	0.93
FXR1	P51571	P51571	SSR4 TRAPD	Translocon-associated protein subunit delta (TRAP-delta) (Signal sequence receptor subunit delta) (SSR-delta)	reviewed	173	3	0.878
FXR1	Q08945	Q08945	SSRP1 FACT80	FACT complex subunit SSRP1 (Chromatin-specific transcription elongation factor 80 kDa subunit) (Facilitates chromatin transcription complex 80 kDa subunit) (FACT 80 kDa subunit) (FACTp80) (Facilitates chromatin transcription complex subunit SSRP1) (Recomb	reviewed	709	15	0.992
FXR1	Q8IZP2	Q8IZP2	ST13P4 FAM10A4	Putative protein FAM10A4 (Suppression of tumorigenicity 13 pseudogene 4)	reviewed	240	6	0.966
FXR1	P42224	P42224	STAT1	Signal transducer and activator of transcription 1-alpha/beta (Transcription factor ISGF-3 components p91/p84)	reviewed	750	7	0.954
FXR1	P40763-2	P40763	STAT3 APRF	Signal transducer and activator of transcription 3 (Acute-phase response factor)	reviewed	770	6	0.946
FXR1	P31948	P31948	STIP1	Stress-induced-phosphoprotein 1 (STI1) (Hsc70/Hsp90-organizing protein) (Hop) (Renal carcinoma antigen NY-REN-11) (Transformation-sensitive protein IEF SSP 3521)	reviewed	543	26	1
FXR1	Q9UEW8	Q9UEW8	STK39 SPAK	STE20/SPS1-related proline-alanine-rich protein kinase (Ste-20-related kinase) (EC 2.7.11.1) (DCHT) (Serine/threonine-protein kinase 39)	reviewed	545	3	0.908
FXR1	Q9UJZ1	Q9UJZ1	STOML2 SLP2 HSPC108	Stomatin-like protein 2, mitochondrial (SLP-2) (EPB72-like protein 2) (Paraprotein target 7) (Paratarg-7)	reviewed	356	11	0.988
FXR1	Q9Y3F4	Q9Y3F4	STRAP MAWD UNRIP	Serine-threonine kinase receptor-associated protein (MAP activator with WD repeats) (UNR-interacting protein) (WD-40 repeat protein PT-WD)	reviewed	350	15	1
FXR1	P46977	P46977	STT3A ITM1 TMC	Dolichyl-diphosphooligosaccharide--protein glycosyltransferase subunit STT3A (Oligosaccharyl transferase subunit STT3A) (STT3-A) (EC 2.4.99.18) (B5) (Integral membrane protein 1) (Transmembrane protein TMC)	reviewed	705	3	0.92
FXR1	Q8TCJ2	Q8TCJ2	STT3B SIMP	Dolichyl-diphosphooligosaccharide--protein glycosyltransferase subunit STT3B (Oligosaccharyl transferase subunit STT3B) (STT3-B) (EC 2.4.99.18) (Source of immunodominant MHC-associated peptides homolog)	reviewed	826	3	0.848
FXR1	P61764	P61764	STXBP1 UNC18A	Syntaxin-binding protein 1 (MUNC18-1) (N-Sec1) (Protein unc-18 homolog 1) (Unc18-1) (Protein unc-18 homolog A) (Unc-18A) (p67)	reviewed	594	2	0.834
FXR1	Q15833-2	Q15833	STXBP2 UNC18B	Syntaxin-binding protein 2 (Protein unc-18 homolog 2) (Unc18-2) (Protein unc-18 homolog B) (Unc-18B)	reviewed	593	7	0.95
FXR1	O00186	O00186	STXBP3	Syntaxin-binding protein 3 (Platelet Sec1 protein) (PSP) (Protein unc-18 homolog 3) (Unc18-3) (Protein unc-18 homolog C) (Unc-18C)	reviewed	592	4	0.91
FXR1	P53597	P53597	SUCLG1	Succinyl-CoA ligase [ADP/GDP-forming] subunit alpha, mitochondrial (EC 6.2.1.4) (EC 6.2.1.5) (Succinyl-CoA synthetase subunit alpha) (SCS-alpha)	reviewed	346	2	0.854
FXR1	Q96I99	Q96I99	SUCLG2	Succinyl-CoA ligase [GDP-forming] subunit beta, mitochondrial (EC 6.2.1.4) (GTP-specific succinyl-CoA synthetase subunit beta) (Succinyl-CoA synthetase beta-G chain) (SCS-betaG)	reviewed	432	2	0.856
FXR1	Q9Y2Z0	Q9Y2Z0	SUGT1	Suppressor of G2 allele of SKP1 homolog (Protein 40-6-3) (Sgt1)	reviewed	365	9	0.958
FXR1	Q5JTZ9	Q5JTZ9	AARS2 AARSL KIAA1270	Alanine--tRNA ligase, mitochondrial (EC 6.1.1.7) (Alanyl-tRNA synthetase) (AlaRS)	reviewed	985	2	0.802
FXR1	Q5T4T6-2	Q5T4T6	SYCP2L C6orf177 NO145	Synaptonemal complex protein 2-like (SCP-2-like) (145 kDa nucleolar protein homolog) (hsNO145)	reviewed	812	2	0.826
FXR1	Q6PI48	Q6PI48	DARS2	Aspartate--tRNA ligase, mitochondrial (EC 6.1.1.12) (Aspartyl-tRNA synthetase) (AspRS)	reviewed	645	4	0.924
FXR1	Q9Y285	Q9Y285	FARSA FARS FARSL FARSLA	Phenylalanine--tRNA ligase alpha subunit (EC 6.1.1.20) (CML33) (Phenylalanyl-tRNA synthetase alpha subunit) (PheRS)	reviewed	508	7	0.952
FXR1	Q9NSD9	Q9NSD9	FARSB FARSLB FRSB HSPC173	Phenylalanine--tRNA ligase beta subunit (EC 6.1.1.20) (Phenylalanyl-tRNA synthetase beta subunit) (PheRS)	reviewed	589	15	0.718
FXR1	P41250	P41250	GARS	Glycine--tRNA ligase (EC 6.1.1.14) (Diadenosine tetraphosphate synthetase) (AP-4-A synthetase) (Glycyl-tRNA synthetase) (GlyRS)	reviewed	739	16	0.706
FXR1	J3KNE5	P12081	HARS HRS	Histidine--tRNA ligase, cytoplasmic (EC 6.1.1.21) (Histidyl-tRNA synthetase) (HisRS)	reviewed	509	4	0.906
FXR1	P41252	P41252	IARS	Isoleucine--tRNA ligase, cytoplasmic (EC 6.1.1.5) (Isoleucyl-tRNA synthetase) (IRS) (IleRS)	reviewed	1262	32	0.928
FXR1	O43776	O43776	NARS	Asparagine--tRNA ligase, cytoplasmic (EC 6.1.1.22) (Asparaginyl-tRNA synthetase) (AsnRS)	reviewed	548	24	1
FXR1	Q8NF91-4	Q8NF91	SYNE1 C6orf98 KIAA0796 KIAA1262 KIAA1756 MYNE1	Nesprin-1 (Enaptin) (Myocyte nuclear envelope protein 1) (Myne-1) (Nuclear envelope spectrin repeat protein 1) (Synaptic nuclear envelope protein 1) (Syne-1)	reviewed	8797	2	0.856
FXR1	P54136	P54136	RARS	Arginine--tRNA ligase, cytoplasmic (EC 6.1.1.19) (Arginyl-tRNA synthetase) (ArgRS)	reviewed	660	28	0.996
FXR1	P49591	P49591	SARS SERS	Serine--tRNA ligase, cytoplasmic (EC 6.1.1.11) (Seryl-tRNA synthetase) (SerRS) (Seryl-tRNA(Ser/Sec) synthetase)	reviewed	514	10	0.978
FXR1	P26640	P26640	VARS G7A VARS2	Valine--tRNA ligase (EC 6.1.1.9) (Protein G7a) (Valyl-tRNA synthetase) (ValRS)	reviewed	1264	24	0.994
FXR1	P23381	P23381	WARS IFI53 WRS	Tryptophan--tRNA ligase, cytoplasmic (EC 6.1.1.2) (Interferon-induced protein 53) (IFP53) (Tryptophanyl-tRNA synthetase) (TrpRS) (hWRS) [Cleaved into: T1-TrpRS; T2-TrpRS]	reviewed	471	7	0.946
FXR1	P54577	P54577	YARS	Tyrosine--tRNA ligase, cytoplasmic (EC 6.1.1.1) (Tyrosyl-tRNA synthetase) (TyrRS) [Cleaved into: Tyrosine--tRNA ligase, cytoplasmic, N-terminally processed]	reviewed	528	13	0.99
FXR1	Q9Y2Z4	Q9Y2Z4	YARS2 CGI-04	Tyrosine--tRNA ligase, mitochondrial (EC 6.1.1.1) (Tyrosyl-tRNA synthetase) (TyrRS)	reviewed	477	2	0.846
FXR1	Q9H061	Q9H061	TMEM126A	Transmembrane protein 126A	reviewed	195	2	0.856
FXR1	Q9Y6A5	Q9Y6A5	TACC3 ERIC1	Transforming acidic coiled-coil-containing protein 3 (ERIC-1)	reviewed	838	2	0.852
FXR1	Q9UI15	Q9UI15	TAGLN3 NP25	Transgelin-3 (Neuronal protein 22) (NP22) (Neuronal protein NP25)	reviewed	199	2	0.87
FXR1	P37837	P37837	TALDO1 TAL TALDO TALDOR	Transaldolase (EC 2.2.1.2)	reviewed	337	5	0.946
FXR1	Q03519	Q03519	TAP2 ABCB3 PSF2 RING11 Y1	Antigen peptide transporter 2 (APT2) (ATP-binding cassette sub-family B member 3) (Peptide supply factor 2) (Peptide transporter PSF2) (PSF-2) (Peptide transporter TAP2) (Peptide transporter involved in antigen processing 2) (Really interesting new gene 1	reviewed	686	2	0.814
FXR1	Q8TC07-2	Q8TC07	TBC1D15	TBC1 domain family member 15 (GTPase-activating protein RAB7) (GAP for RAB7) (Rab7-GAP)	reviewed	691	2	0.84
FXR1	Q9BZK7	Q9BZK7	TBL1XR1 IRA1 TBLR1	F-box-like/WD repeat-containing protein TBL1XR1 (Nuclear receptor corepressor/HDAC3 complex subunit TBLR1) (TBL1-related protein 1) (Transducin beta-like 1X-related protein 1)	reviewed	514	5	0.904
FXR1	Q9Y4P3	Q9Y4P3	TBL2 WBSCR13 UNQ563/PRO1125	Transducin beta-like protein 2 (WS beta-transducin repeats protein) (WS-betaTRP) (Williams-Beuren syndrome chromosomal region 13 protein)	reviewed	447	4	0.898
FXR1	Q969Z0	Q969Z0	TBRG4 CPR2 FASTKD4 KIAA0948	Protein TBRG4 (Cell cycle progression restoration protein 2) (Cell cycle progression protein 2) (FAST kinase domain-containing protein 4) (Transforming growth factor beta regulator 4)	reviewed	631	3	0.892
FXR1	Q6JUT2	Q86XR7	TICAM2 TIRAP3 TIRP TRAM	TIR domain-containing adapter molecule 2 (TICAM-2) (Putative NF-kappa-B-activating protein 502) (TRIF-related adapter molecule) (Toll-like receptor adaptor protein 3) (Toll/interleukin-1 receptor domain-containing protein) (MyD88-4)	reviewed	235	2	0.866
FXR1	P23193	P23193	TCEA1 GTF2S TFIIS	Transcription elongation factor A protein 1 (Transcription elongation factor S-II protein 1) (Transcription elongation factor TFIIS.o)	reviewed	301	11	0.996
FXR1	P48643	P48643	CCT5 CCTE KIAA0098	T-complex protein 1 subunit epsilon (TCP-1-epsilon) (CCT-epsilon)	reviewed	541	36	1
FXR1	P49368	P49368	CCT3 CCTG TRIC5	T-complex protein 1 subunit gamma (TCP-1-gamma) (CCT-gamma) (hTRiC5)	reviewed	545	30	1
FXR1	Q99832-3	Q99832	CCT7 CCTH NIP7-1	T-complex protein 1 subunit eta (TCP-1-eta) (CCT-eta) (HIV-1 Nef-interacting protein)	reviewed	543	17	0.998
FXR1	P40227	P40227	CCT6A CCT6 CCTZ	T-complex protein 1 subunit zeta (TCP-1-zeta) (Acute morphine dependence-related protein 2) (CCT-zeta-1) (HTR3) (Tcp20)	reviewed	531	37	0.798
FXR1	Q15185	Q15185	PTGES3 P23 TEBP	Prostaglandin E synthase 3 (EC 5.3.99.3) (Cytosolic prostaglandin E2 synthase) (cPGES) (Hsp90 co-chaperone) (Progesterone receptor complex p23) (Telomerase-binding protein p23)	reviewed	160	9	0.994
FXR1	Q9NZ01	Q9NZ01	TECR GPSN2 SC2	Very-long-chain enoyl-CoA reductase (EC 1.3.1.93) (Synaptic glycoprotein SC2) (Trans-2,3-enoyl-CoA reductase) (TER)	reviewed	308	4	0.906
FXR1	Q8IZW8	Q8IZW8	TNS4 CTEN PP14434	Tensin-4 (C-terminal tensin-like protein)	reviewed	715	4	0.932
FXR1	P55072	P55072	VCP	Transitional endoplasmic reticulum ATPase (TER ATPase) (EC 3.6.4.6) (15S Mg(2+)-ATPase p97 subunit) (Valosin-containing protein) (VCP)	reviewed	806	34	0.938
FXR1	Q9NXF1	Q9NXF1	TEX10 L18 Nbla10363	Testis-expressed sequence 10 protein	reviewed	929	2	0.83
FXR1	Q9UKN8	Q9UKN8	GTF3C4	General transcription factor 3C polypeptide 4 (EC 2.3.1.48) (TF3C-delta) (Transcription factor IIIC 90 kDa subunit) (TFIIIC 90 kDa subunit) (TFIIIC90) (Transcription factor IIIC subunit delta)	reviewed	822	2	0.81
FXR1	P09110	P09110	ACAA1 ACAA PTHIO	3-ketoacyl-CoA thiolase, peroxisomal (EC 2.3.1.16) (Acetyl-CoA acyltransferase) (Beta-ketothiolase) (Peroxisomal 3-oxoacyl-CoA thiolase)	reviewed	424	10	0.966
FXR1	Q8NI27	Q8NI27	THOC2 CXorf3	THO complex subunit 2 (Tho2) (hTREX120)	reviewed	1593	3	0.874
FXR1	P00734	P00734	F2	Prothrombin (EC 3.4.21.5) (Coagulation factor II) [Cleaved into: Activation peptide fragment 1; Activation peptide fragment 2; Thrombin light chain; Thrombin heavy chain]	reviewed	622	2	0.822
FXR1	Q16762	Q16762	TST	Thiosulfate sulfurtransferase (EC 2.8.1.1) (Rhodanese)	reviewed	297	4	0.922
FXR1	Q9NXG2	Q9NXG2	THUMPD1	THUMP domain-containing protein 1	reviewed	353	2	0.86
FXR1	Q01085-2	Q01085	TIAL1	Nucleolysin TIAR (TIA-1-related protein)	reviewed	375	2	0.856
FXR1	Q9NQ88	Q9NQ88	TIGAR C12orf5	Fructose-2,6-bisphosphatase TIGAR (EC 3.1.3.46) (TP53-induced glycolysis and apoptosis regulator)	reviewed	270	3	0.87
FXR1	Q3ZCQ8-2	Q3ZCQ8	TIMM50 TIM50 PRO1512	Mitochondrial import inner membrane translocase subunit TIM50	reviewed	353	2	0.85
FXR1	Q8WZ42-11	Q8WZ42	TTN	Titin (EC 2.7.11.1) (Connectin) (Rhabdomyosarcoma antigen MU-RMS-40.14)	reviewed	34350	5	0.928
FXR1	P29401-2	P29401	TKT	Transketolase (TK) (EC 2.2.1.1)	reviewed	623	47	0.94
FXR1	Q9Y4G6	Q9Y4G6	TLN2 KIAA0320	Talin-2	reviewed	2542	9	0.986
FXR1	Q6NUQ4	Q6NUQ4	TMEM214 PP446	Transmembrane protein 214	reviewed	689	3	0.866
FXR1	P49755	P49755	TMED10 TMP21	Transmembrane emp24 domain-containing protein 10 (21 kDa transmembrane-trafficking protein) (S31III125) (S31I125) (Tmp-21-I) (Transmembrane protein Tmp21) (p23) (p24 family protein delta-1) (p24delta1) (p24delta)	reviewed	219	3	0.904
FXR1	P57088	P57088	TMEM33 DB83	Transmembrane protein 33 (Protein DB83)	reviewed	247	3	0.896
FXR1	Q92973	Q92973	TNPO1 KPNB2 MIP1 TRN	Transportin-1 (Importin beta-2) (Karyopherin beta-2) (M9 region interaction protein) (MIP)	reviewed	898	11	0.98
FXR1	O14787	O14787	TNPO2	Transportin-2 (Karyopherin beta-2b)	reviewed	897	2	0.788
FXR1	Q9Y5L0	Q9Y5L0	TNPO3 IPO12	Transportin-3 (Importin-12) (Imp12) (Transportin-SR) (TRN-SR)	reviewed	923	6	0.956
FXR1	Q15785	Q15785	TOMM34 URCC3	Mitochondrial import receptor subunit TOM34 (hTom34) (Translocase of outer membrane 34 kDa subunit)	reviewed	309	8	0.972
FXR1	O94826	O94826	TOMM70A KIAA0719 TOM70	Mitochondrial import receptor subunit TOM70 (Mitochondrial precursor proteins import receptor) (Translocase of outer membrane 70 kDa subunit)	reviewed	608	6	0.954
FXR1	P11388-4	P11388	TOP2A TOP2	DNA topoisomerase 2-alpha (EC 5.99.1.3) (DNA topoisomerase II, alpha isozyme)	reviewed	1531	49	1
FXR1	Q02880	Q02880	TOP2B	DNA topoisomerase 2-beta (EC 5.99.1.3) (DNA topoisomerase II, beta isozyme)	reviewed	1626	14	0.99
FXR1	Q96KB5	Q96KB5	PBK TOPK	Lymphokine-activated killer T-cell-originated protein kinase (EC 2.7.12.2) (Cancer/testis antigen 84) (CT84) (MAPKK-like protein kinase) (Nori-3) (PDZ-binding kinase) (Spermatogenesis-related protein kinase) (SPK) (T-LAK cell-originated protein kinase)	reviewed	322	4	0.914
FXR1	P0DI81	P0DI81	TRAPPC2 SEDL	Trafficking protein particle complex subunit 2 (Sedlin)	reviewed	140	2	0.866
FXR1	P09493-4	P09493	TPM1 C15orf13 TMSA	Tropomyosin alpha-1 chain (Alpha-tropomyosin) (Tropomyosin-1)	reviewed	284	23	1
FXR1	P06753-2	P06753	TPM3	Tropomyosin alpha-3 chain (Gamma-tropomyosin) (Tropomyosin-3) (Tropomyosin-5) (hTM5)	reviewed	285	33	1
FXR1	P12270	P12270	TPR	Nucleoprotein TPR (Megator) (NPC-associated intranuclear protein) (Translocated promoter region protein)	reviewed	2363	12	0.988
FXR1	Q9ULW0	Q9ULW0	TPX2 C20orf1 C20orf2 DIL2 HCA519	Targeting protein for Xklp2 (Differentially expressed in cancerous and non-cancerous lung cells 2) (DIL-2) (Hepatocellular carcinoma-associated antigen 519) (Protein fls353) (Restricted expression proliferation-associated protein 100) (p100)	reviewed	747	2	0.83
FXR1	P62995	P62995	TRA2B SFRS10	Transformer-2 protein homolog beta (TRA-2 beta) (TRA2-beta) (hTRA2-beta) (Splicing factor, arginine/serine-rich 10) (Transformer-2 protein homolog B)	reviewed	288	7	0.968
FXR1	Q14258	Q14258	TRIM25 EFP RNF147 ZNF147	E3 ubiquitin/ISG15 ligase TRIM25 (EC 6.3.2.19) (EC 6.3.2.n3) (Estrogen-responsive finger protein) (RING finger protein 147) (Tripartite motif-containing protein 25) (Ubiquitin/ISG15-conjugating enzyme TRIM25) (Zinc finger protein 147)	reviewed	630	19	0.844
FXR1	Q9BRZ2	Q9BRZ2	TRIM56 RNF109	E3 ubiquitin-protein ligase TRIM56 (EC 6.3.2.-) (RING finger protein 109) (Tripartite motif-containing protein 56)	reviewed	755	4	0.956
FXR1	Q15654	Q15654	TRIP6 OIP1	Thyroid receptor-interacting protein 6 (TR-interacting protein 6) (TRIP-6) (Opa-interacting protein 1) (OIP-1) (Zyxin-related protein 1) (ZRP-1)	reviewed	476	2	0.872
FXR1	Q14669-3	Q14669	TRIP12 KIAA0045 ULF	E3 ubiquitin-protein ligase TRIP12 (EC 6.3.2.-) (E3 ubiquitin-protein ligase for Arf) (ULF) (Thyroid receptor-interacting protein 12) (TR-interacting protein 12) (TRIP-12)	reviewed	1992	2	0.858
FXR1	Q99816	Q99816	TSG101	Tumor susceptibility gene 101 protein (ESCRT-I complex subunit TSG101)	reviewed	390	3	0.88
FXR1	P30536	P30536	TSPO BZRP MBR	Translocator protein (Mitochondrial benzodiazepine receptor) (PKBS) (Peripheral-type benzodiazepine receptor) (PBR)	reviewed	169	2	0.868
FXR1	Q2NL82	Q2NL82	TSR1 KIAA1401	Pre-rRNA-processing protein TSR1 homolog	reviewed	804	2	0.836
FXR1	Q12792-4	Q12792	TWF1 PTK9	Twinfilin-1 (Protein A6) (Protein tyrosine kinase 9)	reviewed	350	5	0.932
FXR1	Q9BRA2	Q9BRA2	TXNDC17 TXNL5	Thioredoxin domain-containing protein 17 (14 kDa thioredoxin-related protein) (TRP14) (Protein 42-9-9) (Thioredoxin-like protein 5)	reviewed	123	3	0.92
FXR1	P40222	P40222	TXLNA TXLN	Alpha-taxilin	reviewed	546	3	0.906
FXR1	Q8NBS9	Q8NBS9	TXNDC5 TLP46 UNQ364/PRO700	Thioredoxin domain-containing protein 5 (Endoplasmic reticulum resident protein 46) (ER protein 46) (ERp46) (Thioredoxin-like protein p46)	reviewed	432	5	0.936
FXR1	O43396	O43396	TXNL1 TRP32 TXL TXNL	Thioredoxin-like protein 1 (32 kDa thioredoxin-related protein)	reviewed	289	9	0.986
FXR1	P53007	P53007	SLC25A1 SLC20A3	Tricarboxylate transport protein, mitochondrial (Citrate transport protein) (CTP) (Solute carrier family 25 member 1) (Tricarboxylate carrier protein)	reviewed	311	3	0.888
FXR1	P26368-2	P26368	U2AF2 U2AF65	Splicing factor U2AF 65 kDa subunit (U2 auxiliary factor 65 kDa subunit) (hU2AF(65)) (hU2AF65) (U2 snRNP auxiliary factor large subunit)	reviewed	475	17	1
FXR1	O43818	O43818	RRP9 RNU3IP2 U355K	U3 small nucleolar RNA-interacting protein 2 (RRP9 homolog) (U3 small nucleolar ribonucleoprotein-associated 55 kDa protein) (U3 snoRNP-associated 55 kDa protein) (U3-55K)	reviewed	475	5	0.938
FXR1	Q15029	Q15029	EFTUD2 KIAA0031 SNRP116	116 kDa U5 small nuclear ribonucleoprotein component (Elongation factor Tu GTP-binding domain-containing protein 2) (SNU114 homolog) (hSNU114) (U5 snRNP-specific protein, 116 kDa) (U5-116 kDa)	reviewed	972	29	1
FXR1	Q3KQV9	Q3KQV9	UAP1L1	UDP-N-acetylhexosamine pyrophosphorylase-like protein 1 (EC 2.7.7.-)	reviewed	507	2	0.824
FXR1	P62837	P62837	UBE2D2 PUBC1 UBC4 UBC5B UBCH4 UBCH5B	Ubiquitin-conjugating enzyme E2 D2 (EC 6.3.2.19) (Ubiquitin carrier protein D2) (Ubiquitin-conjugating enzyme E2(17)KB 2) (Ubiquitin-conjugating enzyme E2-17 kDa 2) (Ubiquitin-protein ligase D2) (p53-regulated ubiquitin-conjugating enzyme 1)	reviewed	147	2	0.868
FXR1	P61077-3	P61077	UBE2D3 UBC5C UBCH5C	Ubiquitin-conjugating enzyme E2 D3 (EC 6.3.2.19) (Ubiquitin carrier protein D3) (Ubiquitin-conjugating enzyme E2(17)KB 3) (Ubiquitin-conjugating enzyme E2-17 kDa 3) (Ubiquitin-protein ligase D3)	reviewed	147	2	0.864
FXR1	P68036	P68036	UBE2L3 UBCE7 UBCH7	Ubiquitin-conjugating enzyme E2 L3 (EC 6.3.2.19) (L-UBC) (UbcH7) (Ubiquitin carrier protein L3) (Ubiquitin-conjugating enzyme E2-F1) (Ubiquitin-protein ligase L3)	reviewed	154	6	0.992
FXR1	Q5T6F2	Q5T6F2	UBAP2 KIAA1491	Ubiquitin-associated protein 2 (UBAP-2)	reviewed	1119	6	0.97
FXR1	P61081	P61081	UBE2M UBC12	NEDD8-conjugating enzyme Ubc12 (EC 6.3.2.-) (NEDD8 carrier protein) (NEDD8 protein ligase) (Ubiquitin-conjugating enzyme E2 M)	reviewed	183	9	0.99
FXR1	O00762	O00762	UBE2C UBCH10	Ubiquitin-conjugating enzyme E2 C (EC 6.3.2.19) (UbcH10) (Ubiquitin carrier protein C) (Ubiquitin-protein ligase C)	reviewed	179	4	0.924
FXR1	Q9NPD8	Q9NPD8	UBE2T HSPC150 PIG50	Ubiquitin-conjugating enzyme E2 T (EC 6.3.2.19) (Cell proliferation-inducing gene 50 protein) (Ubiquitin carrier protein T) (Ubiquitin-protein ligase T)	reviewed	197	2	0.86
FXR1	Q9H832	Q9H832	UBE2Z HOYS7	Ubiquitin-conjugating enzyme E2 Z (EC 6.3.2.19) (Uba6-specific E2 conjugating enzyme 1) (Use1) (Ubiquitin carrier protein Z) (Ubiquitin-protein ligase Z)	reviewed	354	2	0.842
FXR1	Q14139	Q14139	UBE4A KIAA0126	Ubiquitin conjugation factor E4 A	reviewed	1066	5	0.952
FXR1	P17480-2	P17480	UBTF UBF UBF1	Nucleolar transcription factor 1 (Autoantigen NOR-90) (Upstream-binding factor 1) (UBF-1)	reviewed	764	2	0.858
FXR1	Q14694-3	Q14694	USP10 KIAA0190	Ubiquitin carboxyl-terminal hydrolase 10 (EC 3.4.19.12) (Deubiquitinating enzyme 10) (Ubiquitin thioesterase 10) (Ubiquitin-specific-processing protease 10)	reviewed	798	4	0.9
FXR1	Q14157-1	Q14157	UBAP2L KIAA0144 NICE4	Ubiquitin-associated protein 2-like (Protein NICE-4)	reviewed	1087	17	0.998
FXR1	Q5T4S7-3	Q5T4S7	UBR4 KIAA0462 KIAA1307 RBAF600 ZUBR1	E3 ubiquitin-protein ligase UBR4 (EC 6.3.2.-) (600 kDa retinoblastoma protein-associated factor) (N-recognin-4) (Retinoblastoma-associated factor of 600 kDa) (RBAF600) (p600) (Zinc finger UBR1-type protein 1)	reviewed	5183	10	0.978
FXR1	P15374	P15374	UCHL3	Ubiquitin carboxyl-terminal hydrolase isozyme L3 (UCH-L3) (EC 3.4.19.12) (Ubiquitin thioesterase L3)	reviewed	230	3	0.868
FXR1	P22309	P22309	UGT1A1 GNT1 UGT1	UDP-glucuronosyltransferase 1-1 (UDPGT 1-1) (UGT1*1) (UGT1-01) (UGT1.1) (EC 2.4.1.17) (Bilirubin-specific UDPGT isozyme 1) (hUG-BR1) (UDP-glucuronosyltransferase 1-A) (UGT-1A) (UGT1A) (UDP-glucuronosyltransferase 1A1)	reviewed	533	2	0.82
FXR1	P19224	P19224	UGT1A6 GNT1 UGT1	UDP-glucuronosyltransferase 1-6 (UDPGT 1-6) (UGT1*6) (UGT1-06) (UGT1.6) (EC 2.4.1.17) (Phenol-metabolizing UDP-glucuronosyltransferase) (UDP-glucuronosyltransferase 1-F) (UGT-1F) (UGT1F) (UDP-glucuronosyltransferase 1A6)	reviewed	532	3	0.9
FXR1	Q92890	Q92890	UFD1L	Ubiquitin fusion degradation protein 1 homolog (UB fusion protein 1)	reviewed	307	7	0.972
FXR1	O94874	O94874	UFL1 KIAA0776 NLBP	E3 UFM1-protein ligase 1 (EC 6.3.2.-) (LZAP-binding protein)	reviewed	794	10	0.974
FXR1	Q9NUQ7	Q9NUQ7	UFSP2 C4orf20	Ufm1-specific protease 2 (UfSP2) (EC 3.4.22.-)	reviewed	469	2	0.86
FXR1	Q16851-2	Q16851	UGP2 UGP1	UTP--glucose-1-phosphate uridylyltransferase (EC 2.7.7.9) (UDP-glucose pyrophosphorylase) (UDPGP) (UGPase)	reviewed	508	9	0.98
FXR1	Q96T88	Q96T88	UHRF1 ICBP90 NP95 RNF106	E3 ubiquitin-protein ligase UHRF1 (EC 6.3.2.-) (Inverted CCAAT box-binding protein of 90 kDa) (Nuclear protein 95) (Nuclear zinc finger protein Np95) (HuNp95) (hNp95) (RING finger protein 106) (Transcription factor ICBP90) (Ubiquitin-like PHD and RING fin	reviewed	793	3	0.898
FXR1	P11172	P11172	UMPS OK/SW-cl.21	Uridine 5'-monophosphate synthase (UMP synthase) [Includes: Orotate phosphoribosyltransferase (OPRT) (OPRTase) (EC 2.4.2.10); Orotidine 5'-phosphate decarboxylase (ODC) (EC 4.1.1.23) (OMPdecase)]	reviewed	480	5	0.93
FXR1	Q9H3U1	Q9H3U1	UNC45A SMAP1	Protein unc-45 homolog A (Unc-45A) (GCUNC-45) (Smooth muscle cell-associated protein 1) (SMAP-1)	reviewed	944	10	0.97
FXR1	Q93008	Q93008	USP9X DFFRX FAM USP9	Probable ubiquitin carboxyl-terminal hydrolase FAF-X (EC 3.4.19.12) (Deubiquitinating enzyme FAF-X) (Fat facets in mammals) (hFAM) (Fat facets protein-related, X-linked) (Ubiquitin thioesterase FAF-X) (Ubiquitin-specific protease 9, X chromosome) (Ubiquit	reviewed	2570	9	0.99
FXR1	Q9BVJ6	Q9BVJ6	UTP14A SDCCAG16	U3 small nucleolar RNA-associated protein 14 homolog A (Antigen NY-CO-16) (Serologically defined colon cancer antigen 16)	reviewed	771	2	0.834
FXR1	Q9Y5J1	Q9Y5J1	UTP18 WDR50 CDABP0061 CGI-48	U3 small nucleolar RNA-associated protein 18 homolog (WD repeat-containing protein 50)	reviewed	556	4	0.948
FXR1	O75691	O75691	UTP20 DRIM	Small subunit processome component 20 homolog (Down-regulated in metastasis protein) (Novel nucleolar protein 73) (NNP73) (Protein Key-1A6)	reviewed	2785	5	0.858
FXR1	Q9NYH9	Q9NYH9	UTP6 C17orf40 HCA66 MHAT	U3 small nucleolar RNA-associated protein 6 homolog (Hepatocellular carcinoma-associated antigen 66) (Multiple hat domains protein)	reviewed	597	2	0.844
FXR1	Q9BV40	Q9BV40	VAMP8	Vesicle-associated membrane protein 8 (VAMP-8) (Endobrevin) (EDB)	reviewed	100	2	0.894
FXR1	Q9P0L0	Q9P0L0	VAPA VAP33	Vesicle-associated membrane protein-associated protein A (VAMP-A) (VAMP-associated protein A) (VAP-A) (33 kDa VAMP-associated protein) (VAP-33)	reviewed	249	7	0.708
FXR1	P50552	P50552	VASP	Vasodilator-stimulated phosphoprotein (VASP)	reviewed	380	16	0.956
FXR1	P21283	P21283	ATP6V1C1 ATP6C ATP6D VATC	V-type proton ATPase subunit C 1 (V-ATPase subunit C 1) (Vacuolar proton pump subunit C 1)	reviewed	382	5	0.926
FXR1	P36543-2	P36543	ATP6V1E1 ATP6E ATP6E2	V-type proton ATPase subunit E 1 (V-ATPase subunit E 1) (V-ATPase 31 kDa subunit) (p31) (Vacuolar proton pump subunit E 1)	reviewed	226	2	0.84
FXR1	O75348	O75348	ATP6V1G1 ATP6G ATP6G1 ATP6J	V-type proton ATPase subunit G 1 (V-ATPase subunit G 1) (V-ATPase 13 kDa subunit 1) (Vacuolar proton pump subunit G 1) (Vacuolar proton pump subunit M16)	reviewed	118	2	0.89
FXR1	Q9UI12-2	Q9UI12	ATP6V1H CGI-11	V-type proton ATPase subunit H (V-ATPase subunit H) (Nef-binding protein 1) (NBP1) (Protein VMA13 homolog) (V-ATPase 50/57 kDa subunits) (Vacuolar proton pump subunit H) (Vacuolar proton pump subunit SFD)	reviewed	483	2	0.852
FXR1	P52735-3	P52735	VAV2	Guanine nucleotide exchange factor VAV2 (VAV-2)	reviewed	878	2	0.858
FXR1	Q9Y277-2	Q9Y277	VDAC3	Voltage-dependent anion-selective channel protein 3 (VDAC-3) (hVDAC3) (Outer mitochondrial membrane protein porin 3)	reviewed	283	5	0.932
FXR1	Q00341	Q00341	HDLBP HBP VGL	Vigilin (High density lipoprotein-binding protein) (HDL-binding protein)	reviewed	1268	30	0.998
FXR1	O15195-2	O15195	VILL	Villin-like protein	reviewed	856	2	0.86
FXR1	P18206	P18206	VCL	Vinculin (Metavinculin) (MV)	reviewed	1134	41	0.888
FXR1	Q96RL7-3	Q96RL7	VPS13A CHAC KIAA0986	Vacuolar protein sorting-associated protein 13A (Chorea-acanthocytosis protein) (Chorein)	reviewed	3174	3	0.896
FXR1	O75436	O75436	VPS26A VPS26	Vacuolar protein sorting-associated protein 26A (Vesicle protein sorting 26A) (hVPS26)	reviewed	327	11	0.996
FXR1	Q4G0F5	Q4G0F5	VPS26B	Vacuolar protein sorting-associated protein 26B (Vesicle protein sorting 26B)	reviewed	336	4	0.918
FXR1	Q9BRG1	Q9BRG1	VPS25 DERP9 EAP20	Vacuolar protein-sorting-associated protein 25 (hVps25) (Dermal papilla-derived protein 9) (ELL-associated protein of 20 kDa) (ESCRT-II complex subunit VPS25)	reviewed	176	3	0.916
FXR1	Q96QK1	Q96QK1	VPS35 MEM3 TCCCTA00141	Vacuolar protein sorting-associated protein 35 (hVPS35) (Maternal-embryonic 3) (Vesicle protein sorting 35)	reviewed	796	20	0.992
FXR1	Q9UN37	Q9UN37	VPS4A VPS4	Vacuolar protein sorting-associated protein 4A (EC 3.6.4.6) (Protein SKD2) (VPS4-1) (hVPS4)	reviewed	437	2	0.828
FXR1	Q9UID3	Q9UID3	VPS51 ANG2 C11orf2 C11orf3 FFR PP5382	Vacuolar protein sorting-associated protein 51 homolog (Another new gene 2 protein) (Protein fat-free homolog)	reviewed	782	2	0.786
FXR1	Q99986	Q99986	VRK1	Serine/threonine-protein kinase VRK1 (EC 2.7.11.1) (Vaccinia-related kinase 1)	reviewed	396	2	0.87
FXR1	O75717	O75717	WDHD1 AND1	WD repeat and HMG-box DNA-binding protein 1 (Acidic nucleoplasmic DNA-binding protein 1) (And-1)	reviewed	1129	2	0.76
FXR1	Q9GZL7	Q9GZL7	WDR12	Ribosome biogenesis protein WDR12 (WD repeat-containing protein 12)	reviewed	423	5	0.95
FXR1	Q8NI36	Q8NI36	WDR36	WD repeat-containing protein 36 (T-cell activation WD repeat-containing protein) (TA-WDRP)	reviewed	951	3	0.916
FXR1	Q9UNX4	Q9UNX4	WDR3	WD repeat-containing protein 3	reviewed	943	4	0.944
FXR1	A8MX09	O94967	WDR47 KIAA0893	WD repeat-containing protein 47 (Neuronal enriched MAP interacting protein) (Nemitin)	reviewed	919	3	0.898
FXR1	P61964	P61964	WDR5 BIG3	WD repeat-containing protein 5 (BMP2-induced 3-kb gene protein)	reviewed	334	2	0.908
FXR1	Q9GZS3	Q9GZS3	WDR61	WD repeat-containing protein 61 (Meiotic recombination REC14 protein homolog) (SKI8 homolog) (Ski8)	reviewed	305	5	0.944
FXR1	Q6RFH5	Q6RFH5	WDR74 NSA1	WD repeat-containing protein 74 (NOP seven-associated protein 1)	reviewed	385	4	0.91
FXR1	Q9BRP8	Q9BRP8	WIBG PYM	Partner of Y14 and mago (Protein wibg homolog)	reviewed	204	2	0.85
FXR1	O14980	O14980	XPO1 CRM1	Exportin-1 (Exp1) (Chromosome region maintenance 1 protein homolog)	reviewed	1071	35	0.972
FXR1	P55060	P55060	CSE1L CAS XPO2	Exportin-2 (Exp2) (Cellular apoptosis susceptibility protein) (Chromosome segregation 1-like protein) (Importin-alpha re-exporter)	reviewed	971	48	1
FXR1	Q9HAV4	Q9HAV4	XPO5 KIAA1291 RANBP21	Exportin-5 (Exp5) (Ran-binding protein 21)	reviewed	1204	5	0.962
FXR1	Q9UIA9	Q9UIA9	XPO7 KIAA0745 RANBP16	Exportin-7 (Exp7) (Ran-binding protein 16)	reviewed	1087	7	0.976
FXR1	O43592	O43592	XPOT	Exportin-T (Exportin(tRNA)) (tRNA exportin)	reviewed	962	3	0.9
FXR1	Q9H0D6	Q9H0D6	XRN2	5'-3' exoribonuclease 2 (EC 3.1.13.-) (DHM1-like protein) (DHP protein)	reviewed	950	13	0.976
FXR1	O75695	O75695	RP2	Protein XRP2	reviewed	350	2	0.832
FXR1	P67809	P67809	YBX1 NSEP1 YB1	Nuclease-sensitive element-binding protein 1 (CCAAT-binding transcription factor I subunit A) (CBF-A) (DNA-binding protein B) (DBPB) (Enhancer factor I subunit A) (EFI-A) (Y-box transcription factor) (Y-box-binding protein 1) (YB-1)	reviewed	324	22	0.968
FXR1	P16989-3	P16989	YBX3 CSDA DBPA	Y-box-binding protein 3 (Cold shock domain-containing protein A) (DNA-binding protein A) (Single-strand DNA-binding protein NF-GMB)	reviewed	372	5	0.93
FXR1	O15498	O15498	YKT6	Synaptobrevin homolog YKT6 (EC 2.3.1.-)	reviewed	198	5	0.954
FXR1	Q9BYJ9	Q9BYJ9	YTHDF1 C20orf21	YTH domain family protein 1 (Dermatomyositis associated with cancer putative autoantigen 1) (DACA-1)	reviewed	559	5	0.926
FXR1	Q7Z739	Q7Z739	YTHDF3	YTH domain family protein 3	reviewed	585	12	0.982
FXR1	Q8WU90	Q8WU90	ZC3H15 DFRP1 LEREPO4 HSPC303 HT010 MSTP012 PP730	Zinc finger CCCH domain-containing protein 15 (DRG family-regulatory protein 1) (Likely ortholog of mouse immediate early response erythropoietin 4)	reviewed	426	4	0.918
FXR1	Q7Z2W4	Q7Z2W4	ZC3HAV1 ZC3HDC2 PRO1677	Zinc finger CCCH-type antiviral protein 1 (ADP-ribosyltransferase diphtheria toxin-like 13) (ARTD13) (Zinc finger CCCH domain-containing protein 2) (Zinc finger antiviral protein) (ZAP)	reviewed	902	6	0.962
FXR1	Q86UK7-2	Q86UK7	ZNF598	Zinc finger protein 598	reviewed	904	2	0.844
FXR1	Q9UDY2-7	Q9UDY2	TJP2 X104 ZO2	Tight junction protein ZO-2 (Tight junction protein 2) (Zona occludens protein 2) (Zonula occludens protein 2)	reviewed	1190	13	0.998
FXR1	O75312	O75312	ZNF259 ZPR1	Zinc finger protein ZPR1 (Zinc finger protein 259)	reviewed	459	6	0.938
FXR1	O43264	O43264	ZW10	Centromere/kinetochore protein zw10 homolog	reviewed	779	2	0.82
FXR1	B4DJ10	B4DJ10	LARS	Leucine--tRNA ligase, cytoplasmic (cDNA FLJ58533, highly similar to Leucyl-tRNA synthetase, cytoplasmic (EC 6.1.1.4))	unreviewed	1122	14	0.994
FXR1	Q96L35	Q96L35	EPHB4 hCG_20448	EPH receptor B4, isoform CRA_b (Ephrin type-B receptor 4) (Receptor protein tyrosine kinase variant EphB4v1)	unreviewed	935	2	0.874
FXR1	Q6ZS74	Q6ZS74	RALB hCG_17321	Ras-related protein Ral-B (V-ral simian leukemia viral oncogene homolog B (Ras related GTP binding protein), isoform CRA_b) (cDNA FLJ45773 fis, clone NETRP2003448, highly similar to Ras-related protein RAL-B)	unreviewed	227	2	0.848
FXR1	Q504U8	Q504U8	EGFR	EGFR protein (Epidermal growth factor receptor)	unreviewed	1091	4	0.918
FXR1	B4DQH4	B4DQH4	CCT8	T-complex protein 1 subunit theta (cDNA FLJ59382, highly similar to T-complex protein 1 subunit theta)	unreviewed	475	10	0.982
FXR1	B4DTG6	B4DTG6	LSM14A	Protein LSM14 homolog A (cDNA FLJ54754, highly similar to Protein FAM61A)	unreviewed	422	4	0.922
FXR1	B4DYP1	B4DYP1	DDAH1	N(G),N(G)-dimethylarginine dimethylaminohydrolase 1 (cDNA FLJ54119, highly similar to NG,NG-dimethylarginine dimethylaminohydrolase 1 (EC 3.5.3.18))	unreviewed	185	2	0.822
FXR1	Q5VV89	Q5VV89	MGST3	Microsomal glutathione S-transferase 3	unreviewed	166	2	0.854
FXR1	J3KNB1	J3KNB1	XIRP2	Xin actin-binding repeat-containing protein 2	unreviewed	3549	3	0.912
FXR1	J3KNF8	J3KNF8	CYB5B hCG_28205	Cytochrome b5 type B (Cytochrome b5 type B (Outer mitochondrial membrane), isoform CRA_a)	unreviewed	150	2	0.878
FXR1	Q5SRQ6	Q5SRQ6	CSNK2B hCG_43725	Casein kinase 2, beta polypeptide, isoform CRA_d (Casein kinase II subunit beta)	unreviewed	234	2	0.846
FXR1	J3KNL4	J3KNL4	ZNF185 hCG_39570	Zinc finger protein 185 (Zinc finger protein 185 (LIM domain), isoform CRA_d)	unreviewed	457	2	0.866
FXR1	B7Z815	B7Z815	USP7	Ubiquitin carboxyl-terminal hydrolase (EC 3.4.19.12)	unreviewed	1086	8	0.974
FXR1	B3KP96	B3KP96	TRIM16	Tripartite motif-containing protein 16 (cDNA FLJ31464 fis, clone NT2NE2001337, highly similar to Tripartite motif-containing protein 16)	unreviewed	434	4	0.92
FXR1	J3KPQ3	J3KPQ3	NR1I2 hCG_21777	Nuclear receptor subfamily 1 group I member 2 (Nuclear receptor subfamily 1, group I, member 2, isoform CRA_a)	unreviewed	434	2	0.854
FXR1	D3DQV9	D3DQV9	EIF4G2 hCG_1991788	Eukaryotic translation initiation factor 4 gamma 2 (Eukaryotic translation initiation factor 4 gamma, 2, isoform CRA_b) (Fragment)	unreviewed	907	8	0.964
FXR1	J3KPV7	J3KPV7	MPST hCG_41447	Sulfurtransferase	unreviewed	317	2	0.85
FXR1	Q5JR04	Q5JR04	MOV10 hCG_38463	Mov10, Moloney leukemia virus 10, homolog (Mouse), isoform CRA_a (Putative helicase MOV-10)	unreviewed	947	4	0.936
FXR1	Q6ZWP6	Q6ZWP6	ACAD8 hCG_37259	Acyl-Coenzyme A dehydrogenase family, member 8, isoform CRA_a (Isobutyryl-CoA dehydrogenase, mitochondrial) (cDNA FLJ90159 fis, clone HEMBB1002465, weakly similar to ACYL-COA DEHYDROGENASE (EC 1.3.99.-))	unreviewed	288	3	0.876
FXR1	Q9BTE9	Q9BTE9	NUMA1 hCG_2017131	NUMA1 protein (Nuclear mitotic apparatus protein 1) (Nuclear mitotic apparatus protein 1, isoform CRA_e)	unreviewed	979	5	0.916
FXR1	B7Z6G2	B7Z6G2	ARHGEF7	Rho guanine nucleotide exchange factor 7 (cDNA FLJ56152, highly similar to Rho guanine nucleotide exchange factor 7)	unreviewed	721	2	0.818
FXR1	B1AK88	B1AK88	CAPZB hCG_41078	Capping protein (Actin filament) muscle Z-line, beta, isoform CRA_d (F-actin-capping protein subunit beta)	unreviewed	301	11	0.992
FXR1	K7EMW4	K7EMW4	NCLN hCG_23630	Nicalin (Nicalin homolog (Zebrafish), isoform CRA_e)	unreviewed	489	5	0.938
FXR1	B4DYH1	B4DYH1	HSPH1 hCG_32198	Heat shock 105kDa/110kDa protein 1, isoform CRA_b (Heat shock protein 105 kDa) (cDNA FLJ52364, highly similar to Heat-shock protein 105 kDa)	unreviewed	860	2	0.844
FXR1	B4E1E9	B4E1E9	SLC25A10	Mitochondrial dicarboxylate carrier (cDNA FLJ61034, highly similar to Mitochondrial dicarboxylate carrier)	unreviewed	244	2	0.874
FXR1	B7ZAX5	B7ZAX5	GALK2	N-acetylgalactosamine kinase (cDNA, FLJ79339, highly similar to N-acetylgalactosamine kinase (EC 2.7.1.157))	unreviewed	434	2	0.85
FXR1	Q5SWX3	Q5SWX3	CAMK2G hCG_20541	Calcium/calmodulin-dependent protein kinase (CaM kinase) II gamma, isoform CRA_n (Calcium/calmodulin-dependent protein kinase type II subunit gamma)	unreviewed	516	2	0.878
FXR1	E9PF18	E9PF18	HADH	Hydroxyacyl-coenzyme A dehydrogenase, mitochondrial	unreviewed	318	4	0.894
FXR1	Q5T7C4	Q5T7C4	HMGB1	High mobility group protein B1	unreviewed	158	23	0.79
FXR1	G5EA06	G5EA06	MRPS27 hCG_37853	28S ribosomal protein S27, mitochondrial (Mitochondrial ribosomal protein S27, isoform CRA_b)	unreviewed	358	3	0.894
FXR1	B4DW73	B4DW73	PCK2	Phosphoenolpyruvate carboxykinase [GTP], mitochondrial (cDNA FLJ50710, highly similar to Phosphoenolpyruvate carboxykinase (GTP), mitochondrial (EC 4.1.1.32)) (cDNA, FLJ79105, highly similar to Phosphoenolpyruvate carboxykinase (GTP), mitochondrial (EC 4.	unreviewed	506	5	0.934
FXR1	A2ACR1	A2ACR1	PSMB9 hCG_17510	Proteasome subunit beta type (EC 3.4.25.1)	unreviewed	196	2	0.828
FXR1	Q96CG1	Q96CG1	ETF1 hCG_1981800	ETF1 protein (Eukaryotic peptide chain release factor subunit 1) (Eukaryotic translation termination factor 1) (Eukaryotic translation termination factor 1, isoform CRA_b)	unreviewed	404	9	0.978
FXR1	D6RGI3	D6RGI3	SEPT11 hCG_24410	Septin 11, isoform CRA_b (Septin-11)	unreviewed	425	4	0.92
FXR1	Q96Q25	Q96Q25	KM-PA-2	KM-PA-2 protein (Uncharacterized protein)	unreviewed	634	5	0.936
FXR1	B7ZL00	B7ZL00	SEC31A	Protein transport protein Sec31A (SEC31A protein)	unreviewed	1166	6	0.962
FXR1	Q8NBY1	Q8NBY1	MST4	Serine/threonine-protein kinase MST4 (cDNA FLJ90669 fis, clone PLACE1005519, moderately similar to Homo sapiens STE20-like kinase 3 (mst-3) mRNA)	unreviewed	392	3	0.896
FXR1	B4DUA9	B4DUA9	TRA2A	Transformer-2 protein homolog alpha (cDNA FLJ50682, highly similar to Transformer-2 protein homolog) (cDNA FLJ50689, highly similar to Transformer-2 protein homolog)	unreviewed	181	3	0.878
FXR1	B7Z452	B7Z452	ACSL1	Long-chain-fatty-acid--CoA ligase 1 (cDNA FLJ59311, highly similar to Long-chain-fatty-acid--CoA ligase 1 (EC 6.2.1.3))	unreviewed	698	6	0.952
FXR1	B4DHE8	B4DHE8	MSI2	RNA-binding protein Musashi homolog 2 (cDNA FLJ56904, highly similar to RNA-binding protein Musashi homolog 2)	unreviewed	324	2	0.846
FXR1	B7Z7M6	B7Z7M6	KIF2C	Kinesin-like protein KIF2C (cDNA FLJ53680, highly similar to Kinesin-like protein KIF2C)	unreviewed	612	2	0.854
FXR1	B4DU75	B4DU75	UTP15	U3 small nucleolar RNA-associated protein 15 homolog (cDNA FLJ61408, highly similar to U3 small nucleolar RNA-associated protein 15 homolog)	unreviewed	328	2	0.828
FXR1	B4DUT8	B4DUT8	CNN2	Calponin-2 (cDNA FLJ52765, highly similar to Calponin-2)	unreviewed	330	14	1
FXR1	G3XAA9	G3XAA9	RPS6KA4 hCG_23382	Ribosomal protein S6 kinase alpha-4 (Ribosomal protein S6 kinase, 90kDa, polypeptide 4, isoform CRA_c)	unreviewed	524	3	0.892
FXR1	B4DV00	B4DV00	PRMT5	Protein arginine N-methyltransferase 5 (cDNA FLJ54039, highly similar to Protein arginine N-methyltransferase 5 (EC 2.1.1.-))	unreviewed	531	6	0.938
FXR1	B8ZZ10	B8ZZ10	LUC7L LA16c-OS12.1-015	LUC7-like (S. cerevisiae) (Putative RNA-binding protein Luc7-like 1) (Fragment)	unreviewed	182	4	0.92
FXR1	D6R9B6	D6R9B6	RPS3A hCG_2026261	40S ribosomal protein S3a (Ribosomal protein S3A, isoform CRA_e)	unreviewed	145	2	0.84
FXR1	Q59FY4	Q59FY4	ACACA	Acetyl-CoA carboxylase 1 (Acetyl-Coenzyme A carboxylase alpha isoform 2 variant) (Fragment)	unreviewed	998	4	0.908
FXR1	B7Z9L0	B7Z9L0	CCT4	T-complex protein 1 subunit delta	unreviewed	483	6	0.954
FXR1	A6NKH4	A6NKH4	SNX1 hCG_33348	Sorting nexin 1, isoform CRA_d (Sorting nexin-1)	unreviewed	474	3	0.9
FXR1	E7EP32	E7EP32	GNB2	Guanine nucleotide-binding protein G(I)/G(S)/G(T) subunit beta-2	unreviewed	296	5	0.93
FXR1	G5E9W7	G5E9W7	MRPS22 hCG_17223	28S ribosomal protein S22, mitochondrial (Mitochondrial ribosomal protein S22, isoform CRA_e)	unreviewed	319	3	0.902
FXR1	E5KLK1	E5KLK1	OPA1 hCG_17270	Dynamin-like 120 kDa protein, mitochondrial (Mitochondrial dynamin-like 120 kDa protein) (Optic atrophy 1 (Autosomal dominant), isoform CRA_f)	unreviewed	961	2	0.866
FXR1	Q8TBP8	Q8TBP8	ALDH1L1 hCG_39268	ALDH1L1 protein (Aldehyde dehydrogenase 1 family, member L1, isoform CRA_a) (Cytosolic 10-formyltetrahydrofolate dehydrogenase)	unreviewed	505	2	0.832
FXR1	B4DT67	B4DT67	SPATS2L	SPATS2-like protein (cDNA FLJ59751, weakly similar to Mus musculus spermatogenesis associated, serine-rich 2 (Spats2), mRNA)	unreviewed	588	18	0.96
FXR1	Q32Q12	Q32Q12	NME1-NME2 NME2 hCG_2001850	Nucleoside diphosphate kinase (EC 2.7.4.6)	unreviewed	292	29	0.998
FXR1	E9PI39	E9PI39	EEF1D	Elongation factor 1-delta (Fragment)	unreviewed	204	3	0.85
FXR1	Q5U4A5	Q5U4A5	MAPK13 hCG_15774	MAPK13 protein (Mitogen-activated protein kinase 13) (Mitogen-activated protein kinase 13, isoform CRA_a)	unreviewed	257	4	0.908
FXR1	Q0VAN0	Q0VAN0	AKT2	AKT2 protein (RAC-beta serine/threonine-protein kinase)	unreviewed	438	3	0.88
FXR1	B4DFA2	B4DFA2	NSF	Vesicle-fusing ATPase (cDNA FLJ59316, highly similar to Vesicle-fusing ATPase (EC 3.6.4.6))	unreviewed	644	6	0.95
FXR1	D6W5Y5	D6W5Y5	CIRBP hCG_21575	Cold inducible RNA binding protein, isoform CRA_c (Cold-inducible RNA-binding protein)	unreviewed	297	2	0.864
FXR1	Q7Z6H8	Q7Z6H8	UGT1A10	UDP-glucuronosyltransferase 1-10 (UGT1A10 protein)	unreviewed	441	2	0.864
FXR1	Q4JM47	Q4JM47	AGR2	AGR2 (Anterior gradient protein 2 homolog)	unreviewed	195	17	0.91
FXR1	B7Z254	B7Z254	PDIA6	Protein disulfide-isomerase A6 (cDNA FLJ58502, highly similar to Protein disulfide-isomerase A6 (EC 5.3.4.1))	unreviewed	437	22	0.914
FXR1	B7Z972	B7Z972	PCMT1	Protein-L-isoaspartate O-methyltransferase (EC 2.1.1.77)	unreviewed	192	3	0.876
FXR1	Q96B58	Q96B58	TIA1 hCG_40580	Nucleolysin TIA-1 isoform p40 (TIA1 cytotoxic granule-associated RNA binding protein, isoform CRA_d) (TIA1 protein)	unreviewed	214	2	0.832
FXR1	Q68DB1	Q68DB1	DKFZp686F2281 MTA2	Metastasis-associated protein MTA2 (Putative uncharacterized protein DKFZp686F2281) (cDNA FLJ51637, highly similar to Metastasis-associated protein MTA2)	unreviewed	495	7	0.968
FXR1	B4DJ96	B4DJ96	LUC7L3	Luc7-like protein 3 (cDNA FLJ59548, highly similar to Cisplatin resistance-associated overexpressed protein)	unreviewed	356	4	0.91
FXR1	G5E9E7	G5E9E7	TJP1 hCG_27621	Tight junction protein 1 (Zona occludens 1), isoform CRA_e (Tight junction protein ZO-1)	unreviewed	1692	12	0.988
FXR1	C9JM19	C9JM19	RPS9 hCG_2009111	40S ribosomal protein S9 (Ribosomal protein S9, isoform CRA_e)	unreviewed	156	5	0.926
FXR1	A4D2Q0	A4D2Q0	UNC84A SUN1 tcag7.1079	SUN domain-containing protein 1 (Unc-84 homolog A (C. elegans))	unreviewed	974	5	0.948
FXR1	B4DVE7	B4DVE7	ANXA11	Annexin	unreviewed	472	2	0.842
FXR1	B7Z9L2	B7Z9L2	NDUFS2	NADH dehydrogenase [ubiquinone] iron-sulfur protein 2, mitochondrial (cDNA, FLJ78876, highly similar to NADH-ubiquinone oxidoreductase 49 kDa subunit, mitochondrial (EC 1.6.5.3))	unreviewed	231	2	0.86
FXR1	Q5T2B5	Q5T2B5	CUL2	Cullin-2	unreviewed	706	5	0.93
FXR1	B4DWT1	B4DWT1	SRSF11	Serine/arginine-rich-splicing factor 11 (cDNA FLJ52287, highly similar to Splicing factor arginine/serine-rich 11)	unreviewed	128	2	0.856
FXR1	B4DS61	B4DS61	SRPK1 hCG_15775	SFRS protein kinase 1, isoform CRA_f (SRSF protein kinase 1) (cDNA FLJ58405, highly similar to Serine/threonine-protein kinase SRPK1 (EC 2.7.11.1))	unreviewed	639	2	0.87
FXR1	D6RBD7	D6RBD7	EEF1E1 hCG_15559	Eukaryotic translation elongation factor 1 epsilon-1 (HCG15559, isoform CRA_d)	unreviewed	150	2	0.862
FXR1	Q8NBW7	Q8NBW7	KDELR1 hCG_2000376	ER lumen protein retaining receptor	unreviewed	150	3	0.906
FXR1	Q2TAM5	Q2TAM5	RELA	RELA protein (Transcription factor p65)	unreviewed	377	4	0.936
FXR1	B4E0R6	B4E0R6	IPO5	Importin-5 (cDNA FLJ54573, highly similar to Importin beta-3)	unreviewed	972	2	0.868
FXR1	A8MSH5	A8MSH5	RTFDC1	Protein RTF2 homolog	unreviewed	336	2	0.848
FXR1	B5MCX3	B5MCX3	41519	Septin-2	unreviewed	321	14	0.992
FXR1	A3KFL2	A3KFL2	EXOSC2	Exosome complex component RRP4	unreviewed	285	2	0.85
FXR1	H3BNZ1	H3BNZ1	PDXDC1	Pyridoxal-dependent decarboxylase domain-containing protein 1	unreviewed	761	4	0.912
FXR1	H7C2P7	H7C2P7	MRPL23	39S ribosomal protein L23, mitochondrial (Fragment)	unreviewed	118	2	0.868
FXR1	E9PRI4	E9PRI4	RPS6KA1	Ribosomal protein S6 kinase (EC 2.7.11.1)	unreviewed	719	5	0.932
FXR1	E9PJA7	E9PJA7	BCLAF1	Bcl-2-associated transcription factor 1	unreviewed	467	3	0.868
FXR1	E9PQD7	E9PQD7	RPS2	40S ribosomal protein S2	unreviewed	235	5	0.898
FXR1	J3KQU9	J3KQU9	AP1G1	AP-1 complex subunit gamma-1	unreviewed	825	11	0.708
FXR1	H0YNW5	H0YNW5	DUT	Deoxyuridine 5'-triphosphate nucleotidohydrolase, mitochondrial	unreviewed	167	4	0.892
FXR1	J3KTB5	J3KTB5	EIF4A1	Eukaryotic initiation factor 4A-I (Fragment)	unreviewed	257	7	0.954
FXR1	F5GXS7	F5GXS7	METAP1	Methionine aminopeptidase (EC 3.4.11.18)	unreviewed	336	2	0.89
FXR1	F5GYC4	F5GYC4	RPS6KA3	Ribosomal protein S6 kinase alpha-3	unreviewed	710	4	0.904
FXR1	E7ESI2	E7ESI2	CDK2	Cyclin-dependent kinase 2	unreviewed	238	4	0.91
FXR1	E9PFW3	E9PFW3	AP2M1	AP-2 complex subunit mu	unreviewed	460	3	0.902
FXR1	E9PKG1	E9PKG1	PRMT1	Protein arginine N-methyltransferase 1	unreviewed	325	13	0.986
FXR1	F8W0P7	F8W0P7	ATP5B	ATP synthase subunit beta, mitochondrial (Fragment)	unreviewed	270	2	0.876
FXR1	M0QYT0	M0QYT0		Uncharacterized protein (Fragment)	unreviewed	321	2	0.842
FXR1	K7ES59	K7ES59	PTBP1	Polypyrimidine tract-binding protein 1 (Fragment)	unreviewed	253	2	0.862
FXR1	J3KQE5	J3KQE5	RAN	GTP-binding nuclear protein Ran (Fragment)	unreviewed	234	2	0.854
FXR1	K7EIG1	K7EIG1	CLUH	Clustered mitochondria protein homolog	unreviewed	1242	9	0.958
FXR1	B9A067	B9A067	IMMT	Mitochondrial inner membrane protein	unreviewed	711	3	0.872
FXR1	H0YK83	H0YK83	SEC11A	Signal peptidase complex catalytic subunit SEC11A	unreviewed	185	4	0.916
FXR1	K4DIE0	K4DIE0	NUMA1	Nuclear mitotic apparatus protein 1 (Fragment)	unreviewed	353	3	0.882
FXR1	M0R0N4	M0R0N4	AP2S1	AP-2 complex subunit sigma	unreviewed	144	3	0.884
FXR1	E7ERJ7	E7ERJ7	PABPC1	Polyadenylate-binding protein 1	unreviewed	604	3	0.892
FXR1	Q5JY65	Q5JY65	CRNKL1	Crooked neck-like protein 1	unreviewed	836	2	0.848
FXR1	I3L0H8	I3L0H8	DDX19A	ATP-dependent RNA helicase DDX19A	unreviewed	447	4	0.93
FXR1	E7ETB3	E7ETB3	DNPEP	Aspartyl aminopeptidase	unreviewed	493	2	0.872
FXR1	J3QT46	J3QT46	HBS1L	HBS1-like protein	unreviewed	619	2	0.856
FXR1	F5H3Y3	F5H3Y3	LAMTOR1	Ragulator complex protein LAMTOR1	unreviewed	160	2	0.866
FXR1	Q5TCU3	Q5TCU3	TPM2	Tropomyosin beta chain	unreviewed	284	7	0.962
FXR1	K7ENP3	K7ENP3	ATP5A1	ATP synthase subunit alpha	unreviewed	531	2	0.884
FXR1	F5H7S3	F5H7S3	TPM1	Tropomyosin alpha-1 chain	unreviewed	245	5	0.936
FXR1	E9PII3	E9PII3	EPB41L2	Band 4.1-like protein 2	unreviewed	706	5	0.942
FXR1	E7ERS3	E7ERS3	ZC3H18	Zinc finger CCCH domain-containing protein 18	unreviewed	977	2	0.82
FXR1	C9IZQ1	C9IZQ1	SSR1	Translocon-associated protein subunit alpha	unreviewed	298	3	0.906
FXR1	G8JLD5	G8JLD5	DNM1L	Dynamin-1-like protein	unreviewed	712	5	0.928
FXR1	I3NI30	I3NI30	KRTAP9-2	Keratin-associated protein 9-2	unreviewed	158	7	0.956
FXR1	F5H2F9	F5H2F9	MSH6	DNA mismatch repair protein Msh6	unreviewed	1058	7	0.948
FXR1	Q5QPK2	Q5QPK2	DPM1	Dolichol-phosphate mannosyltransferase	unreviewed	287	2	0.82
FXR1	K7EK18	K7EK18	41526	Septin-9 (Fragment)	unreviewed	195	2	0.866
FXR1	J3QS62	J3QS62	CDK5RAP3	CDK5 regulatory subunit-associated protein 3 (Fragment)	unreviewed	196	4	0.904
FXR1	M0R0F0	M0R0F0	RPS5	40S ribosomal protein S5 (Fragment)	unreviewed	200	3	0.89
FXR1	M0R0P1	M0R0P1	FBL	rRNA 2'-O-methyltransferase fibrillarin (Fragment)	unreviewed	228	3	0.894
FXR1	J3QQV1	J3QQV1	RPL26	60S ribosomal protein L26	unreviewed	110	22	0.998
FXR1	C9J0K6	C9J0K6	SRI	Sorcin	unreviewed	155	6	0.956
FXR1	J3QL15	J3QL15	RPL19	Ribosomal protein L19 (Fragment)	unreviewed	128	2	0.828
FXR1	M0R1M5	M0R1M5	RPS16	40S ribosomal protein S16 (Fragment)	unreviewed	85	6	0.944
FXR1	F6SBX2	F6SBX2	IARS2	Isoleucine--tRNA ligase, mitochondrial	unreviewed	940	8	0.97
FXR1	E9PBJ5	E9PBJ5	SDHA	Succinate dehydrogenase [ubiquinone] flavoprotein subunit, mitochondrial	unreviewed	616	2	0.864
FXR1	D6REM6	D6REM6	MATR3	Matrin-3	unreviewed	794	2	0.854
FXR1	E7ETU7	E7ETU7	MRPL3	39S ribosomal protein L3, mitochondrial	unreviewed	375	2	0.852
FXR1	Q5T9B7	Q5T9B7	AK1	Adenylate kinase isoenzyme 1	unreviewed	210	3	0.884
FXR1	K7ES38	K7ES38	UBA2	SUMO-activating enzyme subunit 2	unreviewed	74	2	0.826
FXR1	E7EP00	E7EP00	SEC24C	Protein transport protein Sec24C	unreviewed	975	5	0.938
FXR1	Q5T6H7	Q5T6H7	XPNPEP1	Xaa-Pro aminopeptidase 1	unreviewed	552	4	0.924
FXR1	K7ERG1	K7ERG1	41526	Septin-9 (Fragment)	unreviewed	35	2	0.844
FXR1	I3L2B0	I3L2B0	CLUH	Clustered mitochondria protein homolog	unreviewed	769	7	0.95
FXR1	A8MQB8	A8MQB8	FMR1	Fragile X mental retardation protein 1	unreviewed	582	34	1
FXR1	E9PPU0	E9PPU0	EPPK1	Epiplakin	unreviewed	2420	205	1
FXR1	J3KPE3	J3KPE3	GNB2L1	Guanine nucleotide-binding protein subunit beta-2-like 1	unreviewed	273	3	0.902
FXR1	J9JID1	J9JID1	AURKB	Aurora kinase B	unreviewed	345	3	0.878
FXR1	F5H3P5	F5H3P5	ACTR3	Actin-related protein 3	unreviewed	356	2	0.856
FXR1	Q5JRI1	Q5JRI1	SRSF10	Serine/arginine-rich-splicing factor 10	unreviewed	172	6	0.952
FXR1	J3KPW7	J3KPW7	HDAC2	Histone deacetylase 2	unreviewed	582	3	0.9
FXR1	F5GYQ1	F5GYQ1	ATP6V0D1	V-type proton ATPase subunit d 1	unreviewed	392	4	0.902
FXR1	K7ELF1	K7ELF1	MRPL4	39S ribosomal protein L4, mitochondrial (Fragment)	unreviewed	163	2	0.866
FXR1	B5MD17	B5MD17	CBX1	Chromobox protein homolog 1 (Fragment)	unreviewed	168	3	0.894
FXR1	J3QQX2	J3QQX2	ARHGDIA	Rho GDP-dissociation inhibitor 1	unreviewed	235	8	0.962
FXR1	E2QRB9	E2QRB9	TXNRD1	Thioredoxin reductase 1, cytoplasmic	unreviewed	541	7	0.972
FXR1	C9JCA9	C9JCA9	LRPPRC	Leucine-rich PPR motif-containing protein, mitochondrial (Fragment)	unreviewed	359	2	0.864
FXR1	B1AL05	B1AL05	MRPL43	39S ribosomal protein L43, mitochondrial	unreviewed	184	2	0.862
FXR1	H3BUG4	H3BUG4	CIAPIN1	Anamorsin	unreviewed	188	2	0.842
FXR1	F8VP89	F8VP89	EIF4B	Eukaryotic translation initiation factor 4B (Fragment)	unreviewed	275	2	0.82
FXR1	E9PR16	E9PR16	NUP160	Nuclear pore complex protein Nup160	unreviewed	1037	2	0.888
FXR1	E9PRQ7	E9PRQ7	UBXN1	UBX domain-containing protein 1	unreviewed	293	2	0.836
FXR1	H0YF33	H0YF33	NASP	Nuclear autoantigenic sperm protein (Fragment)	unreviewed	288	2	0.848
FXR1	F5GY56	F5GY56	PRPF19	Pre-mRNA-processing factor 19 (Fragment)	unreviewed	252	2	0.858
FXR1	F5H345	F5H345	HMBS	Porphobilinogen deaminase	unreviewed	330	2	0.852
FXR1	E7EMU4	E7EMU4	DYNC1I2	Cytoplasmic dynein 1 intermediate chain 2 (Fragment)	unreviewed	214	2	0.832
FXR1	E7EX44	E7EX44	CALD1	Caldesmon	unreviewed	557	2	0.85
FXR1	K7EK45	K7EK45	PTBP1	Polypyrimidine tract-binding protein 1 (Fragment)	unreviewed	256	2	0.876
FXR1	A6NMH6	A6NMH6	41525	Septin-8	unreviewed	430	3	0.91
FXR1	F8VZQ9	F8VZQ9	SARNP	SAP domain-containing ribonucleoprotein	unreviewed	213	2	0.848
FXR1	E9PFR3	E9PFR3	PPP2R5D	Serine/threonine-protein phosphatase 2A 56 kDa regulatory subunit delta isoform	unreviewed	594	2	0.852
FXR1	F8W6P5	F8W6P5	HBB	LVV-hemorphin-7 (Fragment)	unreviewed	90	3	0.886
FXR1	E7EQN5	E7EQN5	ARHGAP4	Rho GTPase-activating protein 4	unreviewed	925	3	0.886
FXR1	F8VYY9	F8VYY9	PRKAG1	5'-AMP-activated protein kinase subunit gamma-1	unreviewed	280	6	0.936
FXR1	H7C3I1	H7C3I1	ST13	Hsc70-interacting protein (Fragment)	unreviewed	146	2	0.868
FXR1	E7ENY0	E7ENY0	ADD1	Alpha-adducin	unreviewed	663	2	0.842
FXR1	Q5JYR4	Q5JYR4	RPN2	Dolichyl-diphosphooligosaccharide--protein glycosyltransferase subunit 2 (Fragment)	unreviewed	167	18	0.884
FXR1	E7ET75	E7ET75	DIAPH1	Protein diaphanous homolog 1	unreviewed	1264	4	0.9
FXR1	C9K0G7	C9K0G7	BDH1	D-beta-hydroxybutyrate dehydrogenase, mitochondrial (Fragment)	unreviewed	166	2	0.84
FXR1	Q5TCU6	Q5TCU6	TLN1	Talin-1	unreviewed	2429	27	0.832
FXR1	F8VTU2	F8VTU2	LIMA1	LIM domain and actin-binding protein 1 (Fragment)	unreviewed	130	5	0.942
FXR1	E9PPC8	E9PPC8	PPP3CA	Serine/threonine-protein phosphatase (EC 3.1.3.16) (Fragment)	unreviewed	132	4	0.914
FXR1	F5H4H2	F5H4H2	ATP5J2	ATP synthase subunit f, mitochondrial	unreviewed	88	3	0.866
FXR1	H3BQD9	H3BQD9	VAC14	Protein VAC14 homolog (Fragment)	unreviewed	260	2	0.85
FXR1	E9PBG7	E9PBG7	CAMK2D	Calcium/calmodulin-dependent protein kinase type II subunit delta	unreviewed	512	4	0.932
FXR1	F5H5M9	F5H5M9	TNIK	TRAF2 and NCK-interacting protein kinase	unreviewed	1312	2	0.858
FXR1	F8W845	F8W845	CTNNA1	Catenin alpha-1	unreviewed	803	6	0.956
FXR1	Q5QPP3	Q5QPP3	GALE	UDP-glucose 4-epimerase (Fragment)	unreviewed	227	3	0.884
FXR1	H7C2G3	H7C2G3	C21orf33	ES1 protein homolog, mitochondrial (Fragment)	unreviewed	191	2	0.828
FXR1	E7ESL0	E7ESL0	MRPL22	39S ribosomal protein L22, mitochondrial	unreviewed	212	4	0.912
FXR1	H3BV22	H3BV22	PPP4C	Serine/threonine-protein phosphatase (EC 3.1.3.16) (Fragment)	unreviewed	203	2	0.834
FXR1	E9PKU7	E9PKU7	GANAB	Neutral alpha-glucosidase AB	unreviewed	852	2	0.856
FXR1	D6RHZ5	D6RHZ5	SEC31A	Protein transport protein Sec31A	unreviewed	877	3	0.912
FXR1	Q5JW30	Q5JW30	STAU1	Double-stranded RNA-binding protein Staufen homolog 1	unreviewed	494	8	0.982
FXR1	E7ETB7	E7ETB7	CASP8	Caspase-8 subunit p10 (Fragment)	unreviewed	198	3	0.904
FXR1	F5H1L6	F5H1L6	PPP1CA	Serine/threonine-protein phosphatase PP1-alpha catalytic subunit (Fragment)	unreviewed	169	3	0.858
FXR1	Q5T3Q7	Q5T3Q7	HEATR1	HEAT repeat-containing protein 1	unreviewed	2063	5	0.926
FXR1	Q5TBG7	Q5TBG7	NEK6	Serine/threonine-protein kinase Nek6 (Fragment)	unreviewed	219	2	0.86
FXR1	F5GX77	F5GX77	TRMT112	tRNA methyltransferase 112 homolog	unreviewed	106	3	0.85
FXR1	H0YF77	H0YF77	DPY19L2	Probable C-mannosyltransferase DPY19L2 (Fragment)	unreviewed	149	6	0.952
FXR1	H0YAK1	H0YAK1	GRSF1	G-rich sequence factor 1 (Fragment)	unreviewed	453	3	0.862
FXR1	E9PRQ6	E9PRQ6	ACAT1	Sterol O-acyltransferase 1	unreviewed	141	2	0.878
FXR1	H3BVI7	H3BVI7	CDH1	Fizzy-related protein homolog	unreviewed	414	2	0.844
FXR1	C9J9W2	C9J9W2	LASP1	LIM and SH3 domain protein 1 (Fragment)	unreviewed	166	4	0.9
FXR1	F5H4G7	F5H4G7	KPNA6	Importin subunit alpha	unreviewed	533	5	0.914
FXR1	E9PM69	E9PM69	PSMC3	26S protease regulatory subunit 6A	unreviewed	397	2	0.85
FXR1	Q5T6W8	Q5T6W8	ANP32B	Acidic leucine-rich nuclear phosphoprotein 32 family member B (Fragment)	unreviewed	156	6	0.954
FXR1	H7C0X4	H7C0X4	ALG3	Dol-P-Man:Man(5)GlcNAc(2)-PP-Dol alpha-1,3-mannosyltransferase (Fragment)	unreviewed	323	2	0.838
FXR1	H0YMZ1	H0YMZ1	PSMA4	Proteasome subunit alpha type (EC 3.4.25.1) (Fragment)	unreviewed	221	5	0.934
FXR1	Q5JRG1	Q5JRG1	NUPL1	Nucleoporin p58/p45 (Fragment)	unreviewed	463	2	0.852
FXR1	F8VR34	F8VR34	CS	Citrate synthase, mitochondrial (Fragment)	unreviewed	146	3	0.9
FXR1	E7ES33	E7ES33	41524	Septin-7	unreviewed	436	7	0.962
FXR1	E9PLH9	E9PLH9	TSTA3	GDP-L-fucose synthase (Fragment)	unreviewed	119	2	0.836
FXR1	H3BS70	H3BS70	ECI1	Enoyl-CoA delta isomerase 1, mitochondrial (Fragment)	unreviewed	224	2	0.878
FXR1	F8VZJ2	F8VZJ2	NACA	Nascent polypeptide-associated complex subunit alpha	unreviewed	136	5	0.928
FXR1	G3V2S9	G3V2S9	SLIRP	SRA stem-loop-interacting RNA-binding protein, mitochondrial	unreviewed	124	5	0.916
FXR1	E7EVY0	E7EVY0	OXA1L	Mitochondrial inner membrane protein OXA1L	unreviewed	408	2	0.85
FXR1	Q5JR08	Q5JR08	RHOC	Rho-related GTP-binding protein RhoC (Fragment)	unreviewed	189	9	0.974
FXR1	Q5T8N1	Q5T8N1	NUP133	Nuclear pore complex protein Nup133	unreviewed	1068	5	0.93
FXR1	D6RF83	D6RF83	PDLIM7	PDZ and LIM domain protein 7 (Fragment)	unreviewed	173	2	0.86
FXR1	Q5SX87	Q5SX87	GDI2	Rab GDP dissociation inhibitor beta (Fragment)	unreviewed	263	27	0.932
FXR1	F5H4X1	F5H4X1	USO1	General vesicular transport factor p115	unreviewed	947	5	0.934
FXR1	F8VXY3	F8VXY3	OAS1	2'-5'-oligoadenylate synthase 1	unreviewed	360	3	0.902
FXR1	H7C4B7	H7C4B7	DHCR24	Delta(24)-sterol reductase (Fragment)	unreviewed	154	3	0.876
FXR1	E7EV56	E7EV56	PCM1	Methyl-CpG-binding domain protein 1	unreviewed	1860	3	0.906
FXR1	F8VP63	F8VP63	ARL1	ADP-ribosylation factor-like protein 1	unreviewed	64	2	0.854
FXR1	F8W7C6	F8W7C6	RPL10	60S ribosomal protein L10	unreviewed	163	15	0.994
FXR1	E7ET59	E7ET59	INPP1	Inositol polyphosphate 1-phosphatase (Fragment)	unreviewed	190	3	0.884
FXR1	F2Z2S8	F2Z2S8	RPS3	40S ribosomal protein S3	unreviewed	117	6	0.938
FXR1	H0YJQ3	H0YJQ3	TTC8	Tetratricopeptide repeat protein 8 (Fragment)	unreviewed	265	4	0.916
FXR1	D6RAY7	D6RAY7	GNPDA1	Glucosamine-6-phosphate isomerase 1 (Fragment)	unreviewed	237	3	0.86
FXR1	C9JEU5	C9JEU5	FGG	Fibrinogen gamma chain	unreviewed	445	5	0.956
FXR1	E9PJI4	E9PJI4	CHEK1	Serine/threonine-protein kinase Chk1 (Fragment)	unreviewed	170	2	0.864
FXR1	E7EVX8	E7EVX8	PRPF31	U4/U6 small nuclear ribonucleoprotein Prp31	unreviewed	493	4	0.896
FXR1	Q5TA02	Q5TA02	GSTO1	Glutathione S-transferase omega-1 (Fragment)	unreviewed	200	4	0.914
FXR1	H7C1K5	H7C1K5	ANLN	Actin-binding protein anillin (Fragment)	unreviewed	277	4	0.898
FXR1	H0YIC4	H0YIC4	CS	Citrate synthase (Fragment)	unreviewed	123	5	0.94
FXR1	F8VV71	F8VV71	UBE2N	Ubiquitin-conjugating enzyme E2 N	unreviewed	152	4	0.906
FXR1	F5H1N1	F5H1N1	DNAJC11	DnaJ homolog subfamily C member 11	unreviewed	521	2	0.876
FXR1	H0YDC5	H0YDC5	PUM1	Pumilio homolog 1 (Fragment)	unreviewed	217	3	0.894
FXR1	C9JW96	C9JW96	PHB	Prohibitin (Fragment)	unreviewed	246	3	0.898
FXR1	F5GX23	F5GX23	PSMD9	26S proteasome non-ATPase regulatory subunit 9	unreviewed	179	4	0.908
FXR1	I3L504	I3L504	EIF5A	Eukaryotic translation initiation factor 5A-1	unreviewed	186	17	0.756
FXR1	Q5JS79	Q5JS79	CASK	Peripheral plasma membrane protein CASK (Fragment)	unreviewed	381	9	0.978
FXR1	H0YJ74	H0YJ74	BAZ1A	Bromodomain adjacent to zinc finger domain protein 1A (Fragment)	unreviewed	76	2	0.864
FXR1	F2Z2V0	F2Z2V0	CPNE1	Copine-1 (Fragment)	unreviewed	533	16	0.86
FXR1	C9J050	C9J050	PCYT1A	Choline-phosphate cytidylyltransferase A (Fragment)	unreviewed	293	3	0.882
FXR1	E9PEB5	E9PEB5	FUBP1	Far upstream element-binding protein 1	unreviewed	655	5	0.942
FXR1	H0Y9K8	H0Y9K8	CENPK	Centromere protein K (Fragment)	unreviewed	137	2	0.836
FXR1	H7C292	H7C292	INPP5D	Phosphatidylinositol 3,4,5-trisphosphate 5-phosphatase 1	unreviewed	941	2	0.864
FXR1	J3QS36	J3QS36	DCXR	L-xylulose reductase (Fragment)	unreviewed	225	5	0.92
FXR1	H3BS72	H3BS72	PTPLAD1	Very-long-chain (3R)-3-hydroxyacyl-[acyl-carrier protein] dehydratase 3	unreviewed	400	2	0.854
FXR1	Q5W0H4	Q5W0H4	TPT1	Translationally-controlled tumor protein	unreviewed	188	8	0.97
FXR1	H7BY36	H7BY36	EWSR1	RNA-binding protein EWS (Fragment)	unreviewed	308	7	0.962
FXR1	E7EPL9	E7EPL9	HSD17B4	Peroxisomal multifunctional enzyme type 2	unreviewed	474	2	0.83
FXR1	E9PKH6	E9PKH6	NDUFS8	NADH dehydrogenase [ubiquinone] iron-sulfur protein 8, mitochondrial (Fragment)	unreviewed	138	3	0.9
FXR1	Q5T948	Q5T948	PPP2R4	Serine/threonine-protein phosphatase 2A activator (Fragment)	unreviewed	254	2	0.832
FXR1	G3V4X8	G3V4X8	SNW1	SNW domain-containing protein 1	unreviewed	374	3	0.888
FXR1	G3V226	G3V226	CALM1	Calmodulin	unreviewed	76	2	0.83
FXR1	H0Y742	H0Y742	SUN1	SUN domain-containing protein 1 (Fragment)	unreviewed	710	3	0.846
FXR1	Q5STU3	Q5STU3	DDX39B	Spliceosome RNA helicase DDX39B	unreviewed	425	13	1
FXR1	E9PBK7	E9PBK7	MAPK3	Mitogen-activated protein kinase 3	unreviewed	311	4	0.926
FXR1	Q5VU77	Q5VU77	UBAP2L	Ubiquitin-associated protein 2-like (Fragment)	unreviewed	350	4	0.9
FXR1	F5GYN4	F5GYN4	OTUB1	Ubiquitin thioesterase OTUB1	unreviewed	241	9	0.98
FXR1	Q5T0H9	Q5T0H9	GSN	Gelsolin	unreviewed	485	4	0.922
FXR1	Q5LJA9	Q5LJA9	UCHL5	Ubiquitin carboxyl-terminal hydrolase isozyme L5 (Fragment)	unreviewed	368	2	0.854
FXR1	H3BMV3	H3BMV3	HN1L	Hematological and neurological-expressed 1-like protein (Fragment)	unreviewed	190	2	0.842
FXR1	E7ERI3	E7ERI3	TARS	Threonine--tRNA ligase, cytoplasmic	unreviewed	602	11	0.996
FXR1	F8VVA7	F8VVA7	COPZ1	Coatomer subunit zeta-1	unreviewed	198	2	0.866
FXR1	E7ENU4	E7ENU4	ADAR	Double-stranded RNA-specific adenosine deaminase	unreviewed	1269	4	0.904
FXR1	H7C040	H7C040	AGR3	Anterior gradient protein 3 homolog (Fragment)	unreviewed	129	4	0.9
FXR1	F5GZS6	F5GZS6	SLC3A2	4F2 cell-surface antigen heavy chain	unreviewed	599	3	0.884
FXR1	B8ZZ47	B8ZZ47	IMP4	U3 small nucleolar ribonucleoprotein protein IMP4	unreviewed	248	4	0.916
FXR1	E5RHT6	E5RHT6	ARFGAP1	ADP-ribosylation factor GTPase-activating protein 1 (Fragment)	unreviewed	244	4	0.9

## Sheet: FXR1_H358
Saint Bait	Prey	Entry_Database	Gene names	Protein names	Status	Length	Total Spec	Max SAINT
FXR1	P31946	P31946	YWHAB	14-3-3 protein beta/alpha (Protein 1054) (Protein kinase C inhibitor protein 1) (KCIP-1) [Cleaved into: 14-3-3 protein beta/alpha, N-terminally processed]	reviewed	246	14	0.994
FXR1	P62258	P62258	YWHAE	14-3-3 protein epsilon (14-3-3E)	reviewed	255	17	0.994
FXR1	Q04917	Q04917	YWHAH YWHA1	14-3-3 protein eta (Protein AS1)	reviewed	246	12	0.994
FXR1	P61981	P61981	YWHAG	14-3-3 protein gamma (Protein kinase C inhibitor protein 1) (KCIP-1) [Cleaved into: 14-3-3 protein gamma, N-terminally processed]	reviewed	247	14	0.996
FXR1	P31947	P31947	SFN HME1	14-3-3 protein sigma (Epithelial cell marker protein 1) (Stratifin)	reviewed	248	11	0.992
FXR1	P27348	P27348	YWHAQ	14-3-3 protein theta (14-3-3 protein T-cell) (14-3-3 protein tau) (Protein HS1)	reviewed	245	15	0.996
FXR1	P63151	P63151	PPP2R2A	Serine/threonine-protein phosphatase 2A 55 kDa regulatory subunit B alpha isoform (PP2A subunit B isoform B55-alpha) (PP2A subunit B isoform PR55-alpha) (PP2A subunit B isoform R2-alpha) (PP2A subunit B isoform alpha)	reviewed	447	2	0.904
FXR1	P61221	P61221	ABCE1 RLI RNASEL1 RNASELI RNS4I OK/SW-cl.40	ATP-binding cassette sub-family E member 1 (2'-5'-oligoadenylate-binding protein) (HuHP68) (RNase L inhibitor) (Ribonuclease 4 inhibitor) (RNS4I)	reviewed	599	3	0.92
FXR1	Q8NE71	Q8NE71	ABCF1 ABC50	ATP-binding cassette sub-family F member 1 (ATP-binding cassette 50) (TNF-alpha-stimulated ABC protein)	reviewed	845	2	0.902
FXR1	P53396	P53396	ACLY	ATP-citrate synthase (EC 2.3.3.8) (ATP-citrate (pro-S-)-lyase) (ACL) (Citrate cleavage enzyme)	reviewed	1101	15	0.99
FXR1	O95573	O95573	ACSL3 ACS3 FACL3 LACS3	Long-chain-fatty-acid--CoA ligase 3 (EC 6.2.1.3) (Long-chain acyl-CoA synthetase 3) (LACS 3)	reviewed	720	2	0.872
FXR1	P12814	P12814	ACTN1	Alpha-actinin-1 (Alpha-actinin cytoskeletal isoform) (F-actin cross-linking protein) (Non-muscle alpha-actinin-1)	reviewed	892	21	1
FXR1	O43707	O43707	ACTN4	Alpha-actinin-4 (F-actin cross-linking protein) (Non-muscle alpha-actinin 4)	reviewed	911	39	1
FXR1	Q9UKV8	Q9UKV8	AGO2 EIF2C2	Protein argonaute-2 (Argonaute2) (hAgo2) (EC 3.1.26.n2) (Argonaute RISC catalytic component 2) (Eukaryotic translation initiation factor 2C 2) (eIF-2C 2) (eIF2C 2) (PAZ Piwi domain protein) (PPD) (Protein slicer)	reviewed	859	2	0.912
FXR1	Q09666	Q09666	AHNAK PM227	Neuroblast differentiation-associated protein AHNAK (Desmoyokin)	reviewed	5890	98	0.998
FXR1	O95433	O95433	AHSA1 C14orf3 HSPC322	Activator of 90 kDa heat shock protein ATPase homolog 1 (AHA1) (p38)	reviewed	338	3	0.934
FXR1	Q12904	Q12904	AIMP1 EMAP2 SCYE1	Aminoacyl tRNA synthase complex-interacting multifunctional protein 1 (Multisynthase complex auxiliary component p43) [Cleaved into: Endothelial monocyte-activating polypeptide 2 (EMAP-2) (Endothelial monocyte-activating polypeptide II) (EMAP-II) (Small i	reviewed	312	2	0.892
FXR1	P51648	P51648	ALDH3A2 ALDH10 FALDH	Fatty aldehyde dehydrogenase (EC 1.2.1.3) (Aldehyde dehydrogenase 10) (Aldehyde dehydrogenase family 3 member A2) (Microsomal aldehyde dehydrogenase)	reviewed	485	2	0.906
FXR1	P04075	P04075	ALDOA ALDA	Fructose-bisphosphate aldolase A (EC 4.1.2.13) (Lung cancer antigen NY-LU-1) (Muscle-type aldolase)	reviewed	364	38	0.998
FXR1	P09972	P09972	ALDOC ALDC	Fructose-bisphosphate aldolase C (EC 4.1.2.13) (Brain-type aldolase)	reviewed	364	6	0.938
FXR1	P39687	P39687	ANP32A C15orf1 LANP MAPM PHAP1	Acidic leucine-rich nuclear phosphoprotein 32 family member A (Acidic nuclear phosphoprotein pp32) (Leucine-rich acidic nuclear protein) (LANP) (Mapmodulin) (Potent heat-stable protein phosphatase 2A inhibitor I1PP2A) (Putative HLA-DR-associated protein I	reviewed	249	3	0.95
FXR1	Q92688	Q92688	ANP32B APRIL PHAPI2	Acidic leucine-rich nuclear phosphoprotein 32 family member B (Acidic protein rich in leucines) (Putative HLA-DR-associated protein I-2) (PHAPI2) (Silver-stainable protein SSP29)	reviewed	251	4	0.954
FXR1	Q9BTT0	Q9BTT0	ANP32E	Acidic leucine-rich nuclear phosphoprotein 32 family member E (LANP-like protein) (LANP-L)	reviewed	268	7	0.974
FXR1	P04083	P04083	ANXA1 ANX1 LPC1	Annexin A1 (Annexin I) (Annexin-1) (Calpactin II) (Calpactin-2) (Chromobindin-9) (Lipocortin I) (Phospholipase A2 inhibitory protein) (p35)	reviewed	346	28	0.73
FXR1	P07355	P07355	ANXA2 ANX2 ANX2L4 CAL1H LPC2D	Annexin A2 (Annexin II) (Annexin-2) (Calpactin I heavy chain) (Calpactin-1 heavy chain) (Chromobindin-8) (Lipocortin II) (Placental anticoagulant protein IV) (PAP-IV) (Protein I) (p36)	reviewed	339	5	0.954
FXR1	P12429	P12429	ANXA3 ANX3	Annexin A3 (35-alpha calcimedin) (Annexin III) (Annexin-3) (Inositol 1,2-cyclic phosphate 2-phosphohydrolase) (Lipocortin III) (Placental anticoagulant protein III) (PAP-III)	reviewed	323	2	0.902
FXR1	P08758	P08758	ANXA5 ANX5 ENX2 PP4	Annexin A5 (Anchorin CII) (Annexin V) (Annexin-5) (Calphobindin I) (CBP-I) (Endonexin II) (Lipocortin V) (Placental anticoagulant protein 4) (PP4) (Placental anticoagulant protein I) (PAP-I) (Thromboplastin inhibitor) (Vascular anticoagulant-alpha) (VAC-a	reviewed	320	7	0.97
FXR1	Q7Z451	P63010	AP2B1 ADTB2 CLAPB1	AP-2 complex subunit beta (AP105B) (Adapter-related protein complex 2 subunit beta) (Adaptor protein complex AP-2 subunit beta) (Beta-2-adaptin) (Beta-adaptin) (Clathrin assembly protein complex 2 beta large chain) (Plasma membrane adaptor HA2/AP2 adaptin	reviewed	937	6	0.962
FXR1	O00203	O00203	AP3B1 ADTB3A	AP-3 complex subunit beta-1 (Adapter-related protein complex 3 subunit beta-1) (Adaptor protein complex AP-3 subunit beta-1) (Beta-3A-adaptin) (Clathrin assembly protein complex 3 beta-1 large chain)	reviewed	1094	2	0.778
FXR1	O14617	O14617	AP3D1 PRO0039	AP-3 complex subunit delta-1 (AP-3 complex subunit delta) (Adapter-related protein complex 3 subunit delta-1) (Delta-adaptin)	reviewed	1153	2	0.892
FXR1	Q92572	Q92572	AP3S1 CLAPS3	AP-3 complex subunit sigma-1 (AP-3 complex subunit sigma-3A) (Adapter-related protein complex 3 subunit sigma-1) (Clathrin-associated/assembly/adapter protein, small 3) (Sigma-3A-adaptin) (Sigma3A-adaptin) (Sigma-adaptin 3a)	reviewed	193	2	0.92
FXR1	P27695	P27695	APEX1 APE APE1 APEX APX HAP1 REF1	DNA-(apurinic or apyrimidinic site) lyase (EC 3.1.-.-) (EC 4.2.99.18) (APEX nuclease) (APEN) (Apurinic-apyrimidinic endonuclease 1) (AP endonuclease 1) (APE-1) (REF-1) (Redox factor-1) [Cleaved into: DNA-(apurinic or apyrimidinic site) lyase, mitochondria	reviewed	318	6	0.964
FXR1	Q92747	Q92747	ARPC1A SOP2L	Actin-related protein 2/3 complex subunit 1A (SOP2-like protein)	reviewed	370	2	0.904
FXR1	O15143	O15143	ARPC1B ARC41	Actin-related protein 2/3 complex subunit 1B (Arp2/3 complex 41 kDa subunit) (p41-ARC)	reviewed	372	4	0.942
FXR1	P61204	P61204	ARF3	ADP-ribosylation factor 3	reviewed	181	8	0.988
FXR1	P18085	P18085	ARF4 ARF2	ADP-ribosylation factor 4	reviewed	180	9	0.988
FXR1	P84085	P84085	ARF5	ADP-ribosylation factor 5	reviewed	180	7	0.982
FXR1	P62330	P62330	ARF6	ADP-ribosylation factor 6	reviewed	175	2	0.918
FXR1	P61160	P61160	ACTR2 ARP2	Actin-related protein 2 (Actin-like protein 2)	reviewed	394	7	0.954
FXR1	P61158	P61158	ACTR3 ARP3	Actin-related protein 3 (Actin-like protein 3)	reviewed	418	5	0.932
FXR1	O15144	O15144	ARPC2 ARC34 PRO2446	Actin-related protein 2/3 complex subunit 2 (Arp2/3 complex 34 kDa subunit) (p34-ARC)	reviewed	300	2	0.914
FXR1	P59998	P59998	ARPC4 ARC20	Actin-related protein 2/3 complex subunit 4 (Arp2/3 complex 20 kDa subunit) (p20-ARC)	reviewed	168	4	0.958
FXR1	P16615	P16615	ATP2A2 ATP2B	Sarcoplasmic/endoplasmic reticulum calcium ATPase 2 (SERCA2) (SR Ca(2+)-ATPase 2) (EC 3.6.3.8) (Calcium pump 2) (Calcium-transporting ATPase sarcoplasmic reticulum type, slow twitch skeletal muscle isoform) (Endoplasmic reticulum class 1/2 Ca(2+) ATPase)	reviewed	1042	14	0.996
FXR1	Q93084	Q93084	ATP2A3	Sarcoplasmic/endoplasmic reticulum calcium ATPase 3 (SERCA3) (SR Ca(2+)-ATPase 3) (EC 3.6.3.8) (Calcium pump 3)	reviewed	1043	3	0.912
FXR1	Q9NVI7	Q9NVI7	ATAD3A	ATPase family AAA domain-containing protein 3A	reviewed	634	3	0.926
FXR1	Q8WWM7	Q8WWM7	ATXN2L A2D A2LG A2LP A2RP	Ataxin-2-like protein (Ataxin-2 domain protein) (Ataxin-2-related protein)	reviewed	1075	10	0.992
FXR1	O75531	O75531	BANF1 BAF BCRG1	Barrier-to-autointegration factor (Breakpoint cluster region protein 1) [Cleaved into: Barrier-to-autointegration factor, N-terminally processed]	reviewed	89	3	0.97
FXR1	Q9NYF8	Q9NYF8	BCLAF1 BTF KIAA0164	Bcl-2-associated transcription factor 1 (Btf)	reviewed	920	3	0.914
FXR1	Q8TDN6	Q8TDN6	BRIX1 BRIX BXDC2	Ribosome biogenesis protein BRX1 homolog (Brix domain-containing protein 2)	reviewed	353	3	0.932
FXR1	Q7L1Q6	Q7L1Q6	BZW1 BZAP45 KIAA0005	Basic leucine zipper and W2 domain-containing protein 1 (Protein Orf)	reviewed	419	8	0.98
FXR1	Q9Y6E2	Q9Y6E2	BZW2 HSPC028 MSTP017	Basic leucine zipper and W2 domain-containing protein 2	reviewed	419	7	0.972
FXR1	Q07021	Q07021	C1QBP GC1QBP HABP1 SF2P32	Complement component 1 Q subcomponent-binding protein, mitochondrial (ASF/SF2-associated protein p32) (Glycoprotein gC1qBP) (C1qBP) (Hyaluronan-binding protein 1) (Mitochondrial matrix protein p32) (gC1q-R protein) (p33)	reviewed	282	3	0.94
FXR1	P11586	P11586	MTHFD1 MTHFC MTHFD	C-1-tetrahydrofolate synthase, cytoplasmic (C1-THF synthase) [Cleaved into: C-1-tetrahydrofolate synthase, cytoplasmic, N-terminally processed] [Includes: Methylenetetrahydrofolate dehydrogenase (EC 1.5.1.5); Methenyltetrahydrofolate cyclohydrolase (EC 3.	reviewed	935	12	0.98
FXR1	Q9Y376	Q9Y376	CAB39 MO25 CGI-66	Calcium-binding protein 39 (MO25alpha) (Protein Mo25)	reviewed	341	2	0.92
FXR1	P17655	P17655	CAPN2 CANPL2	Calpain-2 catalytic subunit (EC 3.4.22.53) (Calcium-activated neutral proteinase 2) (CANP 2) (Calpain M-type) (Calpain large polypeptide L2) (Calpain-2 large subunit) (Millimolar-calpain) (M-calpain)	reviewed	700	2	0.9
FXR1	Q86VP6	Q86VP6	CAND1 KIAA0829 TIP120 TIP120A	Cullin-associated NEDD8-dissociated protein 1 (Cullin-associated and neddylation-dissociated protein 1) (TBP-interacting protein of 120 kDa A) (TBP-interacting protein 120A) (p120 CAND1)	reviewed	1230	8	0.966
FXR1	P40121	P40121	CAPG AFCP MCP	Macrophage-capping protein (Actin regulatory protein CAP-G)	reviewed	348	3	0.922
FXR1	Q13185	Q13185	CBX3	Chromobox protein homolog 3 (HECH) (Heterochromatin protein 1 homolog gamma) (HP1 gamma) (Modifier 2 protein)	reviewed	183	8	0.986
FXR1	Q8N163	Q8N163	CCAR2 DBC1 KIAA1967	Cell cycle and apoptosis regulator protein 2 (Cell division cycle and apoptosis regulator protein 2) (DBIRD complex subunit KIAA1967) (Deleted in breast cancer gene 1 protein) (DBC-1) (DBC.1) (p30 DBC)	reviewed	923	11	0.98
FXR1	P60953	P60953	CDC42	Cell division control protein 42 homolog (G25K GTP-binding protein)	reviewed	191	4	0.95
FXR1	P06493	P06493	CDK1 CDC2 CDC28A CDKN1 P34CDC2	Cyclin-dependent kinase 1 (CDK1) (EC 2.7.11.22) (EC 2.7.11.23) (Cell division control protein 2 homolog) (Cell division protein kinase 1) (p34 protein kinase)	reviewed	297	3	0.914
FXR1	Q9NX63	Q9NX63	CHCHD3 MINOS3	Coiled-coil-helix-coiled-coil-helix domain-containing protein 3, mitochondrial	reviewed	227	3	0.934
FXR1	Q14839	Q14839	CHD4	Chromodomain-helicase-DNA-binding protein 4 (CHD-4) (EC 3.6.4.12) (ATP-dependent helicase CHD4) (Mi-2 autoantigen 218 kDa protein) (Mi2-beta)	reviewed	1912	7	0.966
FXR1	Q14011	Q14011	CIRBP A18HNRNP CIRP	Cold-inducible RNA-binding protein (A18 hnRNP) (Glycine-rich RNA-binding protein CIRP)	reviewed	172	3	0.964
FXR1	O00299	O00299	CLIC1 G6 NCC27	Chloride intracellular channel protein 1 (Chloride channel ABP) (Nuclear chloride ion channel 27) (NCC27) (Regulatory nuclear chloride ion channel protein) (hRNCC)	reviewed	241	6	0.976
FXR1	Q9Y224	Q9Y224	C14orf166 CGI-99	UPF0568 protein C14orf166 (CLE7 homolog) (CLE)	reviewed	244	7	0.966
FXR1	Q15021	Q15021	NCAPD2 CAPD2 CNAP1 KIAA0159	Condensin complex subunit 1 (Chromosome condensation-related SMC-associated protein 1) (Chromosome-associated protein D2) (hCAP-D2) (Non-SMC condensin I complex subunit D2) (XCAP-D2 homolog)	reviewed	1401	4	0.938
FXR1	A5YKK6	A5YKK6	CNOT1 CDC39 KIAA1007 NOT1 AD-005	CCR4-NOT transcription complex subunit 1 (CCR4-associated factor 1) (Negative regulator of transcription subunit 1 homolog) (NOT1H) (hNOT1)	reviewed	2376	18	0.996
FXR1	P53621	P53621	COPA	Coatomer subunit alpha (Alpha-coat protein) (Alpha-COP) (HEP-COP) (HEPCOP) [Cleaved into: Xenin (Xenopsin-related peptide); Proxenin]	reviewed	1224	13	0.98
FXR1	P35606	P35606	COPB2	Coatomer subunit beta' (Beta'-coat protein) (Beta'-COP) (p102)	reviewed	906	2	0.824
FXR1	P53618	P53618	COPB1 COPB MSTP026	Coatomer subunit beta (Beta-coat protein) (Beta-COP)	reviewed	953	2	0.88
FXR1	P48444	P48444	ARCN1 COPD	Coatomer subunit delta (Archain) (Delta-coat protein) (Delta-COP)	reviewed	511	7	0.964
FXR1	Q9Y678	Q9Y678	COPG1 COPG	Coatomer subunit gamma-1 (Gamma-1-coat protein) (Gamma-1-COP)	reviewed	874	3	0.93
FXR1	P31146	P31146	CORO1A CORO1	Coronin-1A (Coronin-like protein A) (Clipin-A) (Coronin-like protein p57) (Tryptophan aspartate-containing coat protein) (TACO)	reviewed	461	3	0.932
FXR1	A7MAP0	Q9ULV4	CORO1C CRN2 CRNN4	Coronin-1C (Coronin-3) (hCRNN4)	reviewed	474	8	0.984
FXR1	Q14019	Q14019	COTL1 CLP	Coactosin-like protein	reviewed	142	2	0.938
FXR1	O75131	O75131	CPNE3 CPN3 KIAA0636	Copine-3 (Copine III)	reviewed	537	3	0.932
FXR1	O43809	O43809	NUDT21 CFIM25 CPSF25 CPSF5	Cleavage and polyadenylation specificity factor subunit 5 (Cleavage and polyadenylation specificity factor 25 kDa subunit) (CFIm25) (CPSF 25 kDa subunit) (Nucleoside diphosphate-linked moiety X motif 21) (Nudix motif 21) (Pre-mRNA cleavage factor Im 25 kD	reviewed	227	4	0.952
FXR1	P52943	P52943	CRIP2 CRP2	Cysteine-rich protein 2 (CRP-2) (Protein ESP1)	reviewed	208	8	0.994
FXR1	O75534	O75534	CSDE1 D1S155E KIAA0885 NRU UNR	Cold shock domain-containing protein E1 (N-ras upstream gene protein) (Protein UNR)	reviewed	798	12	0.994
FXR1	P68400	P68400	CSNK2A1 CK2A1	Casein kinase II subunit alpha (CK II alpha) (EC 2.7.11.1)	reviewed	391	4	0.934
FXR1	Q13363	Q13363	CTBP1 CTBP	C-terminal-binding protein 1 (CtBP1) (EC 1.1.1.-)	reviewed	440	3	0.912
FXR1	P35222	P35222	CTNNB1 CTNNB OK/SW-cl.35 PRO2286	Catenin beta-1 (Beta-catenin)	reviewed	781	5	0.952
FXR1	O60716	O60716	CTNND1 KIAA0384	Catenin delta-1 (Cadherin-associated Src substrate) (CAS) (p120 catenin) (p120(ctn)) (p120(cas))	reviewed	968	13	1
FXR1	Q13619	Q13619	CUL4A	Cullin-4A (CUL-4A)	reviewed	759	5	0.956
FXR1	Q5R370	Q9HB71	CACYBP S100A6BP SIP PNAS-107	Calcyclin-binding protein (CacyBP) (hCacyBP) (S100A6-binding protein) (Siah-interacting protein)	reviewed	228	4	0.936
FXR1	Q7L576	Q7L576	CYFIP1 KIAA0068	Cytoplasmic FMR1-interacting protein 1 (Specifically Rac1-associated protein 1) (Sra-1) (p140sra-1)	reviewed	1253	5	0.954
FXR1	O43237	O43237	DYNC1LI2 DNCLI2 LIC2	Cytoplasmic dynein 1 light intermediate chain 2 (Dynein light intermediate chain 2, cytosolic) (LIC-2) (LIC53/55)	reviewed	492	2	0.904
FXR1	P61962	P61962	DCAF7 HAN11 WDR68	DDB1- and CUL4-associated factor 7 (WD repeat-containing protein 68) (WD repeat-containing protein An11 homolog)	reviewed	342	2	0.876
FXR1	Q16531	Q16531	DDB1 XAP1	DNA damage-binding protein 1 (DDB p127 subunit) (DNA damage-binding protein a) (DDBa) (Damage-specific DNA-binding protein 1) (HBV X-associated protein 1) (XAP-1) (UV-damaged DNA-binding factor) (UV-damaged DNA-binding protein 1) (UV-DDB 1) (XPE-binding f	reviewed	1140	2	0.834
FXR1	Q92841	Q92841	DDX17	Probable ATP-dependent RNA helicase DDX17 (EC 3.6.4.13) (DEAD box protein 17) (DEAD box protein p72) (RNA-dependent helicase p72)	reviewed	729	20	0.998
FXR1	Q9NVP1	Q9NVP1	DDX18	ATP-dependent RNA helicase DDX18 (EC 3.6.4.13) (DEAD box protein 18) (Myc-regulated DEAD box protein) (MrDb)	reviewed	670	6	0.948
FXR1	Q92499	Q92499	DDX1	ATP-dependent RNA helicase DDX1 (EC 3.6.4.13) (DEAD box protein 1) (DEAD box protein retinoblastoma) (DBP-RB)	reviewed	740	15	0.984
FXR1	Q9NR30	Q9NR30	DDX21	Nucleolar RNA helicase 2 (EC 3.6.4.13) (DEAD box protein 21) (Gu-alpha) (Nucleolar RNA helicase Gu) (Nucleolar RNA helicase II) (RH II/Gu)	reviewed	783	15	0.974
FXR1	Q96GQ7	Q96GQ7	DDX27 RHLP HSPC259 PP3241	Probable ATP-dependent RNA helicase DDX27 (EC 3.6.4.13) (DEAD box protein 27)	reviewed	796	3	0.922
FXR1	O00571	O00571	DDX3X DBX DDX3	ATP-dependent RNA helicase DDX3X (EC 3.6.4.13) (DEAD box protein 3, X-chromosomal) (DEAD box, X isoform) (Helicase-like protein 2) (HLP2)	reviewed	662	34	1
FXR1	Q86XP3	Q86XP3	DDX42	ATP-dependent RNA helicase DDX42 (EC 3.6.4.13) (DEAD box protein 42) (RNA helicase-like protein) (RHELP) (RNA helicase-related protein) (RNAHP) (SF3b DEAD box protein) (Splicing factor 3B-associated 125 kDa protein) (SF3b125)	reviewed	938	45	1
FXR1	Q7L014	Q7L014	DDX46 KIAA0801	Probable ATP-dependent RNA helicase DDX46 (EC 3.6.4.13) (DEAD box protein 46) (PRP5 homolog)	reviewed	1031	8	0.984
FXR1	P26196	P26196	DDX6 HLR2 RCK	Probable ATP-dependent RNA helicase DDX6 (EC 3.6.4.13) (ATP-dependent RNA helicase p54) (DEAD box protein 6) (Oncogene RCK)	reviewed	483	8	0.96
FXR1	P35659	P35659	DEK	Protein DEK	reviewed	375	5	0.968
FXR1	P60981	P60981	DSTN ACTDP DSN	Destrin (Actin-depolymerizing factor) (ADF)	reviewed	165	6	0.984
FXR1	Q13268	Q13268	DHRS2	Dehydrogenase/reductase SDR family member 2, mitochondrial (EC 1.1.1.-) (Dicarbonyl reductase HEP27) (Protein D)	reviewed	280	24	0.996
FXR1	Q00796	Q00796	SORD	Sorbitol dehydrogenase (EC 1.1.1.14) (L-iditol 2-dehydrogenase)	reviewed	357	8	0.984
FXR1	O60231	O60231	DHX16 DBP2 DDX16 KIAA0577	Putative pre-mRNA-splicing factor ATP-dependent RNA helicase DHX16 (EC 3.6.4.13) (ATP-dependent RNA helicase #3) (DEAH-box protein 16)	reviewed	1041	7	0.95
FXR1	Q7L2E3	Q7L2E3	DHX30 DDX30 KIAA0890	Putative ATP-dependent RNA helicase DHX30 (EC 3.6.4.13) (DEAH box protein 30)	reviewed	1194	3	0.936
FXR1	O60884	O60884	DNAJA2 CPR3 HIRIP4	DnaJ homolog subfamily A member 2 (Cell cycle progression restoration gene 3 protein) (Dnj3) (Dj3) (HIRA-interacting protein 4) (Renal carcinoma antigen NY-REN-14)	reviewed	412	2	0.9
FXR1	Q9Y295	Q9Y295	DRG1 NEDD3	Developmentally-regulated GTP-binding protein 1 (DRG-1) (Neural precursor cell expressed developmentally down-regulated protein 3) (NEDD-3)	reviewed	367	4	0.92
FXR1	P55265	P55265	ADAR ADAR1 DSRAD G1P1 IFI4	Double-stranded RNA-specific adenosine deaminase (DRADA) (EC 3.5.4.37) (136 kDa double-stranded RNA-binding protein) (p136) (Interferon-inducible protein 4) (IFI-4) (K88DSRBP)	reviewed	1226	8	0.97
FXR1	O00148	O00148	DDX39A DDX39	ATP-dependent RNA helicase DDX39A (EC 3.6.4.13) (DEAD box protein 39) (Nuclear RNA helicase URH49)	reviewed	427	5	0.958
FXR1	Q14204	Q14204	DYNC1H1 DHC1 DNCH1 DNCL DNECL DYHC KIAA0325	Cytoplasmic dynein 1 heavy chain 1 (Cytoplasmic dynein heavy chain 1) (Dynein heavy chain, cytosolic)	reviewed	4646	55	1
FXR1	Q96FJ2	Q96FJ2	DYNLL2 DLC2	Dynein light chain 2, cytoplasmic (8 kDa dynein light chain b) (DLC8b) (Dynein light chain LC8-type 2)	reviewed	89	2	0.942
FXR1	Q99848	Q99848	EBNA1BP2 EBP2	Probable rRNA-processing protein EBP2 (EBNA1-binding protein 2) (Nucleolar protein p40)	reviewed	306	3	0.922
FXR1	P40939	P40939	HADHA HADH	Trifunctional enzyme subunit alpha, mitochondrial (78 kDa gastrin-binding protein) (TP-alpha) [Includes: Long-chain enoyl-CoA hydratase (EC 4.2.1.17); Long chain 3-hydroxyacyl-CoA dehydrogenase (EC 1.1.1.211)]	reviewed	763	8	0.98
FXR1	P55084	P55084	HADHB MSTP029	Trifunctional enzyme subunit beta, mitochondrial (TP-beta) [Includes: 3-ketoacyl-CoA thiolase (EC 2.3.1.16) (Acetyl-CoA acyltransferase) (Beta-ketothiolase)]	reviewed	474	3	0.908
FXR1	Q5VYK3	Q5VYK3	ECM29 KIAA0368	Proteasome-associated protein ECM29 homolog (Ecm29)	reviewed	1845	3	0.912
FXR1	Q6P2E9	Q6P2E9	EDC4 HEDLS	Enhancer of mRNA-decapping protein 4 (Autoantigen Ge-1) (Autoantigen RCD-8) (Human enhancer of decapping large subunit) (Hedls)	reviewed	1401	4	0.948
FXR1	Q05639	Q05639	EEF1A2 EEF1AL STN	Elongation factor 1-alpha 2 (EF-1-alpha-2) (Eukaryotic elongation factor 1 A-2) (eEF1A-2) (Statin-S1)	reviewed	463	19	0.998
FXR1	P29692	P29692	EEF1D EF1D	Elongation factor 1-delta (EF-1-delta) (Antigen NY-CO-4)	reviewed	281	15	0.996
FXR1	P13639	P13639	EEF2 EF2	Elongation factor 2 (EF-2)	reviewed	858	57	1
FXR1	P49411	P49411	TUFM	Elongation factor Tu, mitochondrial (EF-Tu) (P43)	reviewed	452	7	0.958
FXR1	Q14152	Q14152	EIF3A EIF3S10 KIAA0139	Eukaryotic translation initiation factor 3 subunit A (eIF3a) (Eukaryotic translation initiation factor 3 subunit 10) (eIF-3-theta) (eIF3 p167) (eIF3 p180) (eIF3 p185)	reviewed	1382	20	0.99
FXR1	P55884	P55884	EIF3B EIF3S9	Eukaryotic translation initiation factor 3 subunit B (eIF3b) (Eukaryotic translation initiation factor 3 subunit 9) (Prt1 homolog) (hPrt1) (eIF-3-eta) (eIF3 p110) (eIF3 p116)	reviewed	814	8	0.968
FXR1	O15371	O15371	EIF3D EIF3S7	Eukaryotic translation initiation factor 3 subunit D (eIF3d) (Eukaryotic translation initiation factor 3 subunit 7) (eIF-3-zeta) (eIF3 p66)	reviewed	548	4	0.95
FXR1	P60228	P60228	EIF3E EIF3S6 INT6	Eukaryotic translation initiation factor 3 subunit E (eIF3e) (Eukaryotic translation initiation factor 3 subunit 6) (Viral integration site protein INT-6 homolog) (eIF-3 p48)	reviewed	445	4	0.942
FXR1	O00303	O00303	EIF3F EIF3S5	Eukaryotic translation initiation factor 3 subunit F (eIF3f) (Deubiquitinating enzyme eIF3f) (EC 3.4.19.12) (Eukaryotic translation initiation factor 3 subunit 5) (eIF-3-epsilon) (eIF3 p47)	reviewed	357	3	0.916
FXR1	O75821	O75821	EIF3G EIF3S4	Eukaryotic translation initiation factor 3 subunit G (eIF3g) (Eukaryotic translation initiation factor 3 RNA-binding subunit) (eIF-3 RNA-binding subunit) (Eukaryotic translation initiation factor 3 subunit 4) (eIF-3-delta) (eIF3 p42) (eIF3 p44)	reviewed	320	3	0.936
FXR1	Q13347	Q13347	EIF3I EIF3S2 TRIP1	Eukaryotic translation initiation factor 3 subunit I (eIF3i) (Eukaryotic translation initiation factor 3 subunit 2) (TGF-beta receptor-interacting protein 1) (TRIP-1) (eIF-3-beta) (eIF3 p36)	reviewed	325	2	0.898
FXR1	Q9Y262	Q9Y262	EIF3L EIF3EIP EIF3S6IP HSPC021 HSPC025 MSTP005	Eukaryotic translation initiation factor 3 subunit L (eIF3l) (Eukaryotic translation initiation factor 3 subunit 6-interacting protein) (Eukaryotic translation initiation factor 3 subunit E-interacting protein)	reviewed	564	3	0.932
FXR1	B5ME19	B5ME19	EIF3CL	Eukaryotic translation initiation factor 3 subunit C-like protein	reviewed	914	9	0.978
FXR1	Q15717	Q15717	ELAVL1 HUR	ELAV-like protein 1 (Hu-antigen R) (HuR)	reviewed	326	4	0.97
FXR1	P14625	P14625	HSP90B1 GRP94 TRA1	Endoplasmin (94 kDa glucose-regulated protein) (GRP-94) (Heat shock protein 90 kDa beta member 1) (Tumor rejection antigen 1) (gp96 homolog)	reviewed	803	7	0.964
FXR1	P29317	P29317	EPHA2 ECK	Ephrin type-A receptor 2 (EC 2.7.10.1) (Epithelial cell kinase) (Tyrosine-protein kinase receptor ECK)	reviewed	976	2	0.87
FXR1	J3KQG6	P15170	GSPT1 ERF3A	Eukaryotic peptide chain release factor GTP-binding subunit ERF3A (Eukaryotic peptide chain release factor subunit 3a) (eRF3a) (G1 to S phase transition protein 1 homolog)	reviewed	499	5	0.952
FXR1	O94905	O94905	ERLIN2 C8orf2 SPFH2 UNQ2441/PRO5003/PRO9924	Erlin-2 (Endoplasmic reticulum lipid raft-associated protein 2) (Stomatin-prohibitin-flotillin-HflC/K domain-containing protein 2) (SPFH domain-containing protein 2)	reviewed	339	2	0.876
FXR1	Q9H6S3	Q9H6S3	EPS8L2 EPS8R2 PP13181	Epidermal growth factor receptor kinase substrate 8-like protein 2 (EPS8-like protein 2) (Epidermal growth factor receptor pathway substrate 8-related protein 2) (EPS8-related protein 2)	reviewed	715	2	0.914
FXR1	Q6NXG1	Q6NXG1	ESRP1 RBM35A	Epithelial splicing regulatory protein 1 (RNA-binding motif protein 35A) (RNA-binding protein 35A)	reviewed	681	6	0.954
FXR1	Q9BSJ8	Q9BSJ8	ESYT1 FAM62A KIAA0747 MBC2	Extended synaptotagmin-1 (E-Syt1) (Membrane-bound C2 domain-containing protein)	reviewed	1104	2	0.85
FXR1	Q01844	Q01844	EWSR1 EWS	RNA-binding protein EWS (EWS oncogene) (Ewing sarcoma breakpoint region 1 protein)	reviewed	656	4	0.956
FXR1	Q01780	Q01780	EXOSC10 PMSCL PMSCL2 RRP6	Exosome component 10 (EC 3.1.13.-) (Autoantigen PM/Scl 2) (P100 polymyositis-scleroderma overlap syndrome-associated autoantigen) (Polymyositis/scleroderma autoantigen 100 kDa) (PM/Scl-100) (Polymyositis/scleroderma autoantigen 2)	reviewed	885	3	0.93
FXR1	P15311	P15311	EZR VIL2	Ezrin (Cytovillin) (Villin-2) (p81)	reviewed	586	24	1
FXR1	Q9NZB2	Q9NZB2	FAM120A C9orf10 KIAA0183 OSSA	Constitutive coactivator of PPAR-gamma-like protein 1 (Oxidative stress-associated Src activator) (Protein FAM120A)	reviewed	1118	5	0.964
FXR1	P49327	P49327	FASN FAS	Fatty acid synthase (EC 2.3.1.85) [Includes: [Acyl-carrier-protein] S-acetyltransferase (EC 2.3.1.38); [Acyl-carrier-protein] S-malonyltransferase (EC 2.3.1.39); 3-oxoacyl-[acyl-carrier-protein] synthase (EC 2.3.1.41); 3-oxoacyl-[acyl-carrier-protein] red	reviewed	2511	206	0.926
FXR1	P39748	P39748	FEN1 RAD2	Flap endonuclease 1 (FEN-1) (EC 3.1.-.-) (DNase IV) (Flap structure-specific endonuclease 1) (Maturation factor 1) (MF1) (hFEN-1)	reviewed	380	3	0.926
FXR1	Q14192	Q14192	FHL2 DRAL SLIM3	Four and a half LIM domains protein 2 (FHL-2) (LIM domain protein DRAL) (Skeletal muscle LIM-protein 3) (SLIM-3)	reviewed	279	2	0.908
FXR1	Q00688	Q00688	FKBP3 FKBP25	Peptidyl-prolyl cis-trans isomerase FKBP3 (PPIase FKBP3) (EC 5.2.1.8) (25 kDa FK506-binding protein) (25 kDa FKBP) (FKBP-25) (FK506-binding protein 3) (FKBP-3) (Immunophilin FKBP25) (Rapamycin-selective 25 kDa immunophilin) (Rotamase)	reviewed	224	4	0.94
FXR1	Q02790	Q02790	FKBP4 FKBP52	Peptidyl-prolyl cis-trans isomerase FKBP4 (PPIase FKBP4) (EC 5.2.1.8) (51 kDa FK506-binding protein) (FKBP51) (52 kDa FK506-binding protein) (52 kDa FKBP) (FKBP-52) (59 kDa immunophilin) (p59) (FK506-binding protein 4) (FKBP-4) (FKBP59) (HSP-binding immun	reviewed	459	2	0.898
FXR1	Q13045	Q13045	FLII FLIL	Protein flightless-1 homolog	reviewed	1269	2	0.908
FXR1	O75369	O75369	FLNB FLN1L FLN3 TABP TAP	Filamin-B (FLN-B) (ABP-278) (ABP-280 homolog) (Actin-binding-like protein) (Beta-filamin) (Filamin homolog 1) (Fh1) (Filamin-3) (Thyroid autoantigen) (Truncated actin-binding protein) (Truncated ABP)	reviewed	2602	43	0.998
FXR1	Q06787	Q06787	FMR1	Fragile X mental retardation protein 1 (FMRP) (Protein FMR-1)	reviewed	632	25	0.998
FXR1	Q16658	Q16658	FSCN1 FAN1 HSN SNL	Fascin (55 kDa actin-bundling protein) (Singed-like protein) (p55)	reviewed	493	15	0.996
FXR1	Q92945	Q92945	KHSRP FUBP2	Far upstream element-binding protein 2 (FUSE-binding protein 2) (KH type-splicing regulatory protein) (KSRP) (p75)	reviewed	711	9	0.976
FXR1	Q96I24	Q96I24	FUBP3 FBP3	Far upstream element-binding protein 3 (FUSE-binding protein 3)	reviewed	572	10	0.986
FXR1	P35637	P35637	FUS TLS	RNA-binding protein FUS (75 kDa DNA-pairing protein) (Oncogene FUS) (Oncogene TLS) (POMp75) (Translocated in liposarcoma protein)	reviewed	526	15	0.99
FXR1	P51114	P51114	FXR1	Fragile X mental retardation syndrome-related protein 1 (hFXR1p)	reviewed	621	2	0.886
FXR1	P51116	P51116	FXR2 FMR1L2	Fragile X mental retardation syndrome-related protein 2	reviewed	673	18	0.992
FXR1	Q13283	Q13283	G3BP1 G3BP	Ras GTPase-activating protein-binding protein 1 (G3BP-1) (EC 3.6.4.12) (EC 3.6.4.13) (ATP-dependent DNA helicase VIII) (hDH VIII) (GAP SH3 domain-binding protein 1)	reviewed	466	6	0.976
FXR1	Q9UN86	Q9UN86	G3BP2 KIAA0660	Ras GTPase-activating protein-binding protein 2 (G3BP-2) (GAP SH3 domain-binding protein 2)	reviewed	482	6	0.964
FXR1	P04406	P04406	GAPDH GAPD CDABP0047 OK/SW-cl.12	Glyceraldehyde-3-phosphate dehydrogenase (GAPDH) (EC 1.2.1.12) (Peptidyl-cysteine S-nitrosylase GAPDH) (EC 2.6.99.-)	reviewed	335	25	0.998
FXR1	P11413	P11413	G6PD	Glucose-6-phosphate 1-dehydrogenase (G6PD) (EC 1.1.1.49)	reviewed	515	9	0.99
FXR1	P06744	P06744	GPI	Glucose-6-phosphate isomerase (GPI) (EC 5.3.1.9) (Autocrine motility factor) (AMF) (Neuroleukin) (NLK) (Phosphoglucose isomerase) (PGI) (Phosphohexose isomerase) (PHI) (Sperm antigen 36) (SA-36)	reviewed	558	4	0.932
FXR1	P63244	P63244	GNB2L1 HLC7 PIG21	Guanine nucleotide-binding protein subunit beta-2-like 1 (Cell proliferation-inducing gene 21 protein) (Guanine nucleotide-binding protein subunit beta-like protein 12.3) (Human lung cancer oncogene 7 protein) (HLC-7) (Receptor for activated C kinase) (Re	reviewed	317	19	1
FXR1	Q92616	Q92616	GCN1L1 KIAA0219	Translational activator GCN1 (HsGCN1) (GCN1-like protein 1)	reviewed	2671	28	0.99
FXR1	Q8TEQ6	Q8TEQ6	GEMIN5	Gem-associated protein 5 (Gemin5)	reviewed	1508	8	0.97
FXR1	Q06210	Q06210	GFPT1 GFAT GFPT	Glutamine--fructose-6-phosphate aminotransferase [isomerizing] 1 (EC 2.6.1.16) (D-fructose-6-phosphate amidotransferase 1) (Glutamine:fructose-6-phosphate amidotransferase 1) (GFAT 1) (GFAT1) (Hexosephosphate aminotransferase 1)	reviewed	699	9	0.968
FXR1	Q04446	Q04446	GBE1	1,4-alpha-glucan-branching enzyme (EC 2.4.1.18) (Brancher enzyme) (Glycogen-branching enzyme)	reviewed	702	2	0.912
FXR1	Q9BVP2	Q9BVP2	GNL3 E2IG3 NS	Guanine nucleotide-binding protein-like 3 (E2-induced gene 3 protein) (Novel nucleolar protein 47) (NNP47) (Nucleolar GTP-binding protein 3) (Nucleostemin)	reviewed	549	2	0.91
FXR1	P78347	P78347	GTF2I BAP135 WBSCR6	General transcription factor II-I (GTFII-I) (TFII-I) (Bruton tyrosine kinase-associated protein 135) (BAP-135) (BTK-associated protein 135) (SRF-Phox1-interacting protein) (SPIN) (Williams-Beuren syndrome chromosomal region 6 protein)	reviewed	998	10	0.988
FXR1	Q96QV6	Q96QV6	HIST1H2AA H2AFR	Histone H2A type 1-A (Histone H2A/r)	reviewed	131	11	0.984
FXR1	O75367	O75367	H2AFY MACROH2A1	Core histone macro-H2A.1 (Histone macroH2A1) (mH2A1) (Histone H2A.y) (H2A/y) (Medulloblastoma antigen MU-MB-50.205)	reviewed	372	10	0.994
FXR1	Q96A08	Q96A08	HIST1H2BA TSH2B	Histone H2B type 1-A (Histone H2B, testis) (TSH2B.1) (Testis-specific histone H2B)	reviewed	127	17	0.988
FXR1	Q13547	Q13547	HDAC1 RPD3L1	Histone deacetylase 1 (HD1) (EC 3.5.1.98)	reviewed	482	5	0.95
FXR1	Q5SZ07	P51858	HDGF HMG1L2	Hepatoma-derived growth factor (HDGF) (High mobility group protein 1-like 2) (HMG-1L2)	reviewed	240	2	0.908
FXR1	P49773	P49773	HINT1 HINT PKCI1 PRKCNH1	Histidine triad nucleotide-binding protein 1 (EC 3.-.-.-) (Adenosine 5'-monophosphoramidase) (Protein kinase C inhibitor 1) (Protein kinase C-interacting protein 1) (PKCI-1)	reviewed	126	3	0.944
FXR1	P17096	P17096	HMGA1 HMGIY	High mobility group protein HMG-I/HMG-Y (HMG-I(Y)) (High mobility group AT-hook protein 1) (High mobility group protein A1) (High mobility group protein R)	reviewed	107	2	0.892
FXR1	P26583	P26583	HMGB2 HMG2	High mobility group protein B2 (High mobility group protein 2) (HMG-2)	reviewed	209	9	0.994
FXR1	O14979	O14979	HNRNPDL HNRPDL JKTBP	Heterogeneous nuclear ribonucleoprotein D-like (hnRNP D-like) (hnRNP DL) (AU-rich element RNA-binding factor) (JKT41-binding protein) (Protein laAUF1)	reviewed	420	15	0.988
FXR1	P31942	P31942	HNRNPH3 HNRPH3	Heterogeneous nuclear ribonucleoprotein H3 (hnRNP H3) (Heterogeneous nuclear ribonucleoprotein 2H9) (hnRNP 2H9)	reviewed	346	6	0.974
FXR1	Q9BUJ2	Q9BUJ2	HNRNPUL1 E1BAP5 HNRPUL1	Heterogeneous nuclear ribonucleoprotein U-like protein 1 (Adenovirus early region 1B-associated protein 5) (E1B-55 kDa-associated protein 5) (E1B-AP5)	reviewed	856	5	0.95
FXR1	O60506	O60506	SYNCRIP HNRPQ NSAP1	Heterogeneous nuclear ribonucleoprotein Q (hnRNP Q) (Glycine- and tyrosine-rich RNA-binding protein) (GRY-RBP) (NS1-associated protein 1) (Synaptotagmin-binding, cytoplasmic RNA-interacting protein)	reviewed	623	10	0.98
FXR1	Q5SSJ5	Q5SSJ5	HP1BP3	Heterochromatin protein 1-binding protein 3 (Protein HP1-BP74)	reviewed	553	3	0.942
FXR1	Q92598	Q92598	HSPH1 HSP105 HSP110 KIAA0201	Heat shock protein 105 kDa (Antigen NY-CO-25) (Heat shock 110 kDa protein)	reviewed	858	4	0.932
FXR1	O14602	O14602	EIF1AY	Eukaryotic translation initiation factor 1A, Y-chromosomal (eIF-1A Y isoform) (Eukaryotic translation initiation factor 4C) (eIF-4C)	reviewed	144	3	0.93
FXR1	P20042	P20042	EIF2S2 EIF2B	Eukaryotic translation initiation factor 2 subunit 2 (Eukaryotic translation initiation factor 2 subunit beta) (eIF-2-beta)	reviewed	333	3	0.916
FXR1	P41091	P41091	EIF2S3 EIF2G	Eukaryotic translation initiation factor 2 subunit 3 (Eukaryotic translation initiation factor 2 subunit gamma X) (eIF-2-gamma X) (eIF-2gX)	reviewed	472	12	0.994
FXR1	P60842	P60842	EIF4A1 DDX2A EIF4A	Eukaryotic initiation factor 4A-I (eIF-4A-I) (eIF4A-I) (EC 3.6.4.13) (ATP-dependent RNA helicase eIF4A-1)	reviewed	406	29	1
FXR1	P38919	P38919	EIF4A3 DDX48 KIAA0111	Eukaryotic initiation factor 4A-III (eIF-4A-III) (eIF4A-III) (EC 3.6.4.13) (ATP-dependent RNA helicase DDX48) (ATP-dependent RNA helicase eIF4A-3) (DEAD box protein 48) (Eukaryotic initiation factor 4A-like NUK-34) (Eukaryotic translation initiation facto	reviewed	411	14	1
FXR1	P06730	P06730	EIF4E EIF4EL1 EIF4F	Eukaryotic translation initiation factor 4E (eIF-4E) (eIF4E) (eIF-4F 25 kDa subunit) (mRNA cap-binding protein)	reviewed	217	3	0.932
FXR1	G5E9S1	Q04637	EIF4G1 EIF4F EIF4G EIF4GI	Eukaryotic translation initiation factor 4 gamma 1 (eIF-4-gamma 1) (eIF-4G 1) (eIF-4G1) (p220)	reviewed	1599	19	0.998
FXR1	Q15056	Q15056	EIF4H KIAA0038 WBSCR1 WSCR1	Eukaryotic translation initiation factor 4H (eIF-4H) (Williams-Beuren syndrome chromosomal region 1 protein)	reviewed	248	4	0.95
FXR1	P55010	P55010	EIF5	Eukaryotic translation initiation factor 5 (eIF-5)	reviewed	431	3	0.932
FXR1	Q12906	Q12906	ILF3 DRBF MPHOSPH4 NF90	Interleukin enhancer-binding factor 3 (Double-stranded RNA-binding protein 76) (DRBP76) (M-phase phosphoprotein 4) (MPP4) (Nuclear factor associated with dsRNA) (NFAR) (Nuclear factor of activated T-cells 90 kDa) (NF-AT-90) (Translational control protein	reviewed	894	15	0.996
FXR1	P52292	P52292	KPNA2 RCH1 SRP1	Importin subunit alpha-1 (Karyopherin subunit alpha-2) (RAG cohort protein 1) (SRP1-alpha)	reviewed	529	4	0.948
FXR1	Q14974	Q14974	KPNB1 NTF97	Importin subunit beta-1 (Importin-90) (Karyopherin subunit beta-1) (Nuclear factor p97) (Pore targeting complex 97 kDa subunit) (PTAC97)	reviewed	876	8	0.952
FXR1	P12268	P12268	IMPDH2 IMPD2	Inosine-5'-monophosphate dehydrogenase 2 (IMP dehydrogenase 2) (IMPD 2) (IMPDH 2) (EC 1.1.1.205) (IMPDH-II)	reviewed	514	3	0.928
FXR1	Q27J81	Q27J81	INF2 C14orf151 C14orf173	Inverted formin-2 (HBEBP2-binding protein C)	reviewed	1249	7	0.966
FXR1	Q8TEX9	Q8TEX9	IPO4 IMP4B RANBP4	Importin-4 (Imp4) (Importin-4b) (Imp4b) (Ran-binding protein 4) (RanBP4)	reviewed	1081	7	0.978
FXR1	O00410	O00410	IPO5 KPNB3 RANBP5	Importin-5 (Imp5) (Importin subunit beta-3) (Karyopherin beta-3) (Ran-binding protein 5) (RanBP5)	reviewed	1097	15	0.996
FXR1	O95373	O95373	IPO7 RANBP7	Importin-7 (Imp7) (Ran-binding protein 7) (RanBP7)	reviewed	1038	3	0.932
FXR1	P46940	P46940	IQGAP1 KIAA0051	Ras GTPase-activating-like protein IQGAP1 (p195)	reviewed	1657	17	0.984
FXR1	P05161	P05161	ISG15 G1P2 UCRP	Ubiquitin-like protein ISG15 (Interferon-induced 15 kDa protein) (Interferon-induced 17 kDa protein) (IP17) (Ubiquitin cross-reactive protein) (hUCRP)	reviewed	165	2	0.918
FXR1	P16144	P16144	ITGB4	Integrin beta-4 (GP150) (CD antigen CD104)	reviewed	1822	2	0.898
FXR1	P08237	P08237	PFKM PFKX	6-phosphofructokinase, muscle type (EC 2.7.1.11) (Phosphofructo-1-kinase isozyme A) (PFK-A) (Phosphofructokinase-M) (Phosphofructokinase 1) (Phosphohexokinase)	reviewed	780	3	0.924
FXR1	P17858	P17858	PFKL	6-phosphofructokinase, liver type (EC 2.7.1.11) (Phosphofructo-1-kinase isozyme B) (PFK-B) (Phosphofructokinase 1) (Phosphohexokinase)	reviewed	780	3	0.926
FXR1	Q01813	Q01813	PFKP PFKF	6-phosphofructokinase type C (EC 2.7.1.11) (6-phosphofructokinase, platelet type) (Phosphofructo-1-kinase isozyme C) (PFK-C) (Phosphofructokinase 1) (Phosphohexokinase)	reviewed	784	6	0.962
FXR1	P12277	P12277	CKB CKBB	Creatine kinase B-type (EC 2.7.3.2) (B-CK) (Creatine kinase B chain)	reviewed	381	47	1
FXR1	Q07666	Q07666	KHDRBS1 SAM68	KH domain-containing, RNA-binding, signal transduction-associated protein 1 (GAP-associated tyrosine phosphoprotein p62) (Src-associated in mitosis 68 kDa protein) (Sam68) (p21 Ras GTPase-activating protein-associated p62) (p68)	reviewed	443	13	0.988
FXR1	P33176	P33176	KIF5B KNS KNS1	Kinesin-1 heavy chain (Conventional kinesin heavy chain) (Ubiquitous kinesin heavy chain) (UKHC)	reviewed	963	7	0.95
FXR1	P0CF74	P0CF74	IGLC6	Ig lambda-6 chain C region	reviewed	106	2	0.922
FXR1	P42166	P42166	TMPO LAP2	Lamina-associated polypeptide 2, isoform alpha (Thymopoietin isoform alpha) (TP alpha) (Thymopoietin-related peptide isoform alpha) (TPRP isoform alpha) [Cleaved into: Thymopoietin (TP) (Splenin); Thymopentin (TP5)]	reviewed	694	3	0.942
FXR1	Q14847	Q14847	LASP1 MLN50	LIM and SH3 domain protein 1 (LASP-1) (Metastatic lymph node gene 50 protein) (MLN 50)	reviewed	261	5	0.962
FXR1	Q14739	Q14739	LBR	Lamin-B receptor (Integral nuclear envelope inner membrane protein) (LMN2R)	reviewed	615	2	0.896
FXR1	Q9Y383	Q9Y383	LUC7L2 CGI-59 CGI-74	Putative RNA-binding protein Luc7-like 2	reviewed	392	3	0.92
FXR1	P00338	P00338	LDHA PIG19	L-lactate dehydrogenase A chain (LDH-A) (EC 1.1.1.27) (Cell proliferation-inducing gene 19 protein) (LDH muscle subunit) (LDH-M) (Renal carcinoma antigen NY-REN-59)	reviewed	332	18	0.998
FXR1	P07195	P07195	LDHB	L-lactate dehydrogenase B chain (LDH-B) (EC 1.1.1.27) (LDH heart subunit) (LDH-H) (Renal carcinoma antigen NY-REN-46)	reviewed	334	11	0.994
FXR1	P09382	P09382	LGALS1	Galectin-1 (Gal-1) (14 kDa laminin-binding protein) (HLBP14) (14 kDa lectin) (Beta-galactoside-binding lectin L-14-I) (Galaptin) (HBL) (HPL) (Lactose-binding lectin 1) (Lectin galactoside-binding soluble 1) (Putative MAPK-activating protein PM12) (S-Lac l	reviewed	135	4	0.97
FXR1	P17931	P17931	LGALS3 MAC2	Galectin-3 (Gal-3) (35 kDa lectin) (Carbohydrate-binding protein 35) (CBP 35) (Galactose-specific lectin 3) (Galactoside-binding protein) (GALBP) (IgE-binding protein) (L-31) (Laminin-binding protein) (Lectin L-29) (Mac-2 antigen)	reviewed	250	8	0.992
FXR1	P09960	P09960	LTA4H LTA4	Leukotriene A-4 hydrolase (LTA-4 hydrolase) (EC 3.3.2.6) (Leukotriene A(4) hydrolase)	reviewed	611	2	0.914
FXR1	P20700	P20700	LMNB1 LMN2 LMNB	Lamin-B1	reviewed	586	36	0.906
FXR1	Q03252	Q03252	LMNB2 LMN2	Lamin-B2	reviewed	600	11	0.984
FXR1	P42704	P42704	LRPPRC LRP130	Leucine-rich PPR motif-containing protein, mitochondrial (130 kDa leucine-rich protein) (LRP 130) (GP130)	reviewed	1394	20	0.998
FXR1	Q96AG4	Q96AG4	LRRC59 PRO1855	Leucine-rich repeat-containing protein 59 (Ribosome-binding protein p34) (p34)	reviewed	307	2	0.898
FXR1	O95372	O95372	LYPLA2 APT2	Acyl-protein thioesterase 2 (APT-2) (EC 3.1.2.-) (Lysophospholipase II) (LPL-II) (LysoPLA II)	reviewed	231	3	0.93
FXR1	Q86UE4	Q86UE4	MTDH AEG1 LYRIC	Protein LYRIC (3D3/LYRIC) (Astrocyte elevated gene-1 protein) (AEG-1) (Lysine-rich CEACAM1 co-isolated protein) (Metadherin) (Metastasis adhesion protein)	reviewed	582	2	0.894
FXR1	P43243	P43243	MATR3 KIAA0723	Matrin-3	reviewed	847	17	0.994
FXR1	Q9BQG0	Q9BQG0	MYBBP1A P160	Myb-binding protein 1A	reviewed	1328	3	0.942
FXR1	P49736	P49736	MCM2 BM28 CCNL1 CDCL1 KIAA0030	DNA replication licensing factor MCM2 (EC 3.6.4.12) (Minichromosome maintenance protein 2 homolog) (Nuclear protein BM28)	reviewed	904	9	0.972
FXR1	P25205	P25205	MCM3	DNA replication licensing factor MCM3 (EC 3.6.4.12) (DNA polymerase alpha holoenzyme-associated protein P1) (P1-MCM3) (RLF subunit beta) (p102)	reviewed	808	11	0.97
FXR1	P33991	P33991	MCM4 CDC21	DNA replication licensing factor MCM4 (EC 3.6.4.12) (CDC21 homolog) (P1-CDC21)	reviewed	863	8	0.966
FXR1	P33992	P33992	MCM5 CDC46	DNA replication licensing factor MCM5 (EC 3.6.4.12) (CDC46 homolog) (P1-CDC46)	reviewed	734	7	0.958
FXR1	Q14566	Q14566	MCM6	DNA replication licensing factor MCM6 (EC 3.6.4.12) (p105MCM)	reviewed	821	10	0.964
FXR1	P33993	P33993	MCM7 CDC47 MCM2	DNA replication licensing factor MCM7 (EC 3.6.4.12) (CDC47 homolog) (P1.1-MCM3)	reviewed	719	19	0.996
FXR1	P40926	P40926	MDH2	Malate dehydrogenase, mitochondrial (EC 1.1.1.37)	reviewed	338	3	0.918
FXR1	Q96A72	Q96A72	MAGOHB MAGOH2	Protein mago nashi homolog 2	reviewed	148	5	0.972
FXR1	P14174	P14174	MIF GLIF MMIF	Macrophage migration inhibitory factor (MIF) (EC 5.3.2.1) (Glycosylation-inhibiting factor) (GIF) (L-dopachrome isomerase) (L-dopachrome tautomerase) (EC 5.3.3.12) (Phenylpyruvate tautomerase)	reviewed	115	4	0.972
FXR1	O14950	O14950	MYL12B MRLC2 MYLC2B	Myosin regulatory light chain 12B (MLC-2A) (MLC-2) (Myosin regulatory light chain 2-B, smooth muscle isoform) (Myosin regulatory light chain 20 kDa) (MLC20) (Myosin regulatory light chain MRLC2) (SHUJUN-1)	reviewed	172	9	0.988
FXR1	P26038	P26038	MSN	Moesin (Membrane-organizing extension spike protein)	reviewed	577	15	0.988
FXR1	P43246	P43246	MSH2	DNA mismatch repair protein Msh2 (hMSH2) (MutS protein homolog 2)	reviewed	934	5	0.966
FXR1	Q14764	Q14764	MVP LRP	Major vault protein (MVP) (Lung resistance-related protein)	reviewed	893	2	0.844
FXR1	P35580	P35580	MYH10	Myosin-10 (Cellular myosin heavy chain, type B) (Myosin heavy chain 10) (Myosin heavy chain, non-muscle IIb) (Non-muscle myosin heavy chain B) (NMMHC-B) (Non-muscle myosin heavy chain IIb) (NMMHC II-b) (NMMHC-IIB)	reviewed	1976	23	0.994
FXR1	O43795	O43795	MYO1B	Unconventional myosin-Ib (MYH-1c) (Myosin I alpha) (MMI-alpha) (MMIa)	reviewed	1136	5	0.964
FXR1	Q9UM54	Q9UM54	MYO6 KIAA0389	Unconventional myosin-VI (Unconventional myosin-6)	reviewed	1294	7	0.968
FXR1	Q9NZM1	Q9NZM1	MYOF FER1L3 KIAA1207	Myoferlin (Fer-1-like protein 3)	reviewed	2061	8	0.978
FXR1	Q9NPC6	Q9NPC6	MYOZ2 C4orf5	Myozenin-2 (Calsarcin-1) (FATZ-related protein 2)	reviewed	264	2	0.914
FXR1	Q9BXJ9	Q9BXJ9	NAA15 GA19 NARG1 NATH TBDN100	N-alpha-acetyltransferase 15, NatA auxiliary subunit (Gastric cancer antigen Ga19) (N-terminal acetyltransferase) (NMDA receptor-regulated protein 1) (Protein tubedown-1) (Tbdn100)	reviewed	866	3	0.932
FXR1	Q9H0A0	Q9H0A0	NAT10 ALP KIAA1709	N-acetyltransferase 10 (EC 2.3.1.-)	reviewed	1025	4	0.934
FXR1	P15531	P15531	NME1 NDPKA NM23	Nucleoside diphosphate kinase A (NDK A) (NDP kinase A) (EC 2.7.4.6) (Granzyme A-activated DNase) (GAAD) (Metastasis inhibition factor nm23) (Tumor metastatic process-associated protein) (nm23-H1)	reviewed	152	16	0.996
FXR1	P55769	P55769	NHP2L1	NHP2-like protein 1 (High mobility group-like nuclear protein 2 homolog 1) (OTK27) (SNU13 homolog) (hSNU13) (U4/U6.U5 tri-snRNP 15.5 kDa protein) [Cleaved into: NHP2-like protein 1, N-terminally processed]	reviewed	128	3	0.962
FXR1	Q96TA1	Q96TA1	FAM129B C9orf88	Niban-like protein 1 (Meg-3) (Melanoma invasion by ERK) (MINERVA) (Protein FAM129B)	reviewed	746	2	0.888
FXR1	Q9BZE4	Q9BZE4	GTPBP4 CRFG NOG1	Nucleolar GTP-binding protein 1 (Chronic renal failure gene protein) (GTP-binding protein NGB)	reviewed	634	4	0.928
FXR1	Q9Y3C1	Q9Y3C1	NOP16 CGI-117 HSPC111	Nucleolar protein 16 (HBV pre-S2 trans-regulated protein 3)	reviewed	178	4	0.952
FXR1	P46087	P46087	NOP2 NOL1	Putative ribosomal RNA methyltransferase NOP2 (EC 2.1.1.-) (Nucleolar protein 1) (Nucleolar protein 2 homolog) (Proliferating-cell nucleolar antigen p120) (Proliferation-associated nucleolar protein p120)	reviewed	812	4	0.942
FXR1	O00567	O00567	NOP56 NOL5A	Nucleolar protein 56 (Nucleolar protein 5A)	reviewed	594	7	0.942
FXR1	Q9Y2X3	Q9Y2X3	NOP58 NOL5 NOP5 HSPC120	Nucleolar protein 58 (Nucleolar protein 5)	reviewed	529	5	0.944
FXR1	Q08J23	Q08J23	NSUN2 SAKI TRM4	tRNA (cytosine(34)-C(5))-methyltransferase (EC 2.1.1.203) (Myc-induced SUN domain-containing protein) (Misu) (NOL1/NOP2/Sun domain family member 2) (Substrate of AIM1/Aurora kinase B) (tRNA (cytosine-5-)-methyltransferase) (tRNA methyltransferase 4 homolo	reviewed	767	5	0.946
FXR1	O75694	O75694	NUP155 KIAA0791	Nuclear pore complex protein Nup155 (155 kDa nucleoporin) (Nucleoporin Nup155)	reviewed	1391	7	0.978
FXR1	Q92621	Q92621	NUP205 C7orf14 KIAA0225	Nuclear pore complex protein Nup205 (205 kDa nucleoporin) (Nucleoporin Nup205)	reviewed	2012	4	0.922
FXR1	Q9Y266	Q9Y266	NUDC	Nuclear migration protein nudC (Nuclear distribution protein C homolog)	reviewed	331	4	0.942
FXR1	Q14980	Q14980	NUMA1 NUMA	Nuclear mitotic apparatus protein 1 (NuMA protein) (SP-H antigen)	reviewed	2115	3	0.926
FXR1	Q8N1F7	Q8N1F7	NUP93 KIAA0095	Nuclear pore complex protein Nup93 (93 kDa nucleoporin) (Nucleoporin Nup93)	reviewed	819	6	0.958
FXR1	P10515	P10515	DLAT DLTA	Dihydrolipoyllysine-residue acetyltransferase component of pyruvate dehydrogenase complex, mitochondrial (EC 2.3.1.12) (70 kDa mitochondrial autoantigen of primary biliary cirrhosis) (PBC) (Dihydrolipoamide acetyltransferase component of pyruvate dehydrog	reviewed	647	3	0.922
FXR1	Q9NTK5	Q9NTK5	OLA1 GTPBP9 PRO2455 PTD004	Obg-like ATPase 1 (DNA damage-regulated overexpressed in cancer 45) (DOC45) (GTP-binding protein 9)	reviewed	396	6	0.966
FXR1	P39656	P39656	DDOST KIAA0115 OST48 OK/SW-cl.45	Dolichyl-diphosphooligosaccharide--protein glycosyltransferase 48 kDa subunit (DDOST 48 kDa subunit) (Oligosaccharyl transferase 48 kDa subunit) (EC 2.4.99.18)	reviewed	456	5	0.944
FXR1	P32322	P32322	PYCR1	Pyrroline-5-carboxylate reductase 1, mitochondrial (P5C reductase 1) (P5CR 1) (EC 1.5.1.2)	reviewed	319	4	0.942
FXR1	P54886	P54886	ALDH18A1 GSAS P5CS PYCS	Delta-1-pyrroline-5-carboxylate synthase (P5CS) (Aldehyde dehydrogenase family 18 member A1) [Includes: Glutamate 5-kinase (GK) (EC 2.7.2.11) (Gamma-glutamyl kinase); Gamma-glutamyl phosphate reductase (GPR) (EC 1.2.1.41) (Glutamate-5-semialdehyde dehydro	reviewed	795	2	0.842
FXR1	Q9UQ80	Q9UQ80	PA2G4 EBP1	Proliferation-associated protein 2G4 (Cell cycle protein p38-2G4 homolog) (hG4-1) (ErbB3-binding protein 1)	reviewed	394	7	0.976
FXR1	P11940	P11940	PABPC1 PAB1 PABP1 PABPC2	Polyadenylate-binding protein 1 (PABP-1) (Poly(A)-binding protein 1)	reviewed	636	12	0.99
FXR1	Q9H361	Q9H361	PABPC3 PABP3 PABPL3	Polyadenylate-binding protein 3 (PABP-3) (Poly(A)-binding protein 3) (Testis-specific poly(A)-binding protein)	reviewed	631	3	0.93
FXR1	Q13310	Q13310	PABPC4 APP1 PABP4	Polyadenylate-binding protein 4 (PABP-4) (Poly(A)-binding protein 4) (Activated-platelet protein 1) (APP-1) (Inducible poly(A)-binding protein) (iPABP)	reviewed	644	12	0.994
FXR1	Q8NC51	Q8NC51	SERBP1 PAIRBP1 CGI-55	Plasminogen activator inhibitor 1 RNA-binding protein (PAI1 RNA-binding protein 1) (PAI-RBP1) (SERPINE1 mRNA-binding protein 1)	reviewed	408	9	0.988
FXR1	Q15365	Q15365	PCBP1	Poly(rC)-binding protein 1 (Alpha-CP1) (Heterogeneous nuclear ribonucleoprotein E1) (hnRNP E1) (Nucleic acid-binding protein SUB2.3)	reviewed	356	25	0.922
FXR1	Q15366	Q15366	PCBP2	Poly(rC)-binding protein 2 (Alpha-CP2) (Heterogeneous nuclear ribonucleoprotein E2) (hnRNP E2)	reviewed	365	14	1
FXR1	P12004	P12004	PCNA	Proliferating cell nuclear antigen (PCNA) (Cyclin)	reviewed	261	4	0.948
FXR1	O75340	O75340	PDCD6 ALG2	Programmed cell death protein 6 (Apoptosis-linked gene 2 protein) (Probable calcium-binding protein ALG-2)	reviewed	191	2	0.902
FXR1	P30101	P30101	PDIA3 ERP57 ERP60 GRP58	Protein disulfide-isomerase A3 (EC 5.3.4.1) (58 kDa glucose-regulated protein) (58 kDa microsomal protein) (p58) (Disulfide isomerase ER-60) (Endoplasmic reticulum resident protein 57) (ER protein 57) (ERp57) (Endoplasmic reticulum resident protein 60) (E	reviewed	505	2	0.902
FXR1	Q9BY77	Q9BY77	POLDIP3 KIAA1649 PDIP46	Polymerase delta-interacting protein 3 (46 kDa DNA polymerase delta interaction protein) (p46) (S6K1 Aly/REF-like target) (SKAR)	reviewed	421	3	0.932
FXR1	O00151	O00151	PDLIM1 CLIM1 CLP36	PDZ and LIM domain protein 1 (C-terminal LIM domain protein 1) (Elfin) (LIM domain protein CLP-36)	reviewed	329	7	0.974
FXR1	Q96HC4	Q96HC4	PDLIM5 ENH L9	PDZ and LIM domain protein 5 (Enigma homolog) (Enigma-like PDZ and LIM domains protein)	reviewed	596	2	0.892
FXR1	Q9UHV9	Q9UHV9	PFDN2 PFD2 HSPC231	Prefoldin subunit 2	reviewed	154	2	0.912
FXR1	P61758	P61758	VBP1 PFDN3	Prefoldin subunit 3 (HIBBJ46) (Von Hippel-Lindau-binding protein 1) (VBP-1) (VHL-binding protein 1)	reviewed	197	2	0.88
FXR1	Q96HS1	Q96HS1	PGAM5	Serine/threonine-protein phosphatase PGAM5, mitochondrial (EC 3.1.3.16) (Bcl-XL-binding protein v68) (Phosphoglycerate mutase family member 5)	reviewed	289	3	0.942
FXR1	P00558	P00558	PGK1 PGKA MIG10 OK/SW-cl.110	Phosphoglycerate kinase 1 (EC 2.7.2.3) (Cell migration-inducing gene 10 protein) (Primer recognition protein 2) (PRP 2)	reviewed	417	62	1
FXR1	P35232	P35232	PHB	Prohibitin	reviewed	272	7	0.988
FXR1	Q7RTV0	Q7RTV0	PHF5A	PHD finger-like domain-containing protein 5A (PHD finger-like domain protein 5A) (Splicing factor 3B-associated 14 kDa protein) (SF3b14b)	reviewed	110	2	0.92
FXR1	P14923	P14923	JUP CTNNG DP3	Junction plakoglobin (Catenin gamma) (Desmoplakin III) (Desmoplakin-3)	reviewed	745	8	0.964
FXR1	Q15149	Q15149	PLEC PLEC1	Plectin (PCN) (PLTN) (Hemidesmosomal protein 1) (HD1) (Plectin-1)	reviewed	4684	375	1
FXR1	Q9Y3B4	Q9Y3B4	SF3B14 CGI-110 HSPC175 HT006	Pre-mRNA branch site protein p14 (SF3b 14 kDa subunit)	reviewed	125	3	0.98
FXR1	P62136	P62136	PPP1CA PPP1A	Serine/threonine-protein phosphatase PP1-alpha catalytic subunit (PP-1A) (EC 3.1.3.16)	reviewed	330	10	0.992
FXR1	P62140	P62140	PPP1CB	Serine/threonine-protein phosphatase PP1-beta catalytic subunit (PP-1B) (PPP1CD) (EC 3.1.3.16) (EC 3.1.3.53)	reviewed	327	9	0.99
FXR1	P62937	P62937	PPIA CYPA	Peptidyl-prolyl cis-trans isomerase A (PPIase A) (EC 5.2.1.8) (Cyclophilin A) (Cyclosporin A-binding protein) (Rotamase A) [Cleaved into: Peptidyl-prolyl cis-trans isomerase A, N-terminally processed]	reviewed	165	14	0.99
FXR1	P23284	P23284	PPIB CYPB	Peptidyl-prolyl cis-trans isomerase B (PPIase B) (EC 5.2.1.8) (CYP-S1) (Cyclophilin B) (Rotamase B) (S-cyclophilin) (SCYLP)	reviewed	216	4	0.958
FXR1	O15355	O15355	PPM1G PPM1C	Protein phosphatase 1G (EC 3.1.3.16) (Protein phosphatase 1C) (Protein phosphatase 2C isoform gamma) (PP2C-gamma) (Protein phosphatase magnesium-dependent 1 gamma)	reviewed	546	2	0.906
FXR1	Q9Y520	Q9Y520	PRRC2C BAT2D1 BAT2L2 KIAA1096 XTP2	Protein PRRC2C (BAT2 domain-containing protein 1) (HBV X-transactivated gene 2 protein) (HBV XAg-transactivated protein 2) (HLA-B-associated transcript 2-like 2) (Proline-rich and coiled-coil-containing protein 2C)	reviewed	2896	5	0.96
FXR1	P32119	P32119	PRDX2 NKEFB TDPX1	Peroxiredoxin-2 (EC 1.11.1.15) (Natural killer cell-enhancing factor B) (NKEF-B) (PRP) (Thiol-specific antioxidant protein) (TSA) (Thioredoxin peroxidase 1) (Thioredoxin-dependent peroxide reductase 1)	reviewed	198	11	0.996
FXR1	P30044	P30044	PRDX5 ACR1 SBBI10	Peroxiredoxin-5, mitochondrial (EC 1.11.1.15) (Alu corepressor 1) (Antioxidant enzyme B166) (AOEB166) (Liver tissue 2D-page spot 71B) (PLP) (Peroxiredoxin V) (Prx-V) (Peroxisomal antioxidant enzyme) (TPx type VI) (Thioredoxin peroxidase PMP20) (Thioredoxi	reviewed	214	4	0.956
FXR1	P30041	P30041	PRDX6 AOP2 KIAA0106	Peroxiredoxin-6 (EC 1.11.1.15) (1-Cys peroxiredoxin) (1-Cys PRX) (24 kDa protein) (Acidic calcium-independent phospholipase A2) (aiPLA2) (EC 3.1.1.-) (Antioxidant protein 2) (Liver 2D page spot 40) (Non-selenium glutathione peroxidase) (NSGPx) (EC 1.11.1.	reviewed	224	5	0.986
FXR1	P78527	P78527	PRKDC HYRC HYRC1	DNA-dependent protein kinase catalytic subunit (DNA-PK catalytic subunit) (DNA-PKcs) (EC 2.7.11.1) (DNPK1) (p460)	reviewed	4128	96	1
FXR1	P07737	P07737	PFN1	Profilin-1 (Epididymis tissue protein Li 184a) (Profilin I)	reviewed	140	12	0.988
FXR1	P35080	P35080	PFN2	Profilin-2 (Profilin II)	reviewed	140	2	0.926
FXR1	Q9UMS4	Q9UMS4	PRPF19 NMP200 PRP19 SNEV	Pre-mRNA-processing factor 19 (Nuclear matrix protein 200) (PRP19/PSO4 homolog) (hPso4) (Senescence evasion factor)	reviewed	504	6	0.954
FXR1	O94906	O94906	PRPF6 C20orf14	Pre-mRNA-processing factor 6 (Androgen receptor N-terminal domain-transactivating protein 1) (ANT-1) (PRP6 homolog) (U5 snRNP-associated 102 kDa protein) (U5-102 kDa protein)	reviewed	941	2	0.86
FXR1	P11908	P11908	PRPS2	Ribose-phosphate pyrophosphokinase 2 (EC 2.7.6.1) (PPRibP) (Phosphoribosyl pyrophosphate synthase II) (PRS-II)	reviewed	318	3	0.942
FXR1	P62333	P62333	PSMC6 SUG2	26S protease regulatory subunit 10B (26S proteasome AAA-ATPase subunit RPT4) (Proteasome 26S subunit ATPase 6) (Proteasome subunit p42)	reviewed	389	4	0.942
FXR1	P25788	P25788	PSMA3 HC8 PSC8	Proteasome subunit alpha type-3 (EC 3.4.25.1) (Macropain subunit C8) (Multicatalytic endopeptidase complex subunit C8) (Proteasome component C8)	reviewed	255	2	0.898
FXR1	P28066	P28066	PSMA5	Proteasome subunit alpha type-5 (EC 3.4.25.1) (Macropain zeta chain) (Multicatalytic endopeptidase complex zeta chain) (Proteasome zeta chain)	reviewed	241	2	0.922
FXR1	O14818	O14818	PSMA7 HSPC	Proteasome subunit alpha type-7 (EC 3.4.25.1) (Proteasome subunit RC6-1) (Proteasome subunit XAPC7)	reviewed	248	2	0.92
FXR1	P49721	P49721	PSMB2	Proteasome subunit beta type-2 (EC 3.4.25.1) (Macropain subunit C7-I) (Multicatalytic endopeptidase complex subunit C7-I) (Proteasome component C7-I)	reviewed	201	2	0.9
FXR1	P49720	P49720	PSMB3	Proteasome subunit beta type-3 (EC 3.4.25.1) (Proteasome chain 13) (Proteasome component C10-II) (Proteasome theta chain)	reviewed	205	2	0.92
FXR1	O00487	O00487	PSMD14 POH1	26S proteasome non-ATPase regulatory subunit 14 (EC 3.4.19.-) (26S proteasome regulatory subunit RPN11) (26S proteasome-associated PAD1 homolog 1)	reviewed	310	2	0.896
FXR1	Q13200	Q13200	PSMD2 TRAP2	26S proteasome non-ATPase regulatory subunit 2 (26S proteasome regulatory subunit RPN1) (26S proteasome regulatory subunit S2) (26S proteasome subunit p97) (Protein 55.11) (Tumor necrosis factor type 1 receptor-associated protein 2)	reviewed	908	6	0.956
FXR1	O43242	O43242	PSMD3	26S proteasome non-ATPase regulatory subunit 3 (26S proteasome regulatory subunit RPN3) (26S proteasome regulatory subunit S3) (Proteasome subunit p58)	reviewed	534	3	0.92
FXR1	Q16401	Q16401	PSMD5 KIAA0072	26S proteasome non-ATPase regulatory subunit 5 (26S protease subunit S5 basic) (26S proteasome subunit S5B)	reviewed	504	3	0.932
FXR1	Q15008	Q15008	PSMD6 KIAA0107 PFAAP4	26S proteasome non-ATPase regulatory subunit 6 (26S proteasome regulatory subunit RPN7) (26S proteasome regulatory subunit S10) (Breast cancer-associated protein SGA-113M) (Phosphonoformate immuno-associated protein 4) (Proteasome regulatory particle subu	reviewed	389	2	0.892
FXR1	Q8WXF1	Q8WXF1	PSPC1 PSP1	Paraspeckle component 1 (Paraspeckle protein 1)	reviewed	523	4	0.942
FXR1	P26599	P26599	PTBP1 PTB	Polypyrimidine tract-binding protein 1 (PTB) (57 kDa RNA-binding protein PPTB-1) (Heterogeneous nuclear ribonucleoprotein I) (hnRNP I)	reviewed	531	19	0.988
FXR1	Q9UHX1	Q9UHX1	PUF60 FIR ROBPI SIAHBP1	Poly(U)-binding-splicing factor PUF60 (60 kDa poly(U)-binding-splicing factor) (FUSE-binding protein-interacting repressor) (FBP-interacting repressor) (Ro-binding protein 1) (RoBP1) (Siah-binding protein 1) (Siah-BP1)	reviewed	559	4	0.924
FXR1	P22102	P22102	GART PGFT PRGS	Trifunctional purine biosynthetic protein adenosine-3 [Includes: Phosphoribosylamine--glycine ligase (EC 6.3.4.13) (Glycinamide ribonucleotide synthetase) (GARS) (Phosphoribosylglycinamide synthetase); Phosphoribosylformylglycinamidine cyclo-ligase (EC 6.	reviewed	1010	6	0.946
FXR1	P22234	P22234	PAICS ADE2 AIRC PAIS	Multifunctional protein ADE2 [Includes: Phosphoribosylaminoimidazole-succinocarboxamide synthase (EC 6.3.2.6) (SAICAR synthetase); Phosphoribosylaminoimidazole carboxylase (EC 4.1.1.21) (AIR carboxylase) (AIRC)]	reviewed	425	12	0.994
FXR1	P31939	P31939	ATIC PURH OK/SW-cl.86	Bifunctional purine biosynthesis protein PURH [Includes: Phosphoribosylaminoimidazolecarboxamide formyltransferase (EC 2.1.2.3) (5-aminoimidazole-4-carboxamide ribonucleotide formyltransferase) (AICAR transformylase); IMP cyclohydrolase (EC 3.5.4.10) (ATI	reviewed	592	5	0.942
FXR1	P30520	P30520	ADSS ADSS2	Adenylosuccinate synthetase isozyme 2 (AMPSase 2) (AdSS 2) (EC 6.3.4.4) (Adenylosuccinate synthetase, acidic isozyme) (Adenylosuccinate synthetase, liver isozyme) (L-type adenylosuccinate synthetase) (IMP--aspartate ligase 2)	reviewed	456	2	0.872
FXR1	Q15269	Q15269	PWP2 PWP2H	Periodic tryptophan protein 2 homolog	reviewed	919	3	0.902
FXR1	P11216	P11216	PYGB	Glycogen phosphorylase, brain form (EC 2.4.1.1)	reviewed	843	19	0.99
FXR1	P06737	P06737	PYGL	Glycogen phosphorylase, liver form (EC 2.4.1.1)	reviewed	847	7	0.97
FXR1	P27708	P27708	CAD	CAD protein [Includes: Glutamine-dependent carbamoyl-phosphate synthase (EC 6.3.5.5); Aspartate carbamoyltransferase (EC 2.1.3.2); Dihydroorotase (EC 3.5.2.3)]	reviewed	2225	23	0.996
FXR1	P61026	P61026	RAB10	Ras-related protein Rab-10	reviewed	200	7	0.984
FXR1	P61106	P61106	RAB14	Ras-related protein Rab-14	reviewed	215	5	0.966
FXR1	Q9H0U4	Q9H0U4	RAB1B	Ras-related protein Rab-1B	reviewed	201	6	0.978
FXR1	P61019	P61019	RAB2A RAB2	Ras-related protein Rab-2A	reviewed	212	2	0.918
FXR1	P51148	P51148	RAB5C RABL	Ras-related protein Rab-5C (L1880) (RAB5L)	reviewed	216	3	0.952
FXR1	P51149	P51149	RAB7A RAB7	Ras-related protein Rab-7a	reviewed	207	3	0.92
FXR1	P29373	P29373	CRABP2	Cellular retinoic acid-binding protein 2 (Cellular retinoic acid-binding protein II) (CRABP-II)	reviewed	138	13	0.996
FXR1	P15153	P15153	RAC2	Ras-related C3 botulinum toxin substrate 2 (GX) (Small G protein) (p21-Rac2)	reviewed	192	3	0.944
FXR1	P35241	P35241	RDX	Radixin	reviewed	583	9	0.968
FXR1	P46060	P46060	RANGAP1 KIAA1835 SD	Ran GTPase-activating protein 1 (RanGAP1)	reviewed	587	2	0.928
FXR1	P43487	P43487	RANBP1	Ran-specific GTPase-activating protein (Ran-binding protein 1) (RanBP1)	reviewed	201	3	0.936
FXR1	P61224	P61224	RAP1B OK/SW-cl.11	Ras-related protein Rap-1b (GTP-binding protein smg p21B)	reviewed	184	2	0.896
FXR1	Q09028	Q09028	RBBP4 RBAP48	Histone-binding protein RBBP4 (Chromatin assembly factor 1 subunit C) (CAF-1 subunit C) (Chromatin assembly factor I p48 subunit) (CAF-I 48 kDa subunit) (CAF-I p48) (Nucleosome-remodeling factor subunit RBAP48) (Retinoblastoma-binding protein 4) (RBBP-4)	reviewed	425	4	0.936
FXR1	A0AV96	A0AV96	RBM47	RNA-binding protein 47 (RNA-binding motif protein 47)	reviewed	593	3	0.914
FXR1	Q9Y5S9	Q9Y5S9	RBM8A RBM8 HSPC114 MDS014	RNA-binding protein 8A (Binder of OVCA1-1) (BOV-1) (RNA-binding motif protein 8A) (RNA-binding protein Y14) (Ribonucleoprotein RBM8A)	reviewed	174	2	0.902
FXR1	P38159	P38159	RBMX HNRPG RBMXP1	RNA-binding motif protein, X chromosome (Glycoprotein p43) (Heterogeneous nuclear ribonucleoprotein G) (hnRNP G) [Cleaved into: RNA-binding motif protein, X chromosome, N-terminally processed]	reviewed	391	21	1
FXR1	P18754	P18754	RCC1 CHC1	Regulator of chromosome condensation (Cell cycle regulatory protein) (Chromosome condensation protein 1)	reviewed	421	5	0.952
FXR1	Q9P258	Q9P258	RCC2 KIAA1470 TD60	Protein RCC2 (RCC1-like protein TD-60) (Telophase disk protein of 60 kDa)	reviewed	522	6	0.97
FXR1	Q92900	Q92900	UPF1 KIAA0221 RENT1	Regulator of nonsense transcripts 1 (EC 3.6.4.-) (ATP-dependent helicase RENT1) (Nonsense mRNA reducing factor 1) (NORF1) (Up-frameshift suppressor 1 homolog) (hUpf1)	reviewed	1129	15	0.986
FXR1	P13489	P13489	RNH1 PRI RNH	Ribonuclease inhibitor (Placental ribonuclease inhibitor) (Placental RNase inhibitor) (Ribonuclease/angiogenin inhibitor 1) (RAI)	reviewed	461	3	0.93
FXR1	J3QL51	P18621	RPL17	60S ribosomal protein L17 (60S ribosomal protein L23) (PD-1)	reviewed	184	18	0.998
FXR1	O76021	O76021	RSL1D1 CATX11 CSIG PBK1 L12	Ribosomal L1 domain-containing protein 1 (CATX-11) (Cellular senescence-inhibited gene protein) (Protein PBK1)	reviewed	490	3	0.914
FXR1	P51991	P51991	HNRNPA3 HNRPA3	Heterogeneous nuclear ribonucleoprotein A3 (hnRNP A3)	reviewed	378	23	0.996
FXR1	P04843	P04843	RPN1	Dolichyl-diphosphooligosaccharide--protein glycosyltransferase subunit 1 (EC 2.4.99.18) (Dolichyl-diphosphooligosaccharide--protein glycosyltransferase 67 kDa subunit) (Ribophorin I) (RPN-I) (Ribophorin-1)	reviewed	607	7	0.96
FXR1	P04844	P04844	RPN2	Dolichyl-diphosphooligosaccharide--protein glycosyltransferase subunit 2 (EC 2.4.99.18) (Dolichyl-diphosphooligosaccharide--protein glycosyltransferase 63 kDa subunit) (RIBIIR) (Ribophorin II) (RPN-II) (Ribophorin-2)	reviewed	631	2	0.912
FXR1	Q9Y2L1	Q9Y2L1	DIS3 KIAA1008 RRP44	Exosome complex exonuclease RRP44 (EC 3.1.13.-) (EC 3.1.26.-) (Protein DIS3 homolog) (Ribosomal RNA-processing protein 44)	reviewed	958	2	0.82
FXR1	P62847	P62847	RPS24	40S ribosomal protein S24	reviewed	133	10	0.776
FXR1	P08865	P08865	RPSA LAMBR LAMR1	40S ribosomal protein SA (37 kDa laminin receptor precursor) (37LRP) (37/67 kDa laminin receptor) (LRP/LR) (67 kDa laminin receptor) (67LR) (Colon carcinoma laminin-binding protein) (Laminin receptor 1) (LamR) (Laminin-binding protein precursor p40) (LBP/	reviewed	295	13	0.998
FXR1	Q9Y3I0	Q9Y3I0	RTCB C22orf28 HSPC117	tRNA-splicing ligase RtcB homolog (EC 6.5.1.3)	reviewed	505	7	0.964
FXR1	P09661	P09661	SNRPA1	U2 small nuclear ribonucleoprotein A' (U2 snRNP A')	reviewed	255	4	0.96
FXR1	Q9Y265	Q9Y265	RUVBL1 INO80H NMP238 TIP49 TIP49A	RuvB-like 1 (EC 3.6.4.12) (49 kDa TATA box-binding protein-interacting protein) (49 kDa TBP-interacting protein) (54 kDa erythrocyte cytosolic protein) (ECP-54) (INO80 complex subunit H) (Nuclear matrix protein 238) (NMP 238) (Pontin 52) (TIP49a) (TIP60-a	reviewed	456	10	0.982
FXR1	P62304	P62304	SNRPE	Small nuclear ribonucleoprotein E (snRNP-E) (Sm protein E) (Sm-E) (SmE)	reviewed	92	3	0.946
FXR1	P62306	P62306	SNRPF PBSCF	Small nuclear ribonucleoprotein F (snRNP-F) (Sm protein F) (Sm-F) (SmF)	reviewed	86	2	0.94
FXR1	P06703	P06703	S100A6 CACY	Protein S100-A6 (Calcyclin) (Growth factor-inducible protein 2A9) (MLN 4) (Prolactin receptor-associated protein) (PRA) (S100 calcium-binding protein A6)	reviewed	90	6	0.97
FXR1	P60903	P60903	S100A10 ANX2LG CAL1L CLP11	Protein S100-A10 (Calpactin I light chain) (Calpactin-1 light chain) (Cellular ligand of annexin II) (S100 calcium-binding protein A10) (p10 protein) (p11)	reviewed	97	7	0.972
FXR1	P61619	P61619	SEC61A1 SEC61A	Protein transport protein Sec61 subunit alpha isoform 1 (Sec61 alpha-1)	reviewed	476	4	0.954
FXR1	P23526	P23526	AHCY SAHH	Adenosylhomocysteinase (AdoHcyase) (EC 3.3.1.1) (S-adenosyl-L-homocysteine hydrolase)	reviewed	432	23	0.998
FXR1	Q15020	Q15020	SART3 KIAA0156 TIP110	Squamous cell carcinoma antigen recognized by T-cells 3 (SART-3) (hSART-3) (Tat-interacting protein of 110 kDa) (Tip110)	reviewed	963	2	0.874
FXR1	Q15436	Q15436	SEC23A	Protein transport protein Sec23A (SEC23-related protein A)	reviewed	765	2	0.892
FXR1	Q15437	Q15437	SEC23B	Protein transport protein Sec23B (SEC23-related protein B)	reviewed	767	3	0.902
FXR1	Q9UPN6	Q9UPN6	SCAF8 CCAP7 KIAA1116 RBM16	Protein SCAF8 (CDC5L complex-associated protein 7) (RNA-binding motif protein 16) (SR-related and CTD-associated factor 8)	reviewed	1271	3	0.93
FXR1	Q15019	Q15019	SEPT2 DIFF6 KIAA0158 NEDD5	Septin-2 (Neural precursor cell expressed developmentally down-regulated protein 5) (NEDD-5)	reviewed	361	4	0.95
FXR1	Q9UHD8	Q9UHD8	SEPT9 KIAA0991 MSF	Septin-9 (MLL septin-like fusion protein MSF-A) (MLL septin-like fusion protein) (Ovarian/Breast septin) (Ov/Br septin) (Septin D1)	reviewed	586	5	0.96
FXR1	O43175	O43175	PHGDH PGDH3	D-3-phosphoglycerate dehydrogenase (3-PGDH) (EC 1.1.1.95)	reviewed	533	5	0.942
FXR1	Q5VXV2	Q01105	SET	Protein SET (HLA-DR-associated protein II) (Inhibitor of granzyme A-activated DNase) (IGAAD) (PHAPII) (Phosphatase 2A inhibitor I2PP2A) (I-2PP2A) (Template-activating factor I) (TAF-I)	reviewed	290	4	0.928
FXR1	Q12874	Q12874	SF3A3 SAP61	Splicing factor 3A subunit 3 (SF3a60) (Spliceosome-associated protein 61) (SAP 61)	reviewed	501	2	0.866
FXR1	Q13435	Q13435	SF3B2 SAP145	Splicing factor 3B subunit 2 (Pre-mRNA-splicing factor SF3b 145 kDa subunit) (SF3b145) (SF3b150) (Spliceosome-associated protein 145) (SAP 145)	reviewed	895	3	0.918
FXR1	Q96B97	Q96B97	SH3KBP1 CIN85	SH3 domain-containing kinase-binding protein 1 (CD2-binding protein 3) (CD2BP3) (Cbl-interacting protein of 85 kDa) (Human Src family kinase-binding protein 1) (HSB-1)	reviewed	665	2	0.882
FXR1	P42285	P42285	SKIV2L2 KIAA0052 Mtr4	Superkiller viralicidic activity 2-like 2 (EC 3.6.4.13) (ATP-dependent helicase SKIV2L2)	reviewed	1042	3	0.928
FXR1	P63208	P63208	SKP1 EMC19 OCP2 SKP1A TCEB1L	S-phase kinase-associated protein 1 (Cyclin-A/CDK2-associated protein p19) (Organ of Corti protein 2) (OCP-2) (Organ of Corti protein II) (OCP-II) (RNA polymerase II elongation factor-like protein) (SIII) (Transcription elongation factor B) (p19A) (p19skp	reviewed	163	3	0.952
FXR1	Q14683	Q14683	SMC1A DXS423E KIAA0178 SB1.8 SMC1 SMC1L1	Structural maintenance of chromosomes protein 1A (SMC protein 1A) (SMC-1-alpha) (SMC-1A) (Sb1.8)	reviewed	1233	5	0.958
FXR1	O95347	O95347	SMC2 CAPE SMC2L1 PRO0324	Structural maintenance of chromosomes protein 2 (SMC protein 2) (SMC-2) (Chromosome-associated protein E) (hCAP-E) (XCAP-E homolog)	reviewed	1197	3	0.906
FXR1	Q9UQE7	Q9UQE7	SMC3 BAM BMH CSPG6 SMC3L1	Structural maintenance of chromosomes protein 3 (SMC protein 3) (SMC-3) (Basement membrane-associated chondroitin proteoglycan) (Bamacan) (Chondroitin sulfate proteoglycan 6) (Chromosome-associated polypeptide) (hCAP)	reviewed	1217	2	0.82
FXR1	Q9NTJ3	Q9NTJ3	SMC4 CAPC SMC4L1	Structural maintenance of chromosomes protein 4 (SMC protein 4) (SMC-4) (Chromosome-associated polypeptide C) (hCAP-C) (XCAP-C homolog)	reviewed	1288	2	0.768
FXR1	O60264	O60264	SMARCA5 SNF2H WCRF135	SWI/SNF-related matrix-associated actin-dependent regulator of chromatin subfamily A member 5 (SWI/SNF-related matrix-associated actin-dependent regulator of chromatin A5) (EC 3.6.4.-) (Sucrose nonfermenting protein 2 homolog) (hSNF2H)	reviewed	1052	8	0.964
FXR1	A6NHR9	A6NHR9	SMCHD1 KIAA0650	Structural maintenance of chromosomes flexible hinge domain-containing protein 1 (SMC hinge domain-containing protein 1)	reviewed	2005	2	0.904
[truncated: 194 more rows]

## Sheet: Overlap
Saint Bait	Prey	Entry_Database	Gene names	Protein names	Status	Length	FXR1_KATOIII_Total Spec	FXR1_KATOIII_Max SAINT	FXR1_H358_Total Spec	FXR1_H358_Max SAINT
[truncated: 297 more rows]

[truncated: 2 more sheets: Unique_KATOIII, Unique_H358]
