# Supplementary material for: FXR1 regulates transcription and is required for growth of human cancer cells with TP53/FXR2 homozygous deletion
Source: eLife journal article supplement (doi:10.7554/elife.26129), 2017-08-02
Supplement: supp [file elife-26129-supp-v2.zip › elife_poa_e26129_Supplementary_File_2.xlsx]

## Sheet: t2t_8824847C3D101393374697561.t
Table S2: Function clustering of the FXR1 potential interacting proteins using the GO (gene ontology) and DAVID (The Database for Annotation, Visualization and Integrated Discovery) analysis.
Annotation Cluster 1	Enrichment Score: 12.134308406236164
Category	Term	Count	%	PValue	Genes	List Total	Pop Hits	Pop Total	Fold Enrichment	Bonferroni	Benjamini	FDR
GOTERM_CC_FAT	GO:0031981~nuclear lumen	76	26.3889	2.81048e-16	XPO1, NAA15, SYNCRIP, PDLIM1, SART3, IQGAP1, CTNNB1, FUBP1, EBNA1BP2, CSNK2A1, RBM8A, TOP2B, KPNB1, TOP2A, GNL3, TBL1XR1, MYO6, DDB1, FMR1, ACTN1, MCM2, MCM3, UBE2C, MCM4, RSL1D1, PPP1CA, NOP2, RCC2, RARS, IPO5, SMARCA5, SH3KBP1, FLII, RUVBL1, KPNA2, MYBBP1A, SNRPE, MATR3, LRPPRC, XRN2, FUS, HMGB1, HMGB2, MTDH, PRKDC, TRIM16, EXOSC10, SRRT, NUMA1, DDX46, BRIX1, NUDT21, NAT10, WDHD1, APEX1, NSUN2,…	247	1450	12782	2.71236	1.1291e-13	3.76366e-14	4.55191e-13
GOTERM_CC_FAT	GO:0070013~intracellular organelle lumen	82	28.4722	1.49356e-14	XPO1, NAA15, SYNCRIP, PDLIM1, SART3, IQGAP1, CTNNB1, FUBP1, EBNA1BP2, CSNK2A1, RBM8A, LRRC59, DHX30, TOP2B, KPNB1, TOP2A, GNL3, TBL1XR1, MYO6, DDB1, FMR1, ACTN1, MCM2, MCM3, UBE2C, MCM4, RSL1D1, PPP1CA, NOP2, C1QBP, RCC2, RARS, IPO5, SMARCA5, SH3KBP1, FLII, RUVBL1, KPNA2, MYBBP1A, SNRPE, MATR3, LRPPRC, XRN2, TUFM, FUS, HMGB1, HMGB2, MTDH, PRKDC, TRIM16, HADHB, EXOSC10, SRRT, NUMA1, DDX46, BRIX1, …	247	1779	12782	2.38528	5.08094e-12	1.27021e-12	2.04059e-11
GOTERM_CC_FAT	GO:0031974~membrane-enclosed lumen	83	28.8194	5.23569e-14	XPO1, NAA15, SYNCRIP, PDLIM1, SART3, IQGAP1, CTNNB1, FUBP1, EBNA1BP2, CSNK2A1, RBM8A, LRRC59, DHX30, TOP2B, KPNB1, TOP2A, GNL3, TBL1XR1, MYO6, DDB1, FMR1, ACTN1, MCM2, MCM3, UBE2C, MCM4, RSL1D1, PPP1CA, NOP2, C1QBP, RCC2, RARS, IPO5, SMARCA5, SH3KBP1, FLII, RUVBL1, KPNA2, MYBBP1A, SNRPE, MATR3, LRPPRC, XRN2, TUFM, FUS, HMGB1, HMGB2, MTDH, PRKDC, TRIM16, HADHB, EXOSC10, SRRT, NUMA1, DDX46, CACYBP,…	247	1856	12782	2.31421	1.77645e-11	3.55294e-12	7.13318e-11
GOTERM_CC_FAT	GO:0043233~organelle lumen	82	28.4722	5.37989e-14	XPO1, NAA15, SYNCRIP, PDLIM1, SART3, IQGAP1, CTNNB1, FUBP1, EBNA1BP2, CSNK2A1, RBM8A, LRRC59, DHX30, TOP2B, KPNB1, TOP2A, GNL3, TBL1XR1, MYO6, DDB1, FMR1, ACTN1, MCM2, MCM3, UBE2C, MCM4, RSL1D1, PPP1CA, NOP2, C1QBP, RCC2, RARS, IPO5, SMARCA5, SH3KBP1, FLII, RUVBL1, KPNA2, MYBBP1A, SNRPE, MATR3, LRPPRC, XRN2, TUFM, FUS, HMGB1, HMGB2, MTDH, PRKDC, TRIM16, HADHB, EXOSC10, SRRT, NUMA1, DDX46, BRIX1, …	247	1820	12782	2.33155	1.82537e-11	3.04223e-12	7.32969e-11
GOTERM_CC_FAT	GO:0005730~nucleolus	42	14.5833	1.22081e-10	FUS, HMGB1, XPO1, HMGB2, MTDH, IQGAP1, FUBP1, EXOSC10, EBNA1BP2, BRIX1, NAT10, WDHD1, TOP2B, TOP2A, NSUN2, GNL3, FMR1, ACTN1, HEATR1, ILF3, TRIM25, MCM3, STAT1, MCM4, PWP2, FXR1, RSL1D1, DIS3, NOP2, VCP, RCC2, RARS, NOP16, IPO5, SMARCA5, SH3KBP1, FLII, SPTBN1, WDR3, NOP56, MYBBP1A, XRN2	247	698	12782	3.11384	4.13853e-08	5.91219e-09	1.66174e-07
GOTERM_CC_FAT	GO:0005654~nucleoplasm	42	14.5833	1.08331e-07	HMGB1, XPO1, HMGB2, NAA15, PRKDC, SYNCRIP, TRIM16, PDLIM1, SART3, CTNNB1, SRRT, NUMA1, CSNK2A1, DDX46, RBM8A, NUDT21, WDHD1, TOP2B, KPNB1, TOP2A, APEX1, CHD4, DDX42, GNL3, GEMIN5, XPOT, SSRP1, TBL1XR1, MYO6, DDB1, FMR1, MCM2, MCM3, UBE2C, MCM4, SF3A3, PPP1CA, SMARCA5, RUVBL1, KPNA2, SNRPE, LRPPRC	247	882	12782	2.46424	3.67234e-05	2.82493e-06	0.000147458
Annotation Cluster 2	Enrichment Score: 11.973340990163143
Category	Term	Count	%	PValue	Genes	List Total	Pop Hits	Pop Total	Fold Enrichment	Bonferroni	Benjamini	FDR
GOTERM_CC_FAT	GO:0043228~non-membrane-bounded organelle	107	37.1528	2.78245e-16	XPO1, DYNC1LI2, VAPA, PDLIM7, PDLIM5, STOML2, PDLIM1, RANGAP1, CCT3, IQGAP1, CTNNB1, VCL, EBNA1BP2, CSNK2A1, LRRC59, H2AFY, DHX30, GNL3, MYO6, FMR1, UBR4, ACTN1, CTNNA1, NCAPD2, RSL1D1, NME2, NOP2, RCC2, RARS, PSMA3, SMARCA5, FLII, MYBBP1A, LRPPRC, XRN2, FUS, HMGB1, HMGB2, ALDOC, ARPC4, C14ORF166, RCC1, BANF1, CAPZB, HADHB, BRIX1, NAT10, WDHD1, RPSA, MYO1B, HEATR1, FXR1, CORO1C, VCP, LASP1, NOP16…	247	2596	12782	2.13295	1.1291e-13	5.63993e-14	4.55191e-13
GOTERM_CC_FAT	GO:0043232~intracellular non-membrane-bounded organelle	107	37.1528	2.78245e-16	XPO1, DYNC1LI2, VAPA, PDLIM7, PDLIM5, STOML2, PDLIM1, RANGAP1, CCT3, IQGAP1, CTNNB1, VCL, EBNA1BP2, CSNK2A1, LRRC59, H2AFY, DHX30, GNL3, MYO6, FMR1, UBR4, ACTN1, CTNNA1, NCAPD2, RSL1D1, NME2, NOP2, RCC2, RARS, PSMA3, SMARCA5, FLII, MYBBP1A, LRPPRC, XRN2, FUS, HMGB1, HMGB2, ALDOC, ARPC4, C14ORF166, RCC1, BANF1, CAPZB, HADHB, BRIX1, NAT10, WDHD1, RPSA, MYO1B, HEATR1, FXR1, CORO1C, VCP, LASP1, NOP16…	247	2596	12782	2.13295	1.1291e-13	5.63993e-14	4.55191e-13
GOTERM_CC_FAT	GO:0005856~cytoskeleton	50	17.3611	1.55283e-05	DYNC1LI2, TLN1, VAPA, PDLIM7, PDLIM5, HINT1, STOML2, PDLIM1, CCT3, IQGAP1, DSTN, CTNNB1, VCL, ACTR3, RANBP1, DYNC1H1, TOP2A, TBL1XR1, MYO6, UBR4, ACTN1, MCM3, CTNNA1, NME2, G6PD, RCC2, PSMA3, SH3KBP1, FLII, RUVBL1, LRPPRC, ALDOC, FHL2, C14ORF166, ARPC4, CAPZB, NUMA1, NUDT21, CNN2, APEX1, MYOF, PLEC, EPPK1, MYO1B, COTL1, SMC3, CORO1C, LASP1, SPTBN1, SPTAN1	247	1381	12782	1.87361	0.0052503	0.000292409	0.0211348
Annotation Cluster 3	Enrichment Score: 9.308668765924592
Category	Term	Count	%	PValue	Genes	List Total	Pop Hits	Pop Total	Fold Enrichment	Bonferroni	Benjamini	FDR
GOTERM_BP_FAT	GO:0006396~RNA processing	40	13.8889	3.54979e-13	FUS, TRA2B, U2AF2, PABPC4, TRA2A, SYNCRIP, SART3, YBX1, SF3B2, EXOSC10, SRRT, DDX17, DDX46, RBM8A, PCBP2, NUDT21, DHX16, MAGOHB, PABPC1, NSUN2, GEMIN5, SNRPA1, SF3B14, EFTUD2, DDX1, RPL26, HEATR1, PRPF6, SF3A3, RSL1D1, DIS3, NOP2, ESRP1, WDR3, NOP56, PHF5A, SMC1A, SNRPE, XRN2, PUF60	252	547	13528	3.9256	4.62485e-10	4.62485e-10	5.79692e-10
GOTERM_BP_FAT	GO:0016071~mRNA metabolic process	32	11.1111	1.86191e-12	FUS, TRA2B, U2AF2, TRA2A, SYNCRIP, YBX1, SF3B2, EXOSC10, DDX46, RBM8A, PCBP2, NUDT21, MAGOHB, DHX16, PABPC1, GEMIN5, SNRPA1, UPF1, SF3B14, EFTUD2, DDX1, ELAVL1, PRPF6, SF3A3, GSPT1, SERBP1, ESRP1, PHF5A, SMC1A, SNRPE, XRN2, PUF60	252	370	13528	4.64281	2.42613e-09	1.21306e-09	3.041e-09
GOTERM_BP_FAT	GO:0008380~RNA splicing	26	9.02778	1.04308e-10	FUS, U2AF2, TRA2B, TRA2A, SYNCRIP, YBX1, SF3B2, DDX46, RBM8A, NUDT21, PCBP2, MAGOHB, DHX16, PABPC1, GEMIN5, SNRPA1, SF3B14, EFTUD2, DDX1, SF3A3, PRPF6, ESRP1, PHF5A, SMC1A, SNRPE, PUF60	252	284	13528	4.9146	1.35913e-07	4.53043e-08	1.70358e-07
GOTERM_BP_FAT	GO:0006397~mRNA processing	27	9.375	2.70356e-10	FUS, U2AF2, TRA2B, TRA2A, SYNCRIP, YBX1, SF3B2, DDX46, RBM8A, PCBP2, NUDT21, MAGOHB, DHX16, PABPC1, GEMIN5, SNRPA1, SF3B14, EFTUD2, DDX1, SF3A3, PRPF6, ESRP1, PHF5A, SMC1A, SNRPE, PUF60, XRN2	252	321	13528	4.51535	3.52273e-07	5.03248e-08	4.41553e-07
GOTERM_BP_FAT	GO:0000398~nuclear mRNA splicing, via spliceosome	19	6.59722	4.62155e-10	FUS, SNRPA1, SF3B14, EFTUD2, U2AF2, TRA2B, TRA2A, DDX1, YBX1, PRPF6, SF3B2, SF3A3, RBM8A, PCBP2, NUDT21, PHF5A, SMC1A, SNRPE, GEMIN5	252	153	13528	6.66646	6.02187e-07	6.02187e-08	7.54806e-07
GOTERM_BP_FAT	GO:0000377~RNA splicing, via transesterification reactions with bulged adenosine as nucleophile	19	6.59722	4.62155e-10	FUS, SNRPA1, SF3B14, EFTUD2, U2AF2, TRA2B, TRA2A, DDX1, YBX1, PRPF6, SF3B2, SF3A3, RBM8A, PCBP2, NUDT21, PHF5A, SMC1A, SNRPE, GEMIN5	252	153	13528	6.66646	6.02187e-07	6.02187e-08	7.54806e-07
GOTERM_BP_FAT	GO:0000375~RNA splicing, via transesterification reactions	19	6.59722	4.62155e-10	FUS, SNRPA1, SF3B14, EFTUD2, U2AF2, TRA2B, TRA2A, DDX1, YBX1, PRPF6, SF3B2, SF3A3, RBM8A, PCBP2, NUDT21, PHF5A, SMC1A, SNRPE, GEMIN5	252	153	13528	6.66646	6.02187e-07	6.02187e-08	7.54806e-07
KEGG_PATHWAY	hsa03040:Spliceosome	17	5.90278	1.89491e-08	SNRPA1, SF3B14, EFTUD2, U2AF2, TRA2B, TRA2A, PRPF6, SF3B2, SF3A3, DDX46, RBM8A, DHX16, MAGOHB, PHF5A, SNRPE, PUF60, DDX42	118	126	5085	5.81416	1.80016e-06	1.80016e-06	2.0829e-05
GOTERM_CC_FAT	GO:0005681~spliceosome	12	4.16667	4.7821e-05	SNRPA1, RBM8A, U2AF2, EFTUD2, SYNCRIP, PHF5A, PABPC1, SNRPE, PRPF6, SF3B2, GEMIN5, SF3A3	247	132	12782	4.70445	0.016081	0.000810256	0.0650735
Annotation Cluster 4	Enrichment Score: 5.98295208192879
Category	Term	Count	%	PValue	Genes	List Total	Pop Hits	Pop Total	Fold Enrichment	Bonferroni	Benjamini	FDR
GOTERM_MF_FAT	GO:0008565~protein transporter activity	16	5.55556	8.82832e-11	XPO1, AP1G1, XPO5, AP3S1, AP2B1, CSE1L, IPO7, IPO4, IPO5, AP3D1, XPO7, KPNA2, KPNB1, TNPO1, SEC61A1, AP3B1	250	87	12983	9.55071	3.67258e-08	1.22419e-08	1.23841e-07
GOTERM_BP_FAT	GO:0034613~cellular protein localization	31	10.7639	1.36121e-10	XPO1, COPA, SRP14, XPO5, AP1G1, COPZ1, EIF5A, AP3S1, CTNNB1, CDC42, AP2B1, CSE1L, COPB1, AP3D1, TNPO1, KPNB1, SEC61A1, AP3B1, SEC23A, MYO6, VCP, IPO7, NUP205, IPO4, ARCN1, IPO5, SPTBN1, SRP72, XPO7, SSR4, KPNA2	252	411	13528	4.04905	1.77366e-07	4.43415e-08	2.22318e-07
GOTERM_BP_FAT	GO:0070727~cellular macromolecule localization	31	10.7639	1.621e-10	XPO1, COPA, SRP14, XPO5, AP1G1, COPZ1, EIF5A, AP3S1, CTNNB1, CDC42, AP2B1, CSE1L, COPB1, AP3D1, TNPO1, KPNB1, SEC61A1, AP3B1, SEC23A, MYO6, VCP, IPO7, NUP205, IPO4, ARCN1, IPO5, SPTBN1, SRP72, XPO7, SSR4, KPNA2	252	414	13528	4.01971	2.11216e-07	4.22432e-08	2.64746e-07
GOTERM_BP_FAT	GO:0000059~protein import into nucleus, docking	9	3.125	2.64456e-10	XPO1, CSE1L, IPO7, IPO4, NUP205, IPO5, XPO7, KPNB1, TNPO1	252	17	13528	28.4202	3.44586e-07	5.7431e-08	4.31917e-07
GOTERM_BP_FAT	GO:0006886~intracellular protein transport	29	10.0694	3.3023e-10	XPO1, COPA, SRP14, XPO5, AP1G1, COPZ1, EIF5A, AP3S1, AP2B1, CSE1L, COPB1, AP3D1, TNPO1, KPNB1, SEC61A1, AP3B1, SEC23A, MYO6, VCP, IPO7, NUP205, IPO4, ARCN1, IPO5, SPTBN1, SRP72, XPO7, SSR4, KPNA2	252	374	13528	4.16255	4.3029e-07	5.37862e-08	5.39342e-07
GOTERM_BP_FAT	GO:0046907~intracellular transport	39	13.5417	3.71168e-10	COPA, XPO1, SRP14, SEC31A, AP1G1, XPO5, COPZ1, AP3S1, EIF5A, AP2B1, CSE1L, COPB1, ANP32A, AP3D1, VPS35, RANBP1, TNPO1, KPNB1, SEC61A1, AP3B1, SEC23A, RAB2A, XPOT, MYO6, UPF1, NUP155, VCP, IPO7, IPO4, NUP205, ARCN1, IPO5, SPTBN1, SRP72, XPO7, SSR4, KPNA2, MYBBP1A, LRPPRC	252	657	13528	3.18663	4.83632e-07	5.37369e-08	6.06204e-07
GOTERM_CC_FAT	GO:0005643~nuclear pore	14	4.86111	3.09668e-09	XPOT, XPO1, EIF5A, RANGAP1, NUP155, CSE1L, IPO7, IPO4, NUP205, IPO5, XPO7, KPNA2, KPNB1, TNPO1	247	79	12782	9.17071	1.04977e-06	1.16641e-07	4.21515e-06
GOTERM_BP_FAT	GO:0008104~protein localization	44	15.2778	4.46751e-09	RAB7A, COPA, XPO1, SRP14, TLN1, NACA, SEC31A, RAB5C, AP1G1, XPO5, ALG2, COPZ1, AP3S1, EIF5A, ARF6, ARF5, CTNNB1, CDC42, AP2B1, CSE1L, COPB1, AP3D1, VPS35, TNPO1, KPNB1, SEC61A1, AP3B1, SEC23A, RAB2A, MYO6, NUP155, VCP, IPO7, IPO4, ARF3, NUP205, ARF4, ARCN1, IPO5, SPTBN1, SRP72, XPO7, SSR4, KPNA2	252	882	13528	2.67804	5.82114e-06	5.29196e-07	7.29647e-06
GOTERM_BP_FAT	GO:0006913~nucleocytoplasmic transport	18	6.25	4.67708e-09	XPOT, XPO1, UPF1, XPO5, EIF5A, NUP155, CSE1L, IPO7, IPO4, NUP205, IPO5, ANP32A, SPTBN1, XPO7, KPNA2, KPNB1, MYBBP1A, TNPO1	252	156	13528	6.19414	6.09422e-06	5.07853e-07	7.63876e-06
GOTERM_BP_FAT	GO:0051169~nuclear transport	18	6.25	5.68639e-09	XPOT, XPO1, UPF1, XPO5, EIF5A, NUP155, CSE1L, IPO7, IPO4, NUP205, IPO5, ANP32A, SPTBN1, XPO7, KPNA2, KPNB1, MYBBP1A, TNPO1	252	158	13528	6.11573	7.40934e-06	5.69951e-07	9.28719e-06
GOTERM_BP_FAT	GO:0015031~protein transport	40	13.8889	6.93027e-09	RAB7A, XPO1, COPA, SRP14, NACA, SEC31A, RAB5C, AP1G1, XPO5, COPZ1, AP3S1, EIF5A, ARF6, ARF5, AP2B1, CSE1L, COPB1, AP3D1, VPS35, TNPO1, KPNB1, SEC61A1, AP3B1, RAB2A, SEC23A, MYO6, NUP155, VCP, IPO7, IPO4, ARF3, NUP205, ARF4, ARCN1, IPO5, SPTBN1, SRP72, XPO7, SSR4, KPNA2	252	762	13528	2.81798	9.03011e-06	6.4501e-07	1.13187e-05
GOTERM_BP_FAT	GO:0045184~establishment of protein localization	40	13.8889	8.9289e-09	RAB7A, XPO1, COPA, SRP14, NACA, SEC31A, RAB5C, AP1G1, XPO5, COPZ1, AP3S1, EIF5A, ARF6, ARF5, AP2B1, CSE1L, COPB1, AP3D1, VPS35, TNPO1, KPNB1, SEC61A1, AP3B1, RAB2A, SEC23A, MYO6, NUP155, VCP, IPO7, IPO4, ARF3, NUP205, ARF4, ARCN1, IPO5, SPTBN1, SRP72, XPO7, SSR4, KPNA2	252	769	13528	2.79233	1.16343e-05	7.75624e-07	1.4583e-05
GOTERM_CC_FAT	GO:0005635~nuclear envelope	20	6.94444	1.52275e-08	XPOT, XPO1, MTDH, MYO6, EIF5A, RANGAP1, NUP155, CSE1L, IPO7, IPO4, NUP205, IPO5, CACYBP, XPO7, KPNA2, KPNB1, TNPO1, MYOF, MATR3, LRPPRC	247	205	12782	5.04868	5.16212e-06	5.16213e-07	2.07275e-05
GOTERM_CC_FAT	GO:0046930~pore complex	14	4.86111	3.11647e-08	XPOT, XPO1, EIF5A, RANGAP1, NUP155, CSE1L, IPO7, IPO4, NUP205, IPO5, XPO7, KPNA2, KPNB1, TNPO1	247	95	12782	7.62617	1.05648e-05	9.60438e-07	4.24209e-05
GOTERM_BP_FAT	GO:0006605~protein targeting	18	6.25	5.30627e-07	XPO1, SRP14, MYO6, XPO5, EIF5A, CSE1L, IPO7, IPO4, NUP205, IPO5, SPTBN1, SRP72, XPO7, KPNA2, KPNB1, TNPO1, SEC61A1, AP3B1	252	215	13528	4.49435	0.000691168	2.88082e-05	0.000866633
GOTERM_BP_FAT	GO:0034621~cellular macromolecular complex subunit organization	23	7.98611	8.5155e-07	XPO1, HMGB2, HP1BP3, DDX1, ARPC4, MCM2, PRPF6, SF3A3, DSTN, EIF3A, CSE1L, IPO7, IPO4, NUP205, IPO5, SMARCA5, H2AFY, XPO7, TNPO1, SNRPE, KPNB1, XRN2, GEMIN5	252	357	13528	3.45854	0.00110896	4.10944e-05	0.00139077
GOTERM_BP_FAT	GO:0034622~cellular macromolecular complex assembly	21	7.29167	2.00059e-06	XPO1, HMGB2, HP1BP3, DDX1, ARPC4, MCM2, PRPF6, SF3A3, EIF3A, CSE1L, IPO7, IPO4, NUP205, IPO5, SMARCA5, H2AFY, XPO7, SNRPE, KPNB1, TNPO1, GEMIN5	252	318	13528	3.54507	0.00260338	8.40858e-05	0.00326737
GOTERM_BP_FAT	GO:0033365~protein localization in organelle	14	4.86111	3.21815e-06	XPO1, SRP14, CSE1L, IPO7, IPO4, NUP205, IPO5, SPTBN1, SRP72, XPO7, KPNB1, TNPO1, KPNA2, SEC61A1	252	146	13528	5.14764	0.00418448	0.000123323	0.00525585
GOTERM_BP_FAT	GO:0006606~protein import into nucleus	11	3.81944	4.15314e-06	XPO1, CSE1L, IPO7, IPO4, NUP205, IPO5, SPTBN1, XPO7, KPNA2, KPNB1, TNPO1	252	86	13528	6.86637	0.00539693	0.000150309	0.00678282
GOTERM_BP_FAT	GO:0051170~nuclear import	11	3.81944	5.12498e-06	XPO1, CSE1L, IPO7, IPO4, NUP205, IPO5, SPTBN1, XPO7, KPNA2, KPNB1, TNPO1	252	88	13528	6.71032	0.00665561	0.000180466	0.00836994
GOTERM_BP_FAT	GO:0034504~protein localization in nucleus	11	3.81944	9.31335e-06	XPO1, CSE1L, IPO7, IPO4, NUP205, IPO5, SPTBN1, XPO7, KPNA2, KPNB1, TNPO1	252	94	13528	6.282	0.012062	0.000311115	0.0152098
GOTERM_CC_FAT	GO:0012505~endomembrane system	32	11.1111	0.000100718	XPO1, COPA, MTDH, SEC31A, VAPA, AP1G1, COPZ1, EIF5A, RANGAP1, ACTR3, AP2B1, CSE1L, COPB1, CACYBP, TNPO1, MYOF, KPNB1, SEC61A1, XPOT, SEC23A, MYO6, NUP155, IPO7, NUP205, IPO4, IPO5, ARCN1, XPO7, SSR4, KPNA2, MATR3, LRPPRC	247	782	12782	2.11761	0.0335686	0.00155084	0.137008
GOTERM_BP_FAT	GO:0043933~macromolecular complex subunit organization	29	10.0694	0.00013412	XPO1, HMGB2, HP1BP3, ALDOC, ARPC4, CTNNB1, DSTN, EIF3A, CSE1L, H2AFY, KPNB1, TNPO1, GEMIN5, PFKL, DDX1, PFKM, MCM2, PRPF6, SF3A3, VCP, GTF2I, IPO7, NUP205, IPO4, IPO5, SMARCA5, XPO7, SNRPE, XRN2	252	710	13528	2.19267	0.16035	0.00335531	0.218823
GOTERM_CC_FAT	GO:0031967~organelle envelope	27	9.375	0.000157252	XPO1, MTDH, CHCHD3, STOML2, EIF5A, RANGAP1, ALDH3A2, HADHB, CSE1L, CACYBP, CSDE1, ACSL3, MYOF, KPNB1, TNPO1, XPOT, MYO6, IMMT, NUP155, IPO7, NUP205, IPO4, IPO5, XPO7, KPNA2, LRPPRC, MATR3	247	620	12782	2.25358	0.0519166	0.0022189	0.213838
GOTERM_BP_FAT	GO:0017038~protein import	11	3.81944	0.000163213	XPO1, CSE1L, IPO7, IPO4, NUP205, IPO5, SPTBN1, XPO7, KPNA2, KPNB1, TNPO1	252	131	13528	4.50769	0.191589	0.00400487	0.266232
GOTERM_CC_FAT	GO:0031975~envelope	27	9.375	0.000166749	XPO1, MTDH, CHCHD3, STOML2, EIF5A, RANGAP1, ALDH3A2, HADHB, CSE1L, CACYBP, CSDE1, ACSL3, MYOF, KPNB1, TNPO1, XPOT, MYO6, IMMT, NUP155, IPO7, NUP205, IPO4, IPO5, XPO7, KPNA2, LRPPRC, MATR3	247	622	12782	2.24634	0.0549644	0.00225875	0.226738
GOTERM_BP_FAT	GO:0065003~macromolecular complex assembly	27	9.375	0.00026924	XPO1, HMGB2, HP1BP3, ALDOC, ARPC4, CTNNB1, EIF3A, CSE1L, H2AFY, KPNB1, TNPO1, GEMIN5, PFKL, DDX1, PFKM, MCM2, SF3A3, PRPF6, VCP, GTF2I, IPO7, NUP205, IPO4, IPO5, SMARCA5, XPO7, SNRPE	252	665	13528	2.17959	0.295922	0.00592924	0.438824
GOTERM_BP_FAT	GO:0043623~cellular protein complex assembly	10	3.47222	0.00325665	XPO1, CSE1L, IPO7, IPO4, NUP205, IPO5, ARPC4, XPO7, KPNB1, TNPO1	252	162	13528	3.31374	0.985741	0.0487743	5.18811
GOTERM_BP_FAT	GO:0006461~protein complex assembly	18	6.25	0.0132698	XPO1, PFKL, ALDOC, ARPC4, PFKM, CTNNB1, CSE1L, VCP, GTF2I, IPO7, IPO4, NUP205, IPO5, SMARCA5, XPO7, KPNB1, TNPO1, GEMIN5	252	505	13528	1.91344	1	0.140461	19.6018
GOTERM_BP_FAT	GO:0070271~protein complex biogenesis	18	6.25	0.0132698	XPO1, PFKL, ALDOC, ARPC4, PFKM, CTNNB1, CSE1L, VCP, GTF2I, IPO7, IPO4, NUP205, IPO5, SMARCA5, XPO7, KPNB1, TNPO1, GEMIN5	252	505	13528	1.91344	1	0.140461	19.6018
GOTERM_CC_FAT	GO:0031224~intrinsic to membrane	30	10.4167	1	XPO1, MTDH, VAPA, RAB5C, ALG2, ITGB4, EIF5A, RANGAP1, ESYT1, ALDH3A2, CSE1L, LRRC59, TNPO1, ACSL3, MYOF, KPNB1, SEC61A1, XPOT, RAB2A, IMMT, UBR4, NUP155, EPHA2, IPO7, NUP205, IPO4, IPO5, SSR4, XPO7, KPNA2	247	5485	12782	0.283039	1	1	100
GOTERM_CC_FAT	GO:0016021~integral to membrane	28	9.72222	1	XPO1, MTDH, VAPA, ALG2, ITGB4, EIF5A, RANGAP1, ESYT1, ALDH3A2, CSE1L, LRRC59, ACSL3, MYOF, KPNB1, TNPO1, SEC61A1, XPOT, IMMT, UBR4, NUP155, EPHA2, IPO7, NUP205, IPO4, IPO5, SSR4, XPO7, KPNA2	247	5297	12782	0.273546	1	1	100
Annotation Cluster 5	Enrichment Score: 5.2522824710947065
Category	Term	Count	%	PValue	Genes	List Total	Pop Hits	Pop Total	Fold Enrichment	Bonferroni	Benjamini	FDR
GOTERM_MF_FAT	GO:0008135~translation factor activity, nucleic acid binding	14	4.86111	4.3931e-08	TUFM, EIF5A, GCN1L1, EIF4G1, EIF3D, EIF3CL, EIF4G2, EIF3A, EIF4E, EIF3G, GSPT1, EIF2S2, EIF3F, EEF1D	250	98	12983	7.41886	1.82751e-05	4.56882e-06	6.16249e-05
GOTERM_BP_FAT	GO:0006412~translation	23	7.98611	2.35909e-07	TUFM, RPSA, NACA, AIMP1, PABPC4, RPL26, EIF5A, EIF4G1, RSL1D1, IARS, EIF3D, EIF3CL, EIF4G2, EIF3A, EIF4E, GSPT1, EIF3G, EEF1E1, RARS, EIF3F, EIF2S2, FARSB, EEF1D	252	331	13528	3.73021	0.000307342	1.80816e-05	0.000385293
GOTERM_MF_FAT	GO:0003743~translation initiation factor activity	9	3.125	2.00253e-05	EIF4G1, EIF3D, EIF4G2, EIF3CL, EIF3A, EIF4E, EIF3G, EIF3F, EIF2S2	250	61	12983	7.6621	0.00829602	0.000832716	0.0280872
GOTERM_CC_FAT	GO:0005852~eukaryotic translation initiation factor 3 complex	5	1.73611	0.000154639	EIF3D, EIF3CL, EIF3A, EIF3G, EIF3F	247	15	12782	17.2497	0.0510761	0.00227682	0.210287
GOTERM_BP_FAT	GO:0006413~translational initiation	7	2.43056	0.000170676	EIF3D, EIF3CL, EIF3A, EIF4E, EIF3G, EIF3F, EIF2S2	252	45	13528	8.35062	0.199413	0.00411024	0.278389
Annotation Cluster 6	Enrichment Score: 4.817046297149769
Category	Term	Count	%	PValue	Genes	List Total	Pop Hits	Pop Total	Fold Enrichment	Bonferroni	Benjamini	FDR
GOTERM_MF_FAT	GO:0000166~nucleotide binding	86	29.8611	7.03776e-11	DYNC1LI2, RAB5C, U2AF2, SYNCRIP, CCT3, SART3, ACTR3, CDC42, DDX17, CSNK2A1, RBM8A, TIA1, DYNC1H1, DHX30, TOP2B, TOP2A, GNL3, ABCE1, MYO6, PFKL, SF3B14, EFTUD2, G3BP1, CCT6A, PFKM, MCM2, MCM3, UBE2C, MCM4, NME2, G6PD, RARS, UBE2M, FARSB, ESRP1, SMARCA5, TXNRD1, RUVBL1, MATR3, FUS, TUFM, ADSS, RAB7A, SORD, TRA2B, PABPC4, TRA2A, HDGF, PRKDC, ARF6, ARF5, HADHB, IARS, DDX46, EIF3G, DHX16, NAT10, PABPC…	250	2245	12983	1.98938	2.92771e-08	1.46385e-08	9.87232e-08
GOTERM_MF_FAT	GO:0032553~ribonucleotide binding	63	21.875	3.87547e-06	DYNC1LI2, RAB5C, CCT3, ACTR3, CDC42, DDX17, CSNK2A1, DYNC1H1, DHX30, TOP2B, TOP2A, GNL3, ABCE1, MYO6, PFKL, EFTUD2, G3BP1, CCT6A, PFKM, MCM2, MCM3, UBE2C, MCM4, NME2, RARS, UBE2M, SMARCA5, FARSB, RUVBL1, TUFM, ADSS, RAB7A, PRKDC, ARF6, ARF5, IARS, DDX46, DHX16, NAT10, ACSL3, CHD4, DDX42, RAB2A, MSH6, UPF1, MSH2, MYO1B, DDX1, ACLY, SMC2, SMC3, EPHA2, GART, SMC4, DDX6, CCT7, PSMC6, GSPT1, VCP, ARF3…	250	1836	12983	1.78198	0.0016109	0.000322388	0.00543624
GOTERM_MF_FAT	GO:0032555~purine ribonucleotide binding	63	21.875	3.87547e-06	DYNC1LI2, RAB5C, CCT3, ACTR3, CDC42, DDX17, CSNK2A1, DYNC1H1, DHX30, TOP2B, TOP2A, GNL3, ABCE1, MYO6, PFKL, EFTUD2, G3BP1, CCT6A, PFKM, MCM2, MCM3, UBE2C, MCM4, NME2, RARS, UBE2M, SMARCA5, FARSB, RUVBL1, TUFM, ADSS, RAB7A, PRKDC, ARF6, ARF5, IARS, DDX46, DHX16, NAT10, ACSL3, CHD4, DDX42, RAB2A, MSH6, UPF1, MSH2, MYO1B, DDX1, ACLY, SMC2, SMC3, EPHA2, GART, SMC4, DDX6, CCT7, PSMC6, GSPT1, VCP, ARF3…	250	1836	12983	1.78198	0.0016109	0.000322388	0.00543624
GOTERM_MF_FAT	GO:0017076~purine nucleotide binding	64	22.2222	7.87389e-06	DYNC1LI2, RAB5C, CCT3, ACTR3, CDC42, DDX17, CSNK2A1, DYNC1H1, DHX30, TOP2B, TOP2A, GNL3, ABCE1, MYO6, PFKL, EFTUD2, G3BP1, CCT6A, PFKM, MCM2, MCM3, UBE2C, MCM4, NME2, RARS, UBE2M, SMARCA5, FARSB, TXNRD1, RUVBL1, TUFM, ADSS, RAB7A, PRKDC, ARF6, ARF5, IARS, DDX46, DHX16, NAT10, ACSL3, CHD4, DDX42, RAB2A, MSH6, UPF1, MSH2, MYO1B, DDX1, ACLY, SMC2, SMC3, EPHA2, GART, SMC4, DDX6, CCT7, PSMC6, GSPT1, V…	250	1918	12983	1.73287	0.00327019	0.000467826	0.0110446
GOTERM_MF_FAT	GO:0005524~ATP binding	49	17.0139	0.000162399	DYNC1LI2, CCT3, ACTR3, DDX17, CSNK2A1, TOP2B, DHX30, DYNC1H1, TOP2A, ABCE1, MYO6, PFKL, G3BP1, MCM2, PFKM, CCT6A, MCM3, UBE2C, MCM4, NME2, RARS, UBE2M, SMARCA5, FARSB, RUVBL1, PRKDC, IARS, DDX46, DHX16, NAT10, ACSL3, CHD4, DDX42, MSH6, UPF1, MYO1B, MSH2, DDX1, ACLY, SMC2, EPHA2, SMC3, GART, SMC4, DDX6, CCT7, PSMC6, VCP, SMC1A	250	1477	12983	1.72286	0.0653317	0.00481434	0.227567
GOTERM_MF_FAT	GO:0032559~adenyl ribonucleotide binding	49	17.0139	0.000223384	DYNC1LI2, CCT3, ACTR3, DDX17, CSNK2A1, TOP2B, DHX30, DYNC1H1, TOP2A, ABCE1, MYO6, PFKL, G3BP1, MCM2, PFKM, CCT6A, MCM3, UBE2C, MCM4, NME2, RARS, UBE2M, SMARCA5, FARSB, RUVBL1, PRKDC, IARS, DDX46, DHX16, NAT10, ACSL3, CHD4, DDX42, MSH6, UPF1, MYO1B, MSH2, DDX1, ACLY, SMC2, EPHA2, SMC3, GART, SMC4, DDX6, CCT7, PSMC6, VCP, SMC1A	250	1497	12983	1.69985	0.0887503	0.00579181	0.3129
GOTERM_MF_FAT	GO:0030554~adenyl nucleotide binding	50	17.3611	0.00039782	DYNC1LI2, CCT3, ACTR3, DDX17, CSNK2A1, TOP2B, DHX30, DYNC1H1, TOP2A, ABCE1, MYO6, PFKL, G3BP1, MCM2, PFKM, CCT6A, MCM3, UBE2C, MCM4, NME2, RARS, UBE2M, SMARCA5, FARSB, TXNRD1, RUVBL1, PRKDC, IARS, DDX46, DHX16, NAT10, ACSL3, CHD4, DDX42, MSH6, UPF1, MYO1B, MSH2, DDX1, ACLY, SMC2, EPHA2, SMC3, GART, SMC4, DDX6, CCT7, PSMC6, VCP, SMC1A	250	1577	12983	1.64654	0.152552	0.00915373	0.556604
GOTERM_MF_FAT	GO:0001883~purine nucleoside binding	50	17.3611	0.000562248	DYNC1LI2, CCT3, ACTR3, DDX17, CSNK2A1, TOP2B, DHX30, DYNC1H1, TOP2A, ABCE1, MYO6, PFKL, G3BP1, MCM2, PFKM, CCT6A, MCM3, UBE2C, MCM4, NME2, RARS, UBE2M, SMARCA5, FARSB, TXNRD1, RUVBL1, PRKDC, IARS, DDX46, DHX16, NAT10, ACSL3, CHD4, DDX42, MSH6, UPF1, MYO1B, MSH2, DDX1, ACLY, SMC2, EPHA2, SMC3, GART, SMC4, DDX6, CCT7, PSMC6, VCP, SMC1A	250	1601	12983	1.62186	0.208607	0.0105782	0.78582
GOTERM_MF_FAT	GO:0001882~nucleoside binding	50	17.3611	0.000656235	DYNC1LI2, CCT3, ACTR3, DDX17, CSNK2A1, TOP2B, DHX30, DYNC1H1, TOP2A, ABCE1, MYO6, PFKL, G3BP1, MCM2, PFKM, CCT6A, MCM3, UBE2C, MCM4, NME2, RARS, UBE2M, SMARCA5, FARSB, TXNRD1, RUVBL1, PRKDC, IARS, DDX46, DHX16, NAT10, ACSL3, CHD4, DDX42, MSH6, UPF1, MYO1B, MSH2, DDX1, ACLY, SMC2, EPHA2, SMC3, GART, SMC4, DDX6, CCT7, PSMC6, VCP, SMC1A	250	1612	12983	1.61079	0.238971	0.011803	0.916619
Annotation Cluster 7	Enrichment Score: 4.711328551411099
Category	Term	Count	%	PValue	Genes	List Total	Pop Hits	Pop Total	Fold Enrichment	Bonferroni	Benjamini	FDR
GOTERM_BP_FAT	GO:0010608~posttranscriptional regulation of gene expression	18	6.25	4.10826e-07	SRP14, UPF1, DDX1, PRKDC, ELAVL1, EIF5A, SYNCRIP, GCN1L1, YBX1, EIF4G1, SARNP, SRRT, EIF4G2, EIF4E, RBM8A, SERBP1, TIA1, PABPC1	252	211	13528	4.57955	0.000535163	2.43318e-05	0.000670972
GOTERM_BP_FAT	GO:0032268~regulation of cellular protein metabolic process	23	7.98611	7.59148e-05	SRP14, UPF1, DDX1, EIF5A, GCN1L1, UBE2C, PSMA7, EIF4G1, SARNP, EIF4G2, PSMC6, PSMD14, EIF4E, G6PD, PSMA5, RBM8A, PSMB3, TIA1, PSMA4, PSMA3, PSMD2, PSMD5, PSMD6	252	474	13528	2.60485	0.0941855	0.00201675	0.123914
GOTERM_BP_FAT	GO:0006417~regulation of translation	11	3.81944	0.000235521	SARNP, EIF4G1, SRP14, EIF4G2, UPF1, EIF4E, RBM8A, TIA1, DDX1, EIF5A, GCN1L1	252	137	13528	4.31028	0.264291	0.00527775	0.383967
Annotation Cluster 8	Enrichment Score: 4.447020029149343
Category	Term	Count	%	PValue	Genes	List Total	Pop Hits	Pop Total	Fold Enrichment	Bonferroni	Benjamini	FDR
GOTERM_MF_FAT	GO:0003779~actin binding	21	7.29167	4.76408e-06	INF2, TLN1, MYO6, MYO1B, PDLIM5, ACTN1, ARPC4, COTL1, CAPZB, DSTN, VCL, ACTR3, CORO1C, LASP1, SPTBN1, CYFIP1, FLII, CNN2, LRPPRC, PLEC, SPTAN1	250	326	12983	3.34531	0.0019799	0.000330256	0.00668268
GOTERM_MF_FAT	GO:0008092~cytoskeletal protein binding	26	9.02778	1.32978e-05	TLN1, ALDOC, PDLIM5, ARPC4, CAPZB, VCL, DSTN, ACTR3, NUMA1, CNN2, PLEC, INF2, MYO6, MYO1B, ACTN1, CTNNA1, CAPN2, COTL1, CORO1C, NME2, LASP1, SPTBN1, CYFIP1, FLII, LRPPRC, SPTAN1	250	504	12983	2.67903	0.00551665	0.000691251	0.0186521
GOTERM_CC_FAT	GO:0015629~actin cytoskeleton	15	5.20833	0.000719749	MYO6, PDLIM7, MYO1B, PDLIM5, ARPC4, CTNNA1, CAPZB, IQGAP1, DSTN, VCL, ACTR3, CORO1C, LASP1, SPTBN1, SPTAN1	247	269	12782	2.88563	0.216577	0.00838132	0.975277
Annotation Cluster 9	Enrichment Score: 4.375301623269544
Category	Term	Count	%	PValue	Genes	List Total	Pop Hits	Pop Total	Fold Enrichment	Bonferroni	Benjamini	FDR
GOTERM_BP_FAT	GO:0050658~RNA transport	11	3.81944	1.23397e-05	XPOT, XPO1, UPF1, RBM8A, NUP205, FMR1, EIF5A, MAGOHB, NUP155, XPO7, LRPPRC	252	97	13528	6.08771	0.0159501	0.000401886	0.0201516
GOTERM_BP_FAT	GO:0051236~establishment of RNA localization	11	3.81944	1.23397e-05	XPOT, XPO1, UPF1, RBM8A, NUP205, FMR1, EIF5A, MAGOHB, NUP155, XPO7, LRPPRC	252	97	13528	6.08771	0.0159501	0.000401886	0.0201516
GOTERM_BP_FAT	GO:0050657~nucleic acid transport	11	3.81944	1.23397e-05	XPOT, XPO1, UPF1, RBM8A, NUP205, FMR1, EIF5A, MAGOHB, NUP155, XPO7, LRPPRC	252	97	13528	6.08771	0.0159501	0.000401886	0.0201516
GOTERM_BP_FAT	GO:0006403~RNA localization	11	3.81944	1.6178e-05	XPOT, XPO1, UPF1, RBM8A, NUP205, FMR1, EIF5A, MAGOHB, NUP155, XPO7, LRPPRC	252	100	13528	5.90508	0.0208594	0.00050178	0.0264191
GOTERM_BP_FAT	GO:0051028~mRNA transport	10	3.47222	3.28342e-05	XPO1, UPF1, RBM8A, NUP205, FMR1, EIF5A, MAGOHB, NUP155, XPO7, LRPPRC	252	87	13528	6.17041	0.0418813	0.000950296	0.0536123
GOTERM_BP_FAT	GO:0015931~nucleobase, nucleoside, nucleotide and nucleic acid transport	11	3.81944	4.70072e-05	XPOT, XPO1, UPF1, RBM8A, NUP205, FMR1, EIF5A, MAGOHB, NUP155, XPO7, LRPPRC	252	113	13528	5.22573	0.0594137	0.00130238	0.076746
GOTERM_BP_FAT	GO:0051168~nuclear export	6	2.08333	0.00502996	XPOT, XPO1, UPF1, XPO5, EIF5A, XPO7	252	60	13528	5.36825	0.998599	0.0661538	7.90579
Annotation Cluster 10	Enrichment Score: 3.807068898256639
Category	Term	Count	%	PValue	Genes	List Total	Pop Hits	Pop Total	Fold Enrichment	Bonferroni	Benjamini	FDR
GOTERM_MF_FAT	GO:0004386~helicase activity	13	4.51389	1.58034e-05	UPF1, G3BP1, DDX1, MCM4, DDX6, DDX17, DDX46, SMARCA5, DHX16, RUVBL1, DHX30, CHD4, DDX42	250	140	12983	4.82226	0.00655271	0.000730208	0.0221662
GOTERM_MF_FAT	GO:0016887~ATPase activity	20	6.94444	2.40113e-05	MSH6, ABCE1, UPF1, MSH2, G3BP1, DDX1, DDX6, DDX17, PSMC6, DDX46, VCP, SMARCA5, DHX16, RUVBL1, DHX30, DYNC1H1, PSMD6, TOP2A, CHD4, DDX42	250	334	12983	3.1097	0.0099391	0.000907662	0.0336769
GOTERM_MF_FAT	GO:0070035~purine NTP-dependent helicase activity	10	3.47222	0.000108253	DDX17, DDX46, UPF1, G3BP1, DDX1, DHX16, DHX30, CHD4, DDX42, DDX6	250	98	12983	5.29918	0.0440364	0.00345827	0.151746
GOTERM_MF_FAT	GO:0008026~ATP-dependent helicase activity	10	3.47222	0.000108253	DDX17, DDX46, UPF1, G3BP1, DDX1, DHX16, DHX30, CHD4, DDX42, DDX6	250	98	12983	5.29918	0.0440364	0.00345827	0.151746
GOTERM_MF_FAT	GO:0003724~RNA helicase activity	6	2.08333	0.000203109	DDX17, UPF1, G3BP1, DDX1, DHX16, DDX6	250	29	12983	10.7446	0.08103	0.00561761	0.284537
GOTERM_MF_FAT	GO:0042623~ATPase activity, coupled	12	4.16667	0.0159153	DDX17, DDX46, UPF1, G3BP1, DDX1, DHX16, DHX30, DYNC1H1, TOP2A, CHD4, DDX42, DDX6	250	272	12983	2.29112	0.998737	0.161074	20.1524
Annotation Cluster 11	Enrichment Score: 3.763593496086478
Category	Term	Count	%	PValue	Genes	List Total	Pop Hits	Pop Total	Fold Enrichment	Bonferroni	Benjamini	FDR
GOTERM_BP_FAT	GO:0022402~cell cycle process	31	10.7639	2.07943e-07	PSMA7, RCC1, CTNNB1, NUMA1, PSMB3, PSMD2, RANBP1, PSMD5, DYNC1H1, PSMD6, MSH6, MSH2, ILF3, UBE2C, SMC2, SMC3, SMC4, NCAPD2, PPM1G, EIF4G2, PSMD14, PSMC6, RCC2, CUL4A, GSPT1, PSMA5, PSMA4, PSMA3, RUVBL1, SMC1A, KPNA2	252	565	13528	2.94541	0.000270913	1.69342e-05	0.000339619
GOTERM_BP_FAT	GO:0031145~anaphase-promoting complex-dependent proteasomal ubiquitin-dependent protein catabolic process	11	3.81944	2.95376e-07	PSMD14, PSMC6, PSMA5, PSMA4, PSMB3, PSMA3, PSMD2, PSMD5, PSMD6, PSMA7, UBE2C	252	65	13528	9.08474	0.000384801	2.13817e-05	0.000482416
GOTERM_BP_FAT	GO:0051436~negative regulation of ubiquitin-protein ligase activity during mitotic cell cycle	11	3.81944	2.95376e-07	PSMD14, PSMC6, PSMA5, PSMA4, PSMB3, PSMA3, PSMD2, PSMD5, PSMD6, PSMA7, UBE2C	252	65	13528	9.08474	0.000384801	2.13817e-05	0.000482416
GOTERM_BP_FAT	GO:0043161~proteasomal ubiquitin-dependent protein catabolic process	13	4.51389	3.94361e-07	TBL1XR1, UBE2C, PSMA7, PSMC6, PSMD14, VCP, PSMA5, PSMA4, PSMB3, PSMA3, PSMD2, PSMD5, PSMD6	252	102	13528	6.84189	0.00051372	2.70445e-05	0.00064408
GOTERM_BP_FAT	GO:0010498~proteasomal protein catabolic process	13	4.51389	3.94361e-07	TBL1XR1, UBE2C, PSMA7, PSMC6, PSMD14, VCP, PSMA5, PSMA4, PSMB3, PSMA3, PSMD2, PSMD5, PSMD6	252	102	13528	6.84189	0.00051372	2.70445e-05	0.00064408
GOTERM_BP_FAT	GO:0051444~negative regulation of ubiquitin-protein ligase activity	11	3.81944	3.96097e-07	PSMD14, PSMC6, PSMA5, PSMA4, PSMB3, PSMA3, PSMD2, PSMD5, PSMD6, PSMA7, UBE2C	252	67	13528	8.81355	0.000515981	2.58054e-05	0.000646916
GOTERM_BP_FAT	GO:0051352~negative regulation of ligase activity	11	3.81944	3.96097e-07	PSMD14, PSMC6, PSMA5, PSMA4, PSMB3, PSMA3, PSMD2, PSMD5, PSMD6, PSMA7, UBE2C	252	67	13528	8.81355	0.000515981	2.58054e-05	0.000646916
GOTERM_BP_FAT	GO:0000278~mitotic cell cycle	24	8.33333	4.07073e-07	UBE2C, RCC1, PSMA7, SMC2, SMC3, SMC4, NCAPD2, NUMA1, PSMC6, PSMD14, GSPT1, CUL4A, RCC2, PSMA5, PSMB3, PSMA4, PSMA3, PSMD2, PSMD5, RUVBL1, DYNC1H1, SMC1A, PSMD6, KPNA2	252	370	13528	3.48211	0.000530276	2.52576e-05	0.000664843
GOTERM_BP_FAT	GO:0051437~positive regulation of ubiquitin-protein ligase activity during mitotic cell cycle	11	3.81944	4.56898e-07	PSMD14, PSMC6, PSMA5, PSMA4, PSMB3, PSMA3, PSMD2, PSMD5, PSMD6, PSMA7, UBE2C	252	68	13528	8.68394	0.00059516	2.58839e-05	0.000746217
GOTERM_BP_FAT	GO:0051443~positive regulation of ubiquitin-protein ligase activity	11	3.81944	6.03444e-07	PSMD14, PSMC6, PSMA5, PSMA4, PSMB3, PSMA3, PSMD2, PSMD5, PSMD6, PSMA7, UBE2C	252	70	13528	8.43583	0.000785979	3.1451e-05	0.00098556
GOTERM_BP_FAT	GO:0051439~regulation of ubiquitin-protein ligase activity during mitotic cell cycle	11	3.81944	6.91041e-07	PSMD14, PSMC6, PSMA5, PSMA4, PSMB3, PSMA3, PSMD2, PSMD5, PSMD6, PSMA7, UBE2C	252	71	13528	8.31701	0.000900022	3.46312e-05	0.00112862
GOTERM_BP_FAT	GO:0051351~positive regulation of ligase activity	11	3.81944	9.00131e-07	PSMD14, PSMC6, PSMA5, PSMA4, PSMB3, PSMA3, PSMD2, PSMD5, PSMD6, PSMA7, UBE2C	252	73	13528	8.08915	0.00117218	4.18874e-05	0.00147011
GOTERM_BP_FAT	GO:0031397~negative regulation of protein ubiquitination	11	3.81944	1.02399e-06	PSMD14, PSMC6, PSMA5, PSMA4, PSMB3, PSMA3, PSMD2, PSMD5, PSMD6, PSMA7, UBE2C	252	74	13528	7.97984	0.00133338	4.60081e-05	0.00167241
GOTERM_BP_FAT	GO:0051438~regulation of ubiquitin-protein ligase activity	11	3.81944	1.68068e-06	PSMD14, PSMC6, PSMA5, PSMA4, PSMB3, PSMA3, PSMD2, PSMD5, PSMD6, PSMA7, UBE2C	252	78	13528	7.57061	0.00218753	7.29948e-05	0.0027449
GOTERM_CC_FAT	GO:0000502~proteasome complex	10	3.47222	2.26882e-06	PSMD14, PSMC6, PSMA5, PSMA4, PSMB3, PSMA3, PSMD2, PSMD5, PSMD6, PSMA7	247	61	12782	8.48344	0.000768834	5.1274e-05	0.00308823
GOTERM_BP_FAT	GO:0051340~regulation of ligase activity	11	3.81944	2.38954e-06	PSMD14, PSMC6, PSMA5, PSMA4, PSMB3, PSMA3, PSMD2, PSMD5, PSMD6, PSMA7, UBE2C	252	81	13528	7.29022	0.00310873	9.72944e-05	0.0039026
GOTERM_BP_FAT	GO:0031398~positive regulation of protein ubiquitination	11	3.81944	3.34532e-06	PSMD14, PSMC6, PSMA5, PSMA4, PSMB3, PSMA3, PSMD2, PSMD5, PSMD6, PSMA7, UBE2C	252	84	13528	7.02986	0.00434947	0.000124534	0.00546354
KEGG_PATHWAY	hsa03050:Proteasome	9	3.125	9.18371e-06	PSMD14, PSMC6, PSMA5, PSMA4, PSMB3, PSMA3, PSMD2, PSMD6, PSMA7	118	47	5085	8.25189	0.000872076	0.000436133	0.0100943
GOTERM_BP_FAT	GO:0031400~negative regulation of protein modification process	12	4.16667	1.29955e-05	PSMD14, PSMC6, G6PD, PSMA5, PSMA4, PSMB3, PSMA3, PSMD2, PSMD5, PSMD6, PSMA7, UBE2C	252	119	13528	5.41337	0.0167906	0.000412919	0.0212225
GOTERM_BP_FAT	GO:0031396~regulation of protein ubiquitination	11	3.81944	1.6178e-05	PSMD14, PSMC6, PSMA5, PSMA4, PSMB3, PSMA3, PSMD2, PSMD5, PSMD6, PSMA7, UBE2C	252	100	13528	5.90508	0.0208594	0.00050178	0.0264191
GOTERM_BP_FAT	GO:0032269~negative regulation of cellular protein metabolic process	14	4.86111	3.11462e-05	SRP14, UBE2C, PSMA7, PSMC6, PSMD14, G6PD, PSMA5, PSMB3, PSMA4, TIA1, PSMA3, PSMD2, PSMD5, PSMD6	252	180	13528	4.17531	0.0397716	0.00092194	0.0508567
GOTERM_BP_FAT	GO:0051248~negative regulation of protein metabolic process	14	4.86111	4.63779e-05	SRP14, UBE2C, PSMA7, PSMC6, PSMD14, G6PD, PSMA5, PSMB3, PSMA4, TIA1, PSMA3, PSMD2, PSMD5, PSMD6	252	187	13528	4.01901	0.0586421	0.00131287	0.075719
GOTERM_BP_FAT	GO:0032268~regulation of cellular protein metabolic process	23	7.98611	7.59148e-05	SRP14, UPF1, DDX1, EIF5A, GCN1L1, UBE2C, PSMA7, EIF4G1, SARNP, EIF4G2, PSMC6, PSMD14, EIF4E, G6PD, PSMA5, RBM8A, PSMB3, TIA1, PSMA4, PSMA3, PSMD2, PSMD5, PSMD6	252	474	13528	2.60485	0.0941855	0.00201675	0.123914
GOTERM_BP_FAT	GO:0006511~ubiquitin-dependent protein catabolic process	15	5.20833	0.000172365	TBL1XR1, DDB1, UBE2C, PSMA7, PSMC6, PSMD14, CUL4A, VCP, PSMA5, PSMB3, PSMA4, PSMA3, PSMD2, PSMD5, PSMD6	252	242	13528	3.32743	0.201173	0.00407551	0.281141
GOTERM_MF_FAT	GO:0070003~threonine-type peptidase activity	5	1.73611	0.000502354	PSMA5, PSMA4, PSMB3, PSMA3, PSMA7	250	20	12983	12.983	0.188631	0.0103972	0.702384
GOTERM_MF_FAT	GO:0004298~threonine-type endopeptidase activity	5	1.73611	0.000502354	PSMA5, PSMA4, PSMB3, PSMA3, PSMA7	250	20	12983	12.983	0.188631	0.0103972	0.702384
GOTERM_CC_FAT	GO:0005839~proteasome core complex	5	1.73611	0.000508844	PSMA5, PSMA4, PSMB3, PSMA3, PSMA7	247	20	12782	12.9372	0.158477	0.00637006	0.690412
GOTERM_BP_FAT	GO:0044265~cellular macromolecule catabolic process	27	9.375	0.000998922	PABPC4, PSMA7, EXOSC10, RBM8A, PSMB3, CACYBP, PSMD2, PSMD5, PSMD6, TBL1XR1, ABCE1, UPF1, DDB1, UBR4, UBE2C, PSMD14, PSMC6, VCP, CUL4A, GSPT1, OTUB1, PSMA5, PSMA4, UBE2M, PSMA3, CAND1, XRN2	252	725	13528	1.99921	0.72808	0.0192488	1.61904
GOTERM_BP_FAT	GO:0031401~positive regulation of protein modification process	11	3.81944	0.00259072	PSMD14, PSMC6, PSMA5, PSMA4, PSMB3, PSMA3, PSMD2, PSMD5, PSMD6, PSMA7, UBE2C	252	187	13528	3.1578	0.965955	0.0418835	4.14824
GOTERM_BP_FAT	GO:0009057~macromolecule catabolic process	27	9.375	0.00276373	PABPC4, PSMA7, EXOSC10, RBM8A, PSMB3, CACYBP, PSMD2, PSMD5, PSMD6, TBL1XR1, ABCE1, UPF1, DDB1, UBR4, UBE2C, PSMD14, PSMC6, VCP, CUL4A, GSPT1, OTUB1, PSMA5, PSMA4, UBE2M, PSMA3, CAND1, XRN2	252	781	13528	1.85586	0.972843	0.0440757	4.41942
GOTERM_BP_FAT	GO:0032270~positive regulation of cellular protein metabolic process	12	4.16667	0.00420912	PSMD14, PSMC6, PSMA5, PSMA4, PSMB3, PSMA3, PSMD2, EIF5A, PSMD5, PSMD6, PSMA7, UBE2C	252	233	13528	2.76477	0.995897	0.057385	6.65704
GOTERM_BP_FAT	GO:0010605~negative regulation of macromolecule metabolic process	25	8.68056	0.00497179	SRP14, HMGB1, BCLAF1, HMGB2, MTDH, XPO5, PSMA7, CTNNB1, SRRT, TIA1, PSMB3, PSMD2, PSMD5, PSMD6, TBL1XR1, MSH6, MSH2, ILF3, UBE2C, PSMD14, PSMC6, G6PD, PSMA5, PSMA4, PSMA3	252	734	13528	1.82842	0.998488	0.0660778	7.81783
GOTERM_BP_FAT	GO:0051247~positive regulation of protein metabolic process	12	4.16667	0.00575331	PSMD14, PSMC6, PSMA5, PSMA4, PSMB3, PSMA3, PSMD2, EIF5A, PSMD5, PSMD6, PSMA7, UBE2C	252	243	13528	2.65099	0.999457	0.0738475	8.99322
GOTERM_BP_FAT	GO:0043632~modification-dependent macromolecule catabolic process	20	6.94444	0.0106767	TBL1XR1, DDB1, UBR4, UBE2C, PSMA7, PSMC6, PSMD14, CUL4A, VCP, PSMA5, OTUB1, PSMB3, PSMA4, UBE2M, PSMA3, CACYBP, PSMD2, CAND1, PSMD5, PSMD6	252	574	13528	1.87047	0.999999	0.118389	16.0806
GOTERM_BP_FAT	GO:0019941~modification-dependent protein catabolic process	20	6.94444	0.0106767	TBL1XR1, DDB1, UBR4, UBE2C, PSMA7, PSMC6, PSMD14, CUL4A, VCP, PSMA5, OTUB1, PSMB3, PSMA4, UBE2M, PSMA3, CACYBP, PSMD2, CAND1, PSMD5, PSMD6	252	574	13528	1.87047	0.999999	0.118389	16.0806
GOTERM_BP_FAT	GO:0043086~negative regulation of catalytic activity	12	4.16667	0.0144981	PSMD14, PSMC6, PSMA5, PSMA4, PSMB3, PSMA3, PSMD2, CAND1, PSMD5, PSMD6, PSMA7, UBE2C	252	277	13528	2.3256	1	0.148933	21.2207
GOTERM_BP_FAT	GO:0051603~proteolysis involved in cellular protein catabolic process	20	6.94444	0.0164631	TBL1XR1, DDB1, UBR4, UBE2C, PSMA7, PSMC6, PSMD14, CUL4A, VCP, PSMA5, OTUB1, PSMB3, PSMA4, UBE2M, PSMA3, CACYBP, PSMD2, CAND1, PSMD5, PSMD6	252	600	13528	1.78942	1	0.164938	23.7474
GOTERM_BP_FAT	GO:0044257~cellular protein catabolic process	20	6.94444	0.0171655	TBL1XR1, DDB1, UBR4, UBE2C, PSMA7, PSMC6, PSMD14, CUL4A, VCP, PSMA5, OTUB1, PSMB3, PSMA4, UBE2M, PSMA3, CACYBP, PSMD2, CAND1, PSMD5, PSMD6	252	603	13528	1.78052	1	0.168833	24.6319
GOTERM_BP_FAT	GO:0031399~regulation of protein modification process	12	4.16667	0.0220211	PSMD14, PSMC6, G6PD, PSMA5, PSMA4, PSMB3, PSMA3, PSMD2, PSMD5, PSMD6, PSMA7, UBE2C	252	295	13528	2.1837	1	0.200034	30.4882
GOTERM_BP_FAT	GO:0030163~protein catabolic process	20	6.94444	0.0226693	TBL1XR1, DDB1, UBR4, UBE2C, PSMA7, PSMC6, PSMD14, CUL4A, VCP, PSMA5, OTUB1, PSMB3, PSMA4, UBE2M, PSMA3, CACYBP, PSMD2, CAND1, PSMD5, PSMD6	252	622	13528	1.72613	1	0.20256	31.2369
GOTERM_BP_FAT	GO:0044093~positive regulation of molecular function	19	6.59722	0.0252252	MSH6, MTDH, MSH2, STAT1, UBE2C, PSMA7, CDC42, NME2, PSMC6, PSMD14, VCP, GSPT1, PSMA5, PSMB3, PSMA4, PSMA3, PSMD2, PSMD5, PSMD6	252	586	13528	1.74056	1	0.212976	34.1157
GOTERM_BP_FAT	GO:0043085~positive regulation of catalytic activity	17	5.90278	0.0331676	MSH6, MSH2, UBE2C, PSMA7, STAT1, CDC42, PSMC6, PSMD14, VCP, GSPT1, PSMA5, PSMB3, PSMA4, PSMA3, PSMD2, PSMD5, PSMD6	252	520	13528	1.75501	1	0.256928	42.3564
GOTERM_BP_FAT	GO:0044092~negative regulation of molecular function	12	4.16667	0.0472569	PSMD14, PSMC6, PSMA5, PSMA4, PSMB3, PSMA3, PSMD2, CAND1, PSMD5, PSMD6, PSMA7, UBE2C	252	334	13528	1.92871	1	0.330867	54.6449
GOTERM_BP_FAT	GO:0010604~positive regulation of macromolecule metabolic process	24	8.33333	0.0477671	TBL1XR1, HMGB2, MYO6, NAA15, FHL2, PRKDC, EIF5A, TRIM16, ILF3, UBE2C, PSMA7, PRPF6, CTNNB1, PSMC6, PSMD14, PSMA5, PSMB3, PSMA4, PSMA3, PSMD2, CAND1, PSMD5, PHF5A, PSMD6	252	857	13528	1.50336	1	0.33212	55.0399
GOTERM_BP_FAT	GO:0006508~proteolysis	23	7.98611	0.313039	TBL1XR1, DDB1, UBR4, PSMA7, UBE2C, CAPN2, PWP2, PSMD14, PSMC6, CUL4A, VCP, PSMA5, OTUB1, PSMB3, PSMA4, UBE2M, PSMA3, CACYBP, PSMD2, CAND1, LTA4H, PSMD5, PSMD6	252	1054	13528	1.17144	1	0.881927	99.7829
GOTERM_MF_FAT	GO:0004175~endopeptidase activity	7	2.43056	0.729578	PSMA5, PSMA4, PSMB3, PSMA3, PSMA7, CAPN2, PWP2	250	375	12983	0.969397	1	0.996542	100
GOTERM_MF_FAT	GO:0070011~peptidase activity, acting on L-amino acid peptides	10	3.47222	0.731454	PSMD14, OTUB1, PSMA5, PSMA4, PSMB3, PSMA3, LTA4H, PSMA7, CAPN2, PWP2	250	549	12983	0.945938	1	0.996442	100
GOTERM_MF_FAT	GO:0008233~peptidase activity	10	3.47222	0.777374	PSMD14, OTUB1, PSMA5, PSMA4, PSMB3, PSMA3, LTA4H, PSMA7, CAPN2, PWP2	250	574	12983	0.904739	1	0.997683	100
Annotation Cluster 12	Enrichment Score: 3.2478597544890633
Category	Term	Count	%	PValue	Genes	List Total	Pop Hits	Pop Total	Fold Enrichment	Bonferroni	Benjamini	FDR
GOTERM_MF_FAT	GO:0003729~mRNA binding	9	3.125	3.59641e-05	RBM8A, SERBP1, TIA1, FMR1, PABPC4, ESRP1, ELAVL1, SYNCRIP, PABPC1	250	66	12983	7.08164	0.01485	0.001246	0.0504374
GOTERM_MF_FAT	GO:0008143~poly(A) RNA binding	4	1.38889	0.00036348	TIA1, PABPC4, SYNCRIP, PABPC1	250	8	12983	25.966	0.140355	0.00885673	0.508672
GOTERM_MF_FAT	GO:0070717~poly-purine tract binding	4	1.38889	0.000537505	TIA1, PABPC4, SYNCRIP, PABPC1	250	9	12983	23.0809	0.200415	0.0105941	0.75136
GOTERM_MF_FAT	GO:0003727~single-stranded RNA binding	4	1.38889	0.0145154	TIA1, PABPC4, SYNCRIP, PABPC1	250	27	12983	7.69363	0.997718	0.155459	18.5441
Annotation Cluster 13	Enrichment Score: 3.0411652952757127
Category	Term	Count	%	PValue	Genes	List Total	Pop Hits	Pop Total	Fold Enrichment	Bonferroni	Benjamini	FDR
GOTERM_CC_FAT	GO:0005694~chromosome	26	9.02778	2.85804e-06	PTGES3, XPO1, HMGB1, HMGB2, HP1BP3, RANGAP1, RCC1, BANF1, CSNK2A1, H2AFY, TOP2B, TOP2A, CHD4, SSRP1, MSH6, UPF1, MCM2, MCM3, SMC2, SMC3, NCAPD2, SMC4, RCC2, SMARCA5, SMC1A, LRPPRC	247	460	12782	2.92494	0.000968406	6.05529e-05	0.00389025
GOTERM_CC_FAT	GO:0000793~condensed chromosome	12	4.16667	3.86657e-05	HMGB1, HMGB2, SMARCA5, H2AFY, RANGAP1, RCC1, SMC1A, SMC2, SMC3, LRPPRC, NCAPD2, SMC4	247	129	12782	4.81386	0.0130224	0.000689653	0.0526183
GOTERM_CC_FAT	GO:0000228~nuclear chromosome	13	4.51389	6.93075e-05	MSH6, HMGB2, MCM2, MCM3, RCC1, SMC2, SMC3, NCAPD2, CSNK2A1, H2AFY, SMC1A, TOP2A, LRPPRC	247	162	12782	4.1527	0.0232222	0.00111823	0.094299
GOTERM_CC_FAT	GO:0044427~chromosomal part	19	6.59722	0.000499128	PTGES3, MSH6, XPO1, UPF1, HP1BP3, RANGAP1, MCM2, MCM3, RCC1, SMC2, SMC3, SMC4, NCAPD2, CSNK2A1, RCC2, H2AFY, TOP2B, SMC1A, CHD4	247	386	12782	2.54723	0.155699	0.00648834	0.677271
GOTERM_BP_FAT	GO:0006323~DNA packaging	9	3.125	0.00150466	HMGB2, HP1BP3, SMARCA5, H2AFY, MCM2, TOP2A, SMC2, NCAPD2, SMC4	252	117	13528	4.12943	0.85943	0.0268828	2.42932
GOTERM_BP_FAT	GO:0051276~chromosome organization	20	6.94444	0.00177279	PTGES3, MSH6, TBL1XR1, HMGB1, HMGB2, MSH2, HP1BP3, PRKDC, TRIM16, MCM2, SMC2, SMC3, SMC4, NCAPD2, SMARCA5, H2AFY, RUVBL1, SMC1A, TOP2A, CHD4	252	485	13528	2.21371	0.900937	0.031175	2.85637
GOTERM_CC_FAT	GO:0000785~chromatin	10	3.47222	0.0153779	MSH6, CSNK2A1, UPF1, HP1BP3, H2AFY, MCM2, RCC1, TOP2B, SMC3, CHD4	247	200	12782	2.58745	0.994771	0.0895486	19.0184
GOTERM_CC_FAT	GO:0044454~nuclear chromosome part	7	2.43056	0.0304693	MSH6, CSNK2A1, H2AFY, MCM2, RCC1, MCM3, SMC3	247	122	12782	2.9692	0.999972	0.135575	34.3737
GOTERM_CC_FAT	GO:0000790~nuclear chromatin	4	1.38889	0.0891801	MSH6, CSNK2A1, H2AFY, RCC1	247	55	12782	3.76356	1	0.302213	71.9585
Annotation Cluster 14	Enrichment Score: 2.8628033471732395
Category	Term	Count	%	PValue	Genes	List Total	Pop Hits	Pop Total	Fold Enrichment	Bonferroni	Benjamini	FDR
GOTERM_BP_FAT	GO:0043488~regulation of mRNA stability	5	1.73611	0.000650482	SERBP1, ELAVL1, SYNCRIP, PABPC1, YBX1	252	22	13528	12.2006	0.571667	0.0133678	1.05711
GOTERM_BP_FAT	GO:0043487~regulation of RNA stability	5	1.73611	0.00091779	SERBP1, ELAVL1, SYNCRIP, PABPC1, YBX1	252	24	13528	11.1839	0.697728	0.0182382	1.48846
GOTERM_BP_FAT	GO:0048255~mRNA stabilization	4	1.38889	0.00243447	ELAVL1, SYNCRIP, PABPC1, YBX1	252	15	13528	14.3153	0.958247	0.0409281	3.9027
GOTERM_BP_FAT	GO:0043489~RNA stabilization	4	1.38889	0.00243447	ELAVL1, SYNCRIP, PABPC1, YBX1	252	15	13528	14.3153	0.958247	0.0409281	3.9027
Annotation Cluster 15	Enrichment Score: 2.7570661497755977
Category	Term	Count	%	PValue	Genes	List Total	Pop Hits	Pop Total	Fold Enrichment	Bonferroni	Benjamini	FDR
GOTERM_BP_FAT	GO:0022402~cell cycle process	31	10.7639	2.07943e-07	PSMA7, RCC1, CTNNB1, NUMA1, PSMB3, PSMD2, RANBP1, PSMD5, DYNC1H1, PSMD6, MSH6, MSH2, ILF3, UBE2C, SMC2, SMC3, SMC4, NCAPD2, PPM1G, EIF4G2, PSMD14, PSMC6, RCC2, CUL4A, GSPT1, PSMA5, PSMA4, PSMA3, RUVBL1, SMC1A, KPNA2	252	565	13528	2.94541	0.000270913	1.69342e-05	0.000339619
GOTERM_BP_FAT	GO:0000278~mitotic cell cycle	24	8.33333	4.07073e-07	UBE2C, RCC1, PSMA7, SMC2, SMC3, SMC4, NCAPD2, NUMA1, PSMC6, PSMD14, GSPT1, CUL4A, RCC2, PSMA5, PSMB3, PSMA4, PSMA3, PSMD2, PSMD5, RUVBL1, DYNC1H1, SMC1A, PSMD6, KPNA2	252	370	13528	3.48211	0.000530276	2.52576e-05	0.000664843
GOTERM_BP_FAT	GO:0007049~cell cycle	35	12.1528	2.58242e-06	PSMA7, RCC1, CTNNB1, NUMA1, PSMB3, PSMD2, RANBP1, PSMD5, DYNC1H1, PSMD6, MSH6, UPF1, MSH2, ILF3, MCM2, MCM3, UBE2C, SMC2, SMC3, SMC4, NCAPD2, EIF4G2, PPM1G, PSMD14, PSMC6, PPP1CA, GSPT1, RCC2, CUL4A, PSMA5, PSMA4, PSMA3, RUVBL1, SMC1A, KPNA2	252	776	13528	2.42125	0.00335924	0.000101961	0.0042176
GOTERM_CC_FAT	GO:0000793~condensed chromosome	12	4.16667	3.86657e-05	HMGB1, HMGB2, SMARCA5, H2AFY, RANGAP1, RCC1, SMC1A, SMC2, SMC3, LRPPRC, NCAPD2, SMC4	247	129	12782	4.81386	0.0130224	0.000689653	0.0526183
GOTERM_CC_FAT	GO:0000228~nuclear chromosome	13	4.51389	6.93075e-05	MSH6, HMGB2, MCM2, MCM3, RCC1, SMC2, SMC3, NCAPD2, CSNK2A1, H2AFY, SMC1A, TOP2A, LRPPRC	247	162	12782	4.1527	0.0232222	0.00111823	0.094299
GOTERM_BP_FAT	GO:0000279~M phase	15	5.20833	0.00338573	MSH6, ILF3, UBE2C, RCC1, SMC2, SMC3, SMC4, NCAPD2, NUMA1, RCC2, RANBP1, RUVBL1, SMC1A, DYNC1H1, KPNA2	252	329	13528	2.44753	0.987955	0.0500869	5.38845
GOTERM_BP_FAT	GO:0022403~cell cycle phase	17	5.90278	0.00456197	MSH6, ILF3, UBE2C, RCC1, SMC2, SMC3, SMC4, NCAPD2, NUMA1, CUL4A, RCC2, GSPT1, RANBP1, RUVBL1, DYNC1H1, SMC1A, KPNA2	252	414	13528	2.20436	0.997415	0.0614146	7.19578
GOTERM_CC_FAT	GO:0000796~condensin complex	3	1.04167	0.00525809	SMC2, NCAPD2, SMC4	247	6	12782	25.8745	0.832571	0.0426537	6.92468
GOTERM_BP_FAT	GO:0030261~chromosome condensation	4	1.38889	0.0107368	TOP2A, SMC2, NCAPD2, SMC4	252	25	13528	8.58921	0.999999	0.118021	16.1638
GOTERM_BP_FAT	GO:0007059~chromosome segregation	6	2.08333	0.017276	SMC1A, TOP2A, SMC2, SMC3, NCAPD2, SMC4	252	81	13528	3.97648	1	0.168574	24.7702
GOTERM_BP_FAT	GO:0000280~nuclear division	10	3.47222	0.0217178	NUMA1, RCC2, RUVBL1, RCC1, SMC1A, UBE2C, SMC2, SMC3, NCAPD2, SMC4	252	220	13528	2.44012	1	0.198912	30.1354
GOTERM_BP_FAT	GO:0007067~mitosis	10	3.47222	0.0217178	NUMA1, RCC2, RUVBL1, RCC1, SMC1A, UBE2C, SMC2, SMC3, NCAPD2, SMC4	252	220	13528	2.44012	1	0.198912	30.1354
GOTERM_BP_FAT	GO:0051301~cell division	12	4.16667	0.0220211	CDC42, PPP1CA, RCC2, RUVBL1, RCC1, SMC1A, UBE2C, SMC2, SMC3, NCAPD2, SMC4, DSTN	252	295	13528	2.1837	1	0.200034	30.4882
GOTERM_BP_FAT	GO:0007076~mitotic chromosome condensation	3	1.04167	0.0233738	SMC2, NCAPD2, SMC4	252	13	13528	12.3883	1	0.205452	32.042
GOTERM_BP_FAT	GO:0000087~M phase of mitotic cell cycle	10	3.47222	0.0240632	NUMA1, RCC2, RUVBL1, RCC1, SMC1A, UBE2C, SMC2, SMC3, NCAPD2, SMC4	252	224	13528	2.39654	1	0.208136	32.8212
GOTERM_BP_FAT	GO:0048285~organelle fission	10	3.47222	0.0272406	NUMA1, RCC2, RUVBL1, RCC1, SMC1A, UBE2C, SMC2, SMC3, NCAPD2, SMC4	252	229	13528	2.34422	1	0.221129	36.3057
GOTERM_BP_FAT	GO:0000070~mitotic sister chromatid segregation	4	1.38889	0.0287298	SMC1A, SMC2, NCAPD2, SMC4	252	36	13528	5.96473	1	0.229071	37.8796
GOTERM_BP_FAT	GO:0000819~sister chromatid segregation	4	1.38889	0.0308479	SMC1A, SMC2, NCAPD2, SMC4	252	37	13528	5.80352	1	0.242506	40.0555
GOTERM_BP_FAT	GO:0043085~positive regulation of catalytic activity	17	5.90278	0.0331676	MSH6, MSH2, UBE2C, PSMA7, STAT1, CDC42, PSMC6, PSMD14, VCP, GSPT1, PSMA5, PSMB3, PSMA4, PSMA3, PSMD2, PSMD5, PSMD6	252	520	13528	1.75501	1	0.256928	42.3564
Annotation Cluster 16	Enrichment Score: 2.6976592256365537
Category	Term	Count	%	PValue	Genes	List Total	Pop Hits	Pop Total	Fold Enrichment	Bonferroni	Benjamini	FDR
GOTERM_BP_FAT	GO:0006259~DNA metabolic process	24	8.33333	6.95189e-05	PTGES3, MSH6, HMGB1, SSRP1, HMGB2, UPF1, MSH2, DDB1, PRKDC, MCM2, MCM3, BANF1, MCM4, SMC3, CUL4A, VCP, RUVBL1, TOP2B, SMC1A, KPNA2, TOP2A, APEX1, XRN2, DUT	252	506	13528	2.54621	0.0866045	0.00188544	0.11348
GOTERM_BP_FAT	GO:0006281~DNA repair	14	4.86111	0.00252603	SSRP1, HMGB1, MSH6, HMGB2, UPF1, MSH2, DDB1, PRKDC, SMC3, CUL4A, VCP, SMC1A, TOP2A, APEX1	252	284	13528	2.64632	0.962953	0.0413708	4.04665
GOTERM_BP_FAT	GO:0033554~cellular response to stress	20	6.94444	0.00929792	MSH6, SSRP1, HMGB1, HMGB2, MYO6, UPF1, MSH2, DDB1, PRKDC, PRDX5, SMC3, PYCR1, G6PD, CUL4A, VCP, PRDX6, SMC1A, MYOF, TOP2A, APEX1	252	566	13528	1.89691	0.999995	0.105659	14.1499
GOTERM_BP_FAT	GO:0006974~response to DNA damage stimulus	15	5.20833	0.00991828	SSRP1, HMGB1, MSH6, HMGB2, UPF1, MYO6, MSH2, DDB1, PRKDC, SMC3, CUL4A, VCP, SMC1A, TOP2A, APEX1	252	373	13528	2.15882	0.999998	0.111369	15.0236
Annotation Cluster 17	Enrichment Score: 2.6873111970218453
Category	Term	Count	%	PValue	Genes	List Total	Pop Hits	Pop Total	Fold Enrichment	Bonferroni	Benjamini	FDR
GOTERM_BP_FAT	GO:0022613~ribonucleoprotein complex biogenesis	15	5.20833	6.61292e-06	DDX1, RPL26, HEATR1, SF3A3, PRPF6, DIS3, EXOSC10, EBNA1BP2, EIF3A, NOP2, BRIX1, WDR3, NOP56, SNRPE, GEMIN5	252	180	13528	4.47354	0.00857965	0.000226729	0.0107999
GOTERM_BP_FAT	GO:0042254~ribosome biogenesis	9	3.125	0.00196328	DIS3, EXOSC10, EBNA1BP2, NOP2, BRIX1, RPL26, WDR3, HEATR1, NOP56	252	122	13528	3.96019	0.922747	0.0340117	3.15868
GOTERM_BP_FAT	GO:0034660~ncRNA metabolic process	12	4.16667	0.00382882	IARS, DIS3, EXOSC10, NOP2, AIMP1, RARS, RPL26, FARSB, WDR3, HEATR1, NOP56, NSUN2	252	230	13528	2.80083	0.993252	0.0552184	6.07312
GOTERM_BP_FAT	GO:0006364~rRNA processing	7	2.43056	0.00725971	DIS3, EXOSC10, NOP2, RPL26, WDR3, HEATR1, NOP56	252	92	13528	4.08454	0.999925	0.0888771	11.2193
GOTERM_BP_FAT	GO:0016072~rRNA metabolic process	7	2.43056	0.00888083	DIS3, EXOSC10, NOP2, RPL26, WDR3, HEATR1, NOP56	252	96	13528	3.91435	0.999991	0.103857	13.5576
GOTERM_BP_FAT	GO:0034470~ncRNA processing	9	3.125	0.0234595	DIS3, EXOSC10, SRRT, NOP2, RPL26, WDR3, HEATR1, NOP56, NSUN2	252	187	13528	2.58365	1	0.204772	32.1394
Annotation Cluster 18	Enrichment Score: 2.493572506149986
Category	Term	Count	%	PValue	Genes	List Total	Pop Hits	Pop Total	Fold Enrichment	Bonferroni	Benjamini	FDR
GOTERM_CC_FAT	GO:0009898~internal side of plasma membrane	24	8.33333	4.45814e-08	COPA, TLN1, SEC31A, RAB5C, AP1G1, COPZ1, EIF5A, AP3S1, RANGAP1, NUP155, CTNNA1, ALDH3A2, VCL, CDC42, TJP1, AP2B1, SMAP1, G6PD, FAM120A, COPB1, ARCN1, AP3D1, SPTBN1, AP3B1	247	316	12782	3.9303	1.5113e-05	1.25942e-06	6.06835e-05
GOTERM_CC_FAT	GO:0044459~plasma membrane part	40	13.8889	0.743565	COPA, TLN1, MTDH, SEC31A, VAPA, RAB5C, AP1G1, COPZ1, ITGB4, FHL2, AP3S1, EIF5A, RANGAP1, ALDH3A2, VCL, CTNNB1, ACTR3, CDC42, AP2B1, SMAP1, COPB1, AP3D1, CNN2, AP3B1, MYO6, ACTN1, TRIM25, PFKM, NUP155, CTNNA1, EPHA2, TJP1, G6PD, FAM120A, LASP1, ARCN1, SH3KBP1, CYFIP1, SPTBN1, SPTAN1	247	2203	12782	0.939609	1	0.975046	100
GOTERM_CC_FAT	GO:0005886~plasma membrane	55	19.0972	0.997264	COPA, TLN1, SEC31A, VAPA, RAB5C, AP1G1, AP3S1, EIF5A, RANGAP1, CCT3, IQGAP1, CTNNB1, VCL, ACTR3, CDC42, AP2B1, CSNK2A1, SMAP1, COPB1, AP3B1, MYO6, G3BP1, ACTN1, PFKM, CTNNA1, G6PD, FAM120A, C1QBP, SERBP1, ARCN1, SH3KBP1, HDLBP, MTDH, COPZ1, ITGB4, FHL2, ARF6, ARF5, ALDH3A2, AP3D1, CNN2, MYOF, PLEC, RPSA, TRIM25, NUP155, CAPN2, EPHA2, TJP1, LASP1, ARF4, CYFIP1, SPTBN1, RAP1B, SPTAN1	247	3777	12782	0.75356	1	0.999999	100
Annotation Cluster 19	Enrichment Score: 2.178421311432675
Category	Term	Count	%	PValue	Genes	List Total	Pop Hits	Pop Total	Fold Enrichment	Bonferroni	Benjamini	FDR
GOTERM_CC_FAT	GO:0030117~membrane coat	11	3.81944	3.03257e-07	SEC23A, COPA, AP2B1, SEC31A, AP1G1, COPB1, ARCN1, COPZ1, AP3S1, AP3D1, AP3B1	247	63	12782	9.03554	0.000102799	7.34312e-06	0.000412788
GOTERM_CC_FAT	GO:0048475~coated membrane	11	3.81944	3.03257e-07	SEC23A, COPA, AP2B1, SEC31A, AP1G1, COPB1, ARCN1, COPZ1, AP3S1, AP3D1, AP3B1	247	63	12782	9.03554	0.000102799	7.34312e-06	0.000412788
GOTERM_BP_FAT	GO:0016192~vesicle-mediated transport	27	9.375	2.60352e-05	RAB7A, COPA, SEC31A, PDLIM7, AP1G1, COPZ1, AP3S1, ARF6, ARF5, CTNNB1, AP2B1, COPB1, AP3D1, VPS35, AP3B1, RAB2A, SEC23A, MYO6, CORO1C, NME2, VCP, ARF3, ARCN1, ARF4, SH3KBP1, CPNE1, CPNE3	252	576	13528	2.51637	0.0333553	0.000788626	0.042513
GOTERM_BP_FAT	GO:0048205~COPI coating of Golgi vesicle	4	1.38889	0.000687707	COPA, COPB1, ARCN1, COPZ1	252	10	13528	21.473	0.59196	0.0139085	1.11728
GOTERM_BP_FAT	GO:0048200~Golgi transport vesicle coating	4	1.38889	0.000687707	COPA, COPB1, ARCN1, COPZ1	252	10	13528	21.473	0.59196	0.0139085	1.11728
GOTERM_BP_FAT	GO:0048194~Golgi vesicle budding	4	1.38889	0.000687707	COPA, COPB1, ARCN1, COPZ1	252	10	13528	21.473	0.59196	0.0139085	1.11728
GOTERM_CC_FAT	GO:0030120~vesicle coat	6	2.08333	0.000757425	SEC23A, COPA, SEC31A, COPB1, ARCN1, COPZ1	247	38	12782	8.17089	0.226527	0.00852559	1.02609
GOTERM_CC_FAT	GO:0030126~COPI vesicle coat	4	1.38889	0.00103641	COPA, COPB1, ARCN1, COPZ1	247	11	12782	18.8178	0.296387	0.0109251	1.40157
GOTERM_BP_FAT	GO:0048199~vesicle targeting, to, from or within Golgi	4	1.38889	0.00122658	COPA, COPB1, ARCN1, COPZ1	252	12	13528	17.8942	0.797945	0.0232435	1.98457
GOTERM_CC_FAT	GO:0030663~COPI coated vesicle membrane	4	1.38889	0.00136232	COPA, COPB1, ARCN1, COPZ1	247	12	12782	17.2497	0.370067	0.0139067	1.83853
GOTERM_BP_FAT	GO:0006901~vesicle coating	4	1.38889	0.00243447	COPA, COPB1, ARCN1, COPZ1	252	15	13528	14.3153	0.958247	0.0409281	3.9027
GOTERM_CC_FAT	GO:0030137~COPI-coated vesicle	4	1.38889	0.00269977	COPA, COPB1, ARCN1, COPZ1	247	15	12782	13.7997	0.600067	0.0244649	3.61297
GOTERM_CC_FAT	GO:0030662~coated vesicle membrane	7	2.43056	0.00277488	SEC23A, COPA, SEC31A, MYO6, COPB1, ARCN1, COPZ1	247	73	12782	4.96223	0.61015	0.0244846	3.71174
GOTERM_BP_FAT	GO:0006900~membrane budding	4	1.38889	0.0029555	COPA, COPB1, ARCN1, COPZ1	252	16	13528	13.4206	0.978863	0.0464981	4.71918
GOTERM_BP_FAT	GO:0048193~Golgi vesicle transport	9	3.125	0.00306034	SEC23A, RAB2A, COPA, SEC31A, VCP, AP1G1, COPB1, ARCN1, COPZ1	252	131	13528	3.68811	0.981569	0.047537	4.88267
GOTERM_BP_FAT	GO:0006890~retrograde vesicle-mediated transport, Golgi to ER	4	1.38889	0.00655587	COPA, COPB1, ARCN1, COPZ1	252	21	13528	10.2252	0.99981	0.0821343	10.1856
GOTERM_BP_FAT	GO:0006903~vesicle targeting	4	1.38889	0.0074883	COPA, COPB1, ARCN1, COPZ1	252	22	13528	9.76046	0.999944	0.0898745	11.5525
GOTERM_BP_FAT	GO:0051656~establishment of organelle localization	6	2.08333	0.00905216	CDC42, COPA, COPB1, ARCN1, COPZ1, LRPPRC	252	69	13528	4.66805	0.999993	0.103906	13.8014
GOTERM_BP_FAT	GO:0016044~membrane organization	15	5.20833	0.0118147	SEC23A, RAB7A, COPA, SEC31A, MYO6, PDLIM7, VAPA, AP1G1, COPZ1, CORO1C, NME2, COPB1, ARCN1, SH3KBP1, AP3B1	252	381	13528	2.11349	1	0.127021	17.6432
GOTERM_CC_FAT	GO:0030660~Golgi-associated vesicle membrane	4	1.38889	0.0177937	COPA, COPB1, ARCN1, COPZ1	247	29	12782	7.13779	0.997726	0.096464	21.6814
GOTERM_CC_FAT	GO:0030659~cytoplasmic vesicle membrane	8	2.77778	0.0179548	SEC23A, COPA, AP2B1, SEC31A, MYO6, COPB1, ARCN1, COPZ1	247	139	12782	2.97836	0.997849	0.0957854	21.8562
GOTERM_BP_FAT	GO:0051650~establishment of vesicle localization	4	1.38889	0.0228578	COPA, COPB1, ARCN1, COPZ1	252	33	13528	6.50697	1	0.20271	31.4532
GOTERM_CC_FAT	GO:0012506~vesicle membrane	8	2.77778	0.0268159	SEC23A, COPA, AP2B1, SEC31A, MYO6, COPB1, ARCN1, COPZ1	247	151	12782	2.74167	0.9999	0.12673	30.9263
GOTERM_CC_FAT	GO:0044433~cytoplasmic vesicle part	9	3.125	0.0281696	SEC23A, COPA, AP2B1, SEC31A, MYO6, COPB1, ARCN1, COPZ1, ACTN1	247	187	12782	2.49059	0.999938	0.130976	32.2228
GOTERM_BP_FAT	GO:0051640~organelle localization	6	2.08333	0.0282	CDC42, COPA, COPB1, ARCN1, COPZ1, LRPPRC	252	92	13528	3.50104	1	0.226673	37.3239
GOTERM_BP_FAT	GO:0051648~vesicle localization	4	1.38889	0.0308479	COPA, COPB1, ARCN1, COPZ1	252	37	13528	5.80352	1	0.242506	40.0555
GOTERM_CC_FAT	GO:0031982~vesicle	21	7.29167	0.0340269	RAB2A, SEC23A, RAB7A, COPA, MYO6, SEC31A, AIMP1, VAPA, AP1G1, RAB5C, ANP32E, COPZ1, ACTN1, AP3S1, AP2B1, PRDX6, COPB1, ARCN1, SH3KBP1, MYOF, AP3B1	247	670	12782	1.62198	0.999992	0.146657	37.5768
GOTERM_CC_FAT	GO:0030135~coated vesicle	8	2.77778	0.0341501	SEC23A, COPA, SEC31A, MYO6, AP1G1, COPB1, ARCN1, COPZ1	247	159	12782	2.60372	0.999992	0.145343	37.685
GOTERM_CC_FAT	GO:0031410~cytoplasmic vesicle	20	6.94444	0.0415412	RAB2A, SEC23A, RAB7A, COPA, MYO6, SEC31A, AIMP1, AP1G1, RAB5C, ANP32E, COPZ1, ACTN1, AP3S1, AP2B1, PRDX6, COPB1, ARCN1, SH3KBP1, MYOF, AP3B1	247	642	12782	1.61212	0.999999	0.168398	43.8719
GOTERM_CC_FAT	GO:0016023~cytoplasmic membrane-bounded vesicle	17	5.90278	0.0667471	RAB2A, SEC23A, RAB7A, COPA, SEC31A, MYO6, AIMP1, AP1G1, RAB5C, COPZ1, ANP32E, ACTN1, AP3S1, AP2B1, PRDX6, COPB1, ARCN1	247	550	12782	1.59951	1	0.253771	60.9487
GOTERM_BP_FAT	GO:0016050~vesicle organization	4	1.38889	0.0718563	COPA, COPB1, ARCN1, COPZ1	252	52	13528	4.12943	1	0.445044	70.4143
GOTERM_CC_FAT	GO:0005798~Golgi-associated vesicle	4	1.38889	0.0747655	COPA, COPB1, ARCN1, COPZ1	247	51	12782	4.05874	1	0.27195	65.2764
GOTERM_CC_FAT	GO:0031988~membrane-bounded vesicle	17	5.90278	0.0822155	RAB2A, SEC23A, RAB7A, COPA, SEC31A, MYO6, AIMP1, AP1G1, RAB5C, COPZ1, ANP32E, ACTN1, AP3S1, AP2B1, PRDX6, COPB1, ARCN1	247	568	12782	1.54883	1	0.284158	68.8949
GOTERM_CC_FAT	GO:0000139~Golgi membrane	7	2.43056	0.14938	SEC23A, ACTR3, COPA, AP1G1, COPB1, ARCN1, COPZ1	247	186	12782	1.94754	1	0.449077	88.9447
GOTERM_CC_FAT	GO:0005794~Golgi apparatus	21	7.29167	0.238078	RAB2A, SEC23A, RAB7A, COPA, SEC31A, MYO6, AIMP1, AP1G1, COPZ1, AP3S1, ARF6, STIP1, ARF5, ACTR3, ARF3, COPB1, ARF4, ARCN1, AP3D1, DYNC1H1, AP3B1	247	872	12782	1.24625	1	0.605876	97.5306
GOTERM_CC_FAT	GO:0044431~Golgi apparatus part	8	2.77778	0.33708	SEC23A, ACTR3, COPA, SEC31A, AP1G1, COPB1, ARCN1, COPZ1	247	294	12782	1.40814	1	0.741547	99.6287
GOTERM_CC_FAT	GO:0031090~organelle membrane	23	7.98611	0.450731	SEC23A, COPA, SEC31A, MTDH, MYO6, VAPA, IMMT, AP1G1, COPZ1, CHCHD3, STOML2, ALDH3A2, HADHB, ACTR3, AP2B1, COPB1, ARCN1, CSDE1, SSR4, ACSL3, SEC61A1, MATR3, LRPPRC	247	1096	12782	1.08597	1	0.839569	99.9713
KEGG_PATHWAY	hsa04142:Lysosome	4	1.38889	0.508336	AP1G1, AP3S1, AP3D1, AP3B1	118	117	5085	1.47327	1	0.96569	99.9592
Annotation Cluster 20	Enrichment Score: 2.173041807895333
Category	Term	Count	%	PValue	Genes	List Total	Pop Hits	Pop Total	Fold Enrichment	Bonferroni	Benjamini	FDR
GOTERM_CC_FAT	GO:0005912~adherens junction	11	3.81944	0.000830759	TLN1, TJP1, LASP1, SH3KBP1, FHL2, ACTN1, TRIM25, CTNNA1, SPTAN1, CTNNB1, VCL	247	155	12782	3.67251	0.245534	0.00904736	1.12491
KEGG_PATHWAY	hsa04520:Adherens junction	8	2.77778	0.00181235	CDC42, TJP1, CSNK2A1, ACTN1, CTNNA1, IQGAP1, CTNNB1, VCL	118	77	5085	4.47722	0.158298	0.0338787	1.9742
GOTERM_CC_FAT	GO:0070161~anchoring junction	11	3.81944	0.00182723	TLN1, TJP1, LASP1, SH3KBP1, FHL2, ACTN1, TRIM25, CTNNA1, SPTAN1, CTNNB1, VCL	247	172	12782	3.30953	0.462055	0.0175583	2.45875
GOTERM_BP_FAT	GO:0045216~cell-cell junction organization	5	1.73611	0.00385558	CDC42, TLN1, TJP1, CTNNA1, VCL	252	35	13528	7.66893	0.993484	0.0543929	6.11431
GOTERM_BP_FAT	GO:0034330~cell junction organization	6	2.08333	0.00403296	CDC42, TLN1, TJP1, ACTN1, CTNNA1, VCL	252	57	13528	5.65079	0.994834	0.0562212	6.38699
GOTERM_BP_FAT	GO:0007043~cell-cell junction assembly	4	1.38889	0.00419036	TLN1, TJP1, CTNNA1, VCL	252	18	13528	11.9295	0.995795	0.0577389	6.62831
GOTERM_BP_FAT	GO:0034329~cell junction assembly	5	1.73611	0.00683885	TLN1, TJP1, ACTN1, CTNNA1, VCL	252	41	13528	6.54665	0.999869	0.0847253	10.6025
GOTERM_MF_FAT	GO:0017166~vinculin binding	3	1.04167	0.00721969	TLN1, ACTN1, CTNNA1	250	7	12983	22.2566	0.950919	0.0872945	9.66477
KEGG_PATHWAY	hsa04530:Tight junction	9	3.125	0.0115639	CDC42, TJP1, CSNK2A1, VAPA, ACTN1, CTNNA1, SPTAN1, CTNNB1, PPP2R2A	118	134	5085	2.89432	0.66878	0.168199	12.0016
KEGG_PATHWAY	hsa04510:Focal adhesion	9	3.125	0.0905481	CDC42, PPP1CA, TLN1, ITGB4, ACTN1, RAP1B, CAPN2, CTNNB1, VCL	118	201	5085	1.92955	0.999879	0.632805	64.7706
KEGG_PATHWAY	hsa04670:Leukocyte transendothelial migration	6	2.08333	0.134765	CDC42, ACTN1, RAP1B, CTNNA1, CTNNB1, VCL	118	118	5085	2.19118	0.999999	0.747202	79.6308
Annotation Cluster 21	Enrichment Score: 2.1480067916823877
Category	Term	Count	%	PValue	Genes	List Total	Pop Hits	Pop Total	Fold Enrichment	Bonferroni	Benjamini	FDR
GOTERM_CC_FAT	GO:0005912~adherens junction	11	3.81944	0.000830759	TLN1, TJP1, LASP1, SH3KBP1, FHL2, ACTN1, TRIM25, CTNNA1, SPTAN1, CTNNB1, VCL	247	155	12782	3.67251	0.245534	0.00904736	1.12491
GOTERM_CC_FAT	GO:0070161~anchoring junction	11	3.81944	0.00182723	TLN1, TJP1, LASP1, SH3KBP1, FHL2, ACTN1, TRIM25, CTNNA1, SPTAN1, CTNNB1, VCL	247	172	12782	3.30953	0.462055	0.0175583	2.45875
GOTERM_CC_FAT	GO:0030055~cell-substrate junction	8	2.77778	0.00587454	ACTR3, TLN1, LASP1, SH3KBP1, FHL2, ACTN1, TRIM25, VCL	247	112	12782	3.69636	0.864304	0.0453875	7.70674
GOTERM_CC_FAT	GO:0016323~basolateral plasma membrane	11	3.81944	0.00596506	ACTR3, TLN1, TJP1, LASP1, ITGB4, SH3KBP1, FHL2, ACTN1, TRIM25, CTNNB1, VCL	247	203	12782	2.80413	0.868429	0.0450494	7.82107
GOTERM_CC_FAT	GO:0005925~focal adhesion	7	2.43056	0.0138797	TLN1, LASP1, SH3KBP1, FHL2, ACTN1, TRIM25, VCL	247	102	12782	3.5514	0.991245	0.0855198	17.3249
GOTERM_CC_FAT	GO:0005924~cell-substrate adherens junction	7	2.43056	0.0165135	TLN1, LASP1, SH3KBP1, FHL2, ACTN1, TRIM25, VCL	247	106	12782	3.41739	0.996464	0.0912404	20.2805
GOTERM_CC_FAT	GO:0030054~cell junction	16	5.55556	0.0754877	TLN1, MTDH, VAPA, FHL2, ACTN1, TRIM25, CTNNA1, VCL, CTNNB1, ACTR3, TJP1, LASP1, SH3KBP1, CYFIP1, CNN2, SPTAN1	247	518	12782	1.59842	1	0.271494	65.6435
Annotation Cluster 22	Enrichment Score: 2.140412000874342
Category	Term	Count	%	PValue	Genes	List Total	Pop Hits	Pop Total	Fold Enrichment	Bonferroni	Benjamini	FDR
GOTERM_BP_FAT	GO:0006268~DNA unwinding during replication	4	1.38889	0.00197446	HMGB1, HMGB2, MCM2, MCM4	252	14	13528	15.3379	0.923867	0.0337541	3.1764
GOTERM_BP_FAT	GO:0032508~DNA duplex unwinding	4	1.38889	0.00419036	HMGB1, HMGB2, MCM2, MCM4	252	18	13528	11.9295	0.995795	0.0577389	6.62831
GOTERM_BP_FAT	GO:0032392~DNA geometric change	4	1.38889	0.00419036	HMGB1, HMGB2, MCM2, MCM4	252	18	13528	11.9295	0.995795	0.0577389	6.62831
GOTERM_BP_FAT	GO:0006261~DNA-dependent DNA replication	5	1.73611	0.0224625	HMGB1, HMGB2, MCM2, MCM3, MCM4	252	58	13528	4.62781	1	0.20226	30.9989
GOTERM_BP_FAT	GO:0006260~DNA replication	9	3.125	0.0254994	HMGB1, SSRP1, HMGB2, UPF1, MCM2, MCM3, MCM4, TOP2A, DUT	252	190	13528	2.54286	1	0.212349	34.4179
Annotation Cluster 23	Enrichment Score: 2.110241603715673
Category	Term	Count	%	PValue	Genes	List Total	Pop Hits	Pop Total	Fold Enrichment	Bonferroni	Benjamini	FDR
GOTERM_BP_FAT	GO:0006007~glucose catabolic process	8	2.77778	9.34256e-05	GPI, LDHA, G6PD, PFKL, ALDOC, DLAT, PFKM, GAPDH	252	58	13528	7.40449	0.114621	0.00243182	0.152476
GOTERM_BP_FAT	GO:0046164~alcohol catabolic process	9	3.125	0.000125621	GPI, LDHA, G6PD, SORD, PFKL, ALDOC, DLAT, PFKM, GAPDH	252	81	13528	5.96473	0.150999	0.00320456	0.204971
GOTERM_BP_FAT	GO:0044275~cellular carbohydrate catabolic process	9	3.125	0.000176366	GPI, LDHA, G6PD, SORD, PFKL, ALDOC, DLAT, PFKM, GAPDH	252	85	13528	5.68403	0.205327	0.00409561	0.287657
KEGG_PATHWAY	hsa00030:Pentose phosphate pathway	6	2.08333	0.000217563	GPI, G6PD, PFKL, ALDOC, TKT, PFKM	118	25	5085	10.3424	0.0204586	0.00686657	0.238887
GOTERM_BP_FAT	GO:0006096~glycolysis	7	2.43056	0.000218144	GPI, LDHA, PFKL, ALDOC, DLAT, PFKM, GAPDH	252	47	13528	7.99527	0.247439	0.00497483	0.355685
GOTERM_BP_FAT	GO:0019320~hexose catabolic process	8	2.77778	0.000281984	GPI, LDHA, G6PD, PFKL, ALDOC, DLAT, PFKM, GAPDH	252	69	13528	6.22406	0.30752	0.00610589	0.45955
GOTERM_BP_FAT	GO:0046365~monosaccharide catabolic process	8	2.77778	0.000336839	GPI, LDHA, G6PD, PFKL, ALDOC, DLAT, PFKM, GAPDH	252	71	13528	6.04874	0.355303	0.00717048	0.548717
KEGG_PATHWAY	hsa00010:Glycolysis / Gluconeogenesis	8	2.77778	0.000401567	GPI, LDHA, PFKL, ALDOC, DLAT, PFKM, GAPDH, ALDH3A2	118	60	5085	5.74576	0.0374378	0.00949379	0.44052
GOTERM_BP_FAT	GO:0006006~glucose metabolic process	11	3.81944	0.000569236	GPI, PPP1CA, LDHA, G6PD, SORD, PFKL, AIMP1, ALDOC, DLAT, PFKM, GAPDH	252	153	13528	3.85953	0.523804	0.0118952	0.925649
GOTERM_BP_FAT	GO:0016052~carbohydrate catabolic process	9	3.125	0.00095133	GPI, LDHA, G6PD, SORD, PFKL, ALDOC, DLAT, PFKM, GAPDH	252	109	13528	4.4325	0.710666	0.0186151	1.54246
GOTERM_BP_FAT	GO:0019318~hexose metabolic process	11	3.81944	0.00312818	GPI, PPP1CA, LDHA, G6PD, SORD, PFKL, AIMP1, ALDOC, DLAT, PFKM, GAPDH	252	192	13528	3.07556	0.983133	0.0479956	4.98833
GOTERM_BP_FAT	GO:0006000~fructose metabolic process	4	1.38889	0.00354004	SORD, PFKL, ALDOC, PFKM	252	17	13528	12.6312	0.990156	0.0517274	5.62742
GOTERM_BP_FAT	GO:0005996~monosaccharide metabolic process	11	3.81944	0.0085631	GPI, PPP1CA, LDHA, G6PD, SORD, PFKL, AIMP1, ALDOC, DLAT, PFKM, GAPDH	252	222	13528	2.65995	0.999986	0.101224	13.1039
KEGG_PATHWAY	hsa00051:Fructose and mannose metabolism	4	1.38889	0.0423505	SORD, PFKL, ALDOC, PFKM	118	34	5085	5.06979	0.983608	0.401825	37.8528
GOTERM_BP_FAT	GO:0006091~generation of precursor metabolites and energy	10	3.47222	0.128996	GPI, PPP1CA, LDHA, PFKL, MSH2, ALDOC, TXNRD1, DLAT, PFKM, GAPDH	252	313	13528	1.7151	1	0.621951	89.5193
GOTERM_MF_FAT	GO:0048029~monosaccharide binding	3	1.04167	0.178492	G6PD, PFKL, PFKM	250	40	12983	3.8949	1	0.715872	93.6584
GOTERM_BP_FAT	GO:0006090~pyruvate metabolic process	3	1.04167	0.182887	GPI, LDHA, DLAT	252	42	13528	3.83447	1	0.742461	96.3071
GOTERM_MF_FAT	GO:0051287~NAD or NADH binding	3	1.04167	0.22759	SORD, GAPDH, HADHB	250	47	12983	3.31481	1	0.789217	97.3284
GOTERM_MF_FAT	GO:0050662~coenzyme binding	6	2.08333	0.267538	G6PD, SORD, TXNRD1, DLAT, GAPDH, HADHB	250	181	12983	1.7215	1	0.834515	98.7316
GOTERM_BP_FAT	GO:0051259~protein oligomerization	5	1.73611	0.404253	PFKL, VCP, ALDOC, PFKM, CTNNB1	252	174	13528	1.5426	1	0.936365	99.9788
GOTERM_MF_FAT	GO:0048037~cofactor binding	6	2.08333	0.521008	G6PD, SORD, TXNRD1, DLAT, GAPDH, HADHB	250	249	12983	1.25137	1	0.972742	99.9967
GOTERM_MF_FAT	GO:0005529~sugar binding	4	1.38889	0.726228	G6PD, SORD, PFKL, PFKM	250	195	12983	1.06527	1	0.996956	100
GOTERM_MF_FAT	GO:0030246~carbohydrate binding	5	1.73611	0.911724	G6PD, SORD, PFKL, HDGF, PFKM	250	354	12983	0.733503	1	0.999888	100
Annotation Cluster 24	Enrichment Score: 2.109544959490518
Category	Term	Count	%	PValue	Genes	List Total	Pop Hits	Pop Total	Fold Enrichment	Bonferroni	Benjamini	FDR
GOTERM_CC_FAT	GO:0005813~centrosome	12	4.16667	0.00405486	NME2, G6PD, NUDT21, FLII, RANBP1, C14ORF166, RUVBL1, MCM3, MYOF, APEX1, TOP2A, CTNNB1	247	224	12782	2.77227	0.747764	0.0338487	5.38048
GOTERM_CC_FAT	GO:0044430~cytoskeletal part	30	10.4167	0.00923222	DYNC1LI2, PDLIM7, VAPA, ARPC4, C14ORF166, CAPZB, IQGAP1, DSTN, CTNNB1, ACTR3, NUMA1, NUDT21, RANBP1, DYNC1H1, TOP2A, MYOF, APEX1, TBL1XR1, MYO6, MYO1B, MCM3, SMC3, NME2, G6PD, RCC2, LASP1, SPTBN1, FLII, RUVBL1, SPTAN1	247	952	12782	1.63075	0.956901	0.0647105	11.8607
GOTERM_CC_FAT	GO:0015630~microtubule cytoskeleton	20	6.94444	0.00979713	TBL1XR1, DYNC1LI2, VAPA, ARPC4, C14ORF166, MCM3, SMC3, CTNNB1, NUMA1, NME2, G6PD, RCC2, NUDT21, FLII, RANBP1, RUVBL1, DYNC1H1, MYOF, TOP2A, APEX1	247	549	12782	1.88521	0.964478	0.0658464	12.5423
GOTERM_CC_FAT	GO:0005815~microtubule organizing center	12	4.16667	0.0099412	NME2, G6PD, NUDT21, FLII, RANBP1, C14ORF166, RUVBL1, MCM3, MYOF, APEX1, TOP2A, CTNNB1	247	253	12782	2.4545	0.966188	0.0654953	12.7153
Annotation Cluster 25	Enrichment Score: 2.0610719141184326
Category	Term	Count	%	PValue	Genes	List Total	Pop Hits	Pop Total	Fold Enrichment	Bonferroni	Benjamini	FDR
GOTERM_CC_FAT	GO:0044445~cytosolic part	11	3.81944	0.000714075	CCT7, RPSA, PFDN2, PFKL, RPL26, VBP1, PRDX5, CCT3, CCT6A, PFKM, CTNNB1	247	152	12782	3.74499	0.215068	0.0086112	0.967623
GOTERM_CC_FAT	GO:0005832~chaperonin-containing T-complex	3	1.04167	0.00726821	CCT7, CCT3, CCT6A	247	7	12782	22.1781	0.915662	0.0523397	9.45245
GOTERM_MF_FAT	GO:0051082~unfolded protein binding	7	2.43056	0.0233141	PTGES3, CCT7, PFDN2, COPA, VBP1, CCT3, CCT6A	250	115	12983	3.16108	0.999945	0.208365	28.1733
GOTERM_BP_FAT	GO:0006457~protein folding	8	2.77778	0.0470893	CCT7, ST13, PFDN2, COPA, VBP1, CCT3, CCT6A, AHSA1	252	177	13528	2.42633	1	0.331607	54.5144
Annotation Cluster 26	Enrichment Score: 2.031240309294889
Category	Term	Count	%	PValue	Genes	List Total	Pop Hits	Pop Total	Fold Enrichment	Bonferroni	Benjamini	FDR
GOTERM_CC_FAT	GO:0005912~adherens junction	11	3.81944	0.000830759	TLN1, TJP1, LASP1, SH3KBP1, FHL2, ACTN1, TRIM25, CTNNA1, SPTAN1, CTNNB1, VCL	247	155	12782	3.67251	0.245534	0.00904736	1.12491
GOTERM_CC_FAT	GO:0070161~anchoring junction	11	3.81944	0.00182723	TLN1, TJP1, LASP1, SH3KBP1, FHL2, ACTN1, TRIM25, CTNNA1, SPTAN1, CTNNB1, VCL	247	172	12782	3.30953	0.462055	0.0175583	2.45875
GOTERM_CC_FAT	GO:0030016~myofibril	8	2.77778	0.00559668	PDLIM5, FHL2, SPTBN1, ACTN1, SPTAN1, FXR1, CTNNB1, VCL	247	111	12782	3.72966	0.85082	0.0442893	7.35499
GOTERM_CC_FAT	GO:0044449~contractile fiber part	8	2.77778	0.00616258	PDLIM5, FHL2, SPTBN1, ACTN1, SPTAN1, FXR1, CTNNB1, VCL	247	113	12782	3.66365	0.877001	0.0455008	8.07009
GOTERM_CC_FAT	GO:0005916~fascia adherens	3	1.04167	0.014993	SPTAN1, CTNNB1, VCL	247	10	12782	15.5247	0.994031	0.0889078	18.5864
GOTERM_CC_FAT	GO:0005913~cell-cell adherens junction	4	1.38889	0.0293086	TJP1, SPTAN1, CTNNB1, VCL	247	35	12782	5.91417	0.999958	0.134163	33.2962
GOTERM_CC_FAT	GO:0014704~intercalated disc	3	1.04167	0.0328465	SPTAN1, CTNNB1, VCL	247	15	12782	10.3498	0.999988	0.143666	36.5304
GOTERM_CC_FAT	GO:0005911~cell-cell junction	8	2.77778	0.0744288	TLN1, TJP1, MTDH, VAPA, CNN2, SPTAN1, CTNNB1, VCL	247	190	12782	2.1789	1	0.273671	65.104
Annotation Cluster 27	Enrichment Score: 2.0155927906752673
Category	Term	Count	%	PValue	Genes	List Total	Pop Hits	Pop Total	Fold Enrichment	Bonferroni	Benjamini	FDR
GOTERM_CC_FAT	GO:0043292~contractile fiber	9	3.125	0.00233313	PDLIM5, FHL2, SPTBN1, ACTN1, SPTAN1, FXR1, CTNNB1, VCL, PLEC	247	121	12782	3.8491	0.546996	0.0217558	3.12951
GOTERM_CC_FAT	GO:0030016~myofibril	8	2.77778	0.00559668	PDLIM5, FHL2, SPTBN1, ACTN1, SPTAN1, FXR1, CTNNB1, VCL	247	111	12782	3.72966	0.85082	0.0442893	7.35499
GOTERM_CC_FAT	GO:0044449~contractile fiber part	8	2.77778	0.00616258	PDLIM5, FHL2, SPTBN1, ACTN1, SPTAN1, FXR1, CTNNB1, VCL	247	113	12782	3.66365	0.877001	0.0455008	8.07009
GOTERM_CC_FAT	GO:0030018~Z disc	5	1.73611	0.0116039	PDLIM5, FHL2, ACTN1, SPTAN1, CTNNB1	247	46	12782	5.62489	0.980874	0.0746497	14.6896
GOTERM_CC_FAT	GO:0031674~I band	5	1.73611	0.0212235	PDLIM5, FHL2, ACTN1, SPTAN1, CTNNB1	247	55	12782	4.70445	0.999305	0.109019	25.3232
GOTERM_CC_FAT	GO:0030017~sarcomere	6	2.08333	0.0406808	PDLIM5, FHL2, SPTBN1, ACTN1, SPTAN1, CTNNB1	247	98	12782	3.16831	0.999999	0.167104	43.1821
Annotation Cluster 28	Enrichment Score: 1.9740066222958175
Category	Term	Count	%	PValue	Genes	List Total	Pop Hits	Pop Total	Fold Enrichment	Bonferroni	Benjamini	FDR
GOTERM_BP_FAT	GO:0007010~cytoskeleton organization	18	6.25	0.00322407	INF2, TLN1, PDLIM7, ACTN1, ARF6, ARPC4, UBE2C, RCC1, CAPZB, SMC3, CTNNB1, DSTN, CDC42, LASP1, CNN2, RANBP1, SMC1A, DYNC1H1	252	436	13528	2.21625	0.98512	0.0488584	5.13749
GOTERM_BP_FAT	GO:0030029~actin filament-based process	11	3.81944	0.0146287	INF2, CDC42, TLN1, MYO6, PDLIM7, ACTN1, CNN2, ARF6, ARPC4, CAPZB, DSTN	252	241	13528	2.45024	1	0.149016	21.3912
GOTERM_BP_FAT	GO:0030036~actin cytoskeleton organization	10	3.47222	0.0253728	INF2, CDC42, TLN1, PDLIM7, ACTN1, CNN2, ARF6, ARPC4, CAPZB, DSTN	252	226	13528	2.37533	1	0.212739	34.2785
Annotation Cluster 29	Enrichment Score: 1.8914561826654321
Category	Term	Count	%	PValue	Genes	List Total	Pop Hits	Pop Total	Fold Enrichment	Bonferroni	Benjamini	FDR
GOTERM_BP_FAT	GO:0006401~RNA catabolic process	7	2.43056	0.00127126	EXOSC10, ABCE1, UPF1, GSPT1, RBM8A, PABPC4, XRN2	252	65	13528	5.7812	0.809386	0.0237356	2.05615
GOTERM_BP_FAT	GO:0000184~nuclear-transcribed mRNA catabolic process, nonsense-mediated decay	4	1.38889	0.0177118	EXOSC10, UPF1, GSPT1, RBM8A	252	30	13528	7.15767	1	0.171207	25.3132
GOTERM_BP_FAT	GO:0000956~nuclear-transcribed mRNA catabolic process	4	1.38889	0.0266919	EXOSC10, UPF1, GSPT1, RBM8A	252	35	13528	6.13515	1	0.219839	35.7163
GOTERM_BP_FAT	GO:0006402~mRNA catabolic process	4	1.38889	0.0452167	EXOSC10, UPF1, GSPT1, RBM8A	252	43	13528	4.99372	1	0.325685	53.0323
Annotation Cluster 30	Enrichment Score: 1.6697459380462172
Category	Term	Count	%	PValue	Genes	List Total	Pop Hits	Pop Total	Fold Enrichment	Bonferroni	Benjamini	FDR
GOTERM_BP_FAT	GO:0007051~spindle organization	6	2.08333	0.00140865	RANBP1, RCC1, DYNC1H1, SMC1A, UBE2C, SMC3	252	45	13528	7.15767	0.840668	0.0255382	2.27597
GOTERM_BP_FAT	GO:0007052~mitotic spindle organization	4	1.38889	0.00243447	RCC1, DYNC1H1, SMC1A, SMC3	252	15	13528	14.3153	0.958247	0.0409281	3.9027
GOTERM_BP_FAT	GO:0000279~M phase	15	5.20833	0.00338573	MSH6, ILF3, UBE2C, RCC1, SMC2, SMC3, SMC4, NCAPD2, NUMA1, RCC2, RANBP1, RUVBL1, SMC1A, DYNC1H1, KPNA2	252	329	13528	2.44753	0.987955	0.0500869	5.38845
GOTERM_BP_FAT	GO:0000226~microtubule cytoskeleton organization	8	2.77778	0.0198025	RANBP1, ARPC4, RCC1, DYNC1H1, SMC1A, UBE2C, SMC3, CTNNB1	252	147	13528	2.9215	1	0.185523	27.8676
GOTERM_BP_FAT	GO:0007017~microtubule-based process	10	3.47222	0.046709	RANBP1, ARPC4, RCC1, DYNC1H1, SMC1A, UBE2C, KPNA2, SMC3, LRPPRC, CTNNB1	252	253	13528	2.12184	1	0.331102	54.217
GOTERM_CC_FAT	GO:0000794~condensed nuclear chromosome	4	1.38889	0.0679837	RCC1, SMC1A, SMC3, LRPPRC	247	49	12782	4.22441	1	0.255214	61.6472
GOTERM_MF_FAT	GO:0003774~motor activity	6	2.08333	0.137648	DYNC1LI2, MYO6, MYO1B, DYNC1H1, SMC1A, SMC3	250	142	12983	2.19431	1	0.641838	87.4742
GOTERM_MF_FAT	GO:0003777~microtubule motor activity	3	1.04167	0.436392	DYNC1H1, SMC1A, SMC3	250	77	12983	2.02332	1	0.949291	99.9679
Annotation Cluster 31	Enrichment Score: 1.5786721825489296
Category	Term	Count	%	PValue	Genes	List Total	Pop Hits	Pop Total	Fold Enrichment	Bonferroni	Benjamini	FDR
GOTERM_MF_FAT	GO:0003924~GTPase activity	12	4.16667	0.0025347	TUFM, RAB2A, CDC42, RAB7A, GSPT1, RAB5C, ARF3, EFTUD2, ARF4, RAP1B, ARF6, ARF5	250	211	12983	2.95348	0.652077	0.0397933	3.49747
GOTERM_MF_FAT	GO:0005525~GTP binding	15	5.20833	0.0128105	TUFM, RAB2A, ADSS, RAB7A, RAB5C, EFTUD2, ARF6, ARF5, CDC42, NME2, GSPT1, ARF3, ARF4, RAP1B, GNL3	250	372	12983	2.09403	0.995316	0.142081	16.5449
GOTERM_MF_FAT	GO:0019001~guanyl nucleotide binding	15	5.20833	0.0156505	TUFM, RAB2A, ADSS, RAB7A, RAB5C, EFTUD2, ARF6, ARF5, CDC42, NME2, GSPT1, ARF3, ARF4, RAP1B, GNL3	250	382	12983	2.03921	0.998587	0.162516	19.8504
GOTERM_MF_FAT	GO:0032561~guanyl ribonucleotide binding	15	5.20833	0.0156505	TUFM, RAB2A, ADSS, RAB7A, RAB5C, EFTUD2, ARF6, ARF5, CDC42, NME2, GSPT1, ARF3, ARF4, RAP1B, GNL3	250	382	12983	2.03921	0.998587	0.162516	19.8504
GOTERM_BP_FAT	GO:0007264~small GTPase mediated signal transduction	11	3.81944	0.0584997	RAB2A, CDC42, RAB7A, RAB5C, ARF3, G3BP1, ARF4, RAP1B, ARF6, ARF5, IQGAP1	252	305	13528	1.93609	1	0.386062	62.6382
GOTERM_BP_FAT	GO:0007242~intracellular signaling cascade	22	7.63889	0.724882	RAB2A, RAB7A, MSH6, HMGB2, MYO6, MSH2, RAB5C, G3BP1, FHL2, ARF6, ARF5, UBE2C, STAT1, IQGAP1, CTNNB1, CDC42, ARF3, ARF4, ANP32A, RAP1B, SMC1A, TOP2A	252	1256	13528	0.940299	1	0.995277	100
Annotation Cluster 32	Enrichment Score: 1.490183411806989
Category	Term	Count	%	PValue	Genes	List Total	Pop Hits	Pop Total	Fold Enrichment	Bonferroni	Benjamini	FDR
GOTERM_MF_FAT	GO:0005048~signal sequence binding	4	1.38889	0.00624184	SRP14, KPNA2, KPNB1, TNPO1	250	20	12983	10.3864	0.926078	0.0805907	8.40859
GOTERM_MF_FAT	GO:0008139~nuclear localization sequence binding	3	1.04167	0.00721969	KPNA2, KPNB1, TNPO1	250	7	12983	22.2566	0.950919	0.0872945	9.66477
GOTERM_MF_FAT	GO:0042277~peptide binding	4	1.38889	0.750964	SRP14, KPNA2, KPNB1, TNPO1	250	203	12983	1.02329	1	0.997095	100
Annotation Cluster 33	Enrichment Score: 1.4599051858095606
Category	Term	Count	%	PValue	Genes	List Total	Pop Hits	Pop Total	Fold Enrichment	Bonferroni	Benjamini	FDR
GOTERM_BP_FAT	GO:0043254~regulation of protein complex assembly	8	2.77778	0.00140538	ACTR3, HMGB1, CDC42, SPTBN1, CAND1, ARF6, CAPZB, SPTAN1	252	90	13528	4.77178	0.839987	0.0258389	2.27075
GOTERM_BP_FAT	GO:0043244~regulation of protein complex disassembly	6	2.08333	0.00247517	UPF1, EIF5A, SPTBN1, CAPZB, SPTAN1, DSTN	252	51	13528	6.31559	0.960408	0.0410697	3.96671
GOTERM_BP_FAT	GO:0051493~regulation of cytoskeleton organization	9	3.125	0.0038483	ACTR3, XPO1, SPTBN1, RANBP1, ARF6, CAPZB, SPTAN1, CTNNB1, DSTN	252	136	13528	3.55252	0.993422	0.0548858	6.10311
GOTERM_BP_FAT	GO:0008064~regulation of actin polymerization or depolymerization	6	2.08333	0.00539792	ACTR3, SPTBN1, ARF6, CAPZB, SPTAN1, DSTN	252	61	13528	5.28025	0.999135	0.0701263	8.46047
GOTERM_BP_FAT	GO:0030832~regulation of actin filament length	6	2.08333	0.0061902	ACTR3, SPTBN1, ARF6, CAPZB, SPTAN1, DSTN	252	63	13528	5.11262	0.999694	0.0784758	9.64416
GOTERM_BP_FAT	GO:0033043~regulation of organelle organization	11	3.81944	0.00734899	ACTR3, CDC42, XPO1, SPTBN1, RANBP1, ARF6, RCC1, CAPZB, SPTAN1, CTNNB1, DSTN	252	217	13528	2.72123	0.999933	0.0890903	11.3496
GOTERM_BP_FAT	GO:0030834~regulation of actin filament depolymerization	4	1.38889	0.013289	SPTBN1, CAPZB, SPTAN1, DSTN	252	27	13528	7.95297	1	0.139527	19.6273
GOTERM_CC_FAT	GO:0030863~cortical cytoskeleton	5	1.73611	0.0144097	LASP1, SPTBN1, CAPZB, SPTAN1, DSTN	247	49	12782	5.28051	0.992704	0.0870909	17.9277
GOTERM_CC_FAT	GO:0030864~cortical actin cytoskeleton	4	1.38889	0.0161782	LASP1, SPTBN1, SPTAN1, DSTN	247	28	12782	7.39271	0.996031	0.0909291	19.9098
GOTERM_BP_FAT	GO:0044087~regulation of cellular component biogenesis	8	2.77778	0.0166968	ACTR3, HMGB1, CDC42, SPTBN1, CAND1, ARF6, CAPZB, SPTAN1	252	142	13528	3.02437	1	0.165831	24.0427
GOTERM_BP_FAT	GO:0030833~regulation of actin filament polymerization	5	1.73611	0.0177258	ACTR3, SPTBN1, ARF6, CAPZB, SPTAN1	252	54	13528	4.97061	1	0.170084	25.3306
GOTERM_CC_FAT	GO:0005938~cell cortex	8	2.77778	0.022824	MYO6, LASP1, SPTBN1, ARF6, CAPZB, SPTAN1, CTNNB1, DSTN	247	146	12782	2.83556	0.999601	0.111829	26.9683
GOTERM_BP_FAT	GO:0031333~negative regulation of protein complex assembly	4	1.38889	0.0247345	CDC42, SPTBN1, CAPZB, SPTAN1	252	34	13528	6.31559	1	0.21196	33.572
GOTERM_BP_FAT	GO:0032956~regulation of actin cytoskeleton organization	6	2.08333	0.0248748	ACTR3, SPTBN1, ARF6, CAPZB, SPTAN1, DSTN	252	89	13528	3.61905	1	0.211671	33.7279
GOTERM_BP_FAT	GO:0032970~regulation of actin filament-based process	6	2.08333	0.0282	ACTR3, SPTBN1, ARF6, CAPZB, SPTAN1, DSTN	252	92	13528	3.50104	1	0.226673	37.3239
GOTERM_BP_FAT	GO:0032271~regulation of protein polymerization	5	1.73611	0.0374162	ACTR3, SPTBN1, ARF6, CAPZB, SPTAN1	252	68	13528	3.94725	1	0.28198	46.357
GOTERM_BP_FAT	GO:0051693~actin filament capping	3	1.04167	0.0621002	SPTBN1, CAPZB, SPTAN1	252	22	13528	7.32035	1	0.402898	64.9046
GOTERM_BP_FAT	GO:0030835~negative regulation of actin filament depolymerization	3	1.04167	0.0724444	SPTBN1, CAPZB, SPTAN1	252	24	13528	6.71032	1	0.445836	70.719
GOTERM_CC_FAT	GO:0044448~cell cortex part	5	1.73611	0.0759425	LASP1, SPTBN1, CAPZB, SPTAN1, DSTN	247	83	12782	3.11741	1	0.270207	65.8729
GOTERM_BP_FAT	GO:0030837~negative regulation of actin filament polymerization	3	1.04167	0.094606	SPTBN1, CAPZB, SPTAN1	252	28	13528	5.7517	1	0.520872	80.2731
GOTERM_BP_FAT	GO:0032272~negative regulation of protein polymerization	3	1.04167	0.100417	SPTBN1, CAPZB, SPTAN1	252	29	13528	5.55337	1	0.539137	82.2423
GOTERM_BP_FAT	GO:0051130~positive regulation of cellular component organization	7	2.43056	0.120966	ACTR3, CDC42, EIF5A, RANBP1, CAND1, ARF6, DSTN	252	181	13528	2.07612	1	0.600692	87.8246
GOTERM_BP_FAT	GO:0051129~negative regulation of cellular component organization	6	2.08333	0.124623	HMGB1, CDC42, SPTBN1, ARF6, CAPZB, SPTAN1	252	142	13528	2.26828	1	0.610368	88.626
GOTERM_BP_FAT	GO:0043242~negative regulation of protein complex disassembly	3	1.04167	0.176208	SPTBN1, CAPZB, SPTAN1	252	41	13528	3.92799	1	0.733493	95.782
GOTERM_BP_FAT	GO:0010638~positive regulation of organelle organization	4	1.38889	0.199769	ACTR3, RANBP1, ARF6, DSTN	252	83	13528	2.58711	1	0.767577	97.3741
GOTERM_BP_FAT	GO:0051495~positive regulation of cytoskeleton organization	3	1.04167	0.203129	ACTR3, ARF6, DSTN	252	45	13528	3.57884	1	0.772206	97.5485
GOTERM_BP_FAT	GO:0032535~regulation of cellular component size	8	2.77778	0.239898	ACTR3, CYFIP1, SPTBN1, ARF6, CAPZB, XRN2, SPTAN1, DSTN	252	271	13528	1.58472	1	0.825092	98.8667
GOTERM_BP_FAT	GO:0051494~negative regulation of cytoskeleton organization	3	1.04167	0.271835	SPTBN1, CAPZB, SPTAN1	252	55	13528	2.92814	1	0.851151	99.4378
GOTERM_BP_FAT	GO:0010639~negative regulation of organelle organization	3	1.04167	0.451459	SPTBN1, CAPZB, SPTAN1	252	82	13528	1.964	1	0.954063	99.9945
Annotation Cluster 34	Enrichment Score: 1.2672482013564346
Category	Term	Count	%	PValue	Genes	List Total	Pop Hits	Pop Total	Fold Enrichment	Bonferroni	Benjamini	FDR
GOTERM_BP_FAT	GO:0016044~membrane organization	15	5.20833	0.0118147	SEC23A, RAB7A, COPA, SEC31A, MYO6, PDLIM7, VAPA, AP1G1, COPZ1, CORO1C, NME2, COPB1, ARCN1, SH3KBP1, AP3B1	252	381	13528	2.11349	1	0.127021	17.6432
GOTERM_BP_FAT	GO:0006897~endocytosis	8	2.77778	0.115589	CORO1C, RAB7A, NME2, MYO6, PDLIM7, AP1G1, SH3KBP1, AP3B1	252	220	13528	1.95209	1	0.584971	86.5495
GOTERM_BP_FAT	GO:0010324~membrane invagination	8	2.77778	0.115589	CORO1C, RAB7A, NME2, MYO6, PDLIM7, AP1G1, SH3KBP1, AP3B1	252	220	13528	1.95209	1	0.584971	86.5495
Annotation Cluster 35	Enrichment Score: 1.2538683136283277
Category	Term	Count	%	PValue	Genes	List Total	Pop Hits	Pop Total	Fold Enrichment	Bonferroni	Benjamini	FDR
GOTERM_BP_FAT	GO:0006323~DNA packaging	9	3.125	0.00150466	HMGB2, HP1BP3, SMARCA5, H2AFY, MCM2, TOP2A, SMC2, NCAPD2, SMC4	252	117	13528	4.12943	0.85943	0.0268828	2.42932
GOTERM_BP_FAT	GO:0006334~nucleosome assembly	5	1.73611	0.0708075	HMGB2, HP1BP3, SMARCA5, H2AFY, MCM2	252	84	13528	3.19539	1	0.442049	69.8636
GOTERM_BP_FAT	GO:0031497~chromatin assembly	5	1.73611	0.0783381	HMGB2, HP1BP3, SMARCA5, H2AFY, MCM2	252	87	13528	3.0852	1	0.466855	73.6141
GOTERM_BP_FAT	GO:0006333~chromatin assembly or disassembly	6	2.08333	0.0876489	HMGB2, HP1BP3, SMARCA5, H2AFY, MCM2, CHD4	252	127	13528	2.53618	1	0.502905	77.6461
GOTERM_BP_FAT	GO:0065004~protein-DNA complex assembly	5	1.73611	0.0889734	HMGB2, HP1BP3, SMARCA5, H2AFY, MCM2	252	91	13528	2.94959	1	0.502322	78.1703
GOTERM_BP_FAT	GO:0034728~nucleosome organization	5	1.73611	0.0945389	HMGB2, HP1BP3, SMARCA5, H2AFY, MCM2	252	93	13528	2.88616	1	0.522619	80.2492
GOTERM_BP_FAT	GO:0006325~chromatin organization	10	3.47222	0.271527	HMGB1, TBL1XR1, HMGB2, HP1BP3, SMARCA5, H2AFY, TRIM16, RUVBL1, MCM2, CHD4	252	378	13528	1.42017	1	0.852081	99.4339
Annotation Cluster 36	Enrichment Score: 1.1506633809843376
Category	Term	Count	%	PValue	Genes	List Total	Pop Hits	Pop Total	Fold Enrichment	Bonferroni	Benjamini	FDR
GOTERM_BP_FAT	GO:0006261~DNA-dependent DNA replication	5	1.73611	0.0224625	HMGB1, HMGB2, MCM2, MCM3, MCM4	252	58	13528	4.62781	1	0.20226	30.9989
GOTERM_BP_FAT	GO:0006270~DNA replication initiation	3	1.04167	0.0346755	MCM2, MCM3, MCM4	252	16	13528	10.0655	1	0.265539	43.8073
KEGG_PATHWAY	hsa04110:Cell cycle	6	2.08333	0.159928	PRKDC, MCM2, MCM3, SMC1A, MCM4, SMC3	118	125	5085	2.06847	1	0.777992	85.2741
KEGG_PATHWAY	hsa03030:DNA replication	3	1.04167	0.20042	MCM2, MCM3, MCM4	118	36	5085	3.5911	1	0.829787	91.4443
Annotation Cluster 37	Enrichment Score: 1.1482626561537173
Category	Term	Count	%	PValue	Genes	List Total	Pop Hits	Pop Total	Fold Enrichment	Bonferroni	Benjamini	FDR
GOTERM_CC_FAT	GO:0030119~AP-type membrane coat adaptor complex	4	1.38889	0.0194957	AP2B1, AP1G1, ARCN1, AP3S1	247	30	12782	6.89987	0.998737	0.102058	23.5087
GOTERM_CC_FAT	GO:0030131~clathrin adaptor complex	3	1.04167	0.106753	AP2B1, AP1G1, ARCN1	247	29	12782	5.35334	1	0.346378	78.4903
GOTERM_CC_FAT	GO:0030118~clathrin coat	3	1.04167	0.172542	AP2B1, AP1G1, ARCN1	247	39	12782	3.98069	1	0.491275	92.4077
Annotation Cluster 38	Enrichment Score: 1.093786048638369
Category	Term	Count	%	PValue	Genes	List Total	Pop Hits	Pop Total	Fold Enrichment	Bonferroni	Benjamini	FDR
GOTERM_MF_FAT	GO:0008536~Ran GTPase binding	3	1.04167	0.0213023	IPO7, IPO5, RANBP1	250	12	12983	12.983	0.999871	0.200635	26.0699
GOTERM_MF_FAT	GO:0017016~Ras GTPase binding	5	1.73611	0.0974985	INF2, IPO7, IPO5, CYFIP1, RANBP1	250	91	12983	2.85341	1	0.552999	76.2841
GOTERM_MF_FAT	GO:0031267~small GTPase binding	5	1.73611	0.129154	INF2, IPO7, IPO5, CYFIP1, RANBP1	250	101	12983	2.57089	1	0.635518	85.628
GOTERM_MF_FAT	GO:0051020~GTPase binding	5	1.73611	0.157153	INF2, IPO7, IPO5, CYFIP1, RANBP1	250	109	12983	2.3822	1	0.688376	90.9128
Annotation Cluster 39	Enrichment Score: 1.0805362267104324
Category	Term	Count	%	PValue	Genes	List Total	Pop Hits	Pop Total	Fold Enrichment	Bonferroni	Benjamini	FDR
GOTERM_MF_FAT	GO:0005080~protein kinase C binding	4	1.38889	0.00819779	HINT1, PDLIM5, TOP2B, TOP2A	250	22	12983	9.44218	0.967429	0.09581	10.9052
GOTERM_MF_FAT	GO:0019900~kinase binding	7	2.43056	0.129965	PFKL, HINT1, PDLIM5, PFKM, TOP2B, TOP2A, CTNNB1	250	179	12983	2.03086	1	0.631589	85.8145
GOTERM_MF_FAT	GO:0019901~protein kinase binding	4	1.38889	0.538107	HINT1, PDLIM5, TOP2B, TOP2A	250	147	12983	1.41312	1	0.97616	99.998
Annotation Cluster 40	Enrichment Score: 1.0715528457045997
Category	Term	Count	%	PValue	Genes	List Total	Pop Hits	Pop Total	Fold Enrichment	Bonferroni	Benjamini	FDR
GOTERM_BP_FAT	GO:0007051~spindle organization	6	2.08333	0.00140865	RANBP1, RCC1, DYNC1H1, SMC1A, UBE2C, SMC3	252	45	13528	7.15767	0.840668	0.0255382	2.27597
GOTERM_BP_FAT	GO:0010564~regulation of cell cycle process	5	1.73611	0.161912	CDC42, XPO1, RANBP1, RCC1, UBE2C	252	114	13528	2.3545	1	0.702199	94.4135
GOTERM_BP_FAT	GO:0051726~regulation of cell cycle	8	2.77778	0.421419	CDC42, XPO1, MSH2, DDB1, RANBP1, RCC1, SMC1A, UBE2C	252	331	13528	1.29746	1	0.942265	99.9869
GOTERM_BP_FAT	GO:0007346~regulation of mitotic cell cycle	4	1.38889	0.538259	CDC42, RANBP1, RCC1, UBE2C	252	152	13528	1.4127	1	0.975989	99.9997
Annotation Cluster 41	Enrichment Score: 1.0069446371055972
Category	Term	Count	%	PValue	Genes	List Total	Pop Hits	Pop Total	Fold Enrichment	Bonferroni	Benjamini	FDR
GOTERM_MF_FAT	GO:0016209~antioxidant activity	4	1.38889	0.0609932	TXNDC17, PRDX6, PRDX5, TXNRD1	250	47	12983	4.41974	1	0.427086	58.6375
GOTERM_MF_FAT	GO:0016684~oxidoreductase activity, acting on peroxide as acceptor	3	1.04167	0.125009	TXNDC17, PRDX6, PRDX5	250	32	12983	4.86862	1	0.629175	84.6381
GOTERM_MF_FAT	GO:0004601~peroxidase activity	3	1.04167	0.125009	TXNDC17, PRDX6, PRDX5	250	32	12983	4.86862	1	0.629175	84.6381
Annotation Cluster 42	Enrichment Score: 0.9876272090578629
Category	Term	Count	%	PValue	Genes	List Total	Pop Hits	Pop Total	Fold Enrichment	Bonferroni	Benjamini	FDR
GOTERM_BP_FAT	GO:0007059~chromosome segregation	6	2.08333	0.017276	SMC1A, TOP2A, SMC2, SMC3, NCAPD2, SMC4	252	81	13528	3.97648	1	0.168574	24.7702
GOTERM_MF_FAT	GO:0046982~protein heterodimerization activity	8	2.77778	0.105861	VAPA, ALG2, TOP2B, SMC1A, TOP2A, SMC2, SMC3, SMC4	250	208	12983	1.99738	1	0.577683	79.1874
GOTERM_MF_FAT	GO:0046983~protein dimerization activity	11	3.81944	0.595579	G6PD, AIMP1, VAPA, MSH2, ALG2, TOP2B, SMC1A, TOP2A, SMC2, SMC3, SMC4	250	542	12983	1.05397	1	0.98477	99.9997
Annotation Cluster 43	Enrichment Score: 0.9478196349035186
Category	Term	Count	%	PValue	Genes	List Total	Pop Hits	Pop Total	Fold Enrichment	Bonferroni	Benjamini	FDR
GOTERM_BP_FAT	GO:0030858~positive regulation of epithelial cell differentiation	3	1.04167	0.0139867	NME2, TRIM16, CTNNB1	252	10	13528	16.1048	1	0.145181	20.5504
GOTERM_BP_FAT	GO:0030856~regulation of epithelial cell differentiation	3	1.04167	0.100417	NME2, TRIM16, CTNNB1	252	29	13528	5.55337	1	0.539137	82.2423
GOTERM_BP_FAT	GO:0045597~positive regulation of cell differentiation	8	2.77778	0.1344	ACTR3, NME2, SMAP1, PDLIM7, AP3D1, TRIM16, CTNNB1, AP3B1	252	229	13528	1.87537	1	0.634211	90.5324
GOTERM_BP_FAT	GO:0051094~positive regulation of developmental process	8	2.77778	0.258293	ACTR3, NME2, SMAP1, PDLIM7, AP3D1, TRIM16, CTNNB1, AP3B1	252	278	13528	1.54482	1	0.843389	99.2404
GOTERM_BP_FAT	GO:0045637~regulation of myeloid cell differentiation	3	1.04167	0.373995	NME2, SMAP1, CTNNB1	252	70	13528	2.30068	1	0.92137	99.9524
Annotation Cluster 44	Enrichment Score: 0.9108119966645231
Category	Term	Count	%	PValue	Genes	List Total	Pop Hits	Pop Total	Fold Enrichment	Bonferroni	Benjamini	FDR
KEGG_PATHWAY	hsa03018:RNA degradation	5	1.73611	0.0413116	DIS3, EXOSC10, CNOT1, XRN2, DDX6	118	57	5085	3.78011	0.98183	0.435924	37.1076
GOTERM_MF_FAT	GO:0004527~exonuclease activity	4	1.38889	0.0811827	DIS3, EXOSC10, APEX1, XRN2	250	53	12983	3.9194	1	0.505614	69.5076
GOTERM_MF_FAT	GO:0004518~nuclease activity	6	2.08333	0.187206	DIS3, EXOSC10, NME2, G3BP1, APEX1, XRN2	250	158	12983	1.9721	1	0.729227	94.5394
GOTERM_MF_FAT	GO:0004540~ribonuclease activity	3	1.04167	0.362157	DIS3, APEX1, XRN2	250	66	12983	2.36055	1	0.914677	99.8178
Annotation Cluster 45	Enrichment Score: 0.8891102952694147
Category	Term	Count	%	PValue	Genes	List Total	Pop Hits	Pop Total	Fold Enrichment	Bonferroni	Benjamini	FDR
GOTERM_BP_FAT	GO:0043038~amino acid activation	4	1.38889	0.0534409	IARS, AIMP1, RARS, FARSB	252	46	13528	4.66805	1	0.360629	59.2209
GOTERM_BP_FAT	GO:0043039~tRNA aminoacylation	4	1.38889	0.0534409	IARS, AIMP1, RARS, FARSB	252	46	13528	4.66805	1	0.360629	59.2209
GOTERM_BP_FAT	GO:0006418~tRNA aminoacylation for protein translation	4	1.38889	0.0534409	IARS, AIMP1, RARS, FARSB	252	46	13528	4.66805	1	0.360629	59.2209
GOTERM_BP_FAT	GO:0006399~tRNA metabolic process	5	1.73611	0.176347	IARS, AIMP1, RARS, FARSB, NSUN2	252	118	13528	2.27468	1	0.731959	95.7936
GOTERM_MF_FAT	GO:0016876~ligase activity, forming aminoacyl-tRNA and related compounds	3	1.04167	0.22759	IARS, RARS, FARSB	250	47	12983	3.31481	1	0.789217	97.3284
GOTERM_MF_FAT	GO:0016875~ligase activity, forming carbon-oxygen bonds	3	1.04167	0.22759	IARS, RARS, FARSB	250	47	12983	3.31481	1	0.789217	97.3284
GOTERM_MF_FAT	GO:0004812~aminoacyl-tRNA ligase activity	3	1.04167	0.22759	IARS, RARS, FARSB	250	47	12983	3.31481	1	0.789217	97.3284
KEGG_PATHWAY	hsa00970:Aminoacyl-tRNA biosynthesis	3	1.04167	0.243034	IARS, RARS, FARSB	118	41	5085	3.15316	1	0.828545	95.314
Annotation Cluster 46	Enrichment Score: 0.7669238441148724
Category	Term	Count	%	PValue	Genes	List Total	Pop Hits	Pop Total	Fold Enrichment	Bonferroni	Benjamini	FDR
GOTERM_BP_FAT	GO:0070647~protein modification by small protein conjugation or removal	7	2.43056	0.0777179	PSMD14, VCP, GSPT1, DDB1, UBE2M, CAND1, UBE2C	252	160	13528	2.34861	1	0.468071	73.3225
GOTERM_BP_FAT	GO:0032446~protein modification by small protein conjugation	6	2.08333	0.099251	VCP, GSPT1, DDB1, UBE2M, CAND1, UBE2C	252	132	13528	2.44012	1	0.536754	81.8626
GOTERM_BP_FAT	GO:0016567~protein ubiquitination	5	1.73611	0.180023	VCP, GSPT1, DDB1, CAND1, UBE2C	252	119	13528	2.25557	1	0.738152	96.09
KEGG_PATHWAY	hsa04120:Ubiquitin mediated proteolysis	4	1.38889	0.616198	CUL4A, DDB1, UBE2M, UBE2C	118	137	5085	1.2582	1	0.984001	99.9973
Annotation Cluster 47	Enrichment Score: 0.7548292481599073
Category	Term	Count	%	PValue	Genes	List Total	Pop Hits	Pop Total	Fold Enrichment	Bonferroni	Benjamini	FDR
GOTERM_CC_FAT	GO:0016585~chromatin remodeling complex	4	1.38889	0.156537	TBL1XR1, CSNK2A1, SMARCA5, CHD4	247	71	12782	2.91544	1	0.46235	90.1457
GOTERM_CC_FAT	GO:0000118~histone deacetylase complex	3	1.04167	0.186401	TBL1XR1, CSNK2A1, CHD4	247	41	12782	3.78651	1	0.517345	93.9672
GOTERM_CC_FAT	GO:0017053~transcriptional repressor complex	3	1.04167	0.186401	TBL1XR1, CSNK2A1, CHD4	247	41	12782	3.78651	1	0.517345	93.9672
Annotation Cluster 48	Enrichment Score: 0.7260333015379458
Category	Term	Count	%	PValue	Genes	List Total	Pop Hits	Pop Total	Fold Enrichment	Bonferroni	Benjamini	FDR
GOTERM_CC_FAT	GO:0009295~nucleoid	5	1.73611	0.00279969	TUFM, LRRC59, DHX30, LRPPRC, HADHB	247	31	12782	8.34661	0.613424	0.0240754	3.74434
GOTERM_CC_FAT	GO:0042645~mitochondrial nucleoid	5	1.73611	0.00279969	TUFM, LRRC59, DHX30, LRPPRC, HADHB	247	31	12782	8.34661	0.613424	0.0240754	3.74434
KEGG_PATHWAY	hsa00071:Fatty acid metabolism	3	1.04167	0.234461	ACSL3, ALDH3A2, HADHB	118	40	5085	3.23199	1	0.836832	94.6965
GOTERM_CC_FAT	GO:0031980~mitochondrial lumen	7	2.43056	0.271959	TUFM, C1QBP, LRRC59, DLAT, DHX30, LRPPRC, HADHB	247	227	12782	1.59578	1	0.659036	98.6705
GOTERM_CC_FAT	GO:0005759~mitochondrial matrix	7	2.43056	0.271959	TUFM, C1QBP, LRRC59, DLAT, DHX30, LRPPRC, HADHB	247	227	12782	1.59578	1	0.659036	98.6705
GOTERM_CC_FAT	GO:0019866~organelle inner membrane	8	2.77778	0.452989	IMMT, CHCHD3, CSDE1, STOML2, MATR3, ALDH3A2, LRPPRC, HADHB	247	329	12782	1.25833	1	0.838947	99.9729
GOTERM_CC_FAT	GO:0044429~mitochondrial part	13	4.51389	0.477473	TUFM, IMMT, CHCHD3, STOML2, DLAT, ALDH3A2, HADHB, C1QBP, LRRC59, CSDE1, DHX30, ACSL3, LRPPRC	247	595	12782	1.13065	1	0.857332	99.9854
GOTERM_CC_FAT	GO:0005743~mitochondrial inner membrane	6	2.08333	0.705557	IMMT, CHCHD3, CSDE1, STOML2, ALDH3A2, HADHB	247	306	12782	1.01469	1	0.965603	100
GOTERM_CC_FAT	GO:0031966~mitochondrial membrane	7	2.43056	0.77445	IMMT, CHCHD3, CSDE1, STOML2, ACSL3, ALDH3A2, HADHB	247	394	12782	0.919398	1	0.981223	100
GOTERM_CC_FAT	GO:0005739~mitochondrion	19	6.59722	0.781696	TUFM, ABCE1, IMMT, ALDOC, CHCHD3, STOML2, PRDX5, ILF3, DLAT, ALDH3A2, HADHB, PYCR1, C1QBP, LRRC59, CSDE1, DHX30, ACSL3, LRPPRC, DUT	247	1087	12782	0.904536	1	0.982236	100
GOTERM_CC_FAT	GO:0005740~mitochondrial envelope	7	2.43056	0.821742	IMMT, CHCHD3, CSDE1, STOML2, ACSL3, ALDH3A2, HADHB	247	419	12782	0.864542	1	0.988858	100
Annotation Cluster 49	Enrichment Score: 0.7025100540015945
Category	Term	Count	%	PValue	Genes	List Total	Pop Hits	Pop Total	Fold Enrichment	Bonferroni	Benjamini	FDR
GOTERM_BP_FAT	GO:0034599~cellular response to oxidative stress	4	1.38889	0.0452167	PYCR1, G6PD, PRDX6, PRDX5	252	43	13528	4.99372	1	0.325685	53.0323
GOTERM_BP_FAT	GO:0006979~response to oxidative stress	6	2.08333	0.18943	PYCR1, G6PD, PRDX6, PRDX5, PDLIM1, STAT1	252	164	13528	1.964	1	0.7507	96.7615
GOTERM_BP_FAT	GO:0055114~oxidation reduction	9	3.125	0.911428	PYCR1, LDHA, G6PD, SORD, PRDX6, PRDX5, TXNRD1, GAPDH, ALDH3A2	252	639	13528	0.756092	1	0.999889	100
Annotation Cluster 50	Enrichment Score: 0.6840469599619211
Category	Term	Count	%	PValue	Genes	List Total	Pop Hits	Pop Total	Fold Enrichment	Bonferroni	Benjamini	FDR
GOTERM_BP_FAT	GO:0009168~purine ribonucleoside monophosphate biosynthetic process	3	1.04167	0.0431565	ADSS, ATIC, GART	252	18	13528	8.94709	1	0.314888	51.3494
GOTERM_BP_FAT	GO:0009127~purine nucleoside monophosphate biosynthetic process	3	1.04167	0.0431565	ADSS, ATIC, GART	252	18	13528	8.94709	1	0.314888	51.3494
GOTERM_BP_FAT	GO:0009167~purine ribonucleoside monophosphate metabolic process	3	1.04167	0.0523184	ADSS, ATIC, GART	252	20	13528	8.05238	1	0.356202	58.4239
GOTERM_BP_FAT	GO:0009126~purine nucleoside monophosphate metabolic process	3	1.04167	0.0523184	ADSS, ATIC, GART	252	20	13528	8.05238	1	0.356202	58.4239
GOTERM_BP_FAT	GO:0009156~ribonucleoside monophosphate biosynthetic process	3	1.04167	0.0672055	ADSS, ATIC, GART	252	23	13528	7.00207	1	0.426579	67.8978
GOTERM_BP_FAT	GO:0009161~ribonucleoside monophosphate metabolic process	3	1.04167	0.0778103	ADSS, ATIC, GART	252	25	13528	6.4419	1	0.466484	73.3662
GOTERM_BP_FAT	GO:0009124~nucleoside monophosphate biosynthetic process	3	1.04167	0.237346	ADSS, ATIC, GART	252	50	13528	3.22095	1	0.824331	98.8029
GOTERM_BP_FAT	GO:0009150~purine ribonucleotide metabolic process	5	1.73611	0.254008	ADSS, NME2, ATIC, ACLY, GART	252	138	13528	1.94502	1	0.839096	99.1655
GOTERM_BP_FAT	GO:0006163~purine nucleotide metabolic process	6	2.08333	0.26416	ADSS, NME2, ATIC, MSH2, ACLY, GART	252	186	13528	1.73169	1	0.846868	99.3328
GOTERM_BP_FAT	GO:0009259~ribonucleotide metabolic process	5	1.73611	0.291038	ADSS, NME2, ATIC, ACLY, GART	252	147	13528	1.82594	1	0.864768	99.6366
GOTERM_BP_FAT	GO:0006164~purine nucleotide biosynthetic process	5	1.73611	0.295201	ADSS, NME2, ATIC, MSH2, GART	252	148	13528	1.8136	1	0.868135	99.67
GOTERM_BP_FAT	GO:0009123~nucleoside monophosphate metabolic process	3	1.04167	0.347169	ADSS, ATIC, GART	252	66	13528	2.44012	1	0.905053	99.9055
GOTERM_BP_FAT	GO:0009152~purine ribonucleotide biosynthetic process	4	1.38889	0.370058	ADSS, NME2, ATIC, GART	252	117	13528	1.8353	1	0.919497	99.9473
GOTERM_BP_FAT	GO:0009260~ribonucleotide biosynthetic process	4	1.38889	0.40524	ADSS, NME2, ATIC, GART	252	124	13528	1.73169	1	0.936211	99.9794
GOTERM_BP_FAT	GO:0009165~nucleotide biosynthetic process	5	1.73611	0.455401	ADSS, NME2, ATIC, MSH2, GART	252	186	13528	1.44308	1	0.955187	99.9951
GOTERM_BP_FAT	GO:0034404~nucleobase, nucleoside and nucleotide biosynthetic process	5	1.73611	0.482462	ADSS, NME2, ATIC, MSH2, GART	252	193	13528	1.39074	1	0.962683	99.9979
GOTERM_BP_FAT	GO:0034654~nucleobase, nucleoside, nucleotide and nucleic acid biosynthetic process	5	1.73611	0.482462	ADSS, NME2, ATIC, MSH2, GART	252	193	13528	1.39074	1	0.962683	99.9979
KEGG_PATHWAY	hsa00230:Purine metabolism	4	1.38889	0.690374	ADSS, NME2, ATIC, GART	118	153	5085	1.12662	1	0.990349	99.9997
GOTERM_BP_FAT	GO:0044271~nitrogen compound biosynthetic process	6	2.08333	0.72473	ADSS, PYCR1, NME2, ATIC, MSH2, GART	252	325	13528	0.991062	1	0.995347	100
Annotation Cluster 51	Enrichment Score: 0.6199413543302973
Category	Term	Count	%	PValue	Genes	List Total	Pop Hits	Pop Total	Fold Enrichment	Bonferroni	Benjamini	FDR
GOTERM_BP_FAT	GO:0016447~somatic recombination of immunoglobulin gene segments	3	1.04167	0.0431565	MSH6, MSH2, PRKDC	252	18	13528	8.94709	1	0.314888	51.3494
GOTERM_BP_FAT	GO:0006310~DNA recombination	6	2.08333	0.0457812	HMGB1, MSH6, MSH2, PRKDC, RUVBL1, BANF1	252	105	13528	3.06757	1	0.327332	53.4838
GOTERM_BP_FAT	GO:0016445~somatic diversification of immunoglobulins	3	1.04167	0.0621002	MSH6, MSH2, PRKDC	252	22	13528	7.32035	1	0.402898	64.9046
GOTERM_BP_FAT	GO:0002562~somatic diversification of immune receptors via germline recombination within a single locus	3	1.04167	0.0724444	MSH6, MSH2, PRKDC	252	24	13528	6.71032	1	0.445836	70.719
GOTERM_BP_FAT	GO:0016444~somatic cell DNA recombination	3	1.04167	0.0724444	MSH6, MSH2, PRKDC	252	24	13528	6.71032	1	0.445836	70.719
GOTERM_BP_FAT	GO:0002200~somatic diversification of immune receptors	3	1.04167	0.0888972	MSH6, MSH2, PRKDC	252	27	13528	5.96473	1	0.504014	78.1404
GOTERM_BP_FAT	GO:0002377~immunoglobulin production	3	1.04167	0.106325	MSH6, MSH2, PRKDC	252	30	13528	5.36825	1	0.558814	84.0539
GOTERM_BP_FAT	GO:0002440~production of molecular mediator of immune response	3	1.04167	0.112323	MSH6, MSH2, PRKDC	252	31	13528	5.19508	1	0.575876	85.7149
GOTERM_BP_FAT	GO:0042770~DNA damage response, signal transduction	4	1.38889	0.18561	MSH6, MYO6, MSH2, SMC1A	252	80	13528	2.68413	1	0.746384	96.5031
GOTERM_BP_FAT	GO:0042113~B cell activation	3	1.04167	0.413357	MSH6, MSH2, PRKDC	252	76	13528	2.11905	1	0.938635	99.9835
GOTERM_BP_FAT	GO:0002520~immune system development	6	2.08333	0.584226	CDC42, MSH6, G6PD, MSH2, PRKDC, CTNNB1	252	276	13528	1.16701	1	0.98191	99.9999
GOTERM_BP_FAT	GO:0002252~immune effector process	3	1.04167	0.714266	MSH6, MSH2, PRKDC	252	134	13528	1.20185	1	0.995092	100
GOTERM_BP_FAT	GO:0046649~lymphocyte activation	4	1.38889	0.718064	MSH6, MSH2, PRKDC, CTNNB1	252	199	13528	1.07905	1	0.995115	100
GOTERM_BP_FAT	GO:0009314~response to radiation	4	1.38889	0.721224	MSH6, MSH2, PRKDC, SMC1A	252	200	13528	1.07365	1	0.99526	100
GOTERM_BP_FAT	GO:0009628~response to abiotic stimulus	6	2.08333	0.817111	MSH6, MSH2, PRKDC, SMC1A, STAT1, MYOF	252	368	13528	0.875259	1	0.998804	100
GOTERM_BP_FAT	GO:0045321~leukocyte activation	4	1.38889	0.830452	MSH6, MSH2, PRKDC, CTNNB1	252	242	13528	0.887315	1	0.999055	100
GOTERM_BP_FAT	GO:0001775~cell activation	4	1.38889	0.904741	MSH6, MSH2, PRKDC, CTNNB1	252	287	13528	0.748189	1	0.999864	100
GOTERM_BP_FAT	GO:0006955~immune response	6	2.08333	0.996572	MSH6, GPI, C1QBP, OTUB1, MSH2, PRKDC	252	690	13528	0.466805	1	1	100
Annotation Cluster 52	Enrichment Score: 0.615466677209598
Category	Term	Count	%	PValue	Genes	List Total	Pop Hits	Pop Total	Fold Enrichment	Bonferroni	Benjamini	FDR
GOTERM_BP_FAT	GO:0046364~monosaccharide biosynthetic process	3	1.04167	0.149935	GPI, G6PD, SORD	252	37	13528	4.35264	1	0.673689	92.9564
GOTERM_BP_FAT	GO:0046165~alcohol biosynthetic process	3	1.04167	0.196351	GPI, G6PD, SORD	252	44	13528	3.66017	1	0.762721	97.1848
GOTERM_BP_FAT	GO:0016051~carbohydrate biosynthetic process	4	1.38889	0.319259	GPI, G6PD, SORD, ALG2	252	107	13528	2.00682	1	0.885738	99.8128
GOTERM_BP_FAT	GO:0034637~cellular carbohydrate biosynthetic process	3	1.04167	0.367328	GPI, G6PD, SORD	252	69	13528	2.33402	1	0.918437	99.9434
Annotation Cluster 53	Enrichment Score: 0.5860527112803089
Category	Term	Count	%	PValue	Genes	List Total	Pop Hits	Pop Total	Fold Enrichment	Bonferroni	Benjamini	FDR
GOTERM_CC_FAT	GO:0005911~cell-cell junction	8	2.77778	0.0744288	TLN1, TJP1, MTDH, VAPA, CNN2, SPTAN1, CTNNB1, VCL	247	190	12782	2.1789	1	0.273671	65.104
GOTERM_CC_FAT	GO:0043296~apical junction complex	4	1.38889	0.297339	TJP1, MTDH, VAPA, CTNNB1	247	99	12782	2.09087	1	0.694078	99.1798
GOTERM_CC_FAT	GO:0016327~apicolateral plasma membrane	4	1.38889	0.31316	TJP1, MTDH, VAPA, CTNNB1	247	102	12782	2.02937	1	0.713065	99.3984
GOTERM_CC_FAT	GO:0005923~tight junction	3	1.04167	0.411612	TJP1, MTDH, VAPA	247	73	12782	2.12667	1	0.816617	99.9268
GOTERM_CC_FAT	GO:0070160~occluding junction	3	1.04167	0.411612	TJP1, MTDH, VAPA	247	73	12782	2.12667	1	0.816617	99.9268
Annotation Cluster 54	Enrichment Score: 0.5648324975668094
Category	Term	Count	%	PValue	Genes	List Total	Pop Hits	Pop Total	Fold Enrichment	Bonferroni	Benjamini	FDR
GOTERM_BP_FAT	GO:0012501~programmed cell death	15	5.20833	0.246015	AIMP1, MSH2, ALDOC, PRKDC, ARF6, STAT1, FXR1, CTNNB1, CSE1L, VCP, GSPT1, TIA1, SH3KBP1, TOP2A, PUF60	252	611	13528	1.3179	1	0.832394	99.0068
GOTERM_BP_FAT	GO:0008219~cell death	17	5.90278	0.25931	FUS, AIMP1, MSH2, ALDOC, PRKDC, ARF6, STAT1, CTNNB1, FXR1, EIF4G2, CSE1L, VCP, GSPT1, TIA1, SH3KBP1, TOP2A, PUF60	252	719	13528	1.26927	1	0.84334	99.2572
GOTERM_BP_FAT	GO:0016265~death	17	5.90278	0.263318	FUS, AIMP1, MSH2, ALDOC, PRKDC, ARF6, STAT1, CTNNB1, FXR1, EIF4G2, CSE1L, VCP, GSPT1, TIA1, SH3KBP1, TOP2A, PUF60	252	724	13528	1.2605	1	0.847147	99.3202
GOTERM_BP_FAT	GO:0006915~apoptosis	14	4.86111	0.327649	AIMP1, MSH2, ALDOC, ARF6, STAT1, FXR1, CTNNB1, CSE1L, VCP, GSPT1, TIA1, SH3KBP1, TOP2A, PUF60	252	602	13528	1.24843	1	0.89139	99.8472
Annotation Cluster 55	Enrichment Score: 0.5474149142428635
Category	Term	Count	%	PValue	Genes	List Total	Pop Hits	Pop Total	Fold Enrichment	Bonferroni	Benjamini	FDR
GOTERM_MF_FAT	GO:0016209~antioxidant activity	4	1.38889	0.0609932	TXNDC17, PRDX6, PRDX5, TXNRD1	250	47	12983	4.41974	1	0.427086	58.6375
GOTERM_BP_FAT	GO:0045454~cell redox homeostasis	4	1.38889	0.111753	PRDX6, PRDX5, TXNRD1, APEX1	252	63	13528	3.40842	1	0.575927	85.5644
GOTERM_BP_FAT	GO:0042592~homeostatic process	9	3.125	0.971719	PTGES3, G6PD, PRDX6, PRKDC, PRDX5, TXNRD1, PFKM, APEX1, CTNNB1	252	751	13528	0.643333	1	0.999996	100
GOTERM_BP_FAT	GO:0019725~cellular homeostasis	5	1.73611	0.975568	PRDX6, PRDX5, TXNRD1, PFKM, APEX1	252	466	13528	0.575993	1	0.999997	100
Annotation Cluster 56	Enrichment Score: 0.5273610207159481
Category	Term	Count	%	PValue	Genes	List Total	Pop Hits	Pop Total	Fold Enrichment	Bonferroni	Benjamini	FDR
GOTERM_BP_FAT	GO:0000082~G1/S transition of mitotic cell cycle	3	1.04167	0.278736	CUL4A, GSPT1, RCC1	252	56	13528	2.87585	1	0.856882	99.5188
GOTERM_BP_FAT	GO:0051329~interphase of mitotic cell cycle	4	1.38889	0.298922	CUL4A, GSPT1, RCC1, KPNA2	252	103	13528	2.08476	1	0.870947	99.6973
GOTERM_BP_FAT	GO:0051325~interphase	4	1.38889	0.314171	CUL4A, GSPT1, RCC1, KPNA2	252	106	13528	2.02576	1	0.881933	99.7886
Annotation Cluster 57	Enrichment Score: 0.49028353269263464
Category	Term	Count	%	PValue	Genes	List Total	Pop Hits	Pop Total	Fold Enrichment	Bonferroni	Benjamini	FDR
GOTERM_MF_FAT	GO:0003697~single-stranded DNA binding	6	2.08333	0.00397136	FUBP1, HMGB2, MSH2, MCM4, LRPPRC, YBX1	250	55	12983	5.66531	0.80898	0.0574069	5.42905
GOTERM_MF_FAT	GO:0043566~structure-specific DNA binding	8	2.77778	0.0217213	FUBP1, MSH6, HMGB2, MSH2, MCM4, LRPPRC, YBX1, CTNNB1	250	145	12983	2.86521	0.999892	0.199741	26.5126
GOTERM_MF_FAT	GO:0003690~double-stranded DNA binding	5	1.73611	0.116017	MSH6, HMGB2, MSH2, YBX1, CTNNB1	250	97	12983	2.67691	1	0.606522	82.2691
GOTERM_BP_FAT	GO:0002521~leukocyte differentiation	4	1.38889	0.439834	CDC42, MSH2, PRKDC, CTNNB1	252	131	13528	1.63916	1	0.949443	99.9922
GOTERM_BP_FAT	GO:0030098~lymphocyte differentiation	3	1.04167	0.572775	MSH2, PRKDC, CTNNB1	252	103	13528	1.56357	1	0.980072	99.9999
KEGG_PATHWAY	hsa05210:Colorectal cancer	3	1.04167	0.580667	MSH6, MSH2, CTNNB1	118	84	5085	1.53904	1	0.980388	99.9929
GOTERM_BP_FAT	GO:0002520~immune system development	6	2.08333	0.584226	CDC42, MSH6, G6PD, MSH2, PRKDC, CTNNB1	252	276	13528	1.16701	1	0.98191	99.9999
GOTERM_BP_FAT	GO:0030097~hemopoiesis	5	1.73611	0.641225	CDC42, G6PD, MSH2, PRKDC, CTNNB1	252	236	13528	1.13734	1	0.989194	100
GOTERM_BP_FAT	GO:0048534~hemopoietic or lymphoid organ development	5	1.73611	0.714622	CDC42, G6PD, MSH2, PRKDC, CTNNB1	252	260	13528	1.03236	1	0.995032	100
GOTERM_BP_FAT	GO:0046649~lymphocyte activation	4	1.38889	0.718064	MSH6, MSH2, PRKDC, CTNNB1	252	199	13528	1.07905	1	0.995115	100
GOTERM_BP_FAT	GO:0045165~cell fate commitment	3	1.04167	0.73301	CDC42, PRKDC, CTNNB1	252	139	13528	1.15862	1	0.995683	100
GOTERM_BP_FAT	GO:0045321~leukocyte activation	4	1.38889	0.830452	MSH6, MSH2, PRKDC, CTNNB1	252	242	13528	0.887315	1	0.999055	100
KEGG_PATHWAY	hsa05200:Pathways in cancer	6	2.08333	0.882477	CDC42, MSH6, MSH2, CTNNA1, STAT1, CTNNB1	118	328	5085	0.788291	1	0.9996	100
GOTERM_BP_FAT	GO:0001775~cell activation	4	1.38889	0.904741	MSH6, MSH2, PRKDC, CTNNB1	252	287	13528	0.748189	1	0.999864	100
Annotation Cluster 58	Enrichment Score: 0.4380005645420546
Category	Term	Count	%	PValue	Genes	List Total	Pop Hits	Pop Total	Fold Enrichment	Bonferroni	Benjamini	FDR
GOTERM_MF_FAT	GO:0050681~androgen receptor binding	3	1.04167	0.0881429	FHL2, PRPF6, CTNNB1	250	26	12983	5.99215	1	0.528884	72.5927
GOTERM_MF_FAT	GO:0035258~steroid hormone receptor binding	3	1.04167	0.164781	FHL2, PRPF6, CTNNB1	250	38	12983	4.09989	1	0.695468	92.0009
GOTERM_MF_FAT	GO:0016563~transcription activator activity	10	3.47222	0.387997	TBL1XR1, SMARCA5, FHL2, CAND1, TRIM16, PDLIM1, ILF3, APEX1, PRPF6, CTNNB1	250	410	12983	1.26663	1	0.929544	99.898
GOTERM_MF_FAT	GO:0035257~nuclear hormone receptor binding	3	1.04167	0.436392	FHL2, PRPF6, CTNNB1	250	77	12983	2.02332	1	0.949291	99.9679
GOTERM_MF_FAT	GO:0051427~hormone receptor binding	3	1.04167	0.505735	FHL2, PRPF6, CTNNB1	250	88	12983	1.77041	1	0.970751	99.9949
GOTERM_MF_FAT	GO:0008134~transcription factor binding	11	3.81944	0.514086	HMGB1, TBL1XR1, MTDH, FHL2, PRKDC, PDLIM1, APEX1, MYBBP1A, CHD4, PRPF6, CTNNB1	250	513	12983	1.11355	1	0.971964	99.996
GOTERM_MF_FAT	GO:0003713~transcription coactivator activity	5	1.73611	0.590402	FHL2, PDLIM1, APEX1, PRPF6, CTNNB1	250	214	12983	1.21336	1	0.984579	99.9996
GOTERM_MF_FAT	GO:0003712~transcription cofactor activity	6	2.08333	0.830021	TBL1XR1, FHL2, PDLIM1, APEX1, PRPF6, CTNNB1	250	363	12983	0.85838	1	0.998982	100
Annotation Cluster 59	Enrichment Score: 0.4259688877758705
Category	Term	Count	%	PValue	Genes	List Total	Pop Hits	Pop Total	Fold Enrichment	Bonferroni	Benjamini	FDR
GOTERM_CC_FAT	GO:0000267~cell fraction	26	9.02778	0.196332	COPA, SORD, VAPA, ALG2, PDLIM5, SYNCRIP, ARF6, RANGAP1, CTNNB1, IARS, EBNA1BP2, LRRC59, ACSL3, PLEC, PFKL, FMR1, PFKM, CAPN2, NME2, VCP, IPO7, RARS, FARSB, SH3KBP1, CYFIP1, SPTAN1	247	1083	12782	1.24236	1	0.530492	94.8959
GOTERM_CC_FAT	GO:0005626~insoluble fraction	18	6.25	0.449188	COPA, SORD, VAPA, ALG2, PDLIM5, SYNCRIP, ARF6, CAPN2, CTNNB1, EBNA1BP2, NME2, VCP, LRRC59, SH3KBP1, CYFIP1, ACSL3, SPTAN1, PLEC	247	839	12782	1.11023	1	0.840845	99.9702
GOTERM_CC_FAT	GO:0005624~membrane fraction	16	5.55556	0.597963	COPA, SORD, VAPA, ALG2, PDLIM5, SYNCRIP, ARF6, CTNNB1, EBNA1BP2, NME2, VCP, LRRC59, SH3KBP1, CYFIP1, ACSL3, SPTAN1	247	809	12782	1.02347	1	0.925414	99.9996
Annotation Cluster 60	Enrichment Score: 0.39380364923239236
Category	Term	Count	%	PValue	Genes	List Total	Pop Hits	Pop Total	Fold Enrichment	Bonferroni	Benjamini	FDR
GOTERM_BP_FAT	GO:0006919~activation of caspase activity	3	1.04167	0.264931	VCP, GSPT1, STAT1	252	54	13528	2.98236	1	0.846503	99.3441
GOTERM_BP_FAT	GO:0043280~positive regulation of caspase activity	3	1.04167	0.299405	VCP, GSPT1, STAT1	252	59	13528	2.72962	1	0.870291	99.7007
GOTERM_BP_FAT	GO:0010952~positive regulation of peptidase activity	3	1.04167	0.299405	VCP, GSPT1, STAT1	252	59	13528	2.72962	1	0.870291	99.7007
GOTERM_BP_FAT	GO:0051345~positive regulation of hydrolase activity	5	1.73611	0.425147	MSH6, VCP, GSPT1, MSH2, STAT1	252	179	13528	1.49951	1	0.943532	99.9882
GOTERM_BP_FAT	GO:0043281~regulation of caspase activity	3	1.04167	0.432578	VCP, GSPT1, STAT1	252	79	13528	2.03858	1	0.9466	99.9904
GOTERM_BP_FAT	GO:0052548~regulation of endopeptidase activity	3	1.04167	0.451459	VCP, GSPT1, STAT1	252	82	13528	1.964	1	0.954063	99.9945
GOTERM_BP_FAT	GO:0052547~regulation of peptidase activity	3	1.04167	0.47607	VCP, GSPT1, STAT1	252	86	13528	1.87265	1	0.961786	99.9974
GOTERM_BP_FAT	GO:0051336~regulation of hydrolase activity	6	2.08333	0.753406	MSH6, SMAP1, VCP, GSPT1, MSH2, STAT1	252	337	13528	0.955772	1	0.996536	100
Annotation Cluster 61	Enrichment Score: 0.38795170880328816
Category	Term	Count	%	PValue	Genes	List Total	Pop Hits	Pop Total	Fold Enrichment	Bonferroni	Benjamini	FDR
KEGG_PATHWAY	hsa05412:Arrhythmogenic right ventricular cardiomyopathy (ARVC)	4	1.38889	0.254318	ITGB4, ACTN1, CTNNA1, CTNNB1	118	76	5085	2.26806	1	0.8249	96.0271
GOTERM_BP_FAT	GO:0007160~cell-matrix adhesion	3	1.04167	0.494085	ITGB4, ACTN1, CTNNB1	252	89	13528	1.80952	1	0.965371	99.9985
GOTERM_BP_FAT	GO:0031589~cell-substrate adhesion	3	1.04167	0.545715	ITGB4, ACTN1, CTNNB1	252	98	13528	1.64334	1	0.976855	99.9997
Annotation Cluster 62	Enrichment Score: 0.37699656600963455
Category	Term	Count	%	PValue	Genes	List Total	Pop Hits	Pop Total	Fold Enrichment	Bonferroni	Benjamini	FDR
KEGG_PATHWAY	hsa04670:Leukocyte transendothelial migration	6	2.08333	0.134765	CDC42, ACTN1, RAP1B, CTNNA1, CTNNB1, VCL	118	118	5085	2.19118	0.999999	0.747202	79.6308
KEGG_PATHWAY	hsa05412:Arrhythmogenic right ventricular cardiomyopathy (ARVC)	4	1.38889	0.254318	ITGB4, ACTN1, CTNNA1, CTNNB1	118	76	5085	2.26806	1	0.8249	96.0271
GOTERM_BP_FAT	GO:0007155~cell adhesion	9	3.125	0.951516	RPSA, NME2, AIMP1, ITGB4, ACTN1, ARF6, CTNNA1, CTNNB1, VCL	252	700	13528	0.690204	1	0.999981	100
GOTERM_BP_FAT	GO:0022610~biological adhesion	9	3.125	0.952012	RPSA, NME2, AIMP1, ITGB4, ACTN1, ARF6, CTNNA1, CTNNB1, VCL	252	701	13528	0.689219	1	0.999981	100
Annotation Cluster 63	Enrichment Score: 0.3577271758798526
Category	Term	Count	%	PValue	Genes	List Total	Pop Hits	Pop Total	Fold Enrichment	Bonferroni	Benjamini	FDR
GOTERM_BP_FAT	GO:0051321~meiotic cell cycle	4	1.38889	0.283718	MSH6, NUMA1, SMC1A, SMC3	252	100	13528	2.1473	1	0.861419	99.5703
GOTERM_BP_FAT	GO:0051327~M phase of meiotic cell cycle	3	1.04167	0.545715	MSH6, SMC1A, SMC3	252	98	13528	1.64334	1	0.976855	99.9997
GOTERM_BP_FAT	GO:0007126~meiosis	3	1.04167	0.545715	MSH6, SMC1A, SMC3	252	98	13528	1.64334	1	0.976855	99.9997
Annotation Cluster 64	Enrichment Score: 0.35388460985341263
Category	Term	Count	%	PValue	Genes	List Total	Pop Hits	Pop Total	Fold Enrichment	Bonferroni	Benjamini	FDR
GOTERM_BP_FAT	GO:0010033~response to organic substance	17	5.90278	0.265591	HMGB2, PFKL, MSH2, ALDOC, FHL2, PRKDC, AP3S1, DEK, TRIM16, STAT1, CTNNB1, GART, ACTR3, SRRT, NME2, VCP, PPP2R2A	252	721	13528	1.26575	1	0.846	99.3537
GOTERM_BP_FAT	GO:0009719~response to endogenous stimulus	9	3.125	0.480487	HMGB2, MSH2, ALDOC, AP3S1, FHL2, PRKDC, TRIM16, STAT1, CTNNB1	252	405	13528	1.19295	1	0.962442	99.9977
GOTERM_BP_FAT	GO:0009725~response to hormone stimulus	7	2.43056	0.67991	HMGB2, AP3S1, FHL2, PRKDC, TRIM16, STAT1, CTNNB1	252	367	13528	1.02392	1	0.993017	100
Annotation Cluster 65	Enrichment Score: 0.3424289369798662
Category	Term	Count	%	PValue	Genes	List Total	Pop Hits	Pop Total	Fold Enrichment	Bonferroni	Benjamini	FDR
GOTERM_BP_FAT	GO:0043414~biopolymer methylation	3	1.04167	0.367328	PRMT1, GSPT1, NSUN2	252	69	13528	2.33402	1	0.918437	99.9434
GOTERM_BP_FAT	GO:0032259~methylation	3	1.04167	0.413357	PRMT1, GSPT1, NSUN2	252	76	13528	2.11905	1	0.938635	99.9835
GOTERM_BP_FAT	GO:0006730~one-carbon metabolic process	3	1.04167	0.618492	PRMT1, GSPT1, NSUN2	252	112	13528	1.43793	1	0.986631	100
Annotation Cluster 66	Enrichment Score: 0.3374253414108687
Category	Term	Count	%	PValue	Genes	List Total	Pop Hits	Pop Total	Fold Enrichment	Bonferroni	Benjamini	FDR
GOTERM_BP_FAT	GO:0030031~cell projection assembly	6	2.08333	0.0190076	CDC42, ITGB4, CYFIP1, ARPC4, CAPZB, VCL	252	83	13528	3.88067	1	0.180004	26.9062
KEGG_PATHWAY	hsa04810:Regulation of actin cytoskeleton	8	2.77778	0.224865	CDC42, PPP1CA, ITGB4, CYFIP1, ACTN1, ARPC4, IQGAP1, VCL	118	215	5085	1.60347	1	0.844545	93.9182
GOTERM_BP_FAT	GO:0030030~cell projection organization	9	3.125	0.376203	CDC42, MYO6, ITGB4, CYFIP1, ARF6, ARPC4, TOP2B, CAPZB, VCL	252	368	13528	1.31289	1	0.92204	99.9551
KEGG_PATHWAY	hsa05130:Pathogenic Escherichia coli infection	3	1.04167	0.379104	CDC42, ARPC4, CTNNB1	118	57	5085	2.26806	1	0.930282	99.4693
GOTERM_BP_FAT	GO:0000902~cell morphogenesis	5	1.73611	0.900443	CDC42, CYFIP1, ARPC4, TOP2B, CTNNB1	252	356	13528	0.753968	1	0.999844	100
GOTERM_BP_FAT	GO:0032989~cellular component morphogenesis	5	1.73611	0.9398	CDC42, CYFIP1, ARPC4, TOP2B, CTNNB1	252	397	13528	0.676103	1	0.999967	100
GOTERM_BP_FAT	GO:0000904~cell morphogenesis involved in differentiation	3	1.04167	0.943381	CYFIP1, TOP2B, CTNNB1	252	244	13528	0.660031	1	0.999973	100
GOTERM_BP_FAT	GO:0048858~cell projection morphogenesis	3	1.04167	0.94426	CYFIP1, ARPC4, TOP2B	252	245	13528	0.657337	1	0.999973	100
GOTERM_BP_FAT	GO:0032990~cell part morphogenesis	3	1.04167	0.953108	CYFIP1, ARPC4, TOP2B	252	256	13528	0.629092	1	0.999982	100
GOTERM_BP_FAT	GO:0030182~neuron differentiation	5	1.73611	0.964505	CDC42, MYO6, CYFIP1, TOP2B, EPHA2	252	438	13528	0.612814	1	0.999993	100
Annotation Cluster 67	Enrichment Score: 0.32301801251503764
Category	Term	Count	%	PValue	Genes	List Total	Pop Hits	Pop Total	Fold Enrichment	Bonferroni	Benjamini	FDR
GOTERM_BP_FAT	GO:0010604~positive regulation of macromolecule metabolic process	24	8.33333	0.0477671	TBL1XR1, HMGB2, MYO6, NAA15, FHL2, PRKDC, EIF5A, TRIM16, ILF3, UBE2C, PSMA7, PRPF6, CTNNB1, PSMC6, PSMD14, PSMA5, PSMB3, PSMA4, PSMA3, PSMD2, CAND1, PSMD5, PHF5A, PSMD6	252	857	13528	1.50336	1	0.33212	55.0399
GOTERM_BP_FAT	GO:0043193~positive regulation of gene-specific transcription	4	1.38889	0.219027	HMGB2, PRKDC, TRIM16, CTNNB1	252	87	13528	2.46816	1	0.798626	98.236
GOTERM_BP_FAT	GO:0032583~regulation of gene-specific transcription	5	1.73611	0.237879	TBL1XR1, HMGB2, PRKDC, TRIM16, CTNNB1	252	134	13528	2.00308	1	0.823618	98.8165
GOTERM_BP_FAT	GO:0010551~regulation of specific transcription from RNA polymerase II promoter	4	1.38889	0.25355	TBL1XR1, HMGB2, PRKDC, CTNNB1	252	94	13528	2.28436	1	0.839889	99.157
GOTERM_BP_FAT	GO:0045893~positive regulation of transcription, DNA-dependent	12	4.16667	0.27337	TBL1XR1, HMGB2, MYO6, NAA15, FHL2, PRKDC, CAND1, TRIM16, ILF3, PHF5A, PRPF6, CTNNB1	252	477	13528	1.3505	1	0.851727	99.4568
GOTERM_BP_FAT	GO:0010552~positive regulation of specific transcription from RNA polymerase II promoter	3	1.04167	0.285633	HMGB2, PRKDC, CTNNB1	252	57	13528	2.8254	1	0.862364	99.5887
GOTERM_BP_FAT	GO:0051254~positive regulation of RNA metabolic process	12	4.16667	0.285968	TBL1XR1, HMGB2, MYO6, NAA15, FHL2, PRKDC, CAND1, TRIM16, ILF3, PHF5A, PRPF6, CTNNB1	252	481	13528	1.33927	1	0.861511	99.5918
GOTERM_MF_FAT	GO:0016563~transcription activator activity	10	3.47222	0.387997	TBL1XR1, SMARCA5, FHL2, CAND1, TRIM16, PDLIM1, ILF3, APEX1, PRPF6, CTNNB1	250	410	12983	1.26663	1	0.929544	99.898
GOTERM_BP_FAT	GO:0045941~positive regulation of transcription	12	4.16667	0.477892	TBL1XR1, HMGB2, MYO6, NAA15, FHL2, PRKDC, CAND1, TRIM16, ILF3, PHF5A, PRPF6, CTNNB1	252	564	13528	1.14218	1	0.961974	99.9975
GOTERM_BP_FAT	GO:0010628~positive regulation of gene expression	12	4.16667	0.516292	TBL1XR1, HMGB2, MYO6, NAA15, FHL2, PRKDC, CAND1, TRIM16, ILF3, PHF5A, PRPF6, CTNNB1	252	581	13528	1.10876	1	0.971112	99.9993
GOTERM_BP_FAT	GO:0010557~positive regulation of macromolecule biosynthetic process	13	4.51389	0.558053	TBL1XR1, HMGB2, MYO6, NAA15, EIF5A, PRKDC, FHL2, ILF3, TRIM16, CTNNB1, PRPF6, CAND1, PHF5A	252	654	13528	1.06708	1	0.977628	99.9998
GOTERM_BP_FAT	GO:0006357~regulation of transcription from RNA polymerase II promoter	14	4.86111	0.595289	TBL1XR1, HMGB1, HMGB2, MTDH, MYO6, FHL2, PRKDC, DEK, CTNNB1, PRPF6, SMARCA5, CAND1, RUVBL1, CHD4	252	727	13528	1.03378	1	0.983541	100
GOTERM_BP_FAT	GO:0045935~positive regulation of nucleobase, nucleoside, nucleotide and nucleic acid metabolic process	12	4.16667	0.612831	TBL1XR1, HMGB2, MYO6, NAA15, FHL2, PRKDC, CAND1, TRIM16, ILF3, PHF5A, PRPF6, CTNNB1	252	624	13528	1.03236	1	0.985927	100
GOTERM_BP_FAT	GO:0031328~positive regulation of cellular biosynthetic process	13	4.51389	0.623131	TBL1XR1, HMGB2, MYO6, NAA15, EIF5A, PRKDC, FHL2, ILF3, TRIM16, CTNNB1, PRPF6, CAND1, PHF5A	252	685	13528	1.01879	1	0.987152	100
GOTERM_BP_FAT	GO:0009891~positive regulation of biosynthetic process	13	4.51389	0.643107	TBL1XR1, HMGB2, MYO6, NAA15, EIF5A, PRKDC, FHL2, ILF3, TRIM16, CTNNB1, PRPF6, CAND1, PHF5A	252	695	13528	1.00413	1	0.989278	100
GOTERM_BP_FAT	GO:0051173~positive regulation of nitrogen compound metabolic process	12	4.16667	0.654355	TBL1XR1, HMGB2, MYO6, NAA15, FHL2, PRKDC, CAND1, TRIM16, ILF3, PHF5A, PRPF6, CTNNB1	252	644	13528	1.0003	1	0.99054	100
GOTERM_BP_FAT	GO:0009725~response to hormone stimulus	7	2.43056	0.67991	HMGB2, AP3S1, FHL2, PRKDC, TRIM16, STAT1, CTNNB1	252	367	13528	1.02392	1	0.993017	100
GOTERM_BP_FAT	GO:0045944~positive regulation of transcription from RNA polymerase II promoter	7	2.43056	0.689954	TBL1XR1, HMGB2, MYO6, PRKDC, CAND1, PRPF6, CTNNB1	252	371	13528	1.01288	1	0.993607	100
GOTERM_MF_FAT	GO:0003677~DNA binding	43	14.9306	0.699184	FUS, HMGB1, HMGB2, BCLAF1, NACA, HP1BP3, HDGF, PRKDC, TRIM16, DEK, BANF1, YBX1, CTNNB1, FUBP1, PCBP2, CSDE1, H2AFY, TOP2B, WDHD1, TOP2A, APEX1, CHD4, MSH6, SSRP1, TBL1XR1, UPF1, MSH2, DDB1, G3BP1, ILF3, TRIM25, MCM2, STAT1, MCM3, MCM4, SARNP, NME2, GTF2I, SMARCA5, PHF5A, MYBBP1A, LRPPRC, PUF60	250	2331	12983	0.957991	1	0.995625	100
GOTERM_BP_FAT	GO:0051252~regulation of RNA metabolic process	29	10.0694	0.876265	HMGB1, HMGB2, MTDH, NAA15, FHL2, PRKDC, SYNCRIP, TRIM16, DEK, YBX1, CTNNB1, CSDE1, PABPC1, CHD4, TBL1XR1, MYO6, ELAVL1, ILF3, STAT1, PRPF6, SARNP, NME2, SERBP1, SMARCA5, ESRP1, CAND1, RUVBL1, PHF5A, MYBBP1A	252	1813	13528	0.858684	1	0.999659	100
GOTERM_BP_FAT	GO:0006350~transcription	32	11.1111	0.935687	BCLAF1, NACA, NAA15, HDGF, FHL2, CNOT1, YBX1, CTNNB1, FUBP1, BZW1, ANP32A, APEX1, CHD4, SSRP1, TBL1XR1, ILF3, MCM2, STAT1, MCM3, MCM4, SARNP, NME2, GTF2I, SMARCA5, FLII, CAND1, RUVBL1, PHF5A, MYBBP1A, LRPPRC, PUF60, XRN2	252	2101	13528	0.81763	1	0.99996	100
GOTERM_BP_FAT	GO:0045449~regulation of transcription	40	13.8889	0.945735	HMGB1, HMGB2, BCLAF1, MTDH, NAA15, HDGF, FHL2, PRKDC, TRIM16, DEK, PDLIM1, CNOT1, YBX1, CTNNB1, FUBP1, BZW1, ANP32A, CSDE1, CHD4, SSRP1, TBL1XR1, MYO6, ILF3, MCM2, STAT1, MCM3, MCM4, PRPF6, SARNP, NME2, GTF2I, SMARCA5, FLII, CAND1, PHF5A, RUVBL1, MYBBP1A, LRPPRC, XRN2, PUF60	252	2601	13528	0.825568	1	0.999975	100
GOTERM_BP_FAT	GO:0006355~regulation of transcription, DNA-dependent	24	8.33333	0.979289	TBL1XR1, HMGB1, HMGB2, MTDH, MYO6, NAA15, FHL2, PRKDC, TRIM16, ILF3, DEK, STAT1, YBX1, PRPF6, CTNNB1, SARNP, NME2, SMARCA5, CSDE1, CAND1, RUVBL1, PHF5A, MYBBP1A, CHD4	252	1773	13528	0.726667	1	0.999999	100
GOTERM_MF_FAT	GO:0030528~transcription regulator activity	20	6.94444	0.985965	TBL1XR1, HMGB2, BCLAF1, FHL2, TRIM25, PDLIM1, DEK, ILF3, TRIM16, STAT1, YBX1, PRPF6, CTNNB1, FUBP1, NME2, GTF2I, SMARCA5, CAND1, PHF5A, APEX1	250	1512	12983	0.686931	1	1	100
Annotation Cluster 68	Enrichment Score: 0.2879300587909546
Category	Term	Count	%	PValue	Genes	List Total	Pop Hits	Pop Total	Fold Enrichment	Bonferroni	Benjamini	FDR
GOTERM_BP_FAT	GO:0006351~transcription, DNA-dependent	7	2.43056	0.456948	FUBP1, GTF2I, SMARCA5, STAT1, APEX1, XRN2, YBX1	252	292	13528	1.28691	1	0.955292	99.9953
GOTERM_BP_FAT	GO:0032774~RNA biosynthetic process	7	2.43056	0.4719	FUBP1, GTF2I, SMARCA5, STAT1, APEX1, XRN2, YBX1	252	296	13528	1.26952	1	0.960721	99.997
GOTERM_BP_FAT	GO:0006366~transcription from RNA polymerase II promoter	5	1.73611	0.634589	FUBP1, GTF2I, STAT1, APEX1, YBX1	252	234	13528	1.14706	1	0.988459	100
Annotation Cluster 69	Enrichment Score: 0.27954827553295564
Category	Term	Count	%	PValue	Genes	List Total	Pop Hits	Pop Total	Fold Enrichment	Bonferroni	Benjamini	FDR
GOTERM_CC_FAT	GO:0005792~microsome	6	2.08333	0.479947	COPA, NME2, VCP, LRRC59, SYNCRIP, ACSL3	247	237	12782	1.3101	1	0.856908	99.9864
GOTERM_CC_FAT	GO:0042598~vesicular fraction	6	2.08333	0.505228	COPA, NME2, VCP, LRRC59, SYNCRIP, ACSL3	247	244	12782	1.27252	1	0.872084	99.9931
GOTERM_CC_FAT	GO:0005624~membrane fraction	16	5.55556	0.597963	COPA, SORD, VAPA, ALG2, PDLIM5, SYNCRIP, ARF6, CTNNB1, EBNA1BP2, NME2, VCP, LRRC59, SH3KBP1, CYFIP1, ACSL3, SPTAN1	247	809	12782	1.02347	1	0.925414	99.9996
Annotation Cluster 70	Enrichment Score: 0.2755215500854004
Category	Term	Count	%	PValue	Genes	List Total	Pop Hits	Pop Total	Fold Enrichment	Bonferroni	Benjamini	FDR
GOTERM_BP_FAT	GO:0010605~negative regulation of macromolecule metabolic process	25	8.68056	0.00497179	SRP14, HMGB1, BCLAF1, HMGB2, MTDH, XPO5, PSMA7, CTNNB1, SRRT, TIA1, PSMB3, PSMD2, PSMD5, PSMD6, TBL1XR1, MSH6, MSH2, ILF3, UBE2C, PSMD14, PSMC6, G6PD, PSMA5, PSMA4, PSMA3	252	734	13528	1.82842	0.998488	0.0660778	7.81783
GOTERM_BP_FAT	GO:0010629~negative regulation of gene expression	9	3.125	0.722791	HMGB1, SRRT, TBL1XR1, HMGB2, BCLAF1, MTDH, XPO5, ILF3, CTNNB1	252	504	13528	0.958617	1	0.99529	100
GOTERM_MF_FAT	GO:0016564~transcription repressor activity	6	2.08333	0.7289	TBL1XR1, HMGB2, BCLAF1, ILF3, APEX1, YBX1	250	316	12983	0.986051	1	0.9969	100
GOTERM_BP_FAT	GO:0045934~negative regulation of nucleobase, nucleoside, nucleotide and nucleic acid metabolic process	9	3.125	0.73873	HMGB1, MSH6, TBL1XR1, HMGB2, BCLAF1, MTDH, MSH2, ILF3, CTNNB1	252	512	13528	0.943638	1	0.995982	100
GOTERM_BP_FAT	GO:0051172~negative regulation of nitrogen compound metabolic process	9	3.125	0.752156	HMGB1, MSH6, TBL1XR1, HMGB2, BCLAF1, MTDH, MSH2, ILF3, CTNNB1	252	519	13528	0.930911	1	0.996526	100
GOTERM_BP_FAT	GO:0010558~negative regulation of macromolecule biosynthetic process	9	3.125	0.80101	HMGB1, SRP14, TBL1XR1, HMGB2, BCLAF1, MTDH, TIA1, ILF3, CTNNB1	252	547	13528	0.883259	1	0.998393	100
GOTERM_BP_FAT	GO:0031327~negative regulation of cellular biosynthetic process	9	3.125	0.822577	HMGB1, SRP14, TBL1XR1, HMGB2, BCLAF1, MTDH, TIA1, ILF3, CTNNB1	252	561	13528	0.861217	1	0.998894	100
GOTERM_BP_FAT	GO:0009890~negative regulation of biosynthetic process	9	3.125	0.839598	HMGB1, SRP14, TBL1XR1, HMGB2, BCLAF1, MTDH, TIA1, ILF3, CTNNB1	252	573	13528	0.843181	1	0.999207	100
GOTERM_BP_FAT	GO:0016481~negative regulation of transcription	7	2.43056	0.858561	HMGB1, TBL1XR1, HMGB2, BCLAF1, MTDH, ILF3, CTNNB1	252	459	13528	0.818688	1	0.99948	100
GOTERM_BP_FAT	GO:0000122~negative regulation of transcription from RNA polymerase II promoter	4	1.38889	0.874713	HMGB1, TBL1XR1, MTDH, CTNNB1	252	266	13528	0.807256	1	0.999651	100
GOTERM_BP_FAT	GO:0045892~negative regulation of transcription, DNA-dependent	5	1.73611	0.900443	HMGB1, TBL1XR1, MTDH, ILF3, CTNNB1	252	356	13528	0.753968	1	0.999844	100
GOTERM_BP_FAT	GO:0051253~negative regulation of RNA metabolic process	5	1.73611	0.907349	HMGB1, TBL1XR1, MTDH, ILF3, CTNNB1	252	362	13528	0.741472	1	0.999875	100
Annotation Cluster 71	Enrichment Score: 0.2730066646684774
Category	Term	Count	%	PValue	Genes	List Total	Pop Hits	Pop Total	Fold Enrichment	Bonferroni	Benjamini	FDR
GOTERM_BP_FAT	GO:0008584~male gonad development	3	1.04167	0.251128	HMGB2, MSH2, CSDE1	252	52	13528	3.09707	1	0.838029	99.1112
GOTERM_BP_FAT	GO:0046546~development of primary male sexual characteristics	3	1.04167	0.340402	HMGB2, MSH2, CSDE1	252	65	13528	2.47766	1	0.900468	99.8882
GOTERM_BP_FAT	GO:0046661~male sex differentiation	3	1.04167	0.39382	HMGB2, MSH2, CSDE1	252	73	13528	2.20613	1	0.930967	99.9719
GOTERM_BP_FAT	GO:0008406~gonad development	3	1.04167	0.618492	HMGB2, MSH2, CSDE1	252	112	13528	1.43793	1	0.986631	100
GOTERM_BP_FAT	GO:0048608~reproductive structure development	3	1.04167	0.682002	HMGB2, MSH2, CSDE1	252	126	13528	1.27816	1	0.9931	100
GOTERM_BP_FAT	GO:0045137~development of primary sexual characteristics	3	1.04167	0.686191	HMGB2, MSH2, CSDE1	252	127	13528	1.26809	1	0.993376	100
GOTERM_BP_FAT	GO:0007548~sex differentiation	3	1.04167	0.773776	HMGB2, MSH2, CSDE1	252	151	13528	1.06654	1	0.997464	100
GOTERM_BP_FAT	GO:0003006~reproductive developmental process	4	1.38889	0.868125	HMGB2, MSH2, CSDE1, PRKDC	252	262	13528	0.819581	1	0.999585	100
Annotation Cluster 72	Enrichment Score: 0.26081805887994425
Category	Term	Count	%	PValue	Genes	List Total	Pop Hits	Pop Total	Fold Enrichment	Bonferroni	Benjamini	FDR
GOTERM_BP_FAT	GO:0014070~response to organic cyclic substance	5	1.73611	0.187451	MSH2, ALDOC, STAT1, CTNNB1, PPP2R2A	252	121	13528	2.21829	1	0.748416	96.63
KEGG_PATHWAY	hsa05200:Pathways in cancer	6	2.08333	0.882477	CDC42, MSH6, MSH2, CTNNA1, STAT1, CTNNB1	118	328	5085	0.788291	1	0.9996	100
GOTERM_MF_FAT	GO:0043565~sequence-specific DNA binding	5	1.73611	0.997595	TBL1XR1, MSH2, MCM2, STAT1, CTNNB1	250	607	12983	0.427776	1	1	100
Annotation Cluster 73	Enrichment Score: 0.2550596790063012
Category	Term	Count	%	PValue	Genes	List Total	Pop Hits	Pop Total	Fold Enrichment	Bonferroni	Benjamini	FDR
GOTERM_BP_FAT	GO:0032869~cellular response to insulin stimulus	3	1.04167	0.360634	AP3S1, PRKDC, STAT1	252	68	13528	2.36835	1	0.914487	99.9328
GOTERM_BP_FAT	GO:0043434~response to peptide hormone stimulus	4	1.38889	0.54712	AP3S1, PRKDC, TRIM16, STAT1	252	154	13528	1.39435	1	0.976877	99.9998
GOTERM_BP_FAT	GO:0032868~response to insulin stimulus	3	1.04167	0.556681	AP3S1, PRKDC, STAT1	252	100	13528	1.61048	1	0.977609	99.9998
GOTERM_BP_FAT	GO:0009725~response to hormone stimulus	7	2.43056	0.67991	HMGB2, AP3S1, FHL2, PRKDC, TRIM16, STAT1, CTNNB1	252	367	13528	1.02392	1	0.993017	100
GOTERM_BP_FAT	GO:0032870~cellular response to hormone stimulus	3	1.04167	0.710388	AP3S1, PRKDC, STAT1	252	133	13528	1.21088	1	0.994979	100
Annotation Cluster 74	Enrichment Score: 0.24995779018508654
Category	Term	Count	%	PValue	Genes	List Total	Pop Hits	Pop Total	Fold Enrichment	Bonferroni	Benjamini	FDR
GOTERM_BP_FAT	GO:0006633~fatty acid biosynthetic process	3	1.04167	0.432578	PTGES3, LTA4H, ACSL3	252	79	13528	2.03858	1	0.9466	99.9904
GOTERM_BP_FAT	GO:0006631~fatty acid metabolic process	5	1.73611	0.500776	PTGES3, LYPLA2, LTA4H, ACSL3, HADHB	252	198	13528	1.35562	1	0.967151	99.9988
GOTERM_BP_FAT	GO:0016053~organic acid biosynthetic process	4	1.38889	0.551513	PTGES3, PYCR1, LTA4H, ACSL3	252	155	13528	1.38536	1	0.976994	99.9998
GOTERM_BP_FAT	GO:0046394~carboxylic acid biosynthetic process	4	1.38889	0.551513	PTGES3, PYCR1, LTA4H, ACSL3	252	155	13528	1.38536	1	0.976994	99.9998
GOTERM_BP_FAT	GO:0008610~lipid biosynthetic process	5	1.73611	0.853872	PTGES3, G6PD, ACLY, LTA4H, ACSL3	252	323	13528	0.830999	1	0.999423	100
Annotation Cluster 75	Enrichment Score: 0.23151821023100883
Category	Term	Count	%	PValue	Genes	List Total	Pop Hits	Pop Total	Fold Enrichment	Bonferroni	Benjamini	FDR
GOTERM_BP_FAT	GO:0042981~regulation of apoptosis	16	5.55556	0.538622	HMGB1, MSH6, BCLAF1, MSH2, PRKDC, EIF5A, ACTN1, PRDX5, STAT1, NME2, CUL4A, VCP, GSPT1, TIA1, EEF1E1, TOP2A	252	804	13528	1.06831	1	0.975748	99.9997
GOTERM_BP_FAT	GO:0043067~regulation of programmed cell death	16	5.55556	0.545459	HMGB1, MSH6, BCLAF1, MSH2, PRKDC, EIF5A, ACTN1, PRDX5, STAT1, NME2, CUL4A, VCP, GSPT1, TIA1, EEF1E1, TOP2A	252	812	13528	1.05778	1	0.977111	99.9997
GOTERM_BP_FAT	GO:0043065~positive regulation of apoptosis	9	3.125	0.54748	MSH6, BCLAF1, CUL4A, TIA1, EEF1E1, PRKDC, EIF5A, STAT1, TOP2A	252	430	13528	1.12359	1	0.976647	99.9998
GOTERM_BP_FAT	GO:0010941~regulation of cell death	16	5.55556	0.551351	HMGB1, MSH6, BCLAF1, MSH2, PRKDC, EIF5A, ACTN1, PRDX5, STAT1, NME2, CUL4A, VCP, GSPT1, TIA1, EEF1E1, TOP2A	252	815	13528	1.05389	1	0.977268	99.9998
GOTERM_BP_FAT	GO:0043068~positive regulation of programmed cell death	9	3.125	0.555435	MSH6, BCLAF1, CUL4A, TIA1, EEF1E1, PRKDC, EIF5A, STAT1, TOP2A	252	433	13528	1.1158	1	0.97762	99.9998
GOTERM_BP_FAT	GO:0010942~positive regulation of cell death	9	3.125	0.560706	MSH6, BCLAF1, CUL4A, TIA1, EEF1E1, PRKDC, EIF5A, STAT1, TOP2A	252	435	13528	1.11067	1	0.977948	99.9999
GOTERM_BP_FAT	GO:0006917~induction of apoptosis	6	2.08333	0.712104	MSH6, BCLAF1, CUL4A, TIA1, EIF5A, STAT1	252	320	13528	1.00655	1	0.995019	100
GOTERM_BP_FAT	GO:0012502~induction of programmed cell death	6	2.08333	0.714661	MSH6, BCLAF1, CUL4A, TIA1, EIF5A, STAT1	252	321	13528	1.00341	1	0.994949	100
Annotation Cluster 76	Enrichment Score: 0.21418462729434454
Category	Term	Count	%	PValue	Genes	List Total	Pop Hits	Pop Total	Fold Enrichment	Bonferroni	Benjamini	FDR
GOTERM_BP_FAT	GO:0001701~in utero embryonic development	5	1.73611	0.41266	PRMT1, TJP1, MSH2, CAPN2, YBX1	252	176	13528	1.52507	1	0.938943	99.9832
GOTERM_BP_FAT	GO:0043009~chordate embryonic development	6	2.08333	0.739354	PRMT1, TJP1, MSH2, PRKDC, CAPN2, YBX1	252	331	13528	0.973097	1	0.995952	100
GOTERM_BP_FAT	GO:0009792~embryonic development ending in birth or egg hatching	6	2.08333	0.746451	PRMT1, TJP1, MSH2, PRKDC, CAPN2, YBX1	252	334	13528	0.964357	1	0.996255	100
Annotation Cluster 77	Enrichment Score: 0.20547844875790805
Category	Term	Count	%	PValue	Genes	List Total	Pop Hits	Pop Total	Fold Enrichment	Bonferroni	Benjamini	FDR
GOTERM_MF_FAT	GO:0004722~protein serine/threonine phosphatase activity	3	1.04167	0.213431	PPM1G, PPP1CA, PPP2R2A	250	45	12983	3.46213	1	0.769774	96.5531
GOTERM_BP_FAT	GO:0006470~protein amino acid dephosphorylation	3	1.04167	0.710388	PPM1G, PPP1CA, PPP2R2A	252	133	13528	1.21088	1	0.994979	100
GOTERM_BP_FAT	GO:0016311~dephosphorylation	3	1.04167	0.783083	PPM1G, PPP1CA, PPP2R2A	252	154	13528	1.04576	1	0.997776	100
GOTERM_MF_FAT	GO:0004721~phosphoprotein phosphatase activity	3	1.04167	0.828737	PPM1G, PPP1CA, PPP2R2A	250	165	12983	0.944218	1	0.999017	100
GOTERM_MF_FAT	GO:0016791~phosphatase activity	3	1.04167	0.95418	PPM1G, PPP1CA, PPP2R2A	250	249	12983	0.625687	1	0.999987	100
Annotation Cluster 78	Enrichment Score: 0.19295681880974663
Category	Term	Count	%	PValue	Genes	List Total	Pop Hits	Pop Total	Fold Enrichment	Bonferroni	Benjamini	FDR
GOTERM_MF_FAT	GO:0005083~small GTPase regulator activity	7	2.43056	0.429224	DIS3, SMAP1, IPO7, RANBP1, RANGAP1, RCC1, IQGAP1	250	274	12983	1.32673	1	0.947809	99.9616
GOTERM_MF_FAT	GO:0060589~nucleoside-triphosphatase regulator activity	9	3.125	0.539687	DIS3, SMAP1, IPO7, IPO5, RANBP1, RANGAP1, RCC1, AHSA1, IQGAP1	250	413	12983	1.13169	1	0.975518	99.9981
GOTERM_MF_FAT	GO:0030695~GTPase regulator activity	8	2.77778	0.660703	DIS3, SMAP1, IPO7, IPO5, RANBP1, RANGAP1, RCC1, IQGAP1	250	404	12983	1.02836	1	0.992854	100
GOTERM_MF_FAT	GO:0005096~GTPase activator activity	4	1.38889	0.797582	SMAP1, RANBP1, RANGAP1, IQGAP1	250	220	12983	0.944218	1	0.998321	100
GOTERM_MF_FAT	GO:0008047~enzyme activator activity	5	1.73611	0.888399	SMAP1, RANBP1, RANGAP1, AHSA1, IQGAP1	250	335	12983	0.775104	1	0.99975	100
Annotation Cluster 79	Enrichment Score: 0.16462860932962523
Category	Term	Count	%	PValue	Genes	List Total	Pop Hits	Pop Total	Fold Enrichment	Bonferroni	Benjamini	FDR
GOTERM_MF_FAT	GO:0016879~ligase activity, forming carbon-nitrogen bonds	6	2.08333	0.456314	ADSS, UBE2M, UBR4, ARPC4, UBE2C, GART	250	231	12983	1.34888	1	0.956268	99.9806
GOTERM_MF_FAT	GO:0016881~acid-amino acid ligase activity	4	1.38889	0.744952	UBE2M, UBR4, ARPC4, UBE2C	250	201	12983	1.03347	1	0.996972	100
GOTERM_MF_FAT	GO:0004842~ubiquitin-protein ligase activity	3	1.04167	0.776872	UBE2M, UBR4, UBE2C	250	147	12983	1.05984	1	0.997796	100
GOTERM_MF_FAT	GO:0019787~small conjugating protein ligase activity	3	1.04167	0.831274	UBE2M, UBR4, UBE2C	250	166	12983	0.93853	1	0.998945	100
Annotation Cluster 80	Enrichment Score: 0.13879091401906604
Category	Term	Count	%	PValue	Genes	List Total	Pop Hits	Pop Total	Fold Enrichment	Bonferroni	Benjamini	FDR
GOTERM_BP_FAT	GO:0001525~angiogenesis	4	1.38889	0.520247	GPI, AIMP1, NAA15, CTNNB1	252	148	13528	1.45088	1	0.971873	99.9994
GOTERM_BP_FAT	GO:0048514~blood vessel morphogenesis	4	1.38889	0.754187	GPI, AIMP1, NAA15, CTNNB1	252	211	13528	1.01768	1	0.996519	100
GOTERM_BP_FAT	GO:0001568~blood vessel development	4	1.38889	0.836635	GPI, AIMP1, NAA15, CTNNB1	252	245	13528	0.87645	1	0.999166	100
GOTERM_BP_FAT	GO:0001944~vasculature development	4	1.38889	0.848422	GPI, AIMP1, NAA15, CTNNB1	252	251	13528	0.855499	1	0.99935	100
Annotation Cluster 81	Enrichment Score: 0.1255996791052338
Category	Term	Count	%	PValue	Genes	List Total	Pop Hits	Pop Total	Fold Enrichment	Bonferroni	Benjamini	FDR
GOTERM_BP_FAT	GO:0006928~cell motion	11	3.81944	0.378775	ACTR3, TLN1, SORD, AIMP1, MSH2, PRKDC, ARF6, TOP2B, CAPZB, VCL, DSTN	252	475	13528	1.24317	1	0.922947	99.958
GOTERM_BP_FAT	GO:0048870~cell motility	4	1.38889	0.927148	SORD, AIMP1, PRKDC, TOP2B	252	307	13528	0.699447	1	0.999942	100
GOTERM_BP_FAT	GO:0051674~localization of cell	4	1.38889	0.927148	SORD, AIMP1, PRKDC, TOP2B	252	307	13528	0.699447	1	0.999942	100
GOTERM_BP_FAT	GO:0016477~cell migration	3	1.04167	0.965878	AIMP1, PRKDC, TOP2B	252	276	13528	0.583506	1	0.999993	100
Annotation Cluster 82	Enrichment Score: 0.07018824219684243
Category	Term	Count	%	PValue	Genes	List Total	Pop Hits	Pop Total	Fold Enrichment	Bonferroni	Benjamini	FDR
GOTERM_CC_FAT	GO:0042175~nuclear envelope-endoplasmic reticulum network	6	2.08333	0.641952	XPO1, VAPA, EIF5A, SSR4, SEC61A1, LRPPRC	247	284	12782	1.09329	1	0.945061	99.9999
GOTERM_CC_FAT	GO:0005789~endoplasmic reticulum membrane	3	1.04167	0.96756	VAPA, SSR4, SEC61A1	247	269	12782	0.577126	1	0.999806	100
GOTERM_CC_FAT	GO:0044432~endoplasmic reticulum part	3	1.04167	0.991413	VAPA, SSR4, SEC61A1	247	347	12782	0.447398	1	0.999992	100
Annotation Cluster 83	Enrichment Score: 0.0674534277633324
Category	Term	Count	%	PValue	Genes	List Total	Pop Hits	Pop Total	Fold Enrichment	Bonferroni	Benjamini	FDR
GOTERM_BP_FAT	GO:0009967~positive regulation of signal transduction	5	1.73611	0.801033	VAPA, EEF1E1, TRIM16, EEF1D, CTNNB1	252	295	13528	0.909874	1	0.998362	100
GOTERM_BP_FAT	GO:0010740~positive regulation of protein kinase cascade	3	1.04167	0.819637	VAPA, EEF1D, CTNNB1	252	167	13528	0.964357	1	0.998844	100
GOTERM_BP_FAT	GO:0010647~positive regulation of cell communication	5	1.73611	0.863511	VAPA, EEF1E1, TRIM16, EEF1D, CTNNB1	252	329	13528	0.815844	1	0.999537	100
GOTERM_BP_FAT	GO:0010627~regulation of protein kinase cascade	3	1.04167	0.947646	VAPA, EEF1D, CTNNB1	252	249	13528	0.646778	1	0.999977	100
Annotation Cluster 84	Enrichment Score: 0.029963182465091477
Category	Term	Count	%	PValue	Genes	List Total	Pop Hits	Pop Total	Fold Enrichment	Bonferroni	Benjamini	FDR
GOTERM_BP_FAT	GO:0003006~reproductive developmental process	4	1.38889	0.868125	HMGB2, MSH2, CSDE1, PRKDC	252	262	13528	0.819581	1	0.999585	100
GOTERM_BP_FAT	GO:0048232~male gamete generation	4	1.38889	0.928131	HMGB2, MSH2, RUVBL1, XRN2	252	308	13528	0.697176	1	0.999943	100
GOTERM_BP_FAT	GO:0007283~spermatogenesis	4	1.38889	0.928131	HMGB2, MSH2, RUVBL1, XRN2	252	308	13528	0.697176	1	0.999943	100
GOTERM_BP_FAT	GO:0007276~gamete generation	5	1.73611	0.938266	HMGB2, MSH2, PRKDC, RUVBL1, XRN2	252	395	13528	0.679526	1	0.999965	100
GOTERM_BP_FAT	GO:0032504~multicellular organism reproduction	6	2.08333	0.950727	HMGB2, NME2, MSH2, PRKDC, RUVBL1, XRN2	252	487	13528	0.661387	1	0.99998	100
GOTERM_BP_FAT	GO:0048609~reproductive process in a multicellular organism	6	2.08333	0.950727	HMGB2, NME2, MSH2, PRKDC, RUVBL1, XRN2	252	487	13528	0.661387	1	0.99998	100
GOTERM_BP_FAT	GO:0019953~sexual reproduction	5	1.73611	0.97279	HMGB2, MSH2, PRKDC, RUVBL1, XRN2	252	458	13528	0.586054	1	0.999996	100
Annotation Cluster 85	Enrichment Score: 0.015906151440735438
Category	Term	Count	%	PValue	Genes	List Total	Pop Hits	Pop Total	Fold Enrichment	Bonferroni	Benjamini	FDR
GOTERM_BP_FAT	GO:0043066~negative regulation of apoptosis	4	1.38889	0.962132	HMGB1, NME2, MSH2, PRDX5	252	354	13528	0.606582	1	0.999991	100
GOTERM_BP_FAT	GO:0043069~negative regulation of programmed cell death	4	1.38889	0.964741	HMGB1, NME2, MSH2, PRDX5	252	359	13528	0.598134	1	0.999993	100
GOTERM_BP_FAT	GO:0060548~negative regulation of cell death	4	1.38889	0.965242	HMGB1, NME2, MSH2, PRDX5	252	360	13528	0.596473	1	0.999993	100
Annotation Cluster 86	Enrichment Score: 0.013963297374704847
Category	Term	Count	%	PValue	Genes	List Total	Pop Hits	Pop Total	Fold Enrichment	Bonferroni	Benjamini	FDR
GOTERM_BP_FAT	GO:0031175~neuron projection development	3	1.04167	0.953108	MYO6, CYFIP1, TOP2B	252	256	13528	0.629092	1	0.999982	100
GOTERM_BP_FAT	GO:0030182~neuron differentiation	5	1.73611	0.964505	CDC42, MYO6, CYFIP1, TOP2B, EPHA2	252	438	13528	0.612814	1	0.999993	100
GOTERM_BP_FAT	GO:0048666~neuron development	3	1.04167	0.987788	MYO6, CYFIP1, TOP2B	252	339	13528	0.475067	1	1	100
Annotation Cluster 87	Enrichment Score: 0.0038043507502865093
Category	Term	Count	%	PValue	Genes	List Total	Pop Hits	Pop Total	Fold Enrichment	Bonferroni	Benjamini	FDR
GOTERM_BP_FAT	GO:0006954~inflammatory response	3	1.04167	0.984609	AIMP1, PRDX5, LTA4H	252	325	13528	0.495531	1	0.999999	100
GOTERM_BP_FAT	GO:0009611~response to wounding	5	1.73611	0.989943	AIMP1, PABPC4, PRDX5, LTA4H, AP3B1	252	530	13528	0.506439	1	1	100
GOTERM_BP_FAT	GO:0006952~defense response	4	1.38889	0.99934	AIMP1, PRDX5, LTA4H, COTL1	252	615	13528	0.349155	1	1	100
Annotation Cluster 88	Enrichment Score: 0.001518267900565659
Category	Term	Count	%	PValue	Genes	List Total	Pop Hits	Pop Total	Fold Enrichment	Bonferroni	Benjamini	FDR
GOTERM_BP_FAT	GO:0006796~phosphate metabolic process	10	3.47222	0.994863	PPM1G, PPP1CA, NME2, CSNK2A1, MSH2, PRKDC, SPTBN1, STAT1, EPHA2, PPP2R2A	252	973	13528	0.551722	1	1	100
GOTERM_BP_FAT	GO:0006793~phosphorus metabolic process	10	3.47222	0.994863	PPM1G, PPP1CA, NME2, CSNK2A1, MSH2, PRKDC, SPTBN1, STAT1, EPHA2, PPP2R2A	252	973	13528	0.551722	1	1	100
GOTERM_BP_FAT	GO:0016310~phosphorylation	7	2.43056	0.997643	NME2, CSNK2A1, MSH2, PRKDC, SPTBN1, STAT1, EPHA2	252	800	13528	0.469722	1	1	100
GOTERM_BP_FAT	GO:0006468~protein amino acid phosphorylation	5	1.73611	0.998677	CSNK2A1, PRKDC, SPTBN1, STAT1, EPHA2	252	667	13528	0.402418	1	1	100
Annotation Cluster 89	Enrichment Score: 3.885968436374012E-4
Category	Term	Count	%	PValue	Genes	List Total	Pop Hits	Pop Total	Fold Enrichment	Bonferroni	Benjamini	FDR
GOTERM_CC_FAT	GO:0005615~extracellular space	6	2.08333	0.997456	GPI, COPA, HDLBP, SORD, AIMP1, HDGF	247	685	12782	0.453276	1	0.999999	100
GOTERM_CC_FAT	GO:0044421~extracellular region part	7	2.43056	0.999863	GPI, COPA, HDLBP, SORD, AIMP1, HDGF, SMC3	247	960	12782	0.377336	1	1	100
GOTERM_CC_FAT	GO:0005576~extracellular region	10	3.47222	1	GPI, COPA, TLN1, HDLBP, SORD, AIMP1, HDGF, ACTN1, SMC3, VCL	247	2010	12782	0.257458	1	1	100
Annotation Cluster 90	Enrichment Score: 1.815995097156643E-5
Category	Term	Count	%	PValue	Genes	List Total	Pop Hits	Pop Total	Fold Enrichment	Bonferroni	Benjamini	FDR
GOTERM_MF_FAT	GO:0008270~zinc ion binding	26	9.02778	0.999799	FUS, SORD, ZC3HAV1, PDLIM7, PDLIM5, FHL2, TRIM16, PDLIM1, IARS, SMAP1, LUC7L2, ZNF598, KPNB1, CHD4, SEC23A, UPF1, UBR4, TRIM25, MCM2, SF3A3, PSMD14, LASP1, EIF2S2, LTA4H, MATR3, XRN2	250	2311	12983	0.584263	1	1	100
GOTERM_MF_FAT	GO:0046914~transition metal ion binding	29	10.0694	0.999993	FUS, SORD, ZC3HAV1, PDLIM7, PDLIM5, FHL2, TRIM16, PDLIM1, IARS, SMAP1, LUC7L2, ZNF598, KPNB1, CHD4, SEC23A, UPF1, UBR4, TRIM25, MCM2, GART, SF3A3, PPM1G, PSMD14, PPP1CA, LASP1, EIF2S2, LTA4H, MATR3, XRN2	250	2785	12983	0.540764	1	1	100
GOTERM_MF_FAT	GO:0046872~metal ion binding	47	16.3194	0.999999	FUS, ADSS, COPA, SORD, PDLIM7, ZC3HAV1, PDLIM5, FHL2, PDLIM1, TRIM16, IARS, SMAP1, LUC7L2, ZNF598, APEX1, KPNB1, ACSL3, CHD4, SEC23A, MSH6, UPF1, PFKL, MSH2, UBR4, ACTN1, TKT, ACLY, TRIM25, MCM2, PFKM, CAPN2, STAT1, SF3A3, GART, PPM1G, NME2, PSMD14, PPP1CA, LASP1, EIF2S2, FARSB, LTA4H, SSR4, MATR3, XRN2, DUT, SPTAN1	250	4140	12983	0.589566	1	1	100
GOTERM_MF_FAT	GO:0043169~cation binding	47	16.3194	1	FUS, ADSS, COPA, SORD, PDLIM7, ZC3HAV1, PDLIM5, FHL2, PDLIM1, TRIM16, IARS, SMAP1, LUC7L2, ZNF598, APEX1, KPNB1, ACSL3, CHD4, SEC23A, MSH6, UPF1, PFKL, MSH2, UBR4, ACTN1, TKT, ACLY, TRIM25, MCM2, PFKM, CAPN2, STAT1, SF3A3, GART, PPM1G, NME2, PSMD14, PPP1CA, LASP1, EIF2S2, FARSB, LTA4H, SSR4, MATR3, XRN2, DUT, SPTAN1	250	4179	12983	0.584064	1	1	100
GOTERM_MF_FAT	GO:0043167~ion binding	47	16.3194	1	FUS, ADSS, COPA, SORD, PDLIM7, ZC3HAV1, PDLIM5, FHL2, PDLIM1, TRIM16, IARS, SMAP1, LUC7L2, ZNF598, APEX1, KPNB1, ACSL3, CHD4, SEC23A, MSH6, UPF1, PFKL, MSH2, UBR4, ACTN1, TKT, ACLY, TRIM25, MCM2, PFKM, CAPN2, STAT1, SF3A3, GART, PPM1G, NME2, PSMD14, PPP1CA, LASP1, EIF2S2, FARSB, LTA4H, SSR4, MATR3, XRN2, DUT, SPTAN1	250	4241	12983	0.575526	1	1	100
