# Supplementary material for: FXR1 regulates transcription and is required for growth of human cancer cells with TP53/FXR2 homozygous deletion
Source: eLife journal article supplement (doi:10.7554/elife.26129), 2017-08-02
Supplement: supp [file elife-26129-supp-v2.zip › elife_poa_e26129_Supplementary_File_3.xlsx]

## Sheet: Overall peak overlap
Table S3: FXR1, FXR2, histone marks and STATs ChIP-seq peaks, distribution, and overlap analysis
Overall peak overlap
FXR1 vs others
A	B	A overlap B	B overlap A
H358_FXR1	H358_STAT1	215 in 882 (24.38%)	246 in 15639 (1.57%)
H358_FXR1	H358_STAT3	227 in 882 (25.74%)	200 in 28739 (0.70%)
H358_FXR1	H358_H3K4me3	326 in 882 (36.96%)	272 in 40564 (0.67%)
AGS_FXR1	AGS_FXR2	1586 in 3528 (44.95%)	1087 in 31899 (3.41%)
AGS_FXR1	AGS_STAT1	653 in 3528 (18.51%)	438 in 3874 (11.31%)
AGS_FXR1	AGS_STAT3	804 in 3528 (22.79%)	566 in 11471 (4.93%)
AGS_FXR1	AGS_H3K4me3	1561 in 3528 (44.25%)	1096 in 28678 (3.82%)
All vs All
		AGS_FXR1	AGS_FXR2	AGS_H3K4me3	AGS_STAT1	AGS_STAT3	H358_FXR1	H358_H3K4me3	H358_STAT1	H358_STAT3
AGS_FXR1_sigma96448	3528	3528 in 3528 (100.00%)	1087 in 31899 (3.41%)	1096 in 28678 (3.82%)	438 in 3874 (11.31%)	566 in 11471 (4.93%)	11 in 882 (1.25%)	1139 in 40564 (2.81%)	632 in 15639 (4.04%)	545 in 28739 (1.90%)
AGS_FXR2_PA5	31899	1586 in 3528 (44.95%)	31899 in 31899 (100.00%)	18842 in 28678 (65.70%)	3107 in 3874 (80.20%)	10099 in 11471 (88.04%)	212 in 882 (24.04%)	15849 in 40564 (39.07%)	9217 in 15639 (58.94%)	11380 in 28739 (39.60%)
AGS_H3K4me3_CST	28678	1561 in 3528 (44.25%)	19620 in 31899 (61.51%)	28678 in 28678 (100.00%)	3249 in 3874 (83.87%)	8689 in 11471 (75.75%)	252 in 882 (28.57%)	20740 in 40564 (51.13%)	9586 in 15639 (61.30%)	10865 in 28739 (37.81%)
AGS_STAT1_CST	3874	653 in 3528 (18.51%)	3158 in 31899 (9.90%)	3185 in 28678 (11.11%)	3874 in 3874 (100.00%)	1976 in 11471 (17.23%)	30 in 882 (3.40%)	3039 in 40564 (7.49%)	2180 in 15639 (13.94%)	1855 in 28739 (6.45%)
AGS_STAT3_CST	11471	804 in 3528 (22.79%)	10462 in 31899 (32.80%)	8652 in 28678 (30.17%)	1986 in 3874 (51.26%)	11471 in 11471 (100.00%)	116 in 882 (13.15%)	6910 in 40564 (17.03%)	5088 in 15639 (32.53%)	6247 in 28739 (21.74%)
H358_FXR1	882	9 in 3528 (0.26%)	182 in 31899 (0.57%)	203 in 28678 (0.71%)	26 in 3874 (0.67%)	102 in 11471 (0.89%)	882 in 882 (100.00%)	272 in 40564 (0.67%)	246 in 15639 (1.57%)	200 in 28739 (0.70%)
H358_H3K4me3_CST	40564	1632 in 3528 (46.26%)	16835 in 31899 (52.78%)	21144 in 28678 (73.73%)	3130 in 3874 (80.79%)	7115 in 11471 (62.03%)	326 in 882 (36.96%)	40564 in 40564 (100.00%)	13265 in 15639 (84.82%)	19217 in 28739 (66.87%)
H358_STAT1_CST	15639	623 in 3528 (17.66%)	7036 in 31899 (22.06%)	6876 in 28678 (23.98%)	1604 in 3874 (41.40%)	3705 in 11471 (32.30%)	215 in 882 (24.38%)	9924 in 40564 (24.46%)	15639 in 15639 (100.00%)	9934 in 28739 (34.57%)
H358_STAT3_CST	28739	728 in 3528 (20.63%)	11087 in 31899 (34.76%)	10094 in 28678 (35.20%)	1775 in 3874 (45.82%)	5878 in 11471 (51.24%)	227 in 882 (25.74%)	17759 in 40564 (43.78%)	11945 in 15639 (76.38%)	28739 in 28739 (100.00%)

## Sheet: TSS Peak Overlap
FXR1 vs others
A	B	A overlap B	B overlap A
H358_FXR1	H358_STAT1	130 in 198 (65.66%)	150 in 6726 (2.23%)
H358_FXR1	H358_STAT3	128 in 198 (64.65%)	99 in 6130 (1.62%)
H358_FXR1	H358_H3K4me3	186 in 198 (93.94%)	147 in 13282 (1.11%)
AGS_FXR1	AGS_FXR2	1012 in 1243 (81.42%)	758 in 9535 (7.95%)
AGS_FXR1	AGS_STAT1	419 in 1243 (33.71%)	305 in 2267 (13.45%)
AGS_FXR1	AGS_STAT3	531 in 1243 (42.72%)	393 in 4094 (9.60%)
AGS_FXR1	AGS_H3K4me3	1057 in 1243 (85.04%)	855 in 11240 (7.61%)
All vs All
	AGS_FXR1	AGS_FXR2	AGS_H3K4me3	AGS_STAT1	AGS_STAT3	H358_FXR1	H358_H3K4me3	H358_STAT1	H358_STAT3
AGS_FXR1_sigma96448	1243 in 1243 (100.00%)	758 in 9535 (7.95%)	855 in 11240 (7.61%)	305 in 2267 (13.45%)	393 in 4094 (9.60%)	6 in 198 (3.03%)	859 in 13282 (6.47%)	465 in 6726 (6.91%)	357 in 6130 (5.82%)
AGS_FXR2_PA5	1012 in 1243 (81.42%)	9535 in 9535 (100.00%)	8930 in 11240 (79.45%)	2120 in 2267 (93.52%)	3886 in 4094 (94.92%)	141 in 198 (71.21%)	8641 in 13282 (65.06%)	5473 in 6726 (81.37%)	4491 in 6130 (73.26%)
AGS_H3K4me3_CST	1057 in 1243 (85.04%)	9079 in 9535 (95.22%)	11240 in 11240 (100.00%)	2219 in 2267 (97.88%)	3952 in 4094 (96.53%)	160 in 198 (80.81%)	10485 in 13282 (78.94%)	5928 in 6726 (88.14%)	4885 in 6130 (79.69%)
AGS_STAT1_CST	419 in 1243 (33.71%)	2166 in 9535 (22.72%)	2259 in 11240 (20.10%)	2267 in 2267 (100.00%)	1301 in 4094 (31.78%)	24 in 198 (12.12%)	2230 in 13282 (16.79%)	1630 in 6726 (24.23%)	1269 in 6130 (20.70%)
AGS_STAT3_CST	531 in 1243 (42.72%)	4005 in 9535 (42.00%)	4044 in 11240 (35.98%)	1304 in 2267 (57.52%)	4094 in 4094 (100.00%)	82 in 198 (41.41%)	3845 in 13282 (28.95%)	3074 in 6726 (45.70%)	2688 in 6130 (43.85%)
H358_FXR1	7 in 1243 (0.56%)	116 in 9535 (1.22%)	129 in 11240 (1.15%)	17 in 2267 (0.75%)	67 in 4094 (1.64%)	198 in 198 (100.00%)	147 in 13282 (1.11%)	150 in 6726 (2.23%)	99 in 6130 (1.62%)
H358_H3K4me3_CST	1080 in 1243 (86.89%)	8873 in 9535 (93.06%)	10600 in 11240 (94.31%)	2213 in 2267 (97.62%)	3823 in 4094 (93.38%)	186 in 198 (93.94%)	13282 in 13282 (100.00%)	6620 in 6726 (98.42%)	5750 in 6130 (93.80%)
H358_STAT1_CST	450 in 1243 (36.20%)	4032 in 9535 (42.29%)	4292 in 11240 (38.19%)	1193 in 2267 (52.62%)	2146 in 4094 (52.42%)	130 in 198 (65.66%)	4761 in 13282 (35.85%)	6726 in 6726 (100.00%)	3379 in 6130 (55.12%)
H358_STAT3_CST	485 in 1243 (39.02%)	4494 in 9535 (47.13%)	4808 in 11240 (42.78%)	1217 in 2267 (53.68%)	2592 in 4094 (63.31%)	128 in 198 (64.65%)	5583 in 13282 (42.03%)	4797 in 6726 (71.32%)	6130 in 6130 (100.00%)

## Sheet: Overlap p value
Overlap p value
27345 unique gene name
Genes have peak in TSS upstream 5kb to TTS downstream 5kb
Cell line	A	B	A unique	Common	B unique	Hypergeometric p value	C	A_u+C	B_u+C
AGS	FXR1	FXR2	328	2935	12411	5.30E-438	2935	3263	15346
AGS	FXR1	STAT1	1887	1376	3043	2.42E-322	1376	3263	4419
AGS	FXR1	STAT3	1315	1948	6093	4.67E-325	1948	3263	8041
AGS	FXR1	H3K4me3	214	3049	13910	1.77E-421	3049	3263	16959
H358	FXR1	STAT1	174	319	8435	6.12e-51	319	493	8754
H358	FXR1	STAT3	120	373	11078	2.26e-53	373	493	11451
H358	FXR1	H3K4me3	40	453	18432	3.21862e-35	453	493	18885
Genes have peak in TSS upstream 5kb to downstream 1kb
Cell line	A	B	A unique	Common	B unique	Hypergeometric p value	C	A_u+C	B_u+C
AGS	FXR1	FXR2	147	1045	11353	7.19823e-215	1045	1192	12398
AGS	FXR1	STAT1	739	453	2866	1.76125e-122	453	1192	3319
AGS	FXR1	STAT3	568	624	5104	4.02335e-151	624	1192	5728
AGS	FXR1	H3K4me3	95	1097	13360	4.71072e-200	1097	1192	14457
H358	FXR1	STAT1	65	145	6492	7.51532e-43	145	210	6637
H358	FXR1	STAT3	63	147	7629	6.87414e-36	147	210	7776
H358	FXR1	H3K4me3	10	200	16465	2.14603e-31	200	210	16665
Cell line	A	B	A unique	Common	B unique	Hypergeometric p value	C	A_u+C	B_u+C
H358	Genes have peak in TSS upstream 5kb to TTS downstream 5kb	FXR1 KD DGE at D3 or D5	410	83	2651	1.63462e-06	83	493	2734
H358	Genes have peak in TSS to TSS up 5kb dn 1kb	FXR1 KD DGE at D3 or D5	165	45	2689	6.89875e-07	45	210	2734

## Sheet: Summits_genomic_distribution
		Summits genomic distribution
TSS is defined as Upstream 5kb downstream 1kb
Genomic Group	Genomic Group	Distance relative to TSS/TTS	H358_FXR1_summits	H358_H3K4me3_CST_summits	H358_STAT1_CST_summits	H358_STAT3_CST_summits	AGS_FXR1_sigma96448_summits	AGS_FXR2_PA5_summits	AGS_H3K4me3_CST_summits	AGS_STAT1_CST_summits	AGS_STAT3_CST_summits
5_Distal(TSS up 100kbp)	5 Distal	TSS up 100kbp	0.2188	0.2199	0.1883	0.2427	0.1072	0.2208	0.2073	0.1418	0.2099
5_Proximal(TSS up 10kbp)	5 Proximal	TSS up 10kbp	0.0351	0.0419	0.0345	0.039	0.0465	0.0389	0.0431	0.0369	0.0436
5_TSS(TSS up 5kbp)	5 TSS	TSS up 5kbp to down 1kbp	0.2245	0.3275	0.4301	0.2133	0.3523	0.2989	0.3921	0.5852	0.357
Intragenic(TSS to TTS)	Intragenic	TSS dn 1kbp to TTS 1kbp	0.1361	0.1446	0.1274	0.1765	0.1024	0.1636	0.1367	0.086	0.1416
3_TTS(TTS up and down 5kbp)	3 TTS	TTS up 1kbp to down 5kbp	0.0317	0.0367	0.0386	0.0385	0.2582	0.0355	0.0382	0.0571	0.041
3_Proximal(TTS down 5kbp)	3 Proximal	TTS down 10kbp	0.0125	0.0238	0.018	0.0243	0.0411	0.0205	0.0249	0.0155	0.0212
3_Distal(TTS down 100kbp)	3 Distal	TTS down 100kbp	0.1485	0.1285	0.1072	0.1585	0.053	0.1327	0.1138	0.0643	0.1256
Intergenic	Intergenic	Intergenic	0.1927	0.0771	0.056	0.1072	0.0391	0.0892	0.0439	0.0132	0.0602
												AGS_STAT3_CST_summits

## Sheet: FXR1_summits_genomic-H358
FXR1 summits genomic distribution in H358 cells
Peak info					TSS Upstream 5kbp to Downstream 1kbp
Peak Chrom	Peak Summit Start	Peak Summit End	Peak ID	Peak Score	Peak Summit Genomic Group	Distance to Peak Summit from TSS	Peak Summit Gene TSS	Peak Summit Gene TTS	Peak Summit Gene Strand	Peak Summit Gene Symbol
chr1	5364849	5364850	MACS_peak_1	66.93	Intergenic	-259281	5624131	5624203	+	MIR4417
chr1	6761930	6761931	MACS_peak_2	62.37	5_Distal	-22874	6784805	6790072	+	LINC01672
chr1	7802546	7802547	MACS_peak_3	55.2	5_Distal	-28782	7831329	7841492	+	VAMP3
chr1	8304395	8304396	MACS_peak_4	54.56	3_Distal	35664	8268732	8275268	+	LINC01714
chr1	10739903	10739904	MACS_peak_5	378.91	Intragenic	116829	10856733	10696666	-	CASZ1
chr1	10856742	10856743	MACS_peak_6	442.96	5_TSS	-10	10856733	10696666	-	CASZ1
chr1	17565799	17565800	MACS_peak_7	70.25	5_Proximal	-9793	17575593	17610727	+	PADI3
chr1	17566019	17566020	MACS_peak_8	819.79	5_Proximal	-9573	17575593	17610727	+	PADI3
chr1	19960362	19960363	MACS_peak_9	52.32	5_Proximal	-9360	19969723	19984949	+	NBL1_dup1
chr1	26947463	26947464	MACS_peak_10	119.77	3_Distal	66431	26881033	26881084	+	MIR1976
chr1	27013402	27013403	MACS_peak_11	69.09	3_TTS	7219	27020622	27018401	-	LOC101928728
chr1	27013585	27013586	MACS_peak_12	93.34	3_TTS	7036	27020622	27018401	-	LOC101928728
chr1	27019014	27019015	MACS_peak_13	441.32	3_TTS	1607	27020622	27018401	-	LOC101928728
chr1	27019733	27019734	MACS_peak_14	262.51	5_TSS	888	27020622	27018401	-	LOC101928728
chr1	27022164	27022165	MACS_peak_15	383.31	5_TSS	-1543	27020622	27018401	-	LOC101928728
chr1	27668458	27668459	MACS_peak_16	252.3	5_TSS	-24	27668483	27680423	+	SYTL1_dup1
chr1	27676011	27676012	MACS_peak_17	228.69	Intragenic	7529	27668483	27680423	+	SYTL1_dup1
chr1	28122680	28122681	MACS_peak_18	54.49	Intragenic	22987	28099694	28150963	+	STX12
chr1	28879501	28879502	MACS_peak_19	286.54	5_TSS	-27	28879529	28905057	+	TRNAU1AP_dup1
chr1	30286631	30286632	MACS_peak_20	60.95	Intergenic	223827	30510459	30486799	-	LINC01648
chr1	33264881	33264882	MACS_peak_21	55.89	5_Distal	-18161	33283043	33324480	+	S100PBP
chr1	33921531	33921532	MACS_peak_22	71.98	5_Distal	-16700	33938232	33961995	+	ZSCAN20
chr1	38114951	38114952	MACS_peak_23	55.2	5_Distal	-14357	38100595	38076951	-	RSPO1_dup1
chr1	43425129	43425130	MACS_peak_24	94.15	5_TSS	-283	43424847	43391046	-	SLC2A1
chr1	46859923	46859924	MACS_peak_25	146	5_TSS	-15	46859939	46879520	+	FAAH
chr1	46867985	46867986	MACS_peak_26	202.81	Intragenic	8047	46859939	46879520	+	FAAH
chr1	46868131	46868132	MACS_peak_27	66.6	Intragenic	8193	46859939	46879520	+	FAAH
chr1	51985142	51985143	MACS_peak_28	413.53	5_TSS	-148	51984995	51819935	-	EPS15_dup1
chr1	56127960	56127961	MACS_peak_29	63.39	Intergenic	436647	55691314	55691396	+	MIR4422
chr1	58380419	58380420	MACS_peak_30	59.61	3_Distal	54205	58326215	58328786	+	DAB1-AS1_dup1
chr1	70476969	70476970	MACS_peak_31	54.58	3_Distal	91965	70385005	70386000	+	PIN1P1
chr1	74741815	74741816	MACS_peak_32	52.38	3_Distal	77920	74663896	74674386	+	FPGT_dup1
chr1	75271846	75271847	MACS_peak_33	55.54	5_Distal	-72755	75199092	75171172	-	CRYZ_dup1
chr1	77804211	77804212	MACS_peak_34	59	Intragenic	55925	77748287	78025654	+	AK5_dup1
chr1	79515723	79515724	MACS_peak_35	56.36	5_Distal	-43229	79472495	79355449	-	ADGRL4
chr1	80064594	80064595	MACS_peak_36	51.33	Intergenic	-592100	79472495	79355449	-	ADGRL4
chr1	82267057	82267058	MACS_peak_37	104.73	5_TSS	976	82266082	82458422	+	ADGRL2_dup1
chr1	83717558	83717559	MACS_peak_38	65.8	Intergenic	-266954	83450605	83439566	-	LINC01361_dup1
chr1	84753260	84753261	MACS_peak_39	217.41	5_Distal	-10788	84764049	84816481	+	SAMD13
chr1	88456926	88456927	MACS_peak_40	57.45	Intergenic	-619589	87837338	87819210	-	LINC01364
chr1	89487520	89487521	MACS_peak_41	68.56	Intragenic	1028	89488549	89472360	-	GBP3_dup1
chr1	93297486	93297487	MACS_peak_42	55.68	5_TSS	-107	93297594	93307481	+	RPL5
chr1	93990029	93990030	MACS_peak_43	51.8	3_Distal	60689	94050719	94027298	-	BCAR3
chr1	94159765	94159766	MACS_peak_44	58.34	5_Distal	-12372	94147394	94027343	-	BCAR3_dup3
chr1	94299088	94299089	MACS_peak_45	173.44	5_Distal	-13299	94312388	94312467	+	MIR760
chr1	105467299	105467300	MACS_peak_46	56.57	Intergenic	694257	106161557	106132316	-	LINC01676
chr1	142787996	142787997	MACS_peak_47	52.22	5_Distal	-74392	142713605	142697421	-	ANKRD20A12P
chr1	144019460	144019461	MACS_peak_48	51.33	Intergenic	-106301	143913160	143904509	-	FAM72C_dup5
chr1	147012050	147012051	MACS_peak_49	73.24	5_TSS	-1220	147013271	147098020	+	BCL9
chr1	147012890	147012891	MACS_peak_50	141.32	5_TSS	-380	147013271	147098020	+	BCL9
chr1	149283349	149283350	MACS_peak_51	56.04	5_TSS	-4885	149288235	149291701	+	FAM231D_dup1
chr1	149911440	149911441	MACS_peak_52	140.72	5_TSS	-2650	149908791	149900543	-	MTMR11_dup1
chr1	154355233	154355234	MACS_peak_53	58.54	5_Distal	-22435	154377669	154441926	+	IL6R_dup1
chr1	154457857	154457858	MACS_peak_54	50.78	Intragenic	16668	154474526	154451954	-	SHE
chr1	154973364	154973365	MACS_peak_55	343.21	5_TSS	-1741	154975106	154991001	+	ZBTB7B_dup1
chr1	155145838	155145839	MACS_peak_56	52.18	5_TSS	-35	155145804	155141884	-	KRTCAP2
chr1	155214592	155214593	MACS_peak_57	736.12	5_TSS	60	155214653	155204239	-	GBA_dup1
chr1	156056176	156056177	MACS_peak_58	63.37	5_TSS	-4388	156051789	156041804	-	MEX3A
chr1	156391576	156391577	MACS_peak_59	75.96	5_TSS	-1356	156390221	156390133	-	MIR9-1
chr1	156988630	156988631	MACS_peak_60	51.08	3_Distal	80969	157069600	157061835	-	ETV3L
chr1	159693181	159693182	MACS_peak_61	108.3	5_Proximal	-8803	159684379	159682079	-	CRP_dup1
chr1	160001855	160001856	MACS_peak_62	175.1	5_TSS	-73	160001783	159997462	-	PIGM
chr1	161067460	161067461	MACS_peak_63	223.35	5_TSS	-690	161068151	161070138	+	KLHDC9_dup1
chr1	161706334	161706335	MACS_peak_64	59.15	5_Distal	-13223	161719558	161726954	+	DUSP12
chr1	162613685	162613686	MACS_peak_65	55.64	3_Distal	82456	162531230	162569633	+	UAP1_dup1
chr1	162985283	162985284	MACS_peak_66	52.67	5_Distal	-53112	163038396	163046592	+	RGS4
chr1	163431496	163431497	MACS_peak_67	53.01	5_Distal	-38516	163392981	163390860	-	LOC100422212
chr1	165318676	165318677	MACS_peak_68	54.88	3_Distal	95915	165414592	165370159	-	RXRG_dup1
chr1	171523238	171523239	MACS_peak_69	54.25	Intragenic	68573	171454666	171562650	+	PRRC2C
chr1	172589963	172589964	MACS_peak_70	54.19	5_Distal	-38184	172628148	172636012	+	FASLG_dup1
chr1	173287610	173287611	MACS_peak_71	71.4	Intragenic	158683	173446294	173204199	-	LOC100506023
chr1	176536411	176536412	MACS_peak_72	50.17	Intragenic	104105	176432307	176660341	+	PAPPA2_dup1
chr1	176921513	176921514	MACS_peak_73	56.4	3_Distal	77067	176998581	176998499	-	MIR488
chr1	177395355	177395356	MACS_peak_74	60.09	3_Distal	74634	177320722	177335594	+	LINC01645
chr1	178870712	178870713	MACS_peak_75	51.76	5_Distal	-30498	178840215	178818670	-	ANGPTL1
chr1	180992364	180992365	MACS_peak_76	84.03	5_Distal	-10196	181002561	181031074	+	MR1_dup1
chr1	182951865	182951866	MACS_peak_77	52.67	5_Distal	-29206	182922660	182868998	-	SHCBP1L_dup1
chr1	183265969	183265970	MACS_peak_78	56.72	Intragenic	8039	183274009	183217372	-	NMNAT2
chr1	183590394	183590395	MACS_peak_79	53.34	3_TTS	14681	183605076	183595328	-	ARPC5_dup1
chr1	184753052	184753053	MACS_peak_80	61.34	5_Distal	-29012	184724041	184659625	-	EDEM3_dup1
chr1	185547749	185547750	MACS_peak_81	52.24	Intragenic	49870	185597620	185527512	-	LINC01350
chr1	190069243	190069244	MACS_peak_82	56.86	Intragenic	375896	190445140	190066797	-	BRINP3
chr1	190299441	190299442	MACS_peak_83	51.33	Intragenic	145698	190445140	190066797	-	BRINP3
chr1	190394960	190394961	MACS_peak_84	63.97	5_Distal	-52429	190447390	190450524	+	LINC01351
chr1	191015531	191015532	MACS_peak_85	56.69	Intergenic	421512	190594020	190770788	+	LINC01720
chr1	195972115	195972116	MACS_peak_86	60.11	Intergenic	579495	196551611	196551543	-	MIR4735
chr1	197170658	197170659	MACS_peak_87	78.38	5_TSS	-987	197169672	197122814	-	ZBTB41_dup1
chr1	200119121	200119122	MACS_peak_88	57.88	Intragenic	107169	200011953	200146550	+	NR5A2_dup2
chr1	200639282	200639283	MACS_peak_89	199.91	5_TSS	-157	200639126	200609935	-	DDX59
chr1	207997389	207997390	MACS_peak_90	290.01	5_TSS	-1342	207996048	207974863	-	C1orf132_dup1
chr1	220263255	220263256	MACS_peak_91	168.93	5_TSS	-61	220263195	220230824	-	BPNT1_dup1
chr1	220267331	220267332	MACS_peak_92	240.38	5_TSS	-123	220267455	220321383	+	IARS2
chr1	223893880	223893881	MACS_peak_93	91.63	Intragenic	4586	223889295	223963720	+	CAPN2
chr1	225177752	225177753	MACS_peak_94	52.47	3_Distal	60390	225117363	225155626	+	DNAH14_dup2
chr1	227688398	227688399	MACS_peak_95	61.84	5_Distal	-62821	227751220	227850164	+	ZNF678_dup1
chr1	229539975	229539976	MACS_peak_96	59.83	3_Distal	29867	229569843	229566993	-	ACTA1
chr1	233294459	233294460	MACS_peak_97	56.17	Intragenic	136999	233431459	233119882	-	PCNX2
chr1	238006214	238006215	MACS_peak_98	54.72	5_Distal	-19260	238025475	238091619	+	LOC100130331
chr1	242650795	242650796	MACS_peak_99	55.09	Intragenic	37202	242687998	242251689	-	PLD5_dup1
chr10	38358720	38358721	MACS_peak_100	97.3	5_Distal	-24543	38383264	38439197	+	ZNF37A_dup10
chr10	52384442	52384443	MACS_peak_101	152.92	5_TSS	-268	52384711	52391396	+	SGMS1-AS1
chr10	60028740	60028741	MACS_peak_102	121.84	5_TSS	-121	60028862	60049019	+	CISD1
chr10	89622245	89622246	MACS_peak_103	156.3	5_TSS	948	89623194	89618918	-	KLLN
chr10	95198654	95198655	MACS_peak_104	86.78	5_Distal	-57714	95256369	95288849	+	CEP55
chr10	99599995	99599996	MACS_peak_105	56.96	Intragenic	9559	99609555	99588235	-	LINC00866
chr11	14913321	14913322	MACS_peak_106	84.26	5_TSS	429	14913751	14899556	-	CYP2R1
chr11	19454103	19454104	MACS_peak_107	445.83	3_Distal	74672	19528776	19524220	-	NAV2-AS5
chr11	55787441	55787442	MACS_peak_108	53.31	5_Distal	-10453	55797895	55798869	+	OR5AS1
chr11	55796114	55796115	MACS_peak_109	52.08	5_TSS	-1780	55797895	55798869	+	OR5AS1
chr11	56300826	56300827	MACS_peak_110	52.32	3_Proximal	9906	56310733	56309816	-	OR5M11
chr11	58481644	58481645	MACS_peak_111	54.63	Intragenic	17802	58499447	58476230	-	GLYAT
chr11	59095353	59095354	MACS_peak_112	50.49	5_Distal	-36578	59131932	59132867	+	OR5AN1
chr11	61348966	61348967	MACS_peak_113	608.48	5_Proximal	-6999	61355966	61375018	+	LOC101927495
chr11	61604364	61604365	MACS_peak_114	51.15	5_Distal	-21653	61582712	61582633	-	MIR1908
chr11	67113775	67113776	MACS_peak_115	217.61	3_TTS	7291	67121067	67118236	-	POLD4_dup1
chr11	69252302	69252303	MACS_peak_116	74.03	3_Proximal	11864	69240439	69244389	+	LOC102724265
chr11	71752840	71752841	MACS_peak_117	100.48	3_Distal	27504	71725337	71731956	+	LOC100128494
chr11	76847527	76847528	MACS_peak_118	56.81	3_Distal	69536	76777992	76837198	+	CAPN5
chr11	77706129	77706130	MACS_peak_119	130.12	5_TSS	-413	77705717	77589766	-	INTS4
chr11	80327684	80327685	MACS_peak_120	53.17	Intergenic	146161	80473846	80462244	-	LOC101928944
chr11	83910351	83910352	MACS_peak_121	56.6	Intragenic	73971	83984323	83166056	-	DLG2_dup1
chr11	87094028	87094029	MACS_peak_122	60.71	3_Distal	345143	86748886	87039876	+	TMEM135_dup1
chr11	87207507	87207508	MACS_peak_123	54.95	Intergenic	222795	87430303	87429246	-	LOC105369423
chr11	88754181	88754182	MACS_peak_124	59.4	Intragenic	27058	88781240	88237744	-	GRM5
chr11	97380480	97380481	MACS_peak_125	60.51	Intergenic	1138892	96241589	96247914	+	LOC105369443
chr11	99857637	99857638	MACS_peak_126	52.32	Intragenic	430762	99426876	100229616	+	CNTN5_dup3
chr11	103358436	103358437	MACS_peak_127	55.75	3_Proximal	378277	102980160	103350591	+	DYNC2H1_dup1
chr11	105874047	105874048	MACS_peak_128	66.06	3_TTS	18966	105893014	105878648	-	MSANTD4_dup1
chr11	109416107	109416108	MACS_peak_129	54.25	Intergenic	123262	109292846	109299893	+	C11orf87
chr11	110585420	110585421	MACS_peak_130	59.73	5_TSS	-1509	110583912	110447759	-	ARHGAP20_dup1
chr11	111895719	111895720	MACS_peak_131	76.98	5_TSS	182	111895538	111935002	+	DLAT
chr11	112760140	112760141	MACS_peak_132	52.56	5_Distal	-71828	112831969	113149158	+	NCAM1_dup1
chr11	116911343	116911344	MACS_peak_133	52.85	Intragenic	57787	116969131	116714118	-	SIK3_dup1
chr11	122989585	122989586	MACS_peak_134	260.43	5_Distal	-56543	122933043	122928200	-	HSPA8_dup1
chr11	128146279	128146280	MACS_peak_135	57.74	Intergenic	245925	128392205	128328656	-	ETS1_dup1
chr11	131873829	131873830	MACS_peak_136	54.72	Intragenic	93118	131780712	132184961	+	NTM_dup1
chr11	134177312	134177313	MACS_peak_137	66.98	5_Distal	-24455	134201768	134246218	+	GLB1L2
chr12	7034913	7034914	MACS_peak_138	54.72	3_TTS	11300	7023614	7032859	+	ENO2
chr12	7035079	7035080	MACS_peak_139	98.26	3_TTS	11466	7023614	7032859	+	ENO2
chr12	14410855	14410856	MACS_peak_140	954.32	Intergenic	-107710	14518566	14655869	+	ATF7IP_dup1
chr12	14537969	14537970	MACS_peak_141	164.73	5_TSS	-28	14537998	14655869	+	ATF7IP_dup3
chr12	14547609	14547610	MACS_peak_142	88.69	Intragenic	9612	14537998	14655869	+	ATF7IP_dup3
chr12	23828853	23828854	MACS_peak_143	60.87	5_Distal	-91308	23737546	23682438	-	SOX5_dup1
chr12	30226048	30226049	MACS_peak_144	61.14	Intergenic	-288357	29937692	29653746	-	TMTC1_dup1
chr12	40263090	40263091	MACS_peak_145	52.96	Intragenic	236570	40499661	40148823	-	SLC2A13
chr12	40418035	40418036	MACS_peak_146	52.24	Intragenic	81625	40499661	40148823	-	SLC2A13
chr12	41191052	41191053	MACS_peak_147	54.32	5_Distal	-30687	41221740	41366519	+	CNTN1_dup2
chr12	45293751	45293752	MACS_peak_148	56.17	Intragenic	13959	45307711	44902058	-	NELL2_dup4
chr12	46519663	46519664	MACS_peak_149	57.17	3_Distal	143544	46663208	46576840	-	SLC38A1_dup1
chr12	48084206	48084207	MACS_peak_150	56.82	3_Distal	35148	48119355	48103518	-	ENDOU_dup1
chr12	53155201	53155202	MACS_peak_151	86.07	3_Proximal	15927	53171129	53161939	-	KRT76
chr12	53297297	53297298	MACS_peak_152	69.09	Intragenic	1570	53298868	53290971	-	KRT8_dup1
chr12	57047748	57047749	MACS_peak_153	96.04	5_Proximal	-8864	57038885	57038811	-	SNORD59A
chr12	57276405	57276406	MACS_peak_154	125.06	3_Distal	51783	57328189	57316938	-	SDR9C7
chr12	57853353	57853354	MACS_peak_155	69.09	5_TSS	-564	57853918	57866047	+	GLI1
chr12	57853495	57853496	MACS_peak_156	166.85	5_TSS	-422	57853918	57866047	+	GLI1
chr12	57856290	57856291	MACS_peak_157	189.03	3_TTS	7217	57849074	57851796	+	INHBE
chr12	59769858	59769859	MACS_peak_158	54.05	Intergenic	-219962	59989821	60183635	+	SLC16A7_dup1
chr12	62654008	62654009	MACS_peak_159	124	5_TSS	-131	62654140	62654235	+	MIR6125
chr12	71201896	71201897	MACS_peak_160	75.83	5_Distal	-53509	71148388	71031853	-	PTPRR_dup1
chr12	71829041	71829042	MACS_peak_161	65.25	5_TSS	-4508	71833550	71980088	+	LGR5_dup1
chr12	73521885	73521886	MACS_peak_162	51.55	5_Distal	-31084	73552970	73602097	+	LOC101928137
chr12	75724188	75724189	MACS_peak_163	394.86	5_TSS	-4230	75728419	75764169	+	GLIPR1L1_dup1
chr12	75724349	75724350	MACS_peak_164	62.53	5_TSS	-4069	75728419	75764169	+	GLIPR1L1_dup1
chr12	75851977	75851978	MACS_peak_165	178.42	5_Distal	-22535	75874513	75895716	+	GLIPR1
chr12	91775974	91775975	MACS_peak_166	60.77	Intergenic	-203552	91572423	91537054	-	DCN_dup1
chr12	102888135	102888136	MACS_peak_167	62.62	5_Distal	-13713	102874423	102789645	-	IGF1_dup1
chr12	110547344	110547345	MACS_peak_168	109.21	5_Distal	-14795	110562140	110656600	+	IFT81_dup1
chr12	114418513	114418514	MACS_peak_169	51.85	5_Distal	-14338	114404176	114254543	-	RBM19
chr12	116872106	116872107	MACS_peak_170	54.96	5_Proximal	-5984	116866123	116866057	-	MIR4472-2
chr12	125401826	125401827	MACS_peak_171	188.95	3_TTS	1734	125400093	125400205	+	MIR5188
chr12	131632230	131632231	MACS_peak_172	56.42	5_Distal	-17325	131649556	131697476	+	LINC01257
chr13	20278507	20278508	MACS_peak_173	56.98	3_Distal	70720	20207788	20247599	+	MPHOSPH8
chr13	27617414	27617415	MACS_peak_174	96.04	5_Distal	-82255	27699670	27743272	+	USP12-AS1
chr13	28051165	28051166	MACS_peak_175	57.69	5_Distal	-26427	28024739	28009776	-	MTIF3_dup2
chr13	41749933	41749934	MACS_peak_176	143.61	3_Distal	18777	41768711	41765541	-	KBTBD7
chr13	59523944	59523945	MACS_peak_177	62.37	Intergenic	-716694	58807251	58785831	-	LINC00374
chr13	67334969	67334970	MACS_peak_178	76.86	5_Distal	-64331	67399301	67489163	+	PCDH9-AS2
chr13	67804649	67804650	MACS_peak_179	140.17	5_TSS	-182	67804468	66876966	-	PCDH9_dup1
chr13	69617168	69617169	MACS_peak_180	55.2	Intergenic	-157712	69459457	69435417	-	LINC00550
chr13	74244233	74244234	MACS_peak_181	57.43	3_Distal	105853	74138381	74162016	+	LINC00392
chr13	74321614	74321615	MACS_peak_182	52.56	Intragenic	386451	74708066	74260149	-	KLF12
chr13	77901369	77901370	MACS_peak_183	215.64	5_TSS	-193	77901177	77618792	-	MYCBP2
chr13	77903357	77903358	MACS_peak_184	186.77	5_TSS	-2181	77901177	77618792	-	MYCBP2
chr13	78271809	78271810	MACS_peak_185	71.27	5_TSS	-179	78271989	78338377	+	SLAIN1
chr13	78918909	78918910	MACS_peak_186	51.38	Intergenic	258785	79177695	79173230	-	POU4F1
chr13	96680823	96680824	MACS_peak_187	68.16	Intragenic	24912	96705736	96453836	-	UGGT2
chr13	96760462	96760463	MACS_peak_188	57.69	5_Distal	-54727	96705736	96453836	-	UGGT2
chr13	97603709	97603710	MACS_peak_189	62.81	Intragenic	32716	97636426	97593535	-	LINC00359
chr13	98085549	98085550	MACS_peak_190	225.42	5_TSS	-925	98086475	98120252	+	RAP2A
chr13	100151066	100151067	MACS_peak_191	130.91	5_TSS	493	100151560	100139216	-	LINC01232
chr13	100153590	100153591	MACS_peak_192	263.28	5_TSS	-274	100153317	100151977	-	LINC00449
chr13	114150381	114150382	MACS_peak_193	55.68	5_Proximal	-5359	114145023	114110134	-	DCUN1D2
chr14	19814653	19814654	MACS_peak_194	54.96	5_Distal	-74732	19889386	19904572	+	BMS1P22_dup1
chr14	20587003	20587004	MACS_peak_195	57.24	3_TTS	1438	20585566	20586597	+	OR4K17
chr14	20587147	20587148	MACS_peak_196	81.69	3_TTS	1582	20585566	20586597	+	OR4K17
chr14	22665360	22665361	MACS_peak_197	52.54	Intergenic	392782	23058143	23033807	-	DAD1
chr14	22812812	22812813	MACS_peak_198	77.63	Intergenic	245330	23058143	23033807	-	DAD1
chr14	24836165	24836166	MACS_peak_199	125.34	5_TSS	-1060	24837226	24848810	+	NFATC4_dup3
chr14	24836375	24836376	MACS_peak_200	709.73	5_TSS	-850	24837226	24848810	+	NFATC4_dup3
chr14	27425950	27425951	MACS_peak_201	52.63	3_Distal	48103	27377848	27377931	+	MIR4307
chr14	33407651	33407652	MACS_peak_202	95.14	5_TSS	-807	33408459	34273382	+	NPAS3_dup1
chr14	33537268	33537269	MACS_peak_203	55.02	Intragenic	128810	33408459	34273382	+	NPAS3_dup1
chr14	37223111	37223112	MACS_peak_204	62.16	3_Distal	96339	37126773	37147011	+	PAX9
chr14	37777710	37777711	MACS_peak_205	50.44	Intragenic	110593	37667118	38020464	+	MIPOL1_dup1
chr14	41044887	41044888	MACS_peak_206	50.78	Intergenic	-379028	41423916	41610251	+	LOC644919_dup1
chr14	42320010	42320011	MACS_peak_207	53.74	Intragenic	243952	42076059	42373752	+	LRFN5_dup1
chr14	45545887	45545888	MACS_peak_208	57.79	5_Proximal	-7414	45553302	45584804	+	PRPF39
chr14	45751134	45751135	MACS_peak_209	83.08	5_Distal	-28530	45722605	45672393	-	MIS18BP1
chr14	47651569	47651570	MACS_peak_210	65.98	Intragenic	160879	47812449	47308826	-	MDGA2
chr14	49822613	49822614	MACS_peak_211	56.17	Intergenic	230520	50053134	50043390	-	RPS29
chr14	55581237	55581238	MACS_peak_212	52.67	5_Distal	-14697	55595935	55612148	+	LGALS3_dup1
chr14	65757509	65757510	MACS_peak_213	51.11	3_Distal	44391	65801901	65801836	-	MIR4708
chr14	65864344	65864345	MACS_peak_214	55.75	5_Distal	-12965	65877310	66210839	+	FUT8_dup1
chr14	65913016	65913017	MACS_peak_215	82.86	5_Distal	-24803	65937820	65937904	+	MIR625
chr14	67094816	67094817	MACS_peak_216	53.28	Intragenic	120692	66974125	67648525	+	GPHN_dup1
chr14	68283460	68283461	MACS_peak_217	68.23	5_TSS	-155	68283306	68213237	-	ZFYVE26
chr14	73568586	73568587	MACS_peak_218	51.15	5_Distal	-34556	73603143	73690399	+	PSEN1_dup1
chr14	75232290	75232291	MACS_peak_219	51.85	3_Distal	52441	75179850	75203390	+	FCF1
chr14	75886222	75886223	MACS_peak_220	74.01	5_Proximal	-8286	75894509	75939404	+	JDP2
chr14	76726572	76726573	MACS_peak_221	51.32	3_Distal	105876	76620697	76679146	+	GPATCH2L_dup8
chr14	80383826	80383827	MACS_peak_222	57.55	3_Distal	1747111	78636716	80334633	+	NRXN3_dup1
chr14	86818147	86818148	MACS_peak_223	52.04	Intergenic	417126	86401022	86596121	+	LOC101928767
chr14	88253101	88253102	MACS_peak_224	53.01	Intergenic	206513	88459615	88399358	-	GALC_dup2
chr14	98735000	98735001	MACS_peak_225	60.89	Intergenic	-290540	98444461	98391947	-	LINC01550
chr14	101458053	101458054	MACS_peak_226	55.23	5_TSS	-202	101458256	101458326	+	SNORD114-30
chr14	104454295	104454296	MACS_peak_227	63.72	5_Distal	-45651	104408645	104406763	-	RD3L
chr15	25601226	25601227	MACS_peak_228	50.56	Intragenic	49426	25650653	25582396	-	UBE3A_dup1
chr15	26440651	26440652	MACS_peak_229	52.05	3_Distal	79692	26360960	26378184	+	LINC00929_dup1
chr15	27429109	27429110	MACS_peak_230	89.44	5_Distal	-22644	27406466	27402882	-	GABRG3-AS1
chr15	29886120	29886121	MACS_peak_231	55.62	5_Distal	-81018	29967139	29971367	+	LOC100130111
chr15	31477807	31477808	MACS_peak_232	57.43	5_Distal	-24332	31453476	31293264	-	TRPM1_dup1
chr15	35135539	35135540	MACS_peak_233	74.56	5_Distal	-47613	35087927	35080297	-	ACTC1
chr15	44580600	44580601	MACS_peak_234	533.46	5_TSS	-308	44580909	44707959	+	CASC4_dup1
chr15	44580794	44580795	MACS_peak_235	272.35	5_TSS	-114	44580909	44707959	+	CASC4_dup1
chr15	45500472	45500473	MACS_peak_236	58.03	5_Distal	-27068	45473405	45459412	-	SHF_dup1
chr15	46389442	46389443	MACS_peak_237	54.96	Intergenic	392050	45997393	46223267	+	LOC105370802
chr15	46706920	46706921	MACS_peak_238	55.74	Intergenic	709528	45997393	46223267	+	LOC105370802
chr15	53559830	53559831	MACS_peak_239	54.46	Intergenic	273218	53833049	53805938	-	WDR72_dup3
chr15	55033863	55033864	MACS_peak_240	57.71	Intergenic	-315081	55348945	55384371	+	LOC105370829
chr15	56276812	56276813	MACS_peak_241	52.29	Intragenic	9131	56285944	56119117	-	NEDD4_dup1
chr15	57025839	57025840	MACS_peak_242	71.29	5_TSS	444	57026284	56922374	-	ZNF280D_dup1
chr15	58483617	58483618	MACS_peak_243	55.89	3_Proximal	53223	58430395	58478107	+	AQP9_dup1
chr15	58759415	58759416	MACS_peak_244	277.31	Intragenic	31518	58790934	58727100	-	LIPC-AS1
chr15	58759988	58759989	MACS_peak_245	151.83	Intragenic	30945	58790934	58727100	-	LIPC-AS1
chr15	60006834	60006835	MACS_peak_246	51.38	5_Distal	-25102	59981733	59951345	-	BNIP2_dup1
chr15	60691306	60691307	MACS_peak_247	113.53	5_TSS	-1122	60690185	60639350	-	ANXA2_dup1
chr15	61991495	61991496	MACS_peak_248	53.3	Intergenic	361168	62352664	62144590	-	VPS13C_dup1
chr15	62434797	62434798	MACS_peak_249	54.72	3_Distal	22684	62457482	62455737	-	C2CD4B
chr15	63795605	63795606	MACS_peak_250	226.19	5_TSS	-1104	63796710	63886839	+	USP3_dup1
chr15	63796723	63796724	MACS_peak_251	200.14	5_TSS	14	63796710	63886839	+	USP3_dup1
chr15	64752387	64752388	MACS_peak_252	82.67	5_Distal	-39231	64791619	64978266	+	ZNF609
chr15	64752704	64752705	MACS_peak_253	438.93	5_Distal	-38914	64791619	64978266	+	ZNF609
chr15	65810085	65810086	MACS_peak_254	51.8	5_Distal	-12741	65822827	65870693	+	HACD3
chr15	68132570	68132571	MACS_peak_255	673.27	5_TSS	-1354	68131217	68126646	-	LOC101929076
chr15	69479014	69479015	MACS_peak_256	56.26	Intragenic	26079	69452936	69564544	+	GLCE_dup1
chr15	70394065	70394066	MACS_peak_257	349.65	5_Distal	-22259	70371807	70371711	-	MIR629
chr15	70403815	70403816	MACS_peak_258	278.57	5_Distal	-32009	70371807	70371711	-	MIR629
chr15	75016571	75016572	MACS_peak_259	564.56	Intragenic	1379	75017951	75011883	-	CYP1A1_dup1
chr15	75016893	75016894	MACS_peak_260	81.15	Intragenic	1057	75017951	75011883	-	CYP1A1_dup1
chr15	75017783	75017784	MACS_peak_261	54.72	5_TSS	167	75017951	75011883	-	CYP1A1_dup1
chr15	76520234	76520235	MACS_peak_262	62.01	3_Distal	32258	76552493	76551630	-	TYRO3P
chr15	81524736	81524737	MACS_peak_263	53.06	3_Distal	91787	81616524	81605007	-	STARD5
chr15	85523635	85523636	MACS_peak_264	132.15	5_TSS	-108	85523744	85682376	+	PDE8A
chr15	85524632	85524633	MACS_peak_265	243.83	5_TSS	-572	85525205	85682372	+	PDE8A_dup1
chr15	92018830	92018831	MACS_peak_266	53.3	Intragenic	12262	92006569	92038080	+	CRAT37
chr15	92527880	92527881	MACS_peak_267	62.82	Intragenic	130351	92397530	92698549	+	SLCO3A1_dup2
chr15	93117404	93117405	MACS_peak_268	52.08	5_TSS	-1912	93115493	93111048	-	LINC00930
chr15	94751603	94751604	MACS_peak_269	59.83	5_Distal	-89826	94841430	95027181	+	MCTP2_dup1
chr15	98164925	98164926	MACS_peak_270	55.08	5_Distal	-60998	98103928	98096514	-	LOC101927310
chr15	99396619	99396620	MACS_peak_271	156.71	3_Distal	68965	99327655	99327731	+	MIR4714
chr15	101286278	101286279	MACS_peak_272	65.29	3_Distal	143524	101142755	101191904	+	ASB7_dup1
chr16	2441358	2441359	MACS_peak_273	55.68	5_Distal	-38033	2479392	2508855	+	CCNF
chr16	5238358	5238359	MACS_peak_274	57.43	5_Distal	-90538	5147821	5134301	-	EEF2KMT_dup1
chr16	8344056	8344057	MACS_peak_275	55.2	Intergenic	243771	8587828	8587571	-	TMEM114_dup1
chr16	33901700	33901701	MACS_peak_276	52.59	3_Distal	60802	33962503	33961052	-	LINC00273
chr16	33936767	33936768	MACS_peak_277	60.7	3_Distal	25735	33962503	33961052	-	LINC00273
chr16	46421385	46421386	MACS_peak_278	54.32	3_Distal	181623	46603009	46503249	-	ANKRD26P1
chr16	49481549	49481550	MACS_peak_279	54.88	3_Distal	70946	49552496	49551557	-	ADAM3B
chr16	52026535	52026536	MACS_peak_280	57.03	3_Distal	81311	52107847	52060264	-	C16orf97
chr16	52885341	52885342	MACS_peak_281	59.22	Intergenic	201443	53086785	53069602	-	LOC105371267
chr16	53458166	53458167	MACS_peak_282	52.29	5_Distal	-10165	53468332	53525560	+	RBL2_dup1
chr16	57840657	57840658	MACS_peak_283	59.28	5_TSS	-3891	57844549	57850831	+	LOC388282
chr16	60284965	60284966	MACS_peak_284	65.66	Intergenic	108731	60393697	60391589	-	LOC729159
chr16	61601395	61601396	MACS_peak_285	55.36	3_Distal	469343	62070739	61685915	-	CDH8
chr16	61605620	61605621	MACS_peak_286	50.19	3_Distal	465118	62070739	61685915	-	CDH8
chr16	62975388	62975389	MACS_peak_287	58.12	Intergenic	-904650	62070739	61685915	-	CDH8
chr16	64537196	64537197	MACS_peak_288	57.17	Intergenic	618843	65156040	64977657	-	CDH11_dup1
chr16	69603758	69603759	MACS_peak_289	54.22	5_TSS	-3988	69599771	69599711	-	MIR1538
chr16	72779609	72779610	MACS_peak_290	52.67	5_Distal	-80702	72698908	72317200	-	LINC01572
chr16	74778104	74778105	MACS_peak_291	277.27	Intragenic	30624	74808729	74746856	-	FA2H
chr16	76441068	76441069	MACS_peak_292	64.52	Intragenic	97334	76343735	76594647	+	CNTNAP4_dup13
chr16	78133406	78133407	MACS_peak_293	430.39	5_TSS	97	78133310	78134096	+	WWOX_dup1
chr16	80804515	80804516	MACS_peak_294	66.5	3_Distal	121977	80926493	80862632	-	LINC02170_dup1
chr16	83986446	83986447	MACS_peak_295	198.65	5_TSS	-380	83986827	83999937	+	OSGIN1
chr16	87526867	87526868	MACS_peak_296	125.23	5_TSS	-925	87527793	87549236	+	LOC101928737
chr17	2304931	2304932	MACS_peak_297	132.68	5_TSS	-674	2304258	2287354	-	MNT
chr17	6434455	6434456	MACS_peak_298	50.92	3_Distal	109791	6544247	6481645	-	KIAA0753
chr17	7620637	7620638	MACS_peak_299	360.75	5_TSS	-34	7620672	7737062	+	DNAH2
chr17	7740288	7740289	MACS_peak_300	333.74	5_TSS	-2935	7743224	7758108	+	KDM6B
chr17	8286611	8286612	MACS_peak_301	59.46	5_TSS	-47	8286565	8280834	-	RPL26_dup1
chr17	12669546	12669547	MACS_peak_302	59.01	5_Distal	-23282	12692829	12894961	+	ARHGAP44_dup1
chr17	26022257	26022258	MACS_peak_303	60.71	3_Distal	64084	25958174	25976586	+	LGALS9_dup1
chr17	26022506	26022507	MACS_peak_304	111.7	3_Distal	64333	25958174	25976586	+	LGALS9_dup1
chr17	26589332	26589333	MACS_peak_305	66.82	3_Distal	14863	26574470	26575315	+	PPY2P
chr17	29034821	29034822	MACS_peak_306	63.91	5_TSS	-1804	29036626	29103447	+	SUZ12P1_dup1
chr17	29035033	29035034	MACS_peak_307	130.86	5_TSS	-1592	29036626	29103447	+	SUZ12P1_dup1
chr17	29035194	29035195	MACS_peak_308	89.05	5_TSS	-1431	29036626	29103447	+	SUZ12P1_dup1
chr17	29035350	29035351	MACS_peak_309	183.95	5_TSS	-1275	29036626	29103447	+	SUZ12P1_dup1
chr17	29035961	29035962	MACS_peak_310	441.04	5_TSS	-664	29036626	29103447	+	SUZ12P1_dup1
chr17	36754944	36754945	MACS_peak_311	629.06	Intragenic	7238	36762183	36686259	-	SRCIN1
chr17	38579544	38579545	MACS_peak_312	178.46	5_Distal	-20131	38599676	38613982	+	IGFBP4
chr17	41535686	41535687	MACS_peak_313	114.36	3_Distal	13513	41522174	41522253	+	MIR2117
chr17	56990274	56990275	MACS_peak_314	51.58	3_Distal	194007	57184282	57060000	-	TRIM37_dup1
chr17	58160495	58160496	MACS_peak_315	56.99	3_TTS	5332	58165828	58160927	-	WFDC21P
chr17	59545099	59545100	MACS_peak_316	148.28	Intragenic	11251	59533849	59562471	+	TBX4_dup1
chr17	61920153	61920154	MACS_peak_317	812.03	5_TSS	-328	61919826	61909441	-	SMARCD2_dup1
chr17	68342607	68342608	MACS_peak_318	56.4	Intergenic	176932	68165676	68176183	+	KCNJ2
chr17	70599195	70599196	MACS_peak_319	80.95	5_Distal	-10251	70588945	70399523	-	LINC00673_dup1
chr17	76569151	76569152	MACS_peak_320	86.78	3_Distal	58987	76628139	76613466	-	LINC02081_dup1
chr17	78129498	78129499	MACS_peak_321	246.59	5_Proximal	-8517	78120982	78109013	-	EIF4A3
chr17	78716589	78716590	MACS_peak_322	56.12	3_Distal	62842	78779432	78775440	-	LOC101928855
chr17	80712761	80712762	MACS_peak_323	235.01	3_TTS	19310	80693452	80709073	+	FN3K
chr18	3297569	3297570	MACS_peak_324	55.15	3_Distal	34853	3262717	3278282	+	MYL12B_dup2
chr18	6627637	6627638	MACS_peak_325	61.13	3_Distal	116223	6511415	6590652	+	LINC01387
chr18	14784041	14784042	MACS_peak_326	53.19	5_Distal	-46123	14830165	14830241	+	MIR3156-2
chr18	33077943	33077944	MACS_peak_327	186.29	5_TSS	11	33077955	33048291	-	INO80C_dup1
chr18	33709387	33709388	MACS_peak_328	62.37	5_TSS	-31	33709357	33688494	-	SLC39A6
chr18	33709786	33709787	MACS_peak_329	315.74	5_TSS	-430	33709357	33690963	-	SLC39A6_dup1
chr18	61034966	61034967	MACS_peak_330	433.22	5_TSS	-461	61034506	60994971	-	KDSR
chr19	2463207	2463208	MACS_peak_331	112.95	5_TSS	-1025	2462183	2458935	-	LINC01775
chr19	3721529	3721530	MACS_peak_332	379.36	5_TSS	-167	3721697	3750811	+	TJP3_dup1
chr19	3722950	3722951	MACS_peak_333	90.35	3_Distal	38722	3761673	3750771	-	APBA3
chr19	4581870	4581871	MACS_peak_334	73.72	5_Distal	-22100	4559771	4542600	-	SEMA6B
chr19	4584319	4584320	MACS_peak_335	60.41	5_Distal	-24549	4559771	4542600	-	SEMA6B
chr19	7294393	7294394	MACS_peak_336	102.06	5_TSS	-81	7294313	7112266	-	INSR_dup1
chr19	12947260	12947261	MACS_peak_337	246.8	5_TSS	-1871	12945390	12936291	-	RTBDN_dup1
chr19	14317685	14317686	MACS_peak_338	191.95	5_TSS	-689	14316997	14258549	-	ADGRL1_dup1
chr19	14318157	14318158	MACS_peak_339	453.82	5_TSS	-1161	14316997	14258549	-	ADGRL1_dup1
chr19	14318587	14318588	MACS_peak_340	220.7	5_TSS	-1591	14316997	14258549	-	ADGRL1_dup1
chr19	15306971	15306972	MACS_peak_341	109.32	5_Distal	-16811	15290161	15290094	-	MIR6795
chr19	21412924	21412925	MACS_peak_342	70.39	3_Distal	88112	21324813	21368805	+	ZNF431_dup1
chr19	23531780	23531781	MACS_peak_343	80.26	3_Proximal	46581	23578362	23540498	-	ZNF91_dup1
chr19	27814293	27814294	MACS_peak_344	52.67	Intergenic	-470081	28284375	28297688	+	LOC101927151_dup1
chr19	35456510	35456511	MACS_peak_345	58.74	5_TSS	-1558	35454953	35447258	-	ZNF792
chr19	35739061	35739062	MACS_peak_346	170.32	5_TSS	-497	35739559	35758867	+	LSR_dup1
chr19	35739306	35739307	MACS_peak_347	114.91	5_TSS	-252	35739559	35758867	+	LSR_dup1
chr19	37464432	37464433	MACS_peak_348	54.49	3_Distal	57202	37407231	37443645	+	ZNF568_dup1
chr19	46149466	46149467	MACS_peak_349	170.52	5_TSS	-692	46148775	46112658	-	EML2_dup3
chr19	49256221	49256222	MACS_peak_350	274.41	5_TSS	695	49256917	49251268	-	FUT1_dup1
chr19	55690045	55690046	MACS_peak_351	57.46	5_TSS	765	55690811	55684464	-	SYT5
chr19	55690220	55690221	MACS_peak_352	407.82	5_TSS	590	55690811	55684464	-	SYT5
chr19	55727889	55727890	MACS_peak_353	762.39	5_Proximal	-7016	55720874	55692615	-	PTPRH_dup1
chr19	55770665	55770666	MACS_peak_354	336.85	5_TSS	-628	55770038	55741147	-	PPP6R1
chr2	4145872	4145873	MACS_peak_355	54.05	Intergenic	124122	4021751	4022870	+	LOC105373394
chr2	6768858	6768859	MACS_peak_356	53.48	Intragenic	5060	6773919	6766241	-	LINC01246
chr2	7829038	7829039	MACS_peak_357	55.92	Intergenic	210747	8039786	8026898	-	LOC101929551
chr2	9563602	9563603	MACS_peak_358	54.43	5_TSS	-63	9563666	9613239	+	CPSF3_dup1
chr2	11606402	11606403	MACS_peak_359	572.07	5_TSS	-100	11606303	11584501	-	E2F6_dup1
chr2	12468986	12468987	MACS_peak_360	52.32	Intergenic	129731	12339256	12339327	+	MIR3681
chr2	13719583	13719584	MACS_peak_361	50.72	Intergenic	-572446	13147138	13106908	-	LOC100506474
chr2	17484952	17484953	MACS_peak_362	81.75	Intergenic	214753	17699706	17691986	-	RAD51AP2_dup1
chr2	21968169	21968170	MACS_peak_363	60.68	5_Distal	-34646	21933524	21910306	-	LINC01822
chr2	32008710	32008711	MACS_peak_364	76.27	3_Distal	227022	32235733	32092879	-	MEMO1_dup1
chr2	32236082	32236083	MACS_peak_365	229.32	5_TSS	38	32236121	32092879	-	MEMO1_dup3
chr2	33870192	33870193	MACS_peak_366	53.3	5_Distal	-45764	33824429	33808728	-	FAM98A_dup1
chr2	35315553	35315554	MACS_peak_367	50.26	Intergenic	-380917	35696471	35696552	+	MIR548AD
chr2	37899407	37899408	MACS_peak_368	107.69	5_TSS	-66	37899342	37869025	-	CDC42EP3_dup1
chr2	37899956	37899957	MACS_peak_369	181.1	5_TSS	-615	37899342	37869025	-	CDC42EP3_dup1
chr2	43273955	43273956	MACS_peak_370	56.92	5_Proximal	-7274	43266682	43254992	-	LINC01819
chr2	46870221	46870222	MACS_peak_371	137.98	3_Distal	25911	46844311	46857315	+	CRIPT
chr2	47338196	47338197	MACS_peak_372	61.05	3_Distal	44320	47382517	47355587	-	STPG4_dup1
chr2	49650573	49650574	MACS_peak_373	51.85	Intergenic	-268908	49381666	49189296	-	FSHR_dup1
chr2	53614868	53614869	MACS_peak_374	65.18	Intergenic	-380051	53994920	54002333	+	CHAC2_dup1
chr2	53821678	53821679	MACS_peak_375	55.68	3_Distal	192306	54013985	53897117	-	ASB3_dup1
chr2	56450717	56450718	MACS_peak_376	52.08	5_Distal	-37813	56412905	56400669	-	LOC100129434
chr2	56704504	56704505	MACS_peak_377	55.47	3_Distal	293247	56411258	56613309	+	CCDC85A_dup1
chr2	57859103	57859104	MACS_peak_378	50.54	Intergenic	-275682	58134786	58387055	+	VRK2_dup1
chr2	59056628	59056629	MACS_peak_379	57.45	Intragenic	308741	58747888	59290901	+	LINC01122
chr2	65537073	65537074	MACS_peak_380	50.4	3_TTS	56857	65593931	65537985	-	SPRED2
chr2	65659962	65659963	MACS_peak_381	162.42	5_TSS	-307	65659656	65537985	-	SPRED2_dup1
chr2	65662944	65662945	MACS_peak_382	120.83	5_TSS	-3289	65659656	65537985	-	SPRED2_dup1
chr2	67180829	67180830	MACS_peak_383	58.39	5_Distal	-31208	67149622	67148643	-	LINC01628
chr2	68496397	68496398	MACS_peak_384	64.76	5_Distal	-16747	68479651	68405989	-	PPP3R1
chr2	70550611	70550612	MACS_peak_385	57.65	5_Distal	-21435	70529177	70523108	-	FAM136A_dup1
chr2	73143394	73143395	MACS_peak_386	215.05	5_TSS	-1209	73144604	73162020	+	EMX1
chr2	73144348	73144349	MACS_peak_387	56.36	5_TSS	-255	73144604	73162020	+	EMX1
chr2	73144511	73144512	MACS_peak_388	312.25	5_TSS	-92	73144604	73162020	+	EMX1
chr2	79911696	79911697	MACS_peak_389	54.11	5_Distal	-35212	79876485	79876420	-	MIR4264
chr2	80195986	80195987	MACS_peak_390	52.08	Intergenic	-102278	80093709	80093621	-	MIR8080
chr2	82560323	82560324	MACS_peak_391	53.57	Intergenic	-523603	83083927	83084893	+	DHFRP3
chr2	83182473	83182474	MACS_peak_392	59.4	3_Distal	98547	83083927	83084893	+	DHFRP3
chr2	86657553	86657554	MACS_peak_393	53.4	5_Distal	-10717	86668271	86719839	+	KDM3A
chr2	87897794	87897795	MACS_peak_394	79.47	5_Distal	-31484	87929279	87929352	+	MIR4435-2
chr2	95480401	95480402	MACS_peak_395	64.94	Intragenic	42418	95522820	95426673	-	ANKRD20A8P
chr2	96625211	96625212	MACS_peak_396	61.14	3_Distal	75781	96700993	96687694	-	GPAT2_dup1
chr2	96917630	96917631	MACS_peak_397	699.91	Intragenic	14120	96931751	96915946	-	TMEM127_dup1
chr2	97304154	97304155	MACS_peak_398	422.7	5_TSS	-39	97304116	97258892	-	KANSL3_dup10
chr2	97304365	97304366	MACS_peak_399	58.41	5_TSS	-250	97304116	97258892	-	KANSL3_dup10
chr2	99030779	99030780	MACS_peak_400	93.94	5_Distal	-30541	99061321	99207496	+	INPP4A_dup1
chr2	99052258	99052259	MACS_peak_401	61.31	5_Proximal	-9062	99061321	99207496	+	INPP4A_dup1
chr2	99690207	99690208	MACS_peak_402	56.08	3_Distal	81221	99771429	99764727	-	TSGA10_dup6
chr2	99822081	99822082	MACS_peak_403	178.88	3_Proximal	24540	99797542	99816020	+	MRPL30_dup1
chr2	110884036	110884037	MACS_peak_404	57.79	5_Proximal	-9894	110874143	110841447	-	MALL
chr2	112463340	112463341	MACS_peak_405	56.91	3_Distal	65370	112528711	112528638	-	MIR4771-1_dup1
chr2	114647402	114647403	MACS_peak_406	115.34	5_TSS	-108	114647511	114719129	+	ACTR3_dup1
chr2	115479328	115479329	MACS_peak_407	54.72	Intergenic	111796	115591125	115585918	-	DPP10-AS3
chr2	116506198	116506199	MACS_peak_408	56.82	Intragenic	404806	116101393	116603328	+	DPP10_dup14
chr2	117073506	117073507	MACS_peak_409	77.79	Intergenic	972114	116101393	116603328	+	DPP10_dup14
chr2	120550764	120550765	MACS_peak_410	52.67	Intragenic	33558	120517207	120742474	+	PTPN4
chr2	124267947	124267948	MACS_peak_411	58.62	Intergenic	-514916	124782864	125672954	+	CNTNAP5
chr2	125419842	125419843	MACS_peak_412	57.95	Intragenic	636979	124782864	125672954	+	CNTNAP5
chr2	133513551	133513552	MACS_peak_413	56.87	5_Distal	-84400	133429152	133400853	-	LYPD1_dup2
chr2	136256336	136256337	MACS_peak_414	55.27	Intragenic	31963	136288300	135954539	-	ZRANB3_dup1
chr2	139183822	139183823	MACS_peak_415	52.67	5_Distal	-75527	139259350	139330805	+	SPOPL
chr2	140971327	140971328	MACS_peak_416	55.1	3_Distal	1917942	142889270	140988996	-	LRP1B
chr2	145410165	145410166	MACS_peak_417	55.88	5_Distal	-15368	145425534	145834291	+	TEX41
chr2	147029188	147029189	MACS_peak_418	53.66	Intergenic	-315436	147344625	147348558	+	PABPC1P2
chr2	147727468	147727469	MACS_peak_419	55.79	Intergenic	382844	147344625	147348558	+	PABPC1P2
chr2	147880368	147880369	MACS_peak_420	72.3	Intergenic	535744	147344625	147348558	+	PABPC1P2
chr2	156003783	156003784	MACS_peak_421	59.39	Intergenic	448691	155555093	155714864	+	KCNJ3_dup1
chr2	157500541	157500542	MACS_peak_422	50.54	3_Distal	207642	157292900	157442915	+	GPD2_dup1
chr2	157651711	157651712	MACS_peak_423	51.88	Intergenic	358812	157292900	157442915	+	GPD2_dup1
chr2	160432054	160432055	MACS_peak_424	61.39	5_Distal	-39750	160471805	160474553	+	LOC643072_dup1
chr2	162430402	162430403	MACS_peak_425	52.6	5_Distal	-65990	162364413	162355578	-	AHCTF1P1
chr2	162815011	162815012	MACS_peak_426	50.35	3_Distal	116040	162931052	162848755	-	DPP4
chr2	166826541	166826542	MACS_peak_427	57.17	3_Distal	103607	166930149	166845670	-	SCN1A_dup1
chr2	167959158	167959159	MACS_peak_428	53.8	3_Distal	38306	167997465	167979319	-	XIRP2-AS1
chr2	173390471	173390472	MACS_peak_429	69.09	5_Distal	-29629	173420101	173490351	+	PDK1
chr2	178431327	178431328	MACS_peak_430	51.7	5_Distal	-13804	178417524	178414881	-	TTC30B
chr2	179717473	179717474	MACS_peak_431	50.28	5_Distal	-45324	179672150	179390717	-	TTN_dup1
chr2	181265384	181265385	MACS_peak_432	55.09	Intergenic	-393605	180871780	180809604	-	CWC22
chr2	182801848	182801849	MACS_peak_433	51.28	5_Distal	-17119	182818968	182982483	+	PPP1R1C
chr2	183015127	183015128	MACS_peak_434	52.67	3_Distal	91662	183106790	183032614	-	PDE1A_dup2
chr2	185653821	185653822	MACS_peak_435	57.44	Intragenic	190729	185463093	185804214	+	ZNF804A
chr2	192372159	192372160	MACS_peak_436	57.88	3_Distal	262158	192110002	192290115	+	MYO1B_dup1
chr2	198944912	198944913	MACS_peak_437	54.9	Intragenic	275487	198669426	199014608	+	PLCL1
chr2	202663204	202663205	MACS_peak_438	65.62	5_Distal	-17310	202645895	202624181	-	ALS2_dup1
chr2	204046307	204046308	MACS_peak_439	73.34	5_Distal	-56856	204103164	204170563	+	CYP20A1
chr2	209897398	209897399	MACS_peak_440	51.45	Intergenic	-391372	210288771	210598834	+	MAP2
chr2	210646875	210646876	MACS_peak_441	70.39	3_Distal	358105	210288771	210598834	+	MAP2
chr2	221262395	221262396	MACS_peak_442	51.06	Intergenic	-491110	220771286	220771223	-	MIR4268
chr2	222002837	222002838	MACS_peak_443	50.63	Intergenic	434240	222437078	222282747	-	EPHA4_dup1
chr2	222125158	222125159	MACS_peak_444	71.52	Intergenic	311919	222437078	222282747	-	EPHA4_dup1
chr2	223263084	223263085	MACS_peak_445	60.71	5_Distal	-25686	223288771	223427341	+	SGPP2
chr2	226715425	226715426	MACS_peak_446	57.5	Intergenic	-292084	227007510	227044778	+	LOC646736
chr2	227201826	227201827	MACS_peak_447	61.68	Intergenic	194317	227007510	227044778	+	LOC646736
chr2	231921283	231921284	MACS_peak_448	100.06	5_TSS	-294	231921578	232037540	+	PSMD1_dup1
chr2	232527003	232527004	MACS_peak_449	271.44	5_Distal	-51020	232578024	232578105	+	MIR1244-1
chr2	232571668	232571669	MACS_peak_450	54.72	5_Proximal	-6355	232578024	232578105	+	MIR1244-1
chr2	236195960	236195961	MACS_peak_451	50.49	Intergenic	-218434	236414395	236416210	+	AGAP1-IT1
chr2	236575330	236575331	MACS_peak_452	156.63	Intergenic	160936	236414395	236416210	+	AGAP1-IT1
chr2	236575507	236575508	MACS_peak_453	55.92	Intergenic	161113	236414395	236416210	+	AGAP1-IT1
chr2	236578076	236578077	MACS_peak_454	71.37	Intergenic	163682	236414395	236416210	+	AGAP1-IT1
chr2	240937021	240937022	MACS_peak_455	52.32	Intragenic	27797	240964819	240831868	-	NDUFA10
chr20	1758002	1758003	MACS_peak_456	53.49	Intragenic	2389	1760392	1754011	-	LOC100289473
chr20	7617706	7617707	MACS_peak_457	53.63	Intergenic	265452	7352255	7352339	+	MIR8062
chr20	8540798	8540799	MACS_peak_458	51.85	Intergenic	311448	8229351	8230388	+	PLCB1-IT1
chr20	10414932	10414933	MACS_peak_459	407.64	5_TSS	-46	10414887	10385428	-	MKKS_dup1
chr20	10415259	10415260	MACS_peak_460	380.01	5_TSS	-373	10414887	10385428	-	MKKS_dup1
chr20	16017164	16017165	MACS_peak_461	52.67	5_Distal	-50638	15966527	15872979	-	LOC613266_dup1
chr20	16554174	16554175	MACS_peak_462	157.03	5_TSS	-96	16554079	16252749	-	KIF16B_dup1
chr20	16555572	16555573	MACS_peak_463	188.69	5_TSS	-1494	16554079	16252749	-	KIF16B_dup1
chr20	16788549	16788550	MACS_peak_464	50.34	3_Distal	59552	16728998	16732809	+	OTOR
chr20	20553500	20553501	MACS_peak_465	50.65	Intragenic	139765	20693266	20370272	-	RALGAPA2
chr20	22431983	22431984	MACS_peak_466	57.59	5_Distal	-30703	22401281	22380971	-	LOC284788
chr20	22495187	22495188	MACS_peak_467	52.22	3_Distal	64092	22559280	22541192	-	LINC00261
chr20	23742317	23742318	MACS_peak_468	58.39	5_Distal	-10744	23731574	23728190	-	CST1
chr20	25086933	25086934	MACS_peak_469	57.17	5_Distal	-23919	25063015	25051521	-	VSX1_dup1
chr20	26223129	26223130	MACS_peak_470	60.71	5_Distal	-34216	26188914	26188822	-	MIR663A
chr20	29430938	29430939	MACS_peak_471	51.25	3_Distal	90274	29521213	29513584	-	LINC01597
chr20	36771962	36771963	MACS_peak_472	62.15	Intragenic	21868	36793831	36755789	-	TGM2_dup1
chr20	38368612	38368613	MACS_peak_473	54.96	Intergenic	-264490	38633103	38637171	+	LINC01370_dup1
chr20	46907456	46907457	MACS_peak_474	54.72	5_Distal	-81197	46988654	46999381	+	LINC00494
chr20	48552782	48552783	MACS_peak_475	178.55	5_TSS	-131	48552914	48570422	+	RNF114
chr20	49032372	49032373	MACS_peak_476	115.03	5_Distal	-94485	49126858	49201300	+	PTPN1_dup1
chr20	50994589	50994590	MACS_peak_477	60.95	Intergenic	-186066	50808524	50700550	-	ZFP64_dup1
chr20	57745139	57745140	MACS_peak_478	55.54	5_Distal	-20935	57766075	57834167	+	ZNF831
chr20	62313742	62313743	MACS_peak_479	142.46	5_Distal	-14261	62328004	62330051	+	TNFRSF6B
chr21	10429844	10429845	MACS_peak_480	50.55	Intergenic	-461251	9968594	9907189	-	TEKT4P2_dup1
chr21	10643406	10643407	MACS_peak_481	51.38	Intergenic	347536	10990943	10906187	-	TPTE_dup1
chr21	10750186	10750187	MACS_peak_482	51.28	Intergenic	240756	10990943	10906187	-	TPTE_dup1
chr21	10818660	10818661	MACS_peak_483	64.84	3_Distal	172282	10990943	10906187	-	TPTE_dup1
chr21	25985109	25985110	MACS_peak_484	55.44	3_Distal	184056	25801054	25920256	+	LINC01684_dup2
chr21	31305356	31305357	MACS_peak_485	70.87	Intragenic	6925	31312282	30909254	-	GRIK1_dup3
chr21	32198926	32198927	MACS_peak_486	55.2	3_TTS	3124	32202051	32201358	-	KRTAP7-1
chr21	34144174	34144175	MACS_peak_487	71.37	5_TSS	-6	34144169	34106210	-	PAXBP1_dup1
chr21	34144445	34144446	MACS_peak_488	275.56	5_TSS	35	34144411	34170016	+	C21orf62-AS1_dup1
chr21	34293669	34293670	MACS_peak_489	54.72	5_Distal	-37526	34331196	34332872	+	LOC102724502
chr21	40037800	40037801	MACS_peak_490	57.71	5_TSS	-4097	40033704	39739183	-	ERG
chr21	43299211	43299212	MACS_peak_491	57.17	5_TSS	379	43299591	43218385	-	PRDM15_dup1
chr21	45145909	45145910	MACS_peak_492	63.39	3_Distal	66478	45079432	45115960	+	RRP1B
chr22	29426922	29426923	MACS_peak_493	146.07	5_TSS	541	29427464	29420987	-	ZNRF3-AS1
chr22	29427189	29427190	MACS_peak_494	57.17	5_TSS	274	29427464	29420987	-	ZNRF3-AS1
chr22	29427351	29427352	MACS_peak_495	96.04	5_TSS	112	29427464	29420987	-	ZNRF3-AS1
chr22	37724952	37724953	MACS_peak_496	269.85	3_Distal	25926	37750879	37748231	-	LOC100506271
chr22	38506328	38506329	MACS_peak_497	84.6	5_TSS	347	38506676	38480896	-	BAIAP2L2
chr22	38852156	38852157	MACS_peak_498	141.23	5_Distal	-11910	38864067	38877637	+	KDELR3
chr22	38857682	38857683	MACS_peak_499	92.04	5_Proximal	-6384	38864067	38879452	+	KDELR3_dup1
chr22	39925309	39925310	MACS_peak_500	352.41	3_TTS	3550	39928860	39925098	-	RPS19BP1_dup1
chr22	42840266	42840267	MACS_peak_501	113.98	5_Distal	-11866	42828401	42776414	-	NFAM1_dup1
chr22	46192035	46192036	MACS_peak_502	104.99	3_Distal	35632	46156404	46156478	+	MIR4762
chr3	974724	974725	MACS_peak_503	54.25	3_Distal	340937	633788	887698	+	LINC01266
chr3	12078529	12078530	MACS_peak_504	59.83	Intragenic	32696	12045834	12227232	+	SYN2_dup1
chr3	26740222	26740223	MACS_peak_505	54.7	Intragenic	4175	26736048	26752265	+	LRRC3B_dup4
chr3	36620130	36620131	MACS_peak_506	106.51	3_Distal	198152	36421979	36589498	+	STAC_dup1
chr3	49170524	49170525	MACS_peak_507	288.79	5_TSS	74	49170599	49158547	-	LAMB2
chr3	49171190	49171191	MACS_peak_508	401.52	5_TSS	-592	49170599	49158547	-	LAMB2
chr3	57029645	57029646	MACS_peak_509	142.64	3_Distal	55578	56974068	56994880	+	ARHGEF3-AS1
chr3	57789516	57789517	MACS_peak_510	463.78	Intragenic	46534	57742983	57915741	+	SLMAP_dup1
chr3	58512622	58512623	MACS_peak_511	259.45	Intragenic	10306	58522929	58490863	-	ACOX2
chr3	62538368	62538369	MACS_peak_512	57.34	Intragenic	322695	62861064	62384021	-	CADPS_dup1
chr3	96433614	96433615	MACS_peak_513	54.22	5_Distal	-99810	96533425	97467786	+	EPHA6_dup1
chr3	105087080	105087081	MACS_peak_514	52.67	Intragenic	1524	105085557	105295757	+	ALCAM_dup1
chr3	111026758	111026759	MACS_peak_515	68.29	Intergenic	-234167	111260926	111325925	+	CD96_dup1
chr3	111546827	111546828	MACS_peak_516	60.97	5_Distal	-31199	111578027	111695364	+	PHLDB2_dup1
chr3	114819230	114819231	MACS_peak_517	52.15	5_TSS	-39	114819270	114821908	+	ZBTB20-AS4
chr3	115954767	115954768	MACS_peak_518	54.22	Intergenic	-124103	116078871	116088932	+	LSAMP-AS1
chr3	117527615	117527616	MACS_peak_519	51.85	Intergenic	-832999	118360615	118363004	+	LOC101926968
chr3	119294398	119294399	MACS_peak_520	74.93	5_TSS	-3881	119298280	119308792	+	ADPRH_dup1
chr3	127467097	127467098	MACS_peak_521	118.64	Intragenic	74627	127541725	127407905	-	MGLL_dup1
chr3	130127160	130127161	MACS_peak_522	73.17	Intragenic	62802	130064359	130203690	+	COL6A5_dup1
chr3	130579513	130579514	MACS_peak_523	58.74	Intragenic	10145	130569369	130735555	+	ATP2C1_dup1
chr3	135672904	135672905	MACS_peak_524	56.17	5_Distal	-11610	135684515	135866752	+	PPP2R3A_dup1
chr3	138328271	138328272	MACS_peak_525	252.3	5_TSS	353	138327919	138352213	+	FAIM_dup3
chr3	138328699	138328700	MACS_peak_526	51.72	5_TSS	781	138327919	138352213	+	FAIM_dup3
chr3	142315169	142315170	MACS_peak_527	90.65	5_TSS	-59	142315229	142432505	+	PLS1
chr3	143851951	143851952	MACS_peak_528	58.21	Intergenic	159785	143692167	143711210	+	C3orf58_dup1
chr3	144294405	144294406	MACS_peak_529	54.49	Intergenic	602239	143692167	143711210	+	C3orf58_dup1
chr3	148328776	148328777	MACS_peak_530	59.71	5_Distal	-86881	148415658	148460790	+	AGTR1_dup1
chr3	152879306	152879307	MACS_peak_531	101.58	5_TSS	-694	152880001	152888413	+	RAP2B
chr3	155462942	155462943	MACS_peak_532	184.23	5_TSS	-65	155462878	155197671	-	PLCH1_dup4
chr3	155463791	155463792	MACS_peak_533	101.17	5_TSS	-914	155462878	155197671	-	PLCH1_dup4
chr3	160701991	160701992	MACS_peak_534	70.45	Intragenic	113606	160588386	160796695	+	PPM1L_dup3
chr3	161156458	161156459	MACS_peak_535	60.51	Intragenic	12244	161144215	161166030	+	LINC02067
chr3	163596445	163596446	MACS_peak_536	59.01	Intergenic	292898	163889344	163889259	-	MIR1263
chr3	164914687	164914688	MACS_peak_537	121.84	5_TSS	-48	164914640	164904508	-	SLITRK3
chr3	167053267	167053268	MACS_peak_538	57.69	5_Distal	-57316	167110584	167126307	+	LINC01327
chr3	167929495	167929496	MACS_peak_539	65.69	5_Distal	-37814	167967310	168548374	+	EGFEM1P
chr3	169381318	169381319	MACS_peak_540	64.31	5_TSS	244	169381563	168801287	-	MECOM_dup3
chr3	177464955	177464956	MACS_peak_541	59.01	5_Distal	-69697	177534653	177617012	+	LINC02015
chr3	190091468	190091469	MACS_peak_542	59.83	5_Distal	-14192	190105661	190129932	+	CLDN16
chr3	190621256	190621257	MACS_peak_543	53.3	3_Distal	25538	190595719	190595839	+	SNAR-I
chr3	193462120	193462121	MACS_peak_544	95.92	3_Distal	151188	193310933	193415600	+	OPA1_dup1
chr3	197845680	197845681	MACS_peak_545	60.39	5_Distal	-38139	197807542	197784404	-	ANKRD18DP
chr4	1874171	1874172	MACS_peak_546	99.8	5_Distal	-16198	1857974	1813206	-	LETM1
chr4	2813928	2813929	MACS_peak_547	146.94	5_TSS	-17	2813946	2842823	+	SH3BP2_dup1
chr4	4220939	4220940	MACS_peak_548	53.84	3_Distal	29029	4249969	4237269	-	TMEM128_dup1
chr4	11998573	11998574	MACS_peak_549	64.93	Intergenic	-226501	12225075	12252909	+	LOC101929019
chr4	13953111	13953112	MACS_peak_550	55.44	3_Distal	296309	13656803	13932852	+	LINC01182
chr4	15897434	15897435	MACS_peak_551	58.07	3_Distal	42928	15940363	15937193	-	FGFBP1
chr4	18174501	18174502	MACS_peak_552	55.92	Intergenic	-151004	18023498	17842822	-	LCORL_dup1
chr4	18829005	18829006	MACS_peak_553	54.51	Intergenic	-805508	18023498	17842822	-	LCORL_dup1
chr4	19257440	19257441	MACS_peak_554	50.57	Intergenic	-1136371	20393812	20396479	+	SLIT2-IT1
chr4	21305818	21305819	MACS_peak_555	52.07	5_TSS	-290	21305529	20730239	-	KCNIP4
chr4	25419919	25419920	MACS_peak_556	52.34	3_TTS	41072	25378848	25420120	+	ANAPC4_dup1
chr4	25693380	25693381	MACS_peak_557	79.56	3_Distal	35295	25658086	25680368	+	SLC34A2_dup2
chr4	26321432	26321433	MACS_peak_558	302.07	5_TSS	101	26321332	26436752	+	RBPJ_dup1
chr4	26322357	26322358	MACS_peak_559	311.2	5_TSS	-71	26322429	26436752	+	RBPJ_dup2
chr4	27546611	27546612	MACS_peak_560	52.67	Intergenic	327511	27219101	27283847	+	LOC101929199
chr4	31850222	31850223	MACS_peak_561	51.33	Intergenic	-148778	31999001	32157028	+	LOC102723828
chr4	32074543	32074544	MACS_peak_562	59.14	5_Distal	-50500	32024044	32007475	-	LOC105377651
chr4	32573134	32573135	MACS_peak_563	77.84	Intergenic	220475	32352660	32354842	+	LOC101927363
chr4	32647476	32647477	MACS_peak_564	118.63	Intergenic	294817	32352660	32354842	+	LOC101927363
chr4	34024783	34024784	MACS_peak_565	52.24	Intragenic	16731	34041515	33897961	-	LOC101928622
chr4	38062562	38062563	MACS_peak_566	77.28	5_Distal	-49239	38111802	38140796	+	TBC1D1_dup2
chr4	38340742	38340743	MACS_peak_567	98.29	3_Distal	184058	38524801	38422283	-	LINC01258
chr4	40751898	40751899	MACS_peak_568	82.64	5_TSS	-15	40751914	40813199	+	NSUN7_dup1
chr4	41216643	41216644	MACS_peak_569	239.44	5_TSS	-9	41216635	40812044	-	APBB2_dup1
chr4	43477027	43477028	MACS_peak_570	50.93	Intergenic	-541850	44018878	44024078	+	LVCAT1
chr4	43904778	43904779	MACS_peak_571	51.12	Intergenic	-114099	44018878	44024078	+	LVCAT1
chr4	46618549	46618550	MACS_peak_572	58.99	Intergenic	-226465	46392085	46245565	-	GABRA2_dup1
chr4	48629918	48629919	MACS_peak_573	51.87	Intragenic	152397	48782316	48499380	-	FRYL
chr4	52871126	52871127	MACS_peak_574	52.81	Intragenic	12659	52883786	52859808	-	LRRC66
chr4	55316350	55316351	MACS_peak_575	92.92	Intergenic	156947	55473298	55469378	-	LOC339978
chr4	61777726	61777727	MACS_peak_576	52.67	5_Distal	-10610	61788337	61788402	+	MIR548AG1
chr4	65498007	65498008	MACS_peak_577	50.49	Intergenic	-222830	65275178	65144177	-	TECRL
chr4	66569127	66569128	MACS_peak_578	53.89	5_Distal	-32915	66536213	66185281	-	EPHA5_dup1
chr4	67323358	67323359	MACS_peak_579	54.46	Intergenic	180817	67142542	67142646	+	MIR1269A
chr4	70476560	70476561	MACS_peak_580	50.18	Intragenic	28799	70505360	70454135	-	UGT2A2_dup1
chr4	73434033	73434034	MACS_peak_581	58.89	5_TSS	482	73434516	73146686	-	ADAMTS3
chr4	74827228	74827229	MACS_peak_582	51.76	3_Distal	20612	74847841	74846542	-	PF4
chr4	75178057	75178058	MACS_peak_583	61.68	Intragenic	3871	75174187	75182520	+	EPGN_dup1
chr4	77359414	77359415	MACS_peak_584	56.75	5_Distal	-30957	77328458	77234192	-	CCDC158
chr4	82252353	82252354	MACS_peak_585	53.25	3_Distal	140728	82393082	82347547	-	RASGEF1B_dup1
chr4	88215246	88215247	MACS_peak_586	62.15	3_Proximal	6488	88221735	88221647	-	MIR5705
chr4	91949740	91949741	MACS_peak_587	50.44	Intergenic	793559	91156182	91703154	+	CCSER1_dup1
chr4	92888594	92888595	MACS_peak_588	51.98	Intergenic	309858	93198453	93183649	-	LNCPRESS2
chr4	97388404	97388405	MACS_peak_589	60.29	Intergenic	627166	96761239	96762625	+	PDHA2
chr4	103419420	103419421	MACS_peak_590	54.36	5_TSS	-3065	103422486	103538459	+	NFKB1_dup1
chr4	104211344	104211345	MACS_peak_591	50.12	5_Distal	-91779	104119566	104026963	-	CENPE_dup1
chr4	104625770	104625771	MACS_peak_592	51.61	Intragenic	15202	104640973	104510625	-	TACR3
chr4	105877658	105877659	MACS_peak_593	52.92	Intergenic	-189373	106067032	106163928	+	TET2
chr4	108142772	108142773	MACS_peak_594	54.82	Intergenic	-185320	107957453	107842959	-	DKK2
chr4	112981764	112981765	MACS_peak_595	51.89	5_Distal	-84788	113066553	113110237	+	C4orf32
chr4	113093801	113093802	MACS_peak_596	55.73	Intragenic	27249	113066553	113110237	+	C4orf32
chr4	114702311	114702312	MACS_peak_597	57.17	5_Distal	-19229	114683083	114372188	-	CAMK2D_dup10
chr4	118135194	118135195	MACS_peak_598	50.44	Intergenic	-128459	118006736	118004710	-	TRAM1L1
chr4	118302637	118302638	MACS_peak_599	52.62	5_Distal	-46916	118349554	118610258	+	LINC01378
chr4	118615479	118615480	MACS_peak_600	52.67	3_Proximal	265926	118349554	118610258	+	LINC01378
chr4	119811834	119811835	MACS_peak_601	58.78	Intragenic	1839	119809996	119982402	+	SYNPO2_dup1
chr4	121310420	121310421	MACS_peak_602	56.14	Intergenic	-322408	120988013	120980579	-	MAD2L1
chr4	121869781	121869782	MACS_peak_603	234.97	5_Distal	-25761	121844021	121613068	-	PRDM5_dup1
chr4	123965075	123965076	MACS_peak_604	51.44	3_Distal	120851	123844225	123949651	+	SPATA5_dup1
chr4	124171489	124171490	MACS_peak_605	53.67	Intragenic	327265	123844225	124240604	+	SPATA5_dup2
chr4	128328767	128328768	MACS_peak_606	222.33	Intergenic	-225319	128554087	128637934	+	INTU
chr4	129186872	129186873	MACS_peak_607	111.35	3_TTS	23111	129209984	129190392	-	PGRMC2
chr4	129474157	129474158	MACS_peak_608	272.51	3_Distal	124987	129349171	129440551	+	LOC100507487
chr4	141075436	141075437	MACS_peak_609	106.9	5_TSS	-204	141075233	140637546	-	MAML3
chr4	141170708	141170709	MACS_peak_610	75.23	5_Proximal	-7731	141178440	141303710	+	SCOC
chr4	143536722	143536723	MACS_peak_611	51.44	Intragenic	230965	143767688	142944313	-	INPP4B_dup1
chr4	146860085	146860086	MACS_peak_612	95.8	5_TSS	26	146860112	146678779	-	ZNF827_dup1
chr4	148706567	148706568	MACS_peak_613	62.97	3_TTS	2822	148703746	148703819	+	MIR4799
chr4	150868508	150868509	MACS_peak_614	58.62	Intergenic	-130917	150999426	151178608	+	DCLK2_dup1
chr4	155795245	155795246	MACS_peak_615	59.64	3_Distal	92589	155702657	155749965	+	RBM46_dup2
chr4	155795414	155795415	MACS_peak_616	77.71	3_Distal	92758	155702657	155749965	+	RBM46_dup2
chr4	159028585	159028586	MACS_peak_617	51.47	3_Distal	65132	159093718	159045732	-	FAM198B_dup1
chr4	161571665	161571666	MACS_peak_618	65.69	Intergenic	-1372219	162943885	162968702	+	LOC101928052
chr4	161964143	161964144	MACS_peak_619	69.09	Intergenic	-979741	162943885	162968702	+	LOC101928052
chr4	166558958	166558959	MACS_peak_620	51.99	5_Distal	-46832	166605791	166683930	+	LINC01179
chr4	167316499	167316500	MACS_peak_621	65.47	Intergenic	522090	166794410	166952111	+	TLL1_dup1
chr4	170276758	170276759	MACS_peak_622	52.67	5_Distal	-84510	170192249	170015407	-	SH3RF1
chr4	170948517	170948518	MACS_peak_623	232.21	5_TSS	-937	170947581	170907748	-	MFAP3L_dup1
chr4	173657418	173657419	MACS_peak_624	81.37	5_Proximal	-9390	173648029	173555836	-	LOC101928314_dup1
chr4	173891554	173891555	MACS_peak_625	75.23	Intragenic	1156980	172734575	173961558	+	GALNTL6
chr4	176048291	176048292	MACS_peak_626	115.34	Intergenic	208783	175839509	175899331	+	ADAM29_dup1
chr4	176048505	176048506	MACS_peak_627	96.04	Intergenic	208997	175839509	175899331	+	ADAM29_dup1
chr4	180822763	180822764	MACS_peak_628	56.67	Intergenic	1257538	182080302	181985243	-	LINC00290
chr4	182890632	182890633	MACS_peak_629	51.56	Intergenic	175035	183065668	183059813	-	LOC90768_dup1
chr4	183032541	183032542	MACS_peak_630	57.03	3_Distal	33126	183065668	183059813	-	LOC90768_dup1
chr4	185655388	185655389	MACS_peak_631	895.11	5_TSS	-103	185655286	185615219	-	CENPU_dup1
chr4	187718006	187718007	MACS_peak_632	67.74	5_Distal	-73020	187644987	187508937	-	FAT1
chr4	190914151	190914152	MACS_peak_633	65.53	3_Distal	52178	190861974	190884359	+	FRG1
chr5	4742914	4742915	MACS_peak_634	50.98	5_Distal	-30679	4773594	4774978	+	LINC02114
chr5	11913924	11913925	MACS_peak_635	51.38	5_Proximal	-9770	11904155	10971954	-	CTNND2_dup2
chr5	12996875	12996876	MACS_peak_636	52.76	Intergenic	328905	12667971	12668022	+	MIR4454_dup1
chr5	13024378	13024379	MACS_peak_637	52.27	Intergenic	356408	12667971	12668022	+	MIR4454_dup1
chr5	13266208	13266209	MACS_peak_638	59.09	Intergenic	598238	12667971	12668022	+	MIR4454_dup1
chr5	14157660	14157661	MACS_peak_639	66.21	Intragenic	13850	14143811	14510313	+	TRIO_dup1
chr5	18837704	18837705	MACS_peak_640	51.63	Intergenic	1030322	17807383	17930598	+	LINC02223_dup1
chr5	19135921	19135922	MACS_peak_641	55.9	Intergenic	750459	19886381	19473155	-	CDH18_dup2
chr5	19470101	19470102	MACS_peak_642	56.29	3_TTS	416279	19886381	19473155	-	CDH18_dup2
chr5	21251724	21251725	MACS_peak_643	60.71	Intergenic	-207864	21459589	21497305	+	GUSBP1_dup1
chr5	21459495	21459496	MACS_peak_644	93.04	5_TSS	-93	21459589	21497305	+	GUSBP1_dup1
chr5	24637488	24637489	MACS_peak_645	52.67	5_Distal	-43881	24593608	24487209	-	CDH10_dup1
chr5	35303341	35303342	MACS_peak_646	53.82	5_Distal	-72651	35230691	35055802	-	PRLR_dup4
chr5	36665846	36665847	MACS_peak_647	52.49	Intragenic	59390	36606457	36688436	+	SLC1A3_dup1
chr5	37216883	37216884	MACS_peak_648	55.02	5_Distal	-32264	37249148	37250748	+	LOC105374727
chr5	37379299	37379300	MACS_peak_649	165.25	5_Proximal	-8072	37371228	37291735	-	NUP155_dup1
chr5	38607587	38607588	MACS_peak_650	69.51	5_Distal	-12081	38595507	38475065	-	LIFR
chr5	38832123	38832124	MACS_peak_651	470.19	5_Distal	-13836	38845960	38886841	+	OSMR_dup1
chr5	41011556	41011557	MACS_peak_652	60.71	Intragenic	59887	41071444	40998122	-	MROH2B
chr5	42175346	42175347	MACS_peak_653	59.28	5_TSS	100	42175447	42155935	-	LOC101926960_dup1
chr5	44395068	44395069	MACS_peak_654	57.55	Intragenic	6235	44388834	44414091	+	FGF10-AS1
chr5	49875970	49875971	MACS_peak_655	60.11	5_Distal	-85762	49961733	50142356	+	PARP8
chr5	58423664	58423665	MACS_peak_656	134.1	5_Distal	-88326	58335339	58264866	-	PDE4D_dup5
chr5	59477913	59477914	MACS_peak_657	60.65	Intergenic	-305845	59783759	59787092	+	PART1_dup2
chr5	64967105	64967106	MACS_peak_658	64.18	3_Proximal	46548	64920558	64961954	+	TRAPPC13_dup1
chr5	65181913	65181914	MACS_peak_659	56.27	5_Distal	-40468	65222382	65376851	+	ERBIN_dup1
chr5	75995413	75995414	MACS_peak_660	79.39	5_Distal	-12814	76008228	76008713	+	NCRUPAR
chr5	77590616	77590617	MACS_peak_661	79.52	5_TSS	-38	77590579	77298150	-	AP3B1_dup1
chr5	77655773	77655774	MACS_peak_662	239.04	5_TSS	-553	77656327	77776562	+	SCAMP1_dup1
chr5	77656248	77656249	MACS_peak_663	96.04	5_TSS	-78	77656327	77776562	+	SCAMP1_dup1
chr5	81047327	81047328	MACS_peak_664	81.28	5_TSS	-256	81047072	80708626	-	SSBP2_dup1
chr5	91628129	91628130	MACS_peak_665	62.09	Intergenic	-948940	90679190	90664449	-	ARRDC3_dup3
chr5	92131533	92131534	MACS_peak_666	96.04	Intergenic	775515	92907049	92745062	-	NR2F1-AS1
chr5	92917368	92917369	MACS_peak_667	96.98	5_TSS	-1674	92919043	92930315	+	NR2F1
chr5	92917681	92917682	MACS_peak_668	426.96	5_TSS	-1361	92919043	92930315	+	NR2F1
chr5	92919037	92919038	MACS_peak_669	61.8	5_TSS	-5	92919043	92930315	+	NR2F1
chr5	93172333	93172334	MACS_peak_670	58.03	5_Distal	-95025	93077309	93076015	-	POU5F2
chr5	96270936	96270937	MACS_peak_671	267.77	5_TSS	-409	96271346	96365115	+	LNPEP
chr5	96271703	96271704	MACS_peak_672	301.28	5_TSS	358	96271346	96365115	+	LNPEP
chr5	98547509	98547510	MACS_peak_673	54.49	Intergenic	282672	98264838	98266713	+	LOC100289230
chr5	110867588	110867589	MACS_peak_674	59.01	5_Distal	-19294	110848295	110831732	-	STARD4_dup1
chr5	112824275	112824276	MACS_peak_675	68.36	5_Distal	-53548	112770728	112768251	-	TSSK1B
chr5	115430786	115430787	MACS_peak_676	57.41	3_Distal	43624	115387163	115394827	+	ARL14EPL
chr5	115910554	115910555	MACS_peak_677	90.64	5_TSS	67	115910622	115779251	-	SEMA6A_dup1
chr5	127783094	127783095	MACS_peak_678	63.39	Intragenic	90640	127873735	127593601	-	FBN2
chr5	133598541	133598542	MACS_peak_679	99.14	5_Distal	-36592	133561950	133532148	-	PPP2CA
chr5	135325159	135325160	MACS_peak_680	54.88	5_Distal	-34437	135290723	135282600	-	LECT2
chr5	137103789	137103790	MACS_peak_681	58.91	5_Distal	-13751	137090039	137087073	-	HNRNPA0
chr5	139017161	139017162	MACS_peak_682	83.15	5_Proximal	-9722	139026884	139063470	+	CXXC5
chr5	139018158	139018159	MACS_peak_683	76.14	5_Proximal	-8725	139026884	139063470	+	CXXC5
chr5	139027876	139027877	MACS_peak_684	74.27	5_TSS	0	139027877	139063470	+	CXXC5_dup2
chr5	154667613	154667614	MACS_peak_685	66.65	Intergenic	274299	154393315	154397692	+	KIF4B
chr5	154790002	154790003	MACS_peak_686	56.92	Intergenic	396688	154393315	154397692	+	KIF4B
chr5	163754407	163754408	MACS_peak_687	59.56	Intergenic	140000	163894408	163875428	-	LINC02143
chr6	4648043	4648044	MACS_peak_688	78.85	3_Distal	37245	4610799	4612153	+	KU-MEL-3
chr6	8208892	8208893	MACS_peak_689	51.38	Intergenic	-122127	8086766	8086641	-	SCARNA27
chr6	9031550	9031551	MACS_peak_690	53.17	Intergenic	379109	8652442	8654080	+	HULC
chr6	26694292	26694293	MACS_peak_691	59.93	5_Distal	-34313	26659980	26634611	-	ZNF322_dup1
chr6	27862968	27862969	MACS_peak_692	73.22	3_TTS	1766	27861203	27861669	+	HIST1H2BO
chr6	37665904	37665905	MACS_peak_693	197.12	5_TSS	-139	37665766	37600284	-	MDGA1
chr6	43673866	43673867	MACS_peak_694	57.17	5_Distal	-18318	43655549	43638934	-	MRPS18A_dup1
chr6	52977372	52977373	MACS_peak_695	56.74	3_Distal	36251	53013624	52991760	-	GCM1
chr6	53224495	53224496	MACS_peak_696	167.46	5_Distal	-22081	53202415	53199258	-	RPS16P5
chr6	53409878	53409879	MACS_peak_697	256.85	5_TSS	48	53409927	53362140	-	GCLC_dup1
chr6	53412866	53412867	MACS_peak_698	209	5_TSS	-2940	53409927	53362140	-	GCLC_dup1
chr6	53658540	53658541	MACS_peak_699	124.23	5_TSS	-1237	53659778	53788919	+	LRRC1
chr6	53659705	53659706	MACS_peak_700	184.85	5_TSS	-72	53659778	53788919	+	LRRC1
chr6	54648515	54648516	MACS_peak_701	52.81	5_Distal	-63053	54711569	54809897	+	FAM83B
chr6	57573923	57573924	MACS_peak_702	52.24	3_Distal	391509	57182415	57513376	+	PRIM2_dup1
chr6	64925827	64925828	MACS_peak_703	53.05	Intragenic	1491290	66417118	64429876	-	EYS_dup1
chr6	66157037	66157038	MACS_peak_704	57.95	Intragenic	132659	66289697	66044806	-	EYS_dup3
chr6	76032879	76032880	MACS_peak_705	50.92	3_Distal	38150	75994730	76001580	+	LOC100506804
chr6	83109827	83109828	MACS_peak_706	50.44	3_Distal	35867	83073961	83077133	+	TPBG_dup1
chr6	85579436	85579437	MACS_peak_707	55.92	Intergenic	-105483	85473954	85442216	-	TBX18
chr6	112650293	112650294	MACS_peak_708	54.96	5_Distal	-18238	112668532	112672498	+	RFPL4B
chr6	131683776	131683777	MACS_peak_709	60.39	3_Distal	112478	131571299	131604675	+	AKAP7_dup1
chr6	140023624	140023625	MACS_peak_710	56.92	5_Distal	-68585	140092210	140181608	+	LOC100132735
chr6	151990298	151990299	MACS_peak_711	151.97	5_Distal	-21332	152011631	152424408	+	ESR1
chr7	4681513	4681514	MACS_peak_712	96.04	5_Distal	-40416	4721930	4811074	+	FOXK1
chr7	10183127	10183128	MACS_peak_713	65.93	Intergenic	509228	9673900	9675447	+	PER4
chr7	10809944	10809945	MACS_peak_714	64.29	Intergenic	169868	10979813	10971580	-	NDUFA4
chr7	14619018	14619019	MACS_peak_715	55.48	Intragenic	262056	14881075	14184674	-	DGKB
chr7	22626619	22626620	MACS_peak_716	56.67	3_Distal	23664	22602956	22613617	+	LOC100506178
chr7	24271811	24271812	MACS_peak_717	60.11	5_Distal	-51995	24323807	24331484	+	NPY
chr7	25789676	25789677	MACS_peak_718	54.72	Intergenic	199929	25989606	25989539	-	MIR148A
chr7	30067934	30067935	MACS_peak_719	145.17	5_TSS	-1518	30066417	30050199	-	FKBP14_dup1
chr7	30551898	30551899	MACS_peak_720	64.44	5_Proximal	-7442	30544457	30536237	-	GGCT_dup1
chr7	30560442	30560443	MACS_peak_721	361.88	5_Distal	-15986	30544457	30536237	-	GGCT_dup1
chr7	31878824	31878825	MACS_peak_722	51.15	Intragenic	232223	32111048	31823126	-	PDE1C_dup4
chr7	43699075	43699076	MACS_peak_723	92.71	Intragenic	70064	43769140	43648055	-	COA1_dup1
chr7	46301582	46301583	MACS_peak_724	68	Intergenic	-340712	45960871	45951844	-	IGFBP3_dup1
chr7	50594420	50594421	MACS_peak_725	56.61	5_Proximal	-5036	50599457	50611161	+	DDC-AS1
chr7	50651146	50651147	MACS_peak_726	63.91	5_Distal	-17993	50633154	50526134	-	DDC_dup5
chr7	54607512	54607513	MACS_peak_727	55.09	5_TSS	-2505	54610018	54638773	+	VSTM2A_dup1
chr7	57773729	57773730	MACS_peak_728	60.89	Intergenic	263847	57509883	57533265	+	ZNF716
chr7	58035576	58035577	MACS_peak_729	50.38	Intergenic	525694	57509883	57533265	+	ZNF716
chr7	61786727	61786728	MACS_peak_730	65.32	Intergenic	977706	62764434	62751670	-	ZNF733P
chr7	61818864	61818865	MACS_peak_731	51.44	Intergenic	945569	62764434	62751670	-	ZNF733P
chr7	61981192	61981193	MACS_peak_732	68.58	Intergenic	783241	62764434	62751670	-	ZNF733P
chr7	62023095	62023096	MACS_peak_733	60.01	Intergenic	741338	62764434	62751670	-	ZNF733P
chr7	64953883	64953884	MACS_peak_734	50.18	3_Distal	115172	64838712	64866048	+	ZNF92_dup1
chr7	66395478	66395479	MACS_peak_735	96.28	3_Distal	26372	66369107	66371284	+	LOC644794
chr7	82379564	82379565	MACS_peak_736	60.11	3_TTS	412632	82792197	82383321	-	PCLO
chr7	83602874	83602875	MACS_peak_737	63.65	Intragenic	221342	83824217	83587659	-	SEMA3A
chr7	83824378	83824379	MACS_peak_738	63	5_TSS	-162	83824217	83587659	-	SEMA3A
chr7	83825669	83825670	MACS_peak_739	60.71	5_TSS	-1453	83824217	83587659	-	SEMA3A
chr7	90423750	90423751	MACS_peak_740	70.07	Intragenic	84621	90339130	90839905	+	CDK14_dup2
chr7	106119806	106119807	MACS_peak_741	56.36	Intergenic	181827	106301634	106294808	-	CCDC71L
chr7	111202657	111202658	MACS_peak_742	69.06	5_TSS	-85	111202573	110303106	-	IMMP2L
chr7	114090017	114090018	MACS_peak_743	55.68	Intragenic	23461	114066557	114294198	+	FOXP2_dup6
chr7	118477927	118477928	MACS_peak_744	55.92	Intergenic	613216	117864712	117882784	+	ANKRD7
chr7	119750316	119750317	MACS_peak_745	89.96	Intergenic	-202888	119547429	119427006	-	LVCAT5_dup3
chr7	125749365	125749366	MACS_peak_746	61.13	Intergenic	-845021	124904345	124869633	-	LOC101928254_dup1
chr7	140267167	140267168	MACS_peak_747	57.17	Intragenic	35174	140302342	140218219	-	DENND2A_dup1
chr7	148936641	148936642	MACS_peak_748	54.72	5_TSS	-100	148936742	148952700	+	ZNF212
chr7	150810481	150810482	MACS_peak_749	120.33	5_TSS	-1283	150811765	150820725	+	AGAP3_dup4
chr7	150811618	150811619	MACS_peak_750	112.27	5_TSS	-146	150811765	150820725	+	AGAP3_dup4
chr8	19674772	19674773	MACS_peak_751	361.44	5_TSS	-145	19674918	19709586	+	INTS10
chr8	25742952	25742953	MACS_peak_752	51.15	Intragenic	159687	25902640	25699246	-	EBF2
chr8	28259338	28259339	MACS_peak_753	96.66	5_Distal	-15362	28243977	28203102	-	ZNF395
chr8	28348138	28348139	MACS_peak_754	447.14	5_TSS	-304	28347835	28285926	-	FBXO16_dup1
chr8	28956426	28956427	MACS_peak_755	76.29	Intragenic	164183	29120610	28924795	-	KIF13B
chr8	29960410	29960411	MACS_peak_756	52.05	Intragenic	7489	29952922	29995222	+	LEPROTL1_dup1
chr8	30649444	30649445	MACS_peak_757	53.57	Intragenic	20907	30670352	30643126	-	PPP2CB
chr8	33330674	33330675	MACS_peak_758	296.99	5_TSS	-11	33330664	33228344	-	FUT10
chr8	35421231	35421232	MACS_peak_759	51.81	Intragenic	19322	35401910	35654068	+	UNC5D_dup1
chr8	36710148	36710149	MACS_peak_760	53.3	Intragenic	68307	36641842	36793643	+	KCNU1_dup1
chr8	39862115	39862116	MACS_peak_761	57.83	Intragenic	69642	39792474	39873910	+	IDO2
chr8	47080358	47080359	MACS_peak_762	56.98	Intergenic	448906	47529265	47490837	-	ASNSP1
chr8	52041725	52041726	MACS_peak_763	51.9	Intergenic	680279	52722005	52232137	-	PXDNL
chr8	54451141	54451142	MACS_peak_764	89.78	Intergenic	-286885	54164257	54138276	-	OPRK1_dup1
chr8	56457760	56457761	MACS_peak_765	51.61	5_Distal	-24224	56433537	56429747	-	LOC105375843
chr8	56943185	56943186	MACS_peak_766	60.16	3_Distal	43274	56986460	56986398	-	SNORD54
chr8	57736373	57736374	MACS_peak_767	51.07	Intergenic	170056	57906430	57870488	-	IMPAD1
chr8	58510355	58510356	MACS_peak_768	68.94	Intergenic	-148352	58658708	58662756	+	LOC286178
chr8	58623773	58623774	MACS_peak_769	51.38	5_Distal	-34934	58658708	58662756	+	LOC286178
chr8	59240788	59240789	MACS_peak_770	52.17	5_Distal	-56129	59184660	59168330	-	LOC101929528
chr8	59763775	59763776	MACS_peak_771	52.54	Intragenic	267991	60031767	59717977	-	TOX
chr8	63571289	63571290	MACS_peak_772	67.3	Intragenic	409789	63161501	63879031	+	NKAIN3
chr8	63721535	63721536	MACS_peak_773	88.42	Intragenic	560035	63161501	63879031	+	NKAIN3
chr8	64479617	64479618	MACS_peak_774	60.55	3_Distal	101211	64378407	64388040	+	LOC102724612
chr8	66085793	66085794	MACS_peak_775	56.14	Intragenic	6781	66092575	66073380	-	LINC00251
chr8	66468584	66468585	MACS_peak_776	52.67	Intragenic	6316	66474901	66439243	-	LINC01299
chr8	66796007	66796008	MACS_peak_777	53.55	5_Distal	-42039	66753969	66626569	-	PDE7A_dup1
chr8	67070890	67070891	MACS_peak_778	52.67	3_Distal	19989	67090880	67088612	-	CRH
chr8	67434017	67434018	MACS_peak_779	169.6	3_TTS	28527	67405491	67430759	+	C8orf46
chr8	69098095	69098096	MACS_peak_780	51.28	Intragenic	233746	68864350	69149268	+	PREX2_dup1
chr8	69861117	69861118	MACS_peak_781	56.51	Intragenic	155307	70016425	69824038	-	LINC01592
chr8	72316499	72316500	MACS_peak_782	53.22	5_Distal	-47576	72268924	72109668	-	EYA1_dup1
chr8	73340485	73340486	MACS_peak_783	54.9	Intergenic	-176617	73163869	73114987	-	LOC392232
chr8	73761708	73761709	MACS_peak_784	63.91	3_Distal	117429	73644280	73664078	+	LOC101926908
chr8	76405592	76405593	MACS_peak_785	52.67	5_Distal	-46610	76452203	76479061	+	HNF4G_dup1
chr8	82754779	82754780	MACS_peak_786	546.45	5_TSS	-259	82754521	82711818	-	SNX16_dup1
chr8	82782933	82782934	MACS_peak_787	50.45	5_Distal	-28413	82754521	82711818	-	SNX16_dup1
chr8	84628475	84628476	MACS_peak_788	54.8	Intergenic	312483	84315993	84321132	+	LINC01419
chr8	85573597	85573598	MACS_peak_789	50.02	5_Distal	-44564	85618162	85834078	+	RALYL_dup5
chr8	86753334	86753335	MACS_peak_790	52.67	3_TTS	4426	86757761	86756684	-	REXO1L2P_dup4
chr8	87354383	87354384	MACS_peak_791	53.23	5_TSS	-610	87354994	87480178	+	WWP1
chr8	87354563	87354564	MACS_peak_792	351.85	5_TSS	-430	87354994	87480178	+	WWP1
chr8	88531979	88531980	MACS_peak_793	54.3	Intergenic	354316	88886296	88882971	-	DCAF4L2
chr8	88958070	88958071	MACS_peak_794	117.62	5_Distal	-71775	88886296	88882971	-	DCAF4L2
chr8	90055839	90055840	MACS_peak_795	69.55	Intergenic	714099	90769939	90729627	-	LOC101929709
chr8	91789802	91789803	MACS_peak_796	58.83	5_Distal	-14118	91803921	91971630	+	NECAB1
chr8	94920555	94920556	MACS_peak_797	174.59	3_Proximal	7791	94928347	94928250	-	MIR378D2
chr8	97114455	97114456	MACS_peak_798	61.15	3_Distal	58564	97173020	97154561	-	GDF6
chr8	97721419	97721420	MACS_peak_799	50.49	3_Distal	215538	97505882	97624037	+	SDC2
chr8	101675828	101675829	MACS_peak_800	55.57	5_Distal	-13936	101661893	101585112	-	SNX31
chr8	102110066	102110067	MACS_peak_801	68.98	3_Distal	45785	102064282	102088479	+	FLJ42969
chr8	106730645	106730646	MACS_peak_802	60.43	3_Distal	342085	107072731	106792638	-	ZFPM2-AS1_dup1
chr8	107089608	107089609	MACS_peak_803	106.12	5_Distal	-16878	107072731	106792638	-	ZFPM2-AS1_dup1
chr8	107270294	107270295	MACS_peak_804	81.49	5_Distal	-12111	107282406	107764921	+	OXR1_dup1
chr8	109953887	109953888	MACS_peak_805	57.47	Intergenic	-154044	109799844	109791205	-	TMEM74_dup1
chr8	109954747	109954748	MACS_peak_806	525.64	Intergenic	-154904	109799844	109791205	-	TMEM74_dup1
chr8	111810981	111810982	MACS_peak_807	56.96	Intergenic	228680	112039662	111949919	-	LINC01608
chr8	112488540	112488541	MACS_peak_808	51.79	Intergenic	-240109	112248432	112111190	-	LINC01609
chr8	113473529	113473530	MACS_peak_809	52.67	Intergenic	-182192	113655722	113655812	+	MIR2053
chr8	113987528	113987529	MACS_peak_810	54.06	Intergenic	331807	113655722	113655812	+	MIR2053
chr8	119125740	119125741	MACS_peak_811	75.96	5_TSS	-1683	119124058	118811602	-	EXT1
chr8	120111991	120111992	MACS_peak_812	52.5	5_Distal	-30971	120081021	120075182	-	LOC101927513
chr8	120194270	120194271	MACS_peak_813	67.93	5_Distal	-26339	120220610	120257914	+	MAL2
chr8	120808893	120808894	MACS_peak_814	51.11	3_Distal	59276	120868170	120846181	-	DSCC1
chr8	127570611	127570612	MACS_peak_815	136.43	5_TSS	99	127570711	127564683	-	FAM84B
chr8	136820988	136820989	MACS_peak_816	51.91	Intergenic	351281	136469708	136659852	+	KHDRBS3
chr8	137000097	137000098	MACS_peak_817	54.65	Intergenic	530390	136469708	136659852	+	KHDRBS3
chr8	139079738	139079739	MACS_peak_818	51.68	3_Distal	429326	139509065	139142266	-	FAM135B
chr8	141467851	141467852	MACS_peak_819	320.02	5_Distal	-53545	141521397	141527252	+	CHRAC1_dup1
chr8	141474624	141474625	MACS_peak_820	277.71	5_Distal	-46772	141521397	141527252	+	CHRAC1_dup1
chr8	142083633	142083634	MACS_peak_821	113.81	5_Distal	-55086	142138720	142205900	+	DENND3
chr8	142213292	142213293	MACS_peak_822	183.94	3_TTS	25380	142238673	142217265	-	SLC45A4_dup1
chr8	142213976	142213977	MACS_peak_823	170.8	3_TTS	24696	142238673	142217265	-	SLC45A4_dup1
chr8	142214237	142214238	MACS_peak_824	53.1	3_TTS	24435	142238673	142217265	-	SLC45A4_dup1
chr8	144152296	144152297	MACS_peak_825	59.17	3_Distal	31671	144120626	144135720	+	C8orf31_dup1
chr8	144152610	144152611	MACS_peak_826	450.29	3_Distal	31985	144120626	144135720	+	C8orf31_dup1
chr8	144153110	144153111	MACS_peak_827	108.08	3_Distal	32485	144120626	144135720	+	C8orf31_dup1
chr8	144153357	144153358	MACS_peak_828	58.24	3_Distal	32732	144120626	144135720	+	C8orf31_dup1
chr8	145023941	145023942	MACS_peak_829	52.67	5_TSS	-4495	145019447	145019359	-	MIR661
chr8	145987939	145987940	MACS_peak_830	973.8	5_Proximal	-6970	145980970	145946294	-	ZNF251
chr8	146012962	146012963	MACS_peak_831	55.94	5_TSS	-233	146012730	145997609	-	ZNF34_dup1
chr9	2242021	2242022	MACS_peak_832	630.58	3_Distal	83566	2158456	2193623	+	SMARCA2_dup6
chr9	2242486	2242487	MACS_peak_833	64.21	3_Distal	84031	2158456	2193623	+	SMARCA2_dup6
chr9	7052849	7052850	MACS_peak_834	144.89	Intragenic	331987	6720863	7077264	+	KDM4C
chr9	38069801	38069802	MACS_peak_835	89.68	5_TSS	-592	38069210	37915895	-	SHB
chr9	47213521	47213522	MACS_peak_836	52.67	Intergenic	369853	46843669	46845159	+	LOC103908605_dup1
chr9	68406851	68406852	MACS_peak_837	73.7	5_Proximal	-8456	68415308	68415388	+	MIR4477B
chr9	75739400	75739401	MACS_peak_838	67.51	5_Distal	-27246	75766647	75785310	+	ANXA1
chr9	80772024	80772025	MACS_peak_839	52.59	5_Distal	-78966	80850991	80881983	+	CEP78_dup3
chr9	83611909	83611910	MACS_peak_840	52.91	Intergenic	692540	84304450	84198598	-	TLE1_dup1
chr9	85728754	85728755	MACS_peak_841	90.65	5_Distal	-50712	85678043	85594500	-	RASEF
chr9	88969297	88969298	MACS_peak_842	153.78	5_TSS	67	88969365	88902648	-	ZCCHC6_dup3
chr9	93862472	93862473	MACS_peak_843	155.52	5_Distal	-25059	93837414	93825576	-	LOC100129316
chr9	96528210	96528211	MACS_peak_844	56.12	5_Distal	-53428	96581639	96581703	+	MIR4291
chr9	97234553	97234554	MACS_peak_845	70.39	5_Distal	-82773	97317327	97331038	+	PCAT7_dup1
chr9	97235148	97235149	MACS_peak_846	55.62	5_Distal	-82178	97317327	97331038	+	PCAT7_dup1
chr9	102439447	102439448	MACS_peak_847	53.32	Intragenic	142723	102582171	102348068	-	LOC101928438
chr9	106352444	106352445	MACS_peak_848	52.11	Intergenic	-409545	106761990	106762763	+	LOC101928523
chr9	109625299	109625300	MACS_peak_849	69.12	5_TSS	-78	109625378	109775915	+	ZNF462_dup1
chr9	109626303	109626304	MACS_peak_850	72.94	5_TSS	926	109625378	109775915	+	ZNF462_dup1
chr9	116341270	116341271	MACS_peak_851	134.39	5_TSS	-1886	116343157	116360023	+	RGS3_dup9
chr9	119663849	119663850	MACS_peak_852	65.53	Intergenic	214269	119449581	119463579	+	TRIM32_dup1
chr9	124412700	124412701	MACS_peak_853	263.28	5_Distal	-92363	124505064	124545154	+	DAB2IP_dup1
chr9	124413445	124413446	MACS_peak_854	96.98	5_Distal	-91618	124505064	124545154	+	DAB2IP_dup1
chr9	124413616	124413617	MACS_peak_855	105.45	5_Distal	-91447	124505064	124545154	+	DAB2IP_dup1
chr9	124413801	124413802	MACS_peak_856	54.96	5_Distal	-91262	124505064	124545154	+	DAB2IP_dup1
chr9	132539656	132539657	MACS_peak_857	211.58	5_Distal	-25765	132565422	132573568	+	TOR1B_dup1
chr9	132845905	132845906	MACS_peak_858	54.06	Intragenic	29921	132815985	132902448	+	GPR107_dup1
chr9	133418347	133418348	MACS_peak_859	81.18	3_Distal	36533	133454881	133452737	-	LOC100272217
chr9	140118012	140118013	MACS_peak_860	128.79	5_TSS	-1074	140119087	140120763	+	CYSRT1
chrUn_gl000216	73229	73230	MACS_peak_861	56.21	5_TSS	-140045857	140119087	140120763	+	CYSRT1
chrUn_gl000216	126361	126362	MACS_peak_862	70.95	5_TSS	-139992725	140119087	140120763	+	CYSRT1
chrUn_gl000218	97617	97618	MACS_peak_863	108.89	5_TSS	-140021469	140119087	140120763	+	CYSRT1
chrUn_gl000219	50433	50434	MACS_peak_864	55.02	5_TSS	-140068653	140119087	140120763	+	CYSRT1
chrUn_gl000220	88967	88968	MACS_peak_865	78.7	5_TSS	-140030119	140119087	140120763	+	CYSRT1
chrUn_gl000220	126843	126844	MACS_peak_866	87.42	5_TSS	-139992243	140119087	140120763	+	CYSRT1
chrUn_gl000220	132263	132264	MACS_peak_867	97.46	5_TSS	-139986823	140119087	140120763	+	CYSRT1
chrUn_gl000224	91043	91044	MACS_peak_868	62.01	5_TSS	-140028043	140119087	140120763	+	CYSRT1
chrUn_gl000224	105594	105595	MACS_peak_869	68.93	5_TSS	-140013492	140119087	140120763	+	CYSRT1
chrX	17540744	17540745	MACS_peak_870	99.67	5_Proximal	-5813	17546558	17605281	+	LOC101928389
chrX	25034183	25034184	MACS_peak_871	55.2	5_TSS	-119	25034065	25021813	-	ARX
chrX	25035280	25035281	MACS_peak_872	52.67	5_TSS	-1216	25034065	25021813	-	ARX
chrX	40653479	40653480	MACS_peak_873	79.63	3_Distal	38969	40692449	40690470	-	LOC100132831
chrX	70474167	70474168	MACS_peak_874	94.41	5_TSS	-130	70474038	70459474	-	ZMYM3
chrX	71526846	71526847	MACS_peak_875	77.79	5_TSS	-10	71526837	71521488	-	CITED1_dup3
chrX	71528866	71528867	MACS_peak_876	125.34	5_TSS	-1830	71527037	71521488	-	CITED1_dup1
chrX	106985524	106985525	MACS_peak_877	64.71	5_Distal	-25234	106960291	106956452	-	TSC22D3_dup1
chrX	115099215	115099216	MACS_peak_878	57.95	5_Distal	-13772	115085444	114956729	-	DANT2
chrX	117125804	117125805	MACS_peak_879	63.13	5_Proximal	-6429	117119376	117031776	-	KLHL13_dup4
chrX	129086636	129086637	MACS_peak_880	132.17	3_Distal	46540	129040097	129063738	+	UTP14A_dup1
chrX	129300006	129300007	MACS_peak_881	80.07	5_Proximal	-5766	129305773	129318844	+	RAB33A
chrX	129300184	129300185	MACS_peak_882	220.02	5_Proximal	-5588	129305773	129318844	+	RAB33A
chrX	132549665	132549666	MACS_peak_883	115.17	5_TSS	-461	132549205	132435064	-	GPC4
chrX	151903235	151903236	MACS_peak_884	83.31	5_TSS	-52	151903184	151899293	-	MAGEA12_dup1
chrX	152352107	152352108	MACS_peak_885	71.99	3_Distal	13849	152338259	152340864	+	PNMA6A_dup1
chrY	6984124	6984125	MACS_peak_886	56.92	3_Distal	205398	6778727	6959724	+	TBL1Y_dup1
chrY	13448285	13448286	MACS_peak_887	54.1	Intergenic	1085103	14533389	14517915	-	GYG2P1
chrY	13451382	13451383	MACS_peak_888	63.33	Intergenic	1082006	14533389	14517915	-	GYG2P1
chrY	13692355	13692356	MACS_peak_889	64.91	Intergenic	841033	14533389	14517915	-	GYG2P1
chrY	13710447	13710448	MACS_peak_890	70.23	Intergenic	822941	14533389	14517915	-	GYG2P1
chrY	58876531	58876532	MACS_peak_891	52.62	Intergenic	-453720	59330252	59343488	+	IL9R_dup1

## Sheet: FXR1_STATs_overlap_H358-genomic
Genomic distribution of FXR1-STATs overlapped or non-overlapped peaks
	5_Distal	5_Proximal	5_TSS	Intragenic	3_TTS	3_Proximal	3_Distal	Intergenic
H358_STAT1and3_notOver_H358_FXR1	0.25	0.0263	0.074	0.1612	0.0296	0.0148	0.176	0.2681
H358_STAT1and3_over_H358_FXR1	0.1488	0.0417	0.625	0.0655	0.0238	____	0.0714	0.0238
H358_STAT1_over_H358_FXR1	0.1436	0.047	0.6136	0.0679	0.0235	____	0.0809	0.0235
H358_STAT3_over_H358_FXR1	0.1492	0.0475	0.5951	0.0721	0.0295	0.0033	0.0787	0.0246

## Sheet: AGS_FXR1_vs_FXR2
FXR1-FXR2 overlap
FXR1 chrom	FXR1 start	FXR1 end	FXR1 ID	FXR1 score	If Overlap	FXR2 chrom	FXR2 start	FXR2 end	FXR2 score	FXR2 ID	1586 in 3528 = 0.449546			FXR1 ID	Peak Summit Genomic Group	Distance to Peak Summit from TSS	Peak Summit Gene TSS	Peak Summit Gene TTS	Peak Summit Gene Strand	Peak Summit Gene Symbol
chr1	878329	878660	MACS_peak_1	194.96	1	chr1	877354	879533	85	MACS_peak_6				MACS_peak_1	3_TTS	16188	894679	879583	-	NOC2L
chr1	911647	911986	MACS_peak_2	131.03	1	chr1	910523	912762	141.93	MACS_peak_9				MACS_peak_2	Intragenic	5802	917497	910579	-	PERM1_dup1
chr1	1015323	1015573	MACS_peak_3	55.44	1	chr1	1014234	1016509	130.5	MACS_peak_19				MACS_peak_3	5_Proximal	-5742	1009687	1007126	-	RNF223
chr1	1015583	1015754	MACS_peak_4	50.9	1	chr1	1014234	1016509	130.5	MACS_peak_19				MACS_peak_4	5_Proximal	-5938	1009687	1007126	-	RNF223
chr1	1151322	1151466	MACS_peak_5	50.63	0	0	0	0	0	0				MACS_peak_5	5_TSS	-1814	1149548	1146706	-	TNFRSF4
chr1	1244030	1244202	MACS_peak_6	83.45	1	chr1	1242511	1244893	88.22	MACS_peak_26				MACS_peak_6	5_TSS	193	1243960	1247057	+	PUSL1_dup1
chr1	1244272	1244921	MACS_peak_7	310.88	1	chr1	1242511	1244893	88.22	MACS_peak_26				MACS_peak_7	5_TSS	719	1243960	1247057	+	PUSL1_dup1
chr1	1244933	1245165	MACS_peak_8	159.58	1	chr1	1242511	1244893	88.22	MACS_peak_26				MACS_peak_8	3_TTS	14992	1260067	1246965	-	INTS11_dup1
chr1	1266548	1266681	MACS_peak_9	53.11	0	0	0	0	0	0				MACS_peak_9	5_TSS	-87	1266726	1270700	+	TAS1R3
chr1	1267797	1268005	MACS_peak_10	94.2	0	0	0	0	0	0				MACS_peak_10	3_TTS	16596	1284492	1270658	-	DVL1_dup1
chr1	1268213	1268344	MACS_peak_11	53.58	0	0	0	0	0	0				MACS_peak_11	3_TTS	16238	1284492	1270658	-	DVL1_dup1
chr1	1268384	1268629	MACS_peak_12	94.84	0	0	0	0	0	0				MACS_peak_12	3_TTS	16010	1284492	1270658	-	DVL1_dup1
chr1	1269341	1269471	MACS_peak_13	94.6	0	0	0	0	0	0				MACS_peak_13	3_TTS	15082	1284492	1270658	-	DVL1_dup1
chr1	1310827	1311073	MACS_peak_14	65.43	1	chr1	1309659	1311654	216.88	MACS_peak_30				MACS_peak_14	5_TSS	-403	1310562	1309111	-	AURKAIP1_dup2
chr1	1335475	1335854	MACS_peak_15	150.76	1	chr1	1333578	1337032	260.64	MACS_peak_31				MACS_peak_15	5_TSS	857	1334910	1337426	+	LOC148413
chr1	1336383	1336647	MACS_peak_16	114.26	1	chr1	1333578	1337032	260.64	MACS_peak_31				MACS_peak_16	3_TTS	6198	1342693	1337276	-	MRPL20
chr1	1377124	1377276	MACS_peak_17	68.34	0	0	0	0	0	0				MACS_peak_17	Intragenic	6264	1370903	1378262	+	VWA1_dup1
chr1	1710116	1710419	MACS_peak_18	71.24	1	chr1	1709038	1711527	87.86	MACS_peak_45				MACS_peak_18	5_TSS	44	1710297	1682671	-	NADK_dup2
chr1	2117231	2117373	MACS_peak_19	71.03	0	0	0	0	0	0				MACS_peak_19	3_TTS	135369	1981909	2116834	+	PRKCZ
chr1	2121075	2121240	MACS_peak_20	56.48	0	0	0	0	0	0				MACS_peak_20	3_TTS	5085	2126214	2120988	-	FAAP20_dup5
chr1	2246204	2246346	MACS_peak_21	60.82	1	chr1	2245104	2247567	163.9	MACS_peak_55				MACS_peak_21	3_TTS	86161	2160134	2241652	+	SKI
chr1	2338333	2338477	MACS_peak_22	50.63	0	0	0	0	0	0				MACS_peak_22	3_TTS	15218	2323214	2336885	+	RER1
chr1	6243677	6243864	MACS_peak_23	58.42	0	0	0	0	0	0				MACS_peak_23	5_TSS	-3555	6240194	6161847	-	CHD5
chr1	6687218	6687396	MACS_peak_24	52.94	0	0	0	0	0	0				MACS_peak_24	3_TTS	13540	6673756	6684093	+	PHF13
chr1	7968563	7968699	MACS_peak_25	52.41	0	0	0	0	0	0				MACS_peak_25	3_Proximal	34615	8003225	7975931	-	TNFRSF9
chr1	8066734	8067025	MACS_peak_26	80.93	1	chr1	8063656	8066479	373.93	MACS_peak_105				MACS_peak_26	3_TTS	19584	8086393	8071779	-	ERRFI1
chr1	8069110	8069325	MACS_peak_27	59.46	0	0	0	0	0	0				MACS_peak_27	3_TTS	17191	8086393	8071779	-	ERRFI1
chr1	8917183	8917297	MACS_peak_28	57.97	1	chr1	8917387	8919252	113	MACS_peak_139				MACS_peak_28	3_TTS	14376	8931635	8921059	-	ENO1_dup1
chr1	9205215	9205359	MACS_peak_29	52.86	0	0	0	0	0	0				MACS_peak_29	3_TTS	37132	9242397	9208070	-	MIR34AHG
chr1	9884127	9884275	MACS_peak_30	66.05	1	chr1	9882529	9884799	69.75	MACS_peak_156				MACS_peak_30	5_TSS	422	9884584	9789079	-	CLSTN1_dup1
chr1	11090878	11091035	MACS_peak_31	67.07	0	0	0	0	0	0				MACS_peak_31	Intragenic	16311	11107296	11086580	-	MASP2
chr1	11091637	11091751	MACS_peak_32	68.67	0	0	0	0	0	0				MACS_peak_32	Intragenic	15596	11107296	11086580	-	MASP2
chr1	11113267	11113416	MACS_peak_33	59.13	0	0	0	0	0	0				MACS_peak_33	5_Proximal	-6001	11107296	11086580	-	MASP2
chr1	16943680	16943890	MACS_peak_34	54.74	0	0	0	0	0	0				MACS_peak_34	5_TSS	-3707	16940100	16888922	-	NBPF1
chr1	17240533	17240713	MACS_peak_35	53.58	1	chr1	17239450	17241471	87.43	MACS_peak_263				MACS_peak_35	5_Distal	-24461	17216161	17215033	-	LOC105376805_dup1
chr1	17730642	17730851	MACS_peak_36	83.95	0	0	0	0	0	0				MACS_peak_36	3_TTS	32081	17698691	17728195	+	PADI6
chr1	19587285	19587422	MACS_peak_37	52.18	0	0	0	0	0	0				MACS_peak_37	3_TTS	9245	19578075	19586622	+	MRTO4
chr1	20243492	20243670	MACS_peak_38	66.75	1	chr1	20242514	20244339	59.12	MACS_peak_306				MACS_peak_38	3_TTS	6489	20250110	20246800	-	PLA2G2E
chr1	20244754	20244935	MACS_peak_39	53.58	1	chr1	20243668	20245433	73.06	MACS_peak_307				MACS_peak_39	3_TTS	5308	20250110	20246800	-	PLA2G2E
chr1	20292089	20292198	MACS_peak_40	59.4	0	0	0	0	0	0				MACS_peak_40	3_Proximal	14023	20306152	20301924	-	PLA2G2A
chr1	20977201	20977346	MACS_peak_41	50.42	0	0	0	0	0	0				MACS_peak_41	3_TTS	17290	20959948	20978004	+	PINK1
chr1	21922066	21922200	MACS_peak_42	59.47	0	0	0	0	0	0				MACS_peak_42	3_TTS	56181	21978348	21922708	-	RAP1GAP_dup2
chr1	22000349	22000514	MACS_peak_43	56.48	0	0	0	0	0	0				MACS_peak_43	5_TSS	-4613	21995856	21922708	-	RAP1GAP_dup1
chr1	24069903	24070101	MACS_peak_44	88.29	1	chr1	24068351	24071362	192.07	MACS_peak_370				MACS_peak_44	5_TSS	194	24069856	24088549	+	ELOA
chr1	24117417	24117676	MACS_peak_45	57.26	1	chr1	24116125	24119020	119.25	MACS_peak_372				MACS_peak_45	5_TSS	-21	24117646	24122029	+	LYPLA2
chr1	24126860	24127013	MACS_peak_46	52.74	1	chr1	24125031	24128544	439.49	MACS_peak_373				MACS_peak_46	5_TSS	69	24127034	24122089	-	GALE
chr1	24127253	24127444	MACS_peak_47	59.52	1	chr1	24125031	24128544	439.49	MACS_peak_373				MACS_peak_47	5_TSS	-80	24127294	24122089	-	GALE_dup2
chr1	25174046	25174194	MACS_peak_48	54.5	1	chr1	25173855	25175827	76.76	MACS_peak_401				MACS_peak_48	3_TTS	102386	25071760	25170815	+	CLIC4
chr1	25174607	25174887	MACS_peak_49	115.44	1	chr1	25173855	25175827	76.76	MACS_peak_401				MACS_peak_49	3_TTS	103062	25071760	25170815	+	CLIC4
chr1	25558872	25558944	MACS_peak_50	64.31	1	chr1	25557908	25560384	101.93	MACS_peak_406				MACS_peak_50	5_TSS	106	25559013	25548767	-	SYF2_dup1
chr1	26146846	26147058	MACS_peak_51	62.76	1	chr1	26145266	26147628	108.23	MACS_peak_414				MACS_peak_51	5_TSS	277	26146684	26159433	+	MTFR1L_dup2
chr1	26147376	26147627	MACS_peak_52	69.08	1	chr1	26145266	26147628	108.23	MACS_peak_414				MACS_peak_52	5_TSS	105	26147319	26159433	+	MTFR1L_dup3
chr1	26394695	26394833	MACS_peak_53	51.96	0	0	0	0	0	0				MACS_peak_53	5_TSS	-609	26394125	26377796	-	TRIM63
chr1	26606047	26606230	MACS_peak_54	50.94	1	chr1	26605148	26607922	221.72	MACS_peak_430				MACS_peak_54	5_TSS	-69	26606213	26608013	+	SH3BGRL3
chr1	26606458	26606773	MACS_peak_55	91.98	1	chr1	26605148	26607922	221.72	MACS_peak_430				MACS_peak_55	5_TSS	454	26606213	26608013	+	SH3BGRL3
chr1	26798077	26798929	MACS_peak_56	380.08	1	chr1	26796592	26800710	466.23	MACS_peak_439				MACS_peak_56	5_TSS	-273	26798902	26803133	+	HMGN2
chr1	26876091	26876177	MACS_peak_57	55.93	0	0	0	0	0	0				MACS_peak_57	5_TSS	-4900	26881033	26881084	+	MIR1976
chr1	27023364	27024444	MACS_peak_58	407.45	1	chr1	27021044	27025855	416.91	MACS_peak_445				MACS_peak_58	5_TSS	-2847	27020622	27018401	-	LOC101928728
chr1	27216434	27216809	MACS_peak_59	233.61	1	chr1	27215378	27217659	185.98	MACS_peak_452				MACS_peak_59	5_TSS	261	27216869	27205873	-	GPN2
chr1	27277280	27277468	MACS_peak_60	60.06	0	0	0	0	0	0				MACS_peak_60	Intragenic	9522	27286901	27276047	-	KDF1
chr1	27324459	27324618	MACS_peak_61	65.19	0	0	0	0	0	0				MACS_peak_61	Intragenic	4356	27320195	27327377	+	TRNP1
chr1	27328139	27328330	MACS_peak_62	88.55	0	0	0	0	0	0				MACS_peak_62	3_TTS	8027	27320195	27327377	+	TRNP1
chr1	27328575	27328718	MACS_peak_63	50.85	0	0	0	0	0	0				MACS_peak_63	3_TTS	8428	27320195	27327377	+	TRNP1
chr1	27329222	27329460	MACS_peak_64	106.53	0	0	0	0	0	0				MACS_peak_64	3_TTS	9127	27320195	27327377	+	TRNP1
chr1	27330179	27330358	MACS_peak_65	61.95	0	0	0	0	0	0				MACS_peak_65	3_TTS	9042	27339333	27331511	-	FAM46B
chr1	27331812	27331948	MACS_peak_66	52.41	0	0	0	0	0	0				MACS_peak_66	3_TTS	7484	27339333	27331511	-	FAM46B
chr1	27339127	27339277	MACS_peak_67	68.86	1	chr1	27338323	27340379	155.08	MACS_peak_460				MACS_peak_67	5_TSS	121	27339333	27331511	-	FAM46B
chr1	27525683	27525829	MACS_peak_68	50.21	0	0	0	0	0	0				MACS_peak_68	5_Distal	-44162	27481621	27425300	-	SLC9A1_dup1
chr1	27725849	27726020	MACS_peak_69	73.54	0	0	0	0	0	0				MACS_peak_69	3_TTS	6809	27719148	27722317	+	GPR3
chr1	27726667	27726807	MACS_peak_70	51.51	0	0	0	0	0	0				MACS_peak_70	3_TTS	7562	27719148	27722317	+	GPR3
chr1	28564795	28564916	MACS_peak_71	55.08	0	0	0	0	0	0				MACS_peak_71	3_TTS	2236	28562602	28564616	+	ATPIF1_dup1
chr1	28836279	28836447	MACS_peak_72	63.18	1	chr1	28836513	28838408	72.5	MACS_peak_494				MACS_peak_72	3_TTS	1303	28835070	28835274	+	SNORA73B
chr1	28836602	28836723	MACS_peak_73	54.66	1	chr1	28836513	28838408	72.5	MACS_peak_494				MACS_peak_73	3_TTS	1616	28835070	28835274	+	SNORA73B
chr1	28837271	28837454	MACS_peak_74	59.31	1	chr1	28836513	28838408	72.5	MACS_peak_494				MACS_peak_74	3_TTS	2334	28835070	28835274	+	SNORA73B
chr1	28842214	28842304	MACS_peak_75	108.79	0	0	0	0	0	0				MACS_peak_75	5_TSS	-2487	28844745	28865708	+	RCC1_dup3
chr1	28844689	28844810	MACS_peak_76	81.77	1	chr1	28843442	28845568	62.61	MACS_peak_496				MACS_peak_76	5_TSS	14	28844745	28865708	+	RCC1_dup3
chr1	28903755	28904130	MACS_peak_77	131.88	1	chr1	28903128	28905800	321.71	MACS_peak_499				MACS_peak_77	3_TTS	1457	28905334	28905255	-	SNORD99
chr1	31402680	31402860	MACS_peak_78	53.58	0	0	0	0	0	0				MACS_peak_78	3_TTS	135797	31538564	31404353	-	PUM1_dup1
chr1	31402891	31403084	MACS_peak_79	55.39	0	0	0	0	0	0				MACS_peak_79	3_TTS	135594	31538564	31404353	-	PUM1_dup1
chr1	32088047	32088175	MACS_peak_80	52.04	0	0	0	0	0	0				MACS_peak_80	Intragenic	4794	32083301	32092919	+	HCRTR1
chr1	32532341	32532519	MACS_peak_81	52.64	1	chr1	32531309	32533200	74.39	MACS_peak_544				MACS_peak_81	5_Proximal	-5164	32537632	32568467	+	TMEM39B
chr1	32644943	32645117	MACS_peak_82	57.02	1	chr1	32644091	32646762	160.25	MACS_peak_548				MACS_peak_82	5_TSS	-317	32645345	32663886	+	TXLNA
chr1	32663383	32663511	MACS_peak_83	54.31	0	0	0	0	0	0				MACS_peak_83	5_TSS	-2515	32665987	32670991	+	CCDC28B_dup1
chr1	32664263	32664395	MACS_peak_84	53.35	0	0	0	0	0	0				MACS_peak_84	5_TSS	-1636	32665987	32670991	+	CCDC28B_dup1
chr1	32671235	32671550	MACS_peak_85	123.94	1	chr1	32670370	32672457	90.44	MACS_peak_550				MACS_peak_85	5_TSS	132	32671236	32674288	+	IQCC_dup1
chr1	32823488	32823594	MACS_peak_86	60.29	0	0	0	0	0	0				MACS_peak_86	3_TTS	4309	32827844	32826871	-	FAM229A
chr1	33220213	33220392	MACS_peak_87	52.74	1	chr1	33218797	33220551	76.64	MACS_peak_568				MACS_peak_87	5_Distal	-10927	33231235	33240571	+	KIAA1522_dup1
chr1	33239821	33240016	MACS_peak_88	87.49	0	0	0	0	0	0				MACS_peak_88	3_TTS	8702	33231235	33240571	+	KIAA1522_dup1
chr1	35450725	35450964	MACS_peak_89	93.28	1	chr1	35449374	35451715	229.54	MACS_peak_592				MACS_peak_89	5_TSS	96	35450948	35447127	-	TMEM35B
chr1	35637658	35637854	MACS_peak_90	58.46	0	0	0	0	0	0				MACS_peak_90	3_TTS	20971	35658746	35641979	-	SFPQ_dup1
chr1	35639439	35639652	MACS_peak_91	61.2	0	0	0	0	0	0				MACS_peak_91	3_TTS	19216	35658746	35641979	-	SFPQ_dup1
chr1	35639843	35640008	MACS_peak_92	64.4	0	0	0	0	0	0				MACS_peak_92	3_TTS	18832	35658746	35641979	-	SFPQ_dup1
chr1	35674684	35674809	MACS_peak_93	55.06	0	0	0	0	0	0				MACS_peak_93	5_Distal	-16017	35658743	35649201	-	SFPQ_dup2
chr1	36396132	36396736	MACS_peak_94	191.41	1	chr1	36395192	36398006	249.14	MACS_peak_604				MACS_peak_94	5_TSS	-428	36396683	36522063	+	AGO3_dup1
chr1	36771856	36772077	MACS_peak_95	70.2	1	chr1	36771713	36773818	63.45	MACS_peak_611				MACS_peak_95	5_TSS	-52	36771994	36786948	+	SH3D21
chr1	36772180	36772390	MACS_peak_96	50.57	1	chr1	36771713	36773818	63.45	MACS_peak_611				MACS_peak_96	5_TSS	311	36771994	36786948	+	SH3D21
chr1	37950431	37950595	MACS_peak_97	55.77	0	0	0	0	0	0				MACS_peak_97	3_TTS	4646	37945831	37945890	+	MIR6732
chr1	37950937	37951131	MACS_peak_98	68.13	0	0	0	0	0	0				MACS_peak_98	3_TTS	10911	37940119	37949978	+	ZC3H12A_dup1
chr1	38027418	38027578	MACS_peak_99	56.48	0	0	0	0	0	0				MACS_peak_99	3_TTS	34110	38061586	38032413	-	GNL2_dup1
chr1	38325577	38325979	MACS_peak_100	119.44	1	chr1	38324082	38326709	140.25	MACS_peak_626				MACS_peak_100	5_TSS	-450	38325292	38275239	-	MTF1
chr1	38455867	38456056	MACS_peak_101	51.75	1	chr1	38454815	38456798	140.5	MACS_peak_628				MACS_peak_101	5_TSS	-133	38455782	38422652	-	SF3A3_dup1
chr1	39338327	39338472	MACS_peak_102	50.42	1	chr1	39338251	39340322	110.23	MACS_peak_633				MACS_peak_102	5_TSS	624	39339050	39328162	-	MYCBP_dup1
chr1	39338733	39338943	MACS_peak_103	58.22	1	chr1	39338251	39340322	110.23	MACS_peak_633				MACS_peak_103	5_TSS	222	39339050	39328162	-	MYCBP_dup1
chr1	40708706	40708823	MACS_peak_104	52.04	0	0	0	0	0	0				MACS_peak_104	5_TSS	-4798	40713573	40717365	+	TMCO2
chr1	41487300	41487486	MACS_peak_105	53.58	0	0	0	0	0	0				MACS_peak_105	5_TSS	56	41487427	41481269	-	SLFNL1_dup1
chr1	41487965	41488106	MACS_peak_106	71.12	0	0	0	0	0	0				MACS_peak_106	5_TSS	-611	41487427	41481269	-	SLFNL1_dup1
chr1	41489660	41489825	MACS_peak_107	50.16	0	0	0	0	0	0				MACS_peak_107	5_TSS	-2302	41487427	41481269	-	SLFNL1_dup1
chr1	41490558	41490714	MACS_peak_108	66.07	0	0	0	0	0	0				MACS_peak_108	5_TSS	-3202	41487427	41481269	-	SLFNL1_dup1
chr1	43143777	43143904	MACS_peak_109	51.74	0	0	0	0	0	0				MACS_peak_109	5_TSS	-4083	43147906	43169474	+	YBX1
chr1	43150981	43151117	MACS_peak_110	56.41	0	0	0	0	0	0				MACS_peak_110	3_Proximal	27019	43124048	43142429	+	PPIH_dup1
chr1	43191232	43191349	MACS_peak_111	57.15	0	0	0	0	0	0				MACS_peak_111	3_Proximal	14624	43205925	43198764	-	CLDN19_dup1
chr1	43388035	43388206	MACS_peak_112	57.9	1	chr1	43387843	43391528	322.97	MACS_peak_699				MACS_peak_112	5_Distal	-36626	43424720	43449029	+	SLC2A1-AS1
chr1	43388783	43388875	MACS_peak_113	53.02	1	chr1	43387843	43391528	322.97	MACS_peak_699				MACS_peak_113	5_Distal	-35892	43424720	43449029	+	SLC2A1-AS1
chr1	43389990	43390594	MACS_peak_114	230.17	1	chr1	43387843	43391528	322.97	MACS_peak_699				MACS_peak_114	5_Distal	-34492	43424720	43449029	+	SLC2A1-AS1
chr1	43829409	43829574	MACS_peak_115	63.88	0	0	0	0	0	0				MACS_peak_115	5_TSS	863	43830386	43830319	-	MIR6734
chr1	44172371	44173349	MACS_peak_116	524.84	1	chr1	44171701	44174599	324.24	MACS_peak_728				MACS_peak_116	5_TSS	447	44173012	44165409	-	KDM4A-AS1
chr1	44173373	44173593	MACS_peak_117	73.51	1	chr1	44171701	44174599	324.24	MACS_peak_728				MACS_peak_117	5_TSS	305	44173204	44396837	+	ST3GAL3_dup10
chr1	44440154	44440292	MACS_peak_118	52.46	1	chr1	44439354	44441697	166.75	MACS_peak_732				MACS_peak_118	5_TSS	-70	44440320	44443972	+	ATP6V0B_dup1
chr1	44456679	44456977	MACS_peak_119	129.2	1	chr1	44455892	44458860	260.38	MACS_peak_733				MACS_peak_119	5_TSS	-416	44457268	44462198	+	CCDC24_dup1
chr1	44457073	44457766	MACS_peak_120	458.14	1	chr1	44455892	44458860	260.38	MACS_peak_733				MACS_peak_120	5_TSS	33	44457519	44462198	+	CCDC24_dup3
chr1	44457814	44458344	MACS_peak_121	207.85	1	chr1	44455892	44458860	260.38	MACS_peak_733				MACS_peak_121	5_TSS	695	44457519	44462198	+	CCDC24_dup3
chr1	44679014	44679326	MACS_peak_122	111.64	1	chr1	44678080	44680027	98.12	MACS_peak_735				MACS_peak_122	5_TSS	65	44679125	44686351	+	DMAP1_dup1
chr1	44679385	44679568	MACS_peak_123	70.53	1	chr1	44678080	44680027	98.12	MACS_peak_735				MACS_peak_123	5_TSS	374	44679125	44686351	+	DMAP1_dup1
chr1	45246558	45246763	MACS_peak_124	95	0	0	0	0	0	0				MACS_peak_124	3_TTS	2576	45244062	45244130	+	SNORD38B
chr1	47853645	47853909	MACS_peak_125	88.66	0	0	0	0	0	0				MACS_peak_125	5_Distal	-28005	47881744	47883724	+	FOXE3
chr1	50249716	50249889	MACS_peak_126	62.09	0	0	0	0	0	0				MACS_peak_126	Intragenic	239864	50489626	48998527	-	AGBL4_dup1
chr1	52443878	52444047	MACS_peak_127	60.45	1	chr1	52442031	52444178	86.85	MACS_peak_847				MACS_peak_127	3_Distal	77908	52521843	52485804	-	TXNDC12
chr1	52498834	52499568	MACS_peak_128	374.83	1	chr1	52498046	52500402	64.56	MACS_peak_848				MACS_peak_128	5_TSS	591	52499472	52497777	-	KTI12
chr1	52526779	52526895	MACS_peak_129	58.5	0	0	0	0	0	0				MACS_peak_129	3_Proximal	10244	52516590	52518355	+	TXNDC12-AS1
chr1	53572870	53572950	MACS_peak_130	61.22	1	chr1	53572276	53574728	116.53	MACS_peak_860				MACS_peak_130	3_TTS	35395	53608304	53573600	-	SLC1A7_dup4
chr1	55194697	55194841	MACS_peak_131	50.63	0	0	0	0	0	0				MACS_peak_131	Intragenic	13287	55181495	55208328	+	TTC4_dup1
chr1	55311126	55311261	MACS_peak_132	52.64	0	0	0	0	0	0				MACS_peak_132	3_TTS	39450	55271736	55307937	+	LEXM_dup1
chr1	59245376	59245619	MACS_peak_133	112.63	1	chr1	59244376	59247291	235.22	MACS_peak_925				MACS_peak_133	3_TTS	4212	59249785	59246463	-	JUN
chr1	59404280	59404492	MACS_peak_134	60.34	0	0	0	0	0	0				MACS_peak_134	5_Distal	-81773	59486148	59553919	+	LINC01358
chr1	62023006	62023140	MACS_peak_135	56.53	0	0	0	0	0	0				MACS_peak_135	5_Distal	-96824	62119914	62121800	+	MGC34796
chr1	62633922	62634043	MACS_peak_136	53.05	0	0	0	0	0	0				MACS_peak_136	5_Distal	-26467	62660474	62678001	+	L1TD1_dup1
chr1	65321313	65321452	MACS_peak_137	51.73	0	0	0	0	0	0				MACS_peak_137	3_Distal	110579	65210778	65298914	+	RAVER2
chr1	67395783	67395947	MACS_peak_138	51.29	1	chr1	67394904	67397650	186.57	MACS_peak_1054				MACS_peak_138	5_TSS	-76	67395926	67454302	+	MIER1_dup10
chr1	67395994	67396189	MACS_peak_139	78.51	1	chr1	67394904	67397650	186.57	MACS_peak_1054				MACS_peak_139	5_TSS	205	67395926	67454302	+	MIER1_dup10
chr1	67867205	67867364	MACS_peak_140	54.83	0	0	0	0	0	0				MACS_peak_140	3_TTS	94214	67773047	67862583	+	IL12RB2_dup1
chr1	70687157	70687447	MACS_peak_141	69.5	1	chr1	70685865	70688707	277.29	MACS_peak_1089				MACS_peak_141	Intragenic	15894	70671365	70717701	+	SRSF11_dup1
chr1	71520071	71520267	MACS_peak_142	92.85	0	0	0	0	0	0				MACS_peak_142	5_Proximal	-6647	71513491	71318036	-	PTGER3_dup1
chr1	71520291	71520557	MACS_peak_143	126.23	0	0	0	0	0	0				MACS_peak_143	5_Proximal	-7007	71513491	71318036	-	PTGER3_dup1
chr1	76261609	76261856	MACS_peak_144	73.4	1	chr1	76261792	76263651	73.96	MACS_peak_1127				MACS_peak_144	5_TSS	-837	76262556	76378923	+	MSH4
chr1	76261874	76262350	MACS_peak_145	251.09	1	chr1	76261792	76263651	73.96	MACS_peak_1127				MACS_peak_145	5_TSS	-445	76262556	76378923	+	MSH4
chr1	76262362	76262584	MACS_peak_146	177.68	1	chr1	76261792	76263651	73.96	MACS_peak_1127				MACS_peak_146	5_TSS	-66	76262556	76378923	+	MSH4
chr1	76262590	76263380	MACS_peak_147	616.65	1	chr1	76261792	76263651	73.96	MACS_peak_1127				MACS_peak_147	5_TSS	398	76262556	76378923	+	MSH4
chr1	76263609	76263832	MACS_peak_148	90.37	1	chr1	76261792	76263651	73.96	MACS_peak_1127				MACS_peak_148	3_TTS	11821	76251879	76260775	+	RABGGTB_dup1
chr1	76263884	76264066	MACS_peak_149	70.86	1	chr1	76261792	76263651	73.96	MACS_peak_1127				MACS_peak_149	3_TTS	12083	76251879	76260775	+	RABGGTB_dup1
chr1	76265491	76265694	MACS_peak_150	66.2	0	0	0	0	0	0				MACS_peak_150	3_TTS	13699	76251879	76260775	+	RABGGTB_dup1
chr1	78407364	78407543	MACS_peak_151	54.21	0	0	0	0	0	0				MACS_peak_151	5_Distal	-37425	78444842	78483648	+	DNAJB4_dup1
chr1	83361204	83361383	MACS_peak_152	71.57	0	0	0	0	0	0				MACS_peak_152	3_Distal	89268	83450605	83439566	-	LINC01361_dup1
chr1	86596941	86597042	MACS_peak_153	61.52	0	0	0	0	0	0				MACS_peak_153	Intragenic	25126	86622121	86194916	-	COL24A1
chr1	87630295	87630439	MACS_peak_154	50.63	0	0	0	0	0	0				MACS_peak_154	3_Distal	32730	87597609	87602352	+	LINC01140_dup2
chr1	87797501	87797621	MACS_peak_155	55.52	1	chr1	87793057	87798538	782.93	MACS_peak_1231				MACS_peak_155	Intragenic	3441	87794151	87814607	+	LMO4
chr1	87801063	87801225	MACS_peak_156	62.25	1	chr1	87799667	87802241	118.52	MACS_peak_1232				MACS_peak_156	Intragenic	6959	87794151	87814607	+	LMO4
chr1	87847472	87847613	MACS_peak_157	57.68	0	0	0	0	0	0				MACS_peak_157	5_Distal	-10172	87837338	87819210	-	LINC01364
chr1	89573891	89574028	MACS_peak_158	51.19	0	0	0	0	0	0				MACS_peak_158	Intragenic	17859	89591842	89571816	-	GBP2
chr1	93076281	93076427	MACS_peak_159	50.21	0	0	0	0	0	0				MACS_peak_159	Intragenic	181614	93257961	92974253	-	EVI5_dup1
chr1	94203720	94203835	MACS_peak_160	52.04	0	0	0	0	0	0				MACS_peak_160	5_Distal	-56397	94147394	94027343	-	BCAR3_dup3
chr1	100503562	100503826	MACS_peak_161	147.04	1	chr1	100502474	100505539	345.39	MACS_peak_1385				MACS_peak_161	5_TSS	-135	100503789	100548929	+	MFSD14A
chr1	101399862	101400007	MACS_peak_162	50.42	0	0	0	0	0	0				MACS_peak_162	Intragenic	38271	101361634	101447311	+	SLC30A7_dup1
chr1	109647984	109648128	MACS_peak_163	50.63	0	0	0	0	0	0				MACS_peak_163	3_TTS	5263	109642815	109643234	+	SCARNA2
chr1	109783219	109783532	MACS_peak_164	157.77	0	0	0	0	0	0				MACS_peak_164	5_Proximal	-9313	109792641	109818378	+	CELSR2
chr1	109784064	109784236	MACS_peak_165	59.78	0	0	0	0	0	0				MACS_peak_165	5_Proximal	-8533	109792641	109818378	+	CELSR2
chr1	109784280	109784580	MACS_peak_166	91.22	0	0	0	0	0	0				MACS_peak_166	5_Proximal	-8250	109792641	109818378	+	CELSR2
chr1	109784597	109784901	MACS_peak_167	108.85	0	0	0	0	0	0				MACS_peak_167	5_Proximal	-8000	109792641	109818378	+	CELSR2
chr1	109784929	109785294	MACS_peak_168	143.88	0	0	0	0	0	0				MACS_peak_168	5_Proximal	-7463	109792641	109818378	+	CELSR2
chr1	109825210	109825384	MACS_peak_169	63.05	1	chr1	109824746	109827136	255.91	MACS_peak_1433				MACS_peak_169	5_TSS	490	109825790	109822176	-	PSRC1_dup1
chr1	109825963	109826187	MACS_peak_170	122.4	1	chr1	109824746	109827136	255.91	MACS_peak_1433				MACS_peak_170	5_TSS	-294	109825790	109822176	-	PSRC1_dup1
chr1	110532167	110532315	MACS_peak_171	56.99	0	0	0	0	0	0				MACS_peak_171	Intragenic	4826	110527387	110566364	+	AHCYL1_dup1
chr1	112897351	112897517	MACS_peak_172	54.25	0	0	0	0	0	0				MACS_peak_172	5_Distal	-41331	112938800	113003786	+	CTTNBP2NL
chr1	113216551	113217740	MACS_peak_173	830.02	1	chr1	113215806	113218721	224.25	MACS_peak_1485				MACS_peak_173	5_TSS	41	113217095	113243368	+	MOV10_dup2
chr1	115258940	115259648	MACS_peak_174	506.28	1	chr1	115258051	115260507	247.03	MACS_peak_1528				MACS_peak_174	5_TSS	195	115259515	115247085	-	NRAS
chr1	118235854	118235947	MACS_peak_175	61.52	0	0	0	0	0	0				MACS_peak_175	3_Distal	87295	118148604	118171011	+	FAM46C
chr1	118323033	118323166	MACS_peak_176	53.11	0	0	0	0	0	0				MACS_peak_176	3_Distal	149180	118472302	118406107	-	GDAP2
chr1	121484093	121485441	MACS_peak_177	337.28	0	0	0	0	0	0				MACS_peak_177	Intergenic	224126	121260910	121313686	+	EMBP1
chr1	144526805	144526899	MACS_peak_178	53.4	0	0	0	0	0	0				MACS_peak_178	3_Distal	85868	144612719	144610815	-	PFN1P2
chr1	145450320	145450473	MACS_peak_179	50.33	0	0	0	0	0	0				MACS_peak_179	3_Proximal	11017	145439347	145442644	+	TXNIP_dup1
chr1	145454113	145454226	MACS_peak_180	57.87	1	chr1	145454146	145458550	223.24	MACS_peak_1606				MACS_peak_180	3_TTS	16254	145470408	145456236	-	POLR3GL_dup1
chr1	145525188	145525332	MACS_peak_181	53.26	0	0	0	0	0	0				MACS_peak_181	5_TSS	352	145524891	145543868	+	ITGA10_dup1
chr1	145588850	145589327	MACS_peak_182	159.76	1	chr1	145587780	145590572	224.84	MACS_peak_1615				MACS_peak_182	5_TSS	401	145589435	145586493	-	NUDT17
chr1	145589331	145589559	MACS_peak_183	94.37	1	chr1	145587780	145590572	224.84	MACS_peak_1615				MACS_peak_183	5_TSS	5	145589435	145586493	-	NUDT17
chr1	145589568	145589841	MACS_peak_184	127.17	1	chr1	145587780	145590572	224.84	MACS_peak_1615				MACS_peak_184	5_TSS	-288	145589435	145586493	-	NUDT17
chr1	150088808	150088984	MACS_peak_185	51.38	0	0	0	0	0	0				MACS_peak_185	5_Distal	-32778	150121624	150132260	+	PLEKHO1_dup1
chr1	150187285	150187469	MACS_peak_186	52.37	0	0	0	0	0	0				MACS_peak_186	3_TTS	19650	150207026	150190717	-	ANP32E
chr1	151020837	151021145	MACS_peak_187	107.27	0	0	0	0	0	0				MACS_peak_187	5_TSS	804	151020216	151023272	+	C1orf56
chr1	151022272	151022797	MACS_peak_188	149.79	0	0	0	0	0	0				MACS_peak_188	3_TTS	2132	151020216	151023272	+	C1orf56
chr1	151372186	151372671	MACS_peak_189	90.28	1	chr1	151371039	151373456	163	MACS_peak_1675				MACS_peak_189	5_TSS	411	151372041	151374412	+	PSMB4
chr1	151512545	151513140	MACS_peak_190	141.91	1	chr1	151511174	151514721	186.83	MACS_peak_1681				MACS_peak_190	5_TSS	270	151512785	151556053	+	TUFT1_dup2
chr1	151844625	151844768	MACS_peak_191	56.75	0	0	0	0	0	0				MACS_peak_191	5_Distal	-18552	151826173	151819577	-	THEM5
chr1	151952376	151952799	MACS_peak_192	87.59	1	chr1	151946526	151956163	507.31	MACS_peak_1701				MACS_peak_192	3_TTS	14249	151966714	151955386	-	S100A10
chr1	151952800	151952967	MACS_peak_193	57.98	1	chr1	151946526	151956163	507.31	MACS_peak_1701				MACS_peak_193	3_TTS	13798	151966714	151955386	-	S100A10
chr1	151952977	151953373	MACS_peak_194	121.88	1	chr1	151946526	151956163	507.31	MACS_peak_1701				MACS_peak_194	3_TTS	13506	151966714	151955386	-	S100A10
chr1	151953394	151953724	MACS_peak_195	106.5	1	chr1	151946526	151956163	507.31	MACS_peak_1701				MACS_peak_195	3_TTS	13273	151966714	151955386	-	S100A10
chr1	151953738	151954085	MACS_peak_196	83.47	1	chr1	151946526	151956163	507.31	MACS_peak_1701				MACS_peak_196	3_TTS	12906	151966714	151955386	-	S100A10
chr1	153505481	153505981	MACS_peak_197	105.78	1	chr1	153504003	153510252	496.3	MACS_peak_1723				MACS_peak_197	3_TTS	2975	153508717	153507076	-	S100A6
chr1	153619683	153620224	MACS_peak_198	285.74	0	0	0	0	0	0				MACS_peak_198	5_Distal	-11361	153631130	153634328	+	SNAPIN_dup1
chr1	153620482	153620615	MACS_peak_199	50.3	0	0	0	0	0	0				MACS_peak_199	5_Distal	-10611	153631130	153634328	+	SNAPIN_dup1
chr1	153620642	153620880	MACS_peak_200	77.48	0	0	0	0	0	0				MACS_peak_200	5_Distal	-10394	153631130	153634328	+	SNAPIN_dup1
chr1	153621561	153621706	MACS_peak_201	51.93	0	0	0	0	0	0				MACS_peak_201	5_Proximal	-9485	153631130	153634328	+	SNAPIN_dup1
chr1	153633541	153633965	MACS_peak_202	93.54	0	0	0	0	0	0				MACS_peak_202	3_TTS	9649	153643504	153634264	-	ILF2_dup1
chr1	153769188	153769325	MACS_peak_203	57.82	0	0	0	0	0	0				MACS_peak_203	3_TTS	2808	153766423	153768778	+	LOC343052
chr1	153901197	153901349	MACS_peak_204	54.14	0	0	0	0	0	0				MACS_peak_204	5_Proximal	-5786	153895451	153777383	-	GATAD2B
chr1	153918857	153919351	MACS_peak_205	127.85	1	chr1	153916540	153920333	306.8	MACS_peak_1740				MACS_peak_205	5_TSS	183	153919154	153901977	-	DENND4B
chr1	153930488	153931336	MACS_peak_206	357.17	1	chr1	153929322	153932354	219.27	MACS_peak_1741				MACS_peak_206	5_TSS	106	153931132	153920148	-	CRTC2
chr1	153936911	153937107	MACS_peak_207	51.02	1	chr1	153933901	153937744	637.41	MACS_peak_1742				MACS_peak_207	5_TSS	-2079	153934896	153934827	-	MIR6737
chr1	153945865	153946044	MACS_peak_208	53.58	0	0	0	0	0	0				MACS_peak_208	3_TTS	4472	153950451	153946745	-	JTB
chr1	153950688	153950919	MACS_peak_209	54.44	1	chr1	153948412	153951584	142.18	MACS_peak_1744				MACS_peak_209	5_TSS	-364	153950451	153946745	-	JTB
chr1	154177956	154178100	MACS_peak_210	50.63	0	0	0	0	0	0				MACS_peak_210	5_TSS	781	154178841	154171562	-	C1orf189
chr1	154244333	154244874	MACS_peak_211	190.24	1	chr1	154243768	154246346	188.8	MACS_peak_1753				MACS_peak_211	5_TSS	-411	154245039	154248355	+	HAX1_dup1
chr1	154244904	154245189	MACS_peak_212	89.79	1	chr1	154243768	154246346	188.8	MACS_peak_1753				MACS_peak_212	5_TSS	8	154245039	154248355	+	HAX1_dup1
chr1	154547505	154547697	MACS_peak_213	53.26	0	0	0	0	0	0				MACS_peak_213	Intragenic	7341	154540257	154552353	+	CHRNB2
chr1	154549818	154550060	MACS_peak_214	76.87	0	0	0	0	0	0				MACS_peak_214	Intragenic	9671	154540257	154552353	+	CHRNB2
chr1	154928671	154929059	MACS_peak_215	84.08	1	chr1	154927880	154930227	88.01	MACS_peak_1762				MACS_peak_215	5_TSS	-355	154928639	154916559	-	PBXIP1_dup1
chr1	154929079	154929727	MACS_peak_216	148.49	1	chr1	154927880	154930227	88.01	MACS_peak_1762				MACS_peak_216	5_TSS	-809	154928639	154916559	-	PBXIP1_dup1
chr1	154933723	154934066	MACS_peak_217	84.68	1	chr1	154932721	154935727	381.32	MACS_peak_1763				MACS_peak_217	5_TSS	-13	154933947	154935101	+	LOC101928120
chr1	154934101	154935059	MACS_peak_218	585.71	1	chr1	154932721	154935727	381.32	MACS_peak_1763				MACS_peak_218	5_TSS	-287	154934258	154929502	-	PYGO2
chr1	154955407	154955659	MACS_peak_219	104.66	1	chr1	154954158	154957065	371.67	MACS_peak_1766				MACS_peak_219	5_TSS	-259	154955770	154965587	+	FLAD1_dup1
chr1	154989876	154990088	MACS_peak_220	76.83	1	chr1	154988665	154991153	216.54	MACS_peak_1768				MACS_peak_220	3_TTS	14914	154975106	154991001	+	ZBTB7B_dup1
chr1	154990106	154990248	MACS_peak_221	67.1	1	chr1	154988665	154991153	216.54	MACS_peak_1768				MACS_peak_221	3_TTS	15092	154975106	154991001	+	ZBTB7B_dup1
chr1	155043367	155043733	MACS_peak_222	123.85	1	chr1	155041305	155044784	486.69	MACS_peak_1771				MACS_peak_222	5_Proximal	-7132	155036467	155017668	-	DCST1-AS1
chr1	155107759	155108510	MACS_peak_223	240.84	1	chr1	155106555	155109563	302.85	MACS_peak_1776				MACS_peak_223	5_TSS	-147	155108288	155111334	+	SLC50A1_dup3
chr1	155108555	155108714	MACS_peak_224	60.21	1	chr1	155106555	155109563	302.85	MACS_peak_1776				MACS_peak_224	5_TSS	334	155108288	155111334	+	SLC50A1_dup3
chr1	155110212	155110432	MACS_peak_225	53.33	0	0	0	0	0	0				MACS_peak_225	3_TTS	2048	155108288	155111334	+	SLC50A1_dup3
chr1	155112227	155112399	MACS_peak_226	70.2	1	chr1	155111511	155114051	153.75	MACS_peak_1777				MACS_peak_226	5_TSS	556	155112883	155112367	-	DPM3_dup1
chr1	155140331	155140526	MACS_peak_227	69.05	0	0	0	0	0	0				MACS_peak_227	3_TTS	5380	155145804	155141884	-	KRTCAP2
chr1	155231735	155232592	MACS_peak_228	843.41	1	chr1	155230712	155233435	218.18	MACS_peak_1787				MACS_peak_228	5_TSS	72	155232176	155225770	-	SCAMP3_dup1
chr1	155289058	155289287	MACS_peak_229	78.99	1	chr1	155289473	155292047	121.05	MACS_peak_1791				MACS_peak_229	5_TSS	-1448	155290640	155300909	+	RUSC1_dup1
chr1	155700060	155700229	MACS_peak_230	61.18	0	0	0	0	0	0				MACS_peak_230	5_Distal	-15413	155715559	155720479	+	MSTO2P_dup1
chr1	155880781	155881623	MACS_peak_231	704.38	1	chr1	155879755	155882691	112.51	MACS_peak_1803				MACS_peak_231	5_TSS	47	155881193	155867599	-	RIT1_dup1
chr1	155914168	155914427	MACS_peak_232	64.22	0	0	0	0	0	0				MACS_peak_232	3_TTS	2824	155911480	155912625	+	RXFP4
chr1	156111108	156111484	MACS_peak_233	170.61	1	chr1	156109970	156112371	61.02	MACS_peak_1815				MACS_peak_233	5_Proximal	-8352	156119735	156147542	+	SEMA4A
chr1	156182415	156182983	MACS_peak_234	130.26	1	chr1	156181519	156184228	343.91	MACS_peak_1818				MACS_peak_234	5_TSS	-46	156182779	156213123	+	PMF1-BGLAP_dup1
chr1	156216859	156217110	MACS_peak_235	64.22	0	0	0	0	0	0				MACS_peak_235	3_TTS	35775	156252681	156219015	-	SMG5_dup1
chr1	156493676	156493785	MACS_peak_236	67.31	0	0	0	0	0	0				MACS_peak_236	5_Distal	-23087	156470634	156433513	-	MEF2D
chr1	156561737	156562191	MACS_peak_237	141.7	1	chr1	156560216	156563165	143.74	MACS_peak_1830				MACS_peak_237	5_TSS	263	156561558	156564091	+	NAXE
chr1	156562693	156562951	MACS_peak_238	76.44	1	chr1	156560216	156563165	143.74	MACS_peak_1830				MACS_peak_238	Intragenic	1271	156561558	156564091	+	NAXE
chr1	156638848	156639057	MACS_peak_239	66.78	0	0	0	0	0	0				MACS_peak_239	3_TTS	8235	156647189	156638556	-	NES
chr1	156689347	156689488	MACS_peak_240	50.09	0	0	0	0	0	0				MACS_peak_240	3_TTS	8791	156698231	156691683	-	ISG20L2
chr1	156710532	156711314	MACS_peak_241	319.58	1	chr1	156709201	156712546	253.19	MACS_peak_1838				MACS_peak_241	5_TSS	220	156710923	156707094	-	MRPL24_dup1
chr1	156900899	156901052	MACS_peak_242	51.94	0	0	0	0	0	0				MACS_peak_242	3_TTS	5067	156906036	156905923	-	MIR765
chr1	157089862	157089997	MACS_peak_243	55.34	0	0	0	0	0	0				MACS_peak_243	5_Proximal	-8256	157098154	157098463	+	CYCSP52
chr1	159957222	159957348	MACS_peak_244	50.4	0	0	0	0	0	0				MACS_peak_244	3_Proximal	26255	159931014	159948876	+	LINC01133
chr1	160990848	160991040	MACS_peak_245	52.88	1	chr1	160988796	160992950	406.87	MACS_peak_1896				MACS_peak_245	5_TSS	175	160991133	160964996	-	F11R_dup1
chr1	161008280	161008890	MACS_peak_246	227.59	1	chr1	161007224	161009880	255.72	MACS_peak_1898				MACS_peak_246	5_TSS	245	161008774	161007422	-	TSTD1_dup1
chr1	161129098	161129413	MACS_peak_247	110.93	1	chr1	161128112	161130479	243.06	MACS_peak_1906				MACS_peak_247	5_TSS	67	161129254	161135516	+	USP21_dup1
chr1	161129416	161129615	MACS_peak_248	67.53	1	chr1	161128112	161130479	243.06	MACS_peak_1906				MACS_peak_248	5_TSS	313	161129254	161135516	+	USP21_dup1
chr1	161135744	161136117	MACS_peak_249	99.34	1	chr1	161134683	161137596	160.86	MACS_peak_1907				MACS_peak_249	5_TSS	-351	161136181	161141010	+	PPOX_dup1
chr1	161410257	161410499	MACS_peak_250	89.05	1	chr1	161409658	161411242	59.43	MACS_peak_1916				MACS_peak_250	5_Distal	-64810	161475205	161489360	+	FCGR2A_dup1
chr1	165665594	165665779	MACS_peak_251	54.7	0	0	0	0	0	0				MACS_peak_251	5_TSS	-2295	165667987	165679199	+	LOC440700
chr1	171566809	171566919	MACS_peak_252	117.95	0	0	0	0	0	0				MACS_peak_252	3_TTS	112203	171454666	171562650	+	PRRC2C
chr1	171568293	171568441	MACS_peak_253	58.24	0	0	0	0	0	0				MACS_peak_253	3_Proximal	113668	171454666	171562650	+	PRRC2C
chr1	173461598	173461733	MACS_peak_254	59.21	0	0	0	0	0	0				MACS_peak_254	3_TTS	15205	173446486	173457946	+	PRDX6
chr1	173831092	173831465	MACS_peak_255	106.51	1	chr1	173830213	173834632	316.5	MACS_peak_2113				MACS_peak_255	5_TSS	-1010	173832386	173833079	+	GAS5-AS1
chr1	173831679	173831855	MACS_peak_256	68.35	1	chr1	173830213	173834632	316.5	MACS_peak_2113				MACS_peak_256	5_TSS	-596	173832386	173833079	+	GAS5-AS1
chr1	173832800	173833049	MACS_peak_257	61.98	1	chr1	173830213	173834632	316.5	MACS_peak_2113				MACS_peak_257	5_TSS	408	173833360	173833284	-	SNORD81
chr1	173897643	173897998	MACS_peak_258	82.62	0	0	0	0	0	0				MACS_peak_258	5_Distal	-11267	173886516	173872942	-	SERPINC1
chr1	174937336	174937528	MACS_peak_259	56.73	0	0	0	0	0	0				MACS_peak_259	3_Distal	808832	174128552	174927327	+	RABGAP1L
chr1	175124841	175125242	MACS_peak_260	122.98	0	0	0	0	0	0				MACS_peak_260	3_TTS	36939	175161949	175126123	-	KIAA0040_dup1
chr1	175125463	175125728	MACS_peak_261	69.44	0	0	0	0	0	0				MACS_peak_261	3_TTS	36303	175161949	175126123	-	KIAA0040_dup1
chr1	175126146	175126468	MACS_peak_262	96.74	0	0	0	0	0	0				MACS_peak_262	3_TTS	35523	175161949	175126123	-	KIAA0040_dup1
chr1	178858718	178858974	MACS_peak_263	65.68	0	0	0	0	0	0				MACS_peak_263	5_Distal	-18682	178840215	178818670	-	ANGPTL1
chr1	179051170	179051428	MACS_peak_264	75.24	1	chr1	179049865	179052698	226.67	MACS_peak_2142				MACS_peak_264	5_TSS	191	179051112	179065129	+	TOR3A
chr1	179214175	179214397	MACS_peak_265	58.08	0	0	0	0	0	0				MACS_peak_265	5_Distal	-48580	179262849	179327814	+	SOAT1_dup1
chr1	180086779	180086902	MACS_peak_266	51.54	1	chr1	180085742	180087669	74.42	MACS_peak_2160				MACS_peak_266	5_Distal	-37110	180123968	180167169	+	QSOX1_dup1
chr1	182859181	182859511	MACS_peak_267	84.28	0	0	0	0	0	0				MACS_peak_267	3_TTS	50845	182808439	182857117	+	DHX9_dup1
chr1	183362504	183362695	MACS_peak_268	72.85	0	0	0	0	0	0				MACS_peak_268	3_Distal	78470	183441117	183430011	-	SMG7-AS1
chr1	185560726	185560830	MACS_peak_269	60.1	0	0	0	0	0	0				MACS_peak_269	Intragenic	36833	185597620	185527512	-	LINC01350
chr1	188099253	188099355	MACS_peak_270	53.02	0	0	0	0	0	0				MACS_peak_270	Intergenic	686538	187412760	187446354	+	LINC01037
chr1	188556825	188556994	MACS_peak_271	51.7	0	0	0	0	0	0				MACS_peak_271	Intergenic	1144166	187412760	187446354	+	LINC01037
chr1	192769543	192769689	MACS_peak_272	51.75	0	0	0	0	0	0				MACS_peak_272	5_Proximal	-8529	192778169	192781407	+	RGS2
chr1	193633370	193633515	MACS_peak_273	50.14	0	0	0	0	0	0				MACS_peak_273	Intergenic	359563	193273875	193335083	+	LINC01031
chr1	198114873	198115015	MACS_peak_274	54.44	0	0	0	0	0	0				MACS_peak_274	5_Distal	-11193	198126108	198291548	+	NEK7
chr1	198524767	198524929	MACS_peak_275	55.76	0	0	0	0	0	0				MACS_peak_275	5_Distal	-14806	198510075	198492352	-	ATP6V1G3_dup1
chr1	198757967	198758122	MACS_peak_276	51.17	0	0	0	0	0	0				MACS_peak_276	3_Distal	70100	198828111	198828002	-	MIR181B1
chr1	200708738	200709001	MACS_peak_277	56.74	1	chr1	200706698	200710009	257.79	MACS_peak_2375				MACS_peak_277	5_TSS	183	200708686	200829835	+	CAMSAP2_dup1
chr1	200885739	200885968	MACS_peak_278	77.39	1	chr1	200884637	200887254	173.14	MACS_peak_2377				MACS_peak_278	3_TTS	21899	200863949	200884864	+	C1orf106_dup1
chr1	200885981	200886348	MACS_peak_279	98.78	1	chr1	200884637	200887254	173.14	MACS_peak_2377				MACS_peak_279	3_TTS	22264	200863949	200884864	+	C1orf106_dup1
chr1	201347502	201347810	MACS_peak_280	77.41	1	chr1	201348046	201350160	81.41	MACS_peak_2389				MACS_peak_280	5_TSS	-868	201346828	201328136	-	TNNT2_dup1
chr1	201348747	201348988	MACS_peak_281	75.19	1	chr1	201348046	201350160	81.41	MACS_peak_2389				MACS_peak_281	5_TSS	-2023	201346828	201328136	-	TNNT2_dup1
chr1	201348989	201349225	MACS_peak_282	95.79	1	chr1	201348046	201350160	81.41	MACS_peak_2389				MACS_peak_282	5_TSS	-2210	201346828	201328136	-	TNNT2_dup1
chr1	201850025	201850172	MACS_peak_283	53.89	0	0	0	0	0	0				MACS_peak_283	5_Proximal	-7690	201857797	201861715	+	SHISA4
chr1	201850766	201850950	MACS_peak_284	53.84	0	0	0	0	0	0				MACS_peak_284	5_Proximal	-6943	201857797	201861715	+	SHISA4
chr1	201969551	201969714	MACS_peak_285	55.28	0	0	0	0	0	0				MACS_peak_285	5_TSS	-2648	201972252	201972364	+	MIR6740
chr1	201987222	201987497	MACS_peak_286	91.01	1	chr1	201985952	201989120	1790.25	MACS_peak_2403				MACS_peak_286	3_TTS	7758	201979690	201986315	+	ELF3_dup1
chr1	202099345	202099669	MACS_peak_287	84.81	0	0	0	0	0	0				MACS_peak_287	3_TTS	7390	202092029	202098634	+	GPR37L1
chr1	202100197	202100438	MACS_peak_288	64.29	0	0	0	0	0	0				MACS_peak_288	3_TTS	8301	202092029	202098634	+	GPR37L1
chr1	202691865	202692023	MACS_peak_289	51.63	0	0	0	0	0	0				MACS_peak_289	5_Distal	-12435	202679551	202559725	-	SYT2
chr1	202858189	202858390	MACS_peak_290	67.57	1	chr1	202856368	202859724	317.68	MACS_peak_2430				MACS_peak_290	5_TSS	73	202858385	202847410	-	RABIF
chr1	202995112	202995677	MACS_peak_291	133.49	1	chr1	202994000	202996670	265.24	MACS_peak_2438				MACS_peak_291	5_TSS	-368	202995649	203047864	+	PPFIA4_dup1
chr1	203332816	203332941	MACS_peak_292	65.48	0	0	0	0	0	0				MACS_peak_292	5_Distal	-12307	203320557	203309749	-	FMOD_dup1
chr1	203400480	203400614	MACS_peak_293	52.04	0	0	0	0	0	0				MACS_peak_293	5_Distal	-44314	203444883	203460479	+	PRELP_dup1
chr1	203786437	203786538	MACS_peak_294	51.73	0	0	0	0	0	0				MACS_peak_294	3_Distal	19833	203766651	203770200	+	ZBED6
chr1	203897888	203898045	MACS_peak_295	53.58	1	chr1	203898525	203900616	89.73	MACS_peak_2458				MACS_peak_295	3_Distal	66957	203830978	203840280	+	SNRPE_dup3
chr1	205405143	205405346	MACS_peak_296	60.68	0	0	0	0	0	0				MACS_peak_296	3_Distal	12301	205417526	205417430	-	MIR135B
chr1	205405396	205405848	MACS_peak_297	138.54	0	0	0	0	0	0				MACS_peak_297	3_Distal	11981	205417526	205417430	-	MIR135B
chr1	205407937	205408230	MACS_peak_298	67.75	0	0	0	0	0	0				MACS_peak_298	3_Proximal	9542	205417526	205417430	-	MIR135B
chr1	205409344	205409589	MACS_peak_299	50.27	1	chr1	205408766	205411678	140.83	MACS_peak_2494				MACS_peak_299	3_Proximal	8071	205417526	205417430	-	MIR135B
chr1	205410007	205410468	MACS_peak_300	101.64	1	chr1	205408766	205411678	140.83	MACS_peak_2494				MACS_peak_300	3_Proximal	7355	205417526	205417430	-	MIR135B
chr1	207191987	207192222	MACS_peak_301	62.87	1	chr1	207190485	207196983	358.02	MACS_peak_2527				MACS_peak_301	3_TTS	13976	207206101	207191866	-	C1orf116_dup1
chr1	211555918	211556258	MACS_peak_302	61.9	1	chr1	211554648	211557840	275.76	MACS_peak_2600				MACS_peak_302	5_TSS	-126	211556097	211605877	+	LINC00467
chr1	211644539	211644724	MACS_peak_303	52.14	0	0	0	0	0	0				MACS_peak_303	3_Proximal	21638	211666259	211649864	-	RD3_dup1
chr1	213191438	213191565	MACS_peak_304	52.87	0	0	0	0	0	0				MACS_peak_304	5_TSS	-2298	213189217	213165524	-	ANGEL2_dup1
chr1	216507110	216507307	MACS_peak_305	50.08	0	0	0	0	0	0				MACS_peak_305	Intragenic	89516	216596738	215796236	-	USH2A
chr1	222312584	222312720	MACS_peak_306	51.42	0	0	0	0	0	0				MACS_peak_306	Intergenic	-298665	222014008	222001008	-	LINC01655
chr1	222603568	222603650	MACS_peak_307	59.5	0	0	0	0	0	0				MACS_peak_307	3_Distal	117836	222721444	222695602	-	HHIPL2
chr1	222817670	222817928	MACS_peak_308	75.43	1	chr1	222815103	222819260	356.23	MACS_peak_2790				MACS_peak_308	5_TSS	142	222817645	222841354	+	MIA3_dup4
chr1	224033177	224033430	MACS_peak_309	56.83	1	chr1	224031391	224035194	293.73	MACS_peak_2817				MACS_peak_309	5_TSS	386	224033674	223967595	-	TP53BP2_dup1
chr1	224384561	224384699	MACS_peak_310	63.74	0	0	0	0	0	0				MACS_peak_310	3_TTS	13425	224371213	224381142	+	DEGS1_dup2
chr1	225051580	225051741	MACS_peak_311	53.81	0	0	0	0	0	0				MACS_peak_311	5_Distal	-65737	225117363	225155626	+	DNAH14_dup2
chr1	225617760	225617953	MACS_peak_312	58.46	1	chr1	225614160	225617873	396.74	MACS_peak_2837				MACS_peak_312	5_TSS	-1993	225615815	225589204	-	LBR_dup1
chr1	225646833	225646976	MACS_peak_313	57.73	0	0	0	0	0	0				MACS_peak_313	5_Distal	-30344	225616557	225589204	-	LBR
chr1	226029925	226030198	MACS_peak_314	95.39	1	chr1	226029058	226032633	156.09	MACS_peak_2853				MACS_peak_314	3_TTS	40386	226070420	226033233	-	TMEM63A
chr1	226030308	226030577	MACS_peak_315	81.51	1	chr1	226029058	226032633	156.09	MACS_peak_2853				MACS_peak_315	3_TTS	39986	226070420	226033233	-	TMEM63A
chr1	226030587	226030851	MACS_peak_316	71.44	1	chr1	226029058	226032633	156.09	MACS_peak_2853				MACS_peak_316	3_TTS	39701	226070420	226033233	-	TMEM63A
chr1	226031376	226031922	MACS_peak_317	191.22	1	chr1	226029058	226032633	156.09	MACS_peak_2853				MACS_peak_317	3_TTS	38804	226070420	226033233	-	TMEM63A
chr1	226032157	226032451	MACS_peak_318	68.45	1	chr1	226029058	226032633	156.09	MACS_peak_2853				MACS_peak_318	3_TTS	38169	226070420	226033233	-	TMEM63A
chr1	226036677	226036795	MACS_peak_319	50.34	0	0	0	0	0	0				MACS_peak_319	3_TTS	23743	226013002	226033262	+	EPHX1_dup2
chr1	226261801	226262047	MACS_peak_320	65.43	0	0	0	0	0	0				MACS_peak_320	3_TTS	11477	226250428	226259703	+	H3F3AP4
chr1	226263506	226263665	MACS_peak_321	51.93	0	0	0	0	0	0				MACS_peak_321	3_TTS	13122	226250428	226259703	+	H3F3AP4
chr1	226264443	226264626	MACS_peak_322	53.58	0	0	0	0	0	0				MACS_peak_322	3_TTS	14107	226250428	226259703	+	H3F3AP4
chr1	227171837	227172012	MACS_peak_323	62.74	0	0	0	0	0	0				MACS_peak_323	Intragenic	44029	227127938	227175246	+	COQ8A
chr1	227172650	227172804	MACS_peak_324	73.63	0	0	0	0	0	0				MACS_peak_324	Intragenic	44751	227127938	227175246	+	COQ8A
chr1	227327005	227327122	MACS_peak_325	50.34	0	0	0	0	0	0				MACS_peak_325	Intragenic	178752	227505826	227177566	-	CDC42BPA_dup1
chr1	227829753	227829890	MACS_peak_326	52.18	0	0	0	0	0	0				MACS_peak_326	3_Distal	55564	227885408	227884733	-	ZNF847P
chr1	227915805	227916163	MACS_peak_327	95.65	1	chr1	227914856	227918760	235.8	MACS_peak_2885				MACS_peak_327	5_TSS	-169	227916219	227968932	+	SNAP47_dup1
chr1	227916264	227916552	MACS_peak_328	105.43	1	chr1	227914856	227918760	235.8	MACS_peak_2885				MACS_peak_328	5_TSS	207	227916219	227968932	+	SNAP47_dup1
chr1	227916556	227917092	MACS_peak_329	282.04	1	chr1	227914856	227918760	235.8	MACS_peak_2885				MACS_peak_329	5_TSS	503	227916219	227968932	+	SNAP47_dup1
chr1	227917109	227917426	MACS_peak_330	71.67	1	chr1	227914856	227918760	235.8	MACS_peak_2885				MACS_peak_330	3_TTS	5736	227923112	227918890	-	JMJD4_dup1
chr1	227917428	227917643	MACS_peak_331	64.55	1	chr1	227914856	227918760	235.8	MACS_peak_2885				MACS_peak_331	3_TTS	5540	227923112	227918890	-	JMJD4_dup1
chr1	227922566	227922814	MACS_peak_332	67.77	1	chr1	227921450	227924233	198.23	MACS_peak_2886				MACS_peak_332	5_TSS	-23	227922697	227964671	+	SNAP47_dup4
chr1	227973688	227973872	MACS_peak_333	60.19	0	0	0	0	0	0				MACS_peak_333	5_Distal	-29647	228003418	228034171	+	PRSS38
chr1	228288317	228288539	MACS_peak_334	92.49	1	chr1	228288751	228292156	520.49	MACS_peak_2889				MACS_peak_334	3_TTS	2675	228291163	228288428	-	C1orf35_dup1
chr1	228289244	228289469	MACS_peak_335	55.86	1	chr1	228288751	228292156	520.49	MACS_peak_2889				MACS_peak_335	3_TTS	1809	228291163	228288428	-	C1orf35_dup1
chr1	228289648	228289901	MACS_peak_336	85.77	1	chr1	228288751	228292156	520.49	MACS_peak_2889				MACS_peak_336	Intragenic	1425	228291163	228288428	-	C1orf35_dup1
chr1	228289925	228290228	MACS_peak_337	69.25	1	chr1	228288751	228292156	520.49	MACS_peak_2889				MACS_peak_337	Intragenic	1133	228291163	228288428	-	C1orf35_dup1
chr1	228290241	228290481	MACS_peak_338	73.92	1	chr1	228288751	228292156	520.49	MACS_peak_2889				MACS_peak_338	5_TSS	855	228291163	228288428	-	C1orf35_dup1
chr1	228579249	228579403	MACS_peak_339	50.56	0	0	0	0	0	0				MACS_peak_339	3_TTS	15159	228594517	228581377	-	TRIM11
chr1	228580963	228581127	MACS_peak_340	59.5	0	0	0	0	0	0				MACS_peak_340	3_TTS	3728	228584810	228584749	-	MIR6742
chr1	231033364	231033477	MACS_peak_341	53.83	0	0	0	0	0	0				MACS_peak_341	3_Proximal	81210	231114618	231041987	-	TTC13_dup1
chr1	231417188	231417313	MACS_peak_342	57.77	0	0	0	0	0	0				MACS_peak_342	5_Distal	-40299	231376933	231359509	-	C1orf131_dup1
chr1	231458550	231458685	MACS_peak_343	51.63	0	0	0	0	0	0				MACS_peak_343	3_Proximal	14973	231473618	231468477	-	EXOC8
chr1	232711980	232712142	MACS_peak_344	53.08	0	0	0	0	0	0				MACS_peak_344	5_Distal	-60723	232651354	232533712	-	SIPA1L2
chr1	233126060	233126178	MACS_peak_345	61.93	0	0	0	0	0	0				MACS_peak_345	3_Distal	39528	233086588	233114548	+	NTPCR_dup7
chr1	233555918	233556022	MACS_peak_346	50.76	0	0	0	0	0	0				MACS_peak_346	3_Distal	92461	233463514	233520894	+	MAP3K21
chr1	234109568	234109723	MACS_peak_347	51.69	0	0	0	0	0	0				MACS_peak_347	Intragenic	69156	234040458	234460264	+	SLC35F3
chr1	234334156	234334357	MACS_peak_348	50.05	0	0	0	0	0	0				MACS_peak_348	5_Distal	-15697	234349957	234460264	+	SLC35F3_dup1
chr1	234731155	234731265	MACS_peak_349	53.85	0	0	0	0	0	0				MACS_peak_349	3_Proximal	14074	234745271	234740015	-	IRF2BP2_dup1
chr1	234743206	234743445	MACS_peak_350	56.14	1	chr1	234740245	234746034	211.56	MACS_peak_3013				MACS_peak_350	Intragenic	1886	234745271	234740015	-	IRF2BP2_dup1
chr1	235267483	235267772	MACS_peak_351	69.53	1	chr1	235266541	235268805	80.97	MACS_peak_3039				MACS_peak_351	3_Proximal	24708	235292256	235272658	-	TOMM20
chr1	235589830	235589986	MACS_peak_352	53.52	0	0	0	0	0	0				MACS_peak_352	3_Distal	77862	235667781	235610505	-	B3GALNT2
chr1	238341963	238342092	MACS_peak_353	53.28	0	0	0	0	0	0				MACS_peak_353	Intergenic	-287786	238054222	238045677	-	ZP4
chr1	239720731	239720875	MACS_peak_354	60.61	0	0	0	0	0	0				MACS_peak_354	5_Distal	-71598	239792373	240078749	+	CHRM3_dup1
chr1	244998425	244998615	MACS_peak_355	57.42	1	chr1	244995980	245000893	1149.62	MACS_peak_3155				MACS_peak_355	5_TSS	-52	244998608	245008365	+	COX20
chr1	244998637	245000205	MACS_peak_356	887.39	1	chr1	244995980	245000893	1149.62	MACS_peak_3155				MACS_peak_356	5_TSS	120	244998778	245008365	+	COX20_dup2
chr1	245002355	245002536	MACS_peak_357	58.08	0	0	0	0	0	0				MACS_peak_357	Intragenic	3708	244998778	245008365	+	COX20_dup2
chr1	246833679	246833844	MACS_peak_358	52.33	0	0	0	0	0	0				MACS_peak_358	5_Distal	-53580	246887378	246931440	+	SCCPDH
chr1	247344206	247344417	MACS_peak_359	59.46	0	0	0	0	0	0				MACS_peak_359	5_Proximal	-9011	247335319	247285277	-	ZNF124
chr1	247495402	247495720	MACS_peak_360	55.28	1	chr1	247493435	247496823	326.91	MACS_peak_3190				MACS_peak_360	5_TSS	-252	247495242	247460715	-	ZNF496
chr1	249104455	249104615	MACS_peak_361	58.68	0	0	0	0	0	0				MACS_peak_361	3_TTS	15046	249119565	249104645	-	SH3BP5L_dup1
chr1	249145147	249145346	MACS_peak_362	52.62	1	chr1	249143488	249145359	52.18	MACS_peak_3195				MACS_peak_362	Intragenic	7878	249153125	249144203	-	ZNF692
chr1	249145863	249145984	MACS_peak_363	53.05	0	0	0	0	0	0				MACS_peak_363	Intragenic	7190	249153125	249144203	-	ZNF692
chr1	249146215	249146370	MACS_peak_364	53.32	0	0	0	0	0	0				MACS_peak_364	Intragenic	6835	249153125	249144203	-	ZNF692
chr10	304059	304196	MACS_peak_365	52.18	0	0	0	0	0	0				MACS_peak_365	3_TTS	123729	180405	300577	+	ZMYND11
chr10	1066848	1067010	MACS_peak_366	75.88	0	0	0	0	0	0				MACS_peak_366	5_TSS	-1649	1068577	1090141	+	IDI2-AS1_dup1
chr10	1067140	1067366	MACS_peak_367	75.18	0	0	0	0	0	0				MACS_peak_367	5_TSS	-1316	1068577	1090141	+	IDI2-AS1_dup1
chr10	1095224	1095696	MACS_peak_368	265.17	1	chr10	1093414	1096373	385.31	MACS_peak_3208				MACS_peak_368	5_TSS	-68	1095306	1085360	-	IDI1_dup2
chr10	1095998	1096216	MACS_peak_369	51.93	1	chr10	1093414	1096373	385.31	MACS_peak_3208				MACS_peak_369	5_TSS	-799	1095306	1085360	-	IDI1_dup2
chr10	1113686	1113807	MACS_peak_370	54.05	0	0	0	0	0	0				MACS_peak_370	3_Distal	45188	1068577	1090141	+	IDI2-AS1_dup1
chr10	3815813	3815972	MACS_peak_371	58.27	1	chr10	3815880	3820836	499.39	MACS_peak_3228				MACS_peak_371	3_TTS	11546	3827473	3818188	-	KLF6_dup1
chr10	3816524	3816916	MACS_peak_372	129.45	1	chr10	3815880	3820836	499.39	MACS_peak_3228				MACS_peak_372	3_TTS	10788	3827473	3818188	-	KLF6_dup1
chr10	3816987	3817712	MACS_peak_373	462.73	1	chr10	3815880	3820836	499.39	MACS_peak_3228				MACS_peak_373	3_TTS	9975	3827473	3818188	-	KLF6_dup1
chr10	3817713	3817938	MACS_peak_374	151.63	1	chr10	3815880	3820836	499.39	MACS_peak_3228				MACS_peak_374	3_TTS	9647	3827473	3818188	-	KLF6_dup1
chr10	6160988	6161094	MACS_peak_375	60.29	1	chr10	6161271	6163233	129.37	MACS_peak_3274				MACS_peak_375	5_Distal	-25796	6186841	6277507	+	PFKFB3_dup1
chr10	8015618	8015752	MACS_peak_376	52.72	0	0	0	0	0	0				MACS_peak_376	3_Distal	78781	8094454	8092439	-	GATA3-AS1_dup1
chr10	11493634	11493845	MACS_peak_377	93.41	0	0	0	0	0	0				MACS_peak_377	3_Proximal	80519	11574279	11502509	-	USP6NL_dup1
chr10	11915970	11916108	MACS_peak_378	57.15	1	chr10	11915747	11917726	95.79	MACS_peak_3309				MACS_peak_378	3_TTS	50669	11865397	11914276	+	PROSER2
chr10	13385124	13385257	MACS_peak_379	50.89	0	0	0	0	0	0				MACS_peak_379	Intragenic	5087	13390298	13359438	-	SEPHS1_dup1
chr10	14496007	14496146	MACS_peak_380	70.61	0	0	0	0	0	0				MACS_peak_380	3_Distal	17476	14478575	14478660	+	MIR1265
chr10	27748267	27748413	MACS_peak_381	59.84	0	0	0	0	0	0				MACS_peak_381	5_Distal	-45056	27703297	27687117	-	PTCHD3
chr10	28973575	28973794	MACS_peak_382	51.93	1	chr10	28972958	28975467	140.66	MACS_peak_3495				MACS_peak_382	3_TTS	7260	28966424	28971868	+	BAMBI
chr10	28973858	28974078	MACS_peak_383	61	1	chr10	28972958	28975467	140.66	MACS_peak_3495				MACS_peak_383	3_TTS	7514	28966424	28971868	+	BAMBI
chr10	32086118	32086274	MACS_peak_384	51.42	0	0	0	0	0	0				MACS_peak_384	3_Proximal	111640	32197854	32094326	-	ARHGAP12
chr10	33540385	33540511	MACS_peak_385	51.79	1	chr10	33541010	33543107	143.58	MACS_peak_3585				MACS_peak_385	Intragenic	83391	33623833	33466419	-	NRP1_dup1
chr10	38273811	38273946	MACS_peak_386	52.04	0	0	0	0	0	0				MACS_peak_386	5_Proximal	-8274	38265583	38238500	-	ZNF25_dup10
chr10	42396836	42396965	MACS_peak_387	64.99	0	0	0	0	0	0				MACS_peak_387	Intergenic	466592	42863493	42827314	-	LOC441666
chr10	42529194	42529480	MACS_peak_388	64.29	0	0	0	0	0	0				MACS_peak_388	Intergenic	334073	42863493	42827314	-	LOC441666
chr10	42529532	42530389	MACS_peak_389	64.14	0	0	0	0	0	0				MACS_peak_389	Intergenic	333889	42863493	42827314	-	LOC441666
chr10	43878944	43879160	MACS_peak_390	60.57	0	0	0	0	0	0				MACS_peak_390	3_TTS	13728	43892794	43881065	-	HNRNPF_dup1
chr10	43879450	43879615	MACS_peak_391	59.04	0	0	0	0	0	0				MACS_peak_391	3_TTS	13223	43892794	43881065	-	HNRNPF_dup1
chr10	43879660	43879857	MACS_peak_392	97.2	0	0	0	0	0	0				MACS_peak_392	3_TTS	12487	43892279	43881065	-	HNRNPF
chr10	43880053	43880259	MACS_peak_393	84.69	0	0	0	0	0	0				MACS_peak_393	3_TTS	12167	43892279	43881065	-	HNRNPF
chr10	43880401	43880608	MACS_peak_394	64.03	0	0	0	0	0	0				MACS_peak_394	3_TTS	11776	43892279	43881065	-	HNRNPF
chr10	43892019	43892422	MACS_peak_395	134.48	1	chr10	43890563	43893928	505.27	MACS_peak_3644				MACS_peak_395	5_TSS	75	43892279	43881065	-	HNRNPF
chr10	47002285	47002656	MACS_peak_396	57.91	0	0	0	0	0	0				MACS_peak_396	3_TTS	8819	46993546	47000568	+	GPRIN2
chr10	49416893	49417036	MACS_peak_397	56.75	0	0	0	0	0	0				MACS_peak_397	5_Distal	-33752	49383186	49364602	-	FRMPD2
chr10	52207836	52207984	MACS_peak_398	54.92	0	0	0	0	0	0				MACS_peak_398	Intragenic	175829	52383737	52065345	-	SGMS1
chr10	54078350	54078493	MACS_peak_399	50.36	1	chr10	54076590	54081034	1323.74	MACS_peak_3696				MACS_peak_399	3_TTS	4402	54074041	54077417	+	DKK1
chr10	64920314	64920528	MACS_peak_400	68.75	0	0	0	0	0	0				MACS_peak_400	3_Proximal	27429	64893007	64914791	+	NRBF2_dup1
chr10	65121613	65121743	MACS_peak_401	53.82	0	0	0	0	0	0				MACS_peak_401	3_Distal	11146	65132808	65132717	-	MIR1296
chr10	71906080	71906558	MACS_peak_402	117.44	1	chr10	71904429	71907745	244.72	MACS_peak_3871				MACS_peak_402	5_TSS	370	71906496	71897737	-	TYSND1_dup1
chr10	74036749	74036896	MACS_peak_403	56.48	1	chr10	74035415	74037657	185.25	MACS_peak_3907				MACS_peak_403	3_TTS	3159	74033677	74035794	+	DDIT4
chr10	75006668	75006838	MACS_peak_404	84	1	chr10	75005497	75008259	262.04	MACS_peak_3923				MACS_peak_404	5_TSS	324	75007089	75001714	-	DNAJC9
chr10	75006844	75007305	MACS_peak_405	484.67	1	chr10	75005497	75008259	262.04	MACS_peak_3923				MACS_peak_405	5_TSS	11	75007089	75001714	-	DNAJC9
chr10	75571281	75571663	MACS_peak_406	156.66	1	chr10	75569929	75572436	151.73	MACS_peak_3935				MACS_peak_406	5_TSS	169	75571589	75561669	-	NDST2
chr10	79803323	79803637	MACS_peak_407	92.59	0	0	0	0	0	0				MACS_peak_407	3_TTS	9853	79793518	79800473	+	RPS24_dup1
chr10	79803795	79803963	MACS_peak_408	65.15	0	0	0	0	0	0				MACS_peak_408	3_TTS	10380	79793518	79800473	+	RPS24_dup1
chr10	81903779	81904013	MACS_peak_409	59.46	0	0	0	0	0	0				MACS_peak_409	3_TTS	11626	81892258	81904784	+	PLAC9_dup1
chr10	81904026	81904872	MACS_peak_410	711.61	0	0	0	0	0	0				MACS_peak_410	3_TTS	12229	81892258	81904784	+	PLAC9_dup1
chr10	81904874	81905020	MACS_peak_411	59.84	0	0	0	0	0	0				MACS_peak_411	3_TTS	12664	81892258	81904784	+	PLAC9_dup1
chr10	81906170	81906321	MACS_peak_412	68.6	0	0	0	0	0	0				MACS_peak_412	3_TTS	14018	81892258	81904784	+	PLAC9_dup1
chr10	82278508	82278672	MACS_peak_413	55.77	0	0	0	0	0	0				MACS_peak_413	5_Distal	-12423	82291006	82292879	+	LOC102723703
chr10	82283669	82283851	MACS_peak_414	70.86	0	0	0	0	0	0				MACS_peak_414	5_Proximal	-7251	82291006	82292879	+	LOC102723703
chr10	82284069	82284254	MACS_peak_415	90.19	0	0	0	0	0	0				MACS_peak_415	5_Proximal	-6836	82291006	82292879	+	LOC102723703
chr10	86912123	86912257	MACS_peak_416	50.27	0	0	0	0	0	0				MACS_peak_416	3_Distal	46492	86958661	86953177	-	LINC01519
chr10	89509072	89509199	MACS_peak_417	69.94	0	0	0	0	0	0				MACS_peak_417	3_TTS	68871	89577988	89511269	-	ATAD1_dup1
chr10	96194761	96194904	MACS_peak_418	59.93	0	0	0	0	0	0				MACS_peak_418	Intragenic	32633	96162186	96296089	+	TBC1D12
chr10	98208709	98208849	MACS_peak_419	51.51	0	0	0	0	0	0				MACS_peak_419	3_Distal	138054	98346809	98277867	-	TM9SF3
chr10	98592548	98592771	MACS_peak_420	68.42	1	chr10	98590577	98593587	232.92	MACS_peak_4203				MACS_peak_420	5_TSS	-428	98592215	98590389	-	LOC102723665
chr10	98693142	98693259	MACS_peak_421	52.21	0	0	0	0	0	0				MACS_peak_421	Intragenic	100470	98592712	98724198	+	LCOR_dup3
chr10	99186168	99186522	MACS_peak_422	151.34	1	chr10	99184613	99186978	68.35	MACS_peak_4213				MACS_peak_422	5_TSS	422	99185882	99193201	+	PGAM1
chr10	99193875	99194180	MACS_peak_423	78.07	0	0	0	0	0	0				MACS_peak_423	3_TTS	6484	99187434	99193201	+	PGAM1_dup1
chr10	99194444	99194638	MACS_peak_424	70.47	0	0	0	0	0	0				MACS_peak_424	3_TTS	7112	99187434	99193201	+	PGAM1_dup1
chr10	100174561	100174705	MACS_peak_425	52.86	1	chr10	100173956	100175769	64.8	MACS_peak_4228				MACS_peak_425	5_TSS	374	100174978	100143322	-	PYROXD2
chr10	101154462	101154627	MACS_peak_426	50.76	1	chr10	101154649	101157037	323.05	MACS_peak_4231				MACS_peak_426	3_TTS	35961	101190530	101156627	-	GOT1
chr10	102242460	102242619	MACS_peak_427	56.48	1	chr10	102240553	102242321	53.8	MACS_peak_4250				MACS_peak_427	3_TTS	19733	102222812	102243399	+	WNT8B
chr10	102755147	102755272	MACS_peak_428	50.89	0	0	0	0	0	0				MACS_peak_428	5_TSS	-1631	102756823	102767593	+	LZTS2
chr10	102827114	102827248	MACS_peak_429	51.47	1	chr10	102824793	102828612	242.98	MACS_peak_4265				MACS_peak_429	3_TTS	1147	102826056	102827898	+	KAZALD1_dup3
chr10	103542529	103542701	MACS_peak_430	76.05	1	chr10	103542101	103544535	243.71	MACS_peak_4273				MACS_peak_430	5_TSS	586	103543170	103541082	-	NPM3
chr10	103542730	103543444	MACS_peak_431	375.19	1	chr10	103542101	103544535	243.71	MACS_peak_4273				MACS_peak_431	5_TSS	40	103543170	103541082	-	NPM3
chr10	104159377	104159521	MACS_peak_432	60	1	chr10	104158352	104160149	107.81	MACS_peak_4285				MACS_peak_432	Intragenic	4131	104155353	104162286	+	NFKB2_dup3
chr10	104174604	104174757	MACS_peak_433	58.2	0	0	0	0	0	0				MACS_peak_433	5_TSS	-4920	104179571	104182893	+	FBXL15
chr10	104187546	104187674	MACS_peak_434	63.38	0	0	0	0	0	0				MACS_peak_434	Intragenic	4795	104192423	104183002	-	CUEDC2
chr10	104420794	104421041	MACS_peak_435	64.22	0	0	0	0	0	0				MACS_peak_435	3_TTS	16659	104404252	104418076	+	TRIM8_dup1
chr10	106014637	106014810	MACS_peak_436	55.6	1	chr10	106011925	106016012	525.42	MACS_peak_4327				MACS_peak_436	5_TSS	215	106014468	106027222	+	GSTO1_dup1
chr10	106028080	106028805	MACS_peak_437	330.95	1	chr10	106027564	106030289	253.53	MACS_peak_4328				MACS_peak_437	5_TSS	-217	106028163	106028094	-	MIR4482
chr10	108580300	108580446	MACS_peak_438	50.21	0	0	0	0	0	0				MACS_peak_438	Intragenic	344070	108924466	108333421	-	SORCS1_dup1
chr10	111619678	111619814	MACS_peak_439	52.41	0	0	0	0	0	0				MACS_peak_439	3_TTS	63235	111683004	111624524	-	XPNPEP1_dup8
chr10	111767617	111768222	MACS_peak_440	228.99	1	chr10	111765690	111769550	391.34	MACS_peak_4354				MACS_peak_440	5_TSS	194	111768139	111705317	-	ADD3-AS1
chr10	111870720	111870834	MACS_peak_441	50.05	0	0	0	0	0	0				MACS_peak_441	5_Distal	-96580	111967363	112047123	+	MXI1
chr10	114753410	114753543	MACS_peak_442	52.04	0	0	0	0	0	0				MACS_peak_442	5_Distal	-51659	114805114	114805335	+	SNORA87
chr10	115614737	115614867	MACS_peak_443	56.28	1	chr10	115612974	115615911	251.28	MACS_peak_4410				MACS_peak_443	5_TSS	-656	115614163	115594483	-	DCLRE1A_dup1
chr10	115860656	115860783	MACS_peak_444	52.04	1	chr10	115859171	115860968	104.87	MACS_peak_4417				MACS_peak_444	3_Distal	56936	115803806	115806667	+	ADRB1
chr10	117095044	117095179	MACS_peak_445	52.64	0	0	0	0	0	0				MACS_peak_445	Intergenic	242012	116853124	116931126	+	ATRNL1_dup1
chr10	118638136	118638285	MACS_peak_446	57.78	0	0	0	0	0	0				MACS_peak_446	5_Distal	-28886	118609288	118430703	-	HSPA12A_dup1
chr10	118638676	118638810	MACS_peak_447	51.88	0	0	0	0	0	0				MACS_peak_447	5_Distal	-29440	118609288	118430703	-	HSPA12A_dup1
chr10	118639023	118639224	MACS_peak_448	61.49	0	0	0	0	0	0				MACS_peak_448	5_Distal	-29832	118609288	118430703	-	HSPA12A_dup1
chr10	118640278	118640417	MACS_peak_449	50.74	0	0	0	0	0	0				MACS_peak_449	5_Distal	-31090	118609288	118430703	-	HSPA12A_dup1
chr10	120789752	120790539	MACS_peak_450	762.65	1	chr10	120788300	120790188	54.29	MACS_peak_4460				MACS_peak_450	5_TSS	904	120789228	120793244	+	NANOS1
chr10	121327599	121327717	MACS_peak_451	56.88	0	0	0	0	0	0				MACS_peak_451	5_Distal	-25445	121302222	121259339	-	RGS10_dup1
chr10	121527711	121527859	MACS_peak_452	57.1	0	0	0	0	0	0				MACS_peak_452	Intragenic	42200	121485559	121588662	+	INPP5F_dup1
chr10	124178552	124178703	MACS_peak_453	50.48	0	0	0	0	0	0				MACS_peak_453	3_TTS	2160	124176481	124176583	+	MIR3941
chr10	126432124	126432302	MACS_peak_454	58.96	1	chr10	126430726	126433108	89.25	MACS_peak_4541				MACS_peak_454	5_TSS	717	126432930	126307863	-	FAM53B
chr10	126432631	126433062	MACS_peak_455	190.48	1	chr10	126430726	126433108	89.25	MACS_peak_4541				MACS_peak_455	5_TSS	111	126432930	126307863	-	FAM53B
chr10	129884690	129884833	MACS_peak_456	50.07	0	0	0	0	0	0				MACS_peak_456	5_Distal	-24056	129860689	129855996	-	AS-PTPRE_dup1
chr10	131988230	131988338	MACS_peak_457	70.63	0	0	0	0	0	0				MACS_peak_457	3_Proximal	53650	131934639	131978646	+	GLRX3
chr10	131988369	131989019	MACS_peak_458	477.87	0	0	0	0	0	0				MACS_peak_458	3_Distal	54148	131934673	131977932	+	GLRX3_dup2
chr10	131989030	131989162	MACS_peak_459	52.35	0	0	0	0	0	0				MACS_peak_459	3_Distal	54441	131934673	131977932	+	GLRX3_dup2
chr10	133735290	133735435	MACS_peak_460	50.42	0	0	0	0	0	0				MACS_peak_460	5_Distal	-12624	133747955	133773338	+	PPP2R2D
chr10	134644451	134644583	MACS_peak_461	52.04	0	0	0	0	0	0				MACS_peak_461	5_Distal	-44950	134599537	134598320	-	NKX6-2
chr10	134822928	134823121	MACS_peak_462	59.35	0	0	0	0	0	0				MACS_peak_462	3_Distal	43964	134779038	134790001	+	LINC01168
chr10	135177878	135178000	MACS_peak_463	52.04	0	0	0	0	0	0				MACS_peak_463	5_Proximal	-6394	135171529	135168658	-	FUOM_dup1
chr11	208742	209007	MACS_peak_464	134.23	1	chr11	206395	209950	266.65	MACS_peak_4597				MACS_peak_464	5_TSS	-392	209336	209406	+	MIR6743
chr11	215582	215816	MACS_peak_465	61.72	0	0	0	0	0	0				MACS_peak_465	3_TTS	8186	207511	215175	+	RIC8A_dup1
chr11	215986	216161	MACS_peak_466	72.54	0	0	0	0	0	0				MACS_peak_466	3_TTS	8602	207511	215175	+	RIC8A_dup1
chr11	324321	324469	MACS_peak_467	69.39	0	0	0	0	0	0				MACS_peak_467	5_TSS	-3486	320914	319673	-	IFITM3_dup1
chr11	405413	405636	MACS_peak_468	58.26	1	chr11	405897	408497	214.3	MACS_peak_4603				MACS_peak_468	3_TTS	9471	414999	405716	-	SIGIRR
chr11	406559	407209	MACS_peak_469	298.48	1	chr11	405897	408497	214.3	MACS_peak_4603				MACS_peak_469	Intragenic	8047	414999	405716	-	SIGIRR
chr11	416505	417342	MACS_peak_470	242.36	1	chr11	415978	418317	98.33	MACS_peak_4604				MACS_peak_470	5_TSS	274	417397	405716	-	SIGIRR_dup1
chr11	417347	417805	MACS_peak_471	83.99	1	chr11	415978	418317	98.33	MACS_peak_4604				MACS_peak_471	5_TSS	-29	417397	405716	-	SIGIRR_dup1
chr11	516394	516554	MACS_peak_472	56.63	0	0	0	0	0	0				MACS_peak_472	5_Proximal	-9189	507283	494512	-	RNH1_dup4
chr11	532748	532875	MACS_peak_473	52.04	1	chr11	533026	537259	369.71	MACS_peak_4610				MACS_peak_473	3_TTS	2759	535567	532242	-	HRAS_dup1
chr11	533262	533522	MACS_peak_474	100.99	1	chr11	533026	537259	369.71	MACS_peak_4610				MACS_peak_474	Intragenic	2208	535567	532242	-	HRAS_dup1
chr11	533908	534111	MACS_peak_475	88.08	1	chr11	533026	537259	369.71	MACS_peak_4610				MACS_peak_475	Intragenic	1614	535567	532242	-	HRAS_dup1
chr11	534259	534384	MACS_peak_476	87.28	1	chr11	533026	537259	369.71	MACS_peak_4610				MACS_peak_476	Intragenic	1263	535567	532242	-	HRAS_dup1
chr11	534385	535490	MACS_peak_477	731.45	1	chr11	533026	537259	369.71	MACS_peak_4610				MACS_peak_477	5_TSS	729	535567	532242	-	HRAS_dup1
chr11	535496	535620	MACS_peak_478	123.35	1	chr11	533026	537259	369.71	MACS_peak_4610				MACS_peak_478	5_TSS	34	535567	532242	-	HRAS_dup1
chr11	535631	536229	MACS_peak_479	460.02	1	chr11	533026	537259	369.71	MACS_peak_4610				MACS_peak_479	5_TSS	-206	535567	532242	-	HRAS_dup1
chr11	536340	536513	MACS_peak_480	53.92	1	chr11	533026	537259	369.71	MACS_peak_4610				MACS_peak_480	5_TSS	-900	535567	532242	-	HRAS_dup1
chr11	536695	536836	MACS_peak_481	51.29	1	chr11	533026	537259	369.71	MACS_peak_4610				MACS_peak_481	5_TSS	-1228	535567	532242	-	HRAS_dup1
chr11	537015	537646	MACS_peak_482	186.17	1	chr11	536278	538787	129.63	MACS_peak_4611				MACS_peak_482	5_TSS	-1950	535567	532242	-	HRAS_dup1
chr11	537804	537995	MACS_peak_483	62.16	1	chr11	536278	538787	129.63	MACS_peak_4611				MACS_peak_483	5_TSS	-2337	535567	532242	-	HRAS_dup1
chr11	561058	561258	MACS_peak_484	84.57	1	chr11	558860	562546	735.76	MACS_peak_4612				MACS_peak_484	5_TSS	214	560971	564025	+	RASSF7
chr11	615692	615968	MACS_peak_485	77.29	1	chr11	614919	617040	167.75	MACS_peak_4615				MACS_peak_485	5_TSS	-71	615728	612555	-	IRF7_dup1
chr11	695652	696316	MACS_peak_486	265.77	1	chr11	693592	697121	162.69	MACS_peak_4617				MACS_peak_486	5_TSS	-232	695754	644220	-	DEAF1_dup1
chr11	706309	706461	MACS_peak_487	56.48	1	chr11	705130	708589	237.2	MACS_peak_4618				MACS_peak_487	5_TSS	298	706120	727727	+	EPS8L2
chr11	728950	729099	MACS_peak_488	55.75	1	chr11	729000	730698	55.93	MACS_peak_4620				MACS_peak_488	5_Distal	-18383	747432	765024	+	TALDO1
chr11	729249	729506	MACS_peak_489	97.4	1	chr11	729000	730698	55.93	MACS_peak_4620				MACS_peak_489	5_Distal	-17971	747432	765024	+	TALDO1
chr11	729522	729737	MACS_peak_490	69.17	1	chr11	729000	730698	55.93	MACS_peak_4620				MACS_peak_490	5_Distal	-17774	747432	765024	+	TALDO1
chr11	729858	730194	MACS_peak_491	105.97	1	chr11	729000	730698	55.93	MACS_peak_4620				MACS_peak_491	5_Distal	-17375	747432	765024	+	TALDO1
chr11	765204	765395	MACS_peak_492	59.45	0	0	0	0	0	0				MACS_peak_492	3_TTS	12226	777502	767223	-	GATD1_dup1
chr11	782081	782259	MACS_peak_493	51.84	0	0	0	0	0	0				MACS_peak_493	Intragenic	4574	777578	784284	+	LOC171391_dup1
chr11	797983	798167	MACS_peak_494	152.42	1	chr11	796871	799140	139.78	MACS_peak_4624				MACS_peak_494	5_TSS	-36	797995	790475	-	SLC25A22_dup1
chr11	798228	798473	MACS_peak_495	85.25	1	chr11	796871	799140	139.78	MACS_peak_4624				MACS_peak_495	5_TSS	-100	798269	790475	-	SLC25A22_dup2
chr11	805103	805449	MACS_peak_496	116.22	1	chr11	804358	806322	67.74	MACS_peak_4625				MACS_peak_496	5_TSS	-67	805250	799179	-	PIDD1_dup1
chr11	827253	827732	MACS_peak_497	225.47	1	chr11	825978	828717	144.76	MACS_peak_4629				MACS_peak_497	5_TSS	-928	828260	831991	+	CRACR2B_dup1
chr11	838100	838251	MACS_peak_498	58.66	1	chr11	837665	839546	65.91	MACS_peak_4630				MACS_peak_498	3_TTS	4323	842529	839721	-	POLR2L
chr11	842012	842407	MACS_peak_499	121.52	1	chr11	841383	843975	216.86	MACS_peak_4631				MACS_peak_499	5_TSS	359	842529	839721	-	POLR2L
chr11	2420650	2420819	MACS_peak_500	54.73	1	chr11	2420393	2423328	223.55	MACS_peak_4657				MACS_peak_500	5_TSS	-943	2421718	2425108	+	TSSC4_dup1
chr11	2420888	2421917	MACS_peak_501	463.08	1	chr11	2420393	2423328	223.55	MACS_peak_4657				MACS_peak_501	5_TSS	-122	2421718	2425108	+	TSSC4_dup1
chr11	2961641	2961795	MACS_peak_502	55.48	0	0	0	0	0	0				MACS_peak_502	5_Distal	-11087	2950650	2949503	-	PHLDA2
chr11	2962299	2962534	MACS_peak_503	88.08	0	0	0	0	0	0				MACS_peak_503	5_Distal	-11769	2950650	2949503	-	PHLDA2
chr11	3685103	3685288	MACS_peak_504	60.68	0	0	0	0	0	0				MACS_peak_504	3_TTS	7421	3692614	3686817	-	CHRNA10_dup1
chr11	5127177	5127316	MACS_peak_505	51.73	0	0	0	0	0	0				MACS_peak_505	3_Distal	26654	5153872	5152922	-	OR52A5
chr11	6632648	6633423	MACS_peak_506	465.85	1	chr11	6632313	6634723	276.39	MACS_peak_4696				MACS_peak_506	5_TSS	499	6633475	6632048	-	TAF10
chr11	8622391	8622528	MACS_peak_507	52.18	0	0	0	0	0	0				MACS_peak_507	5_Proximal	-6654	8615836	8413413	-	STK33_dup1
chr11	8709598	8710760	MACS_peak_508	702.42	1	chr11	8708850	8712170	374.44	MACS_peak_4710				MACS_peak_508	3_TTS	3482	8706986	8707116	+	SNORA3B
chr11	9479911	9480038	MACS_peak_509	54.56	0	0	0	0	0	0				MACS_peak_509	3_TTS	2288	9482245	9481103	-	LOC644656
chr11	9788813	9788952	MACS_peak_510	51.73	0	0	0	0	0	0				MACS_peak_510	5_Proximal	-7828	9781080	9776317	-	LOC440028
chr11	12592778	12592924	MACS_peak_511	50.21	0	0	0	0	0	0				MACS_peak_511	3_Distal	193786	12399026	12556903	+	PARVA
chr11	12626434	12626552	MACS_peak_512	56.88	0	0	0	0	0	0				MACS_peak_512	5_Distal	-69475	12695969	12966284	+	TEAD1
chr11	12804904	12805033	MACS_peak_513	51.06	0	0	0	0	0	0				MACS_peak_513	Intragenic	108976	12695969	12966284	+	TEAD1
chr11	14521138	14521275	MACS_peak_514	71.72	1	chr11	14520025	14523011	253.53	MACS_peak_4832				MACS_peak_514	5_TSS	175	14521404	14479049	-	COPB1_dup2
chr11	14521279	14521475	MACS_peak_515	53.58	1	chr11	14520025	14523011	253.53	MACS_peak_4832				MACS_peak_515	5_TSS	41	14521404	14479049	-	COPB1_dup2
chr11	15268145	15268300	MACS_peak_516	65.48	0	0	0	0	0	0				MACS_peak_516	3_TTS	97545	15170648	15268756	+	INSC_dup2
chr11	15984203	15984395	MACS_peak_517	52.43	0	0	0	0	0	0				MACS_peak_517	3_TTS	440107	16424413	15987995	-	SOX6_dup1
chr11	16647500	16647644	MACS_peak_518	60.33	0	0	0	0	0	0				MACS_peak_518	Intergenic	-112578	16760148	16779901	+	C11orf58
chr11	17194711	17194888	MACS_peak_519	54.67	0	0	0	0	0	0				MACS_peak_519	Intragenic	34756	17229543	17108124	-	PIK3C2A_dup1
chr11	18430486	18430625	MACS_peak_520	71.88	0	0	0	0	0	0				MACS_peak_520	5_TSS	-3263	18433853	18472793	+	LDHC_dup1
chr11	27384553	27385358	MACS_peak_521	254.47	1	chr11	27383714	27385984	213.84	MACS_peak_4950				MACS_peak_521	5_TSS	-453	27384795	27360061	-	CCDC34
chr11	27396889	27396975	MACS_peak_522	70.59	1	chr11	27394932	27397028	126.27	MACS_peak_4951				MACS_peak_522	5_Distal	-12136	27384795	27360061	-	CCDC34
chr11	27508716	27508862	MACS_peak_523	50.21	0	0	0	0	0	0				MACS_peak_523	5_Distal	-14475	27494322	27387508	-	LGR4_dup1
chr11	34073819	34074001	MACS_peak_524	70.2	1	chr11	34071871	34075906	381.86	MACS_peak_5038				MACS_peak_524	5_TSS	677	34073230	34120607	+	CAPRIN1_dup1
chr11	34124559	34124704	MACS_peak_525	52.43	0	0	0	0	0	0				MACS_peak_525	5_TSS	-2507	34127111	34168458	+	NAT10_dup1
chr11	34126118	34126266	MACS_peak_526	56.75	1	chr11	34125558	34128265	313.75	MACS_peak_5040				MACS_peak_526	5_TSS	-893	34127111	34168458	+	NAT10_dup1
chr11	34126290	34127469	MACS_peak_527	830.9	1	chr11	34125558	34128265	313.75	MACS_peak_5040				MACS_peak_527	5_TSS	-403	34127111	34168458	+	NAT10_dup1
chr11	36616608	36616794	MACS_peak_528	70.56	0	0	0	0	0	0				MACS_peak_528	5_TSS	389	36616322	36680841	+	C11orf74_dup7
chr11	36850568	36850703	MACS_peak_529	52.64	0	0	0	0	0	0				MACS_peak_529	Intergenic	-230825	36619829	36613493	-	RAG2_dup1
chr11	46402188	46402346	MACS_peak_530	66.82	1	chr11	46401347	46404358	218.4	MACS_peak_5158				MACS_peak_530	5_TSS	-100	46402334	46405387	+	MDK
chr11	46402424	46402913	MACS_peak_531	211.55	1	chr11	46401347	46404358	218.4	MACS_peak_5158				MACS_peak_531	5_TSS	85	46402618	46405387	+	MDK_dup1
chr11	46402986	46403137	MACS_peak_532	78.95	1	chr11	46401347	46404358	218.4	MACS_peak_5158				MACS_peak_532	5_TSS	-151	46403205	46405387	+	MDK_dup2
chr11	46906706	46906866	MACS_peak_533	56.63	0	0	0	0	0	0				MACS_peak_533	3_Distal	38782	46867962	46895967	+	LRP4-AS1
chr11	47183268	47183415	MACS_peak_534	50.3	0	0	0	0	0	0				MACS_peak_534	3_TTS	15307	47198676	47185849	-	ARFGAP2_dup1
chr11	47197916	47198814	MACS_peak_535	354.26	1	chr11	47197265	47199839	289.4	MACS_peak_5173				MACS_peak_535	5_TSS	8	47198676	47185849	-	ARFGAP2_dup1
chr11	47263291	47263436	MACS_peak_536	50.42	0	0	0	0	0	0				MACS_peak_536	5_Proximal	-6454	47269851	47290584	+	NR1H3_dup1
chr11	47599910	47601088	MACS_peak_537	875.52	1	chr11	47599370	47601759	251.49	MACS_peak_5186				MACS_peak_537	5_TSS	-63	47600567	47593749	-	KBTBD4_dup10
chr11	47736542	47736808	MACS_peak_538	97.4	1	chr11	47735617	47737868	103.84	MACS_peak_5188				MACS_peak_538	5_TSS	197	47736928	47681143	-	AGBL2
chr11	47736822	47736998	MACS_peak_539	105.09	1	chr11	47735617	47737868	103.84	MACS_peak_5188				MACS_peak_539	5_TSS	61	47736928	47681143	-	AGBL2
chr11	48077286	48077410	MACS_peak_540	55.31	0	0	0	0	0	0				MACS_peak_540	5_Distal	-40992	48118334	48118410	+	MIR3161
chr11	57062396	57062522	MACS_peak_541	54.81	0	0	0	0	0	0				MACS_peak_541	3_TTS	29941	57092413	57067103	-	TNKS1BP1
chr11	57078544	57078901	MACS_peak_542	132.9	1	chr11	57077867	57080061	98.16	MACS_peak_5195				MACS_peak_542	Intragenic	13614	57092413	57067103	-	TNKS1BP1
chr11	57227828	57228190	MACS_peak_543	76.49	1	chr11	57226807	57228907	182.23	MACS_peak_5198				MACS_peak_543	5_TSS	76	57228010	57245012	+	RTN4RL2
chr11	57414534	57414709	MACS_peak_544	82.63	0	0	0	0	0	0				MACS_peak_544	Intragenic	2810	57417417	57412560	-	YPEL4
chr11	57508766	57509279	MACS_peak_545	199.71	1	chr11	57507900	57510065	169.42	MACS_peak_5206				MACS_peak_545	5_TSS	175	57508722	57511026	+	SELENOH_dup1
chr11	57592035	57592178	MACS_peak_546	60.58	0	0	0	0	0	0				MACS_peak_546	3_Proximal	62893	57529234	57586652	+	CTNND1_dup10
chr11	57593114	57593275	MACS_peak_547	66.08	0	0	0	0	0	0				MACS_peak_547	3_Proximal	63927	57529234	57586652	+	CTNND1_dup10
chr11	59578158	59578307	MACS_peak_548	63.22	1	chr11	59577133	59579321	88.35	MACS_peak_5243				MACS_peak_548	5_TSS	88	59578345	59573608	-	MRPL16
chr11	61730332	61730495	MACS_peak_549	52.01	1	chr11	61729820	61732048	84.83	MACS_peak_5276				MACS_peak_549	3_TTS	4698	61735132	61731757	-	FTH1
chr11	61730574	61730780	MACS_peak_550	67.72	1	chr11	61729820	61732048	84.83	MACS_peak_5276				MACS_peak_550	3_TTS	4467	61735132	61731757	-	FTH1
chr11	61730792	61731041	MACS_peak_551	96.54	1	chr11	61729820	61732048	84.83	MACS_peak_5276				MACS_peak_551	3_TTS	4305	61735132	61731757	-	FTH1
chr11	61731119	61731280	MACS_peak_552	65.48	1	chr11	61729820	61732048	84.83	MACS_peak_5276				MACS_peak_552	3_TTS	3903	61735132	61731757	-	FTH1
chr11	61925058	61925201	MACS_peak_553	50.85	0	0	0	0	0	0				MACS_peak_553	5_Distal	-32604	61957710	61961009	+	SCGB1D1
chr11	62359487	62359715	MACS_peak_554	51.8	1	chr11	62357868	62360326	140.08	MACS_peak_5291				MACS_peak_554	5_TSS	-508	62359109	62342517	-	TUT1
chr11	62413619	62414190	MACS_peak_555	221.91	1	chr11	62413016	62415145	139.08	MACS_peak_5295				MACS_peak_555	5_TSS	111	62414198	62392298	-	GANAB_dup1
chr11	62432487	62432773	MACS_peak_556	151.71	1	chr11	62431572	62436131	516.48	MACS_peak_5297				MACS_peak_556	5_TSS	-267	62432894	62433042	+	SNORA57
chr11	62432867	62433012	MACS_peak_557	50.42	1	chr11	62431572	62436131	516.48	MACS_peak_5297				MACS_peak_557	5_TSS	17	62432894	62433042	+	SNORA57
chr11	62473442	62473640	MACS_peak_558	51.02	0	0	0	0	0	0				MACS_peak_558	5_TSS	-1541	62475066	62476678	+	GNG3
chr11	62473678	62473875	MACS_peak_559	62.29	0	0	0	0	0	0				MACS_peak_559	5_TSS	-1300	62475066	62476678	+	GNG3
chr11	62476910	62477218	MACS_peak_560	108.03	1	chr11	62476009	62478225	69.88	MACS_peak_5300				MACS_peak_560	5_TSS	-9	62477091	62457734	-	BSCL2_dup3
chr11	62554416	62555364	MACS_peak_561	490.33	1	chr11	62552981	62556189	292.96	MACS_peak_5305				MACS_peak_561	5_TSS	129	62554874	62557872	+	TMEM179B
chr11	62558958	62559553	MACS_peak_562	373.65	1	chr11	62558517	62560402	74.79	MACS_peak_5306				MACS_peak_562	5_TSS	262	62559486	62557787	-	TMEM223
chr11	62572798	62572961	MACS_peak_563	59.96	1	chr11	62571406	62574259	316.22	MACS_peak_5307				MACS_peak_563	5_TSS	68	62572964	62559598	-	NXF1_dup1
chr11	62573176	62573479	MACS_peak_564	86.94	1	chr11	62571406	62574259	316.22	MACS_peak_5307				MACS_peak_564	5_TSS	-395	62572964	62559598	-	NXF1_dup1
chr11	62600120	62600243	MACS_peak_565	54.56	1	chr11	62598189	62600651	296.63	MACS_peak_5308				MACS_peak_565	5_TSS	450	62599706	62601513	+	LOC105369332
chr11	62618839	62619039	MACS_peak_566	137.53	1	chr11	62618261	62620345	81.46	MACS_peak_5311				MACS_peak_566	3_TTS	1561	62620507	62620382	-	SNORD22
chr11	62656669	62656827	MACS_peak_567	63.06	1	chr11	62656768	62658578	91.98	MACS_peak_5315				MACS_peak_567	3_TTS	7543	62649171	62656355	+	SLC3A2_dup4
chr11	62657105	62657715	MACS_peak_568	283.8	1	chr11	62656768	62658578	91.98	MACS_peak_5315				MACS_peak_568	3_TTS	8125	62649171	62656355	+	SLC3A2_dup4
chr11	62658163	62658326	MACS_peak_569	65.6	1	chr11	62656768	62658578	91.98	MACS_peak_5315				MACS_peak_569	3_TTS	9037	62649171	62656355	+	SLC3A2_dup4
chr11	63390496	63390634	MACS_peak_570	52.46	0	0	0	0	0	0				MACS_peak_570	5_Proximal	-8642	63381941	63341944	-	PLA2G16_dup1
chr11	63998268	63998474	MACS_peak_571	62.69	1	chr11	63996847	63999029	93.07	MACS_peak_5337				MACS_peak_571	5_TSS	472	63997904	64001753	+	DNAJC4_dup1
chr11	64010023	64010169	MACS_peak_572	56.46	1	chr11	64008604	64010779	79.15	MACS_peak_5339				MACS_peak_572	5_TSS	479	64009588	64011607	+	FKBP2_dup2
chr11	64036828	64037522	MACS_peak_573	336.87	1	chr11	64035275	64038909	429.89	MACS_peak_5343				MACS_peak_573	5_Distal	-14706	64051811	64056972	+	GPR137
chr11	64037750	64037890	MACS_peak_574	50.22	1	chr11	64035275	64038909	429.89	MACS_peak_5343				MACS_peak_574	5_Distal	-13988	64051811	64056972	+	GPR137
chr11	64084424	64084553	MACS_peak_575	85.88	1	chr11	64083839	64086813	303.69	MACS_peak_5347				MACS_peak_575	3_TTS	11471	64073000	64084212	+	ESRRA_dup1
chr11	64084564	64084880	MACS_peak_576	114.75	1	chr11	64083839	64086813	303.69	MACS_peak_5347				MACS_peak_576	5_TSS	826	64085556	64083964	-	TRMT112_dup1
chr11	64528437	64528596	MACS_peak_577	56.85	0	0	0	0	0	0				MACS_peak_577	5_TSS	-316	64528187	64513861	-	PYGM_dup1
chr11	64529655	64529926	MACS_peak_578	88.98	0	0	0	0	0	0				MACS_peak_578	5_TSS	-1636	64528187	64513861	-	PYGM_dup1
chr11	64616951	64617163	MACS_peak_579	73.63	0	0	0	0	0	0				MACS_peak_579	5_Proximal	-5028	64612041	64591662	-	CDC42BPG
chr11	64879216	64880177	MACS_peak_580	525.75	1	chr11	64878455	64881239	163.4	MACS_peak_5375				MACS_peak_580	5_TSS	271	64879326	64883707	+	TM7SF2_dup1
chr11	64884192	64885291	MACS_peak_581	733.03	1	chr11	64883211	64886185	329.5	MACS_peak_5376				MACS_peak_581	5_TSS	113	64885210	64883875	-	ZNHIT2
chr11	65121515	65121727	MACS_peak_582	51.02	1	chr11	65121136	65123629	75.1	MACS_peak_5386				MACS_peak_582	5_TSS	-665	65122282	65125082	+	TIGD3
chr11	65193125	65193323	MACS_peak_583	53.18	1	chr11	65187708	65198986	978.25	MACS_peak_5391				MACS_peak_583	3_TTS	2964	65190269	65194003	+	NEAT1
chr11	65194582	65195335	MACS_peak_584	374.17	1	chr11	65187708	65198986	978.25	MACS_peak_5391				MACS_peak_584	3_TTS	4763	65190269	65194003	+	NEAT1
chr11	65195344	65196357	MACS_peak_585	590.1	1	chr11	65187708	65198986	978.25	MACS_peak_5391				MACS_peak_585	3_TTS	5251	65190269	65194003	+	NEAT1
chr11	65196922	65197186	MACS_peak_586	89	1	chr11	65187708	65198986	978.25	MACS_peak_5391				MACS_peak_586	3_TTS	6812	65190269	65194003	+	NEAT1
chr11	65197404	65197849	MACS_peak_587	140.53	1	chr11	65187708	65198986	978.25	MACS_peak_5391				MACS_peak_587	3_TTS	7534	65190269	65194003	+	NEAT1
chr11	65208599	65208779	MACS_peak_588	52.96	0	0	0	0	0	0				MACS_peak_588	5_TSS	-3233	65211929	65212028	+	MIR612
chr11	65213546	65213683	MACS_peak_589	62.09	0	0	0	0	0	0				MACS_peak_589	3_TTS	1703	65211929	65212028	+	MIR612
chr11	65213696	65213808	MACS_peak_590	58.54	0	0	0	0	0	0				MACS_peak_590	3_TTS	1828	65211929	65212028	+	MIR612
chr11	65214040	65214210	MACS_peak_591	73.79	0	0	0	0	0	0				MACS_peak_591	3_TTS	2240	65211929	65212028	+	MIR612
chr11	65216728	65216872	MACS_peak_592	50.63	0	0	0	0	0	0				MACS_peak_592	3_TTS	4846	65211929	65212028	+	MIR612
chr11	65270159	65270485	MACS_peak_593	70.36	1	chr11	65263937	65270066	768.46	MACS_peak_5399				MACS_peak_593	5_TSS	-3208	65273588	65273645	+	MASCRNA
chr11	65274613	65275412	MACS_peak_594	524.84	1	chr11	65273200	65276080	381.72	MACS_peak_5401				MACS_peak_594	5_TSS	48	65274903	65266783	-	TALAM1
chr11	65340028	65340448	MACS_peak_595	196.62	1	chr11	65338916	65340832	58.13	MACS_peak_5407				MACS_peak_595	5_TSS	333	65339820	65341669	+	FAM89B_dup1
chr11	65342018	65342235	MACS_peak_596	59.54	1	chr11	65340924	65342957	69.31	MACS_peak_5408				MACS_peak_596	5_TSS	-1372	65343509	65360116	+	EHBP1L1
chr11	65343357	65343639	MACS_peak_597	145.88	1	chr11	65342118	65344559	225.71	MACS_peak_5409				MACS_peak_597	5_TSS	79	65343509	65360116	+	EHBP1L1
chr11	65405520	65405687	MACS_peak_598	72.26	0	0	0	0	0	0				MACS_peak_598	5_TSS	-10	65405578	65418391	+	SIPA1
chr11	65405697	65405852	MACS_peak_599	51.66	0	0	0	0	0	0				MACS_peak_599	5_TSS	230	65405578	65418391	+	SIPA1
chr11	65420129	65420636	MACS_peak_600	162.74	1	chr11	65418319	65421649	267.55	MACS_peak_5413				MACS_peak_600	3_TTS	3749	65416663	65416724	+	MIR4489
chr11	65483848	65483994	MACS_peak_601	58.72	0	0	0	0	0	0				MACS_peak_601	3_TTS	4460	65488409	65485144	-	RNASEH2C
chr11	65487512	65487739	MACS_peak_602	51.93	1	chr11	65487148	65489005	108.3	MACS_peak_5417				MACS_peak_602	5_TSS	803	65488409	65485144	-	RNASEH2C
chr11	65617520	65617661	MACS_peak_603	51.29	0	0	0	0	0	0				MACS_peak_603	3_TTS	8238	65625804	65622285	-	CFL1
chr11	65618547	65618683	MACS_peak_604	51.42	0	0	0	0	0	0				MACS_peak_604	3_TTS	7212	65625804	65622285	-	CFL1
chr11	65637181	65637310	MACS_peak_605	74.85	0	0	0	0	0	0				MACS_peak_605	3_TTS	9392	65627872	65633914	+	MUS81
chr11	65637525	65637711	MACS_peak_606	65.48	0	0	0	0	0	0				MACS_peak_606	3_TTS	9759	65627872	65633914	+	MUS81
chr11	65658418	65659185	MACS_peak_607	439.7	1	chr11	65656678	65660351	290.87	MACS_peak_5426				MACS_peak_607	3_TTS	1171	65657875	65659106	+	CCDC85B
chr11	65659234	65659380	MACS_peak_608	53.58	1	chr11	65656678	65660351	290.87	MACS_peak_5426				MACS_peak_608	3_TTS	1422	65657875	65659106	+	CCDC85B
chr11	65837271	65837836	MACS_peak_609	216.84	1	chr11	65836360	65839259	195.52	MACS_peak_5433				MACS_peak_609	5_TSS	-327	65837824	66012218	+	PACS1
chr11	66025081	66025261	MACS_peak_610	89.96	1	chr11	66023855	66026674	151.63	MACS_peak_5436				MACS_peak_610	5_TSS	14	66025174	66035331	+	KLC2_dup2
chr11	66025294	66025543	MACS_peak_611	87.16	1	chr11	66023855	66026674	151.63	MACS_peak_5436				MACS_peak_611	5_TSS	243	66025174	66035331	+	KLC2_dup2
chr11	66025797	66025989	MACS_peak_612	53.58	1	chr11	66023855	66026674	151.63	MACS_peak_5436				MACS_peak_612	5_TSS	725	66025174	66035331	+	KLC2_dup2
chr11	66035058	66035631	MACS_peak_613	213.16	1	chr11	66034284	66037232	213.89	MACS_peak_5437				MACS_peak_613	5_TSS	-863	66036056	66044963	+	RAB1B
chr11	66129164	66129452	MACS_peak_614	92.7	0	0	0	0	0	0				MACS_peak_614	3_TTS	9880	66139291	66129992	-	SLC29A2_dup3
chr11	66133198	66133366	MACS_peak_615	74.31	0	0	0	0	0	0				MACS_peak_615	3_TTS	17772	66115462	66131235	+	LOC102724064
chr11	66133456	66133782	MACS_peak_616	133.88	0	0	0	0	0	0				MACS_peak_616	3_TTS	18093	66115462	66131235	+	LOC102724064
chr11	66134040	66134176	MACS_peak_617	52.41	0	0	0	0	0	0				MACS_peak_617	3_TTS	18671	66115462	66131235	+	LOC102724064
chr11	66247378	66247599	MACS_peak_618	78.99	1	chr11	66245948	66249178	351.96	MACS_peak_5447				MACS_peak_618	5_TSS	-32	66247484	66277130	+	DPP3_dup1
chr11	66405781	66406375	MACS_peak_619	251.85	1	chr11	66404667	66407140	278.7	MACS_peak_5451				MACS_peak_619	5_TSS	17	66406088	66435858	+	RBM4_dup1
chr11	66406407	66406631	MACS_peak_620	56.66	1	chr11	66404667	66407140	278.7	MACS_peak_5451				MACS_peak_620	5_TSS	459	66406088	66435858	+	RBM4_dup1
chr11	66419462	66419603	MACS_peak_621	51.29	0	0	0	0	0	0				MACS_peak_621	3_Proximal	35504	66384053	66413944	+	RBM14-RBM4_dup1
chr11	66435505	66435632	MACS_peak_622	54.56	0	0	0	0	0	0				MACS_peak_622	3_TTS	29460	66406088	66435858	+	RBM4_dup1
chr11	66610353	66610503	MACS_peak_623	51.61	1	chr11	66609670	66612212	303.49	MACS_peak_5460				MACS_peak_623	5_TSS	-444	66610883	66614003	+	RCE1_dup1
chr11	66610837	66611276	MACS_peak_624	161.87	1	chr11	66609670	66612212	303.49	MACS_peak_5460				MACS_peak_624	5_TSS	257	66610883	66614003	+	RCE1_dup1
chr11	67055907	67056350	MACS_peak_625	109.33	1	chr11	67055196	67057283	104.98	MACS_peak_5472				MACS_peak_625	5_TSS	-744	67056762	67069955	+	ANKRD13D_dup1
chr11	67203982	67204100	MACS_peak_626	56.88	0	0	0	0	0	0				MACS_peak_626	Intragenic	1115	67205153	67202981	-	PTPRCAP
chr11	67236489	67236718	MACS_peak_627	50.57	1	chr11	67234894	67237893	316.31	MACS_peak_5485				MACS_peak_627	5_TSS	143	67236748	67231819	-	TMEM134_dup1
chr11	67785315	67785465	MACS_peak_628	58.89	0	0	0	0	0	0				MACS_peak_628	Intragenic	7587	67777775	67796749	+	ALDH3B1_dup1
chr11	67818964	67819108	MACS_peak_629	50.63	0	0	0	0	0	0				MACS_peak_629	3_TTS	12588	67806462	67818366	+	TCIRG1
chr11	67819235	67819403	MACS_peak_630	74.31	0	0	0	0	0	0				MACS_peak_630	3_TTS	12846	67806462	67818366	+	TCIRG1
chr11	67819428	67819710	MACS_peak_631	86.69	0	0	0	0	0	0				MACS_peak_631	3_TTS	69329	67888858	67820326	-	CHKA_dup1
chr11	67838401	67838531	MACS_peak_632	53.82	0	0	0	0	0	0				MACS_peak_632	3_Distal	26224	67812261	67812424	+	MIR6753
chr11	68385736	68385941	MACS_peak_633	59.46	0	0	0	0	0	0				MACS_peak_633	5_Distal	-66089	68451943	68458643	+	GAL
chr11	68671181	68671327	MACS_peak_634	56.48	1	chr11	68670156	68672641	296.15	MACS_peak_5519				MACS_peak_634	5_TSS	87	68671303	68658746	-	MRPL21_dup1
chr11	69327993	69328145	MACS_peak_635	55.94	0	0	0	0	0	0				MACS_peak_635	3_Distal	27768	69300329	69308311	+	LINC01488_dup1
chr11	69457712	69457877	MACS_peak_636	52.7	1	chr11	69451926	69459309	783.01	MACS_peak_5540				MACS_peak_636	Intragenic	1877	69455873	69469242	+	CCND1
chr11	69461526	69461686	MACS_peak_637	57.82	0	0	0	0	0	0				MACS_peak_637	Intragenic	5770	69455873	69469242	+	CCND1
chr11	69462689	69462804	MACS_peak_638	51.49	0	0	0	0	0	0				MACS_peak_638	Intragenic	6881	69455873	69469242	+	CCND1
chr11	69469431	69470474	MACS_peak_639	405.91	1	chr11	69468517	69470772	128.77	MACS_peak_5541				MACS_peak_639	3_TTS	14000	69455873	69469242	+	CCND1
chr11	71218191	71218363	MACS_peak_640	56.48	0	0	0	0	0	0				MACS_peak_640	5_Distal	-20057	71238313	71239210	+	KRTAP5-7
chr11	71935749	71935908	MACS_peak_641	58.27	1	chr11	71933523	71937047	463.11	MACS_peak_5571				MACS_peak_641	5_TSS	-90	71935882	71950188	+	INPPL1
chr11	72391916	72392083	MACS_peak_642	64.65	0	0	0	0	0	0				MACS_peak_642	5_Proximal	-6516	72385497	72287184	-	PDE2A_dup3
chr11	72392244	72392437	MACS_peak_643	98.34	0	0	0	0	0	0				MACS_peak_643	5_Proximal	-6828	72385497	72287184	-	PDE2A_dup3
chr11	72463289	72463452	MACS_peak_644	65.6	1	chr11	72462762	72464500	51.91	MACS_peak_5575				MACS_peak_644	5_TSS	94	72463434	72396114	-	ARAP1_dup2
chr11	72532886	72533191	MACS_peak_645	83.1	0	0	0	0	0	0				MACS_peak_645	Intragenic	7675	72525451	72540680	+	ATG16L2_dup1
chr11	72853294	72853415	MACS_peak_646	50.8	1	chr11	72852060	72854646	274.07	MACS_peak_5579				MACS_peak_646	5_Distal	-75971	72929343	72953472	+	P2RY2_dup1
chr11	74693576	74693697	MACS_peak_647	61.77	0	0	0	0	0	0				MACS_peak_647	5_Proximal	-6324	74699950	74718743	+	NEU3
chr11	74972882	74973003	MACS_peak_648	51.16	0	0	0	0	0	0				MACS_peak_648	3_Distal	20973	74951950	74954749	+	TPBGL
chr11	74973142	74973308	MACS_peak_649	56.48	0	0	0	0	0	0				MACS_peak_649	3_Distal	21259	74951950	74954749	+	TPBGL
chr11	74973476	74973648	MACS_peak_650	73.29	0	0	0	0	0	0				MACS_peak_650	3_Distal	21612	74951950	74954749	+	TPBGL
chr11	77301153	77301409	MACS_peak_651	73.05	1	chr11	77299269	77302023	170.26	MACS_peak_5647				MACS_peak_651	5_TSS	577	77300680	77321401	+	AQP11
chr11	82421112	82421255	MACS_peak_652	50.85	0	0	0	0	0	0				MACS_peak_652	3_Distal	23750	82444906	82443046	-	FAM181B
chr11	82794668	82794818	MACS_peak_653	62.72	0	0	0	0	0	0				MACS_peak_653	3_Proximal	11611	82783108	82784754	+	RAB30-AS1
chr11	82796189	82796295	MACS_peak_654	54.98	0	0	0	0	0	0				MACS_peak_654	3_Distal	13121	82783108	82784754	+	RAB30-AS1
chr11	85417597	85417714	MACS_peak_655	50.26	0	0	0	0	0	0				MACS_peak_655	Intragenic	12559	85430223	85405265	-	SYTL2_dup6
chr11	85875841	85875971	MACS_peak_656	50.82	0	0	0	0	0	0				MACS_peak_656	5_Distal	-79505	85955426	85989852	+	EED_dup1
chr11	88496397	88496532	MACS_peak_657	52.04	0	0	0	0	0	0				MACS_peak_657	Intergenic	258701	88237744	88257222	+	GRM5-AS1
chr11	93049368	93049502	MACS_peak_658	52.87	0	0	0	0	0	0				MACS_peak_658	5_Distal	-14458	93063883	93171636	+	DEUP1
chr11	93462139	93462290	MACS_peak_659	55.11	1	chr11	93460238	93462493	82.57	MACS_peak_5765				MACS_peak_659	3_TTS	1565	93463812	93463681	-	SNORA25
chr11	102710167	102710264	MACS_peak_660	56.52	0	0	0	0	0	0				MACS_peak_660	3_TTS	55807	102654407	102707497	+	WTAPP1
chr11	102869818	102869984	MACS_peak_661	52.02	0	0	0	0	0	0				MACS_peak_661	5_Distal	-43473	102826463	102813721	-	MMP13
chr11	105409259	105409412	MACS_peak_662	51.94	0	0	0	0	0	0				MACS_peak_662	5_Distal	-71509	105480800	105852819	+	GRIA4_dup1
chr11	106539953	106540090	MACS_peak_663	52.18	0	0	0	0	0	0				MACS_peak_663	3_TTS	349122	106889171	106544738	-	GUCY1A2_dup1
chr11	110342756	110342872	MACS_peak_664	50.7	0	0	0	0	0	0				MACS_peak_664	3_Proximal	42139	110300661	110335608	+	FDX1
chr11	111956554	111956845	MACS_peak_665	106.12	1	chr11	111955778	111958603	255.84	MACS_peak_5954				MACS_peak_665	5_TSS	753	111957522	111955539	-	TIMM8B_dup1
chr11	116644002	116644185	MACS_peak_666	68.05	1	chr11	116642427	116645588	307.95	MACS_peak_5997				MACS_peak_666	5_TSS	-402	116643714	116618886	-	BUD13_dup1
chr11	117820438	117820581	MACS_peak_667	50.85	0	0	0	0	0	0				MACS_peak_667	5_Distal	-20345	117800168	117771356	-	TMPRSS13_dup1
chr11	118005251	118005391	MACS_peak_668	61.33	0	0	0	0	0	0				MACS_peak_668	Intragenic	10885	118016184	118004092	-	SCN4B_dup2
chr11	118266146	118266284	MACS_peak_669	51.96	0	0	0	0	0	0				MACS_peak_669	5_Proximal	-5859	118272104	118280562	+	ATP5L_dup1
chr11	118271403	118271613	MACS_peak_670	96.07	1	chr11	118271230	118273945	155.42	MACS_peak_6020				MACS_peak_670	5_TSS	-575	118272104	118280562	+	ATP5L_dup1
chr11	118617223	118617402	MACS_peak_671	65.48	0	0	0	0	0	0				MACS_peak_671	3_TTS	44375	118661657	118618473	-	DDX6
chr11	118617746	118617891	MACS_peak_672	54.59	0	0	0	0	0	0				MACS_peak_672	3_TTS	43811	118661657	118618473	-	DDX6
chr11	118881817	118881962	MACS_peak_673	50.42	0	0	0	0	0	0				MACS_peak_673	3_TTS	7193	118889057	118886422	-	RPS25
chr11	118964557	118964684	MACS_peak_674	64.79	1	chr11	118962593	118964555	75.34	MACS_peak_6037				MACS_peak_674	3_TTS	1543	118966177	118964585	-	H2AFX
chr11	118964717	118965350	MACS_peak_675	273.96	1	chr11	118964136	118967398	291.48	MACS_peak_6038				MACS_peak_675	5_TSS	940	118966177	118964585	-	H2AFX
chr11	124632361	124632620	MACS_peak_676	68.22	1	chr11	124632109	124633932	67.35	MACS_peak_6090				MACS_peak_676	5_TSS	165	124632327	124635816	+	LOC101929340_dup1
chr11	124632632	124633032	MACS_peak_677	148.9	1	chr11	124632109	124633932	67.35	MACS_peak_6090				MACS_peak_677	5_TSS	566	124632327	124635816	+	LOC101929340_dup1
chr11	125495282	125495889	MACS_peak_678	218.39	1	chr11	125494370	125497402	241.35	MACS_peak_6101				MACS_peak_678	5_TSS	242	125495319	125546151	+	CHEK1_dup4
chr11	125545588	125545717	MACS_peak_679	54.07	0	0	0	0	0	0				MACS_peak_679	3_TTS	50599	125495031	125546150	+	CHEK1_dup3
chr11	126138106	126138306	MACS_peak_680	51.93	1	chr11	126137701	126140079	298.26	MACS_peak_6106				MACS_peak_680	5_TSS	635	126138877	126132814	-	SRPRA_dup1
chr11	129489625	129489797	MACS_peak_681	50.81	0	0	0	0	0	0				MACS_peak_681	5_TSS	-2572	129487164	129482016	-	LINC01395
chr11	130139434	130139579	MACS_peak_682	60.09	0	0	0	0	0	0				MACS_peak_682	Intragenic	45125	130184607	130096574	-	ZBTB44_dup1
chr11	130522398	130522514	MACS_peak_683	54.18	0	0	0	0	0	0				MACS_peak_683	5_Distal	-14184	130536630	130536698	+	MIR8052
chr12	2966167	2966340	MACS_peak_684	62.04	0	0	0	0	0	0				MACS_peak_684	5_Distal	-19176	2985424	2998691	+	RHNO1
chr12	2966441	2966625	MACS_peak_685	99.07	0	0	0	0	0	0				MACS_peak_685	5_Distal	-18916	2985424	2998691	+	RHNO1
chr12	2999574	2999775	MACS_peak_686	65.27	0	0	0	0	0	0				MACS_peak_686	5_TSS	-385	3000033	3050306	+	TULP3_dup1
chr12	6315673	6315809	MACS_peak_687	52.41	0	0	0	0	0	0				MACS_peak_687	Intragenic	6232	6309482	6347437	+	CD9_dup1
chr12	6432646	6432844	MACS_peak_688	54.13	0	0	0	0	0	0				MACS_peak_688	Intragenic	10918	6421817	6437672	+	PLEKHG6_dup2
chr12	6504711	6504813	MACS_peak_689	70.59	0	0	0	0	0	0				MACS_peak_689	3_TTS	11569	6493199	6500737	+	LTBR_dup1
chr12	6647771	6647976	MACS_peak_690	61.72	0	0	0	0	0	0				MACS_peak_690	3_TTS	3499	6644385	6647541	+	GAPDH_dup3
chr12	6647995	6648293	MACS_peak_691	117.3	0	0	0	0	0	0				MACS_peak_691	3_TTS	3785	6644385	6647541	+	GAPDH_dup3
chr12	6677167	6677828	MACS_peak_692	251.23	1	chr12	6675800	6678477	149.09	MACS_peak_6275				MACS_peak_692	5_TSS	136	6677498	6666036	-	NOP2_dup1
chr12	6981450	6981617	MACS_peak_693	74.86	1	chr12	6979710	6983585	233.58	MACS_peak_6285				MACS_peak_693	5_TSS	931	6982449	6980100	-	SPSB2
chr12	6981668	6981885	MACS_peak_694	120.86	1	chr12	6979710	6983585	233.58	MACS_peak_6285				MACS_peak_694	5_TSS	701	6982449	6980100	-	SPSB2
chr12	7046427	7047537	MACS_peak_695	1185.47	1	chr12	7045790	7048126	238.27	MACS_peak_6290				MACS_peak_695	5_Proximal	-5678	7052601	7055166	+	C12orf57
chr12	7052041	7052229	MACS_peak_696	75.62	1	chr12	7051951	7054930	375.63	MACS_peak_6291				MACS_peak_696	5_TSS	-483	7052601	7055166	+	C12orf57
chr12	7052499	7052719	MACS_peak_697	70.2	1	chr12	7051951	7054930	375.63	MACS_peak_6291				MACS_peak_697	5_TSS	-27	7052665	7055166	+	C12orf57_dup1
chr12	7076828	7076955	MACS_peak_698	55.33	1	chr12	7069661	7076479	414.69	MACS_peak_6292				MACS_peak_698	5_TSS	-106	7076769	7076500	-	SCARNA12
chr12	7246208	7246334	MACS_peak_699	54.81	0	0	0	0	0	0				MACS_peak_699	5_TSS	-1218	7245043	7187515	-	C1R
chr12	7246751	7246903	MACS_peak_700	68.34	0	0	0	0	0	0				MACS_peak_700	5_TSS	-1756	7245043	7187515	-	C1R
chr12	7246997	7247185	MACS_peak_701	68.11	0	0	0	0	0	0				MACS_peak_701	5_TSS	-2050	7245043	7187515	-	C1R
chr12	7247529	7247707	MACS_peak_702	81.82	0	0	0	0	0	0				MACS_peak_702	5_TSS	-2557	7245043	7187515	-	C1R
chr12	7248886	7249208	MACS_peak_703	123.73	0	0	0	0	0	0				MACS_peak_703	5_TSS	-3919	7245043	7187515	-	C1R
chr12	7282349	7282576	MACS_peak_704	66.53	1	chr12	7281786	7284091	226.49	MACS_peak_6296				MACS_peak_704	5_TSS	166	7282610	7276277	-	RBP5_dup1
chr12	7282595	7282773	MACS_peak_705	94.84	1	chr12	7281786	7284091	226.49	MACS_peak_6296				MACS_peak_705	5_TSS	-72	7282610	7276277	-	RBP5_dup1
chr12	7282922	7283459	MACS_peak_706	187.23	1	chr12	7281786	7284091	226.49	MACS_peak_6296				MACS_peak_706	5_TSS	-741	7282610	7276277	-	RBP5_dup1
chr12	10735551	10735656	MACS_peak_707	58.53	0	0	0	0	0	0				MACS_peak_707	3_Proximal	16827	10752434	10741077	-	KLRA1P
chr12	12510461	12510584	MACS_peak_708	52.65	1	chr12	12508831	12511329	130.08	MACS_peak_6353				MACS_peak_708	5_TSS	-516	12510001	12508342	-	LOH12CR2
chr12	12876677	12876972	MACS_peak_709	102.06	1	chr12	12876244	12880163	582.79	MACS_peak_6367				MACS_peak_709	5_TSS	-2069	12878851	12944399	+	APOLD1
chr12	20164142	20164271	MACS_peak_710	54.07	0	0	0	0	0	0				MACS_peak_710	5_TSS	-3422	20167619	20251802	+	LOC100506393
chr12	29174630	29174792	MACS_peak_711	64.59	0	0	0	0	0	0				MACS_peak_711	Intergenic	-127264	29301936	29488549	+	FAR2
chr12	30330985	30331107	MACS_peak_712	55.82	0	0	0	0	0	0				MACS_peak_712	Intergenic	-393341	29937692	29653746	-	TMTC1_dup1
chr12	32155901	32156051	MACS_peak_713	51.46	0	0	0	0	0	0				MACS_peak_713	3_Proximal	43614	32112353	32146043	+	KIAA1551
chr12	32938210	32938367	MACS_peak_714	57.29	0	0	0	0	0	0				MACS_peak_714	5_Distal	-29410	32908887	32899478	-	YARS2
chr12	46309284	46309419	MACS_peak_715	51.86	0	0	0	0	0	0				MACS_peak_715	3_TTS	75041	46384401	46312914	-	SCAF11
chr12	46330418	46330544	MACS_peak_716	52.81	0	0	0	0	0	0				MACS_peak_716	Intragenic	53903	46384401	46312914	-	SCAF11
chr12	46750904	46751145	MACS_peak_717	58.08	1	chr12	46750312	46752657	79.1	MACS_peak_6656				MACS_peak_717	3_TTS	15609	46766645	46751971	-	SLC38A2_dup1
chr12	46751150	46751630	MACS_peak_718	186.17	1	chr12	46750312	46752657	79.1	MACS_peak_6656				MACS_peak_718	3_TTS	15336	46766645	46751971	-	SLC38A2_dup1
chr12	48678451	48678567	MACS_peak_719	64.59	0	0	0	0	0	0				MACS_peak_719	5_Distal	-44244	48722763	48724062	+	H1FNT
chr12	49080152	49080350	MACS_peak_720	74.1	0	0	0	0	0	0				MACS_peak_720	5_TSS	-4189	49076035	49046995	-	KANSL2
chr12	49412344	49412528	MACS_peak_721	80.93	1	chr12	49410731	49413996	252.4	MACS_peak_6714				MACS_peak_721	5_TSS	133	49412531	49396055	-	PRKAG1
chr12	49412557	49412901	MACS_peak_722	152.86	1	chr12	49410731	49413996	252.4	MACS_peak_6714				MACS_peak_722	5_TSS	-1	49412629	49396055	-	PRKAG1_dup1
chr12	49520744	49521019	MACS_peak_723	137.35	1	chr12	49519864	49521935	91.07	MACS_peak_6718				MACS_peak_723	3_TTS	4460	49525304	49521567	-	TUBA1B
chr12	49667811	49667948	MACS_peak_724	52.18	0	0	0	0	0	0				MACS_peak_724	3_TTS	9112	49658782	49667121	+	TUBA1C_dup4
chr12	49668307	49668528	MACS_peak_725	58.08	0	0	0	0	0	0				MACS_peak_725	3_TTS	9614	49658782	49667121	+	TUBA1C_dup4
chr12	49668551	49668811	MACS_peak_726	73.25	0	0	0	0	0	0				MACS_peak_726	3_TTS	9932	49658782	49667121	+	TUBA1C_dup4
chr12	49668913	49669069	MACS_peak_727	57.52	0	0	0	0	0	0				MACS_peak_727	3_TTS	10211	49658782	49667121	+	TUBA1C_dup4
chr12	51220179	51220329	MACS_peak_728	56.48	0	0	0	0	0	0				MACS_peak_728	5_Distal	-16419	51236701	51281663	+	TMPRSS12
chr12	51477045	51477371	MACS_peak_729	98.98	1	chr12	51476070	51478234	100.52	MACS_peak_6764				MACS_peak_729	5_TSS	306	51477437	51454988	-	CSRNP2
chr12	51949264	51949400	MACS_peak_730	51.42	0	0	0	0	0	0				MACS_peak_730	5_Distal	-35716	51985020	52206648	+	SCN8A_dup1
chr12	52634831	52634963	MACS_peak_731	51.53	0	0	0	0	0	0				MACS_peak_731	Intragenic	7966	52626954	52642709	+	KRT7
chr12	53288917	53289014	MACS_peak_732	53.02	1	chr12	53288236	53291056	251.67	MACS_peak_6813				MACS_peak_732	3_TTS	9904	53298868	53290971	-	KRT8_dup1
chr12	53289303	53289520	MACS_peak_733	50.43	1	chr12	53288236	53291056	251.67	MACS_peak_6813				MACS_peak_733	3_TTS	9473	53298868	53290971	-	KRT8_dup1
chr12	53289681	53289928	MACS_peak_734	54.32	1	chr12	53288236	53291056	251.67	MACS_peak_6813				MACS_peak_734	3_TTS	9042	53298868	53290971	-	KRT8_dup1
chr12	53296964	53297107	MACS_peak_735	54.87	1	chr12	53296294	53298901	191.75	MACS_peak_6814				MACS_peak_735	Intragenic	1831	53298868	53290971	-	KRT8_dup1
chr12	53347349	53347512	MACS_peak_736	75.62	1	chr12	53346219	53348487	159.18	MACS_peak_6823				MACS_peak_736	5_TSS	-3812	53343650	53290971	-	KRT8_dup3
chr12	53440398	53440713	MACS_peak_737	90.52	1	chr12	53439640	53441615	72.7	MACS_peak_6828				MACS_peak_737	5_TSS	-146	53440810	53458162	+	TNS2
chr12	53440818	53441016	MACS_peak_738	51.02	1	chr12	53439640	53441615	72.7	MACS_peak_6828				MACS_peak_738	5_TSS	64	53440810	53458162	+	TNS2
chr12	53441300	53441486	MACS_peak_739	56.86	1	chr12	53440626	53443364	183.56	MACS_peak_6829				MACS_peak_739	5_TSS	603	53440810	53458162	+	TNS2
chr12	53441653	53441798	MACS_peak_740	55.01	1	chr12	53440626	53443364	183.56	MACS_peak_6829				MACS_peak_740	5_TSS	940	53440810	53458162	+	TNS2
chr12	53586724	53586934	MACS_peak_741	74.07	0	0	0	0	0	0				MACS_peak_741	5_Distal	-12107	53574693	53551447	-	CSAD
chr12	53587024	53587222	MACS_peak_742	96.92	0	0	0	0	0	0				MACS_peak_742	5_Distal	-12420	53574693	53551447	-	CSAD
chr12	53693408	53693867	MACS_peak_743	164.58	1	chr12	53692476	53694407	86.06	MACS_peak_6840				MACS_peak_743	5_TSS	255	53693470	53700965	+	C12orf10
chr12	53845711	53845945	MACS_peak_744	71.44	1	chr12	53844694	53847862	172.7	MACS_peak_6848				MACS_peak_744	5_TSS	-34	53845886	53874946	+	PCBP2_dup1
chr12	53846127	53846278	MACS_peak_745	51.23	1	chr12	53844694	53847862	172.7	MACS_peak_6848				MACS_peak_745	5_TSS	325	53845886	53874946	+	PCBP2_dup1
chr12	54101839	54101988	MACS_peak_746	58.48	0	0	0	0	0	0				MACS_peak_746	3_TTS	19424	54121307	54104902	-	CALCOCO1_dup1
chr12	54981869	54981995	MACS_peak_747	54.81	0	0	0	0	0	0				MACS_peak_747	5_TSS	539	54982443	54973024	-	PPP1R1A
chr12	56390740	56391140	MACS_peak_748	81.31	0	0	0	0	0	0				MACS_peak_748	5_TSS	-157	56391043	56399309	+	SUOX_dup1
chr12	56498071	56498252	MACS_peak_749	59.46	1	chr12	56496935	56499629	156.72	MACS_peak_6899				MACS_peak_749	5_TSS	67	56498103	56507694	+	PA2G4
chr12	56511859	56512089	MACS_peak_750	178.4	1	chr12	56510967	56513103	280.1	MACS_peak_6901				MACS_peak_750	5_TSS	-87	56512004	56516280	+	ZC3H10_dup1
chr12	56512102	56512272	MACS_peak_751	54.5	1	chr12	56510967	56513103	280.1	MACS_peak_6901				MACS_peak_751	5_TSS	-157	56512344	56516280	+	ZC3H10_dup2
chr12	56552313	56552497	MACS_peak_752	70.39	1	chr12	56550804	56553660	295.85	MACS_peak_6905				MACS_peak_752	5_TSS	335	56552045	56555366	+	MYL6_dup1
chr12	56553499	56553641	MACS_peak_753	64.85	1	chr12	56550804	56553660	295.85	MACS_peak_6905				MACS_peak_753	3_TTS	7339	56546204	56551771	+	MYL6B_dup1
chr12	56596880	56596994	MACS_peak_754	68.67	0	0	0	0	0	0				MACS_peak_754	5_Distal	-13590	56583358	56556143	-	SMARCC2_dup1
chr12	56694075	56694373	MACS_peak_755	77.09	1	chr12	56692642	56695399	190.61	MACS_peak_6911				MACS_peak_755	5_TSS	54	56694175	56665483	-	CS
chr12	57023819	57024095	MACS_peak_756	71.44	1	chr12	57022321	57025062	208.65	MACS_peak_6918				MACS_peak_756	5_TSS	159	57024115	56989380	-	BAZ2A
chr12	57630091	57630248	MACS_peak_757	53.51	0	0	0	0	0	0				MACS_peak_757	3_TTS	6845	57623356	57628718	+	SHMT2_dup1
chr12	57913524	57914171	MACS_peak_758	283.48	1	chr12	57912658	57915416	354.69	MACS_peak_6939				MACS_peak_758	5_TSS	-845	57913042	57912948	-	MIR616
chr12	58139071	58139358	MACS_peak_759	104.24	1	chr12	58137366	58140094	610.99	MACS_peak_6945				MACS_peak_759	5_TSS	413	58138772	58142026	+	TSPAN31_dup1
chr12	62898585	62898717	MACS_peak_760	50.15	0	0	0	0	0	0				MACS_peak_760	Intragenic	38017	62860597	62991363	+	MON2_dup1
chr12	62997190	62997447	MACS_peak_761	69.09	1	chr12	62995166	62998679	487.49	MACS_peak_6985				MACS_peak_761	5_TSS	-149	62997466	62997549	+	MIRLET7I
chr12	64845108	64846011	MACS_peak_762	323.38	1	chr12	64844509	64847012	255.25	MACS_peak_7021				MACS_peak_762	5_TSS	-249	64845840	64895899	+	TBK1
chr12	65174491	65174632	MACS_peak_763	51.29	1	chr12	65173130	65175584	208.7	MACS_peak_7032				MACS_peak_763	5_Distal	-21356	65153226	65107222	-	GNS
chr12	65294261	65294393	MACS_peak_764	50.34	0	0	0	0	0	0				MACS_peak_764	3_Distal	141027	65153277	65274798	+	TBC1D30
chr12	69139834	69140025	MACS_peak_765	59.78	1	chr12	69138831	69141572	141.22	MACS_peak_7098				MACS_peak_765	5_TSS	-14	69139936	69159853	+	SLC35E3
chr12	69241796	69241957	MACS_peak_766	66.08	0	0	0	0	0	0				MACS_peak_766	3_TTS	39075	69202797	69239324	+	MDM2_dup2
chr12	69677880	69678069	MACS_peak_767	71.68	0	0	0	0	0	0				MACS_peak_767	5_Distal	-11023	69666998	69666937	-	MIR1279
chr12	69679861	69679997	MACS_peak_768	51.42	0	0	0	0	0	0				MACS_peak_768	5_Distal	-12953	69666998	69666937	-	MIR1279
chr12	70146375	70146532	MACS_peak_769	55.71	0	0	0	0	0	0				MACS_peak_769	5_Distal	-14148	70132348	70107413	-	LOC101928002
chr12	71997162	71997291	MACS_peak_770	55.34	0	0	0	0	0	0				MACS_peak_770	5_Distal	-60451	72057677	72074428	+	THAP2
chr12	76425756	76426020	MACS_peak_771	109.12	1	chr12	76423290	76426757	371.46	MACS_peak_7198				MACS_peak_771	5_TSS	-358	76425556	76419227	-	PHLDA1
chr12	76430886	76431073	MACS_peak_772	53.58	1	chr12	76430249	76432284	67.34	MACS_peak_7199				MACS_peak_772	5_Proximal	-5416	76425556	76419227	-	PHLDA1
chr12	77635801	77635945	MACS_peak_773	50.63	0	0	0	0	0	0				MACS_peak_773	Intergenic	-176518	77459360	77415026	-	E2F7
chr12	89581451	89581609	MACS_peak_774	50.26	0	0	0	0	0	0				MACS_peak_774	Intergenic	165137	89746636	89741602	-	DUSP6_dup1
chr12	91887123	91887290	MACS_peak_775	63.12	0	0	0	0	0	0				MACS_peak_775	Intergenic	-314745	91572423	91537054	-	DCN_dup1
chr12	93444875	93445012	MACS_peak_776	51.47	0	0	0	0	0	0				MACS_peak_776	Intragenic	326547	93771512	93397534	-	LOC643339
chr12	93799138	93799508	MACS_peak_777	99.3	0	0	0	0	0	0				MACS_peak_777	3_TTS	26986	93772326	93797024	+	NUDT4_dup2
chr12	93801005	93801209	MACS_peak_778	64.61	0	0	0	0	0	0				MACS_peak_778	3_TTS	28762	93772326	93797024	+	NUDT4_dup2
chr12	93801225	93801390	MACS_peak_779	72.78	0	0	0	0	0	0				MACS_peak_779	3_TTS	29015	93772326	93797024	+	NUDT4_dup2
chr12	96594236	96594384	MACS_peak_780	55.34	0	0	0	0	0	0				MACS_peak_780	Intragenic	6145	96588160	96663613	+	ELK3
chr12	100738848	100738979	MACS_peak_781	52.04	0	0	0	0	0	0				MACS_peak_781	5_Distal	-11946	100750857	100815837	+	SLC17A8_dup1
chr12	104350815	104351025	MACS_peak_782	55.35	1	chr12	104349883	104352149	242.91	MACS_peak_7511				MACS_peak_782	5_TSS	82	104350993	104343981	-	C12orf73
chr12	104956241	104956354	MACS_peak_783	68.99	0	0	0	0	0	0				MACS_peak_783	5_Distal	-29094	104985411	104985494	+	MIR3922
chr12	105451706	105451858	MACS_peak_784	55.06	0	0	0	0	0	0				MACS_peak_784	Intragenic	26577	105478341	105413562	-	ALDH1L2_dup1
chr12	109032861	109033122	MACS_peak_785	85.6	0	0	0	0	0	0				MACS_peak_785	3_TTS	3322	109029586	109029646	+	MIR4496
chr12	109633234	109633379	MACS_peak_786	50.42	0	0	0	0	0	0				MACS_peak_786	Intragenic	56078	109577202	109706030	+	ACACB
chr12	110790092	110790273	MACS_peak_787	67.3	0	0	0	0	0	0				MACS_peak_787	3_TTS	71108	110719032	110788897	+	ATP2A2_dup1
chr12	110791200	110791440	MACS_peak_788	88.08	0	0	0	0	0	0				MACS_peak_788	3_TTS	72284	110719032	110788897	+	ATP2A2_dup1
chr12	111152940	111153072	MACS_peak_789	53.35	0	0	0	0	0	0				MACS_peak_789	5_Distal	-25407	111127617	111086491	-	HVCN1_dup1
chr12	111154485	111154664	MACS_peak_790	52.74	0	0	0	0	0	0				MACS_peak_790	3_TTS	26228	111180783	111157613	-	PPP1CC_dup1
chr12	111797850	111797986	MACS_peak_791	52.04	0	0	0	0	0	0				MACS_peak_791	3_TTS	9031	111806925	111798455	-	FAM109A_dup1
chr12	112841713	112841856	MACS_peak_792	60.58	0	0	0	0	0	0				MACS_peak_792	3_TTS	5337	112847123	112842985	-	RPL6_dup4
chr12	115277338	115277479	MACS_peak_793	51.29	0	0	0	0	0	0				MACS_peak_793	Intergenic	-155407	115121969	115108059	-	TBX3_dup1
chr12	117586657	117586787	MACS_peak_794	52	0	0	0	0	0	0				MACS_peak_794	Intragenic	41603	117628300	117581585	-	FBXO21_dup1
chr12	120156402	120156555	MACS_peak_795	58.2	0	0	0	0	0	0				MACS_peak_795	5_TSS	-4946	120151529	120151439	-	MIR1178
chr12	120632430	120632955	MACS_peak_796	159.42	1	chr12	120631212	120634057	333.91	MACS_peak_7728				MACS_peak_796	5_TSS	-192	120632513	120565014	-	GCN1
chr12	120633824	120634033	MACS_peak_797	73.05	1	chr12	120631212	120634057	333.91	MACS_peak_7728				MACS_peak_797	5_TSS	-1377	120632513	120565014	-	GCN1
chr12	120884118	120884285	MACS_peak_798	55.22	1	chr12	120883031	120885220	249.24	MACS_peak_7738				MACS_peak_798	5_TSS	49	120884215	120881764	-	TRIAP1
chr12	121013818	121013924	MACS_peak_799	59.28	0	0	0	0	0	0				MACS_peak_799	3_TTS	5344	121019197	121016848	-	POP5
chr12	121018568	121019368	MACS_peak_800	414.63	1	chr12	121017800	121020821	179.45	MACS_peak_7745				MACS_peak_800	5_TSS	208	121019197	121016848	-	POP5
chr12	122690385	122690531	MACS_peak_801	50.21	0	0	0	0	0	0				MACS_peak_801	3_TTS	20682	122711115	122692209	-	DIABLO_dup1
chr12	122690548	122690687	MACS_peak_802	51.73	0	0	0	0	0	0				MACS_peak_802	3_TTS	20472	122711115	122692209	-	DIABLO_dup1
chr12	122690783	122691032	MACS_peak_803	93.9	0	0	0	0	0	0				MACS_peak_803	3_TTS	20185	122711115	122692209	-	DIABLO_dup1
chr12	122691301	122691460	MACS_peak_804	66.57	0	0	0	0	0	0				MACS_peak_804	3_TTS	19767	122711115	122692209	-	DIABLO_dup1
chr12	122985829	122985971	MACS_peak_805	53.34	1	chr12	122983948	122986469	213.74	MACS_peak_7798				MACS_peak_805	5_TSS	-305	122985620	122956146	-	ZCCHC8
chr12	123346431	123346567	MACS_peak_806	52.26	0	0	0	0	0	0				MACS_peak_806	3_TTS	26485	123319985	123342447	+	HIP1R_dup1
chr12	123460104	123460256	MACS_peak_807	52.39	1	chr12	123458253	123460882	171.98	MACS_peak_7809				MACS_peak_807	5_TSS	433	123459750	123464588	+	OGFOD2_dup6
chr12	123464757	123465452	MACS_peak_808	226.65	1	chr12	123463922	123466444	203.38	MACS_peak_7810				MACS_peak_808	5_TSS	328	123464607	123467460	+	ARL6IP4_dup1
chr12	123465638	123465817	MACS_peak_809	69.06	1	chr12	123463922	123466444	203.38	MACS_peak_7810				MACS_peak_809	3_TTS	6472	123459250	123464588	+	OGFOD2_dup1
chr12	123636166	123636310	MACS_peak_810	76.81	0	0	0	0	0	0				MACS_peak_810	5_Distal	-41213	123595036	123468027	-	PITPNM2
chr12	123873313	123873523	MACS_peak_811	88.08	1	chr12	123872493	123874065	50.58	MACS_peak_7814				MACS_peak_811	5_TSS	-2463	123875822	123893900	+	KMT5A_dup4
chr12	124086455	124086687	MACS_peak_812	122.22	1	chr12	124085473	124087721	267.27	MACS_peak_7820				MACS_peak_812	5_TSS	-43	124086624	124105490	+	DDX55_dup1
chr12	124806795	124806965	MACS_peak_813	63.96	0	0	0	0	0	0				MACS_peak_813	3_TTS	245111	125052010	124808957	-	NCOR2_dup1
chr12	125394326	125394921	MACS_peak_814	257.01	1	chr12	125393703	125395988	89.56	MACS_peak_7847				MACS_peak_814	3_TTS	5216	125399587	125396191	-	UBC
chr12	125395063	125395395	MACS_peak_815	69.03	1	chr12	125393703	125395988	89.56	MACS_peak_7847				MACS_peak_815	3_TTS	4406	125399587	125396191	-	UBC
chr12	131361827	131362005	MACS_peak_816	52.64	0	0	0	0	0	0				MACS_peak_816	3_TTS	5363	131356539	131362223	+	RAN_dup1
chr12	131362499	131362870	MACS_peak_817	142.42	0	0	0	0	0	0				MACS_peak_817	3_TTS	6045	131356539	131362223	+	RAN_dup1
chr12	131362910	131363036	MACS_peak_818	52.04	0	0	0	0	0	0				MACS_peak_818	3_TTS	6419	131356539	131362223	+	RAN_dup1
chr12	132195615	132195938	MACS_peak_819	101.4	1	chr12	132194126	132196698	401.83	MACS_peak_7868				MACS_peak_819	5_TSS	64	132195632	132284283	+	SFSWAP_dup1
chr12	133136609	133136745	MACS_peak_820	52.41	1	chr12	133135927	133138560	178.15	MACS_peak_7882				MACS_peak_820	5_Distal	-21932	133158583	133158647	+	MIR6763
chr12	133136913	133137147	MACS_peak_821	78.99	1	chr12	133135927	133138560	178.15	MACS_peak_7882				MACS_peak_821	5_Distal	-21571	133158583	133158647	+	MIR6763
chr12	133196399	133196546	MACS_peak_822	59.6	0	0	0	0	0	0				MACS_peak_822	Intragenic	1077	133195366	133198972	+	P2RX2_dup1
chr12	133196806	133196951	MACS_peak_823	50.42	0	0	0	0	0	0				MACS_peak_823	Intragenic	1539	133195366	133198972	+	P2RX2_dup1
chr12	133197758	133197898	MACS_peak_824	51.51	0	0	0	0	0	0				MACS_peak_824	Intragenic	2491	133195366	133198972	+	P2RX2_dup1
chr13	20207590	20207940	MACS_peak_825	86.97	1	chr13	20206462	20209104	206.56	MACS_peak_7894				MACS_peak_825	5_TSS	-58	20207788	20247599	+	MPHOSPH8
chr13	21300162	21300334	MACS_peak_826	75.51	0	0	0	0	0	0				MACS_peak_826	3_TTS	22759	21277482	21297237	+	IL17D
chr13	21347615	21348184	MACS_peak_827	214.23	1	chr13	21346468	21348890	257.59	MACS_peak_7909				MACS_peak_827	5_TSS	297	21348097	21303070	-	EEF1AKMT1_dup1
chr13	21571479	21571597	MACS_peak_828	50.17	0	0	0	0	0	0				MACS_peak_828	5_Distal	-47983	21523567	21512703	-	LINC00367
chr13	24152808	24153039	MACS_peak_829	53.13	1	chr13	24151626	24155326	380.27	MACS_peak_7943				MACS_peak_829	5_TSS	-573	24153499	24243412	+	TNFRSF19_dup2
chr13	24153350	24154202	MACS_peak_830	487.41	1	chr13	24151626	24155326	380.27	MACS_peak_7943				MACS_peak_830	5_TSS	118	24153499	24243412	+	TNFRSF19_dup2
chr13	25141367	25141493	MACS_peak_831	52.04	0	0	0	0	0	0				MACS_peak_831	5_Distal	-12904	25154346	25171812	+	TPTE2P6
chr13	26760544	26760696	MACS_peak_832	64.93	1	chr13	26759878	26761775	80.89	MACS_peak_7975				MACS_peak_832	3_Distal	35246	26795894	26786905	-	RNF6_dup3
chr13	27832719	27832895	MACS_peak_833	56.48	0	0	0	0	0	0				MACS_peak_833	3_TTS	3285	27829538	27829663	+	SNORA27
chr13	27833476	27833746	MACS_peak_834	90.82	0	0	0	0	0	0				MACS_peak_834	3_TTS	4015	27829538	27829663	+	SNORA27
chr13	27835217	27835445	MACS_peak_835	62.69	0	0	0	0	0	0				MACS_peak_835	3_TTS	9650	27825692	27830702	+	RPL21
chr13	28195983	28196258	MACS_peak_836	50.43	1	chr13	28192582	28197203	821.54	MACS_peak_7997				MACS_peak_836	5_TSS	114	28195916	28241559	+	POLR1D_dup1
chr13	30867759	30867973	MACS_peak_837	51.02	0	0	0	0	0	0				MACS_peak_837	3_Distal	80192	30948051	30914403	-	LINC00426
chr13	31031005	31031241	MACS_peak_838	57.26	0	0	0	0	0	0				MACS_peak_838	3_TTS	7323	31038464	31032053	-	HMGB1_dup2
chr13	31705967	31706271	MACS_peak_839	99.36	0	0	0	0	0	0				MACS_peak_839	3_TTS	30022	31736158	31709111	-	HSPH1_dup1
chr13	35602851	35602953	MACS_peak_840	53.02	0	0	0	0	0	0				MACS_peak_840	Intragenic	86483	35516424	36246873	+	NBEA
chr13	37575676	37575838	MACS_peak_841	72.35	1	chr13	37573617	37576663	204.35	MACS_peak_8090				MACS_peak_841	3_Proximal	58132	37633850	37583451	-	SUPT20H_dup1
chr13	41746760	41746914	MACS_peak_842	54.39	0	0	0	0	0	0				MACS_peak_842	3_Distal	21873	41768711	41765541	-	KBTBD7
chr13	42621677	42622103	MACS_peak_843	60.64	1	chr13	42620775	42624359	258.35	MACS_peak_8155				MACS_peak_843	5_TSS	-981	42622844	42817033	+	DGKH_dup1
chr13	43685155	43685388	MACS_peak_844	57.26	0	0	0	0	0	0				MACS_peak_844	5_TSS	-2015	43687301	43733602	+	LINC00400
chr13	43795062	43795217	MACS_peak_845	55.24	0	0	0	0	0	0				MACS_peak_845	3_Distal	107868	43687301	43733602	+	LINC00400
chr13	45433385	45433591	MACS_peak_846	54.49	0	0	0	0	0	0				MACS_peak_846	5_Distal	-49756	45383766	45373640	-	LINC00330
chr13	45446411	45446558	MACS_peak_847	52.92	0	0	0	0	0	0				MACS_peak_847	5_Distal	-62744	45383766	45373640	-	LINC00330
chr13	45875841	45875985	MACS_peak_848	64.31	0	0	0	0	0	0				MACS_peak_848	3_Distal	34645	45910582	45910449	-	SNORA31B
chr13	45906348	45906539	MACS_peak_849	51.59	1	chr13	45904763	45907890	140.41	MACS_peak_8216				MACS_peak_849	3_TTS	4131	45910582	45910449	-	SNORA31B
chr13	45906969	45907221	MACS_peak_850	83.09	1	chr13	45904763	45907890	140.41	MACS_peak_8216				MACS_peak_850	3_TTS	3411	45910582	45910449	-	SNORA31B
chr13	45909484	45909687	MACS_peak_851	62.71	1	chr13	45907133	45910326	117.53	MACS_peak_8217				MACS_peak_851	3_TTS	1034	45910582	45910449	-	SNORA31B
chr13	45909946	45910193	MACS_peak_852	66.08	1	chr13	45907133	45910326	117.53	MACS_peak_8217				MACS_peak_852	5_TSS	512	45910582	45910449	-	SNORA31B
chr13	45910499	45910707	MACS_peak_853	59.46	1	chr13	45907133	45910326	117.53	MACS_peak_8217				MACS_peak_853	5_TSS	-48	45910582	45910449	-	SNORA31B
chr13	47328631	47328989	MACS_peak_854	79.74	0	0	0	0	0	0				MACS_peak_854	3_TTS	201422	47127296	47327175	+	LRCH1_dup2
chr13	48010888	48011032	MACS_peak_855	56.94	0	0	0	0	0	0				MACS_peak_855	Intergenic	495816	48506757	48504288	-	LINC00562
chr13	48575313	48575471	MACS_peak_856	62.28	1	chr13	48574267	48577545	259.34	MACS_peak_8259				MACS_peak_856	5_Distal	-36311	48611703	48615638	+	NUDT15_dup3
chr13	50570546	50570727	MACS_peak_857	51.93	1	chr13	50569375	50572988	415.55	MACS_peak_8291				MACS_peak_857	5_TSS	38	50570637	50570551	-	MIR3613
chr13	59315907	59316063	MACS_peak_858	50.12	0	0	0	0	0	0				MACS_peak_858	Intergenic	-508700	58807251	58785831	-	LINC00374
chr13	65601252	65601399	MACS_peak_859	50.66	0	0	0	0	0	0				MACS_peak_859	Intergenic	-838828	66440179	66452351	+	LINC01052
chr13	71103498	71103610	MACS_peak_860	50.44	0	0	0	0	0	0				MACS_peak_860	Intergenic	-420937	70682625	70274725	-	KLHL1_dup1
chr13	73731678	73731825	MACS_peak_861	52.15	0	0	0	0	0	0				MACS_peak_861	3_Distal	98850	73632930	73651680	+	KLF5_dup1
chr13	79882412	79882584	MACS_peak_862	65.48	0	0	0	0	0	0				MACS_peak_862	3_Distal	97885	79980356	79893003	-	RBM26_dup1
chr13	85476457	85476575	MACS_peak_863	53.84	1	chr13	85476386	85478304	146.11	MACS_peak_8469				MACS_peak_863	Intergenic	118711	85357789	85357913	+	SNORA107
chr13	91075672	91075809	MACS_peak_864	50.96	0	0	0	0	0	0				MACS_peak_864	5_Distal	-69793	91145542	91187595	+	LINC01049
chr13	92010686	92010943	MACS_peak_865	72.88	0	0	0	0	0	0				MACS_peak_865	3_TTS	10779	92000074	92006829	+	MIR17HG_dup1
chr13	92012365	92013000	MACS_peak_866	172.81	0	0	0	0	0	0				MACS_peak_866	3_Proximal	9136	92003568	92003645	+	MIR92A1
chr13	92537668	92537799	MACS_peak_867	53.58	0	0	0	0	0	0				MACS_peak_867	Intergenic	466702	93004460	92992047	-	GPC5-AS2
chr13	92613011	92613161	MACS_peak_868	57.77	0	0	0	0	0	0				MACS_peak_868	Intergenic	391349	93004460	92992047	-	GPC5-AS2
chr13	94843600	94843764	MACS_peak_869	54.23	0	0	0	0	0	0				MACS_peak_869	5_TSS	-3447	94840245	94806447	-	GPC6-AS1
chr13	95288734	95288866	MACS_peak_870	55.11	0	0	0	0	0	0				MACS_peak_870	3_TTS	34674	95254104	95286899	+	GPR180
chr13	99095967	99096108	MACS_peak_871	50.43	0	0	0	0	0	0				MACS_peak_871	3_Proximal	78367	99174379	99102453	-	STK24
chr13	99096428	99096573	MACS_peak_872	50.24	0	0	0	0	0	0				MACS_peak_872	3_Proximal	77852	99174379	99102453	-	STK24
chr13	99097689	99098175	MACS_peak_873	120.04	0	0	0	0	0	0				MACS_peak_873	3_TTS	76526	99174379	99102453	-	STK24
chr13	99098295	99098619	MACS_peak_874	122.73	0	0	0	0	0	0				MACS_peak_874	3_TTS	75896	99174379	99102453	-	STK24
chr13	99098695	99098885	MACS_peak_875	53.11	0	0	0	0	0	0				MACS_peak_875	3_TTS	75609	99174379	99102453	-	STK24
chr13	99098919	99099288	MACS_peak_876	90.22	0	0	0	0	0	0				MACS_peak_876	3_TTS	75190	99174379	99102453	-	STK24
chr13	99466397	99466534	MACS_peak_877	52.18	0	0	0	0	0	0				MACS_peak_877	5_Distal	-17865	99484338	99486883	+	DOCK9-AS1
chr13	99739345	99739472	MACS_peak_878	52.04	1	chr13	99738750	99741539	169.06	MACS_peak_8586				MACS_peak_878	5_TSS	416	99738977	99740879	+	DOCK9-AS2
chr13	100288738	100288890	MACS_peak_879	51.78	0	0	0	0	0	0				MACS_peak_879	5_Proximal	-6466	100295313	100295403	+	MIR4306
chr13	103498021	103498361	MACS_peak_880	109.72	1	chr13	103496891	103500671	413.51	MACS_peak_8623				MACS_peak_880	5_TSS	25	103498191	103528351	+	ERCC5
chr13	104138512	104138662	MACS_peak_881	53.23	0	0	0	0	0	0				MACS_peak_881	3_Distal	61006	104077550	104080035	+	LINC01309
chr13	104151162	104151308	MACS_peak_882	56.02	0	0	0	0	0	0				MACS_peak_882	3_Distal	73660	104077550	104080035	+	LINC01309
chr13	105176928	105177045	MACS_peak_883	52.76	0	0	0	0	0	0				MACS_peak_883	Intergenic	-941213	106118216	106143383	+	DAOA
chr13	106500347	106500553	MACS_peak_884	51.93	0	0	0	0	0	0				MACS_peak_884	3_Distal	141283	106359179	106414145	+	LINC00343_dup1
chr13	107188362	107188916	MACS_peak_885	287.67	1	chr13	107187041	107189916	344.2	MACS_peak_8659				MACS_peak_885	5_TSS	-1268	107187388	107142079	-	EFNB2
chr13	107189676	107189965	MACS_peak_886	65.83	1	chr13	107187041	107189916	344.2	MACS_peak_8659				MACS_peak_886	5_TSS	-2332	107187388	107142079	-	EFNB2
chr13	108524027	108524151	MACS_peak_887	52.7	0	0	0	0	0	0				MACS_peak_887	5_Distal	-36263	108487806	108439709	-	FAM155A-IT1
chr13	111222093	111222252	MACS_peak_888	53.29	0	0	0	0	0	0				MACS_peak_888	5_Proximal	-8113	111214084	111175413	-	RAB20
chr13	111223412	111223561	MACS_peak_889	54.48	0	0	0	0	0	0				MACS_peak_889	5_Proximal	-9437	111214084	111175413	-	RAB20
chr13	111290974	111291166	MACS_peak_890	60.97	0	0	0	0	0	0				MACS_peak_890	Intragenic	23126	111267931	111292342	+	NAXD_dup4
chr13	111538323	111538622	MACS_peak_891	76.87	0	0	0	0	0	0				MACS_peak_891	5_Distal	-15714	111522655	111516334	-	LINC00346
chr13	111539441	111539663	MACS_peak_892	74.42	0	0	0	0	0	0				MACS_peak_892	5_Distal	-16893	111522655	111516334	-	LINC00346
chr13	111539687	111539878	MACS_peak_893	52.56	0	0	0	0	0	0				MACS_peak_893	5_Distal	-17143	111522655	111516334	-	LINC00346
chr13	111540238	111540554	MACS_peak_894	88.74	0	0	0	0	0	0				MACS_peak_894	5_Distal	-17705	111522655	111516334	-	LINC00346
chr13	111568068	111568357	MACS_peak_895	67.89	1	chr13	111564988	111569190	299.77	MACS_peak_8733				MACS_peak_895	5_TSS	-800	111567454	111530887	-	ANKRD10_dup1
chr13	113349151	113349283	MACS_peak_896	52.89	0	0	0	0	0	0				MACS_peak_896	3_Distal	47884	113301358	113338811	+	ATP11AUN
chr13	113542097	113542271	MACS_peak_897	57.92	0	0	0	0	0	0				MACS_peak_897	3_TTS	197535	113344643	113541482	+	ATP11A_dup1
chr13	113542752	113543119	MACS_peak_898	110.27	0	0	0	0	0	0				MACS_peak_898	3_TTS	198218	113344643	113541482	+	ATP11A_dup1
chr13	113667687	113668012	MACS_peak_899	88.35	1	chr13	113666930	113668667	56.37	MACS_peak_8750				MACS_peak_899	5_Distal	-44783	113622952	113621798	-	MCF2L-AS1
chr13	113668639	113668813	MACS_peak_900	59.28	1	chr13	113666930	113668667	56.37	MACS_peak_8750				MACS_peak_900	5_Distal	-45787	113622952	113621798	-	MCF2L-AS1
chr13	113862946	113863358	MACS_peak_901	72.96	1	chr13	113861632	113865888	508.82	MACS_peak_8754				MACS_peak_901	5_TSS	-107	113862962	113831853	-	PCID2_dup1
chr13	113951373	113951650	MACS_peak_902	84.52	1	chr13	113950270	113952761	316.18	MACS_peak_8755				MACS_peak_902	5_TSS	-48	113951469	113977741	+	LAMP1
chr13	113987241	113987372	MACS_peak_903	50.58	0	0	0	0	0	0				MACS_peak_903	5_Distal	-18666	114005988	114016182	+	GRTP1-AS1_dup1
chr14	21665494	21665747	MACS_peak_904	80.2	0	0	0	0	0	0				MACS_peak_904	3_TTS	8066	21673662	21668238	-	LINC00641
chr14	21665977	21666120	MACS_peak_905	69.03	0	0	0	0	0	0				MACS_peak_905	3_TTS	7605	21673662	21668238	-	LINC00641
chr14	21666268	21666423	MACS_peak_906	55.81	0	0	0	0	0	0				MACS_peak_906	3_TTS	7356	21673662	21668238	-	LINC00641
chr14	21667104	21667321	MACS_peak_907	70.88	0	0	0	0	0	0				MACS_peak_907	3_TTS	6482	21673662	21668238	-	LINC00641
chr14	21669469	21669664	MACS_peak_908	56.27	0	0	0	0	0	0				MACS_peak_908	Intragenic	4100	21673662	21668238	-	LINC00641
chr14	21669677	21669815	MACS_peak_909	53.22	0	0	0	0	0	0				MACS_peak_909	Intragenic	3919	21673662	21668238	-	LINC00641
chr14	21817849	21818101	MACS_peak_910	91.79	0	0	0	0	0	0				MACS_peak_910	3_TTS	34413	21852425	21819631	-	SUPT16H
chr14	21905049	21905765	MACS_peak_911	317.99	1	chr14	21904012	21906484	187.49	MACS_peak_8797				MACS_peak_911	5_TSS	73	21905457	21853353	-	CHD8
chr14	21971743	21971920	MACS_peak_912	53.04	0	0	0	0	0	0				MACS_peak_912	3_TTS	26511	21945335	21967321	+	TOX4_dup1
chr14	23305547	23305764	MACS_peak_913	55.64	1	chr14	23304572	23308205	247.48	MACS_peak_8838				MACS_peak_913	5_TSS	-101	23305742	23316808	+	MMP14
chr14	23305780	23306034	MACS_peak_914	121.21	1	chr14	23304572	23308205	247.48	MACS_peak_8838				MACS_peak_914	5_TSS	102	23305742	23316808	+	MMP14
chr14	23351803	23351964	MACS_peak_915	54.57	0	0	0	0	0	0				MACS_peak_915	5_TSS	-590	23352432	23356889	+	REM2
chr14	23435575	23436228	MACS_peak_916	160.2	0	0	0	0	0	0				MACS_peak_916	5_Proximal	-9741	23426351	23415437	-	HAUS4_dup1
chr14	23436242	23436508	MACS_peak_917	69.66	0	0	0	0	0	0				MACS_peak_917	5_Distal	-10021	23426351	23415437	-	HAUS4_dup1
chr14	23488397	23488565	MACS_peak_918	50.77	0	0	0	0	0	0				MACS_peak_918	5_Proximal	-9076	23479410	23456110	-	C14orf93_dup1
chr14	23526860	23527610	MACS_peak_919	291.92	1	chr14	23525744	23528494	94.91	MACS_peak_8850				MACS_peak_919	5_TSS	-553	23526747	23516270	-	CDH24_dup1
chr14	23540269	23540967	MACS_peak_920	223.95	1	chr14	23539320	23541809	53.28	MACS_peak_8852				MACS_peak_920	5_TSS	163	23540779	23527774	-	ACIN1_dup1
chr14	23789964	23790447	MACS_peak_921	207.83	1	chr14	23789172	23792272	657.6	MACS_peak_8860				MACS_peak_921	5_TSS	870	23789397	23795394	+	PABPN1
chr14	23790450	23790774	MACS_peak_922	212.68	1	chr14	23789172	23792272	657.6	MACS_peak_8860				MACS_peak_922	Intragenic	1266	23789397	23795394	+	PABPN1
chr14	23790844	23791240	MACS_peak_923	160.93	1	chr14	23789172	23792272	657.6	MACS_peak_8860				MACS_peak_923	Intragenic	1503	23789397	23795394	+	PABPN1
chr14	23795891	23796104	MACS_peak_924	59.46	0	0	0	0	0	0				MACS_peak_924	3_TTS	6581	23789397	23795394	+	PABPN1
chr14	23796158	23796306	MACS_peak_925	53.39	0	0	0	0	0	0				MACS_peak_925	3_TTS	6858	23789397	23795394	+	PABPN1
chr14	24570516	24570694	MACS_peak_926	57.06	0	0	0	0	0	0				MACS_peak_926	3_TTS	7239	24563340	24569962	+	PCK2_dup2
chr14	24609986	24610215	MACS_peak_927	66.91	1	chr14	24608945	24612203	269.85	MACS_peak_8874				MACS_peak_927	5_TSS	691	24610797	24608174	-	EMC9_dup1
chr14	24641061	24641469	MACS_peak_928	61.36	1	chr14	24639955	24642522	110.36	MACS_peak_8877				MACS_peak_928	5_TSS	-99	24641234	24649463	+	REC8_dup1
chr14	24651424	24651559	MACS_peak_929	56.27	0	0	0	0	0	0				MACS_peak_929	3_TTS	10272	24641234	24649463	+	REC8_dup1
chr14	24657687	24658146	MACS_peak_930	172.81	1	chr14	24656583	24659128	307.25	MACS_peak_8878				MACS_peak_930	5_TSS	121	24658124	24649425	-	IPO4_dup1
chr14	24664537	24664992	MACS_peak_931	113.35	1	chr14	24663260	24666539	220.55	MACS_peak_8879				MACS_peak_931	5_TSS	95	24664942	24658349	-	TM9SF1_dup1
chr14	24684946	24685453	MACS_peak_932	329.53	1	chr14	24683910	24686398	184.3	MACS_peak_8882				MACS_peak_932	5_TSS	115	24685276	24683143	-	MDP1_dup1
chr14	24685537	24685692	MACS_peak_933	52.28	1	chr14	24683910	24686398	184.3	MACS_peak_8882				MACS_peak_933	5_TSS	-338	24685276	24683143	-	MDP1_dup1
chr14	24781592	24781727	MACS_peak_934	50.83	0	0	0	0	0	0				MACS_peak_934	5_TSS	-632	24782313	24787242	+	LTB4R_dup1
chr14	31090755	31091024	MACS_peak_935	86.92	1	chr14	31090038	31092690	262.93	MACS_peak_8915				MACS_peak_935	5_TSS	-579	31091460	31205033	+	SCFD1_dup1
chr14	31091033	31092088	MACS_peak_936	664.53	1	chr14	31090038	31092690	262.93	MACS_peak_8915				MACS_peak_936	5_TSS	-28	31091460	31205033	+	SCFD1_dup1
chr14	35761393	35761976	MACS_peak_937	151.23	1	chr14	35760419	35762831	118.78	MACS_peak_8994				MACS_peak_937	5_TSS	57	35761523	35786685	+	PSMA6_dup1
chr14	36290528	36290637	MACS_peak_938	51.14	0	0	0	0	0	0				MACS_peak_938	5_Proximal	-5021	36295597	36341169	+	BRMS1L
chr14	39656216	39656402	MACS_peak_939	56.67	0	0	0	0	0	0				MACS_peak_939	3_TTS	11924	39644387	39652422	+	PNN
chr14	48000972	48001079	MACS_peak_940	51.53	0	0	0	0	0	0				MACS_peak_940	Intragenic	143125	48144157	47308828	-	MDGA2_dup1
chr14	50041419	50041583	MACS_peak_941	55.04	0	0	0	0	0	0				MACS_peak_941	3_TTS	11599	50053134	50043390	-	RPS29
chr14	50042929	50043043	MACS_peak_942	50.22	0	0	0	0	0	0				MACS_peak_942	3_TTS	10158	50053134	50043390	-	RPS29
chr14	50049057	50049270	MACS_peak_943	50.37	0	0	0	0	0	0				MACS_peak_943	3_TTS	3942	50053134	50050290	-	RPS29_dup1
chr14	50089350	50089514	MACS_peak_944	52.63	1	chr14	50085726	50089354	245.48	MACS_peak_9092				MACS_peak_944	3_TTS	1976	50087489	50090199	+	MGAT2
chr14	50583127	50583268	MACS_peak_945	50.43	1	chr14	50581664	50585013	332.72	MACS_peak_9108				MACS_peak_945	5_TSS	123	50583297	50575350	-	VCPKMT_dup1
chr14	50857938	50858073	MACS_peak_946	55.09	0	0	0	0	0	0				MACS_peak_946	3_Distal	141362	50999376	50885211	-	MAP4K5_dup1
chr14	51595465	51595591	MACS_peak_947	63.94	0	0	0	0	0	0				MACS_peak_947	5_Distal	-33128	51562422	51441981	-	TRIM9
chr14	51973071	51973286	MACS_peak_948	52.41	0	0	0	0	0	0				MACS_peak_948	3_Distal	93518	52066670	52013347	-	FRMD6-AS2_dup1
chr14	54889437	54889713	MACS_peak_949	51.46	0	0	0	0	0	0				MACS_peak_949	3_TTS	18485	54908148	54893647	-	CNIH1
chr14	55499273	55499449	MACS_peak_950	51.93	0	0	0	0	0	0				MACS_peak_950	Intragenic	5517	55493844	55516206	+	SOCS4_dup1
chr14	62162208	62162385	MACS_peak_951	59.41	1	chr14	62160601	62165331	273.51	MACS_peak_9317				MACS_peak_951	5_TSS	136	62162119	62214977	+	HIF1A_dup1
chr14	62355641	62355842	MACS_peak_952	59.96	0	0	0	0	0	0				MACS_peak_952	3_Distal	126673	62229075	62263146	+	SNAPC1
chr14	65220010	65220306	MACS_peak_953	94.03	0	0	0	0	0	0				MACS_peak_953	3_Distal	32297	65252404	65252344	-	MIR7855
chr14	65220677	65220944	MACS_peak_954	59.12	1	chr14	65221443	65223826	262.86	MACS_peak_9358				MACS_peak_954	3_Distal	31672	65252404	65252344	-	MIR7855
chr14	65221075	65221333	MACS_peak_955	70.36	1	chr14	65221443	65223826	262.86	MACS_peak_9358				MACS_peak_955	3_Distal	31257	65252404	65252344	-	MIR7855
chr14	66276111	66276237	MACS_peak_956	51.02	0	0	0	0	0	0				MACS_peak_956	3_Distal	398857	65877310	66210839	+	FUT8_dup1
chr14	67878933	67879014	MACS_peak_957	54.83	1	chr14	67877311	67880110	168.74	MACS_peak_9403				MACS_peak_957	5_TSS	-55	67878917	67853696	-	PLEK2
chr14	68141224	68141949	MACS_peak_958	290.85	1	chr14	68140089	68143129	355.66	MACS_peak_9413				MACS_peak_958	5_TSS	-227	68141602	68117867	-	VTI1B
chr14	68312387	68312503	MACS_peak_959	57.27	0	0	0	0	0	0				MACS_peak_959	5_Distal	-29146	68283306	68213237	-	ZFYVE26
chr14	69252235	69253626	MACS_peak_960	415.41	1	chr14	69250416	69264195	1154.79	MACS_peak_9458				MACS_peak_960	3_TTS	7354	69260631	69254372	-	ZFP36L1_dup1
chr14	69253665	69254013	MACS_peak_961	88.03	1	chr14	69250416	69264195	1154.79	MACS_peak_9458				MACS_peak_961	3_TTS	6715	69260631	69254372	-	ZFP36L1_dup1
chr14	69260421	69260841	MACS_peak_962	133.83	1	chr14	69250416	69264195	1154.79	MACS_peak_9458				MACS_peak_962	5_TSS	38	69260631	69254372	-	ZFP36L1_dup1
chr14	69260883	69261361	MACS_peak_963	143.26	1	chr14	69250416	69264195	1154.79	MACS_peak_9458				MACS_peak_963	5_TSS	-435	69260631	69254372	-	ZFP36L1_dup1
chr14	69378769	69378898	MACS_peak_964	50.07	0	0	0	0	0	0				MACS_peak_964	Intragenic	67229	69446083	69340840	-	ACTN1_dup1
chr14	71235110	71235211	MACS_peak_965	51.42	0	0	0	0	0	0				MACS_peak_965	Intragenic	15002	71250169	71189243	-	MAP3K9_dup1
chr14	72932501	72932655	MACS_peak_966	55.48	0	0	0	0	0	0				MACS_peak_966	5_Distal	-50915	72983528	72983606	+	MIR7843
chr14	73118240	73118338	MACS_peak_967	52.53	0	0	0	0	0	0				MACS_peak_967	3_Proximal	241069	73359357	73127751	-	DPF3_dup1
chr14	73603078	73603341	MACS_peak_968	64.29	1	chr14	73601944	73604742	230.96	MACS_peak_9536				MACS_peak_968	5_TSS	86	73603143	73690399	+	PSEN1_dup1
chr14	73619961	73620044	MACS_peak_969	57.87	0	0	0	0	0	0				MACS_peak_969	3_Distal	94780	73525221	73588076	+	RBM25
chr14	73732523	73732691	MACS_peak_970	58.13	0	0	0	0	0	0				MACS_peak_970	5_Distal	-19875	73712709	73710726	-	LOC101928123
chr14	73735907	73736120	MACS_peak_971	87.74	0	0	0	0	0	0				MACS_peak_971	5_Distal	-23317	73712709	73710726	-	LOC101928123
chr14	74180699	74181230	MACS_peak_972	174.48	1	chr14	74179195	74182370	288.71	MACS_peak_9545				MACS_peak_972	5_TSS	61	74181128	74178486	-	PNMA1
chr14	76066058	76066200	MACS_peak_973	55.32	0	0	0	0	0	0				MACS_peak_973	5_Distal	-20222	76045931	76041247	-	LOC102724153
chr14	78172000	78172145	MACS_peak_974	50.75	0	0	0	0	0	0				MACS_peak_974	5_TSS	-2314	78174414	78183941	+	SLIRP_dup1
chr14	78173136	78173341	MACS_peak_975	58.3	1	chr14	78172679	78176187	221.86	MACS_peak_9636				MACS_peak_975	5_TSS	-1173	78174414	78183941	+	SLIRP_dup1
chr14	84446037	84446219	MACS_peak_976	53.81	0	0	0	0	0	0				MACS_peak_976	Intergenic	-1292105	85738276	85738405	+	SNORD3P3
chr14	88952566	88952679	MACS_peak_977	59.42	0	0	0	0	0	0				MACS_peak_977	Intragenic	68490	89021123	88932122	-	PTPN21
chr14	89314492	89314571	MACS_peak_978	59.61	0	0	0	0	0	0				MACS_peak_978	Intragenic	24033	89290497	89344340	+	TTC8_dup1
chr14	89790202	89790358	MACS_peak_979	56.48	0	0	0	0	0	0				MACS_peak_979	5_Distal	-93407	89883698	89886137	+	FOXN3-AS1
chr14	90741639	90741831	MACS_peak_980	59.56	0	0	0	0	0	0				MACS_peak_980	3_TTS	17434	90724283	90738969	+	PSMC1_dup1
chr14	90875244	90875409	MACS_peak_981	50.89	0	0	0	0	0	0				MACS_peak_981	3_TTS	11959	90863327	90874619	+	CALM1
chr14	91920361	91920541	MACS_peak_982	54.35	0	0	0	0	0	0				MACS_peak_982	5_Distal	-36266	91884188	91737667	-	CCDC88C
chr14	92230892	92231032	MACS_peak_983	53.26	0	0	0	0	0	0				MACS_peak_983	5_Distal	-32502	92198430	92047118	-	CATSPERB
chr14	92579877	92580003	MACS_peak_984	51.79	0	0	0	0	0	0				MACS_peak_984	5_Proximal	-6993	92572965	92524896	-	ATXN3_dup10
chr14	92580631	92580810	MACS_peak_985	55.94	0	0	0	0	0	0				MACS_peak_985	3_TTS	7442	92588153	92582468	-	NDUFB1
chr14	93302758	93302872	MACS_peak_986	55.44	0	0	0	0	0	0				MACS_peak_986	Intragenic	42229	93260576	93306306	+	GOLGA5
chr14	94509862	94510067	MACS_peak_987	84.69	0	0	0	0	0	0				MACS_peak_987	Intragenic	17253	94492724	94515276	+	OTUB2
chr14	97045075	97045431	MACS_peak_988	100.53	0	0	0	0	0	0				MACS_peak_988	3_Distal	75939	96969202	97033453	+	PAPOLA_dup5
chr14	97045725	97045886	MACS_peak_989	54.57	0	0	0	0	0	0				MACS_peak_989	3_Distal	76640	96969202	97033453	+	PAPOLA_dup5
chr14	97416134	97416292	MACS_peak_990	50.07	0	0	0	0	0	0				MACS_peak_990	3_TTS	6311	97409916	97411731	+	LINC00618
chr14	100195448	100195560	MACS_peak_991	55.48	0	0	0	0	0	0				MACS_peak_991	3_TTS	44741	100150755	100193638	+	CYP46A1
chr14	100680541	100680817	MACS_peak_992	66.95	1	chr14	100679301	100682129	164.24	MACS_peak_9857				MACS_peak_992	5_Distal	-63018	100743694	100743754	+	MIR6764
chr14	100751502	100752068	MACS_peak_993	267.32	1	chr14	100750678	100753239	304.52	MACS_peak_9859				MACS_peak_993	3_Proximal	8183	100743694	100743754	+	MIR6764
chr14	101265397	101265518	MACS_peak_994	50.8	0	0	0	0	0	0				MACS_peak_994	5_Distal	-15359	101280828	101280911	+	MIR2392
chr14	102385803	102385958	MACS_peak_995	55.26	0	0	0	0	0	0				MACS_peak_995	5_Distal	-45016	102430865	102517135	+	DYNC1H1
chr14	102523255	102523390	MACS_peak_996	59.21	0	0	0	0	0	0				MACS_peak_996	3_Proximal	92476	102430865	102517135	+	DYNC1H1
chr14	102523449	102523590	MACS_peak_997	51.29	0	0	0	0	0	0				MACS_peak_997	3_Proximal	92653	102430865	102517135	+	DYNC1H1
chr14	102524247	102524396	MACS_peak_998	55.75	0	0	0	0	0	0				MACS_peak_998	3_Proximal	93483	102430865	102517135	+	DYNC1H1
chr14	103091054	103091205	MACS_peak_999	53.58	0	0	0	0	0	0				MACS_peak_999	3_Distal	85159	103005981	103006063	+	MIR4309
chr14	103110963	103111073	MACS_peak_1000	51.66	0	0	0	0	0	0				MACS_peak_1000	Intragenic	52015	103058996	103196913	+	RCOR1
chr14	103381415	103381574	MACS_peak_1001	55.97	0	0	0	0	0	0				MACS_peak_1001	5_Proximal	-7515	103388993	103397179	+	AMN
chr14	103670237	103670368	MACS_peak_1002	50.31	1	chr14	103669203	103676629	581.74	MACS_peak_9919				MACS_peak_1002	5_Distal	-14956	103655365	103653558	-	LINC00605
chr14	103682863	103683090	MACS_peak_1003	101.91	0	0	0	0	0	0				MACS_peak_1003	5_Distal	-27611	103655365	103653558	-	LINC00605
chr14	103685236	103685368	MACS_peak_1004	53.35	0	0	0	0	0	0				MACS_peak_1004	5_Distal	-29912	103655365	103653558	-	LINC00605
chr14	103695767	103695975	MACS_peak_1005	53.58	0	0	0	0	0	0				MACS_peak_1005	5_Distal	-40505	103655365	103653558	-	LINC00605
chr14	103810561	103810825	MACS_peak_1006	72.63	0	0	0	0	0	0				MACS_peak_1006	3_TTS	10348	103800339	103811361	+	EIF5
chr14	103811378	103811704	MACS_peak_1007	139.23	0	0	0	0	0	0				MACS_peak_1007	3_TTS	11291	103800339	103811361	+	EIF5
chr14	103811927	103812264	MACS_peak_1008	173.1	0	0	0	0	0	0				MACS_peak_1008	3_TTS	11658	103800339	103811361	+	EIF5
chr14	103984907	103985154	MACS_peak_1009	57.26	0	0	0	0	0	0				MACS_peak_1009	3_TTS	4152	103989196	103985995	-	CKB
chr14	103986656	103986793	MACS_peak_1010	56.3	1	chr14	103986222	103989271	171.78	MACS_peak_9925				MACS_peak_1010	3_TTS	2462	103989196	103985995	-	CKB
chr14	103986982	103987230	MACS_peak_1011	128	1	chr14	103986222	103989271	171.78	MACS_peak_9925				MACS_peak_1011	Intragenic	2016	103989196	103985995	-	CKB
chr14	103987254	103987546	MACS_peak_1012	76.02	1	chr14	103986222	103989271	171.78	MACS_peak_9925				MACS_peak_1012	Intragenic	1868	103989196	103985995	-	CKB
chr14	103987991	103988141	MACS_peak_1013	53.69	1	chr14	103986222	103989271	171.78	MACS_peak_9925				MACS_peak_1013	Intragenic	1159	103989196	103985995	-	CKB
chr14	104003854	104004044	MACS_peak_1014	80.93	0	0	0	0	0	0				MACS_peak_1014	3_TTS	8470	103995509	104003410	+	TRMT61A
chr14	104004946	104005159	MACS_peak_1015	50.99	0	0	0	0	0	0				MACS_peak_1015	3_TTS	9570	103995509	104003410	+	TRMT61A
chr14	104178962	104179127	MACS_peak_1016	57.72	0	0	0	0	0	0				MACS_peak_1016	3_Distal	83496	104095525	104167888	+	KLC1_dup1
chr14	104201054	104201217	MACS_peak_1017	52.22	0	0	0	0	0	0				MACS_peak_1017	3_TTS	19037	104182081	104200005	+	ZFYVE21_dup1
chr14	104383176	104383324	MACS_peak_1018	52.11	0	0	0	0	0	0				MACS_peak_1018	Intragenic	4680	104387903	104378625	-	C14orf2_dup1
chr14	104577559	104577734	MACS_peak_1019	57.03	0	0	0	0	0	0				MACS_peak_1019	5_Proximal	-6113	104583742	104583851	+	MIR203A
chr14	104578198	104578417	MACS_peak_1020	98.21	0	0	0	0	0	0				MACS_peak_1020	5_Proximal	-5428	104583742	104583851	+	MIR203A
chr14	104578554	104578757	MACS_peak_1021	51.02	0	0	0	0	0	0				MACS_peak_1021	5_Proximal	-5092	104583742	104583851	+	MIR203A
chr14	104586264	104586384	MACS_peak_1022	59.66	0	0	0	0	0	0				MACS_peak_1022	5_TSS	-2469	104583840	104583755	-	MIR203B
chr14	104586406	104586557	MACS_peak_1023	61.21	0	0	0	0	0	0				MACS_peak_1023	5_TSS	-2666	104583840	104583755	-	MIR203B
chr14	105189826	105191076	MACS_peak_1024	572.53	1	chr14	105188823	105192070	370.6	MACS_peak_9944				MACS_peak_1024	5_TSS	-433	105190534	105213662	+	ADSSL1
chr14	105234791	105235151	MACS_peak_1025	108.88	0	0	0	0	0	0				MACS_peak_1025	3_TTS	27170	105262080	105235687	-	AKT1_dup1
chr14	105322550	105322839	MACS_peak_1026	67.18	0	0	0	0	0	0				MACS_peak_1026	5_Proximal	-8927	105331650	105363107	+	CEP170B_dup1
chr14	105469663	105469788	MACS_peak_1027	52.04	0	0	0	0	0	0				MACS_peak_1027	3_Proximal	17090	105452616	105461855	+	C14orf79
chr14	105472189	105472362	MACS_peak_1028	53.92	0	0	0	0	0	0				MACS_peak_1028	3_TTS	15167	105487425	105475910	-	CDCA4_dup1
chr14	105472538	105472727	MACS_peak_1029	59.86	0	0	0	0	0	0				MACS_peak_1029	3_TTS	14806	105487425	105475910	-	CDCA4_dup1
chr14	105472999	105473196	MACS_peak_1030	105.83	0	0	0	0	0	0				MACS_peak_1030	3_TTS	14277	105487425	105475910	-	CDCA4_dup1
chr14	105475642	105475841	MACS_peak_1031	55.19	0	0	0	0	0	0				MACS_peak_1031	3_TTS	11686	105487425	105475910	-	CDCA4_dup1
chr14	105552146	105552323	MACS_peak_1032	59.4	1	chr14	105552401	105556238	450.88	MACS_peak_9955				MACS_peak_1032	5_Distal	-20364	105531887	105515726	-	GPR132_dup1
chr14	105553076	105553588	MACS_peak_1033	148.22	1	chr14	105552401	105556238	450.88	MACS_peak_9955				MACS_peak_1033	5_Distal	-21314	105531887	105515726	-	GPR132_dup1
chr14	105553596	105553754	MACS_peak_1034	60.53	1	chr14	105552401	105556238	450.88	MACS_peak_9955				MACS_peak_1034	5_Distal	-21757	105531887	105515726	-	GPR132_dup1
chr14	105553759	105554217	MACS_peak_1035	153.39	1	chr14	105552401	105556238	450.88	MACS_peak_9955				MACS_peak_1035	5_Distal	-22211	105531887	105515726	-	GPR132_dup1
chr14	105842565	105842682	MACS_peak_1036	52.04	0	0	0	0	0	0				MACS_peak_1036	5_Distal	-22293	105864920	105880196	+	TEX22
chr14	105864479	105864930	MACS_peak_1037	136.51	1	chr14	105863208	105866162	278.44	MACS_peak_9963				MACS_peak_1037	5_TSS	-306	105864920	105880196	+	TEX22
chr14	105870097	105870262	MACS_peak_1038	55.71	0	0	0	0	0	0				MACS_peak_1038	3_Proximal	103049	105767148	105864484	+	PACS2
chr14	105886610	105886727	MACS_peak_1039	60.64	1	chr14	105884999	105887491	112.91	MACS_peak_9964				MACS_peak_1039	5_TSS	-601	105886076	105883918	-	LOC100507437_dup1
chr14	105899906	105900084	MACS_peak_1040	54.44	0	0	0	0	0	0				MACS_peak_1040	5_Distal	-13963	105886076	105883918	-	LOC100507437_dup1
chr14	105956268	105956790	MACS_peak_1041	124.61	1	chr14	105955009	105959003	551.74	MACS_peak_9967				MACS_peak_1041	5_TSS	-135	105956520	105965585	+	C14orf80_dup1
chr14	105967251	105967423	MACS_peak_1042	56.48	0	0	0	0	0	0				MACS_peak_1042	3_TTS	9711	105957586	105965585	+	C14orf80_dup2
chr14	105967886	105968042	MACS_peak_1043	77.52	0	0	0	0	0	0				MACS_peak_1043	3_TTS	10348	105957586	105965585	+	C14orf80_dup2
chr14	105968155	105968342	MACS_peak_1044	89.64	0	0	0	0	0	0				MACS_peak_1044	3_TTS	10707	105957586	105965585	+	C14orf80_dup2
chr14	107119795	107119924	MACS_peak_1045	51.06	0	0	0	0	0	0				MACS_peak_1045	Intergenic	139338	107259214	107259100	-	MIR5195
chr15	23002718	23002853	MACS_peak_1046	62.62	0	0	0	0	0	0				MACS_peak_1046	3_TTS	31660	23034427	23004684	-	NIPA2_dup1
chr15	26070256	26070442	MACS_peak_1047	51.43	0	0	0	0	0	0				MACS_peak_1047	3_Distal	23626	26093972	26093894	-	MIR4715
chr15	27653682	27653804	MACS_peak_1048	52.79	0	0	0	0	0	0				MACS_peak_1048	Intragenic	437294	27216429	27726479	+	GABRG3
chr15	34630255	34630482	MACS_peak_1049	76.54	1	chr15	34629105	34631224	172.63	MACS_peak_10039				MACS_peak_1049	5_TSS	-99	34630265	34522197	-	SLC12A6_dup4
chr15	35280420	35280577	MACS_peak_1050	61.18	1	chr15	35279521	35282026	320.65	MACS_peak_10047				MACS_peak_1050	5_TSS	33	35280497	35270542	-	ZNF770
chr15	38625896	38626045	MACS_peak_1051	52.66	0	0	0	0	0	0				MACS_peak_1051	Intragenic	80946	38545052	38649450	+	SPRED1
chr15	40123730	40123870	MACS_peak_1052	51.51	0	0	0	0	0	0				MACS_peak_1052	5_TSS	-2288	40121477	40091223	-	GPR176_dup2
chr15	40712309	40712443	MACS_peak_1053	52.87	0	0	0	0	0	0				MACS_peak_1053	Intragenic	14708	40697686	40713512	+	IVD_dup1
chr15	40713844	40714341	MACS_peak_1054	250.4	1	chr15	40713218	40715111	111.54	MACS_peak_10144				MACS_peak_1054	3_TTS	16212	40697686	40713512	+	IVD_dup1
chr15	41234137	41234273	MACS_peak_1055	52.41	1	chr15	41232579	41235314	250.36	MACS_peak_10165				MACS_peak_1055	5_Distal	-11119	41245347	41248717	+	CHAC1_dup1
chr15	41249797	41250170	MACS_peak_1056	95.65	0	0	0	0	0	0				MACS_peak_1056	3_TTS	4549	41245347	41248717	+	CHAC1_dup1
chr15	41250586	41250728	MACS_peak_1057	62.63	0	0	0	0	0	0				MACS_peak_1057	3_TTS	5340	41245347	41248717	+	CHAC1_dup1
chr15	42119975	42120096	MACS_peak_1058	56.48	1	chr15	42119001	42121509	115.61	MACS_peak_10183				MACS_peak_1058	5_TSS	-267	42120283	42129785	+	JMJD7
chr15	42120135	42120505	MACS_peak_1059	172.41	1	chr15	42119001	42121509	115.61	MACS_peak_10183				MACS_peak_1059	5_TSS	-100	42120283	42129785	+	JMJD7
chr15	42449796	42449915	MACS_peak_1060	56.61	0	0	0	0	0	0				MACS_peak_1060	5_TSS	-1027	42448839	42433332	-	PLA2G4F_dup1
chr15	42500461	42500574	MACS_peak_1061	53.07	1	chr15	42499588	42501557	105.56	MACS_peak_10193				MACS_peak_1061	5_TSS	-1	42500524	42450899	-	VPS39_dup1
chr15	43477404	43477876	MACS_peak_1062	203.55	1	chr15	43476696	43478661	82.18	MACS_peak_10209				MACS_peak_1062	5_TSS	188	43477466	43489375	+	CCNDBP1_dup1
chr15	43477882	43478051	MACS_peak_1063	65.48	1	chr15	43476696	43478661	82.18	MACS_peak_10209				MACS_peak_1063	5_TSS	472	43477466	43489375	+	CCNDBP1_dup1
chr15	44068106	44068329	MACS_peak_1064	71.65	1	chr15	44067081	44069215	53.09	MACS_peak_10214				MACS_peak_1064	5_TSS	-1015	44069294	44088287	+	SERF2
chr15	44068358	44068549	MACS_peak_1065	80.93	1	chr15	44067081	44069215	53.09	MACS_peak_10214				MACS_peak_1065	5_TSS	-819	44069294	44088287	+	SERF2
chr15	44092758	44092924	MACS_peak_1066	59.2	1	chr15	44091772	44094039	62.67	MACS_peak_10217				MACS_peak_1066	5_TSS	258	44092619	44094769	+	HYPK_dup1
chr15	44092944	44093271	MACS_peak_1067	124.93	1	chr15	44091772	44094039	62.67	MACS_peak_10217				MACS_peak_1067	5_TSS	421	44092619	44094769	+	HYPK_dup1
chr15	46716486	46716627	MACS_peak_1068	61.07	0	0	0	0	0	0				MACS_peak_1068	Intergenic	719140	45997393	46223267	+	LOC105370802
chr15	50637458	50637607	MACS_peak_1069	56.64	0	0	0	0	0	0				MACS_peak_1069	5_Proximal	-8835	50646371	50650503	+	GABPB1-AS1
chr15	50843456	50843625	MACS_peak_1070	56.48	0	0	0	0	0	0				MACS_peak_1070	5_TSS	-4627	50838902	50792759	-	USP50
chr15	50843903	50844107	MACS_peak_1071	63.13	0	0	0	0	0	0				MACS_peak_1071	5_Proximal	-5083	50838902	50792759	-	USP50
chr15	52838580	52838744	MACS_peak_1072	53.12	0	0	0	0	0	0				MACS_peak_1072	5_Distal	-17429	52821247	52599480	-	MYO5A_dup1
chr15	56096571	56096793	MACS_peak_1073	62.44	0	0	0	0	0	0				MACS_peak_1073	5_Distal	-61366	56035317	55903739	-	PRTG
chr15	58708817	58708970	MACS_peak_1074	50.97	0	0	0	0	0	0				MACS_peak_1074	5_Distal	-15313	58724175	58861073	+	LIPC
chr15	59397297	59397499	MACS_peak_1075	57.47	1	chr15	59396231	59398435	141.86	MACS_peak_10406				MACS_peak_1075	5_TSS	108	59397284	59417244	+	CCNB2
chr15	59949362	59949851	MACS_peak_1076	140.88	1	chr15	59948698	59950686	61.61	MACS_peak_10420				MACS_peak_1076	5_TSS	-9	59949453	59930261	-	GTF2A2_dup1
chr15	60636160	60636335	MACS_peak_1077	57.03	1	chr15	60634811	60636783	64.68	MACS_peak_10422				MACS_peak_1077	3_TTS	53979	60690185	60639350	-	ANXA2_dup1
chr15	63365567	63365791	MACS_peak_1078	78.85	0	0	0	0	0	0				MACS_peak_1078	3_TTS	25028	63340636	63364113	+	TPM1_dup10
chr15	63365913	63366065	MACS_peak_1079	56.17	0	0	0	0	0	0				MACS_peak_1079	3_TTS	25324	63340636	63364113	+	TPM1_dup10
chr15	63780482	63780659	MACS_peak_1080	62.39	0	0	0	0	0	0				MACS_peak_1080	5_Distal	-16112	63796710	63886839	+	USP3_dup1
chr15	65419841	65419982	MACS_peak_1081	51.29	0	0	0	0	0	0				MACS_peak_1081	Intragenic	6288	65426174	65409717	-	PDCD7
chr15	66789766	66790618	MACS_peak_1082	741.63	1	chr15	66788991	66791162	230.52	MACS_peak_10516				MACS_peak_1082	5_TSS	-737	66789372	66789296	-	MIR4512
chr15	67003646	67003770	MACS_peak_1083	62.43	0	0	0	0	0	0				MACS_peak_1083	3_Distal	129196	66874528	66978136	+	LINC01169
chr15	68493134	68493265	MACS_peak_1084	53.58	0	0	0	0	0	0				MACS_peak_1084	3_Proximal	28884	68522080	68499330	-	CLN6
chr15	69068039	69068199	MACS_peak_1085	56.63	0	0	0	0	0	0				MACS_peak_1085	3_TTS	45149	69113261	69070875	-	ANP32A
chr15	69068675	69068798	MACS_peak_1086	55.57	0	0	0	0	0	0				MACS_peak_1086	3_TTS	44512	69113261	69070875	-	ANP32A
chr15	69068818	69068973	MACS_peak_1087	67.57	0	0	0	0	0	0				MACS_peak_1087	3_TTS	44395	69113261	69070875	-	ANP32A
chr15	69264186	69264316	MACS_peak_1088	53.82	0	0	0	0	0	0				MACS_peak_1088	3_Distal	41433	69222839	69239150	+	SPESP1
chr15	69749772	69749946	MACS_peak_1089	54.85	0	0	0	0	0	0				MACS_peak_1089	3_TTS	4736	69745159	69747884	+	RPLP1_dup1
chr15	72489294	72489512	MACS_peak_1090	72.34	0	0	0	0	0	0				MACS_peak_1090	5_TSS	728	72490136	72452147	-	GRAMD2
chr15	72668190	72668360	MACS_peak_1091	68.02	1	chr15	72667152	72669763	178.5	MACS_peak_10623				MACS_peak_1091	5_TSS	-151	72668454	72671129	+	HEXA-AS1
chr15	75135346	75135693	MACS_peak_1092	87.64	1	chr15	75134408	75136807	154.43	MACS_peak_10644				MACS_peak_1092	5_TSS	98	75135552	75128457	-	ULK3_dup1
chr15	75191668	75191794	MACS_peak_1093	52.58	0	0	0	0	0	0				MACS_peak_1093	3_TTS	7522	75199235	75192328	-	FAM219B_dup10
chr15	75506345	75506591	MACS_peak_1094	86.59	1	chr15	75506877	75508756	78.64	MACS_peak_10663				MACS_peak_1094	3_TTS	12319	75494221	75504510	+	C15orf39
chr15	75507014	75508051	MACS_peak_1095	447.98	1	chr15	75506877	75508756	78.64	MACS_peak_10663				MACS_peak_1095	3_TTS	13623	75494221	75504510	+	C15orf39
chr15	75660670	75660964	MACS_peak_1096	77.91	1	chr15	75659444	75661960	169.1	MACS_peak_10665				MACS_peak_1096	5_TSS	76	75660968	75648133	-	MAN2C1_dup1
chr15	75748060	75748193	MACS_peak_1097	73.73	1	chr15	75741998	75749377	860.64	MACS_peak_10666				MACS_peak_1097	5_TSS	16	75748124	75661720	-	SIN3A_dup2
chr15	76196097	76196320	MACS_peak_1098	50.02	1	chr15	76194523	76197630	244.19	MACS_peak_10673				MACS_peak_1098	5_TSS	23	76196200	76227608	+	FBXO22_dup1
chr15	76236294	76236470	MACS_peak_1099	58.89	0	0	0	0	0	0				MACS_peak_1099	5_Distal	-10920	76225471	76225024	-	FBXO22-AS1
chr15	77327992	77328200	MACS_peak_1100	76.29	0	0	0	0	0	0				MACS_peak_1100	3_Proximal	35420	77363570	77336360	-	TSPAN3_dup1
chr15	78664369	78664494	MACS_peak_1101	52.04	0	0	0	0	0	0				MACS_peak_1101	3_Distal	31741	78632666	78640572	+	CRABP1
chr15	80263648	80263787	MACS_peak_1102	51.73	0	0	0	0	0	0				MACS_peak_1102	5_TSS	-41	80263643	80253232	-	BCL2A1_dup1
chr15	85524615	85524903	MACS_peak_1103	79.35	1	chr15	85522767	85526713	257.98	MACS_peak_10757				MACS_peak_1103	5_TSS	-348	85525205	85682372	+	PDE8A_dup1
chr15	85524939	85525711	MACS_peak_1104	229	1	chr15	85522767	85526713	257.98	MACS_peak_10757				MACS_peak_1104	5_TSS	-184	85525205	85682372	+	PDE8A_dup1
chr15	89170712	89170858	MACS_peak_1105	54.36	0	0	0	0	0	0				MACS_peak_1105	Intragenic	6222	89164527	89175512	+	AEN
chr15	89179276	89179784	MACS_peak_1106	108.75	0	0	0	0	0	0				MACS_peak_1106	5_TSS	700	89178868	89199575	+	ISG20_dup1
chr15	89179995	89180121	MACS_peak_1107	52.38	0	0	0	0	0	0				MACS_peak_1107	3_TTS	15548	89164527	89175512	+	AEN
chr15	89438982	89439147	MACS_peak_1108	56.48	0	0	0	0	0	0				MACS_peak_1108	5_TSS	-218	89438857	89420516	-	HAPLN3_dup1
chr15	89721533	89721661	MACS_peak_1109	51.49	0	0	0	0	0	0				MACS_peak_1109	3_Distal	43354	89764922	89753098	-	RLBP1
chr15	89858954	89859111	MACS_peak_1110	67.07	0	0	0	0	0	0				MACS_peak_1110	3_TTS	19000	89878026	89859536	-	POLG_dup1
chr15	89860847	89860968	MACS_peak_1111	56.08	0	0	0	0	0	0				MACS_peak_1111	3_TTS	73700	89787194	89860362	+	FANCI_dup1
chr15	90175476	90175821	MACS_peak_1112	119.69	0	0	0	0	0	0				MACS_peak_1112	3_TTS	56775	90118818	90171253	+	TICRR_dup1
chr15	90176103	90176256	MACS_peak_1113	58.2	0	0	0	0	0	0				MACS_peak_1113	3_TTS	57333	90118818	90171253	+	TICRR_dup1
chr15	90744595	90744819	MACS_peak_1114	93.68	0	0	0	0	0	0				MACS_peak_1114	5_TSS	145	90744562	90772892	+	SEMA4B_dup4
chr15	91498198	91498354	MACS_peak_1115	52.07	1	chr15	91497136	91499573	266.19	MACS_peak_10822				MACS_peak_1115	5_TSS	137	91498106	91506355	+	RCCD1_dup1
chr15	91785501	91785666	MACS_peak_1116	53.32	0	0	0	0	0	0				MACS_peak_1116	Intragenic	140686	91644886	91845795	+	SV2B_dup10
chr15	93447601	93447793	MACS_peak_1117	67.32	1	chr15	93446191	93448888	384.39	MACS_peak_10841				MACS_peak_1117	5_TSS	20	93447629	93447705	+	MIR3175
chr15	93572143	93572618	MACS_peak_1118	205.2	0	0	0	0	0	0				MACS_peak_1118	3_TTS	128972	93443551	93571237	+	CHD2
chr15	93572671	93572812	MACS_peak_1119	51.29	0	0	0	0	0	0				MACS_peak_1119	3_TTS	129161	93443551	93571237	+	CHD2
chr15	93572863	93573032	MACS_peak_1120	74.05	0	0	0	0	0	0				MACS_peak_1120	3_TTS	129407	93443551	93571237	+	CHD2
chr15	93573062	93573199	MACS_peak_1121	51.19	0	0	0	0	0	0				MACS_peak_1121	3_TTS	129599	93443551	93571237	+	CHD2
chr15	96638985	96639143	MACS_peak_1122	51.44	0	0	0	0	0	0				MACS_peak_1122	3_Distal	231246	96870347	96670589	-	NR2F2-AS1
chr15	97717900	97718090	MACS_peak_1123	55.66	0	0	0	0	0	0				MACS_peak_1123	Intergenic	347036	98065041	97913601	-	LINC02254
chr15	102089743	102089901	MACS_peak_1124	57.07	1	chr15	102089617	102091370	90.36	MACS_peak_10946				MACS_peak_1124	5_Distal	-59604	102030187	101844133	-	PCSK6_dup1
chr16	133053	133193	MACS_peak_1125	51.51	0	0	0	0	0	0				MACS_peak_1125	3_TTS	55592	188697	135804	-	NPRL3_dup1
chr16	231326	231841	MACS_peak_1126	282.04	0	0	0	0	0	0				MACS_peak_1126	3_TTS	1218	230333	231178	+	HBQ1
chr16	316781	316890	MACS_peak_1127	52.04	0	0	0	0	0	0				MACS_peak_1127	3_TTS	9116	325943	318300	-	RGS11_dup1
chr16	420355	420751	MACS_peak_1128	306.34	1	chr16	419609	421692	102.49	MACS_peak_10959				MACS_peak_1128	5_TSS	80	420569	417384	-	MRPL28
chr16	451416	451993	MACS_peak_1129	343.2	1	chr16	450897	453080	151.57	MACS_peak_10961				MACS_peak_1129	5_TSS	-338	451858	462487	+	DECR2
chr16	534914	535106	MACS_peak_1130	50.34	0	0	0	0	0	0				MACS_peak_1130	Intragenic	10159	524850	572481	+	RAB11FIP3_dup1
chr16	571663	571791	MACS_peak_1131	54.31	1	chr16	570877	572734	94.13	MACS_peak_10964				MACS_peak_1131	3_TTS	96077	475668	572481	+	RAB11FIP3
chr16	572586	572721	MACS_peak_1132	52.64	1	chr16	570877	572734	94.13	MACS_peak_10964				MACS_peak_1132	3_TTS	4752	577407	576847	-	LINC00235
chr16	574414	574560	MACS_peak_1133	50.21	0	0	0	0	0	0				MACS_peak_1133	3_TTS	2884	577407	576847	-	LINC00235
chr16	636585	636691	MACS_peak_1134	60.29	1	chr16	636130	637835	51.38	MACS_peak_10968				MACS_peak_1134	5_TSS	-2734	639357	679273	+	RAB40C
chr16	637470	637677	MACS_peak_1135	51.93	1	chr16	636130	637835	51.38	MACS_peak_10968				MACS_peak_1135	5_TSS	-1751	639357	679273	+	RAB40C
chr16	698757	698970	MACS_peak_1136	72.28	1	chr16	698035	700595	145.64	MACS_peak_10974				MACS_peak_1136	5_TSS	445	699313	698458	-	LOC105371038
chr16	699174	699381	MACS_peak_1137	63.9	1	chr16	698035	700595	145.64	MACS_peak_10974				MACS_peak_1137	5_TSS	36	699313	698458	-	LOC105371038
chr16	717932	718140	MACS_peak_1138	95.23	1	chr16	717053	719097	83.57	MACS_peak_10975				MACS_peak_1138	5_TSS	-10	718083	724174	+	RHOT2
chr16	730439	730624	MACS_peak_1139	79.3	1	chr16	729116	731308	128.91	MACS_peak_10976				MACS_peak_1139	5_TSS	372	730111	732768	+	STUB1_dup1
chr16	730683	730798	MACS_peak_1140	62.73	1	chr16	729116	731308	128.91	MACS_peak_10976				MACS_peak_1140	5_TSS	640	730111	732768	+	STUB1_dup1
chr16	731159	731327	MACS_peak_1141	54.3	1	chr16	729116	731308	128.91	MACS_peak_10976				MACS_peak_1141	3_TTS	3248	734446	731666	-	JMJD8_dup1
chr16	733657	734490	MACS_peak_1142	581.71	1	chr16	732708	735352	209.88	MACS_peak_10977				MACS_peak_1142	5_TSS	197	734439	731667	-	JMJD8_dup7
chr16	739713	740005	MACS_peak_1143	80.84	1	chr16	739509	741365	179.41	MACS_peak_10978				MACS_peak_1143	5_TSS	613	740424	734622	-	WDR24
chr16	740050	740543	MACS_peak_1144	308.55	1	chr16	739509	741365	179.41	MACS_peak_10978				MACS_peak_1144	5_TSS	55	740424	734622	-	WDR24
chr16	765403	765608	MACS_peak_1145	65.79	1	chr16	764671	766352	57.33	MACS_peak_10980				MACS_peak_1145	5_TSS	325	765173	769655	+	METRN
chr16	770073	770298	MACS_peak_1146	75.42	1	chr16	769234	772256	239.06	MACS_peak_10981				MACS_peak_1146	5_TSS	-974	771142	772590	+	FAM173A_dup1
chr16	770645	770844	MACS_peak_1147	76.66	1	chr16	769234	772256	239.06	MACS_peak_10981				MACS_peak_1147	5_TSS	-362	771142	772590	+	FAM173A_dup1
chr16	770909	771197	MACS_peak_1148	102.62	1	chr16	769234	772256	239.06	MACS_peak_10981				MACS_peak_1148	5_TSS	-55	771142	772590	+	FAM173A_dup1
chr16	777016	777450	MACS_peak_1149	104	1	chr16	775959	779433	252.27	MACS_peak_10982				MACS_peak_1149	5_TSS	91	777246	779715	+	HAGHL_dup4
chr16	778234	778637	MACS_peak_1150	135.8	1	chr16	775959	779433	252.27	MACS_peak_10982				MACS_peak_1150	Intragenic	1132	777246	779715	+	HAGHL_dup4
chr16	779209	779352	MACS_peak_1151	60.58	1	chr16	775959	779433	252.27	MACS_peak_10982				MACS_peak_1151	3_TTS	2031	777246	779715	+	HAGHL_dup4
chr16	834572	834705	MACS_peak_1152	53.11	0	0	0	0	0	0				MACS_peak_1152	3_TTS	3769	838383	834974	-	RPUSD1_dup1
chr16	851417	851538	MACS_peak_1153	56.08	0	0	0	0	0	0				MACS_peak_1153	5_TSS	-727	850733	848041	-	GNG13
chr16	1755275	1755410	MACS_peak_1154	90.42	1	chr16	1755031	1757366	313.68	MACS_peak_11000				MACS_peak_1154	5_TSS	-824	1756184	1820318	+	MAPK8IP3_dup1
chr16	1755625	1756125	MACS_peak_1155	235.48	1	chr16	1755031	1757366	313.68	MACS_peak_11000				MACS_peak_1155	5_TSS	-177	1756184	1820318	+	MAPK8IP3_dup1
chr16	1818300	1818439	MACS_peak_1156	51.73	0	0	0	0	0	0				MACS_peak_1156	3_TTS	3365	1821710	1820321	-	NME3
chr16	1819344	1819491	MACS_peak_1157	59.19	1	chr16	1819150	1820881	53.33	MACS_peak_11001				MACS_peak_1157	3_TTS	2257	1821710	1820321	-	NME3
chr16	1819752	1819926	MACS_peak_1158	82.67	1	chr16	1819150	1820881	53.33	MACS_peak_11001				MACS_peak_1158	3_TTS	1834	1821710	1820321	-	NME3
chr16	1820043	1820182	MACS_peak_1159	61.58	1	chr16	1819150	1820881	53.33	MACS_peak_11001				MACS_peak_1159	3_TTS	1603	1821710	1820321	-	NME3
chr16	1820827	1821824	MACS_peak_1160	397.67	1	chr16	1819150	1820881	53.33	MACS_peak_11001				MACS_peak_1160	5_TSS	753	1821710	1820321	-	NME3
chr16	1827992	1828143	MACS_peak_1161	68.6	0	0	0	0	0	0				MACS_peak_1161	Intragenic	3784	1831823	1826739	-	SPSB3_dup1
chr16	1828742	1828887	MACS_peak_1162	50.42	0	0	0	0	0	0				MACS_peak_1162	Intragenic	2982	1831823	1826739	-	SPSB3_dup1
chr16	1831648	1831841	MACS_peak_1163	61.72	1	chr16	1830692	1834309	648.56	MACS_peak_11003				MACS_peak_1163	5_TSS	40	1831823	1826739	-	SPSB3_dup1
chr16	1831849	1832210	MACS_peak_1164	161.48	1	chr16	1830692	1834309	648.56	MACS_peak_11003				MACS_peak_1164	5_TSS	-293	1831823	1826739	-	SPSB3_dup1
chr16	2010534	2011037	MACS_peak_1165	157.35	1	chr16	2010056	2012527	110.69	MACS_peak_11007				MACS_peak_1165	Intragenic	1290	2009517	2011976	+	NDUFB10
chr16	2011129	2011508	MACS_peak_1166	134.3	1	chr16	2010056	2012527	110.69	MACS_peak_11007				MACS_peak_1166	3_TTS	1196	2012467	2012335	-	SNORA10
chr16	2011678	2011803	MACS_peak_1167	76.11	1	chr16	2010056	2012527	110.69	MACS_peak_11007				MACS_peak_1167	5_TSS	744	2012467	2012335	-	SNORA10
chr16	2029353	2029989	MACS_peak_1168	266.71	1	chr16	2028398	2030696	126.2	MACS_peak_11010				MACS_peak_1168	3_TTS	1994	2031550	2028918	-	NOXO1_dup1
chr16	2034596	2034700	MACS_peak_1169	57.83	1	chr16	2033301	2035263	90.91	MACS_peak_11011				MACS_peak_1169	5_TSS	488	2034150	2037750	+	GFER
chr16	2198791	2199349	MACS_peak_1170	177.07	1	chr16	2197577	2199988	135.44	MACS_peak_11015				MACS_peak_1170	5_TSS	524	2198651	2204141	+	RAB26_dup1
chr16	2199830	2199991	MACS_peak_1171	79.15	1	chr16	2197577	2199988	135.44	MACS_peak_11015				MACS_peak_1171	Intragenic	1261	2198651	2204141	+	RAB26_dup1
chr16	2200475	2200871	MACS_peak_1172	150.84	1	chr16	2199402	2202226	205.62	MACS_peak_11016				MACS_peak_1172	Intragenic	1974	2198651	2204141	+	RAB26_dup1
chr16	2200892	2201156	MACS_peak_1173	97.24	1	chr16	2199402	2202226	205.62	MACS_peak_11016				MACS_peak_1173	Intragenic	2288	2198651	2204141	+	RAB26_dup1
chr16	2201329	2201453	MACS_peak_1174	50.4	1	chr16	2199402	2202226	205.62	MACS_peak_11016				MACS_peak_1174	Intragenic	2726	2198651	2204141	+	RAB26_dup1
chr16	2201775	2201941	MACS_peak_1175	52.66	1	chr16	2199402	2202226	205.62	MACS_peak_11016				MACS_peak_1175	3_TTS	3213	2205106	2205024	-	SNORD60
chr16	2224360	2224509	MACS_peak_1176	59.13	0	0	0	0	0	0				MACS_peak_1176	3_TTS	22046	2246465	2227184	-	CASKIN1
chr16	2263883	2264067	MACS_peak_1177	69.03	1	chr16	2263925	2266295	185.28	MACS_peak_11020				MACS_peak_1177	5_TSS	801	2264822	2261603	-	PGP
chr16	2286568	2286712	MACS_peak_1178	50.63	0	0	0	0	0	0				MACS_peak_1178	5_TSS	161	2286468	2288712	+	DNASE1L2_dup1
chr16	2287176	2287320	MACS_peak_1179	50.63	1	chr16	2287704	2289375	58.17	MACS_peak_11022				MACS_peak_1179	5_TSS	805	2286468	2288712	+	DNASE1L2_dup1
chr16	2287957	2288391	MACS_peak_1180	175.91	1	chr16	2287704	2289375	58.17	MACS_peak_11022				MACS_peak_1180	3_TTS	1614	2286468	2288712	+	DNASE1L2_dup1
chr16	2301240	2301684	MACS_peak_1181	163.63	1	chr16	2300489	2303001	134.26	MACS_peak_11023				MACS_peak_1181	5_TSS	14	2301602	2289873	-	ECI1_dup1
chr16	2509256	2509485	MACS_peak_1182	66.91	1	chr16	2508944	2511210	225.15	MACS_peak_11026				MACS_peak_1182	5_TSS	-758	2510115	2514964	+	C16orf59
chr16	2509497	2509695	MACS_peak_1183	72.33	1	chr16	2508944	2511210	225.15	MACS_peak_11026				MACS_peak_1183	5_TSS	-516	2510115	2514964	+	C16orf59
chr16	2510265	2510422	MACS_peak_1184	56.48	1	chr16	2508944	2511210	225.15	MACS_peak_11026				MACS_peak_1184	5_TSS	262	2510115	2514964	+	C16orf59
chr16	2519989	2520168	MACS_peak_1185	81.56	0	0	0	0	0	0				MACS_peak_1185	5_TSS	-1382	2521500	2524146	+	NTN3
chr16	2570191	2570591	MACS_peak_1186	452.46	1	chr16	2569273	2571326	129.9	MACS_peak_11029				MACS_peak_1186	5_TSS	76	2570363	2579732	+	AMDHD2_dup1
chr16	2581422	2581580	MACS_peak_1187	63.06	1	chr16	2580938	2583441	232.84	MACS_peak_11030				MACS_peak_1187	5_TSS	-96	2581409	2580036	-	CEMP1
chr16	2581749	2582364	MACS_peak_1188	195.36	1	chr16	2580938	2583441	232.84	MACS_peak_11030				MACS_peak_1188	5_TSS	-28	2582006	2581923	-	MIR3178
chr16	2653350	2653884	MACS_peak_1189	427.31	1	chr16	2652364	2654460	246.2	MACS_peak_11032				MACS_peak_1189	5_TSS	232	2653385	2680495	+	LOC652276
chr16	2822694	2822845	MACS_peak_1190	55.29	0	0	0	0	0	0				MACS_peak_1190	Intragenic	4502	2827297	2821415	-	ELOB_dup1
chr16	2954476	2954735	MACS_peak_1191	101.4	1	chr16	2953710	2956851	382.88	MACS_peak_11046				MACS_peak_1191	5_Proximal	-7365	2961980	3001209	+	FLYWCH1_dup1
chr16	3020168	3020342	MACS_peak_1192	59.33	1	chr16	3018170	3021306	199.18	MACS_peak_11048				MACS_peak_1192	5_TSS	907	3019343	3023490	+	PAQR4_dup4
chr16	3030181	3030333	MACS_peak_1193	50.74	1	chr16	3029288	3031799	179.07	MACS_peak_11049				MACS_peak_1193	5_TSS	316	3030540	3022792	-	PKMYT1_dup1
chr16	3073127	3074353	MACS_peak_1194	765.7	1	chr16	3069412	3075262	1299.98	MACS_peak_11054				MACS_peak_1194	5_TSS	-82	3074020	3077756	+	THOC6_dup1
chr16	3174658	3174877	MACS_peak_1195	74.18	0	0	0	0	0	0				MACS_peak_1195	5_Proximal	-9185	3165599	3160461	-	ZNF205-AS1_dup1
chr16	3179437	3179728	MACS_peak_1196	155.21	1	chr16	3178594	3180504	54.13	MACS_peak_11060				MACS_peak_1196	Intragenic	5332	3184883	3175530	-	ZNF213-AS1
chr16	3508203	3508374	MACS_peak_1197	98	1	chr16	3506572	3508992	199.95	MACS_peak_11073				MACS_peak_1197	5_Distal	-14721	3493537	3482422	-	ZNF597
chr16	4664786	4664934	MACS_peak_1198	58.24	1	chr16	4663801	4665998	109.55	MACS_peak_11098				MACS_peak_1198	5_TSS	85	4664927	4658884	-	UBALD1_dup1
chr16	4743290	4743626	MACS_peak_1199	90.77	1	chr16	4742399	4744844	176.11	MACS_peak_11102				MACS_peak_1199	5_TSS	-361	4743694	4745860	+	NUDT16L1_dup1
chr16	4743701	4743976	MACS_peak_1200	106.03	1	chr16	4742399	4744844	176.11	MACS_peak_11102				MACS_peak_1200	5_TSS	109	4743694	4745860	+	NUDT16L1_dup1
chr16	4744112	4744484	MACS_peak_1201	132.56	1	chr16	4742399	4744844	176.11	MACS_peak_11102				MACS_peak_1201	5_TSS	656	4743694	4745860	+	NUDT16L1_dup1
chr16	4852753	4852879	MACS_peak_1202	51.79	1	chr16	4851289	4853795	158.74	MACS_peak_11106				MACS_peak_1202	5_TSS	152	4852951	4846963	-	ROGDI_dup1
chr16	4853055	4853241	MACS_peak_1203	89.91	1	chr16	4851289	4853795	158.74	MACS_peak_11106				MACS_peak_1203	5_TSS	-207	4852951	4846963	-	ROGDI_dup1
chr16	8746978	8747105	MACS_peak_1204	54.56	0	0	0	0	0	0				MACS_peak_1204	5_Distal	-21419	8768444	8878432	+	ABAT
chr16	8979811	8979951	MACS_peak_1205	51.51	0	0	0	0	0	0				MACS_peak_1205	5_Distal	-17039	8962869	8946799	-	CARHSP1_dup2
chr16	10579364	10579549	MACS_peak_1206	51.93	0	0	0	0	0	0				MACS_peak_1206	3_TTS	56730	10522725	10577495	+	ATF7IP2_dup3
chr16	11056329	11056445	MACS_peak_1207	52.04	0	0	0	0	0	0				MACS_peak_1207	5_Distal	-20152	11036257	11022748	-	DEXI
chr16	11452450	11452567	MACS_peak_1208	67.74	1	chr16	11450894	11452558	72.09	MACS_peak_11163				MACS_peak_1208	3_Proximal	13195	11439295	11445620	+	RMI2_dup1
chr16	11890814	11890997	MACS_peak_1209	57.2	1	chr16	11889664	11892578	253.49	MACS_peak_11172				MACS_peak_1209	5_TSS	186	11891114	11844442	-	ZC3H7A
chr16	19394135	19394274	MACS_peak_1210	51.73	0	0	0	0	0	0				MACS_peak_1210	5_Distal	-27687	19421861	19510434	+	TMC5
chr16	21335878	21335995	MACS_peak_1211	57.15	0	0	0	0	0	0				MACS_peak_1211	5_Distal	-21464	21314457	21269839	-	CRYM
chr16	22201019	22201171	MACS_peak_1212	51.2	1	chr16	22200946	22203988	440.94	MACS_peak_11266				MACS_peak_1212	5_Distal	-16456	22217592	22300066	+	EEF2K
chr16	23521567	23521866	MACS_peak_1213	110.93	1	chr16	23520484	23522840	167.87	MACS_peak_11279				MACS_peak_1213	5_TSS	134	23521815	23474863	-	GGA2
chr16	25286996	25287123	MACS_peak_1214	54.56	0	0	0	0	0	0				MACS_peak_1214	5_Distal	-18189	25268855	25247322	-	ZKSCAN2
chr16	27470030	27470174	MACS_peak_1215	56.94	0	0	0	0	0	0				MACS_peak_1215	5_Proximal	-5411	27464714	27458991	-	IL21R-AS1
chr16	28833745	28834055	MACS_peak_1216	80.6	1	chr16	28832525	28837079	1011.94	MACS_peak_11307				MACS_peak_1216	5_TSS	-577	28834369	28848558	+	ATXN2L_dup1
chr16	28985980	28986259	MACS_peak_1217	79.13	1	chr16	28984583	28987126	207.09	MACS_peak_11313				MACS_peak_1217	5_TSS	31	28986096	28995869	+	SPNS1_dup1
chr16	29125496	29125625	MACS_peak_1218	52.04	0	0	0	0	0	0				MACS_peak_1218	Intragenic	39413	29086163	29128038	+	RRN3P2
chr16	29816127	29816457	MACS_peak_1219	94.82	1	chr16	29815165	29818441	594.54	MACS_peak_11317				MACS_peak_1219	5_TSS	-1198	29817417	29822504	+	MAZ
chr16	29816482	29817113	MACS_peak_1220	348.52	1	chr16	29815165	29818441	594.54	MACS_peak_11317				MACS_peak_1220	5_TSS	-559	29817417	29822504	+	MAZ
chr16	29819117	29819390	MACS_peak_1221	69.6	1	chr16	29817454	29820459	163.28	MACS_peak_11318				MACS_peak_1221	3_TTS	17217	29802034	29816706	+	KIF22_dup1
chr16	29822489	29823175	MACS_peak_1222	328.62	1	chr16	29821558	29824446	273.29	MACS_peak_11319				MACS_peak_1222	5_TSS	-535	29823409	29827202	+	PRRT2_dup1
chr16	29827253	29827476	MACS_peak_1223	82.11	1	chr16	29825918	29829430	386.8	MACS_peak_11320				MACS_peak_1223	5_TSS	-237	29827528	29833816	+	PAGR1
chr16	29827481	29827779	MACS_peak_1224	67.03	1	chr16	29825918	29829430	386.8	MACS_peak_11320				MACS_peak_1224	5_TSS	204	29827528	29833816	+	PAGR1
chr16	29868210	29868408	MACS_peak_1225	95.53	0	0	0	0	0	0				MACS_peak_1225	3_TTS	6276	29874609	29869677	-	CDIPT_dup1
chr16	29919443	29919572	MACS_peak_1226	62.63	0	0	0	0	0	0				MACS_peak_1226	3_TTS	7383	29912147	29917377	+	ASPHD1
chr16	29985154	29985464	MACS_peak_1227	58.73	1	chr16	29983841	29986348	158.13	MACS_peak_11329				MACS_peak_1227	5_TSS	63	29985188	30003582	+	TAOK2_dup1
chr16	30006616	30006869	MACS_peak_1228	70	1	chr16	30005302	30009087	543.6	MACS_peak_11330				MACS_peak_1228	5_TSS	639	30007417	30003642	-	HIRIP3_dup1
chr16	30018626	30018903	MACS_peak_1229	109.14	0	0	0	0	0	0				MACS_peak_1229	3_TTS	11202	30007530	30017115	+	INO80E_dup5
chr16	30367224	30367511	MACS_peak_1230	66.08	1	chr16	30365092	30368406	208.62	MACS_peak_11341				MACS_peak_1230	5_TSS	-625	30366682	30362087	-	CD2BP2
chr16	30395025	30395177	MACS_peak_1231	68.34	0	0	0	0	0	0				MACS_peak_1231	5_TSS	-960	30394171	30389454	-	2017-09-01
chr16	30411640	30411838	MACS_peak_1232	57.93	0	0	0	0	0	0				MACS_peak_1232	3_TTS	4954	30406740	30411429	+	ZNF48_dup4
chr16	30428767	30429852	MACS_peak_1233	373.48	1	chr16	30427524	30430464	155.15	MACS_peak_11346				MACS_peak_1233	3_TTS	2191	30431080	30430946	-	SNORA80C
chr16	30492756	30492968	MACS_peak_1234	63.31	0	0	0	0	0	0				MACS_peak_1234	5_Distal	-22383	30515240	30515322	+	MIR4518
chr16	30582922	30583160	MACS_peak_1235	110.56	1	chr16	30581700	30584646	373.87	MACS_peak_11354				MACS_peak_1235	5_TSS	615	30583728	30581019	-	ZNF688_dup1
chr16	30583449	30583678	MACS_peak_1236	92.26	1	chr16	30581700	30584646	373.87	MACS_peak_11354				MACS_peak_1236	5_TSS	100	30583728	30581019	-	ZNF688_dup1
chr16	30583836	30583969	MACS_peak_1237	61.31	1	chr16	30581700	30584646	373.87	MACS_peak_11354				MACS_peak_1237	5_TSS	-196	30583728	30581019	-	ZNF688_dup1
chr16	30670611	30670880	MACS_peak_1238	74.19	1	chr16	30668172	30672868	678.04	MACS_peak_11359				MACS_peak_1238	5_TSS	-104	30670840	30682131	+	FBRS
chr16	30759253	30759552	MACS_peak_1239	76.49	1	chr16	30757918	30761066	203.87	MACS_peak_11362				MACS_peak_1239	5_TSS	-240	30759620	30772497	+	PHKG2_dup1
chr16	30759882	30760084	MACS_peak_1240	58.99	1	chr16	30757918	30761066	203.87	MACS_peak_11362				MACS_peak_1240	5_TSS	340	30759620	30772497	+	PHKG2_dup1
chr16	30786497	30787702	MACS_peak_1241	1613.31	1	chr16	30785679	30788310	396.9	MACS_peak_11364				MACS_peak_1241	3_TTS	11572	30798540	30789776	-	ZNF629_dup1
chr16	30788906	30789167	MACS_peak_1242	86.62	0	0	0	0	0	0				MACS_peak_1242	3_TTS	9487	30798540	30789776	-	ZNF629_dup1
chr16	30790197	30790342	MACS_peak_1243	73.29	0	0	0	0	0	0				MACS_peak_1243	3_TTS	8244	30798540	30789776	-	ZNF629_dup1
chr16	30886318	30886756	MACS_peak_1244	124.24	1	chr16	30885243	30888421	198.88	MACS_peak_11371				MACS_peak_1244	5_TSS	131	30886644	30886587	-	MIR4519
chr16	30960257	30960932	MACS_peak_1245	291.92	1	chr16	30959010	30961852	122.66	MACS_peak_11374				MACS_peak_1245	5_TSS	174	30960405	30966259	+	ORAI3
chr16	30968316	30968581	MACS_peak_1246	56.83	1	chr16	30967460	30970851	345.83	MACS_peak_11375				MACS_peak_1246	5_TSS	-262	30968615	30995983	+	SETD1A
chr16	30968907	30969074	MACS_peak_1247	53.31	1	chr16	30967460	30970851	345.83	MACS_peak_11375				MACS_peak_1247	5_TSS	339	30968615	30995983	+	SETD1A
chr16	31124409	31124585	MACS_peak_1248	68.17	0	0	0	0	0	0				MACS_peak_1248	5_TSS	-4529	31128985	31142714	+	KAT8_dup1
chr16	31124828	31124996	MACS_peak_1249	56.18	0	0	0	0	0	0				MACS_peak_1249	5_TSS	-4109	31128985	31142714	+	KAT8_dup1
chr16	31128916	31129146	MACS_peak_1250	65.47	1	chr16	31127881	31130699	468.54	MACS_peak_11383				MACS_peak_1250	5_TSS	48	31128985	31142714	+	KAT8_dup1
chr16	31137189	31137358	MACS_peak_1251	52.28	0	0	0	0	0	0				MACS_peak_1251	Intragenic	8268	31128985	31142714	+	KAT8_dup1
chr16	31209650	31209826	MACS_peak_1252	91.02	0	0	0	0	0	0				MACS_peak_1252	5_TSS	-3426	31213206	31214773	+	PYCARD-AS1
chr16	31212755	31212908	MACS_peak_1253	52.54	0	0	0	0	0	0				MACS_peak_1253	5_TSS	-348	31213206	31214773	+	PYCARD-AS1
chr16	31500333	31500466	MACS_peak_1254	53.11	0	0	0	0	0	0				MACS_peak_1254	3_TTS	19324	31519740	31500796	-	C16orf58
chr16	31724562	31725237	MACS_peak_1255	379.85	1	chr16	31723836	31726084	118.66	MACS_peak_11393				MACS_peak_1255	5_TSS	175	31724550	31772886	+	ZNF720
chr16	32547985	32548078	MACS_peak_1256	54.89	0	0	0	0	0	0				MACS_peak_1256	Intergenic	139400	32687430	32684849	-	TP53TG3F
chr16	46823925	46824196	MACS_peak_1257	68.29	0	0	0	0	0	0				MACS_peak_1257	5_Distal	-26941	46797158	46736194	-	MYLK3
chr16	47241990	47242159	MACS_peak_1258	53.58	0	0	0	0	0	0				MACS_peak_1258	3_Distal	64074	47177979	47196657	+	ITFG1-AS1_dup1
chr16	57499071	57499194	MACS_peak_1259	50.65	0	0	0	0	0	0				MACS_peak_1259	3_TTS	17806	57481337	57495187	+	COQ9
chr16	58191708	58191861	MACS_peak_1260	58.2	0	0	0	0	0	0				MACS_peak_1260	5_Distal	-28499	58163329	58147492	-	CFAP20
chr16	58192171	58192309	MACS_peak_1261	61.84	0	0	0	0	0	0				MACS_peak_1261	5_Distal	-28935	58163329	58147492	-	CFAP20
chr16	58549222	58549653	MACS_peak_1262	134.99	1	chr16	58548319	58550977	238.98	MACS_peak_11536				MACS_peak_1262	5_TSS	-66	58549383	58554436	+	SETD6_dup1
chr16	58549667	58550106	MACS_peak_1263	248.69	1	chr16	58548319	58550977	238.98	MACS_peak_11536				MACS_peak_1263	5_TSS	470	58549383	58554436	+	SETD6_dup1
chr16	58550117	58550387	MACS_peak_1264	63.47	1	chr16	58548319	58550977	238.98	MACS_peak_11536				MACS_peak_1264	5_TSS	919	58549383	58554436	+	SETD6_dup1
chr16	58736679	58736819	MACS_peak_1265	51.51	0	0	0	0	0	0				MACS_peak_1265	5_Distal	-18042	58718681	58699013	-	SLC38A7
chr16	65812043	65812176	MACS_peak_1266	55.61	0	0	0	0	0	0				MACS_peak_1266	Intergenic	-201883	65610203	65318402	-	LINC00922
chr16	66963954	66964138	MACS_peak_1267	51.8	0	0	0	0	0	0				MACS_peak_1267	3_TTS	4279	66968326	66965958	-	FAM96B_dup1
chr16	66978853	66978962	MACS_peak_1268	70.29	0	0	0	0	0	0				MACS_peak_1268	3_TTS	10546	66968374	66978994	+	CES2_dup2
chr16	66979700	66979818	MACS_peak_1269	52.04	0	0	0	0	0	0				MACS_peak_1269	3_TTS	11393	66968374	66978994	+	CES2_dup2
chr16	66985362	66985580	MACS_peak_1270	59.18	0	0	0	0	0	0				MACS_peak_1270	5_Proximal	-9662	66995132	67009052	+	CES3_dup1
chr16	67140413	67140551	MACS_peak_1271	50.97	0	0	0	0	0	0				MACS_peak_1271	5_TSS	-3348	67143796	67182447	+	C16orf70_dup1
chr16	67212087	67212326	MACS_peak_1272	51.02	1	chr16	67211307	67213246	79.82	MACS_peak_11592				MACS_peak_1272	3_TTS	4455	67207756	67209640	+	NOL3_dup4
chr16	67232893	67233163	MACS_peak_1273	89.05	1	chr16	67231915	67234583	235.03	MACS_peak_11594				MACS_peak_1273	5_TSS	2	67233028	67237927	+	ELMO3
chr16	67233277	67233450	MACS_peak_1274	55.6	1	chr16	67231915	67234583	235.03	MACS_peak_11594				MACS_peak_1274	5_TSS	339	67233028	67237927	+	ELMO3
chr16	67304834	67305022	MACS_peak_1275	98.03	0	0	0	0	0	0				MACS_peak_1275	5_Proximal	-7169	67312060	67323403	+	PLEKHG4
chr16	67305242	67305656	MACS_peak_1276	151.54	0	0	0	0	0	0				MACS_peak_1276	5_Proximal	-6721	67312060	67323403	+	PLEKHG4
chr16	67305750	67305890	MACS_peak_1277	50.52	0	0	0	0	0	0				MACS_peak_1277	5_Proximal	-6218	67312060	67323403	+	PLEKHG4
chr16	67700249	67700395	MACS_peak_1278	50.21	0	0	0	0	0	0				MACS_peak_1278	5_TSS	-429	67700717	67702661	+	C16orf86
chr16	67795000	67795152	MACS_peak_1279	57.31	0	0	0	0	0	0				MACS_peak_1279	5_Distal	-41788	67753273	67708436	-	GFOD2_dup1
chr16	67906600	67907415	MACS_peak_1280	480.71	1	chr16	67905844	67908066	177.76	MACS_peak_11613				MACS_peak_1280	5_TSS	6	67906926	67918417	+	EDC4
chr16	67969228	67969674	MACS_peak_1281	193.46	1	chr16	67968617	67971919	260.25	MACS_peak_11615				MACS_peak_1281	3_TTS	1408	67970780	67968407	-	PSMB10
chr16	67969779	67970577	MACS_peak_1282	346.11	1	chr16	67968617	67971919	260.25	MACS_peak_11615				MACS_peak_1282	5_TSS	327	67970780	67968407	-	PSMB10
chr16	68260872	68261002	MACS_peak_1283	53.82	0	0	0	0	0	0				MACS_peak_1283	3_TTS	9220	68270136	68262450	-	ESRP2
chr16	68573201	68573394	MACS_peak_1284	59.05	0	0	0	0	0	0				MACS_peak_1284	5_TSS	152	68573116	68601039	+	ZFP90_dup1
chr16	69140283	69140453	MACS_peak_1285	52.78	0	0	0	0	0	0				MACS_peak_1285	5_TSS	239	69140129	69152619	+	HAS3_dup1
chr16	69345398	69345528	MACS_peak_1286	51.08	1	chr16	69344310	69346532	106.64	MACS_peak_11644				MACS_peak_1286	5_TSS	192	69345287	69358946	+	VPS4A
chr16	69345533	69345737	MACS_peak_1287	51.93	1	chr16	69344310	69346532	106.64	MACS_peak_11644				MACS_peak_1287	5_TSS	353	69345287	69358946	+	VPS4A
chr16	69356283	69356407	MACS_peak_1288	55.31	0	0	0	0	0	0				MACS_peak_1288	3_Proximal	8168	69364498	69362524	-	PDF
chr16	69362318	69362546	MACS_peak_1289	79.56	1	chr16	69362896	69365570	174.69	MACS_peak_11645				MACS_peak_1289	3_TTS	2073	69364498	69362524	-	PDF
chr16	69363305	69363577	MACS_peak_1290	88.08	1	chr16	69362896	69365570	174.69	MACS_peak_11645				MACS_peak_1290	3_TTS	1110	69364498	69362524	-	PDF
chr16	69363867	69364621	MACS_peak_1291	395.64	1	chr16	69362896	69365570	174.69	MACS_peak_11645				MACS_peak_1291	5_TSS	-11	69364498	69362524	-	PDF
chr16	69834120	69834256	MACS_peak_1292	52.04	0	0	0	0	0	0				MACS_peak_1292	5_Distal	-45344	69788871	69775757	-	NOB1_dup1
chr16	70184305	70184445	MACS_peak_1293	50.52	0	0	0	0	0	0				MACS_peak_1293	3_Proximal	23001	70207351	70190243	-	LOC400541
chr16	70285322	70286065	MACS_peak_1294	620.58	1	chr16	70284260	70285971	53.1	MACS_peak_11658				MACS_peak_1294	5_TSS	8	70285833	70284134	-	EXOSC6
chr16	70414240	70414540	MACS_peak_1295	86.59	1	chr16	70413601	70416725	240.61	MACS_peak_11663				MACS_peak_1295	3_Proximal	33673	70380732	70407286	+	DDX19A_dup1
chr16	70609901	70610130	MACS_peak_1296	87.19	0	0	0	0	0	0				MACS_peak_1296	5_TSS	-3809	70613798	70694585	+	IL34_dup1
chr16	71759531	71759680	MACS_peak_1297	59.13	0	0	0	0	0	0				MACS_peak_1297	5_TSS	-1025	71758604	71678829	-	PHLPP2_dup1
chr16	72857281	72857429	MACS_peak_1298	53.48	0	0	0	0	0	0				MACS_peak_1298	Intragenic	235155	73092534	72816786	-	ZFHX3_dup1
chr16	74353119	74353319	MACS_peak_1299	70.2	0	0	0	0	0	0				MACS_peak_1299	3_Distal	22595	74330673	74340186	+	PSMD7
chr16	75284994	75285409	MACS_peak_1300	200.68	0	0	0	0	0	0				MACS_peak_1300	5_TSS	-3026	75282224	75262928	-	BCAR1_dup1
chr16	75466927	75467232	MACS_peak_1301	91.38	1	chr16	75465946	75468635	152.12	MACS_peak_11726				MACS_peak_1301	5_TSS	228	75467387	75327608	-	CFDP1
chr16	75657304	75657414	MACS_peak_1302	53.69	1	chr16	75656031	75658244	129.2	MACS_peak_11729				MACS_peak_1302	5_TSS	-133	75657221	75630777	-	ADAT1_dup1
chr16	77277246	77277378	MACS_peak_1303	52.56	0	0	0	0	0	0				MACS_peak_1303	3_Distal	43987	77233294	77246901	+	SYCE1L_dup1
chr16	80839681	80839818	MACS_peak_1304	50.96	0	0	0	0	0	0				MACS_peak_1304	5_TSS	-1554	80838175	80631796	-	CDYL2
chr16	84486766	84486907	MACS_peak_1305	51.29	0	0	0	0	0	0				MACS_peak_1305	Intragenic	46671	84440194	84497793	+	ATP2C2_dup2
chr16	84536935	84537098	MACS_peak_1306	51.18	0	0	0	0	0	0				MACS_peak_1306	Intragenic	1238	84538288	84509966	-	TLDC1
chr16	85710812	85710953	MACS_peak_1307	54.96	0	0	0	0	0	0				MACS_peak_1307	3_TTS	11739	85722588	85711280	-	GINS2
chr16	85712238	85712406	MACS_peak_1308	56.18	0	0	0	0	0	0				MACS_peak_1308	Intragenic	10286	85722588	85711280	-	GINS2
chr16	85713387	85713648	MACS_peak_1309	91.16	0	0	0	0	0	0				MACS_peak_1309	Intragenic	9161	85722588	85711280	-	GINS2
chr16	87351061	87351496	MACS_peak_1310	100.58	1	chr16	87349583	87352244	119.63	MACS_peak_11866				MACS_peak_1310	5_TSS	245	87351115	87351649	+	LOC101928659
chr16	87799257	87799476	MACS_peak_1311	91.36	1	chr16	87798256	87800984	389.35	MACS_peak_11873				MACS_peak_1311	5_TSS	223	87799598	87741418	-	KLHDC4_dup1
chr16	87859079	87859215	MACS_peak_1312	52.41	0	0	0	0	0	0				MACS_peak_1312	3_TTS	43930	87903105	87863622	-	SLC7A5
chr16	88707678	88707802	MACS_peak_1313	54.31	0	0	0	0	0	0				MACS_peak_1313	3_TTS	2725	88705001	88706882	+	IL17C
chr16	88708404	88708822	MACS_peak_1314	131.83	0	0	0	0	0	0				MACS_peak_1314	3_TTS	3491	88705001	88706882	+	IL17C
chr16	88773175	88773303	MACS_peak_1315	50.02	1	chr16	88771654	88773948	373.52	MACS_peak_11889				MACS_peak_1315	5_TSS	384	88772871	88781786	+	CTU2_dup1
chr16	88876043	88876170	MACS_peak_1316	53.35	1	chr16	88874720	88877024	98.61	MACS_peak_11893				MACS_peak_1316	3_TTS	2223	88878342	88875877	-	APRT_dup1
chr16	88880073	88880263	MACS_peak_1317	86.18	1	chr16	88876867	88879746	205.25	MACS_peak_11894				MACS_peak_1317	5_TSS	-1870	88878342	88875877	-	APRT_dup1
chr16	89113979	89114124	MACS_peak_1318	50.42	0	0	0	0	0	0				MACS_peak_1318	5_Distal	-46146	89160217	89222254	+	ACSF3_dup1
chr16	89221204	89221390	MACS_peak_1319	78.25	0	0	0	0	0	0				MACS_peak_1319	5_TSS	-4322	89225628	89230083	+	LINC00304
chr16	89221745	89221892	MACS_peak_1320	59.6	0	0	0	0	0	0				MACS_peak_1320	5_TSS	-3823	89225628	89230083	+	LINC00304
chr16	89222659	89222965	MACS_peak_1321	149.37	0	0	0	0	0	0				MACS_peak_1321	5_TSS	-2735	89225628	89230083	+	LINC00304
chr16	89631184	89631373	MACS_peak_1322	65.15	1	chr16	89630284	89633611	421.1	MACS_peak_11909				MACS_peak_1322	3_TTS	3448	89627838	89627909	+	SNORD68
chr16	89631387	89632403	MACS_peak_1323	458.26	1	chr16	89630284	89633611	421.1	MACS_peak_11909				MACS_peak_1323	3_TTS	4138	89627838	89627909	+	SNORD68
chr16	89632406	89632695	MACS_peak_1324	131.89	1	chr16	89630284	89633611	421.1	MACS_peak_11909				MACS_peak_1324	3_TTS	4657	89627838	89627909	+	SNORD68
chr16	89635727	89635835	MACS_peak_1325	59.69	0	0	0	0	0	0				MACS_peak_1325	5_Proximal	-6383	89642176	89663654	+	CPNE7_dup1
chr16	89661874	89662046	MACS_peak_1326	54.12	0	0	0	0	0	0				MACS_peak_1326	5_Distal	-17749	89679716	89704839	+	DPEP1
chr16	89763198	89763354	MACS_peak_1327	57.52	0	0	0	0	0	0				MACS_peak_1327	3_TTS	10168	89753076	89762772	+	CDK10_dup1
chr16	89785004	89785145	MACS_peak_1328	51.29	1	chr16	89783877	89785708	69.99	MACS_peak_11918				MACS_peak_1328	5_TSS	-1682	89786776	89806312	+	ZNF276
chr16	89785822	89786088	MACS_peak_1329	139.22	1	chr16	89784919	89789647	752.01	MACS_peak_11919				MACS_peak_1329	5_TSS	-783	89786776	89806312	+	ZNF276
chr16	89786384	89786517	MACS_peak_1330	53.11	1	chr16	89784919	89789647	752.01	MACS_peak_11919				MACS_peak_1330	5_TSS	-357	89786776	89806312	+	ZNF276
chr16	89786539	89787551	MACS_peak_1331	1070.43	1	chr16	89784919	89789647	752.01	MACS_peak_11919				MACS_peak_1331	5_TSS	-87	89786776	89806312	+	ZNF276
chr16	89787589	89787879	MACS_peak_1332	101.37	1	chr16	89784919	89789647	752.01	MACS_peak_11919				MACS_peak_1332	5_TSS	-233	89787950	89806312	+	ZNF276_dup4
chr16	89787920	89788247	MACS_peak_1333	121.52	1	chr16	89784919	89789647	752.01	MACS_peak_11919				MACS_peak_1333	5_TSS	237	89787952	89807332	+	ZNF276_dup5
chr16	89788253	89788667	MACS_peak_1334	132.06	1	chr16	89784919	89789647	752.01	MACS_peak_11919				MACS_peak_1334	5_TSS	388	89787952	89807332	+	ZNF276_dup5
chr16	89808026	89808233	MACS_peak_1335	65.38	0	0	0	0	0	0				MACS_peak_1335	3_TTS	20168	89787952	89807332	+	ZNF276_dup5
chr16	89894807	89894919	MACS_peak_1336	53.57	1	chr16	89893156	89896022	140.29	MACS_peak_11921				MACS_peak_1336	5_Distal	-11787	89883065	89864767	-	FANCA_dup2
chr16	90071050	90071259	MACS_peak_1337	74.29	0	0	0	0	0	0				MACS_peak_1337	3_TTS	5384	90076529	90071273	-	DBNDD1
chr16	90113075	90113217	MACS_peak_1338	80.24	0	0	0	0	0	0				MACS_peak_1338	5_TSS	912	90114033	90106169	-	URAHP
chr17	417829	417996	MACS_peak_1339	64.65	0	0	0	0	0	0				MACS_peak_1339	Intragenic	200173	618096	411908	-	VPS53
chr17	694241	694390	MACS_peak_1340	59.13	0	0	0	0	0	0				MACS_peak_1340	5_Proximal	-8724	685571	662549	-	GLOD4
chr17	1317577	1317718	MACS_peak_1341	51.29	0	0	0	0	0	0				MACS_peak_1341	5_Distal	-14112	1303556	1247834	-	YWHAE_dup1
chr17	1340707	1340890	MACS_peak_1342	61.1	0	0	0	0	0	0				MACS_peak_1342	Intragenic	18750	1359561	1324647	-	CRK_dup1
chr17	1365831	1366056	MACS_peak_1343	51.93	1	chr17	1365214	1367154	76.6	MACS_peak_11959				MACS_peak_1343	5_Proximal	-6414	1359561	1324647	-	CRK_dup1
chr17	1366081	1366303	MACS_peak_1344	73.06	1	chr17	1365214	1367154	76.6	MACS_peak_11959				MACS_peak_1344	5_Proximal	-6619	1359561	1324647	-	CRK_dup1
chr17	1388706	1388901	MACS_peak_1345	65.16	1	chr17	1387268	1390351	183.01	MACS_peak_11960				MACS_peak_1345	5_TSS	267	1389051	1367480	-	MYO1C
chr17	1391534	1391720	MACS_peak_1346	72.69	1	chr17	1390681	1392548	129.67	MACS_peak_11961				MACS_peak_1346	5_TSS	-2530	1389051	1367480	-	MYO1C
chr17	1419858	1420570	MACS_peak_1347	291.92	1	chr17	1418862	1421208	137.31	MACS_peak_11963				MACS_peak_1347	5_TSS	53	1420213	1421390	+	PITPNA-AS1
chr17	1552975	1553254	MACS_peak_1348	106.08	1	chr17	1551431	1553785	137.47	MACS_peak_11972				MACS_peak_1348	5_TSS	185	1553392	1549445	-	RILP
chr17	1614147	1614446	MACS_peak_1349	125.78	1	chr17	1612661	1614894	181.4	MACS_peak_11974				MACS_peak_1349	5_TSS	-668	1613662	1606084	-	TLCD2
chr17	1944702	1944858	MACS_peak_1350	67.32	1	chr17	1944402	1946372	128.24	MACS_peak_11980				MACS_peak_1350	5_TSS	-476	1945277	1946725	+	OVCA2
chr17	1945098	1945275	MACS_peak_1351	84.42	1	chr17	1944402	1946372	128.24	MACS_peak_11980				MACS_peak_1351	5_TSS	-97	1945277	1946725	+	OVCA2
chr17	1945301	1945703	MACS_peak_1352	183.71	1	chr17	1944402	1946372	128.24	MACS_peak_11980				MACS_peak_1352	5_TSS	125	1945277	1946725	+	OVCA2
chr17	2591999	2592359	MACS_peak_1353	125.79	0	0	0	0	0	0				MACS_peak_1353	3_TTS	4114	2596213	2596155	-	MIR6776
chr17	2592989	2593109	MACS_peak_1354	52.04	0	0	0	0	0	0				MACS_peak_1354	3_TTS	3147	2596213	2596155	-	MIR6776
chr17	3564726	3564917	MACS_peak_1355	53.47	0	0	0	0	0	0				MACS_peak_1355	3_TTS	7180	3571973	3566187	-	TAX1BP3_dup1
chr17	4167053	4167342	MACS_peak_1356	90.48	1	chr17	4166183	4168416	149.58	MACS_peak_12008				MACS_peak_1356	5_TSS	-3	4167290	4067112	-	ANKFY1_dup1
chr17	4437797	4437985	MACS_peak_1357	54.09	0	0	0	0	0	0				MACS_peak_1357	3_TTS	20798	4458681	4442191	-	MYBBP1A_dup1
chr17	4438450	4438684	MACS_peak_1358	97.53	0	0	0	0	0	0				MACS_peak_1358	3_TTS	20173	4458681	4442191	-	MYBBP1A_dup1
chr17	4439147	4439280	MACS_peak_1359	52.04	0	0	0	0	0	0				MACS_peak_1359	3_TTS	19459	4458681	4442191	-	MYBBP1A_dup1
chr17	4847874	4848016	MACS_peak_1360	60.74	1	chr17	4847420	4849684	190.88	MACS_peak_12027				MACS_peak_1360	3_TTS	4441	4852381	4848945	-	PFN1
chr17	5087208	5087405	MACS_peak_1361	77.05	0	0	0	0	0	0				MACS_peak_1361	Intragenic	7905	5095178	5082831	-	ZNF594
chr17	6544342	6544590	MACS_peak_1362	78.63	1	chr17	6542904	6545655	229.7	MACS_peak_12052				MACS_peak_1362	5_TSS	-267	6544247	6481645	-	KIAA0753
chr17	6544610	6544898	MACS_peak_1363	113.57	1	chr17	6542904	6545655	229.7	MACS_peak_12052				MACS_peak_1363	5_TSS	-459	6544247	6481645	-	KIAA0753
chr17	7123361	7123792	MACS_peak_1364	184.4	1	chr17	7122285	7125161	144.64	MACS_peak_12062				MACS_peak_1364	5_TSS	-72	7123369	7093210	-	DLG4_dup4
chr17	7123820	7124069	MACS_peak_1365	65.43	1	chr17	7122285	7125161	144.64	MACS_peak_12062				MACS_peak_1365	5_TSS	-554	7123369	7093210	-	DLG4_dup4
chr17	7137515	7138204	MACS_peak_1366	373.69	1	chr17	7136612	7139092	212.94	MACS_peak_12063				MACS_peak_1366	5_TSS	29	7137863	7128661	-	DVL2
chr17	7145651	7146647	MACS_peak_1367	465.59	1	chr17	7144725	7147299	365.88	MACS_peak_12066				MACS_peak_1367	5_TSS	-611	7145753	7143738	-	GABARAP
chr17	7155634	7155913	MACS_peak_1368	71.44	1	chr17	7154183	7157448	349.49	MACS_peak_12067				MACS_peak_1368	5_TSS	-64	7155745	7163259	+	ELP5_dup4
chr17	7155969	7156213	MACS_peak_1369	90.67	1	chr17	7154183	7157448	349.49	MACS_peak_12067				MACS_peak_1369	5_TSS	309	7155745	7163259	+	ELP5_dup4
chr17	7165035	7165258	MACS_peak_1370	85.47	1	chr17	7163642	7167736	419.96	MACS_peak_12068				MACS_peak_1370	3_TTS	10088	7155056	7163259	+	ELP5
chr17	7218048	7218258	MACS_peak_1371	61.83	1	chr17	7217590	7219727	175.49	MACS_peak_12071				MACS_peak_1371	5_TSS	497	7218658	7215978	-	GPS2
chr17	7218405	7218930	MACS_peak_1372	183.38	1	chr17	7217590	7219727	175.49	MACS_peak_12071				MACS_peak_1372	5_TSS	-148	7218658	7215978	-	GPS2
chr17	7284364	7284544	MACS_peak_1373	60	0	0	0	0	0	0				MACS_peak_1373	5_TSS	171	7284293	7293092	+	TNK1_dup1
chr17	7359663	7359824	MACS_peak_1374	74.86	1	chr17	7357954	7360028	73.25	MACS_peak_12077				MACS_peak_1374	Intragenic	11342	7348406	7360932	+	CHRNB1
chr17	7360026	7360211	MACS_peak_1375	84.57	1	chr17	7357954	7360028	73.25	MACS_peak_12077				MACS_peak_1375	3_TTS	11668	7348406	7360932	+	CHRNB1
chr17	7382758	7382935	MACS_peak_1376	67.93	1	chr17	7381411	7384330	265.79	MACS_peak_12078				MACS_peak_1376	5_TSS	-1835	7384721	7386383	+	SLC35G6
chr17	7475884	7476277	MACS_peak_1377	88.74	1	chr17	7474703	7478069	477.46	MACS_peak_12081				MACS_peak_1377	5_TSS	-60	7476024	7482324	+	EIF4A1_dup1
chr17	7482478	7482938	MACS_peak_1378	134.99	1	chr17	7481794	7483874	212.25	MACS_peak_12082				MACS_peak_1378	5_TSS	-9	7482805	7485429	+	CD68
chr17	7482944	7483447	MACS_peak_1379	158.54	1	chr17	7481794	7483874	212.25	MACS_peak_12082				MACS_peak_1379	5_TSS	238	7482806	7485429	+	CD68_dup1
chr17	7759689	7759815	MACS_peak_1380	75.15	1	chr17	7759411	7762485	208.69	MACS_peak_12096				MACS_peak_1380	5_TSS	-1307	7761045	7765601	+	CYB5D1_dup1
chr17	7759883	7760332	MACS_peak_1381	143.1	1	chr17	7759411	7762485	208.69	MACS_peak_12096				MACS_peak_1381	5_TSS	-763	7761045	7765601	+	CYB5D1_dup1
chr17	7760386	7760877	MACS_peak_1382	126.84	1	chr17	7759411	7762485	208.69	MACS_peak_12096				MACS_peak_1382	5_TSS	-419	7761045	7765601	+	CYB5D1_dup1
chr17	7761027	7761487	MACS_peak_1383	107.05	1	chr17	7759411	7762485	208.69	MACS_peak_12096				MACS_peak_1383	5_TSS	-42	7761209	7759999	-	NAA38_dup1
chr17	8130149	8130295	MACS_peak_1384	54.36	1	chr17	8128874	8131138	188.15	MACS_peak_12119				MACS_peak_1384	5_TSS	-2885	8127361	8123948	-	LINC00324
chr17	8279498	8279706	MACS_peak_1385	63.83	0	0	0	0	0	0				MACS_peak_1385	5_TSS	426	8280029	8271971	-	KRBA2
chr17	8279720	8280203	MACS_peak_1386	562.38	0	0	0	0	0	0				MACS_peak_1386	5_TSS	38	8280029	8271971	-	KRBA2
chr17	16346376	16346578	MACS_peak_1387	100.52	1	chr17	16344595	16347527	207.43	MACS_peak_12214				MACS_peak_1387	3_TTS	1973	16344540	16344612	+	SNORD65
chr17	16346981	16347326	MACS_peak_1388	129.25	1	chr17	16344595	16347527	207.43	MACS_peak_12214				MACS_peak_1388	3_TTS	2674	16344540	16344612	+	SNORD65
chr17	16348038	16348179	MACS_peak_1389	61.07	0	0	0	0	0	0				MACS_peak_1389	3_TTS	3593	16344540	16344612	+	SNORD65
chr17	16353527	16353663	MACS_peak_1390	61.93	0	0	0	0	0	0				MACS_peak_1390	3_Proximal	9030	16344540	16344612	+	SNORD65
chr17	17099007	17099171	MACS_peak_1391	65.36	0	0	0	0	0	0				MACS_peak_1391	3_TTS	152975	16946074	17095962	+	MPRIP_dup1
chr17	17100676	17100891	MACS_peak_1392	71.82	0	0	0	0	0	0				MACS_peak_1392	3_TTS	8859	17109646	17104309	-	PLD6
chr17	19241130	19241257	MACS_peak_1393	53.56	0	0	0	0	0	0				MACS_peak_1393	3_TTS	100477	19140690	19240028	+	EPN2_dup1
chr17	20901421	20901692	MACS_peak_1394	80.93	0	0	0	0	0	0				MACS_peak_1394	3_TTS	44894	20946352	20902906	-	USP22
chr17	20901856	20902022	MACS_peak_1395	55.35	0	0	0	0	0	0				MACS_peak_1395	3_TTS	44448	20946352	20902906	-	USP22
chr17	26486081	26486205	MACS_peak_1396	55.31	0	0	0	0	0	0				MACS_peak_1396	5_Distal	-67451	26553589	26555085	+	PYY2
chr17	26926228	26926558	MACS_peak_1397	57.24	1	chr17	26924891	26927398	107.43	MACS_peak_12321				MACS_peak_1397	5_TSS	171	26926151	26944395	+	SPAG5-AS1
chr17	27020737	27020875	MACS_peak_1398	51.96	0	0	0	0	0	0				MACS_peak_1398	3_Proximal	17300	27038109	27030215	-	PROCA1_dup4
chr17	27051888	27052015	MACS_peak_1399	52.13	1	chr17	27051030	27056881	658.5	MACS_peak_12327				MACS_peak_1399	3_TTS	1233	27050699	27050772	+	SNORD4B
chr17	27052035	27052224	MACS_peak_1400	75.97	1	chr17	27051030	27056881	658.5	MACS_peak_12327				MACS_peak_1400	3_TTS	5145	27047000	27051374	+	RPL23A
chr17	27052263	27052494	MACS_peak_1401	88.08	1	chr17	27051030	27056881	658.5	MACS_peak_12327				MACS_peak_1401	5_TSS	915	27053230	27051366	-	TLCD1
chr17	27052624	27053109	MACS_peak_1402	460.7	1	chr17	27051030	27056881	658.5	MACS_peak_12327				MACS_peak_1402	5_TSS	399	27053230	27051366	-	TLCD1
chr17	27070967	27071158	MACS_peak_1403	53.49	1	chr17	27069616	27073339	559.35	MACS_peak_12328				MACS_peak_1403	5_TSS	34	27071023	27077976	+	TRAF4
chr17	27079409	27079592	MACS_peak_1404	80.51	0	0	0	0	0	0				MACS_peak_1404	3_TTS	8497	27071023	27077976	+	TRAF4
chr17	27079613	27079770	MACS_peak_1405	57.29	0	0	0	0	0	0				MACS_peak_1405	3_TTS	8667	27071023	27077976	+	TRAF4
chr17	27213663	27213793	MACS_peak_1406	53.82	0	0	0	0	0	0				MACS_peak_1406	Intragenic	11009	27224715	27206357	-	FLOT2_dup1
chr17	27224271	27224897	MACS_peak_1407	233	1	chr17	27223523	27225690	148.91	MACS_peak_12334				MACS_peak_1407	5_TSS	-15	27224754	27206353	-	FLOT2
chr17	27883032	27883160	MACS_peak_1408	54.31	1	chr17	27883566	27885335	75.51	MACS_peak_12342				MACS_peak_1408	3_TTS	10970	27894042	27887689	-	ABHD15
chr17	28072637	28072762	MACS_peak_1409	50.15	1	chr17	28070940	28072669	62.04	MACS_peak_12347				MACS_peak_1409	Intragenic	15739	28088450	28000930	-	SSH2_dup2
chr17	30726350	30726559	MACS_peak_1410	69.84	0	0	0	0	0	0				MACS_peak_1410	5_Distal	-45040	30771481	30810337	+	PSMD11_dup1
chr17	30813427	30813751	MACS_peak_1411	90.98	1	chr17	30812530	30814624	174.07	MACS_peak_12380				MACS_peak_1411	5_TSS	-562	30814105	30818271	+	CDK5R1
chr17	30813802	30813957	MACS_peak_1412	73.08	1	chr17	30812530	30814624	174.07	MACS_peak_12380				MACS_peak_1412	5_TSS	-256	30814105	30818271	+	CDK5R1
chr17	34891279	34891434	MACS_peak_1413	59.25	1	chr17	34889336	34892398	240.07	MACS_peak_12407				MACS_peak_1413	5_TSS	-94	34891305	34851599	-	MYO19_dup1
chr17	34947904	34948710	MACS_peak_1414	710.74	1	chr17	34947204	34949819	156.65	MACS_peak_12409				MACS_peak_1414	5_TSS	105	34948226	34957233	+	DHRS11
chr17	34957917	34958139	MACS_peak_1415	110.92	1	chr17	34957002	34959155	162.51	MACS_peak_12410				MACS_peak_1415	5_TSS	-11	34958025	34965407	+	MRM1
chr17	34958145	34958304	MACS_peak_1416	103.77	1	chr17	34957002	34959155	162.51	MACS_peak_12410				MACS_peak_1416	5_TSS	217	34958025	34965407	+	MRM1
chr17	35969116	35970194	MACS_peak_1417	672.63	1	chr17	35968401	35970484	97.01	MACS_peak_12426				MACS_peak_1417	5_TSS	45	35969486	35874900	-	SYNRG_dup1
chr17	36885967	36886495	MACS_peak_1418	288.29	1	chr17	36884955	36887629	228.07	MACS_peak_12446				MACS_peak_1418	5_TSS	-315	36886510	36891858	+	CISD3
chr17	36886646	36886802	MACS_peak_1419	56.4	1	chr17	36884955	36887629	228.07	MACS_peak_12446				MACS_peak_1419	5_TSS	181	36886510	36891858	+	CISD3
chr17	37362194	37362358	MACS_peak_1420	75.35	0	0	0	0	0	0				MACS_peak_1420	3_TTS	5665	37356576	37360983	+	RPL19_dup1
chr17	37729682	37729924	MACS_peak_1421	115.66	1	chr17	37729046	37730961	75.53	MACS_peak_12467				MACS_peak_1421	3_Distal	34391	37764175	37760021	-	NEUROD2
chr17	37730113	37730457	MACS_peak_1422	119.92	1	chr17	37729046	37730961	75.53	MACS_peak_12467				MACS_peak_1422	3_Distal	33948	37764175	37760021	-	NEUROD2
chr17	37886000	37886114	MACS_peak_1423	57.97	1	chr17	37884883	37887812	241.56	MACS_peak_12473				MACS_peak_1423	5_TSS	773	37886816	37884753	-	MIEN1_dup1
chr17	37886371	37886862	MACS_peak_1424	250.42	1	chr17	37884883	37887812	241.56	MACS_peak_12473				MACS_peak_1424	5_TSS	187	37886816	37884753	-	MIEN1_dup1
chr17	38270271	38270404	MACS_peak_1425	53.11	1	chr17	38268076	38270997	190.35	MACS_peak_12493				MACS_peak_1425	5_Proximal	-8455	38278790	38293045	+	MSL1
chr17	38443687	38444142	MACS_peak_1426	169.97	1	chr17	38442911	38445214	118.73	MACS_peak_12499				MACS_peak_1426	5_TSS	-131	38444146	38459413	+	CDC6
chr17	38627374	38627545	MACS_peak_1427	73.54	1	chr17	38626689	38632716	447.95	MACS_peak_12506				MACS_peak_1427	3_TTS	30390	38657854	38632080	-	TNS4
chr17	38627735	38627930	MACS_peak_1428	70.2	1	chr17	38626689	38632716	447.95	MACS_peak_12506				MACS_peak_1428	3_TTS	29990	38657854	38632080	-	TNS4
chr17	38628461	38628679	MACS_peak_1429	122.71	1	chr17	38626689	38632716	447.95	MACS_peak_12506				MACS_peak_1429	3_TTS	29289	38657854	38632080	-	TNS4
chr17	38629061	38629292	MACS_peak_1430	100.28	1	chr17	38626689	38632716	447.95	MACS_peak_12506				MACS_peak_1430	3_TTS	28651	38657854	38632080	-	TNS4
chr17	38629311	38630221	MACS_peak_1431	467.43	1	chr17	38626689	38632716	447.95	MACS_peak_12506				MACS_peak_1431	3_TTS	27729	38657854	38632080	-	TNS4
chr17	38630302	38630890	MACS_peak_1432	372.86	1	chr17	38626689	38632716	447.95	MACS_peak_12506				MACS_peak_1432	3_TTS	27354	38657854	38632080	-	TNS4
chr17	38630891	38631095	MACS_peak_1433	209.87	1	chr17	38626689	38632716	447.95	MACS_peak_12506				MACS_peak_1433	3_TTS	26915	38657854	38632080	-	TNS4
chr17	38631099	38631354	MACS_peak_1434	127.03	1	chr17	38626689	38632716	447.95	MACS_peak_12506				MACS_peak_1434	3_TTS	26632	38657854	38632080	-	TNS4
chr17	38631597	38632007	MACS_peak_1435	146.02	1	chr17	38626689	38632716	447.95	MACS_peak_12506				MACS_peak_1435	3_TTS	25929	38657854	38632080	-	TNS4
chr17	38640900	38641101	MACS_peak_1436	63.8	1	chr17	38641483	38643512	86.62	MACS_peak_12508				MACS_peak_1436	Intragenic	16847	38657854	38632080	-	TNS4
chr17	38647093	38647231	MACS_peak_1437	56.11	0	0	0	0	0	0				MACS_peak_1437	Intragenic	10671	38657854	38632080	-	TNS4
chr17	38652774	38652916	MACS_peak_1438	51.48	1	chr17	38653201	38655307	73.4	MACS_peak_12509				MACS_peak_1438	Intragenic	4986	38657854	38632080	-	TNS4
chr17	38656161	38656388	MACS_peak_1439	60.86	0	0	0	0	0	0				MACS_peak_1439	Intragenic	1565	38657854	38632080	-	TNS4
chr17	39678147	39678621	MACS_peak_1440	130.7	1	chr17	39676587	39680181	491.55	MACS_peak_12536				MACS_peak_1440	5_TSS	-3186	39675270	39669997	-	KRT15
chr17	39678623	39678991	MACS_peak_1441	102.88	1	chr17	39676587	39680181	491.55	MACS_peak_12536				MACS_peak_1441	5_TSS	-3469	39675270	39669997	-	KRT15
chr17	39681227	39681375	MACS_peak_1442	58.95	0	0	0	0	0	0				MACS_peak_1442	Intragenic	3317	39684641	39679869	-	KRT19
chr17	39849030	39849415	MACS_peak_1443	82.54	0	0	0	0	0	0				MACS_peak_1443	3_TTS	4018	39845127	39847898	+	EIF1
chr17	40274409	40274579	MACS_peak_1444	63.96	0	0	0	0	0	0				MACS_peak_1444	5_TSS	-243	40274756	40275371	+	HSPB9
chr17	40719011	40719210	MACS_peak_1445	61.72	1	chr17	40717990	40720345	175.77	MACS_peak_12572				MACS_peak_1445	5_TSS	5	40719078	40725221	+	MLX_dup1
chr17	40950535	40950695	MACS_peak_1446	55.23	0	0	0	0	0	0				MACS_peak_1446	5_TSS	97	40950743	40949636	-	COA3
chr17	40998546	40998686	MACS_peak_1447	51.51	0	0	0	0	0	0				MACS_peak_1447	3_TTS	13480	40985159	40995777	+	PSME3_dup1
chr17	41363666	41363947	MACS_peak_1448	83.5	1	chr17	41362425	41364894	85.79	MACS_peak_12588				MACS_peak_1448	5_TSS	-95	41363846	41372057	+	TMEM106A_dup1
chr17	41438569	41438667	MACS_peak_1449	61.52	1	chr17	41437107	41440007	661.66	MACS_peak_12590				MACS_peak_1449	3_Proximal	27649	41466266	41447213	-	LINC00910
chr17	42084861	42085009	MACS_peak_1450	77.88	0	0	0	0	0	0				MACS_peak_1450	Intragenic	2888	42082032	42086436	+	NAGS
chr17	42085101	42085301	MACS_peak_1451	94.6	0	0	0	0	0	0				MACS_peak_1451	Intragenic	3189	42082032	42086436	+	NAGS
chr17	42092107	42092405	MACS_peak_1452	67.72	1	chr17	42091306	42093400	108.45	MACS_peak_12604				MACS_peak_1452	5_TSS	126	42092397	42088556	-	TMEM101
chr17	42269402	42269543	MACS_peak_1453	51.29	0	0	0	0	0	0				MACS_peak_1453	3_TTS	4919	42264574	42269099	+	TMUB2_dup3
chr17	42269933	42270059	MACS_peak_1454	54.81	0	0	0	0	0	0				MACS_peak_1454	3_TTS	5397	42264574	42269099	+	TMUB2_dup3
chr17	42276864	42276970	MACS_peak_1455	51.82	1	chr17	42275150	42279211	651.69	MACS_peak_12610				MACS_peak_1455	5_TSS	-1372	42275529	42269173	-	ATXN7L3_dup1
chr17	42290567	42290732	MACS_peak_1456	65.12	0	0	0	0	0	0				MACS_peak_1456	5_Proximal	-5432	42285207	42285139	-	MIR6782
chr17	42297851	42298197	MACS_peak_1457	84.02	1	chr17	42296781	42299853	177.22	MACS_peak_12612				MACS_peak_1457	5_Distal	-12753	42285207	42285139	-	MIR6782
chr17	42299357	42299534	MACS_peak_1458	54.21	1	chr17	42296781	42299853	177.22	MACS_peak_12612				MACS_peak_1458	5_Distal	-14236	42285207	42285139	-	MIR6782
chr17	42470669	42470809	MACS_peak_1459	51.51	0	0	0	0	0	0				MACS_peak_1459	5_TSS	-3799	42466969	42449549	-	ITGA2B
chr17	43001363	43001488	MACS_peak_1460	52.04	0	0	0	0	0	0				MACS_peak_1460	5_Proximal	-8518	42992920	42982994	-	GFAP
chr17	43001548	43001790	MACS_peak_1461	76.57	0	0	0	0	0	0				MACS_peak_1461	5_Proximal	-8752	42992920	42982994	-	GFAP
chr17	43098621	43098835	MACS_peak_1462	59.46	0	0	0	0	0	0				MACS_peak_1462	3_TTS	30130	43128885	43100706	-	DCAKD
chr17	43128662	43128883	MACS_peak_1463	71.71	1	chr17	43127058	43129760	139.96	MACS_peak_12627				MACS_peak_1463	5_TSS	119	43128885	43100706	-	DCAKD
chr17	43185329	43185470	MACS_peak_1464	55.57	0	0	0	0	0	0				MACS_peak_1464	3_Proximal	6432	43191801	43191735	-	MIR6784
chr17	43185594	43185800	MACS_peak_1465	59.02	0	0	0	0	0	0				MACS_peak_1465	3_TTS	47059	43138667	43186382	+	NMT1
chr17	43186099	43186267	MACS_peak_1466	84.57	0	0	0	0	0	0				MACS_peak_1466	3_TTS	47537	43138667	43186382	+	NMT1
chr17	43188003	43188147	MACS_peak_1467	50.63	0	0	0	0	0	0				MACS_peak_1467	3_TTS	3728	43191801	43191735	-	MIR6784
chr17	45020426	45020559	MACS_peak_1468	52.04	0	0	0	0	0	0				MACS_peak_1468	3_TTS	20010	45000483	45019386	+	GOSR2_dup1
chr17	45020840	45020979	MACS_peak_1469	61.58	0	0	0	0	0	0				MACS_peak_1469	3_TTS	20434	45000483	45019386	+	GOSR2_dup1
chr17	45020994	45021109	MACS_peak_1470	68.36	0	0	0	0	0	0				MACS_peak_1470	3_TTS	20575	45000483	45019386	+	GOSR2_dup1
chr17	45021810	45021993	MACS_peak_1471	68.05	0	0	0	0	0	0				MACS_peak_1471	3_TTS	21412	45000483	45019386	+	GOSR2_dup1
chr17	45022516	45022661	MACS_peak_1472	70.2	0	0	0	0	0	0				MACS_peak_1472	3_TTS	22111	45000483	45019386	+	GOSR2_dup1
chr17	45144583	45144964	MACS_peak_1473	367.36	1	chr17	45143832	45145800	65.98	MACS_peak_12644				MACS_peak_1473	5_Distal	-18097	45126718	45125775	-	ARL17B_dup4
chr17	45704148	45704290	MACS_peak_1474	57	0	0	0	0	0	0				MACS_peak_1474	5_Distal	-23009	45727204	45761004	+	KPNB1
chr17	45764994	45765294	MACS_peak_1475	101.4	0	0	0	0	0	0				MACS_peak_1475	5_Proximal	-7531	45772630	45789429	+	TBKBP1
chr17	47011285	47011426	MACS_peak_1476	51.29	0	0	0	0	0	0				MACS_peak_1476	Intragenic	10877	47022204	47007459	-	SNF8_dup1
chr17	48423312	48423438	MACS_peak_1477	61.93	1	chr17	48422449	48424750	88.19	MACS_peak_12722				MACS_peak_1477	5_TSS	-36	48423393	48438546	+	XYLT2_dup1
chr17	48439589	48439744	MACS_peak_1478	51.66	0	0	0	0	0	0				MACS_peak_1478	3_TTS	16302	48423393	48438546	+	XYLT2_dup1
chr17	48458235	48458414	MACS_peak_1479	74.2	0	0	0	0	0	0				MACS_peak_1479	3_TTS	16550	48474914	48458594	-	LRRC59
chr17	49031386	49031517	MACS_peak_1480	62.08	0	0	0	0	0	0				MACS_peak_1480	5_Distal	-86128	48945339	48939587	-	TOB1_dup2
chr17	49033169	49033283	MACS_peak_1481	56.96	0	0	0	0	0	0				MACS_peak_1481	5_Distal	-87871	48945339	48939587	-	TOB1_dup2
chr17	49242432	49242575	MACS_peak_1482	50.85	1	chr17	49242343	49245059	200.66	MACS_peak_12753				MACS_peak_1482	5_TSS	-263	49242796	49249105	+	NME2
chr17	49243156	49243343	MACS_peak_1483	70.2	1	chr17	49242343	49245059	200.66	MACS_peak_12753				MACS_peak_1483	5_TSS	-403	49243633	49249105	+	NME2_dup1
chr17	54883701	54883836	MACS_peak_1484	50.43	0	0	0	0	0	0				MACS_peak_1484	Intragenic	27519	54911256	54869274	-	C17orf67
chr17	54967866	54968004	MACS_peak_1485	51.17	0	0	0	0	0	0				MACS_peak_1485	5_TSS	750	54968716	54968631	-	MIR3614
chr17	55152711	55152881	MACS_peak_1486	54.52	0	0	0	0	0	0				MACS_peak_1486	5_Proximal	-9797	55162553	55198710	+	AKAP1
chr17	55205245	55205387	MACS_peak_1487	71.03	0	0	0	0	0	0				MACS_peak_1487	3_Proximal	42168	55163135	55198705	+	AKAP1_dup2
chr17	56065547	56066446	MACS_peak_1488	592.73	1	chr17	56063299	56066836	244.39	MACS_peak_12814				MACS_peak_1488	5_TSS	-354	56065625	56048908	-	VEZF1
chr17	56407103	56407304	MACS_peak_1489	57.5	0	0	0	0	0	0				MACS_peak_1489	5_TSS	240	56406966	56431088	+	TSPOAP1-AS1_dup3
chr17	56429064	56430050	MACS_peak_1490	662.48	1	chr17	56428493	56431505	489.86	MACS_peak_12822				MACS_peak_1490	5_TSS	0	56429599	56422536	-	SUPT4H1_dup1
chr17	57184130	57184337	MACS_peak_1491	60.18	1	chr17	57182639	57185579	157.89	MACS_peak_12840				MACS_peak_1491	5_TSS	37	57184282	57060000	-	TRIM37_dup1
chr17	57184359	57184914	MACS_peak_1492	222.06	1	chr17	57182639	57185579	157.89	MACS_peak_12840				MACS_peak_1492	5_TSS	-506	57184282	57060000	-	TRIM37_dup1
chr17	57917393	57917553	MACS_peak_1493	55.98	1	chr17	57913751	57919393	1725.78	MACS_peak_12853				MACS_peak_1493	5_TSS	-1118	57918627	57918698	+	MIR21
chr17	57919568	57919736	MACS_peak_1494	64.22	1	chr17	57918937	57925175	3100	MACS_peak_12854				MACS_peak_1494	3_TTS	1032	57918627	57918698	+	MIR21
chr17	57920023	57920238	MACS_peak_1495	89.05	1	chr17	57918937	57925175	3100	MACS_peak_12854				MACS_peak_1495	3_TTS	1549	57918627	57918698	+	MIR21
chr17	57920461	57921113	MACS_peak_1496	1061.51	1	chr17	57918937	57925175	3100	MACS_peak_12854				MACS_peak_1496	3_TTS	2303	57918627	57918698	+	MIR21
chr17	57921343	57921820	MACS_peak_1497	546.01	1	chr17	57918937	57925175	3100	MACS_peak_12854				MACS_peak_1497	3_TTS	2766	57918627	57918698	+	MIR21
chr17	57922024	57922369	MACS_peak_1498	137.9	1	chr17	57918937	57925175	3100	MACS_peak_12854				MACS_peak_1498	3_TTS	3456	57918627	57918698	+	MIR21
chr17	57922373	57922724	MACS_peak_1499	111.02	1	chr17	57918937	57925175	3100	MACS_peak_12854				MACS_peak_1499	3_TTS	3965	57918627	57918698	+	MIR21
chr17	57922828	57923012	MACS_peak_1500	54.9	1	chr17	57918937	57925175	3100	MACS_peak_12854				MACS_peak_1500	3_TTS	4295	57918627	57918698	+	MIR21
chr17	58715990	58716085	MACS_peak_1501	61.52	0	0	0	0	0	0				MACS_peak_1501	Intragenic	38492	58677544	58743640	+	PPM1D
chr17	61292682	61292825	MACS_peak_1502	50.85	0	0	0	0	0	0				MACS_peak_1502	Intragenic	205827	61086898	61505067	+	TANC2
chr17	61678035	61678291	MACS_peak_1503	85.49	1	chr17	61677150	61679371	158.81	MACS_peak_12917				MACS_peak_1503	5_TSS	16	61678231	61685725	+	TACO1
chr17	61819839	61820007	MACS_peak_1504	65.48	1	chr17	61817608	61820650	171.23	MACS_peak_12919				MACS_peak_1504	5_TSS	-627	61819330	61780192	-	STRADA_dup1
chr17	62224165	62224357	MACS_peak_1505	72.89	1	chr17	62221997	62227267	679.44	MACS_peak_12926				MACS_peak_1505	5_TSS	559	62223699	62223831	+	SNORA50C
chr17	62224369	62224529	MACS_peak_1506	80	1	chr17	62221997	62227267	679.44	MACS_peak_12926				MACS_peak_1506	5_TSS	767	62223699	62223831	+	SNORA50C
chr17	62224971	62225096	MACS_peak_1507	50.15	1	chr17	62221997	62227267	679.44	MACS_peak_12926				MACS_peak_1507	3_TTS	1349	62223699	62223831	+	SNORA50C
chr17	62226046	62226383	MACS_peak_1508	100.1	1	chr17	62221997	62227267	679.44	MACS_peak_12926				MACS_peak_1508	3_TTS	2419	62223699	62223831	+	SNORA50C
chr17	62492945	62494100	MACS_peak_1509	758.33	1	chr17	62491888	62494454	260.26	MACS_peak_12929				MACS_peak_1509	5_TSS	-66	62493184	62473902	-	POLG2
chr17	63520284	63520436	MACS_peak_1510	55.06	1	chr17	63518676	63521325	300.64	MACS_peak_12955				MACS_peak_1510	3_TTS	37353	63557740	63524683	-	AXIN2
chr17	63522440	63522589	MACS_peak_1511	55.54	1	chr17	63522558	63525310	137.42	MACS_peak_12956				MACS_peak_1511	3_TTS	35217	63557740	63524683	-	AXIN2
chr17	63523216	63523990	MACS_peak_1512	183.27	1	chr17	63522558	63525310	137.42	MACS_peak_12956				MACS_peak_1512	3_TTS	33993	63557740	63524683	-	AXIN2
chr17	63524069	63524498	MACS_peak_1513	124.06	1	chr17	63522558	63525310	137.42	MACS_peak_12956				MACS_peak_1513	3_TTS	33458	63557740	63524683	-	AXIN2
chr17	63544024	63544230	MACS_peak_1514	50.67	1	chr17	63542117	63545302	259.82	MACS_peak_12959				MACS_peak_1514	Intragenic	13617	63557740	63524683	-	AXIN2
chr17	63598261	63598389	MACS_peak_1515	51.3	0	0	0	0	0	0				MACS_peak_1515	5_Distal	-40553	63557740	63524683	-	AXIN2
chr17	63991728	63991858	MACS_peak_1516	61.93	0	0	0	0	0	0				MACS_peak_1516	Intergenic	-169110	63822661	63631658	-	CEP112_dup1
chr17	65332817	65332943	MACS_peak_1517	54.81	0	0	0	0	0	0				MACS_peak_1517	3_TTS	29887	65362743	65334032	-	PSMD12_dup1
chr17	65544752	65544874	MACS_peak_1518	55.82	0	0	0	0	0	0				MACS_peak_1518	5_Distal	-77134	65467701	65467607	-	MIR548D2
chr17	65721409	65721522	MACS_peak_1519	58.25	0	0	0	0	0	0				MACS_peak_1519	5_Distal	-15315	65736786	65736917	+	SNORA38B
chr17	66244224	66244394	MACS_peak_1520	56.48	1	chr17	66242866	66245171	246.59	MACS_peak_12999				MACS_peak_1520	5_TSS	210	66244145	66253305	+	AMZ2_dup10
chr17	66518956	66519107	MACS_peak_1521	58.66	0	0	0	0	0	0				MACS_peak_1521	Intragenic	7468	66511535	66547457	+	PRKAR1A_dup5
chr17	67893859	67893990	MACS_peak_1522	53.58	1	chr17	67891866	67893926	306.4	MACS_peak_13020				MACS_peak_1522	5_Distal	-63893	67957848	67979685	+	LINC01497_dup1
chr17	70123244	70123446	MACS_peak_1523	65.08	1	chr17	70120631	70124543	531.5	MACS_peak_13056				MACS_peak_1523	3_TTS	6138	70117161	70122560	+	SOX9
chr17	71189522	71189846	MACS_peak_1524	123.66	1	chr17	71186984	71190487	253.27	MACS_peak_13087				MACS_peak_1524	5_TSS	618	71189173	71204645	+	COG1
chr17	72207156	72207618	MACS_peak_1525	186.82	0	0	0	0	0	0				MACS_peak_1525	Intragenic	2256	72209460	72206135	-	MGC16275
chr17	72208456	72208594	MACS_peak_1526	78.67	0	0	0	0	0	0				MACS_peak_1526	5_TSS	969	72209460	72206135	-	MGC16275
chr17	73105581	73106041	MACS_peak_1527	148.01	1	chr17	73104783	73107419	144.42	MACS_peak_13117				MACS_peak_1527	5_TSS	-302	73106047	73110924	+	ARMC7_dup1
chr17	73772291	73772424	MACS_peak_1528	51.5	0	0	0	0	0	0				MACS_peak_1528	3_TTS	3631	73776016	73772515	-	H3F3B
chr17	73772637	73772757	MACS_peak_1529	65.44	0	0	0	0	0	0				MACS_peak_1529	3_TTS	3336	73776016	73772515	-	H3F3B
chr17	73819147	73819284	MACS_peak_1530	52.18	0	0	0	0	0	0				MACS_peak_1530	3_TTS	21609	73840798	73823308	-	UNC13D
chr17	73821265	73821435	MACS_peak_1531	54.52	0	0	0	0	0	0				MACS_peak_1531	3_TTS	19452	73840798	73823308	-	UNC13D
chr17	73874538	73874738	MACS_peak_1532	61.72	1	chr17	73872767	73875704	113.65	MACS_peak_13150				MACS_peak_1532	5_TSS	38	73874656	73870245	-	TRIM47
chr17	73936915	73937178	MACS_peak_1533	90.72	1	chr17	73936116	73938572	188.07	MACS_peak_13153				MACS_peak_1533	5_TSS	-2733	73934313	73905655	-	FBF1
chr17	73937258	73937518	MACS_peak_1534	169.54	1	chr17	73936116	73938572	188.07	MACS_peak_13153				MACS_peak_1534	5_TSS	-3018	73934313	73905655	-	FBF1
chr17	74074811	74075030	MACS_peak_1535	72.13	0	0	0	0	0	0				MACS_peak_1535	5_TSS	-362	74075263	74078885	+	ZACN
chr17	74075769	74076209	MACS_peak_1536	194.34	0	0	0	0	0	0				MACS_peak_1536	5_TSS	683	74075263	74078885	+	ZACN
chr17	74076397	74076568	MACS_peak_1537	63.73	0	0	0	0	0	0				MACS_peak_1537	3_TTS	23399	74099868	74077074	-	EXOC7_dup1
chr17	74076610	74076973	MACS_peak_1538	161.25	0	0	0	0	0	0				MACS_peak_1538	3_TTS	23003	74099868	74077074	-	EXOC7_dup1
chr17	74268015	74268161	MACS_peak_1539	50.06	0	0	0	0	0	0				MACS_peak_1539	3_TTS	6774	74261286	74267379	+	UBALD2
chr17	74489504	74489713	MACS_peak_1540	64.97	0	0	0	0	0	0				MACS_peak_1540	5_Proximal	-5633	74483991	74466975	-	RHBDF2
chr17	74489776	74489922	MACS_peak_1541	59.84	0	0	0	0	0	0				MACS_peak_1541	5_Proximal	-5874	74483991	74466975	-	RHBDF2
chr17	74564975	74565109	MACS_peak_1542	51.88	0	0	0	0	0	0				MACS_peak_1542	3_Proximal	7354	74557715	74557788	+	SNORD1A
chr17	75498662	75498801	MACS_peak_1543	51.73	0	0	0	0	0	0				MACS_peak_1543	3_TTS	27433	75471325	75496678	+	SEPT9_dup10
chr17	76170387	76170555	MACS_peak_1544	62.87	0	0	0	0	0	0				MACS_peak_1544	3_TTS	5879	76164626	76169009	+	SYNGR2_dup1
chr17	76222100	76222246	MACS_peak_1545	50.21	0	0	0	0	0	0				MACS_peak_1545	5_Proximal	-5189	76227391	76237068	+	TMEM235_dup1
chr17	76589458	76589576	MACS_peak_1546	56.88	1	chr17	76587563	76589387	92.42	MACS_peak_13223				MACS_peak_1546	5_Distal	-16030	76573476	76419778	-	DNAH17
chr17	76963311	76963425	MACS_peak_1547	61.02	0	0	0	0	0	0				MACS_peak_1547	3_TTS	12686	76976061	76967335	-	LGALS3BP
chr17	76983115	76983238	MACS_peak_1548	55.57	1	chr17	76982060	76984131	91.97	MACS_peak_13233				MACS_peak_1548	5_Proximal	-7132	76976061	76967335	-	LGALS3BP
chr17	77765195	77765374	MACS_peak_1549	71.36	0	0	0	0	0	0				MACS_peak_1549	3_TTS	5676	77770915	77768176	-	CBX8
chr17	77906536	77906699	MACS_peak_1550	57.33	0	0	0	0	0	0				MACS_peak_1550	5_Proximal	-6093	77900524	77889051	-	LINC01979
chr17	78243713	78243899	MACS_peak_1551	54.49	0	0	0	0	0	0				MACS_peak_1551	3_Distal	49584	78194200	78227308	+	SLC26A11_dup1
chr17	78244565	78244749	MACS_peak_1552	79.57	0	0	0	0	0	0				MACS_peak_1552	3_Distal	50499	78194200	78227308	+	SLC26A11_dup1
chr17	78941407	78941552	MACS_peak_1553	60.09	0	0	0	0	0	0				MACS_peak_1553	5_Distal	-24140	78965641	78973933	+	CHMP6
chr17	78975438	78975590	MACS_peak_1554	58.43	0	0	0	0	0	0				MACS_peak_1554	3_TTS	9840	78965641	78973933	+	CHMP6
chr17	78977286	78977405	MACS_peak_1555	52.04	0	0	0	0	0	0				MACS_peak_1555	3_TTS	11703	78965641	78973933	+	CHMP6
chr17	78978009	78978145	MACS_peak_1556	72.74	0	0	0	0	0	0				MACS_peak_1556	3_TTS	12434	78965641	78973933	+	CHMP6
chr17	79092715	79092857	MACS_peak_1557	67.22	1	chr17	79092280	79094655	322.51	MACS_peak_13269				MACS_peak_1557	3_TTS	83811	79008947	79091232	+	BAIAP2_dup1
chr17	79093039	79093213	MACS_peak_1558	98.74	1	chr17	79092280	79094655	322.51	MACS_peak_13269				MACS_peak_1558	3_TTS	84139	79008947	79091232	+	BAIAP2_dup1
chr17	79217444	79217603	MACS_peak_1559	87.19	0	0	0	0	0	0				MACS_peak_1559	3_TTS	4379	79213111	79215098	+	NDUFAF8
chr17	79218051	79218293	MACS_peak_1560	105.48	0	0	0	0	0	0				MACS_peak_1560	3_TTS	5061	79213111	79215098	+	NDUFAF8
chr17	79499984	79500130	MACS_peak_1561	50.21	0	0	0	0	0	0				MACS_peak_1561	Intragenic	4629	79495417	79504156	+	FSCN2_dup1
chr17	79500875	79501025	MACS_peak_1562	58.89	0	0	0	0	0	0				MACS_peak_1562	Intragenic	5529	79495417	79504156	+	FSCN2_dup1
chr17	79669457	79669848	MACS_peak_1563	274.46	1	chr17	79668851	79671536	108.96	MACS_peak_13290				MACS_peak_1563	5_TSS	-718	79670400	79674556	+	MRPL12
chr17	79669859	79670229	MACS_peak_1564	135.24	1	chr17	79668851	79671536	108.96	MACS_peak_13290				MACS_peak_1564	5_TSS	-410	79670400	79674556	+	MRPL12
chr17	79678824	79679462	MACS_peak_1565	235.03	1	chr17	79677999	79680475	155.01	MACS_peak_13291				MACS_peak_1565	5_TSS	-287	79679266	79688046	+	SLC25A10_dup1
chr17	79679512	79679698	MACS_peak_1566	98.91	1	chr17	79677999	79680475	155.01	MACS_peak_13291				MACS_peak_1566	5_TSS	294	79679266	79688046	+	SLC25A10_dup1
chr17	79679756	79679897	MACS_peak_1567	51.73	1	chr17	79677999	79680475	155.01	MACS_peak_13291				MACS_peak_1567	5_TSS	529	79679266	79688046	+	SLC25A10_dup1
chr17	79689415	79689553	MACS_peak_1568	78.67	0	0	0	0	0	0				MACS_peak_1568	3_TTS	10237	79679266	79688046	+	SLC25A10_dup1
chr17	79690475	79690654	MACS_peak_1569	113.48	0	0	0	0	0	0				MACS_peak_1569	3_TTS	11342	79679266	79688046	+	SLC25A10_dup1
chr17	79824639	79825557	MACS_peak_1570	435.27	1	chr17	79823578	79828033	660.03	MACS_peak_13294				MACS_peak_1570	3_TTS	3388	79828850	79825595	-	ARHGDIA_dup1
chr17	79825566	79825831	MACS_peak_1571	88.03	1	chr17	79823578	79828033	660.03	MACS_peak_13294				MACS_peak_1571	3_TTS	3159	79828850	79825595	-	ARHGDIA_dup1
chr17	79858514	79858642	MACS_peak_1572	54.31	0	0	0	0	0	0				MACS_peak_1572	5_TSS	-1393	79859985	79860781	+	NPB
chr17	79859304	79859447	MACS_peak_1573	50.85	0	0	0	0	0	0				MACS_peak_1573	5_TSS	-650	79859985	79860781	+	NPB
chr17	79875599	79876156	MACS_peak_1574	341.31	1	chr17	79874834	79876915	115.56	MACS_peak_13298				MACS_peak_1574	5_TSS	175	79876058	79869815	-	SIRT7
chr17	79888854	79889024	MACS_peak_1575	54.52	1	chr17	79889350	79891088	56.28	MACS_peak_13301				MACS_peak_1575	3_TTS	3209	79885705	79888629	+	MAFG-AS1
chr17	79889489	79889824	MACS_peak_1576	112.5	1	chr17	79889350	79891088	56.28	MACS_peak_13301				MACS_peak_1576	3_TTS	3860	79885705	79888629	+	MAFG-AS1
chr17	79980447	79980613	MACS_peak_1577	58.81	1	chr17	79979719	79982163	280.94	MACS_peak_13310				MACS_peak_1577	5_TSS	278	79980785	79976579	-	CENPX_dup1
chr17	80064101	80064246	MACS_peak_1578	50.42	0	0	0	0	0	0				MACS_peak_1578	5_Proximal	-8064	80056106	80036214	-	FASN
chr17	80198675	80198815	MACS_peak_1579	58.15	1	chr17	80198193	80200074	61.48	MACS_peak_13318				MACS_peak_1579	3_TTS	4208	80194544	80194604	+	MIR6787
chr17	80967491	80967619	MACS_peak_1580	54.31	0	0	0	0	0	0				MACS_peak_1580	5_TSS	-2708	80964873	80900025	-	B3GNTL1_dup3
chr17	81057277	81057427	MACS_peak_1581	57.77	1	chr17	81057230	81058843	56.78	MACS_peak_13348				MACS_peak_1581	3_TTS	19813	81037567	81052871	+	METRNL
chr17_gl000203_random	37223	37371	MACS_peak_1582	59.36	0	0	0	0	0	0				MACS_peak_1582	3_TTS	-81000304	81037567	81052871	+	METRNL
chr18	267868	268236	MACS_peak_1583	104.07	1	chr18	266299	269537	428.32	MACS_peak_13352				MACS_peak_1583	5_TSS	-90	268059	214520	-	THOC1
chr18	689767	689941	MACS_peak_1584	53.58	0	0	0	0	0	0				MACS_peak_1584	Intragenic	22686	712517	670324	-	ENOSF1_dup1
chr18	704422	704585	MACS_peak_1585	50.98	0	0	0	0	0	0				MACS_peak_1585	3_Distal	107861	812327	721592	-	YES1
chr18	2455305	2455441	MACS_peak_1586	50.4	0	0	0	0	0	0				MACS_peak_1586	3_Distal	116136	2571502	2537524	-	METTL4_dup1
chr18	3364304	3364444	MACS_peak_1587	50.94	0	0	0	0	0	0				MACS_peak_1587	5_Distal	-47530	3411925	3458406	+	TGIF1
chr18	5296188	5296368	MACS_peak_1588	89.96	1	chr18	5295122	5297274	165.63	MACS_peak_13418				MACS_peak_1588	5_TSS	-41	5296194	5289018	-	ZBTB14_dup1
chr18	9135780	9135971	MACS_peak_1589	55.86	1	chr18	9135051	9137894	223.94	MACS_peak_13457				MACS_peak_1589	5_TSS	894	9136718	9121263	-	NDUFV2-AS1_dup1
chr18	9136221	9136554	MACS_peak_1590	83.61	1	chr18	9135051	9137894	223.94	MACS_peak_13457				MACS_peak_1590	5_TSS	278	9136718	9121263	-	NDUFV2-AS1_dup1
chr18	9960336	9960575	MACS_peak_1591	50.57	0	0	0	0	0	0				MACS_peak_1591	3_TTS	46489	9913955	9960018	+	VAPA_dup1
chr18	9961404	9961571	MACS_peak_1592	53.58	0	0	0	0	0	0				MACS_peak_1592	3_TTS	47566	9913955	9960018	+	VAPA_dup1
chr18	11909485	11909620	MACS_peak_1593	52.64	1	chr18	11907218	11910103	217.68	MACS_peak_13509				MACS_peak_1593	5_TSS	-775	11908796	11883471	-	MPPE1_dup1
chr18	18517178	18517540	MACS_peak_1594	59.9	1	chr18	18514887	18520988	63.43	MACS_peak_13531				MACS_peak_1594	3_Distal	174492	18691812	18529703	-	ROCK1
chr18	18519887	18520383	MACS_peak_1595	94.35	1	chr18	18514887	18520988	63.43	MACS_peak_13531				MACS_peak_1595	3_Proximal	171639	18691812	18529703	-	ROCK1
chr18	19273134	19273274	MACS_peak_1596	51.51	0	0	0	0	0	0				MACS_peak_1596	3_Proximal	9759	19263471	19263558	+	MIR320C1
chr18	21922042	21922182	MACS_peak_1597	51.97	0	0	0	0	0	0				MACS_peak_1597	3_Distal	20439	21901650	21901699	+	MIR320C2
chr18	22141333	22141506	MACS_peak_1598	60.77	1	chr18	22139811	22141784	52.14	MACS_peak_13618				MACS_peak_1598	5_Distal	-66732	22208146	22242162	+	LINC01915
chr18	43652160	43652329	MACS_peak_1599	64.19	0	0	0	0	0	0				MACS_peak_1599	5_TSS	-28	43652250	43563502	-	PSTPIP2
chr18	47013517	47013791	MACS_peak_1600	137.73	0	0	0	0	0	0				MACS_peak_1600	5_TSS	-158	47013743	47013792	+	MIR1539
chr18	47013792	47013951	MACS_peak_1601	66.57	0	0	0	0	0	0				MACS_peak_1601	5_TSS	89	47013743	47013792	+	MIR1539
chr19	294629	294812	MACS_peak_1602	70.62	0	0	0	0	0	0				MACS_peak_1602	5_TSS	-3239	291435	281040	-	PLPP2_dup1
chr19	584285	584641	MACS_peak_1603	117.97	0	0	0	0	0	0				MACS_peak_1603	5_Proximal	-5389	589893	617159	+	HCN2
chr19	676645	676813	MACS_peak_1604	54.93	1	chr19	675597	678498	251.99	MACS_peak_13847				MACS_peak_1604	5_TSS	321	676389	683392	+	FSTL3
chr19	676956	677122	MACS_peak_1605	64.88	1	chr19	675597	678498	251.99	MACS_peak_13847				MACS_peak_1605	5_TSS	615	676389	683392	+	FSTL3
chr19	680000	680422	MACS_peak_1606	192.49	1	chr19	678927	681970	388.06	MACS_peak_13848				MACS_peak_1606	Intragenic	3792	676389	683392	+	FSTL3
chr19	683429	683580	MACS_peak_1607	58.66	0	0	0	0	0	0				MACS_peak_1607	3_TTS	7085	676389	683392	+	FSTL3
chr19	765492	765688	MACS_peak_1608	74.86	0	0	0	0	0	0				MACS_peak_1608	3_TTS	14482	751113	764319	+	MISP_dup1
chr19	813169	813377	MACS_peak_1609	104.49	0	0	0	0	0	0				MACS_peak_1609	5_TSS	-338	813584	813653	+	MIR3187
chr19	814293	814570	MACS_peak_1610	67.3	0	0	0	0	0	0				MACS_peak_1610	5_TSS	810	813584	813653	+	MIR3187
chr19	814937	815081	MACS_peak_1611	50.63	0	0	0	0	0	0				MACS_peak_1611	3_TTS	1458	813584	813653	+	MIR3187
chr19	995964	996091	MACS_peak_1612	51.88	0	0	0	0	0	0				MACS_peak_1612	5_TSS	-4408	1000418	1009731	+	GRIN3B
chr19	996198	996464	MACS_peak_1613	142.95	0	0	0	0	0	0				MACS_peak_1613	5_TSS	-4118	1000418	1009731	+	GRIN3B
chr19	1039831	1040313	MACS_peak_1614	162.25	1	chr19	1038639	1042090	196.79	MACS_peak_13868				MACS_peak_1614	5_TSS	-228	1040102	1065570	+	ABCA7
chr19	1064510	1064675	MACS_peak_1615	55.56	1	chr19	1063932	1067372	287.28	MACS_peak_13869				MACS_peak_1615	5_TSS	-1293	1065922	1087830	+	ARHGAP45
chr19	1064811	1064957	MACS_peak_1616	50.21	1	chr19	1063932	1067372	287.28	MACS_peak_13869				MACS_peak_1616	5_TSS	-1015	1065922	1087830	+	ARHGAP45
chr19	1084404	1084571	MACS_peak_1617	64.65	0	0	0	0	0	0				MACS_peak_1617	3_TTS	10901	1095391	1086578	-	POLR2E_dup1
chr19	1104586	1104805	MACS_peak_1618	71.44	1	chr19	1103021	1105747	118.33	MACS_peak_13874				MACS_peak_1618	5_TSS	157	1104477	1106788	+	GPX4_dup2
chr19	1104827	1105152	MACS_peak_1619	121.63	1	chr19	1103021	1105747	118.33	MACS_peak_13874				MACS_peak_1619	5_TSS	508	1104477	1106788	+	GPX4_dup2
chr19	1259354	1259911	MACS_peak_1620	173.37	1	chr19	1258161	1263835	553.26	MACS_peak_13884				MACS_peak_1620	5_Proximal	-9638	1269265	1274808	+	CIRBP_dup1
chr19	1260443	1260594	MACS_peak_1621	53.4	1	chr19	1258161	1263835	553.26	MACS_peak_13884				MACS_peak_1621	5_Proximal	-8744	1269265	1274808	+	CIRBP_dup1
chr19	1274943	1275920	MACS_peak_1622	667.03	1	chr19	1274409	1277006	375.71	MACS_peak_13887				MACS_peak_1622	5_TSS	67	1275520	1279243	+	C19orf24
chr19	1395632	1395828	MACS_peak_1623	70	0	0	0	0	0	0				MACS_peak_1623	3_TTS	5839	1401569	1397025	-	GAMT
chr19	1396306	1396451	MACS_peak_1624	60.09	0	0	0	0	0	0				MACS_peak_1624	3_TTS	5160	1401569	1397025	-	GAMT
chr19	1438360	1438595	MACS_peak_1625	59.23	1	chr19	1437451	1439612	124.17	MACS_peak_13895				MACS_peak_1625	5_TSS	40	1438424	1440496	+	RPS15_dup1
chr19	1474591	1474717	MACS_peak_1626	54.81	0	0	0	0	0	0				MACS_peak_1626	3_TTS	24519	1450148	1473243	+	APC2
chr19	1503634	1503777	MACS_peak_1627	53.1	0	0	0	0	0	0				MACS_peak_1627	3_TTS	9461	1513188	1505017	-	ADAMTSL5
chr19	1593010	1593178	MACS_peak_1628	84.57	1	chr19	1592292	1594114	83.9	MACS_peak_13902				MACS_peak_1628	5_TSS	-359	1592760	1576670	-	MBD3_dup1
chr19	1813666	1813823	MACS_peak_1629	57.29	1	chr19	1811173	1813640	101.28	MACS_peak_13910				MACS_peak_1629	5_TSS	-1472	1812275	1782074	-	ATP8B3_dup1
chr19	1875933	1876354	MACS_peak_1630	308.98	1	chr19	1875374	1877123	98.6	MACS_peak_13914				MACS_peak_1630	3_TTS	9355	1885518	1876975	-	ABHD17A_dup1
chr19	1993121	1993243	MACS_peak_1631	54.82	0	0	0	0	0	0				MACS_peak_1631	Intragenic	22509	2015702	1985447	-	BTBD2
chr19	2250367	2250529	MACS_peak_1632	56.2	1	chr19	2248752	2250347	58.4	MACS_peak_13933				MACS_peak_1632	5_TSS	-183	2250638	2250717	+	MIR4321
chr19	2274358	2274493	MACS_peak_1633	73.04	1	chr19	2273048	2275291	137.92	MACS_peak_13936				MACS_peak_1633	3_TTS	4919	2269485	2273487	+	OAZ1_dup1
chr19	2275106	2275235	MACS_peak_1634	53.07	1	chr19	2273048	2275291	137.92	MACS_peak_13936				MACS_peak_1634	3_TTS	5701	2269485	2273487	+	OAZ1_dup1
chr19	2427565	2428037	MACS_peak_1635	466.81	1	chr19	2426077	2428829	382.94	MACS_peak_13941				MACS_peak_1635	5_TSS	64	2427914	2425622	-	TIMM13
chr19	2945213	2945518	MACS_peak_1636	160.14	1	chr19	2943924	2946425	292.48	MACS_peak_13963				MACS_peak_1636	5_TSS	-432	2944969	2933216	-	ZNF77
chr19	3210594	3210782	MACS_peak_1637	60.06	0	0	0	0	0	0				MACS_peak_1637	5_Distal	-14006	3224701	3297073	+	CELF5
chr19	3970807	3970939	MACS_peak_1638	52.04	1	chr19	3970020	3972455	219.07	MACS_peak_13996				MACS_peak_1638	5_TSS	221	3971121	3958451	-	DAPK3
chr19	3971254	3971524	MACS_peak_1639	100.1	1	chr19	3970020	3972455	219.07	MACS_peak_13996				MACS_peak_1639	5_TSS	-177	3971121	3958451	-	DAPK3
chr19	4039227	4039335	MACS_peak_1640	52.04	0	0	0	0	0	0				MACS_peak_1640	3_TTS	26246	4065527	4043302	-	ZBTB7A
chr19	4039401	4039616	MACS_peak_1641	110.94	0	0	0	0	0	0				MACS_peak_1641	3_TTS	25998	4065527	4043302	-	ZBTB7A
chr19	4040152	4040289	MACS_peak_1642	52.18	0	0	0	0	0	0				MACS_peak_1642	3_TTS	25335	4065527	4043302	-	ZBTB7A
chr19	4061370	4061576	MACS_peak_1643	65.78	1	chr19	4060425	4062421	51.7	MACS_peak_14000				MACS_peak_1643	Intragenic	4037	4065527	4043302	-	ZBTB7A
chr19	4445701	4445825	MACS_peak_1644	55.31	0	0	0	0	0	0				MACS_peak_1644	5_TSS	-223	4445975	4446045	+	MIR4746
chr19	5680171	5680357	MACS_peak_1645	56.86	0	0	0	0	0	0				MACS_peak_1645	5_TSS	-474	5680776	5688534	+	HSD11B1L_dup1
chr19	5691068	5691172	MACS_peak_1646	60.9	1	chr19	5690455	5692141	50.75	MACS_peak_14039				MACS_peak_1646	5_TSS	776	5690346	5691678	+	RPL36_dup1
chr19	5691245	5691363	MACS_peak_1647	56.88	1	chr19	5690455	5692141	50.75	MACS_peak_14039				MACS_peak_1647	5_TSS	966	5690346	5691678	+	RPL36_dup1
chr19	5691451	5691575	MACS_peak_1648	55.31	1	chr19	5690455	5692141	50.75	MACS_peak_14039				MACS_peak_1648	3_TTS	1178	5690346	5691678	+	RPL36_dup1
chr19	5692820	5693001	MACS_peak_1649	62.02	0	0	0	0	0	0				MACS_peak_1649	3_TTS	2597	5690346	5691678	+	RPL36_dup1
chr19	5697685	5697826	MACS_peak_1650	51.29	0	0	0	0	0	0				MACS_peak_1650	3_Proximal	7431	5690346	5691678	+	RPL36_dup1
chr19	5891651	5891867	MACS_peak_1651	50.57	0	0	0	0	0	0				MACS_peak_1651	3_TTS	12271	5904024	5891287	-	NDUFA11
chr19	5892199	5892369	MACS_peak_1652	62.72	0	0	0	0	0	0				MACS_peak_1652	3_TTS	11740	5904024	5891287	-	NDUFA11
chr19	5892372	5892579	MACS_peak_1653	74.74	0	0	0	0	0	0				MACS_peak_1653	Intragenic	11564	5904024	5891287	-	NDUFA11
chr19	5892776	5892928	MACS_peak_1654	60.93	0	0	0	0	0	0				MACS_peak_1654	Intragenic	11146	5904024	5891287	-	NDUFA11
chr19	6017270	6017421	MACS_peak_1655	58.66	0	0	0	0	0	0				MACS_peak_1655	Intragenic	38895	5978414	6020374	+	LOC100128568
chr19	6412624	6412753	MACS_peak_1656	54.07	0	0	0	0	0	0				MACS_peak_1656	3_TTS	3806	6416522	6416421	-	MIR3940
chr19	6752643	6752776	MACS_peak_1657	68.3	1	chr19	6751908	6754648	222.46	MACS_peak_14056				MACS_peak_1657	3_TTS	13035	6739693	6751537	+	TRIP10_dup1
chr19	7627739	7627885	MACS_peak_1658	50.21	0	0	0	0	0	0				MACS_peak_1658	3_TTS	27180	7600589	7626653	+	PNPLA6_dup4
chr19	7702014	7702305	MACS_peak_1659	86.59	1	chr19	7701008	7703166	107.07	MACS_peak_14080				MACS_peak_1659	5_TSS	199	7701987	7712760	+	STXBP2_dup1
chr19	7979346	7979472	MACS_peak_1660	65.08	0	0	0	0	0	0				MACS_peak_1660	5_TSS	-1609	7981032	7983980	+	TGFBR3L
chr19	7991124	7991263	MACS_peak_1661	50.74	1	chr19	7989942	7992071	81.32	MACS_peak_14091				MACS_peak_1661	5_TSS	-118	7991051	7989381	-	CTXN1
chr19	7991413	7991561	MACS_peak_1662	59.36	1	chr19	7989942	7992071	81.32	MACS_peak_14091				MACS_peak_1662	5_TSS	-409	7991051	7989381	-	CTXN1
chr19	8372824	8373366	MACS_peak_1663	247.85	1	chr19	8371900	8374584	158.8	MACS_peak_14095				MACS_peak_1663	5_TSS	49	8373240	8367011	-	CD320_dup1
chr19	8388839	8388974	MACS_peak_1664	59.21	0	0	0	0	0	0				MACS_peak_1664	3_TTS	2544	8386384	8387280	+	RPS28
chr19	8389115	8389341	MACS_peak_1665	53.58	0	0	0	0	0	0				MACS_peak_1665	3_TTS	2863	8386384	8387280	+	RPS28
chr19	8389394	8389600	MACS_peak_1666	84.69	0	0	0	0	0	0				MACS_peak_1666	3_TTS	3138	8386384	8387280	+	RPS28
chr19	8570866	8570986	MACS_peak_1667	61.22	0	0	0	0	0	0				MACS_peak_1667	5_TSS	-3375	8567538	8554940	-	PRAM1
chr19	9879288	9879461	MACS_peak_1668	68.9	1	chr19	9878258	9880785	261.45	MACS_peak_14113				MACS_peak_1668	5_TSS	52	9879410	9868151	-	ZNF846
chr19	10223690	10223866	MACS_peak_1669	62.61	1	chr19	10223064	10225759	188.58	MACS_peak_14122				MACS_peak_1669	3_TTS	6860	10216899	10222679	+	PPAN_dup1
chr19	10223903	10224141	MACS_peak_1670	106.53	1	chr19	10223064	10225759	188.58	MACS_peak_14122				MACS_peak_1670	3_TTS	7113	10216899	10222679	+	PPAN_dup1
chr19	10224160	10224417	MACS_peak_1671	111.63	1	chr19	10223064	10225759	188.58	MACS_peak_14122				MACS_peak_1671	3_TTS	6233	10230600	10225690	-	EIF3G
chr19	10224591	10224768	MACS_peak_1672	92.47	1	chr19	10223064	10225759	188.58	MACS_peak_14122				MACS_peak_1672	3_TTS	5961	10230600	10225690	-	EIF3G
chr19	10224784	10224971	MACS_peak_1673	65.48	1	chr19	10223064	10225759	188.58	MACS_peak_14122				MACS_peak_1673	3_TTS	5736	10230600	10225690	-	EIF3G
chr19	10225012	10225201	MACS_peak_1674	126.4	1	chr19	10223064	10225759	188.58	MACS_peak_14122				MACS_peak_1674	3_TTS	5475	10230600	10225690	-	EIF3G
chr19	10225236	10225379	MACS_peak_1675	70.75	1	chr19	10223064	10225759	188.58	MACS_peak_14122				MACS_peak_1675	3_TTS	5316	10230600	10225690	-	EIF3G
chr19	10225424	10225690	MACS_peak_1676	99.57	1	chr19	10223064	10225759	188.58	MACS_peak_14122				MACS_peak_1676	3_TTS	5085	10230600	10225690	-	EIF3G
chr19	10225748	10225887	MACS_peak_1677	61.58	1	chr19	10223064	10225759	188.58	MACS_peak_14122				MACS_peak_1677	3_TTS	4816	10230600	10225690	-	EIF3G
chr19	10397385	10397683	MACS_peak_1678	77.48	1	chr19	10396821	10398853	189.38	MACS_peak_14128				MACS_peak_1678	5_TSS	-16	10397643	10399260	+	ICAM4_dup1
chr19	10679281	10679469	MACS_peak_1679	62.82	1	chr19	10678752	10680999	165.9	MACS_peak_14138				MACS_peak_1679	5_TSS	305	10679631	10677138	-	CDKN2D
chr19	10680268	10680415	MACS_peak_1680	59.6	1	chr19	10678752	10680999	165.9	MACS_peak_14138				MACS_peak_1680	5_TSS	-654	10679655	10677138	-	CDKN2D_dup1
chr19	10805386	10805531	MACS_peak_1681	60.09	0	0	0	0	0	0				MACS_peak_1681	5_Proximal	-6624	10812112	10824043	+	QTRT1
chr19	10806022	10806183	MACS_peak_1682	66.08	0	0	0	0	0	0				MACS_peak_1682	5_Proximal	-6001	10812112	10824043	+	QTRT1
chr19	10806459	10806587	MACS_peak_1683	53.31	0	0	0	0	0	0				MACS_peak_1683	5_Proximal	-5622	10812112	10824043	+	QTRT1
chr19	10945932	10946592	MACS_peak_1684	213.99	1	chr19	10945317	10948184	195.24	MACS_peak_14150				MACS_peak_1684	5_TSS	117	10946416	10942743	-	TMED1
chr19	11040197	11040322	MACS_peak_1685	55.06	1	chr19	11038521	11040389	64.98	MACS_peak_14153				MACS_peak_1685	5_TSS	-588	11039688	11033444	-	YIPF2_dup1
chr19	11071549	11071714	MACS_peak_1686	53.58	1	chr19	11070313	11073333	205.43	MACS_peak_14156				MACS_peak_1686	5_TSS	70	11071598	11172958	+	SMARCA4_dup1
chr19	11616364	11616773	MACS_peak_1687	101.72	1	chr19	11615213	11617734	243.46	MACS_peak_14178				MACS_peak_1687	5_TSS	111	11616738	11594242	-	ZNF653
chr19	12358523	12358661	MACS_peak_1688	61.84	0	0	0	0	0	0				MACS_peak_1688	3_Distal	47088	12405714	12382625	-	ZNF44_dup1
chr19	12780114	12780387	MACS_peak_1689	83.04	1	chr19	12779287	12781461	229.67	MACS_peak_14201				MACS_peak_1689	5_TSS	271	12780465	12778881	-	WDR83OS
chr19	12780458	12781028	MACS_peak_1690	275.19	1	chr19	12779287	12781461	229.67	MACS_peak_14201				MACS_peak_1690	5_TSS	-77	12780465	12778881	-	WDR83OS
chr19	12781100	12781340	MACS_peak_1691	86.37	1	chr19	12779287	12781461	229.67	MACS_peak_14201				MACS_peak_1691	5_TSS	-742	12780465	12778881	-	WDR83OS
chr19	12792454	12792615	MACS_peak_1692	71.98	1	chr19	12791343	12793645	183.19	MACS_peak_14202				MACS_peak_1692	5_TSS	133	12792701	12786531	-	DHPS_dup1
chr19	12807144	12807637	MACS_peak_1693	300.22	1	chr19	12806381	12808533	301.45	MACS_peak_14203				MACS_peak_1693	5_TSS	-39	12807455	12799730	-	FBXW9
chr19	12871600	12871732	MACS_peak_1694	53.35	0	0	0	0	0	0				MACS_peak_1694	3_TTS	8232	12863407	12869271	+	BEST2
chr19	12904349	12904799	MACS_peak_1695	191.7	1	chr19	12903059	12905991	825.3	MACS_peak_14213				MACS_peak_1695	3_TTS	2262	12902310	12904125	+	JUNB
chr19	12991553	12991690	MACS_peak_1696	52.18	0	0	0	0	0	0				MACS_peak_1696	5_TSS	740	12992335	12986025	-	DNASE2
chr19	13029888	13030340	MACS_peak_1697	190.21	1	chr19	13029325	13031274	145.3	MACS_peak_14218				MACS_peak_1697	5_TSS	-158	13030086	13009894	-	SYCE2
chr19	13056581	13056857	MACS_peak_1698	171.14	1	chr19	13055385	13057899	475.15	MACS_peak_14221				MACS_peak_1698	5_TSS	22	13056628	13064457	+	RAD23A_dup1
chr19	13067687	13067915	MACS_peak_1699	77.85	1	chr19	13066917	13068923	92.46	MACS_peak_14222				MACS_peak_1699	5_TSS	277	13068068	13064970	-	GADD45GIP1
chr19	13265852	13266055	MACS_peak_1700	61.72	1	chr19	13264068	13267763	895.08	MACS_peak_14235				MACS_peak_1700	3_TTS	4654	13261282	13265718	+	IER2
chr19	13858733	13858949	MACS_peak_1701	93.03	1	chr19	13857616	13860212	333.33	MACS_peak_14242				MACS_peak_1701	5_TSS	166	13858677	13874112	+	CCDC130_dup5
chr19	13885153	13885461	MACS_peak_1702	102.74	1	chr19	13884252	13886336	127.84	MACS_peak_14244				MACS_peak_1702	5_TSS	82	13885257	13889586	+	C19orf53
chr19	13944523	13944746	MACS_peak_1703	87.88	1	chr19	13943380	13945735	200.56	MACS_peak_14246				MACS_peak_1703	3_TTS	2470	13947103	13945330	-	LOC284454
chr19	14200464	14200647	MACS_peak_1704	61.1	1	chr19	14200477	14203122	290.68	MACS_peak_14262				MACS_peak_1704	5_TSS	843	14201387	14198658	-	SAMD1
chr19	14582890	14583181	MACS_peak_1705	110.53	0	0	0	0	0	0				MACS_peak_1705	3_TTS	3195	14586174	14583278	-	PTGER1
chr19	14583284	14583421	MACS_peak_1706	52.18	0	0	0	0	0	0				MACS_peak_1706	3_TTS	2797	14586174	14583278	-	PTGER1
chr19	14583793	14583934	MACS_peak_1707	51.29	0	0	0	0	0	0				MACS_peak_1707	3_TTS	2286	14586174	14583278	-	PTGER1
chr19	15490042	15490194	MACS_peak_1708	70.85	1	chr19	15488427	15492213	373.55	MACS_peak_14280				MACS_peak_1708	5_TSS	479	15490612	15464332	-	AKAP8
chr19	15490238	15491029	MACS_peak_1709	395.64	1	chr19	15488427	15492213	373.55	MACS_peak_14280				MACS_peak_1709	5_TSS	137	15490612	15464332	-	AKAP8
chr19	15947229	15947784	MACS_peak_1710	190.03	1	chr19	15946123	15948812	824.02	MACS_peak_14285				MACS_peak_1710	3_TTS	7865	15939757	15947131	+	UCA1
chr19	15947791	15947987	MACS_peak_1711	85.74	1	chr19	15946123	15948812	824.02	MACS_peak_14285				MACS_peak_1711	3_TTS	8158	15939757	15947131	+	UCA1
chr19	15948059	15948199	MACS_peak_1712	51.51	1	chr19	15946123	15948812	824.02	MACS_peak_14285				MACS_peak_1712	3_TTS	8398	15939757	15947131	+	UCA1
chr19	16739197	16739467	MACS_peak_1713	73.05	1	chr19	16737742	16740870	186.17	MACS_peak_14305				MACS_peak_1713	5_TSS	-414	16739015	16685718	-	MED26
chr19	16739543	16739788	MACS_peak_1714	97.11	1	chr19	16737742	16740870	186.17	MACS_peak_14305				MACS_peak_1714	5_TSS	-617	16739015	16685718	-	MED26
chr19	17416406	17417183	MACS_peak_1715	351.88	1	chr19	17415442	17418124	120.38	MACS_peak_14317				MACS_peak_1715	5_TSS	474	17416477	17417652	+	MRPL34
chr19	17530823	17531019	MACS_peak_1716	89.24	1	chr19	17529999	17532067	117.12	MACS_peak_14321				MACS_peak_1716	5_TSS	316	17530656	17536148	+	MVB12A_dup1
chr19	17615996	17616146	MACS_peak_1717	58.89	0	0	0	0	0	0				MACS_peak_1717	5_Proximal	-6389	17622432	17632097	+	PGLS
chr19	17928734	17928879	MACS_peak_1718	50.42	0	0	0	0	0	0				MACS_peak_1718	Intragenic	3553	17932383	17927322	-	INSL3_dup1
chr19	17969371	17969509	MACS_peak_1719	51.96	1	chr19	17969512	17972101	105.72	MACS_peak_14328				MACS_peak_1719	5_TSS	-3938	17973397	17973529	+	SNORA68
chr19	17976350	17976925	MACS_peak_1720	330.18	1	chr19	17975699	17977553	80.89	MACS_peak_14329				MACS_peak_1720	3_TTS	3154	17973397	17973529	+	SNORA68
chr19	18228642	18228989	MACS_peak_1721	98.19	0	0	0	0	0	0				MACS_peak_1721	5_Distal	-19141	18209626	18169805	-	IL12RB1
chr19	18262596	18262750	MACS_peak_1722	67.82	1	chr19	18262640	18264997	51.46	MACS_peak_14336				MACS_peak_1722	5_TSS	-1286	18263988	18281343	+	PIK3R2_dup1
chr19	18500976	18501787	MACS_peak_1723	440.75	1	chr19	18498556	18502503	397.2	MACS_peak_14349				MACS_peak_1723	3_TTS	4101	18497372	18497444	+	MIR3189
chr19	18501894	18502072	MACS_peak_1724	94.6	1	chr19	18498556	18502503	397.2	MACS_peak_14349				MACS_peak_1724	3_TTS	4603	18497372	18497444	+	MIR3189
chr19	18705115	18705372	MACS_peak_1725	82.17	0	0	0	0	0	0				MACS_peak_1725	3_TTS	5809	18699495	18703147	+	C19orf60_dup1
chr19	18985246	18985384	MACS_peak_1726	51.96	0	0	0	0	0	0				MACS_peak_1726	3_TTS	22203	19007536	18988718	-	CERS1_dup1
chr19	19100908	19101044	MACS_peak_1727	52.41	0	0	0	0	0	0				MACS_peak_1727	3_TTS	43382	19144380	19101696	-	SUGP2_dup2
chr19	19174199	19174508	MACS_peak_1728	113.34	1	chr19	19172936	19175993	528.09	MACS_peak_14362				MACS_peak_1728	5_TSS	-443	19174770	19223841	+	SLC25A42
chr19	19174729	19175100	MACS_peak_1729	87.5	1	chr19	19172936	19175993	528.09	MACS_peak_14362				MACS_peak_1729	5_TSS	196	19174803	19223841	+	SLC25A42_dup1
chr19	19313691	19314005	MACS_peak_1730	97.81	1	chr19	19313067	19315111	99.84	MACS_peak_14364				MACS_peak_1730	5_TSS	321	19314238	19312220	-	NR2C2AP_dup1
chr19	19314090	19314244	MACS_peak_1731	57.97	1	chr19	19313067	19315111	99.84	MACS_peak_14364				MACS_peak_1731	5_TSS	91	19314238	19312220	-	NR2C2AP_dup1
chr19	19626745	19627014	MACS_peak_1732	56.83	1	chr19	19626000	19628132	110.98	MACS_peak_14370				MACS_peak_1732	5_TSS	-386	19626469	19625028	-	TSSK6
chr19	19643208	19643383	MACS_peak_1733	72.54	0	0	0	0	0	0				MACS_peak_1733	3_TTS	16260	19627019	19639013	+	NDUFA13
chr19	19739307	19739450	MACS_peak_1734	59.45	1	chr19	19737907	19740386	290.84	MACS_peak_14375				MACS_peak_1734	5_TSS	-314	19739039	19734466	-	LPAR2
chr19	23819655	23819774	MACS_peak_1735	56.61	0	0	0	0	0	0				MACS_peak_1735	3_Distal	50331	23870017	23835708	-	ZNF675
chr19	27731965	27732387	MACS_peak_1736	62.54	0	0	0	0	0	0				MACS_peak_1736	Intergenic	-552232	28284375	28297688	+	LOC101927151_dup1
chr19	27739135	27739471	MACS_peak_1737	50.51	0	0	0	0	0	0				MACS_peak_1737	Intergenic	-545041	28284375	28297688	+	LOC101927151_dup1
chr19	29426913	29427045	MACS_peak_1738	50.34	0	0	0	0	0	0				MACS_peak_1738	5_Distal	-29041	29456038	29460055	+	LINC00906
chr19	30545987	30546373	MACS_peak_1739	64.21	0	0	0	0	0	0				MACS_peak_1739	3_Distal	112932	30433146	30507519	+	URI1_dup1
chr19	31060815	31060935	MACS_peak_1740	51.79	0	0	0	0	0	0				MACS_peak_1740	3_Distal	197569	30863300	31048966	+	ZNF536
chr19	33327485	33327762	MACS_peak_1741	56.66	0	0	0	0	0	0				MACS_peak_1741	Intragenic	33166	33360683	33321419	-	SLC7A9_dup1
chr19	33462246	33462447	MACS_peak_1742	65.03	1	chr19	33461761	33464205	258.18	MACS_peak_14415				MACS_peak_1742	5_TSS	-797	33463123	33468401	+	FAAP24_dup1
chr19	33884391	33884630	MACS_peak_1743	56.67	0	0	0	0	0	0				MACS_peak_1743	3_Distal	19070	33865430	33873592	+	CEBPG_dup1
chr19	34288500	34288708	MACS_peak_1744	51.04	1	chr19	34285096	34290986	1097.24	MACS_peak_14434				MACS_peak_1744	5_TSS	825	34287751	34306666	+	KCTD15_dup1
chr19	34288894	34289169	MACS_peak_1745	56.19	1	chr19	34285096	34290986	1097.24	MACS_peak_14434				MACS_peak_1745	Intragenic	1300	34287751	34306666	+	KCTD15_dup1
chr19	34895130	34895438	MACS_peak_1746	55.54	1	chr19	34893888	34896642	139.35	MACS_peak_14450				MACS_peak_1746	5_TSS	41	34895303	34917072	+	PDCD2L
chr19	34967380	34967585	MACS_peak_1747	54.47	0	0	0	0	0	0				MACS_peak_1747	5_Proximal	-5410	34972880	34992085	+	WTIP
chr19	34968700	34968841	MACS_peak_1748	51.91	0	0	0	0	0	0				MACS_peak_1748	5_TSS	-4148	34972880	34992085	+	WTIP
chr19	35520473	35521523	MACS_peak_1749	500.75	0	0	0	0	0	0				MACS_peak_1749	5_TSS	-270	35521592	35528624	+	SCN1B_dup1
chr19	35554846	35555067	MACS_peak_1750	68.97	0	0	0	0	0	0				MACS_peak_1750	Intragenic	23542	35531410	35557477	+	HPN_dup1
chr19	35615043	35616014	MACS_peak_1751	335.64	0	0	0	0	0	0				MACS_peak_1751	3_TTS	1810	35613604	35613668	+	MIR6887
chr19	35668145	35668286	MACS_peak_1752	50.84	1	chr19	35667634	35669630	57.93	MACS_peak_14467				MACS_peak_1752	3_Proximal	22360	35645845	35660788	+	FXYD5_dup5
chr19	35739823	35740178	MACS_peak_1753	74.49	1	chr19	35736903	35741728	1117.35	MACS_peak_14470				MACS_peak_1753	5_TSS	576	35739559	35758867	+	LSR_dup1
chr19	35752848	35753071	MACS_peak_1754	69.41	0	0	0	0	0	0				MACS_peak_1754	5_Proximal	-6928	35759881	35770724	+	USF2_dup1
chr19	35755163	35755380	MACS_peak_1755	64.94	0	0	0	0	0	0				MACS_peak_1755	5_TSS	-4594	35759881	35770724	+	USF2_dup1
chr19	35755406	35755643	MACS_peak_1756	61.51	0	0	0	0	0	0				MACS_peak_1756	5_TSS	-4357	35759881	35770724	+	USF2_dup1
chr19	35758227	35759631	MACS_peak_1757	530.39	1	chr19	35756860	35761792	240.39	MACS_peak_14471				MACS_peak_1757	5_TSS	-1071	35759881	35770724	+	USF2_dup1
chr19	35771034	35771429	MACS_peak_1758	124.43	1	chr19	35770666	35772507	59.7	MACS_peak_14472				MACS_peak_1758	5_TSS	-1942	35773249	35776045	+	HAMP
chr19	35771608	35771935	MACS_peak_1759	78.9	1	chr19	35770666	35772507	59.7	MACS_peak_14472				MACS_peak_1759	5_TSS	-1435	35773249	35776045	+	HAMP
chr19	35949550	35949714	MACS_peak_1760	53.12	0	0	0	0	0	0				MACS_peak_1760	3_Proximal	8972	35940617	35942669	+	FFAR2
chr19	35987157	35987312	MACS_peak_1761	57.39	0	0	0	0	0	0				MACS_peak_1761	3_TTS	5539	35992813	35988119	-	DMKN_dup7
chr19	36157116	36157399	MACS_peak_1762	89.54	0	0	0	0	0	0				MACS_peak_1762	5_TSS	-161	36157418	36169387	+	UPK1A_dup1
chr19	36195038	36195178	MACS_peak_1763	51.97	0	0	0	0	0	0				MACS_peak_1763	5_TSS	-272	36195389	36207940	+	ZBTB32_dup1
chr19	36230096	36230358	MACS_peak_1764	71.44	1	chr19	36229395	36233154	132.43	MACS_peak_14485				MACS_peak_1764	3_TTS	21389	36208921	36229781	+	KMT2B
chr19	36376299	36376456	MACS_peak_1765	73.07	0	0	0	0	0	0				MACS_peak_1765	3_TTS	14263	36390639	36378854	-	NFKBID
chr19	36499955	36500653	MACS_peak_1766	262.31	0	0	0	0	0	0				MACS_peak_1766	5_TSS	-611	36499695	36494201	-	SYNE4_dup1
chr19	36630714	36630975	MACS_peak_1767	57.47	1	chr19	36629426	36633195	644.57	MACS_peak_14501				MACS_peak_1767	5_TSS	1	36630828	36641255	+	CAPNS1_dup1
chr19	36661648	36661904	MACS_peak_1768	81.99	1	chr19	36659411	36661545	229.38	MACS_peak_14502				MACS_peak_1768	5_Distal	-17921	36643771	36641824	-	COX7A1
chr19	36665729	36665903	MACS_peak_1769	51.93	0	0	0	0	0	0				MACS_peak_1769	5_Distal	-22025	36643771	36641824	-	COX7A1
chr19	36733625	36733785	MACS_peak_1770	62.56	0	0	0	0	0	0				MACS_peak_1770	5_Distal	-27756	36705986	36672962	-	ZNF565_dup1
chr19	37328546	37328696	MACS_peak_1771	51.61	1	chr19	37328343	37330436	50.64	MACS_peak_14514				MACS_peak_1771	5_TSS	278	37328929	37309224	-	ZNF790
chr19	37825486	37826067	MACS_peak_1772	136.15	1	chr19	37824100	37826918	100.06	MACS_peak_14521				MACS_peak_1772	5_TSS	205	37825526	37855357	+	HKR1_dup18
chr19	37861417	37861878	MACS_peak_1773	98.58	1	chr19	37859997	37863500	75.98	MACS_peak_14522				MACS_peak_1773	5_TSS	-433	37862059	37883966	+	ZNF527
chr19	38049540	38049694	MACS_peak_1774	53.34	0	0	0	0	0	0				MACS_peak_1774	3_Proximal	36049	38085693	38055155	-	ZNF571_dup1
chr19	38276504	38276639	MACS_peak_1775	52.04	0	0	0	0	0	0				MACS_peak_1775	5_Proximal	-6359	38270230	38229203	-	ZNF573_dup1
chr19	38799057	38799616	MACS_peak_1776	158.12	0	0	0	0	0	0				MACS_peak_1776	3_TTS	4658	38794801	38795646	+	C19orf33_dup1
chr19	38809152	38809333	MACS_peak_1777	56.84	0	0	0	0	0	0				MACS_peak_1777	5_TSS	-1224	38810484	38819649	+	KCNK6
chr19	38901549	38901755	MACS_peak_1778	58.29	0	0	0	0	0	0				MACS_peak_1778	3_TTS	7906	38893775	38899728	+	FAM98C
chr19	39222413	39222559	MACS_peak_1779	57.31	0	0	0	0	0	0				MACS_peak_1779	3_TTS	84216	39138256	39221172	+	ACTN4_dup1
chr19	39224039	39224229	MACS_peak_1780	50.84	0	0	0	0	0	0				MACS_peak_1780	3_TTS	85893	39138256	39221172	+	ACTN4_dup1
chr19	39224327	39224816	MACS_peak_1781	113.85	1	chr19	39225113	39227742	127.06	MACS_peak_14565				MACS_peak_1781	3_TTS	86450	39138256	39221172	+	ACTN4_dup1
chr19	39225603	39226005	MACS_peak_1782	79.69	1	chr19	39225113	39227742	127.06	MACS_peak_14565				MACS_peak_1782	3_TTS	87639	39138256	39221172	+	ACTN4_dup1
chr19	39326159	39326404	MACS_peak_1783	73.05	0	0	0	0	0	0				MACS_peak_1783	5_TSS	-3794	39322497	39306062	-	ECH1
chr19	39674278	39674450	MACS_peak_1784	70.9	1	chr19	39673257	39675216	64.15	MACS_peak_14580				MACS_peak_1784	5_Distal	-13251	39687604	39692522	+	NCCRP1
chr19	39880920	39881103	MACS_peak_1785	55.09	1	chr19	39880340	39883314	886.96	MACS_peak_14585				MACS_peak_1785	5_TSS	783	39881835	39876270	-	PAF1_dup1
chr19	39899905	39900630	MACS_peak_1786	359.71	1	chr19	39896102	39905760	1817.88	MACS_peak_14588				MACS_peak_1786	5_TSS	33	39900318	39900263	-	MIR4530
chr19	40438102	40438253	MACS_peak_1787	58.66	0	0	0	0	0	0				MACS_peak_1787	5_Distal	-38749	40476912	40487671	+	PSMC4_dup1
chr19	40468666	40468861	MACS_peak_1788	51.78	0	0	0	0	0	0				MACS_peak_1788	5_Proximal	-8113	40476912	40487671	+	PSMC4_dup1
chr19	41111011	41111961	MACS_peak_1789	162.47	1	chr19	41106156	41114951	1072.77	MACS_peak_14613				MACS_peak_1789	3_Distal	28641	41082757	41097305	+	SHKBP1
chr19	41119168	41119509	MACS_peak_1790	69.43	1	chr19	41118127	41121968	638.33	MACS_peak_14615				MACS_peak_1790	Intragenic	12024	41107277	41135725	+	LTBP4_dup2
chr19	41196211	41196942	MACS_peak_1791	265.05	1	chr19	41195187	41198408	291.5	MACS_peak_14621				MACS_peak_1791	5_TSS	64	41196563	41171812	-	NUMBL_dup1
chr19	41247741	41247979	MACS_peak_1792	51.67	0	0	0	0	0	0				MACS_peak_1792	3_TTS	24791	41223008	41246765	+	ITPKC
chr19	41294374	41294510	MACS_peak_1793	61.93	0	0	0	0	0	0				MACS_peak_1793	Intragenic	10297	41284124	41314346	+	RAB4B-EGLN2
chr19	41315308	41315480	MACS_peak_1794	65.34	0	0	0	0	0	0				MACS_peak_1794	Intragenic	1572	41317005	41314348	-	CYP2T1P
chr19	41316257	41316359	MACS_peak_1795	52.04	1	chr19	41316072	41317588	58.27	MACS_peak_14626				MACS_peak_1795	5_TSS	702	41317005	41314348	-	CYP2T1P
chr19	41614379	41614528	MACS_peak_1796	59.13	0	0	0	0	0	0				MACS_peak_1796	5_Proximal	-5857	41620337	41634288	+	CYP2F1_dup1
chr19	41814155	41814405	MACS_peak_1797	50.43	1	chr19	41813587	41817916	347.09	MACS_peak_14635				MACS_peak_1797	5_TSS	-1738	41816068	41830788	+	CCDC97
chr19	41814411	41815470	MACS_peak_1798	396.14	1	chr19	41813587	41817916	347.09	MACS_peak_14635				MACS_peak_1798	5_TSS	-1014	41816068	41830788	+	CCDC97
chr19	41815514	41816490	MACS_peak_1799	547.84	1	chr19	41813587	41817916	347.09	MACS_peak_14635				MACS_peak_1799	5_TSS	154	41816068	41830788	+	CCDC97
chr19	41816687	41816902	MACS_peak_1800	51.02	1	chr19	41813587	41817916	347.09	MACS_peak_14635				MACS_peak_1800	5_TSS	385	41816385	41830788	+	CCDC97_dup1
chr19	41825586	41825759	MACS_peak_1801	52.07	0	0	0	0	0	0				MACS_peak_1801	Intragenic	9239	41816385	41830788	+	CCDC97_dup1
chr19	41830095	41830457	MACS_peak_1802	105.05	1	chr19	41828369	41833041	244.53	MACS_peak_14636				MACS_peak_1802	3_TTS	13981	41816385	41830788	+	CCDC97_dup1
chr19	41830591	41830935	MACS_peak_1803	81.31	1	chr19	41828369	41833041	244.53	MACS_peak_14636				MACS_peak_1803	3_TTS	14428	41816385	41830788	+	CCDC97_dup1
chr19	41830970	41831438	MACS_peak_1804	107.43	1	chr19	41828369	41833041	244.53	MACS_peak_14636				MACS_peak_1804	3_TTS	14814	41816385	41830788	+	CCDC97_dup1
chr19	42375830	42376717	MACS_peak_1805	447.99	1	chr19	42375034	42378676	343.4	MACS_peak_14650				MACS_peak_1805	3_TTS	2586	42373697	42373768	+	MIR6797
chr19	42376877	42377681	MACS_peak_1806	664.77	1	chr19	42375034	42378676	343.4	MACS_peak_14650				MACS_peak_1806	3_TTS	3705	42373697	42373768	+	MIR6797
chr19	42748832	42749303	MACS_peak_1807	82.9	1	chr19	42745422	42751460	241.64	MACS_peak_14660				MACS_peak_1807	5_TSS	-2430	42746736	42734338	-	GSK3A
chr19	42749805	42750019	MACS_peak_1808	55.07	1	chr19	42745422	42751460	241.64	MACS_peak_14660				MACS_peak_1808	5_TSS	-3198	42746736	42734338	-	GSK3A
chr19	42750185	42750938	MACS_peak_1809	164.61	1	chr19	42745422	42751460	241.64	MACS_peak_14660				MACS_peak_1809	5_TSS	-3743	42746736	42734338	-	GSK3A
chr19	42751841	42752252	MACS_peak_1810	100.26	1	chr19	42745422	42751460	241.64	MACS_peak_14660				MACS_peak_1810	5_Proximal	-5228	42746736	42734338	-	GSK3A
chr19	42783983	42784549	MACS_peak_1811	83.53	1	chr19	42782743	42787185	423.34	MACS_peak_14663				MACS_peak_1811	5_TSS	-4647	42788817	42799948	+	CIC_dup1
chr19	42882997	42883269	MACS_peak_1812	78.9	0	0	0	0	0	0				MACS_peak_1812	3_TTS	53375	42829761	42882921	+	MEGF8_dup1
chr19	42915393	42915540	MACS_peak_1813	57.83	0	0	0	0	0	0				MACS_peak_1813	5_Distal	-12473	42927907	43156507	+	LIPE-AS1_dup1
chr19	42917301	42917465	MACS_peak_1814	51.29	0	0	0	0	0	0				MACS_peak_1814	5_Distal	-10508	42927907	43156507	+	LIPE-AS1_dup1
chr19	43949058	43949158	MACS_peak_1815	51.57	0	0	0	0	0	0				MACS_peak_1815	3_Distal	20719	43969831	43964946	-	LYPD3
chr19	43970371	43970566	MACS_peak_1816	57.55	0	0	0	0	0	0				MACS_peak_1816	5_TSS	-686	43969831	43964946	-	LYPD3
chr19	44031050	44031388	MACS_peak_1817	78.12	1	chr19	44028652	44032644	297.49	MACS_peak_14692				MACS_peak_1817	5_Proximal	-6053	44037340	44040284	+	ZNF575
chr19	44037863	44038144	MACS_peak_1818	65.79	1	chr19	44035805	44039363	330.19	MACS_peak_14693				MACS_peak_1818	5_TSS	669	44037340	44040284	+	ZNF575
chr19	44100651	44100881	MACS_peak_1819	53.49	1	chr19	44099112	44102124	493.18	MACS_peak_14694				MACS_peak_1819	5_TSS	29	44100738	44104587	+	ZNF576_dup1
chr19	44231080	44231258	MACS_peak_1820	50.07	0	0	0	0	0	0				MACS_peak_1820	3_TTS	28019	44259188	44232149	-	SMG9
chr19	44524647	44524870	MACS_peak_1821	55.93	0	0	0	0	0	0				MACS_peak_1821	5_TSS	-4711	44529494	44537262	+	ZNF222_dup1
chr19	44615062	44615374	MACS_peak_1822	81.14	0	0	0	0	0	0				MACS_peak_1822	3_TTS	16844	44598482	44613983	+	ZNF224_dup1
chr19	44615884	44616091	MACS_peak_1823	54.77	1	chr19	44616000	44618888	94.15	MACS_peak_14711				MACS_peak_1823	3_TTS	17504	44598482	44613983	+	ZNF224_dup1
chr19	45246366	45246555	MACS_peak_1824	55.17	1	chr19	45244044	45246977	338.65	MACS_peak_14733				MACS_peak_1824	5_Distal	-15500	45261914	45261978	+	MIR8085
chr19	45307635	45307837	MACS_peak_1825	57.15	1	chr19	45306445	45308922	68.12	MACS_peak_14741				MACS_peak_1825	5_TSS	-4570	45312316	45324678	+	BCAM_dup1
chr19	45308495	45308858	MACS_peak_1826	63.66	1	chr19	45306445	45308922	68.12	MACS_peak_14741				MACS_peak_1826	5_TSS	-3783	45312316	45324678	+	BCAM_dup1
chr19	45309099	45309289	MACS_peak_1827	50.73	1	chr19	45306445	45308922	68.12	MACS_peak_14741				MACS_peak_1827	5_TSS	-3120	45312316	45324678	+	BCAM_dup1
chr19	45309625	45309764	MACS_peak_1828	53.11	1	chr19	45309018	45314069	572.58	MACS_peak_14742				MACS_peak_1828	5_TSS	-2597	45312316	45324678	+	BCAM_dup1
chr19	45309838	45310071	MACS_peak_1829	61.6	1	chr19	45309018	45314069	572.58	MACS_peak_14742				MACS_peak_1829	5_TSS	-2374	45312316	45324678	+	BCAM_dup1
chr19	45310286	45310652	MACS_peak_1830	104.07	1	chr19	45309018	45314069	572.58	MACS_peak_14742				MACS_peak_1830	5_TSS	-1937	45312316	45324678	+	BCAM_dup1
chr19	45311527	45312695	MACS_peak_1831	432.74	1	chr19	45309018	45314069	572.58	MACS_peak_14742				MACS_peak_1831	5_TSS	-165	45312316	45324678	+	BCAM_dup1
chr19	45325605	45325809	MACS_peak_1832	53.58	0	0	0	0	0	0				MACS_peak_1832	3_TTS	13405	45312316	45324678	+	BCAM_dup1
chr19	45393388	45393967	MACS_peak_1833	133.69	1	chr19	45392516	45396242	1264.66	MACS_peak_14745				MACS_peak_1833	5_TSS	-718	45394477	45406946	+	TOMM40_dup1
chr19	45407348	45407562	MACS_peak_1834	67.26	1	chr19	45406260	45408415	51.53	MACS_peak_14746				MACS_peak_1834	5_TSS	-1552	45409006	45412652	+	APOE_dup1
chr19	45407767	45408136	MACS_peak_1835	130.7	1	chr19	45406260	45408415	51.53	MACS_peak_14746				MACS_peak_1835	5_TSS	-1097	45409006	45412652	+	APOE_dup1
chr19	45408622	45408799	MACS_peak_1836	79.07	1	chr19	45406260	45408415	51.53	MACS_peak_14746				MACS_peak_1836	5_TSS	-271	45409006	45412652	+	APOE_dup1
chr19	45498506	45498739	MACS_peak_1837	53.58	0	0	0	0	0	0				MACS_peak_1837	5_Proximal	-6090	45504707	45541456	+	RELB
chr19	45525713	45525841	MACS_peak_1838	54.31	0	0	0	0	0	0				MACS_peak_1838	5_Distal	-16544	45542298	45574214	+	CLASRP_dup1
chr19	45582383	45582539	MACS_peak_1839	73.8	1	chr19	45577341	45584528	662.89	MACS_peak_14752				MACS_peak_1839	5_TSS	22	45582453	45594174	+	GEMIN7
chr19	45594381	45594685	MACS_peak_1840	54.76	1	chr19	45593509	45597733	533.79	MACS_peak_14753				MACS_peak_1840	5_TSS	-919	45593649	45588587	-	LOC105372419
chr19	45594703	45595248	MACS_peak_1841	271.71	1	chr19	45593509	45597733	533.79	MACS_peak_14753				MACS_peak_1841	5_TSS	-1330	45593649	45588587	-	LOC105372419
chr19	45595259	45595497	MACS_peak_1842	92.36	1	chr19	45593509	45597733	533.79	MACS_peak_14753				MACS_peak_1842	5_TSS	-1125	45596431	45650543	+	PPP1R37
chr19	45808218	45808516	MACS_peak_1843	59.54	0	0	0	0	0	0				MACS_peak_1843	3_TTS	17823	45826235	45809671	-	CKM
chr19	45852012	45852223	MACS_peak_1844	58.67	0	0	0	0	0	0				MACS_peak_1844	3_TTS	21718	45873845	45854649	-	ERCC2
chr19	45852583	45852744	MACS_peak_1845	51.45	0	0	0	0	0	0				MACS_peak_1845	3_TTS	21149	45873845	45854649	-	ERCC2
chr19	45889020	45889562	MACS_peak_1846	114.61	0	0	0	0	0	0				MACS_peak_1846	5_Distal	-15453	45873845	45854649	-	ERCC2
chr19	45910020	45910341	MACS_peak_1847	53.7	1	chr19	45904483	45911357	852.07	MACS_peak_14762				MACS_peak_1847	5_TSS	-661	45909607	45882892	-	PPP1R13L
chr19	46185019	46185346	MACS_peak_1848	56.7	1	chr19	46183867	46186109	94.31	MACS_peak_14787				MACS_peak_1848	5_Proximal	-6959	46178266	46178190	-	MIR642B
chr19	46186218	46186414	MACS_peak_1849	58.38	1	chr19	46183867	46186109	94.31	MACS_peak_14787				MACS_peak_1849	5_Proximal	-8081	46178266	46178190	-	MIR642B
chr19	46186508	46186851	MACS_peak_1850	94.57	1	chr19	46183867	46186109	94.31	MACS_peak_14787				MACS_peak_1850	5_Proximal	-8336	46178266	46178190	-	MIR642B
chr19	46208353	46208480	MACS_peak_1851	51.15	0	0	0	0	0	0				MACS_peak_1851	3_TTS	12688	46195741	46207248	+	QPCTL_dup1
chr19	46211662	46211778	MACS_peak_1852	50.87	0	0	0	0	0	0				MACS_peak_1852	3_TTS	6805	46218536	46213887	-	FBXO46_dup2
chr19	46220154	46220757	MACS_peak_1853	269.54	1	chr19	46218692	46222337	271.32	MACS_peak_14789				MACS_peak_1853	5_TSS	-2041	46218536	46213887	-	FBXO46_dup2
chr19	46268431	46268605	MACS_peak_1854	54.14	0	0	0	0	0	0				MACS_peak_1854	3_TTS	3942	46272497	46268043	-	SIX5
chr19	46272681	46274588	MACS_peak_1855	670.75	1	chr19	46269535	46275221	871.66	MACS_peak_14791				MACS_peak_1855	5_TSS	-824	46272497	46268043	-	SIX5
chr19	46282594	46283101	MACS_peak_1856	107.88	1	chr19	46281678	46284291	84.98	MACS_peak_14792				MACS_peak_1856	5_TSS	147	46282877	46272967	-	DMPK_dup4
chr19	46285104	46285427	MACS_peak_1857	88.12	0	0	0	0	0	0				MACS_peak_1857	5_TSS	491	46285815	46272967	-	DMPK_dup2
chr19	46286181	46286527	MACS_peak_1858	82.62	0	0	0	0	0	0				MACS_peak_1858	5_TSS	-606	46285815	46272967	-	DMPK_dup2
chr19	46286946	46287170	MACS_peak_1859	50.43	0	0	0	0	0	0				MACS_peak_1859	5_TSS	-1311	46285815	46272967	-	DMPK_dup2
chr19	46378683	46378870	MACS_peak_1860	54.09	0	0	0	0	0	0				MACS_peak_1860	3_TTS	11255	46367518	46377055	+	FOXA3
chr19	46388777	46389036	MACS_peak_1861	59.62	1	chr19	46387762	46391558	598.06	MACS_peak_14796				MACS_peak_1861	5_TSS	612	46389428	46386865	-	IRF2BP1
chr19	46389802	46390223	MACS_peak_1862	93.84	1	chr19	46387762	46391558	598.06	MACS_peak_14796				MACS_peak_1862	5_TSS	-630	46389428	46386865	-	IRF2BP1
chr19	46390605	46390779	MACS_peak_1863	59.46	1	chr19	46387762	46391558	598.06	MACS_peak_14796				MACS_peak_1863	5_TSS	-1283	46389428	46386865	-	IRF2BP1
chr19	46694302	46694680	MACS_peak_1864	105.8	1	chr19	46692743	46698645	635.06	MACS_peak_14805				MACS_peak_1864	Intragenic	11919	46706319	46692286	-	IGFL2-AS1
chr19	46694778	46695112	MACS_peak_1865	82.47	1	chr19	46692743	46698645	635.06	MACS_peak_14805				MACS_peak_1865	Intragenic	11282	46706319	46692286	-	IGFL2-AS1
chr19	46696431	46696727	MACS_peak_1866	129.45	1	chr19	46692743	46698645	635.06	MACS_peak_14805				MACS_peak_1866	Intragenic	9836	46706319	46692286	-	IGFL2-AS1
chr19	46696826	46697315	MACS_peak_1867	94.41	1	chr19	46692743	46698645	635.06	MACS_peak_14805				MACS_peak_1867	Intragenic	9351	46706319	46692286	-	IGFL2-AS1
chr19	46897606	46898127	MACS_peak_1868	98.79	0	0	0	0	0	0				MACS_peak_1868	3_TTS	47615	46850251	46894232	+	PPP5C_dup1
chr19	46899754	46899974	MACS_peak_1869	51.02	0	0	0	0	0	0				MACS_peak_1869	3_Proximal	49612	46850251	46894232	+	PPP5C_dup1
chr19	47017086	47017289	MACS_peak_1870	56.92	0	0	0	0	0	0				MACS_peak_1870	5_Distal	-17988	46999169	46994448	-	PNMAL2
chr19	47104175	47104415	MACS_peak_1871	50.94	1	chr19	47102524	47107889	640.4	MACS_peak_14821				MACS_peak_1871	5_TSS	-43	47104331	47114039	+	CALM3
chr19	47114169	47114922	MACS_peak_1872	257.53	0	0	0	0	0	0				MACS_peak_1872	3_TTS	9379	47105329	47114039	+	CALM3_dup6
chr19	47220199	47220911	MACS_peak_1873	197.42	1	chr19	47216280	47221953	603.02	MACS_peak_14825				MACS_peak_1873	5_TSS	75	47220384	47177573	-	PRKD2_dup1
chr19	47273239	47273419	MACS_peak_1874	51.02	0	0	0	0	0	0				MACS_peak_1874	3_TTS	14852	47288134	47278140	-	SLC1A5
chr19	47275849	47276089	MACS_peak_1875	59.39	0	0	0	0	0	0				MACS_peak_1875	3_TTS	12175	47288134	47278140	-	SLC1A5
chr19	47276318	47276713	MACS_peak_1876	144.15	0	0	0	0	0	0				MACS_peak_1876	3_TTS	11619	47288134	47278140	-	SLC1A5
chr19	47277014	47277321	MACS_peak_1877	127.03	0	0	0	0	0	0				MACS_peak_1877	3_TTS	10949	47288134	47278140	-	SLC1A5
chr19	47509338	47509513	MACS_peak_1878	63.43	1	chr19	47507878	47510028	54.66	MACS_peak_14838				MACS_peak_1878	5_Distal	-13668	47523101	47549033	+	NPAS1
chr19	47551245	47552169	MACS_peak_1879	429.25	1	chr19	47550052	47553009	882.64	MACS_peak_14840				MACS_peak_1879	5_TSS	-30	47551882	47549167	-	TMEM160
chr19	47721775	47721909	MACS_peak_1880	53.48	0	0	0	0	0	0				MACS_peak_1880	5_Proximal	-8339	47730199	47730278	+	MIR3190
chr19	47723229	47723381	MACS_peak_1881	56.17	0	0	0	0	0	0				MACS_peak_1881	5_Proximal	-6922	47730199	47730278	+	MIR3190
chr19	47740497	47740708	MACS_peak_1882	51.02	0	0	0	0	0	0				MACS_peak_1882	5_TSS	-4580	47736023	47724079	-	BBC3_dup1
chr19	47776886	47777190	MACS_peak_1883	73.78	1	chr19	47775485	47779223	807.08	MACS_peak_14853				MACS_peak_1883	5_TSS	-519	47777659	47778980	+	INAFM1
chr19	47886753	47887015	MACS_peak_1884	98.19	0	0	0	0	0	0				MACS_peak_1884	3_TTS	34375	47852538	47885961	+	DHX34
chr19	47887398	47887617	MACS_peak_1885	70.36	0	0	0	0	0	0				MACS_peak_1885	3_TTS	34984	47852538	47885961	+	DHX34
chr19	47987187	47987389	MACS_peak_1886	66.69	1	chr19	47986077	47988645	505.2	MACS_peak_14857				MACS_peak_1886	5_TSS	244	47987521	47978398	-	KPTN_dup1
chr19	47987407	47987867	MACS_peak_1887	125.17	1	chr19	47986077	47988645	505.2	MACS_peak_14857				MACS_peak_1887	5_TSS	22	47987539	48004854	+	NAPA-AS1
chr19	48246270	48246866	MACS_peak_1888	194.18	1	chr19	48245210	48250135	764.58	MACS_peak_14871				MACS_peak_1888	5_TSS	-2005	48248793	48260323	+	NOP53
chr19	48246879	48247313	MACS_peak_1889	124.81	1	chr19	48245210	48250135	764.58	MACS_peak_14871				MACS_peak_1889	5_TSS	-1816	48248793	48260323	+	NOP53
chr19	48264868	48265150	MACS_peak_1890	71.44	0	0	0	0	0	0				MACS_peak_1890	3_TTS	16234	48248793	48260323	+	NOP53
chr19	48334571	48334684	MACS_peak_1891	68.99	0	0	0	0	0	0				MACS_peak_1891	Intragenic	9528	48325097	48346586	+	CRX
chr19	48615338	48615658	MACS_peak_1892	79.42	1	chr19	48612792	48614944	93.45	MACS_peak_14875				MACS_peak_1892	5_TSS	-1457	48614109	48551100	-	PLA2G4C_dup1
chr19	48615664	48615941	MACS_peak_1893	91.44	0	0	0	0	0	0				MACS_peak_1893	5_TSS	-1757	48614109	48551100	-	PLA2G4C_dup1
chr19	48684404	48684611	MACS_peak_1894	53.67	0	0	0	0	0	0				MACS_peak_1894	Intragenic	10550	48673949	48700877	+	C19orf68
chr19	48898416	48898632	MACS_peak_1895	72.59	0	0	0	0	0	0				MACS_peak_1895	5_TSS	-3752	48894810	48885827	-	KDELR1
chr19	48948690	48949616	MACS_peak_1896	312.71	1	chr19	48947577	48950846	311.3	MACS_peak_14892				MACS_peak_1896	5_TSS	250	48949030	48957164	+	GRWD1
chr19	48970565	48970722	MACS_peak_1897	53.54	0	0	0	0	0	0				MACS_peak_1897	5_TSS	-1801	48972465	48985571	+	CYTH2_dup1
chr19	48986902	48987282	MACS_peak_1898	69.03	0	0	0	0	0	0				MACS_peak_1898	3_TTS	14711	48972465	48985571	+	CYTH2_dup1
chr19	48997022	48997587	MACS_peak_1899	130.24	1	chr19	48995094	48998037	238.26	MACS_peak_14895				MACS_peak_1899	Intragenic	19298	49016446	48988528	-	LMTK3
chr19	49117394	49118421	MACS_peak_1900	427.65	1	chr19	49116139	49119444	195.13	MACS_peak_14907				MACS_peak_1900	5_TSS	-1432	49116694	49103857	-	FAM83E
chr19	49127563	49127764	MACS_peak_1901	65.16	1	chr19	49126135	49129340	169.97	MACS_peak_14909				MACS_peak_1901	5_TSS	-572	49128209	49133663	+	SPHK2_dup4
chr19	49207184	49207352	MACS_peak_1902	53.58	0	0	0	0	0	0				MACS_peak_1902	5_TSS	-164	49207105	49205707	-	LOC105447645
chr19	49248455	49248734	MACS_peak_1903	63.54	1	chr19	49247677	49250692	127.23	MACS_peak_14923				MACS_peak_1903	5_TSS	687	49249189	49244145	-	IZUMO1_dup1
chr19	49298304	49298829	MACS_peak_1904	77.59	1	chr19	49297399	49299962	79.34	MACS_peak_14929				MACS_peak_1904	3_TTS	15771	49314320	49298319	-	BCAT2_dup1
chr19	49427894	49427993	MACS_peak_1905	60.87	0	0	0	0	0	0				MACS_peak_1905	5_Proximal	-5794	49422148	49414187	-	NUCB1-AS1
chr19	49465322	49465970	MACS_peak_1906	180.44	1	chr19	49464465	49472587	1118.14	MACS_peak_14941				MACS_peak_1906	5_TSS	-2961	49468566	49470136	+	FTL
chr19	49469678	49469877	MACS_peak_1907	59.97	1	chr19	49464465	49472587	1118.14	MACS_peak_14941				MACS_peak_1907	3_TTS	1237	49468566	49470136	+	FTL
chr19	49470092	49470465	MACS_peak_1908	81.52	1	chr19	49464465	49472587	1118.14	MACS_peak_14941				MACS_peak_1908	3_TTS	1644	49468566	49470136	+	FTL
chr19	49471247	49471583	MACS_peak_1909	53.44	1	chr19	49464465	49472587	1118.14	MACS_peak_14941				MACS_peak_1909	3_TTS	2725	49468566	49470136	+	FTL
chr19	49521148	49521294	MACS_peak_1910	50.21	0	0	0	0	0	0				MACS_peak_1910	5_TSS	-846	49520347	49519237	-	LHB
chr19	49521310	49521610	MACS_peak_1911	130.58	0	0	0	0	0	0				MACS_peak_1911	5_TSS	-1115	49520347	49519237	-	LHB
chr19	49522467	49522578	MACS_peak_1912	56.48	0	0	0	0	0	0				MACS_peak_1912	5_TSS	222	49522741	49521505	-	LOC101059948
chr19	49523543	49523719	MACS_peak_1913	65.48	0	0	0	0	0	0				MACS_peak_1913	5_TSS	-930	49522741	49521505	-	LOC101059948
chr19	49524005	49524151	MACS_peak_1914	62.37	0	0	0	0	0	0				MACS_peak_1914	5_TSS	-1332	49522741	49521505	-	LOC101059948
chr19	49524167	49524636	MACS_peak_1915	196.78	0	0	0	0	0	0				MACS_peak_1915	5_TSS	-1773	49522741	49521505	-	LOC101059948
chr19	49653514	49653826	MACS_peak_1916	76.12	1	chr19	49651006	49656162	440.22	MACS_peak_14948				MACS_peak_1916	3_TTS	5119	49658681	49654456	-	HRC
chr19	49653833	49654257	MACS_peak_1917	71.99	1	chr19	49651006	49656162	440.22	MACS_peak_14948				MACS_peak_1917	3_TTS	4534	49658681	49654456	-	HRC
chr19	49719418	49719575	MACS_peak_1918	50.48	0	0	0	0	0	0				MACS_peak_1918	3_TTS	58471	49661016	49715098	+	TRPM4_dup4
chr19	49995548	49996700	MACS_peak_1919	716.77	1	chr19	49994876	49998009	215.18	MACS_peak_14955				MACS_peak_1919	3_TTS	2042	49994432	49994517	+	SNORD35A
chr19	49996924	49997102	MACS_peak_1920	89.05	1	chr19	49994876	49998009	215.18	MACS_peak_14955				MACS_peak_1920	3_TTS	2537	49994432	49994517	+	SNORD35A
chr19	50003385	50004309	MACS_peak_1921	307.4	1	chr19	50002647	50005265	150.38	MACS_peak_14957				MACS_peak_1921	5_TSS	73	50004125	50004042	-	MIR150
chr19	50094201	50094657	MACS_peak_1922	75.94	1	chr19	50092310	50098049	1266.06	MACS_peak_14961				MACS_peak_1922	5_TSS	-581	50094900	50129696	+	PRR12
chr19	50095096	50095274	MACS_peak_1923	50.57	1	chr19	50092310	50098049	1266.06	MACS_peak_14961				MACS_peak_1923	5_TSS	311	50094900	50129696	+	PRR12
chr19	50134196	50134347	MACS_peak_1924	56.48	0	0	0	0	0	0				MACS_peak_1924	3_TTS	9159	50143400	50138549	-	RRAS
chr19	50134548	50134777	MACS_peak_1925	80.44	0	0	0	0	0	0				MACS_peak_1925	3_TTS	8709	50143400	50138549	-	RRAS
chr19	50138494	50138778	MACS_peak_1926	122.26	0	0	0	0	0	0				MACS_peak_1926	3_TTS	4671	50143400	50138549	-	RRAS
chr19	50138846	50139123	MACS_peak_1927	72.41	0	0	0	0	0	0				MACS_peak_1927	3_TTS	4386	50143400	50138549	-	RRAS
chr19	50163026	50163230	MACS_peak_1928	51.93	0	0	0	0	0	0				MACS_peak_1928	5_Proximal	-5291	50168399	50177173	+	BCL2L12_dup10
chr19	50166643	50166843	MACS_peak_1929	57.26	1	chr19	50166555	50170371	322.38	MACS_peak_14965				MACS_peak_1929	5_TSS	-1648	50168399	50177173	+	BCL2L12_dup10
chr19	50167635	50167893	MACS_peak_1930	62.88	1	chr19	50166555	50170371	322.38	MACS_peak_14965				MACS_peak_1930	5_TSS	-629	50168399	50177173	+	BCL2L12_dup10
chr19	50192178	50192358	MACS_peak_1931	63.41	1	chr19	50191976	50195617	137.15	MACS_peak_14967				MACS_peak_1931	5_TSS	283	50191942	50194247	+	ADM5
chr19	50192626	50192986	MACS_peak_1932	69.15	1	chr19	50191976	50195617	137.15	MACS_peak_14967				MACS_peak_1932	5_TSS	769	50191942	50194247	+	ADM5
chr19	50193182	50193481	MACS_peak_1933	106.09	1	chr19	50191976	50195617	137.15	MACS_peak_14967				MACS_peak_1933	5_TSS	-997	50194365	50216988	+	CPT1C_dup1
chr19	50193901	50194262	MACS_peak_1934	117.76	1	chr19	50191976	50195617	137.15	MACS_peak_14967				MACS_peak_1934	5_TSS	-361	50194365	50216988	+	CPT1C_dup1
chr19	50194285	50194451	MACS_peak_1935	52.48	1	chr19	50191976	50195617	137.15	MACS_peak_14967				MACS_peak_1935	5_TSS	-38	50194365	50216988	+	CPT1C_dup1
chr19	50359006	50359215	MACS_peak_1936	80.02	1	chr19	50357235	50361672	481.25	MACS_peak_14973				MACS_peak_1936	3_TTS	1246	50357848	50357908	+	MIR4749
chr19	50359553	50359805	MACS_peak_1937	68.84	1	chr19	50357235	50361672	481.25	MACS_peak_14973				MACS_peak_1937	3_TTS	1907	50357848	50357908	+	MIR4749
chr19	50359834	50360257	MACS_peak_1938	87.78	1	chr19	50357235	50361672	481.25	MACS_peak_14973				MACS_peak_1938	3_TTS	2097	50357848	50357908	+	MIR4749
chr19	50360797	50360948	MACS_peak_1939	51.35	1	chr19	50357235	50361672	481.25	MACS_peak_14973				MACS_peak_1939	Intragenic	1685	50362546	50359722	-	PTOV1-AS2
chr19	50361031	50361211	MACS_peak_1940	50.82	1	chr19	50357235	50361672	481.25	MACS_peak_14973				MACS_peak_1940	Intragenic	1384	50362546	50359722	-	PTOV1-AS2
chr19	50371005	50371235	MACS_peak_1941	52.07	1	chr19	50369297	50372131	258.74	MACS_peak_14974				MACS_peak_1941	5_TSS	-306	50370822	50364460	-	PNKP
chr19	50372528	50373352	MACS_peak_1942	155.94	1	chr19	50371461	50374464	343.72	MACS_peak_14975				MACS_peak_1942	5_TSS	-2225	50370822	50364460	-	PNKP
chr19	50377107	50377322	MACS_peak_1943	55.68	0	0	0	0	0	0				MACS_peak_1943	Intragenic	2309	50379506	50372290	-	AKT1S1_dup4
chr19	50390660	50390811	MACS_peak_1944	59	0	0	0	0	0	0				MACS_peak_1944	5_TSS	-670	50391432	50391487	+	MIR4750
chr19	50393610	50393784	MACS_peak_1945	58.86	0	0	0	0	0	0				MACS_peak_1945	3_TTS	2234	50391432	50391487	+	MIR4750
chr19	50487245	50487377	MACS_peak_1946	55.35	0	0	0	0	0	0				MACS_peak_1946	3_Proximal	14446	50472857	50479076	+	SIGLEC16_dup1
chr19	50708686	50708868	MACS_peak_1947	53.76	1	chr19	50705381	50710426	732.1	MACS_peak_14984				MACS_peak_1947	5_Distal	-42218	50666538	50655805	-	IZUMO2_dup1
chr19	50815411	50815627	MACS_peak_1948	87.17	0	0	0	0	0	0				MACS_peak_1948	3_TTS	17190	50832634	50818765	-	KCNC3_dup1
chr19	50828822	50828974	MACS_peak_1949	51.08	1	chr19	50828024	50830034	78.85	MACS_peak_14986				MACS_peak_1949	3_Proximal	19080	50848005	50837057	-	NAPSB
chr19	50886431	50886763	MACS_peak_1950	150.7	1	chr19	50885954	50889390	181.14	MACS_peak_14991				MACS_peak_1950	5_TSS	-887	50887580	50921275	+	POLD1_dup1
chr19	50886780	50887492	MACS_peak_1951	350.11	1	chr19	50885954	50889390	181.14	MACS_peak_14991				MACS_peak_1951	5_TSS	-406	50887580	50921275	+	POLD1_dup1
chr19	51165681	51165811	MACS_peak_1952	50.76	0	0	0	0	0	0				MACS_peak_1952	3_TTS	13041	51152702	51162567	+	C19orf81
chr19	51295467	51295660	MACS_peak_1953	50.64	1	chr19	51296075	51300052	474.56	MACS_peak_14998				MACS_peak_1953	Intragenic	1876	51293672	51298481	+	ACPT
chr19	51296678	51299017	MACS_peak_1954	1750.73	1	chr19	51296075	51300052	474.56	MACS_peak_14998				MACS_peak_1954	3_TTS	4099	51302382	51302286	-	SNORD88B
chr19	51299018	51299602	MACS_peak_1955	194.39	1	chr19	51296075	51300052	474.56	MACS_peak_14998				MACS_peak_1955	3_TTS	2891	51302382	51302286	-	SNORD88B
chr19	51299693	51300174	MACS_peak_1956	227.12	1	chr19	51296075	51300052	474.56	MACS_peak_14998				MACS_peak_1956	3_TTS	2316	51302382	51302286	-	SNORD88B
chr19	51693460	51693624	MACS_peak_1957	65.48	0	0	0	0	0	0				MACS_peak_1957	5_Proximal	-8309	51685222	51656180	-	LOC101928517
chr19	52125717	52125801	MACS_peak_1958	50.16	0	0	0	0	0	0				MACS_peak_1958	Intragenic	7969	52133727	52114756	-	SIGLEC5
chr19	52206105	52206368	MACS_peak_1959	54.08	1	chr19	52204690	52207377	60.16	MACS_peak_15020				MACS_peak_1959	5_Proximal	-9583	52196709	52188616	-	SPACA6P-AS
chr19	52212105	52212343	MACS_peak_1960	64.22	0	0	0	0	0	0				MACS_peak_1960	3_TTS	14973	52227245	52216365	-	HAS1_dup1
chr19	52212857	52213077	MACS_peak_1961	60.85	0	0	0	0	0	0				MACS_peak_1961	3_TTS	14269	52227245	52216365	-	HAS1_dup1
chr19	52217101	52217444	MACS_peak_1962	57.19	1	chr19	52214952	52217609	76.68	MACS_peak_15021				MACS_peak_1962	3_TTS	10100	52227245	52216365	-	HAS1_dup1
chr19	52217975	52218264	MACS_peak_1963	63.47	1	chr19	52214952	52217609	76.68	MACS_peak_15021				MACS_peak_1963	Intragenic	9111	52227245	52216365	-	HAS1_dup1
chr19	52351032	52351464	MACS_peak_1964	84.54	0	0	0	0	0	0				MACS_peak_1964	3_Proximal	40052	52391189	52359056	-	ZNF577
chr19	52551596	52551839	MACS_peak_1965	53.75	1	chr19	52550560	52553860	266.33	MACS_peak_15031				MACS_peak_1965	5_TSS	115	52551814	52534632	-	ZNF432_dup1
chr19	52551854	52552682	MACS_peak_1966	205.93	1	chr19	52550560	52553860	266.33	MACS_peak_15031				MACS_peak_1966	5_TSS	-163	52552377	52534632	-	ZNF432
chr19	52630012	52630197	MACS_peak_1967	51.27	0	0	0	0	0	0				MACS_peak_1967	Intragenic	13100	52643191	52616345	-	ZNF616_dup1
chr19	53074666	53074808	MACS_peak_1968	60.82	0	0	0	0	0	0				MACS_peak_1968	5_TSS	844	53073917	53090427	+	ZNF701_dup1
chr19	53426087	53426373	MACS_peak_1969	157.21	1	chr19	53425450	53427697	256.53	MACS_peak_15044				MACS_peak_1969	5_Proximal	-5047	53421184	53409146	-	ZNF888
chr19	53426497	53426777	MACS_peak_1970	83.53	1	chr19	53425450	53427697	256.53	MACS_peak_15044				MACS_peak_1970	5_Proximal	-5445	53421184	53409146	-	ZNF888
chr19	53428315	53428460	MACS_peak_1971	60.09	0	0	0	0	0	0				MACS_peak_1971	5_Proximal	-7219	53421184	53409146	-	ZNF888
chr19	53935241	53935424	MACS_peak_1972	79.84	1	chr19	53933912	53936210	213.35	MACS_peak_15049				MACS_peak_1972	5_TSS	97	53935227	53947925	+	TPM3P9
chr19	54024250	54024413	MACS_peak_1973	54.49	0	0	0	0	0	0				MACS_peak_1973	5_TSS	188	54024177	54083523	+	ZNF331_dup1
chr19	54292863	54293417	MACS_peak_1974	267.36	1	chr19	54289259	54295818	1756.13	MACS_peak_15068				MACS_peak_1974	3_TTS	1275	54291959	54292027	+	MIR373
chr19	54293476	54293870	MACS_peak_1975	238.79	1	chr19	54289259	54295818	1756.13	MACS_peak_15068				MACS_peak_1975	3_TTS	1716	54291959	54292027	+	MIR373
chr19	54294137	54294575	MACS_peak_1976	114.76	1	chr19	54289259	54295818	1756.13	MACS_peak_15068				MACS_peak_1976	3_TTS	2463	54291959	54292027	+	MIR373
chr19	54294701	54294987	MACS_peak_1977	63.41	1	chr19	54289259	54295818	1756.13	MACS_peak_15068				MACS_peak_1977	3_TTS	2799	54291959	54292027	+	MIR373
chr19	54297448	54297614	MACS_peak_1978	51.92	1	chr19	54295301	54297468	81.55	MACS_peak_15069				MACS_peak_1978	3_TTS	30142	54327657	54296855	-	NLRP12_dup1
chr19	54369536	54369742	MACS_peak_1979	51.22	1	chr19	54368385	54373765	852.22	MACS_peak_15074				MACS_peak_1979	5_TSS	228	54369412	54379689	+	MYADM_dup1
chr19	54488256	54488523	MACS_peak_1980	79.68	1	chr19	54479874	54488007	770.51	MACS_peak_15078				MACS_peak_1980	3_TTS	2823	54485561	54485651	+	MIR935
chr19	54489352	54489531	MACS_peak_1981	59.48	1	chr19	54488538	54490775	67.36	MACS_peak_15079				MACS_peak_1981	3_TTS	3871	54485561	54485651	+	MIR935
chr19	54491219	54491445	MACS_peak_1982	78.73	1	chr19	54488538	54490775	67.36	MACS_peak_15079				MACS_peak_1982	5_TSS	-3115	54494403	54515920	+	CACNG6
chr19	54492707	54493618	MACS_peak_1983	215.1	1	chr19	54491724	54494300	152.23	MACS_peak_15080				MACS_peak_1983	5_TSS	-1598	54494403	54515920	+	CACNG6
chr19	54494614	54495047	MACS_peak_1984	104.88	1	chr19	54493710	54496157	188.06	MACS_peak_15081				MACS_peak_1984	5_TSS	343	54494403	54515920	+	CACNG6
chr19	54495058	54495177	MACS_peak_1985	65.36	1	chr19	54493710	54496157	188.06	MACS_peak_15081				MACS_peak_1985	5_TSS	-425	54495542	54515920	+	CACNG6_dup1
chr19	54618938	54619280	MACS_peak_1986	81.4	1	chr19	54617373	54620110	267.63	MACS_peak_15087				MACS_peak_1986	5_TSS	21	54619055	54610320	-	TFPT_dup1
chr19	54676494	54677339	MACS_peak_1987	410.28	1	chr19	54675538	54678446	186.47	MACS_peak_15091				MACS_peak_1987	5_TSS	-162	54676944	54663833	-	TMC4_dup1
chr19	54677416	54677675	MACS_peak_1988	57.26	1	chr19	54675538	54678446	186.47	MACS_peak_15091				MACS_peak_1988	5_TSS	-681	54676944	54663833	-	TMC4_dup1
chr19	54703403	54703692	MACS_peak_1989	63.05	1	chr19	54703301	54706563	312.52	MACS_peak_15093				MACS_peak_1989	5_TSS	-1129	54704726	54711515	+	RPS9_dup1
chr19	54712336	54714029	MACS_peak_1990	353.16	1	chr19	54711309	54715755	111.24	MACS_peak_15094				MACS_peak_1990	3_TTS	8262	54704762	54711515	+	RPS9_dup7
chr19	54714030	54714328	MACS_peak_1991	63.66	1	chr19	54711309	54715755	111.24	MACS_peak_15094				MACS_peak_1991	3_TTS	9487	54704762	54711515	+	RPS9_dup7
chr19	54714855	54715245	MACS_peak_1992	57.93	1	chr19	54711309	54715755	111.24	MACS_peak_15094				MACS_peak_1992	3_TTS	10200	54704762	54711515	+	RPS9_dup7
chr19	54940257	54940532	MACS_peak_1993	56.83	0	0	0	0	0	0				MACS_peak_1993	Intragenic	13753	54926605	54947899	+	TTYH1_dup1
chr19	54941601	54942666	MACS_peak_1994	530.36	0	0	0	0	0	0				MACS_peak_1994	Intragenic	15511	54926605	54947899	+	TTYH1_dup1
chr19	54943596	54943792	MACS_peak_1995	70.45	0	0	0	0	0	0				MACS_peak_1995	3_Distal	16504	54960216	54955994	-	LENG8-AS1
chr19	54945174	54945398	MACS_peak_1996	56.85	0	0	0	0	0	0				MACS_peak_1996	3_Distal	14919	54960216	54955994	-	LENG8-AS1
chr19	54945563	54945788	MACS_peak_1997	71.16	0	0	0	0	0	0				MACS_peak_1997	3_Distal	14534	54960216	54955994	-	LENG8-AS1
chr19	54972642	54972974	MACS_peak_1998	63.14	1	chr19	54972424	54977007	506.27	MACS_peak_15097				MACS_peak_1998	3_TTS	2126	54974894	54972978	-	LENG9
[truncated: 1,530 more rows]

## Sheet: FXR1_vs_H3K4me3-H358
FXR1-H3K4me3 overlap
FXR1 chrom	FXR1 start	FXR1 end	FXR1 ID	FXR1 score	If Overlap	H3K4me3 chrom	H3K4me3 start	H3K4me3 end	H3K4me3 score	H3K4me3 ID	326 in 882 = 0.369615
chr1	5364816	5364953	MACS_peak_1	66.93	0	0	0	0	0	0
chr1	6761826	6761980	MACS_peak_2	62.37	1	chr1	6759667	6763039	3100	MACS_peak_189
chr1	7802448	7802593	MACS_peak_3	55.2	0	0	0	0	0	0
chr1	8304324	8304458	MACS_peak_4	54.56	0	0	0	0	0	0
chr1	10739700	10740161	MACS_peak_5	378.91	0	0	0	0	0	0
chr1	10856617	10857026	MACS_peak_6	442.96	1	chr1	10852040	10858087	3100	MACS_peak_301
chr1	17565722	17565902	MACS_peak_7	70.25	0	0	0	0	0	0
chr1	17565929	17566277	MACS_peak_8	819.79	0	0	0	0	0	0
chr1	19960323	19960466	MACS_peak_9	52.32	0	0	0	0	0	0
chr1	26947345	26947543	MACS_peak_10	119.77	1	chr1	26945287	26949548	3100	MACS_peak_717
chr1	27013344	27013479	MACS_peak_11	69.09	0	0	0	0	0	0
chr1	27013491	27013674	MACS_peak_12	93.34	0	0	0	0	0	0
chr1	27018671	27019181	MACS_peak_13	441.32	1	chr1	27017629	27030290	3100	MACS_peak_719
chr1	27019407	27019856	MACS_peak_14	262.51	1	chr1	27017629	27030290	3100	MACS_peak_719
chr1	27021864	27022290	MACS_peak_15	383.31	1	chr1	27017629	27030290	3100	MACS_peak_719
chr1	27668322	27668614	MACS_peak_16	252.3	1	chr1	27666924	27671427	3100	MACS_peak_742
chr1	27675849	27676136	MACS_peak_17	228.69	1	chr1	27674548	27677594	3100	MACS_peak_743
chr1	28122635	28122783	MACS_peak_18	54.49	0	0	0	0	0	0
chr1	28879301	28879585	MACS_peak_19	286.54	1	chr1	28878081	28881725	3100	MACS_peak_794
chr1	30286536	30286681	MACS_peak_20	60.95	0	0	0	0	0	0
chr1	33264816	33264945	MACS_peak_21	55.89	0	0	0	0	0	0
chr1	33921445	33921648	MACS_peak_22	71.98	0	0	0	0	0	0
chr1	38114912	38115057	MACS_peak_23	55.2	0	0	0	0	0	0
chr1	43425030	43425179	MACS_peak_24	94.15	1	chr1	43414223	43426835	3100	MACS_peak_1107
chr1	46859823	46860021	MACS_peak_25	146	1	chr1	46858821	46862152	3100	MACS_peak_1201
chr1	46867866	46868081	MACS_peak_26	202.81	1	chr1	46866645	46868745	249.78	MACS_peak_1202
chr1	46868085	46868190	MACS_peak_27	66.6	1	chr1	46866645	46868745	249.78	MACS_peak_1202
chr1	51985084	51985605	MACS_peak_28	413.53	1	chr1	51981494	51986256	3100	MACS_peak_1255
chr1	56127876	56128026	MACS_peak_29	63.39	0	0	0	0	0	0
chr1	58380376	58380492	MACS_peak_30	59.61	0	0	0	0	0	0
chr1	70476890	70477037	MACS_peak_31	54.58	0	0	0	0	0	0
chr1	74741742	74741888	MACS_peak_32	52.38	0	0	0	0	0	0
chr1	75271802	75271945	MACS_peak_33	55.54	0	0	0	0	0	0
chr1	77804143	77804261	MACS_peak_34	59	0	0	0	0	0	0
chr1	79515608	79515774	MACS_peak_35	56.36	0	0	0	0	0	0
chr1	80064535	80064642	MACS_peak_36	51.33	0	0	0	0	0	0
chr1	82266969	82267199	MACS_peak_37	104.73	1	chr1	82264343	82270907	3100	MACS_peak_1615
chr1	83717520	83717661	MACS_peak_38	65.8	0	0	0	0	0	0
chr1	84753117	84753342	MACS_peak_39	217.41	0	0	0	0	0	0
chr1	88456881	88456992	MACS_peak_40	57.45	0	0	0	0	0	0
chr1	89487416	89487571	MACS_peak_41	68.56	1	chr1	89485810	89490087	3100	MACS_peak_1721
chr1	93297385	93297528	MACS_peak_42	55.68	1	chr1	93296197	93302366	3100	MACS_peak_1776
chr1	93989946	93990078	MACS_peak_43	51.8	0	0	0	0	0	0
chr1	94159730	94159877	MACS_peak_44	58.34	1	chr1	94156977	94161237	864.81	MACS_peak_1802
chr1	94298939	94299219	MACS_peak_45	173.44	0	0	0	0	0	0
chr1	105467213	105467346	MACS_peak_46	56.57	0	0	0	0	0	0
chr1	142787949	142788087	MACS_peak_47	52.22	0	0	0	0	0	0
chr1	144019188	144019505	MACS_peak_48	51.33	0	0	0	0	0	0
chr1	147011951	147012156	MACS_peak_49	73.24	1	chr1	147009690	147016127	3100	MACS_peak_2187
chr1	147012731	147013030	MACS_peak_50	141.32	1	chr1	147009690	147016127	3100	MACS_peak_2187
chr1	149283266	149283393	MACS_peak_51	56.04	0	0	0	0	0	0
chr1	149911361	149911553	MACS_peak_52	140.72	1	chr1	149906449	149913093	3100	MACS_peak_2211
chr1	154355188	154355339	MACS_peak_53	58.54	0	0	0	0	0	0
chr1	154457809	154457945	MACS_peak_54	50.78	0	0	0	0	0	0
chr1	154973179	154973689	MACS_peak_55	343.21	1	chr1	154970646	154980795	3100	MACS_peak_2338
chr1	155145738	155145875	MACS_peak_56	52.18	1	chr1	155143602	155148660	3100	MACS_peak_2351
chr1	155214400	155214851	MACS_peak_57	736.12	1	chr1	155212073	155215894	3100	MACS_peak_2357
chr1	156056086	156056287	MACS_peak_58	63.37	0	0	0	0	0	0
chr1	156391459	156391670	MACS_peak_59	75.96	1	chr1	156387801	156393436	3100	MACS_peak_2400
chr1	156988563	156988765	MACS_peak_60	51.08	0	0	0	0	0	0
chr1	159693090	159693284	MACS_peak_61	108.3	0	0	0	0	0	0
chr1	160001703	160002001	MACS_peak_62	175.1	1	chr1	159998790	160004002	3100	MACS_peak_2457
chr1	161067193	161067674	MACS_peak_63	223.35	1	chr1	161066520	161069955	3100	MACS_peak_2480
chr1	161706238	161706443	MACS_peak_64	59.15	1	chr1	161704968	161707726	267.65	MACS_peak_2509
chr1	162613617	162613743	MACS_peak_65	55.64	0	0	0	0	0	0
chr1	162985205	162985334	MACS_peak_66	52.67	0	0	0	0	0	0
chr1	163431434	163431579	MACS_peak_67	53.01	0	0	0	0	0	0
chr1	165318595	165318739	MACS_peak_68	54.88	0	0	0	0	0	0
chr1	171523179	171523328	MACS_peak_69	54.25	0	0	0	0	0	0
chr1	172589918	172590045	MACS_peak_70	54.19	0	0	0	0	0	0
chr1	173287496	173287654	MACS_peak_71	71.4	0	0	0	0	0	0
chr1	176536303	176536452	MACS_peak_72	50.17	1	chr1	176535017	176537380	814.41	MACS_peak_2712
chr1	176921450	176921573	MACS_peak_73	56.4	0	0	0	0	0	0
chr1	177395307	177395446	MACS_peak_74	60.09	0	0	0	0	0	0
chr1	178870642	178870789	MACS_peak_75	51.76	0	0	0	0	0	0
chr1	180992233	180992465	MACS_peak_76	84.03	1	chr1	180988801	180993601	3100	MACS_peak_2782
chr1	182951796	182951949	MACS_peak_77	52.67	0	0	0	0	0	0
chr1	183265924	183266028	MACS_peak_78	56.72	0	0	0	0	0	0
chr1	183590353	183590500	MACS_peak_79	53.34	0	0	0	0	0	0
chr1	184752995	184753137	MACS_peak_80	61.34	0	0	0	0	0	0
chr1	185547671	185547800	MACS_peak_81	52.24	0	0	0	0	0	0
chr1	190069125	190069289	MACS_peak_82	56.86	0	0	0	0	0	0
chr1	190299394	190299519	MACS_peak_83	51.33	0	0	0	0	0	0
chr1	190394879	190395039	MACS_peak_84	63.97	0	0	0	0	0	0
chr1	191015472	191015615	MACS_peak_85	56.69	0	0	0	0	0	0
chr1	195972069	195972195	MACS_peak_86	60.11	1	chr1	195971691	195973532	88.38	MACS_peak_2946
chr1	197170561	197170776	MACS_peak_87	78.38	1	chr1	197165540	197172754	3100	MACS_peak_2960
chr1	200119039	200119168	MACS_peak_88	57.88	1	chr1	200118925	200121282	51.85	MACS_peak_2996
chr1	200639128	200639399	MACS_peak_89	199.91	1	chr1	200636748	200641680	3100	MACS_peak_3011
chr1	207997196	207997553	MACS_peak_90	290.01	1	chr1	207994178	207998527	3100	MACS_peak_3187
chr1	220263130	220263371	MACS_peak_91	168.93	1	chr1	220261853	220264838	3100	MACS_peak_3345
chr1	220267273	220267509	MACS_peak_92	240.38	1	chr1	220266053	220270148	3100	MACS_peak_3346
chr1	223893791	223893963	MACS_peak_93	91.63	1	chr1	223893141	223897047	1070.2	MACS_peak_3404
chr1	225177706	225177855	MACS_peak_94	52.47	0	0	0	0	0	0
chr1	227688339	227688459	MACS_peak_95	61.84	0	0	0	0	0	0
chr1	229539929	229540056	MACS_peak_96	59.83	0	0	0	0	0	0
chr1	233294364	233294505	MACS_peak_97	56.17	0	0	0	0	0	0
chr1	238006143	238006290	MACS_peak_98	54.72	0	0	0	0	0	0
chr1	242650713	242650845	MACS_peak_99	55.09	0	0	0	0	0	0
chr10	38358677	38358848	MACS_peak_100	97.3	0	0	0	0	0	0
chr10	52384299	52384496	MACS_peak_101	152.92	1	chr10	52380504	52386869	3100	MACS_peak_4316
chr10	60028590	60028842	MACS_peak_102	121.84	1	chr10	60023553	60031313	3100	MACS_peak_4356
chr10	89622046	89622355	MACS_peak_103	156.3	1	chr10	89620593	89629581	3100	MACS_peak_4704
chr10	95198529	95198718	MACS_peak_104	86.78	1	chr10	95197887	95199983	157.73	MACS_peak_4793
chr10	99599931	99600113	MACS_peak_105	56.96	1	chr10	99598840	99601390	1077.42	MACS_peak_4870
chr11	14913201	14913418	MACS_peak_106	84.26	1	chr11	14911014	14915168	3100	MACS_peak_5611
chr11	19454021	19454402	MACS_peak_107	445.83	1	chr11	19453224	19455150	86.72	MACS_peak_5661
chr11	55787407	55787552	MACS_peak_108	53.31	0	0	0	0	0	0
chr11	55796013	55796162	MACS_peak_109	52.08	0	0	0	0	0	0
chr11	56300768	56300885	MACS_peak_110	52.32	0	0	0	0	0	0
chr11	58481556	58481710	MACS_peak_111	54.63	0	0	0	0	0	0
chr11	59095308	59095454	MACS_peak_112	50.49	0	0	0	0	0	0
chr11	61348872	61349195	MACS_peak_113	608.48	1	chr11	61346280	61350148	3100	MACS_peak_5997
chr11	61604327	61604475	MACS_peak_114	51.15	0	0	0	0	0	0
chr11	67113600	67114046	MACS_peak_115	217.61	1	chr11	67112282	67114891	88.11	MACS_peak_6254
chr11	69252210	69252416	MACS_peak_116	74.03	1	chr11	69250994	69253075	59.27	MACS_peak_6332
chr11	71752780	71752976	MACS_peak_117	100.48	1	chr11	71748922	71754443	3100	MACS_peak_6373
chr11	76847484	76847617	MACS_peak_118	56.81	0	0	0	0	0	0
chr11	77705967	77706176	MACS_peak_119	130.12	1	chr11	77703283	77707427	3100	MACS_peak_6522
chr11	80327588	80327734	MACS_peak_120	53.17	0	0	0	0	0	0
chr11	83910275	83910400	MACS_peak_121	56.6	0	0	0	0	0	0
chr11	87093987	87094149	MACS_peak_122	60.71	0	0	0	0	0	0
chr11	87207416	87207558	MACS_peak_123	54.95	0	0	0	0	0	0
chr11	88754105	88754230	MACS_peak_124	59.4	0	0	0	0	0	0
chr11	97380394	97380526	MACS_peak_125	60.51	0	0	0	0	0	0
chr11	99857592	99857722	MACS_peak_126	52.32	0	0	0	0	0	0
chr11	103358381	103358486	MACS_peak_127	55.75	0	0	0	0	0	0
chr11	105873932	105874146	MACS_peak_128	66.06	0	0	0	0	0	0
chr11	109416051	109416200	MACS_peak_129	54.25	0	0	0	0	0	0
chr11	110585374	110585522	MACS_peak_130	59.73	0	0	0	0	0	0
chr11	111895657	111895789	MACS_peak_131	76.98	1	chr11	111893943	111897712	3100	MACS_peak_6911
chr11	112760084	112760226	MACS_peak_132	52.56	0	0	0	0	0	0
chr11	116911256	116911437	MACS_peak_133	52.85	0	0	0	0	0	0
chr11	122989383	122989647	MACS_peak_134	260.43	1	chr11	122988501	122990296	151.74	MACS_peak_7060
chr11	128146229	128146330	MACS_peak_135	57.74	0	0	0	0	0	0
chr11	131873729	131873876	MACS_peak_136	54.72	0	0	0	0	0	0
chr11	134177268	134177395	MACS_peak_137	66.98	0	0	0	0	0	0
chr12	7034844	7034991	MACS_peak_138	54.72	1	chr12	7034011	7036226	285.92	MACS_peak_7315
chr12	7035007	7035208	MACS_peak_139	98.26	1	chr12	7034011	7036226	285.92	MACS_peak_7315
chr12	14410620	14411016	MACS_peak_140	954.32	1	chr12	14408016	14410504	191.95	MACS_peak_7435
chr12	14537846	14538042	MACS_peak_141	164.73	1	chr12	14536339	14540859	1092.17	MACS_peak_7441
chr12	14547510	14547710	MACS_peak_142	88.69	1	chr12	14545918	14549190	577.89	MACS_peak_7442
chr12	23828693	23829076	MACS_peak_143	60.87	0	0	0	0	0	0
chr12	30225951	30226110	MACS_peak_144	61.14	0	0	0	0	0	0
chr12	40263043	40263176	MACS_peak_145	52.96	0	0	0	0	0	0
chr12	40417957	40418086	MACS_peak_146	52.24	0	0	0	0	0	0
chr12	41191005	41191143	MACS_peak_147	54.32	0	0	0	0	0	0
chr12	45293653	45293794	MACS_peak_148	56.17	0	0	0	0	0	0
chr12	46519544	46519704	MACS_peak_149	57.17	1	chr12	46517914	46520405	191.27	MACS_peak_7758
chr12	48084158	48084329	MACS_peak_150	56.82	0	0	0	0	0	0
chr12	53155125	53155285	MACS_peak_151	86.07	0	0	0	0	0	0
chr12	53297209	53297395	MACS_peak_152	69.09	1	chr12	53292490	53303417	3100	MACS_peak_7930
chr12	57047678	57047835	MACS_peak_153	96.04	0	0	0	0	0	0
chr12	57276277	57276535	MACS_peak_154	125.06	0	0	0	0	0	0
chr12	57853231	57853402	MACS_peak_155	69.09	1	chr12	57851706	57857666	3100	MACS_peak_8070
chr12	57853414	57853628	MACS_peak_156	166.85	1	chr12	57851706	57857666	3100	MACS_peak_8070
chr12	57856118	57856422	MACS_peak_157	189.03	1	chr12	57851706	57857666	3100	MACS_peak_8070
chr12	59769799	59769935	MACS_peak_158	54.05	0	0	0	0	0	0
chr12	62653951	62654137	MACS_peak_159	124	1	chr12	62651772	62658075	3100	MACS_peak_8122
chr12	71201851	71201979	MACS_peak_160	75.83	0	0	0	0	0	0
chr12	71828998	71829141	MACS_peak_161	65.25	0	0	0	0	0	0
chr12	73521782	73521934	MACS_peak_162	51.55	0	0	0	0	0	0
chr12	75724037	75724286	MACS_peak_163	394.86	1	chr12	75722483	75725343	3100	MACS_peak_8311
chr12	75724310	75724470	MACS_peak_164	62.53	1	chr12	75722483	75725343	3100	MACS_peak_8311
chr12	75851783	75852027	MACS_peak_165	178.42	0	0	0	0	0	0
chr12	91775929	91776021	MACS_peak_166	60.77	1	chr12	91774378	91776837	2621.87	MACS_peak_8472
chr12	102888053	102888206	MACS_peak_167	62.62	0	0	0	0	0	0
chr12	110547237	110547417	MACS_peak_168	109.21	1	chr12	110545585	110548739	1289.9	MACS_peak_8745
chr12	114418474	114418619	MACS_peak_169	51.85	0	0	0	0	0	0
chr12	116872068	116872214	MACS_peak_170	54.96	1	chr12	116870981	116873492	403.48	MACS_peak_8832
chr12	125401705	125401961	MACS_peak_171	188.95	1	chr12	125397334	125406045	3100	MACS_peak_9045
chr12	131632152	131632292	MACS_peak_172	56.42	0	0	0	0	0	0
chr13	20278415	20278540	MACS_peak_173	56.98	0	0	0	0	0	0
chr13	27617313	27617499	MACS_peak_174	96.04	1	chr13	27616527	27618518	98.8	MACS_peak_9245
chr13	28051117	28051252	MACS_peak_175	57.69	1	chr13	28050730	28052839	178.43	MACS_peak_9261
chr13	41749739	41749991	MACS_peak_176	143.61	0	0	0	0	0	0
chr13	59523871	59524025	MACS_peak_177	62.37	0	0	0	0	0	0
chr13	67334903	67335075	MACS_peak_178	76.86	0	0	0	0	0	0
chr13	67804540	67804793	MACS_peak_179	140.17	1	chr13	67801699	67807106	3100	MACS_peak_9666
chr13	69617060	69617205	MACS_peak_180	55.2	0	0	0	0	0	0
chr13	74244188	74244324	MACS_peak_181	57.43	0	0	0	0	0	0
chr13	74321519	74321661	MACS_peak_182	52.56	0	0	0	0	0	0
chr13	77901250	77901488	MACS_peak_183	215.64	1	chr13	77896965	77905888	3100	MACS_peak_9760
chr13	77903258	77903510	MACS_peak_184	186.77	1	chr13	77896965	77905888	3100	MACS_peak_9760
chr13	78271708	78271902	MACS_peak_185	71.27	1	chr13	78269256	78275179	3100	MACS_peak_9769
chr13	78918811	78918958	MACS_peak_186	51.38	0	0	0	0	0	0
chr13	96680751	96680913	MACS_peak_187	68.16	0	0	0	0	0	0
chr13	96760424	96760559	MACS_peak_188	57.69	0	0	0	0	0	0
chr13	97603599	97603758	MACS_peak_189	62.81	0	0	0	0	0	0
chr13	98085395	98085726	MACS_peak_190	225.42	1	chr13	98083099	98090203	3100	MACS_peak_9941
chr13	100150941	100151173	MACS_peak_191	130.91	1	chr13	100149728	100159482	3100	MACS_peak_9976
chr13	100153432	100153740	MACS_peak_192	263.28	1	chr13	100149728	100159482	3100	MACS_peak_9976
chr13	114150336	114150479	MACS_peak_193	55.68	1	chr13	114141886	114152185	3100	MACS_peak_10160
chr14	19814544	19814690	MACS_peak_194	54.96	0	0	0	0	0	0
chr14	20586927	20587052	MACS_peak_195	57.24	0	0	0	0	0	0
chr14	20587074	20587240	MACS_peak_196	81.69	0	0	0	0	0	0
chr14	22665281	22665429	MACS_peak_197	52.54	0	0	0	0	0	0
chr14	22812726	22812911	MACS_peak_198	77.63	0	0	0	0	0	0
chr14	24836119	24836256	MACS_peak_199	125.34	1	chr14	24833532	24839523	3100	MACS_peak_10311
chr14	24836283	24836951	MACS_peak_200	709.73	1	chr14	24833532	24839523	3100	MACS_peak_10311
chr14	27425903	27426027	MACS_peak_201	52.63	0	0	0	0	0	0
chr14	33407560	33407796	MACS_peak_202	95.14	1	chr14	33406517	33412277	3100	MACS_peak_10402
chr14	33537197	33537324	MACS_peak_203	55.02	0	0	0	0	0	0
chr14	37223011	37223154	MACS_peak_204	62.16	0	0	0	0	0	0
chr14	37777600	37777751	MACS_peak_205	50.44	0	0	0	0	0	0
chr14	41044849	41044976	MACS_peak_206	50.78	0	0	0	0	0	0
chr14	42319907	42320053	MACS_peak_207	53.74	0	0	0	0	0	0
chr14	45545827	45546005	MACS_peak_208	57.79	0	0	0	0	0	0
chr14	45751014	45751233	MACS_peak_209	83.08	0	0	0	0	0	0
chr14	47651524	47651671	MACS_peak_210	65.98	0	0	0	0	0	0
chr14	49822515	49822656	MACS_peak_211	56.17	0	0	0	0	0	0
chr14	55581172	55581344	MACS_peak_212	52.67	0	0	0	0	0	0
chr14	65757411	65757543	MACS_peak_213	51.11	0	0	0	0	0	0
chr14	65864296	65864426	MACS_peak_214	55.75	0	0	0	0	0	0
chr14	65912972	65913081	MACS_peak_215	82.86	0	0	0	0	0	0
chr14	67094718	67094865	MACS_peak_216	53.28	0	0	0	0	0	0
chr14	68283332	68283532	MACS_peak_217	68.23	1	chr14	68280756	68285090	3100	MACS_peak_10876
chr14	73568539	73568650	MACS_peak_218	51.15	0	0	0	0	0	0
chr14	75232187	75232332	MACS_peak_219	51.85	1	chr14	75228325	75234141	3100	MACS_peak_10997
chr14	75886142	75886321	MACS_peak_220	74.01	0	0	0	0	0	0
chr14	76726524	76726665	MACS_peak_221	51.32	0	0	0	0	0	0
chr14	80383748	80383927	MACS_peak_222	57.55	0	0	0	0	0	0
chr14	86818030	86818195	MACS_peak_223	52.04	0	0	0	0	0	0
chr14	88253033	88253167	MACS_peak_224	53.01	0	0	0	0	0	0
chr14	98734946	98735112	MACS_peak_225	60.89	0	0	0	0	0	0
chr14	101458006	101458136	MACS_peak_226	55.23	0	0	0	0	0	0
chr14	104454173	104454343	MACS_peak_227	63.72	0	0	0	0	0	0
chr15	25601178	25601302	MACS_peak_228	50.56	0	0	0	0	0	0
chr15	26440603	26440722	MACS_peak_229	52.05	0	0	0	0	0	0
chr15	27429014	27429193	MACS_peak_230	89.44	0	0	0	0	0	0
chr15	29886072	29886202	MACS_peak_231	55.62	0	0	0	0	0	0
chr15	31477764	31477900	MACS_peak_232	57.43	0	0	0	0	0	0
chr15	35135477	35135590	MACS_peak_233	74.56	0	0	0	0	0	0
chr15	44580043	44580704	MACS_peak_234	533.46	1	chr15	44578488	44584838	3100	MACS_peak_11732
chr15	44580748	44580932	MACS_peak_235	272.35	1	chr15	44578488	44584838	3100	MACS_peak_11732
chr15	45500414	45500574	MACS_peak_236	58.03	0	0	0	0	0	0
chr15	46389376	46389522	MACS_peak_237	54.96	0	0	0	0	0	0
chr15	46706797	46707002	MACS_peak_238	55.74	0	0	0	0	0	0
chr15	53559734	53559878	MACS_peak_239	54.46	0	0	0	0	0	0
chr15	55033818	55033960	MACS_peak_240	57.71	0	0	0	0	0	0
chr15	56276714	56276863	MACS_peak_241	52.29	0	0	0	0	0	0
chr15	57025736	57025912	MACS_peak_242	71.29	1	chr15	57021732	57027302	3100	MACS_peak_11885
chr15	58483569	58483698	MACS_peak_243	55.89	0	0	0	0	0	0
chr15	58759327	58759705	MACS_peak_244	277.31	1	chr15	58758136	58761355	1555.2	MACS_peak_11909
chr15	58759883	58760152	MACS_peak_245	151.83	1	chr15	58758136	58761355	1555.2	MACS_peak_11909
chr15	60006732	60006879	MACS_peak_246	51.38	0	0	0	0	0	0
chr15	60691148	60691352	MACS_peak_247	113.53	1	chr15	60677416	60692689	3100	MACS_peak_11951
chr15	61991448	61991587	MACS_peak_248	53.3	0	0	0	0	0	0
chr15	62434692	62434839	MACS_peak_249	54.72	0	0	0	0	0	0
chr15	63795474	63795767	MACS_peak_250	226.19	1	chr15	63792083	63800661	3100	MACS_peak_11994
chr15	63796627	63796939	MACS_peak_251	200.14	1	chr15	63792083	63800661	3100	MACS_peak_11994
chr15	64752293	64752438	MACS_peak_252	82.67	1	chr15	64751211	64755628	3100	MACS_peak_12017
chr15	64752472	64752839	MACS_peak_253	438.93	1	chr15	64751211	64755628	3100	MACS_peak_12017
chr15	65809983	65810134	MACS_peak_254	51.8	1	chr15	65807491	65811217	3100	MACS_peak_12042
chr15	68132382	68132674	MACS_peak_255	673.27	1	chr15	68130065	68134639	3100	MACS_peak_12091
chr15	69478949	69479074	MACS_peak_256	56.26	0	0	0	0	0	0
chr15	70393957	70394423	MACS_peak_257	349.65	1	chr15	70383306	70395124	3100	MACS_peak_12134
chr15	70403526	70403954	MACS_peak_258	278.57	1	chr15	70403050	70405096	158.74	MACS_peak_12135
chr15	75016150	75016834	MACS_peak_259	564.56	1	chr15	75016980	75020189	3100	MACS_peak_12224
chr15	75016846	75017003	MACS_peak_260	81.15	1	chr15	75016980	75020189	3100	MACS_peak_12224
chr15	75017682	75017829	MACS_peak_261	54.72	1	chr15	75016980	75020189	3100	MACS_peak_12224
chr15	76520193	76520331	MACS_peak_262	62.01	0	0	0	0	0	0
chr15	81524646	81524780	MACS_peak_263	53.06	0	0	0	0	0	0
chr15	85523559	85523945	MACS_peak_264	132.15	1	chr15	85522503	85528295	3100	MACS_peak_12392
chr15	85524466	85524727	MACS_peak_265	243.83	1	chr15	85522503	85528295	3100	MACS_peak_12392
chr15	92018740	92018879	MACS_peak_266	53.3	0	0	0	0	0	0
chr15	92527804	92527952	MACS_peak_267	62.82	0	0	0	0	0	0
chr15	93117311	93117455	MACS_peak_268	52.08	0	0	0	0	0	0
chr15	94751573	94751700	MACS_peak_269	59.83	1	chr15	94747239	94751458	2198.88	MACS_peak_12542
chr15	98164866	98165023	MACS_peak_270	55.08	0	0	0	0	0	0
chr15	99396464	99396750	MACS_peak_271	156.71	1	chr15	99393199	99398623	3100	MACS_peak_12610
chr15	101286236	101286363	MACS_peak_272	65.29	0	0	0	0	0	0
chr16	2441259	2441402	MACS_peak_273	55.68	0	0	0	0	0	0
chr16	5238271	5238407	MACS_peak_274	57.43	0	0	0	0	0	0
chr16	8344008	8344153	MACS_peak_275	55.2	0	0	0	0	0	0
chr16	33901466	33901814	MACS_peak_276	52.59	0	0	0	0	0	0
chr16	33936719	33936834	MACS_peak_277	60.7	0	0	0	0	0	0
chr16	46421260	46421434	MACS_peak_278	54.32	0	0	0	0	0	0
chr16	49481458	49481611	MACS_peak_279	54.88	0	0	0	0	0	0
chr16	52026488	52026637	MACS_peak_280	57.03	0	0	0	0	0	0
chr16	52885241	52885429	MACS_peak_281	59.22	0	0	0	0	0	0
chr16	53458120	53458269	MACS_peak_282	52.29	0	0	0	0	0	0
chr16	57840566	57840695	MACS_peak_283	59.28	1	chr16	57841150	57843608	753.4	MACS_peak_13478
chr16	60284920	60285047	MACS_peak_284	65.66	0	0	0	0	0	0
chr16	61601354	61601496	MACS_peak_285	55.36	0	0	0	0	0	0
chr16	61605532	61605669	MACS_peak_286	50.19	0	0	0	0	0	0
chr16	62975340	62975461	MACS_peak_287	58.12	0	0	0	0	0	0
chr16	64537148	64537292	MACS_peak_288	57.17	0	0	0	0	0	0
chr16	69603710	69603855	MACS_peak_289	54.22	1	chr16	69597558	69604522	3100	MACS_peak_13672
chr16	72779520	72779675	MACS_peak_290	52.67	0	0	0	0	0	0
chr16	74777668	74778220	MACS_peak_291	277.27	1	chr16	74776394	74779088	1399.97	MACS_peak_13758
chr16	76441018	76441118	MACS_peak_292	64.52	0	0	0	0	0	0
chr16	78133173	78133690	MACS_peak_293	430.39	1	chr16	78131951	78135761	3100	MACS_peak_13817
chr16	80804468	80804625	MACS_peak_294	66.5	0	0	0	0	0	0
chr16	83986363	83986587	MACS_peak_295	198.65	1	chr16	83985545	83989673	3100	MACS_peak_13895
chr16	87526738	87526951	MACS_peak_296	125.23	1	chr16	87521680	87528212	3100	MACS_peak_13997
chr17	2304775	2305029	MACS_peak_297	132.68	1	chr17	2301188	2306932	3100	MACS_peak_14188
chr17	6434413	6434562	MACS_peak_298	50.92	0	0	0	0	0	0
chr17	7620372	7620796	MACS_peak_299	360.75	1	chr17	7618722	7622319	3100	MACS_peak_14332
chr17	7740103	7740479	MACS_peak_300	333.74	1	chr17	7736050	7743615	3100	MACS_peak_14338
chr17	8286509	8286696	MACS_peak_301	59.46	1	chr17	8281241	8289170	3100	MACS_peak_14373
chr17	12669498	12669628	MACS_peak_302	59.01	0	0	0	0	0	0
chr17	26022211	26022389	MACS_peak_303	60.71	0	0	0	0	0	0
chr17	26022405	26022599	MACS_peak_304	111.7	0	0	0	0	0	0
chr17	26589225	26589399	MACS_peak_305	66.82	0	0	0	0	0	0
chr17	29034781	29034929	MACS_peak_306	63.91	1	chr17	29034001	29038749	2683.92	MACS_peak_14648
chr17	29034987	29035104	MACS_peak_307	130.86	1	chr17	29034001	29038749	2683.92	MACS_peak_14648
chr17	29035124	29035257	MACS_peak_308	89.05	1	chr17	29034001	29038749	2683.92	MACS_peak_14648
chr17	29035303	29035483	MACS_peak_309	183.95	1	chr17	29034001	29038749	2683.92	MACS_peak_14648
chr17	29035691	29036039	MACS_peak_310	441.04	1	chr17	29034001	29038749	2683.92	MACS_peak_14648
chr17	36754818	36755179	MACS_peak_311	629.06	0	0	0	0	0	0
chr17	38579453	38579681	MACS_peak_312	178.46	1	chr17	38578552	38580319	50.72	MACS_peak_14861
chr17	41535623	41535792	MACS_peak_313	114.36	0	0	0	0	0	0
chr17	56990173	56990323	MACS_peak_314	51.58	0	0	0	0	0	0
chr17	58160412	58160596	MACS_peak_315	56.99	0	0	0	0	0	0
chr17	59544849	59545208	MACS_peak_316	148.28	0	0	0	0	0	0
chr17	61919986	61920365	MACS_peak_317	812.03	1	chr17	61917030	61921952	3100	MACS_peak_15369
chr17	68342507	68342654	MACS_peak_318	56.4	0	0	0	0	0	0
chr17	70599066	70599279	MACS_peak_319	80.95	1	chr17	70596236	70602016	1402.18	MACS_peak_15541
chr17	76569036	76569200	MACS_peak_320	86.78	0	0	0	0	0	0
chr17	78129221	78129636	MACS_peak_321	246.59	0	0	0	0	0	0
chr17	78716507	78716674	MACS_peak_322	56.12	0	0	0	0	0	0
chr17	80712632	80713159	MACS_peak_323	235.01	1	chr17	80707650	80714562	3100	MACS_peak_15923
chr18	3297474	3297639	MACS_peak_324	55.15	1	chr18	3295535	3298439	3100	MACS_peak_16000
chr18	6627570	6627678	MACS_peak_325	61.13	0	0	0	0	0	0
chr18	14784003	14784144	MACS_peak_326	53.19	0	0	0	0	0	0
chr18	33077818	33078194	MACS_peak_327	186.29	1	chr18	33075609	33079016	3100	MACS_peak_16323
chr18	33709298	33709452	MACS_peak_328	62.37	1	chr18	33707147	33712493	3100	MACS_peak_16330
chr18	33709702	33709897	MACS_peak_329	315.74	1	chr18	33707147	33712493	3100	MACS_peak_16330
chr18	61034789	61035085	MACS_peak_330	433.22	1	chr18	61031627	61036828	3100	MACS_peak_16571
chr19	2463116	2463303	MACS_peak_331	112.95	1	chr19	2460635	2463927	2765.3	MACS_peak_16878
chr19	3721436	3721711	MACS_peak_332	379.36	1	chr19	3720771	3724054	3100	MACS_peak_16961
chr19	3722864	3723058	MACS_peak_333	90.35	1	chr19	3720771	3724054	3100	MACS_peak_16961
chr19	4581793	4581977	MACS_peak_334	73.72	1	chr19	4579778	4582597	2802.33	MACS_peak_17004
chr19	4584255	4584417	MACS_peak_335	60.41	1	chr19	4583212	4585967	3100	MACS_peak_17005
chr19	7294317	7294474	MACS_peak_336	102.06	1	chr19	7292534	7296062	3100	MACS_peak_17103
chr19	12947092	12947417	MACS_peak_337	246.8	1	chr19	12942651	12948170	3100	MACS_peak_17351
chr19	14317637	14317933	MACS_peak_338	191.95	1	chr19	14315028	14318827	1183.43	MACS_peak_17421
chr19	14317980	14318347	MACS_peak_339	453.82	1	chr19	14315028	14318827	1183.43	MACS_peak_17421
chr19	14318391	14318670	MACS_peak_340	220.7	1	chr19	14315028	14318827	1183.43	MACS_peak_17421
chr19	15306884	15307082	MACS_peak_341	109.32	1	chr19	15304965	15308197	2198.73	MACS_peak_17448
chr19	21412878	21413038	MACS_peak_342	70.39	0	0	0	0	0	0
chr19	23531699	23531859	MACS_peak_343	80.26	0	0	0	0	0	0
chr19	27814246	27814394	MACS_peak_344	52.67	0	0	0	0	0	0
chr19	35456444	35456575	MACS_peak_345	58.74	1	chr19	35452357	35456366	3100	MACS_peak_17767
chr19	35739016	35739175	MACS_peak_346	170.32	1	chr19	35737156	35742341	3100	MACS_peak_17783
chr19	35739205	35739357	MACS_peak_347	114.91	1	chr19	35737156	35742341	3100	MACS_peak_17783
chr19	37464333	37464481	MACS_peak_348	54.49	1	chr19	37462454	37466163	3100	MACS_peak_17846
chr19	46149347	46149613	MACS_peak_349	170.52	1	chr19	46147722	46150660	3100	MACS_peak_18185
chr19	49256113	49256399	MACS_peak_350	274.41	1	chr19	49253772	49257693	3100	MACS_peak_18348
chr19	55689955	55690130	MACS_peak_351	57.46	1	chr19	55689334	55692583	3100	MACS_peak_18611
chr19	55690159	55690352	MACS_peak_352	407.82	1	chr19	55689334	55692583	3100	MACS_peak_18611
chr19	55727799	55728135	MACS_peak_353	762.39	1	chr19	55727173	55729989	2560.97	MACS_peak_18615
chr19	55770518	55770935	MACS_peak_354	336.85	1	chr19	55765484	55772078	3100	MACS_peak_18618
chr2	4145779	4145915	MACS_peak_355	54.05	0	0	0	0	0	0
chr2	6768813	6768940	MACS_peak_356	53.48	0	0	0	0	0	0
chr2	7828965	7829107	MACS_peak_357	55.92	0	0	0	0	0	0
chr2	9563536	9563694	MACS_peak_358	54.43	1	chr2	9560630	9566222	3100	MACS_peak_18870
chr2	11606159	11606570	MACS_peak_359	572.07	1	chr2	11602052	11608258	3100	MACS_peak_18946
chr2	12468941	12469058	MACS_peak_360	52.32	0	0	0	0	0	0
chr2	13719487	13719632	MACS_peak_361	50.72	0	0	0	0	0	0
chr2	17484839	17485049	MACS_peak_362	81.75	0	0	0	0	0	0
chr2	21968083	21968207	MACS_peak_363	60.68	0	0	0	0	0	0
chr2	32008619	32008829	MACS_peak_364	76.27	0	0	0	0	0	0
chr2	32235860	32236209	MACS_peak_365	229.32	1	chr2	32231747	32237852	3100	MACS_peak_19235
chr2	33870100	33870279	MACS_peak_366	53.3	0	0	0	0	0	0
chr2	35315521	35315668	MACS_peak_367	50.26	0	0	0	0	0	0
chr2	37899361	37899503	MACS_peak_368	107.69	1	chr2	37890930	37901423	3100	MACS_peak_19305
chr2	37899813	37900055	MACS_peak_369	181.1	1	chr2	37890930	37901423	3100	MACS_peak_19305
chr2	43273915	43274053	MACS_peak_370	56.92	0	0	0	0	0	0
chr2	46870134	46870324	MACS_peak_371	137.98	0	0	0	0	0	0
chr2	47338106	47338269	MACS_peak_372	61.05	0	0	0	0	0	0
chr2	49650503	49650674	MACS_peak_373	51.85	0	0	0	0	0	0
chr2	53614796	53614913	MACS_peak_374	65.18	0	0	0	0	0	0
chr2	53821630	53821773	MACS_peak_375	55.68	1	chr2	53820343	53823063	779.07	MACS_peak_19544
chr2	56450626	56450761	MACS_peak_376	52.08	0	0	0	0	0	0
chr2	56704474	56704606	MACS_peak_377	55.47	0	0	0	0	0	0
chr2	57859034	57859147	MACS_peak_378	50.54	0	0	0	0	0	0
chr2	59056580	59056691	MACS_peak_379	57.45	0	0	0	0	0	0
chr2	65536973	65537121	MACS_peak_380	50.4	0	0	0	0	0	0
chr2	65659720	65660009	MACS_peak_381	162.42	1	chr2	65656000	65661656	3100	MACS_peak_19717
chr2	65662839	65663109	MACS_peak_382	120.83	1	chr2	65661346	65665501	3100	MACS_peak_19718
chr2	67180721	67180879	MACS_peak_383	58.39	0	0	0	0	0	0
chr2	68496294	68496508	MACS_peak_384	64.76	0	0	0	0	0	0
chr2	70550557	70550715	MACS_peak_385	57.65	0	0	0	0	0	0
chr2	73143288	73143548	MACS_peak_386	215.05	1	chr2	73141722	73146026	3100	MACS_peak_19846
chr2	73144283	73144421	MACS_peak_387	56.36	1	chr2	73141722	73146026	3100	MACS_peak_19846
chr2	73144427	73144647	MACS_peak_388	312.25	1	chr2	73141722	73146026	3100	MACS_peak_19846
chr2	79911650	79911799	MACS_peak_389	54.11	0	0	0	0	0	0
chr2	80195893	80196037	MACS_peak_390	52.08	0	0	0	0	0	0
chr2	82560279	82560423	MACS_peak_391	53.57	0	0	0	0	0	0
chr2	83182430	83182530	MACS_peak_392	59.4	0	0	0	0	0	0
chr2	86657511	86657664	MACS_peak_393	53.4	0	0	0	0	0	0
chr2	87897754	87897837	MACS_peak_394	79.47	0	0	0	0	0	0
chr2	95480335	95480445	MACS_peak_395	64.94	0	0	0	0	0	0
chr2	96625164	96625323	MACS_peak_396	61.14	0	0	0	0	0	0
chr2	96917471	96917755	MACS_peak_397	699.91	1	chr2	96916630	96918354	73.97	MACS_peak_20070
chr2	97304000	97304265	MACS_peak_398	422.7	1	chr2	97301081	97305613	3100	MACS_peak_20085
chr2	97304296	97304416	MACS_peak_399	58.41	1	chr2	97301081	97305613	3100	MACS_peak_20085
chr2	99030682	99030914	MACS_peak_400	93.94	1	chr2	99028464	99030301	91.37	MACS_peak_20119
chr2	99052217	99052352	MACS_peak_401	61.31	0	0	0	0	0	0
chr2	99690156	99690312	MACS_peak_402	56.08	0	0	0	0	0	0
chr2	99822034	99822239	MACS_peak_403	178.88	0	0	0	0	0	0
chr2	110883930	110884084	MACS_peak_404	57.79	0	0	0	0	0	0
chr2	112463295	112463440	MACS_peak_405	56.91	1	chr2	112460937	112464827	293.81	MACS_peak_20248
chr2	114647306	114647506	MACS_peak_406	115.34	1	chr2	114643037	114654303	3100	MACS_peak_20303
chr2	115479232	115479379	MACS_peak_407	54.72	0	0	0	0	0	0
chr2	116506151	116506309	MACS_peak_408	56.82	0	0	0	0	0	0
chr2	117073402	117073592	MACS_peak_409	77.79	0	0	0	0	0	0
chr2	120550697	120550832	MACS_peak_410	52.67	0	0	0	0	0	0
chr2	124267885	124268003	MACS_peak_411	58.62	0	0	0	0	0	0
chr2	125419749	125419883	MACS_peak_412	57.95	0	0	0	0	0	0
chr2	133513506	133513642	MACS_peak_413	56.87	0	0	0	0	0	0
chr2	136256289	136256436	MACS_peak_414	55.27	0	0	0	0	0	0
chr2	139183732	139183891	MACS_peak_415	52.67	0	0	0	0	0	0
chr2	140971282	140971393	MACS_peak_416	55.1	0	0	0	0	0	0
chr2	145410066	145410215	MACS_peak_417	55.88	0	0	0	0	0	0
chr2	147029114	147029293	MACS_peak_418	53.66	0	0	0	0	0	0
chr2	147727372	147727517	MACS_peak_419	55.79	0	0	0	0	0	0
chr2	147880323	147880448	MACS_peak_420	72.3	0	0	0	0	0	0
chr2	156003682	156003833	MACS_peak_421	59.39	0	0	0	0	0	0
chr2	157500482	157500631	MACS_peak_422	50.54	0	0	0	0	0	0
chr2	157651656	157651779	MACS_peak_423	51.88	0	0	0	0	0	0
chr2	160431971	160432100	MACS_peak_424	61.39	0	0	0	0	0	0
chr2	162430349	162430464	MACS_peak_425	52.6	0	0	0	0	0	0
chr2	162814965	162815100	MACS_peak_426	50.35	0	0	0	0	0	0
chr2	166826481	166826618	MACS_peak_427	57.17	0	0	0	0	0	0
chr2	167959069	167959206	MACS_peak_428	53.8	0	0	0	0	0	0
chr2	173390368	173390528	MACS_peak_429	69.09	0	0	0	0	0	0
chr2	178431228	178431372	MACS_peak_430	51.7	0	0	0	0	0	0
chr2	179717417	179717555	MACS_peak_431	50.28	0	0	0	0	0	0
chr2	181265337	181265469	MACS_peak_432	55.09	0	0	0	0	0	0
chr2	182801762	182801896	MACS_peak_433	51.28	0	0	0	0	0	0
chr2	183015033	183015212	MACS_peak_434	52.67	0	0	0	0	0	0
chr2	185653723	185653866	MACS_peak_435	57.44	0	0	0	0	0	0
chr2	192372114	192372243	MACS_peak_436	57.88	0	0	0	0	0	0
chr2	198944823	198944962	MACS_peak_437	54.9	0	0	0	0	0	0
chr2	202663125	202663304	MACS_peak_438	65.62	1	chr2	202661324	202664387	520.35	MACS_peak_21318
chr2	204046200	204046347	MACS_peak_439	73.34	0	0	0	0	0	0
chr2	209897335	209897467	MACS_peak_440	51.45	0	0	0	0	0	0
chr2	210646786	210646968	MACS_peak_441	70.39	0	0	0	0	0	0
chr2	221262318	221262472	MACS_peak_442	51.06	0	0	0	0	0	0
chr2	222002790	222002937	MACS_peak_443	50.63	0	0	0	0	0	0
chr2	222125113	222125261	MACS_peak_444	71.52	0	0	0	0	0	0
chr2	223262987	223263140	MACS_peak_445	60.71	0	0	0	0	0	0
chr2	226715383	226715531	MACS_peak_446	57.5	0	0	0	0	0	0
chr2	227201778	227201910	MACS_peak_447	61.68	0	0	0	0	0	0
chr2	231921230	231921363	MACS_peak_448	100.06	1	chr2	231920056	231924782	3100	MACS_peak_21764
chr2	232526847	232527137	MACS_peak_449	271.44	1	chr2	232525789	232528755	2364.62	MACS_peak_21785
chr2	232571620	232571767	MACS_peak_450	54.72	1	chr2	232569191	232578103	3100	MACS_peak_21790
chr2	236195883	236196023	MACS_peak_451	50.49	0	0	0	0	0	0
chr2	236575219	236575442	MACS_peak_452	156.63	1	chr2	236573589	236576085	891.04	MACS_peak_21885
chr2	236575460	236575602	MACS_peak_453	55.92	1	chr2	236573589	236576085	891.04	MACS_peak_21885
chr2	236578030	236578143	MACS_peak_454	71.37	1	chr2	236577005	236581484	3100	MACS_peak_21886
chr2	240936925	240937068	MACS_peak_455	52.32	0	0	0	0	0	0
chr20	1757966	1758109	MACS_peak_456	53.49	1	chr20	1756328	1759040	2095.79	MACS_peak_22073
chr20	7617661	7617779	MACS_peak_457	53.63	0	0	0	0	0	0
chr20	8540701	8540846	MACS_peak_458	51.85	0	0	0	0	0	0
chr20	10414715	10415039	MACS_peak_459	407.64	1	chr20	10411532	10418682	3100	MACS_peak_22228
chr20	10415095	10415382	MACS_peak_460	380.01	1	chr20	10411532	10418682	3100	MACS_peak_22228
chr20	16017123	16017280	MACS_peak_461	52.67	0	0	0	0	0	0
chr20	16554036	16554291	MACS_peak_462	157.03	1	chr20	16551629	16557861	3100	MACS_peak_22310
chr20	16555409	16555711	MACS_peak_463	188.69	1	chr20	16551629	16557861	3100	MACS_peak_22310
chr20	16788473	16788597	MACS_peak_464	50.34	0	0	0	0	0	0
chr20	20553455	20553626	MACS_peak_465	50.65	0	0	0	0	0	0
chr20	22431870	22432040	MACS_peak_466	57.59	0	0	0	0	0	0
chr20	22495107	22495235	MACS_peak_467	52.22	1	chr20	22492189	22494628	222.82	MACS_peak_22383
chr20	23742209	23742367	MACS_peak_468	58.39	0	0	0	0	0	0
chr20	25086886	25087030	MACS_peak_469	57.17	0	0	0	0	0	0
chr20	26223009	26223179	MACS_peak_470	60.71	0	0	0	0	0	0
chr20	29430890	29431038	MACS_peak_471	51.25	0	0	0	0	0	0
chr20	36771856	36772087	MACS_peak_472	62.15	1	chr20	36770850	36774136	268.95	MACS_peak_22608
chr20	38368511	38368657	MACS_peak_473	54.96	0	0	0	0	0	0
chr20	46907411	46907558	MACS_peak_474	54.72	0	0	0	0	0	0
chr20	48552640	48552906	MACS_peak_475	178.55	1	chr20	48551318	48556312	3100	MACS_peak_22798
chr20	49032283	49032499	MACS_peak_476	115.03	1	chr20	49030521	49033671	677.38	MACS_peak_22819
chr20	50994544	50994689	MACS_peak_477	60.95	0	0	0	0	0	0
chr20	57745100	57745243	MACS_peak_478	55.54	0	0	0	0	0	0
chr20	62313695	62313909	MACS_peak_479	142.46	1	chr20	62312582	62314456	63.49	MACS_peak_23082
chr21	10429811	10429963	MACS_peak_480	50.55	0	0	0	0	0	0
chr21	10643365	10643512	MACS_peak_481	51.38	0	0	0	0	0	0
chr21	10750013	10750333	MACS_peak_482	51.28	0	0	0	0	0	0
chr21	10818544	10818743	MACS_peak_483	64.84	0	0	0	0	0	0
chr21	25985044	25985188	MACS_peak_484	55.44	0	0	0	0	0	0
chr21	31305309	31305433	MACS_peak_485	70.87	0	0	0	0	0	0
chr21	32198830	32198975	MACS_peak_486	55.2	0	0	0	0	0	0
chr21	34144084	34144205	MACS_peak_487	71.37	1	chr21	34140128	34146375	3100	MACS_peak_23284
chr21	34144249	34144626	MACS_peak_488	275.56	1	chr21	34140128	34146375	3100	MACS_peak_23284
chr21	34293601	34293748	MACS_peak_489	54.72	0	0	0	0	0	0
chr21	40037754	40037896	MACS_peak_490	57.71	0	0	0	0	0	0
chr21	43299122	43299259	MACS_peak_491	57.17	1	chr21	43297029	43301005	3100	MACS_peak_23450
chr21	45145802	45145952	MACS_peak_492	63.39	1	chr21	45146048	45150526	2845.13	MACS_peak_23509
chr22	29426782	29427067	MACS_peak_493	146.07	1	chr22	29424991	29429560	3100	MACS_peak_23815
chr22	29427088	29427232	MACS_peak_494	57.17	1	chr22	29424991	29429560	3100	MACS_peak_23815
chr22	29427258	29427427	MACS_peak_495	96.04	1	chr22	29424991	29429560	3100	MACS_peak_23815
chr22	37724749	37725100	MACS_peak_496	269.85	0	0	0	0	0	0
chr22	38506232	38506378	MACS_peak_497	84.6	1	chr22	38505920	38508226	368.03	MACS_peak_24027
chr22	38852048	38852276	MACS_peak_498	141.23	1	chr22	38850800	38853176	3100	MACS_peak_24040
chr22	38857623	38857748	MACS_peak_499	92.04	1	chr22	38856506	38859098	774.28	MACS_peak_24041
chr22	39925179	39925528	MACS_peak_500	352.41	1	chr22	39924144	39926517	171.08	MACS_peak_24084
chr22	42840149	42840333	MACS_peak_501	113.98	1	chr22	42839166	42841896	1691.55	MACS_peak_24166
chr22	46191976	46192125	MACS_peak_502	104.99	0	0	0	0	0	0
chr3	974618	974767	MACS_peak_503	54.25	0	0	0	0	0	0
chr3	12078446	12078573	MACS_peak_504	59.83	0	0	0	0	0	0
chr3	26740152	26740295	MACS_peak_505	54.7	0	0	0	0	0	0
chr3	36620040	36620185	MACS_peak_506	106.51	0	0	0	0	0	0
chr3	49170365	49170704	MACS_peak_507	288.79	1	chr3	49167969	49172562	3100	MACS_peak_25053
chr3	49171038	49171283	MACS_peak_508	401.52	1	chr3	49167969	49172562	3100	MACS_peak_25053
chr3	57029556	57029780	MACS_peak_509	142.64	0	0	0	0	0	0
chr3	57789336	57789651	MACS_peak_510	463.78	1	chr3	57787853	57791978	703.69	MACS_peak_25226
chr3	58512521	58512722	MACS_peak_511	259.45	1	chr3	58511100	58513243	361.6	MACS_peak_25248
chr3	62538321	62538452	MACS_peak_512	57.34	0	0	0	0	0	0
chr3	96433544	96433717	MACS_peak_513	54.22	0	0	0	0	0	0
chr3	105086981	105087131	MACS_peak_514	52.67	1	chr3	105082601	105092148	3100	MACS_peak_25663
chr3	111026716	111026831	MACS_peak_515	68.29	0	0	0	0	0	0
chr3	111546745	111546866	MACS_peak_516	60.97	0	0	0	0	0	0
chr3	114819148	114819295	MACS_peak_517	52.15	1	chr3	114817434	114820548	2005.95	MACS_peak_25786
chr3	115954731	115954876	MACS_peak_518	54.22	0	0	0	0	0	0
chr3	117527520	117527665	MACS_peak_519	51.85	0	0	0	0	0	0
chr3	119294304	119294448	MACS_peak_520	74.93	0	0	0	0	0	0
chr3	127467051	127467319	MACS_peak_521	118.64	1	chr3	127464457	127468430	509.29	MACS_peak_25942
chr3	130127122	130127239	MACS_peak_522	73.17	0	0	0	0	0	0
chr3	130579468	130579599	MACS_peak_523	58.74	0	0	0	0	0	0
chr3	135672808	135672949	MACS_peak_524	56.17	0	0	0	0	0	0
chr3	138328134	138328552	MACS_peak_525	252.3	1	chr3	138326239	138329799	3100	MACS_peak_26121
chr3	138328616	138328747	MACS_peak_526	51.72	1	chr3	138326239	138329799	3100	MACS_peak_26121
chr3	142315075	142315348	MACS_peak_527	90.65	1	chr3	142313384	142318154	3100	MACS_peak_26156
chr3	143851868	143852001	MACS_peak_528	58.21	0	0	0	0	0	0
chr3	144294362	144294510	MACS_peak_529	54.49	0	0	0	0	0	0
chr3	148328722	148328887	MACS_peak_530	59.71	0	0	0	0	0	0
chr3	152879187	152879411	MACS_peak_531	101.58	1	chr3	152876850	152886137	3100	MACS_peak_26311
chr3	155462775	155463045	MACS_peak_532	184.23	1	chr3	155460327	155465080	3100	MACS_peak_26332
chr3	155463743	155463929	MACS_peak_533	101.17	1	chr3	155460327	155465080	3100	MACS_peak_26332
chr3	160701916	160702031	MACS_peak_534	70.45	0	0	0	0	0	0
chr3	161156369	161156501	MACS_peak_535	60.51	0	0	0	0	0	0
chr3	163596361	163596491	MACS_peak_536	59.01	0	0	0	0	0	0
chr3	164914591	164914770	MACS_peak_537	121.84	1	chr3	164912999	164916183	3100	MACS_peak_26440
chr3	167053174	167053309	MACS_peak_538	57.69	0	0	0	0	0	0
chr3	167929440	167929546	MACS_peak_539	65.69	1	chr3	167928445	167930568	592.86	MACS_peak_26458
chr3	169381198	169381424	MACS_peak_540	64.31	1	chr3	169377690	169382939	3100	MACS_peak_26483
chr3	177464881	177465011	MACS_peak_541	59.01	0	0	0	0	0	0
chr3	190091377	190091581	MACS_peak_542	59.83	0	0	0	0	0	0
chr3	190621209	190621348	MACS_peak_543	53.3	0	0	0	0	0	0
chr3	193462081	193462225	MACS_peak_544	95.92	1	chr3	193460397	193462844	570.98	MACS_peak_26880
chr3	197845625	197845750	MACS_peak_545	60.39	0	0	0	0	0	0
chr4	1874084	1874320	MACS_peak_546	99.8	1	chr4	1870696	1876690	3100	MACS_peak_27086
chr4	2813730	2814018	MACS_peak_547	146.94	1	chr4	2812529	2816024	1375.14	MACS_peak_27113
chr4	4220875	4220988	MACS_peak_548	53.84	0	0	0	0	0	0
chr4	11998505	11998669	MACS_peak_549	64.93	0	0	0	0	0	0
chr4	13952996	13953189	MACS_peak_550	55.44	0	0	0	0	0	0
chr4	15897391	15897546	MACS_peak_551	58.07	0	0	0	0	0	0
chr4	18174455	18174571	MACS_peak_552	55.92	0	0	0	0	0	0
chr4	18828974	18829124	MACS_peak_553	54.51	0	0	0	0	0	0
chr4	19257355	19257484	MACS_peak_554	50.57	0	0	0	0	0	0
chr4	21305732	21305904	MACS_peak_555	52.07	1	chr4	21304170	21307382	3100	MACS_peak_27366
chr4	25419820	25419964	MACS_peak_556	52.34	0	0	0	0	0	0
chr4	25693265	25693502	MACS_peak_557	79.56	0	0	0	0	0	0
chr4	26321252	26321494	MACS_peak_558	302.07	1	chr4	26318922	26326738	3100	MACS_peak_27443
chr4	26322156	26322505	MACS_peak_559	311.2	1	chr4	26318922	26326738	3100	MACS_peak_27443
chr4	27546528	27546713	MACS_peak_560	52.67	0	0	0	0	0	0
chr4	31850114	31850259	MACS_peak_561	51.33	0	0	0	0	0	0
chr4	32074497	32074620	MACS_peak_562	59.14	0	0	0	0	0	0
chr4	32573096	32573174	MACS_peak_563	77.84	0	0	0	0	0	0
chr4	32647361	32647647	MACS_peak_564	118.63	0	0	0	0	0	0
chr4	34024747	34024876	MACS_peak_565	52.24	0	0	0	0	0	0
chr4	38062466	38062625	MACS_peak_566	77.28	1	chr4	38062948	38065050	153.75	MACS_peak_27521
chr4	38340607	38340869	MACS_peak_567	98.29	0	0	0	0	0	0
chr4	40751799	40752014	MACS_peak_568	82.64	1	chr4	40750559	40754555	3100	MACS_peak_27580
chr4	41216480	41216724	MACS_peak_569	239.44	1	chr4	41213591	41220299	3100	MACS_peak_27589
chr4	43476984	43477120	MACS_peak_570	50.93	0	0	0	0	0	0
chr4	43904680	43904816	MACS_peak_571	51.12	0	0	0	0	0	0
chr4	46618454	46618623	MACS_peak_572	58.99	0	0	0	0	0	0
chr4	48629825	48629962	MACS_peak_573	51.87	0	0	0	0	0	0
chr4	52871049	52871190	MACS_peak_574	52.81	0	0	0	0	0	0
chr4	55316304	55316472	MACS_peak_575	92.92	0	0	0	0	0	0
chr4	61777622	61777784	MACS_peak_576	52.67	0	0	0	0	0	0
chr4	65497965	65498105	MACS_peak_577	50.49	0	0	0	0	0	0
chr4	66569081	66569220	MACS_peak_578	53.89	0	0	0	0	0	0
chr4	67323277	67323403	MACS_peak_579	54.46	0	0	0	0	0	0
chr4	70476457	70476609	MACS_peak_580	50.18	0	0	0	0	0	0
chr4	73433921	73434083	MACS_peak_581	58.89	1	chr4	73431376	73436501	3100	MACS_peak_27874
chr4	74827150	74827277	MACS_peak_582	51.76	0	0	0	0	0	0
chr4	75177968	75178137	MACS_peak_583	61.68	0	0	0	0	0	0
chr4	77359317	77359457	MACS_peak_584	56.75	0	0	0	0	0	0
chr4	82252309	82252417	MACS_peak_585	53.25	0	0	0	0	0	0
chr4	88215178	88215293	MACS_peak_586	62.15	0	0	0	0	0	0
chr4	91949632	91949783	MACS_peak_587	50.44	0	0	0	0	0	0
chr4	92888532	92888662	MACS_peak_588	51.98	0	0	0	0	0	0
chr4	97388289	97388455	MACS_peak_589	60.29	0	0	0	0	0	0
chr4	103419358	103419499	MACS_peak_590	54.36	0	0	0	0	0	0
chr4	104211261	104211431	MACS_peak_591	50.12	0	0	0	0	0	0
chr4	104625673	104625819	MACS_peak_592	51.61	0	0	0	0	0	0
chr4	105877573	105877709	MACS_peak_593	52.92	0	0	0	0	0	0
[truncated: 289 more rows]

## Sheet: FXR1_vs_STAT1-H358
FXR1-STAT1 overlap
[truncated: 883 more rows]

[truncated: 3 more sheets: FXR1_vs_STAT3-H358, H3K9me3 gene peaks-H358, H3K27me3-gene peaks-H358]
