# Supplementary material for: FXR1 regulates transcription and is required for growth of human cancer cells with TP53/FXR2 homozygous deletion
Source: eLife journal article supplement (doi:10.7554/elife.26129), 2017-08-02
Supplement: supp [file elife-26129-supp-v2.zip › elife_poa_e26129_Supplementary_File_4.xlsx]

## Sheet: OverlapGene
Table S4: GO pathway analysis of FXR1-H3K4me3 or FXR1-STATs overlapped or non-overlapped ChIP-seq target genes in H358 cells.
GO pathway analysis of FXR1-H3K4me3-STATs overlapped ChIP-seq target genes in H358 cells.
FXR1 unique	FXR1_overlap_H3K4me3		FXR1 unique	FXR1_overlap_STAT1	FXR1_overlap_STAT3	FXR1_overlap_STAT1_STAT3
ANKRD20A8P	ABCA17P		ADGRL1	AGAP3	ADPRH	ABCA17P
ANKRD30B	ACOX2		ANKRD20A8P	AP3B1	ARHGAP20	ACOX2
CNTNAP5	ACTR3		ANKRD30B	C4orf32	ARHGEF11	ACTR3
CRAT37	ADAMTS3		ANKRD36C	C5orf42	ASTN1	ADAMTS3
DPP10	ADGRL1		ARPC5	CAPS2	ATN1	ADGRL2
FAM231D	ADGRL2		ARX	CITED1	ATP2C1	AGAP1
FGF10-AS1	ADPRH		ASTN2	CYP2R1	BRINP3	AIFM1
GABRG3	AGAP1		ATF7IP	FBXO16	C12orf40	AK5
GLYAT	AGAP3		BAIAP2L2	FZD3	CADPS	ALCAM
KRTAP7-1	AIFM1		BPNT1	GLIPR1L1	CDH10	ANAPC4
LINC00251	AK5		CASZ1	GPR107	CNTN5	ANXA2
LINC00930	ALCAM		CCDC85A	KLLN	CRB1	APBB2
LINC01246	ANAPC4		CDK14	KRTCAP2	DDC	ARHGAP10
LINC01299	ANKRD36C		CISD1	LOC101929076	DDC-AS1	ARHGEF3
LMX1A	ANXA2		CNTNAP4	LOC101929140	DDR2	ARID1A
LOC100233156	AP3B1		CNTNAP5	LRRC3B	DGKB	ATXN10
LOC100996741	APBB2		COMMD10	MIR6125	DPP8	BAZ2B
LOC101926960	ARHGAP10		CRAT37	MYCBP2	EML2	BCAR3
LOC101928622	ARHGAP20		CSAG1	NDUFA10	EML2-AS1	BCL9
LOC388692	ARHGEF11		CSAG4	PRDM15	EMX1	BCYRN1
MEG8	ARHGEF3		CTNNA2	PSMD1	ENO2	C1orf132
MROH2B	ARID1A		CYP1A1	PTEN	EYS	C1orf61
MYOCD	ARPC5		DPP10	RALGPS2	FBN2	C21orf62-AS1
NTM	ARX		EBF2	RBM25	FILIP1	C8orf46
OR4K17	ASTN1		ELP2	RNU5F-1	FKBP14	CAMTA1
OR5AS1	ASTN2		ERG	RPL5	GPC4	CAPN2
OTOP1	ATF7IP		FAM231D	SGMS1-AS1	GRIK1	CASC4
PREX2	ATN1		FGF10-AS1	TOGARAM1	HIST1H2AM	CCDC141
REXO1L2P	ATP2C1		GABRG3	ZMYM3	HIST1H2BO	CCSER1
SHE	ATXN10		GLB1L3		HIST1H3J	CDC42EP3
SNORD114-26	BAIAP2L2		GLCE		IDO2	CDH18
SNORD114-27	BAZ2B		GLYAT		IQGAP2	CDYL2
SNORD114-28	BCAR3		GUSBP1		KIF13B	CENPU
SNORD114-29	BCL9		HS6ST3		LAMB2	CLMP
SNORD114-30	BCYRN1		IARS2		LINC00449	CNTN1
SNORD114-31	BPNT1		IL16		LINC01232	COA1
TACR3	BRINP3		IPMK		LINC01350	COL6A5
TBX4	C12orf40		KCNB2		LINC01799	COLEC10
UGT2A1	C1orf132		KCNU1		LOC101928438	CPQ
UGT2A2	C1orf61		KRTAP7-1		LOC102723828	CPSF3
	C21orf62-AS1		LGR5		LRFN5	CSMD3
	C4orf32		LINC00251		LRRC7	CXXC5
	C5orf42		LINC00930		MDGA2	CYSRT1
	C8orf46		LINC01246		MEX3A	DAB1
	CADPS		LINC01299		MIR4799	DAB2IP
	CAMTA1		LINC01775		MROH2B	DDX59
	CAPN2		LINC02067		MYOCD	DENND2A
	CAPS2		LMX1A		NCKAP5	DIXDC1
	CASC4		LOC100128006		NELL2	DLAT
	CASZ1		LOC100233156		NMNAT2	DLG2
	CCDC141		LOC100289473		NPHP1	DNAH14
	CCDC85A		LOC100505874		PCNX2	DNAH17
	CCSER1		LOC100996741		PDE1A	DNAH2
	CDC42EP3		LOC101926960		PHLDB2	DNAJC11
	CDH10		LOC105379477		PIGM	DPY30
	CDH18		LOC388692		PLA2G6	E2F6
	CDK14		LRRC66		PLCL1	EPGN
	CDYL2		MAGEA12		PLCXD2	EPS15
	CENPU		MEG8		PLD5	ETFA
	CISD1		MINOS1		PLEKHA8	EXT1
	CITED1		MIR3665		PLS1	FA2H
	CLMP		MSANTD4		PPM1E	FAAH
	CNTN1		MYO7A		PTPRR	FADS2
	CNTN5		NBEAL1		RNF219-AS1	FAIM
	CNTNAP4		NTM		RPAP3	FAM172A
	COA1		OR4K17		SLC2A13	FAM189B
	COL6A5		OR5AS1		SLITRK3	FAM69A
	COLEC10		OTOP1		SNHG14	FAM84B
	COMMD10		PREX2		STPG4	FER1L5
	CPQ		RAP2A		STX12	FGF21
	CPSF3		REXO1L2P		SUZ12P1	FN3K
	CRB1		SGTB		SYN2	FNBP1L
	CSAG1		SHE		TBX4	FOXP2
	CSAG4		SLAIN1		TDRD9	FPGT-TNNI3K
	CSMD3		SLC1A3		TM9SF2	FRYL
	CTNNA2		SLC39A6		TSGA10	FUT1
	CXXC5		SNORD114-26		UGGT2	FUT10
	CYP1A1		SNORD114-27		UNC5D	FUT8
	CYP2R1		SNORD114-28		VSTM2A	GALNTL6
	CYSRT1		SNORD114-29		XIRP2	GBA
	DAB1		SNORD114-30		ZBBX	GBP3
	DAB2IP		SNORD114-31		ZBTB41	GCLC
	DDC		SYT5		ZNF792	GLI1
	DDC-AS1		TACR3			GPHN
	DDR2		UGT2A1			GRM5
	DDX59		UGT2A2			HEATR6
	DENND2A		UNC80			HNF4G
	DGKB		ZNF212			HSPBP1
	DIXDC1		ZNF33A			IGF1R
	DLAT		ZNF568			IMMP2L
	DLG2		ZNF804A			INHBE
	DNAH14					INO80C
	DNAH17					INPP4B
	DNAH2					INSR
	DNAJC11					INTS10
	DPP8					INTS4
	DPY30					ITGB1BP1
	E2F6					KANSL3
	EBF2					KCNIP4
	ELP2					KCNJ4
	EML2					KDM4C
	EML2-AS1					KDM6B
	EMX1					KDSR
	ENO2					KIF16B
	EPGN					KIFC3
	EPS15					KLF12
	ERG					KLHDC9
	ETFA					KLHL13
	EXT1					KRT8
	EYS					LEPROTL1
	FA2H					LIFR-AS1
	FAAH					LINC00359
	FADS2					LINC00511
	FAIM					LINC00578
	FAM172A					LINC00866
	FAM189B					LINC01122
	FAM69A					LINC01592
	FAM84B					LIPC
	FBN2					LIPC-AS1
	FBXO16					LMNA
	FER1L5					LNPEP
	FGF21					LOC100130987
	FILIP1					LOC100506023
	FKBP14					LOC100507412
	FN3K					LOC101060091
	FNBP1L					LOC101928622
	FOXP2					LOC101928728
	FPGT-TNNI3K					LOC101928737
	FRYL					LOC101929224
	FUT1					LOC102724058
	FUT10					LOC105371849
	FUT8					LOC105377621
	FZD3					LOC148696
	GALNTL6					LOC388282
	GBA					LRRC1
	GBP3					LSAMP
	GCLC					LSR
	GLB1L3					MACROD2
	GLCE					MAML3
	GLI1					MAST1
	GLIPR1L1					MCC
	GPC4					MDGA1
	GPHN					MECOM
	GPR107					MEMO1
	GRIK1					MFAP3L
	GRM5					MGLL
	GUSBP1					MINOS1-NBL1
	HEATR6					MIPOL1
	HIST1H2AM					MIR1538
	HIST1H2BO					MIR3681HG
	HIST1H3J					MIR5188
	HNF4G					MIR548H4
	HS6ST3					MIR661
	HSPBP1					MIR6850
	IARS2					MIR9-1
	IDO2					MKKS
	IGF1R					MNT
	IL16					MTMR11
	IMMP2L					MYOF
	INHBE					NAV2
	INO80C					NDOR1
	INPP4B					NEDD4
	INSR					NFAT5
	INTS10					NFATC4
	INTS4					NFKB1
	IPMK					NHS
	IQGAP2					NKAIN3
	ITGB1BP1					NOTCH3
	KANSL3					NPAS3
	KCNB2					NR2F1
	KCNIP4					NR2F1-AS1
	KCNJ4					NR5A2
	KCNU1					NSD2
	KDM4C					NSUN7
	KDM6B					NUMA1
	KDSR					OSGIN1
	KIF13B					OSMR-AS1
	KIF16B					OTUD7B
	KIFC3					PADI1
	KLF12					PAPPA2
	KLHDC9					PAXBP1
	KLHL13					PCDH9
	KLLN					PCLO
	KRT8					PDE1C
	KRTCAP2					PDE4D
	LAMB2					PDE8A
	LEPROTL1					PDXK
	LGR5					PFDN2
	LIFR-AS1					PGRMC2
	LINC00359					PITPNM3
	LINC00449					PLCB1
	LINC00511					PLCH1
	LINC00578					PLEC
	LINC00866					POLD4
	LINC01122					PPM1L
	LINC01232					PPP2CB
	LINC01350					PPP6R1
	LINC01592					PRRC2C
	LINC01775					PSPC1
	LINC01799					PTMA
	LINC02067					PTPN4
	LIPC					PTPRH
	LIPC-AS1					RAD51B
	LMNA					RALGAPA2
	LNPEP					RALYL
	LOC100128006					RAP2B
	LOC100130987					RBPJ
	LOC100289473					RGS3
	LOC100505874					RNF114
	LOC100506023					RNF208
	LOC100507412					RNF224
	LOC101060091					RPL26
	LOC101928438					RPL8
	LOC101928728					RPS19BP1
	LOC101928737					RPTOR
	LOC101929076					RTBDN
	LOC101929140					RTEL1
	LOC101929224					RTEL1-TNFRSF6B
	LOC102723828					SCAMP1
	LOC102724058					SCAMP1-AS1
	LOC105371849					SEMA3A
	LOC105377621					SEMA6A
	LOC105379477					SGMS1
	LOC148696					SH3BP2
	LOC388282					SHB
	LRFN5					SHROOM3
	LRRC1					SIK3
	LRRC3B					SLC25A21
	LRRC66					SLC28A1
	LRRC7					SLC2A1
	LSAMP					SLC2A1-AS1
	LSR					SLC45A4
	MACROD2					SLC4A10
	MAGEA12					SLCO3A1
	MAML3					SLMAP
	MAST1					SLX4IP
	MCC					SMARCD2
	MDGA1					SNX16
	MDGA2					SOX5
	MECOM					SPATA5
	MEMO1					SPRED2
	MEX3A					SRCIN1
	MFAP3L					SSBP2
	MGLL					STARD4-AS1
	MINOS1					STX6
	MINOS1-NBL1					SYNPO2
	MIPOL1					SYT7
	MIR1538					SYTL1
	MIR3665					TAF2
	MIR3681HG					TBC1D1
	MIR4799					TBCD
	MIR5188					TGM2
	MIR548H4					TJP3
	MIR6125					TLE3
	MIR661					TMCO3
	MIR6850					TMEM127
	MIR9-1					TMEM248
	MKKS					TNNI3K
	MNT					TOX
	MSANTD4					TRAPPC9
	MTMR11					TRIM46
	MYCBP2					TRIM55
	MYO7A					TRIO
	MYOF					TRIP4
	NAV2					TRNAU1AP
	NBEAL1					TSC22D3
	NCKAP5					UBC
	NDOR1					UBE3A
	NDUFA10					USP15
	NEDD4					USP3
	NELL2					WDR70
	NFAT5					WFDC21P
	NFATC4					WWOX
	NFKB1					WWP1
	NHS					YARS
	NKAIN3					YLPM1
	NMNAT2					ZBTB20
	NOTCH3					ZBTB20-AS4
	NPAS3					ZBTB7B
	NPHP1					ZCCHC14
	NR2F1					ZCCHC6
	NR2F1-AS1					ZFPM2
	NR5A2					ZFYVE26
	NSD2					ZNF280D
	NSUN7					ZNF34
	NUMA1					ZNF462
	OSGIN1					ZNF827
	OSMR-AS1					ZNRF3
	OTUD7B					ZNRF3-AS1
	PADI1					ZRANB3
	PAPPA2
	PAXBP1
	PCDH9
	PCLO
	PCNX2
	PDE1A
	PDE1C
	PDE4D
	PDE8A
	PDXK
	PFDN2
	PGRMC2
	PHLDB2
	PIGM
	PITPNM3
	PLA2G6
	PLCB1
	PLCH1
	PLCL1
	PLCXD2
	PLD5
	PLEC
	PLEKHA8
	PLS1
	POLD4
	PPM1E
	PPM1L
	PPP2CB
	PPP6R1
	PRDM15
	PRRC2C
	PSMD1
	PSPC1
	PTEN
	PTMA
	PTPN4
	PTPRH
	PTPRR
	RAD51B
	RALGAPA2
	RALGPS2
	RALYL
	RAP2A
	RAP2B
	RBM25
	RBPJ
	RGS3
	RNF114
	RNF208
	RNF219-AS1
	RNF224
	RNU5F-1
	RPAP3
	RPL26
	RPL5
	RPL8
	RPS19BP1
	RPTOR
	RTBDN
	RTEL1
	RTEL1-TNFRSF6B
	SCAMP1
	SCAMP1-AS1
	SEMA3A
	SEMA6A
	SGMS1
	SGMS1-AS1
	SGTB
	SH3BP2
	SHB
	SHROOM3
	SIK3
	SLAIN1
	SLC1A3
	SLC25A21
	SLC28A1
	SLC2A1
	SLC2A13
	SLC2A1-AS1
	SLC39A6
	SLC45A4
	SLC4A10
	SLCO3A1
	SLITRK3
	SLMAP
	SLX4IP
	SMARCD2
	SNHG14
	SNX16
	SOX5
	SPATA5
	SPRED2
	SRCIN1
	SSBP2
	STARD4-AS1
	STPG4
	STX12
	STX6
	SUZ12P1
	SYN2
	SYNPO2
	SYT5
	SYT7
	SYTL1
	TAF2
	TBC1D1
	TBCD
	TDRD9
	TGM2
	TJP3
	TLE3
	TM9SF2
	TMCO3
	TMEM127
	TMEM248
	TNNI3K
	TOGARAM1
	TOX
	TRAPPC9
	TRIM46
	TRIM55
	TRIO
	TRIP4
	TRNAU1AP
	TSC22D3
	TSGA10
	UBC
	UBE3A
	UGGT2
	UNC5D
	UNC80
	USP15
	USP3
	VSTM2A
	WDR70
	WFDC21P
	WWOX
	WWP1
	XIRP2
	YARS
	YLPM1
	ZBBX
	ZBTB20
	ZBTB20-AS4
	ZBTB41
	ZBTB7B
	ZCCHC14
	ZCCHC6
	ZFPM2
	ZFYVE26
	ZMYM3
	ZNF212
	ZNF280D
	ZNF33A
	ZNF34
	ZNF462
	ZNF568
	ZNF792
	ZNF804A
	ZNF827
	ZNRF3
	ZNRF3-AS1
	ZRANB3

## Sheet: FXR1_Over_H3K4me3_GO
GO pathway analysis of FXR1-H3K4me3 overlapped ChIP-seq target genes in H358 cells.
Annotation Cluster 1	Enrichment Score: 4.202213175898805
Category	Term	Count	%	PValue	Genes	List Total	Pop Hits	Pop Total	Fold Enrichment	Bonferroni	Benjamini	FDR
GOTERM_BP_FAT	GO:0007417~central nervous system development	41	9.15179	1.52985e-06	GRIK1, UBE3A, ARPC5, C5ORF42, PTEN, CITED1, GLI1, ARX, CCDC141, IMMP2L, DAB1, LAMB2, ATN1, WWP1, CASZ1, MKKS, UNC5D, SEMA3A, PLCB1, SPATA5, DIXDC1, DAB2IP, EMX1, FA2H, MDGA1, FUT10, MDGA2, MACROD2, PCDH9, ARID1A, FZD3, CTNNA2, FOXP2, NOTCH3, SLC4A10, TRAPPC9, NAV2, CNTN1, RBPJ, EXT1, KDM6B	330	904	16650	2.28831	0.00628163	0.00628163	0.00285193
GOTERM_BP_FAT	GO:0021987~cerebral cortex development	12	2.67857	7.92939e-06	CCDC141, ARX, DIXDC1, DAB2IP, DAB1, TRAPPC9, EMX1, FUT10, MKKS, SEMA3A, PLCB1, FOXP2	330	106	16650	5.71184	0.0321337	0.016198	0.0147811
GOTERM_BP_FAT	GO:0030900~forebrain development	22	4.91071	1.0962e-05	DIXDC1, DAB2IP, EMX1, FUT10, PCDH9, ARID1A, ARPC5, PTEN, FOXP2, GLI1, NOTCH3, ARX, CCDC141, SLC4A10, DAB1, TRAPPC9, MKKS, SEMA3A, RBPJ, PLCB1, EXT1, KDM6B	330	361	16650	3.07479	0.0441485	0.0149382	0.0204336
GOTERM_BP_FAT	GO:0021543~pallium development	14	3.125	1.46065e-05	ARX, CCDC141, DIXDC1, DAB2IP, DAB1, EMX1, TRAPPC9, FUT10, MKKS, SEMA3A, PLCB1, PTEN, KDM6B, FOXP2	330	157	16650	4.49913	0.0583905	0.0149286	0.0272262
GOTERM_BP_FAT	GO:0007420~brain development	32	7.14286	1.55821e-05	UBE3A, ARPC5, C5ORF42, PTEN, CITED1, GLI1, ARX, CCDC141, IMMP2L, DAB1, MKKS, SEMA3A, PLCB1, SPATA5, DIXDC1, DAB2IP, EMX1, MDGA1, FUT10, MACROD2, PCDH9, ARID1A, FZD3, CTNNA2, FOXP2, NOTCH3, SLC4A10, TRAPPC9, CNTN1, RBPJ, EXT1, KDM6B	330	684	16650	2.36045	0.0621669	0.0127546	0.0290445
GOTERM_BP_FAT	GO:0007399~nervous system development	71	15.8482	1.89704e-05	GRIK1, SRCIN1, MYO7A, PTEN, CITED1, GLI1, CCDC141, IMMP2L, DAB1, SLC1A3, ATXN10, WWP1, MKKS, UNC5D, SEMA3A, BRINP3, PLCB1, IPMK, BPNT1, DLG2, NR2F1, KIF13B, RAP2A, DAB2IP, ZNF280D, EMX1, MINOS1-NBL1, AIFM1, MDGA1, FA2H, MDGA2, FUT10, PCDH9, ARID1A, PCLO, CTNNA2, SLITRK3, TRAPPC9, NAV2, LSAMP, CNTN1, EXT1, KDM6B, SHROOM3, UBE3A, FRYL, SOX5, ASTN1, ARPC5, C5ORF42, ALCAM, ARX, LAMB2, CRB1, ATN1, CAS…	330	2170	16650	1.65082	0.0751648	0.0129389	0.0353591
GOTERM_BP_FAT	GO:0060322~head development	32	7.14286	4.12368e-05	UBE3A, ARPC5, C5ORF42, PTEN, CITED1, GLI1, ARX, CCDC141, IMMP2L, DAB1, MKKS, SEMA3A, PLCB1, SPATA5, DIXDC1, DAB2IP, EMX1, MDGA1, FUT10, MACROD2, PCDH9, ARID1A, FZD3, CTNNA2, FOXP2, NOTCH3, SLC4A10, TRAPPC9, CNTN1, RBPJ, EXT1, KDM6B	330	720	16650	2.24242	0.156215	0.0239734	0.0768466
GOTERM_BP_FAT	GO:0021537~telencephalon development	15	3.34821	0.000210555	ARX, CCDC141, DIXDC1, DAB2IP, DAB1, EMX1, TRAPPC9, FUT10, MKKS, SEMA3A, PLCB1, EXT1, PTEN, KDM6B, FOXP2	330	231	16650	3.27627	0.579945	0.10275	0.391793
GOTERM_BP_FAT	GO:0021795~cerebral cortex cell migration	7	1.5625	0.000213166	CCDC141, ARX, DIXDC1, DAB2IP, DAB1, FUT10, SEMA3A	330	44	16650	8.02686	0.584438	0.0929604	0.396641
GOTERM_BP_FAT	GO:0022029~telencephalon cell migration	7	1.5625	0.00106192	CCDC141, ARX, DIXDC1, DAB2IP, DAB1, FUT10, SEMA3A	330	59	16650	5.98613	0.987429	0.328238	1.96121
GOTERM_BP_FAT	GO:0021885~forebrain cell migration	7	1.5625	0.00137899	CCDC141, ARX, DIXDC1, DAB2IP, DAB1, FUT10, SEMA3A	330	62	16650	5.69648	0.9966	0.377284	2.53971
GOTERM_BP_FAT	GO:0021799~cerebral cortex radially oriented cell migration	5	1.11607	0.00240655	CCDC141, DIXDC1, DAB2IP, DAB1, FUT10	330	29	16650	8.69906	0.999951	0.483993	4.39236
Annotation Cluster 2	Enrichment Score: 2.6168962820438026
Category	Term	Count	%	PValue	Genes	List Total	Pop Hits	Pop Total	Fold Enrichment	Bonferroni	Benjamini	FDR
GOTERM_MF_FAT	GO:0046872~metal ion binding	109	24.3304	0.0019173	SYT5, NELL2, ZNF827, SYT7, ZNRF3, TRIM46, CISD1, PLS1, BPNT1, PDXK, CYP1A1, FA2H, PDE4D, ZNF792, HNF4G, MECOM, PCLO, RNF224, PITPNM3, ATP2C1, ADAMTS3, EXT1, GCLC, CXXC5, ASTN2, CAPS2, CRB1, PLCH1, OTUD7B, CASZ1, TAF2, TRIP4, KLF12, ZMYM3, ZBTB41, FOXP2, ADPRH, NOTCH3, TRIM55, EPS15, ZNF212, RNF208, EBF2, DDX59, CYP2R1, PAPPA2, SYTL1, ZBBX, PTEN, KCNIP4, GLI1, LNPEP, GALNTL6, PDE8A, AGAP1, RTEL1-T…	315	4166	15478	1.28562	0.783369	0.534563	2.90151
GOTERM_MF_FAT	GO:0043167~ion binding	113	25.2232	0.00259089	SYT5, NELL2, ZNF827, SYT7, ZNRF3, TRIM46, CISD1, PLS1, BPNT1, PDXK, CYP1A1, FA2H, PDE4D, ZNF792, HNF4G, MECOM, PCLO, RNF224, PITPNM3, ATP2C1, ADAMTS3, EXT1, GCLC, CXXC5, ASTN2, CAPS2, CRB1, PLCH1, OTUD7B, CASZ1, TAF2, TRIP4, KLF12, ZMYM3, ZBTB41, FOXP2, ADPRH, NOTCH3, TRIM55, EPS15, ZNF212, RNF208, NEDD4, EBF2, DDX59, CYP2R1, PAPPA2, SYTL1, ZBBX, PTEN, KCNIP4, GLI1, LNPEP, SLC1A3, GALNTL6, PDE8A,…	315	4386	15478	1.26594	0.873513	0.498025	3.90205
GOTERM_MF_FAT	GO:0043169~cation binding	109	24.3304	0.00283904	SYT5, NELL2, ZNF827, SYT7, ZNRF3, TRIM46, CISD1, PLS1, BPNT1, PDXK, CYP1A1, FA2H, PDE4D, ZNF792, HNF4G, MECOM, PCLO, RNF224, PITPNM3, ATP2C1, ADAMTS3, EXT1, GCLC, CXXC5, ASTN2, CAPS2, CRB1, PLCH1, OTUD7B, CASZ1, TAF2, TRIP4, KLF12, ZMYM3, ZBTB41, FOXP2, ADPRH, NOTCH3, TRIM55, EPS15, ZNF212, RNF208, EBF2, DDX59, CYP2R1, PAPPA2, SYTL1, ZBBX, PTEN, KCNIP4, GLI1, LNPEP, GALNTL6, PDE8A, AGAP1, RTEL1-T…	315	4213	15478	1.27127	0.896267	0.3644	4.26821
Annotation Cluster 3	Enrichment Score: 2.103844658444892
Category	Term	Count	%	PValue	Genes	List Total	Pop Hits	Pop Total	Fold Enrichment	Bonferroni	Benjamini	FDR
GOTERM_CC_FAT	GO:0097458~neuron part	45	10.0446	0.000560045	SRCIN1, SYT5, MYO7A, ASTN1, ASTN2, ARPC5, SYT7, PTEN, ALCAM, NUMA1, GPHN, DAB1, SLC1A3, ATXN10, PDE1A, SYN2, ENO2, MKKS, SEMA3A, BRINP3, DLG2, LRRC7, AP3B1, KIF13B, SCAMP1, STX6, DDC, DAB2IP, CNTNAP4, KCNB2, PCDH9, ARID1A, FZD3, CAPN2, PCLO, RPTOR, CTNNA2, CADPS, GRM5, SEMA6A, SLC4A10, TSGA10, ADGRL1, APBB2, SYTL1	290	1333	14527	1.69107	0.240473	0.0876088	0.801425
GOTERM_CC_FAT	GO:0043025~neuronal cell body	18	4.01786	0.00442486	DDC, DAB2IP, SRCIN1, SYT5, KCNB2, ASTN1, FZD3, ASTN2, RPTOR, ALCAM, NUMA1, SLC4A10, DAB1, SLC1A3, ATXN10, PDE1A, ENO2, BRINP3	290	419	14527	2.15197	0.886667	0.304347	6.17117
GOTERM_CC_FAT	GO:0043005~neuron projection	32	7.14286	0.00572276	SRCIN1, SYT5, ARPC5, SYT7, PTEN, ALCAM, NUMA1, GPHN, SLC1A3, DAB1, ATXN10, SEMA3A, BRINP3, DLG2, AP3B1, KIF13B, STX6, DDC, DAB2IP, CNTNAP4, KCNB2, PCDH9, FZD3, CAPN2, RPTOR, CTNNA2, GRM5, SEMA6A, SLC4A10, TSGA10, ADGRL1, APBB2	290	966	14527	1.6594	0.940272	0.296891	7.91294
GOTERM_CC_FAT	GO:0036477~somatodendritic compartment	23	5.13393	0.0129577	DDC, DAB2IP, CNTNAP4, SRCIN1, SYT5, KCNB2, ASTN1, FZD3, ASTN2, CAPN2, PTEN, RPTOR, ALCAM, GPHN, NUMA1, SLC4A10, DAB1, SLC1A3, ATXN10, PDE1A, ENO2, SEMA3A, BRINP3	290	662	14527	1.74039	0.998345	0.41354	17.0835
GOTERM_CC_FAT	GO:0044297~cell body	18	4.01786	0.0157029	DDC, DAB2IP, SRCIN1, SYT5, KCNB2, ASTN1, FZD3, ASTN2, RPTOR, ALCAM, NUMA1, SLC4A10, DAB1, SLC1A3, ATXN10, PDE1A, ENO2, BRINP3	290	480	14527	1.87849	0.999578	0.449975	20.335
GOTERM_CC_FAT	GO:0030425~dendrite	15	3.34821	0.0825463	DAB2IP, SRCIN1, CNTNAP4, KCNB2, FZD3, CAPN2, PTEN, RPTOR, ALCAM, NUMA1, SLC4A10, GPHN, ATXN10, SEMA3A, BRINP3	290	466	14527	1.61244	1	0.722478	70.9884
Annotation Cluster 4	Enrichment Score: 1.9223208493364488
Category	Term	Count	%	PValue	Genes	List Total	Pop Hits	Pop Total	Fold Enrichment	Bonferroni	Benjamini	FDR
GOTERM_CC_FAT	GO:0005912~adherens junction	26	5.80357	0.00305853	SHROOM3, SRCIN1, ARPC5, NHS, DDR2, KIFC3, ALCAM, ACTR3, RPL8, TGM2, RPL5, NPHP1, PLEC, DIXDC1, HIST1H3J, DAB2IP, SYNPO2, CAPN2, ANXA2, CTNNA2, EPS15, NOTCH3, FNBP1L, ITGB1BP1, TBCD, PHLDB2	290	694	14527	1.87669	0.777769	0.313404	4.30449
GOTERM_CC_FAT	GO:0070161~anchoring junction	26	5.80357	0.00418314	SHROOM3, SRCIN1, ARPC5, NHS, DDR2, KIFC3, ALCAM, ACTR3, RPL8, TGM2, RPL5, NPHP1, PLEC, DIXDC1, HIST1H3J, DAB2IP, SYNPO2, CAPN2, ANXA2, CTNNA2, EPS15, NOTCH3, FNBP1L, ITGB1BP1, TBCD, PHLDB2	290	711	14527	1.83182	0.87232	0.337441	5.84342
GOTERM_CC_FAT	GO:0005925~focal adhesion	15	3.34821	0.0248703	DIXDC1, SRCIN1, SYNPO2, ARPC5, NHS, CAPN2, DDR2, ACTR3, ALCAM, ITGB1BP1, RPL8, TGM2, RPL5, PHLDB2, PLEC	290	391	14527	1.92173	0.999996	0.496909	30.354
GOTERM_CC_FAT	GO:0005924~cell-substrate adherens junction	15	3.34821	0.026462	DIXDC1, SRCIN1, SYNPO2, ARPC5, NHS, CAPN2, DDR2, ACTR3, ALCAM, ITGB1BP1, RPL8, TGM2, RPL5, PHLDB2, PLEC	290	394	14527	1.9071	0.999998	0.482317	31.9692
GOTERM_CC_FAT	GO:0030055~cell-substrate junction	15	3.34821	0.0290455	DIXDC1, SRCIN1, SYNPO2, ARPC5, NHS, CAPN2, DDR2, ACTR3, ALCAM, ITGB1BP1, RPL8, TGM2, RPL5, PHLDB2, PLEC	290	399	14527	1.8832	0.999999	0.467004	34.5169
Annotation Cluster 5	Enrichment Score: 1.865567020240791
Category	Term	Count	%	PValue	Genes	List Total	Pop Hits	Pop Total	Fold Enrichment	Bonferroni	Benjamini	FDR
GOTERM_MF_FAT	GO:0005543~phospholipid binding	18	4.01786	0.000940175	DAB2IP, BAIAP2L2, SYT5, SNX16, IQGAP2, SYT7, KIF16B, PCLO, ZCCHC14, ANXA2, PLEKHA8, ZFYVE26, NR5A2, AGAP1, PLCB1, MYOF, SYTL1, NBEAL1	315	354	15478	2.49847	0.527478	0.527478	1.43277
GOTERM_MF_FAT	GO:1901981~phosphatidylinositol phosphate binding	9	2.00893	0.00309323	DAB2IP, PLEKHA8, SYT5, ZFYVE26, IQGAP2, SYT7, KIF16B, PLCB1, ANXA2	315	120	15478	3.68524	0.915341	0.337358	4.64194
GOTERM_MF_FAT	GO:0035091~phosphatidylinositol binding	11	2.45536	0.0104453	DAB2IP, PLEKHA8, SYT5, ZFYVE26, SNX16, IQGAP2, SYT7, KIF16B, PLCB1, ZCCHC14, ANXA2	315	209	15478	2.58613	0.999768	0.502119	14.8793
GOTERM_MF_FAT	GO:0008289~lipid binding	23	5.13393	0.0146933	DAB2IP, BAIAP2L2, SYT5, SNX16, IQGAP2, SYT7, KIF16B, PCLO, PTEN, ZCCHC14, ANXA2, CADPS, PITPNM3, PLEKHA8, FNBP1L, ZFYVE26, PGRMC2, PLCB1, AGAP1, NR5A2, MYOF, SYTL1, NBEAL1	315	656	15478	1.72277	0.999992	0.521616	20.3162
GOTERM_MF_FAT	GO:0005546~phosphatidylinositol-4,5-bisphosphate binding	4	0.892857	0.113329	SYT5, SYT7, PLCB1, ANXA2	315	58	15478	3.38872	1	0.935364	84.204
GOTERM_MF_FAT	GO:1902936~phosphatidylinositol bisphosphate binding	4	0.892857	0.126646	SYT5, SYT7, PLCB1, ANXA2	315	61	15478	3.22207	1	0.913952	87.4768
Annotation Cluster 6	Enrichment Score: 1.6310145327840666
Category	Term	Count	%	PValue	Genes	List Total	Pop Hits	Pop Total	Fold Enrichment	Bonferroni	Benjamini	FDR
GOTERM_BP_FAT	GO:0007399~nervous system development	71	15.8482	1.89704e-05	GRIK1, SRCIN1, MYO7A, PTEN, CITED1, GLI1, CCDC141, IMMP2L, DAB1, SLC1A3, ATXN10, WWP1, MKKS, UNC5D, SEMA3A, BRINP3, PLCB1, IPMK, BPNT1, DLG2, NR2F1, KIF13B, RAP2A, DAB2IP, ZNF280D, EMX1, MINOS1-NBL1, AIFM1, MDGA1, FA2H, MDGA2, FUT10, PCDH9, ARID1A, PCLO, CTNNA2, SLITRK3, TRAPPC9, NAV2, LSAMP, CNTN1, EXT1, KDM6B, SHROOM3, UBE3A, FRYL, SOX5, ASTN1, ARPC5, C5ORF42, ALCAM, ARX, LAMB2, CRB1, ATN1, CAS…	330	2170	16650	1.65082	0.0751648	0.0129389	0.0353591
GOTERM_BP_FAT	GO:0000904~cell morphogenesis involved in differentiation	28	6.25	0.00212543	SRCIN1, MYO7A, PTEN, CITED1, ALCAM, ARX, SLC1A3, LAMB2, DAB1, UNC5D, NFATC4, SEMA3A, LRFN5, KIF13B, RAP2A, ERG, DAB2IP, ZNF280D, FZD3, CTNNA2, SEMA6A, SLITRK3, NEDD4, ITGB1BP1, RBPJ, APBB2, EXT1, PHLDB2	330	753	16650	1.87613	0.999844	0.490411	3.88885
GOTERM_BP_FAT	GO:0030182~neuron differentiation	40	8.92857	0.00214298	SRCIN1, FRYL, MYO7A, PTEN, ARX, ALCAM, DAB1, SLC1A3, LAMB2, CRB1, ATXN10, NFATC4, UNC5D, SEMA3A, BRINP3, LRFN5, GBA, NR2F1, KIF13B, RAP2A, DIXDC1, DAB2IP, EMX1, ZNF280D, AIFM1, MINOS1-NBL1, MDGA1, MDGA2, FZD3, CTNNA2, NOTCH3, SEMA6A, SLC4A10, SLITRK3, TRAPPC9, NEDD4, CNTN1, RBPJ, EXT1, APBB2	330	1226	16650	1.64615	0.999855	0.468032	3.92036
GOTERM_BP_FAT	GO:0048699~generation of neurons	43	9.59821	0.00247928	SRCIN1, FRYL, MYO7A, SOX5, ASTN1, PTEN, ARX, ALCAM, DAB1, LAMB2, SLC1A3, CRB1, ATXN10, CASZ1, NFATC4, UNC5D, SEMA3A, BRINP3, LRFN5, GBA, NR2F1, KIF13B, RAP2A, DIXDC1, DAB2IP, ZNF280D, EMX1, AIFM1, MINOS1-NBL1, MDGA1, MDGA2, FZD3, CTNNA2, NOTCH3, SEMA6A, SLC4A10, SLITRK3, TRAPPC9, NEDD4, CNTN1, RBPJ, EXT1, APBB2	330	1357	16650	1.59878	0.999964	0.472207	4.52222
GOTERM_BP_FAT	GO:0022008~neurogenesis	44	9.82143	0.0045395	SRCIN1, FRYL, MYO7A, SOX5, ASTN1, PTEN, ARX, ALCAM, DAB1, LAMB2, SLC1A3, CRB1, ATXN10, CASZ1, NFATC4, UNC5D, SEMA3A, BRINP3, LRFN5, GBA, NR2F1, KIF13B, RAP2A, DIXDC1, DAB2IP, ZNF280D, EMX1, AIFM1, MINOS1-NBL1, FA2H, MDGA1, MDGA2, FZD3, CTNNA2, NOTCH3, SEMA6A, SLC4A10, SLITRK3, TRAPPC9, NEDD4, CNTN1, RBPJ, EXT1, APBB2	330	1447	16650	1.53421	1	0.608213	8.13214
GOTERM_BP_FAT	GO:0000902~cell morphogenesis	39	8.70536	0.00468533	SHROOM3, SRCIN1, FRYL, MYO7A, C5ORF42, PTEN, CITED1, ARX, ACTR3, ALCAM, DAB1, SLC1A3, LAMB2, ATXN10, MKKS, NFATC4, UNC5D, SEMA3A, LRFN5, TBC1D1, CDC42EP3, KIF13B, RAP2A, DAB2IP, ERG, EMX1, ZNF280D, MINOS1-NBL1, FZD3, CTNNA2, SEMA6A, SLITRK3, NEDD4, FNBP1L, ITGB1BP1, RBPJ, EXT1, APBB2, PHLDB2	330	1240	16650	1.58688	1	0.601941	8.38271
GOTERM_BP_FAT	GO:0048666~neuron development	32	7.14286	0.00533794	SRCIN1, FRYL, MYO7A, PTEN, ARX, ALCAM, SLC1A3, LAMB2, DAB1, CRB1, ATXN10, UNC5D, NFATC4, SEMA3A, LRFN5, GBA, NR2F1, KIF13B, RAP2A, DAB2IP, EMX1, ZNF280D, MINOS1-NBL1, FZD3, CTNNA2, SEMA6A, SLC4A10, SLITRK3, NEDD4, CNTN1, APBB2, EXT1	330	965	16650	1.6731	1	0.600914	9.49612
GOTERM_BP_FAT	GO:0030030~cell projection organization	40	8.92857	0.00592314	SRCIN1, FRYL, MYO7A, ARPC5, C5ORF42, PTEN, ARX, ACTR3, ALCAM, DAB1, LAMB2, ATXN10, PLS1, MKKS, NFATC4, UNC5D, SEMA3A, LRFN5, TBC1D1, CDC42EP3, GBA, NR2F1, KIF13B, NPHP1, RAP2B, RAP2A, DAB2IP, ZNF280D, EMX1, MINOS1-NBL1, FZD3, CTNNA2, SEMA6A, SLITRK3, NEDD4, FNBP1L, TSGA10, CNTN1, EXT1, APBB2	330	1301	16650	1.55125	1	0.609822	10.4836
GOTERM_BP_FAT	GO:0031175~neuron projection development	28	6.25	0.00628404	SRCIN1, FRYL, PTEN, ALCAM, ARX, LAMB2, DAB1, ATXN10, UNC5D, NFATC4, SEMA3A, LRFN5, GBA, KIF13B, NR2F1, RAP2A, DAB2IP, EMX1, ZNF280D, MINOS1-NBL1, FZD3, CTNNA2, SEMA6A, SLITRK3, NEDD4, CNTN1, APBB2, EXT1	330	817	16650	1.72916	1	0.617754	11.0875
GOTERM_BP_FAT	GO:0032989~cellular component morphogenesis	40	8.92857	0.0077148	SHROOM3, SRCIN1, FRYL, MYO7A, C5ORF42, PTEN, CITED1, ARX, ACTR3, ALCAM, DAB1, SLC1A3, LAMB2, ATXN10, KRT8, MKKS, NFATC4, UNC5D, SEMA3A, LRFN5, TBC1D1, CDC42EP3, KIF13B, RAP2A, DAB2IP, ERG, EMX1, ZNF280D, MINOS1-NBL1, FZD3, CTNNA2, SEMA6A, SLITRK3, NEDD4, FNBP1L, ITGB1BP1, RBPJ, EXT1, APBB2, PHLDB2	330	1321	16650	1.52777	1	0.679958	13.444
GOTERM_BP_FAT	GO:0048667~cell morphogenesis involved in neuron differentiation	19	4.24107	0.0100168	ZNF280D, SRCIN1, MYO7A, FZD3, PTEN, CTNNA2, ALCAM, ARX, SEMA6A, SLITRK3, LAMB2, DAB1, SLC1A3, NFATC4, UNC5D, SEMA3A, LRFN5, APBB2, EXT1	330	496	16650	1.93273	1	0.664201	17.1117
GOTERM_BP_FAT	GO:0048812~neuron projection morphogenesis	20	4.46429	0.0118292	DAB2IP, ZNF280D, SRCIN1, EMX1, MINOS1-NBL1, FZD3, PTEN, CTNNA2, ALCAM, ARX, SEMA6A, SLITRK3, LAMB2, DAB1, NFATC4, UNC5D, SEMA3A, LRFN5, APBB2, EXT1	330	543	16650	1.85836	1	0.65546	19.8955
GOTERM_BP_FAT	GO:0048468~cell development	53	11.8304	0.0175343	SRCIN1, MYO7A, LGR5, PTEN, LSR, CITED1, SHB, DAB1, SLC1A3, ATXN10, MKKS, UNC5D, SEMA3A, BRINP3, KIF13B, NR2F1, RAP2B, RAP2A, DAB2IP, EMX1, ZNF280D, MINOS1-NBL1, FA2H, PDE4D, CTNNA2, SLITRK3, INHBE, ITGB1BP1, CNTN1, EXT1, SHROOM3, FRYL, ARX, ALCAM, LAMB2, CRB1, KRT8, CASZ1, NFATC4, LRFN5, GBA, DIXDC1, ERG, LMNA, FZD3, ANXA2, NOTCH3, SEMA6A, SLC4A10, NEDD4, APBB2, RBPJ, PHLDB2	330	1968	16650	1.35879	1	0.703113	28.0916
GOTERM_BP_FAT	GO:0048858~cell projection morphogenesis	25	5.58036	0.0271012	DAB2IP, EMX1, ZNF280D, SRCIN1, MINOS1-NBL1, FZD3, C5ORF42, PTEN, CTNNA2, ALCAM, ARX, ACTR3, SEMA6A, SLITRK3, LAMB2, DAB1, FNBP1L, ATXN10, MKKS, NFATC4, UNC5D, SEMA3A, LRFN5, APBB2, EXT1	330	797	16650	1.58264	1	0.752703	40.0823
GOTERM_BP_FAT	GO:0007411~axon guidance	10	2.23214	0.033541	ALCAM, ARX, SEMA6A, LAMB2, ZNF280D, UNC5D, FZD3, SEMA3A, EXT1, APBB2	330	223	16650	2.26254	1	0.77574	47.0597
GOTERM_BP_FAT	GO:0032990~cell part morphogenesis	25	5.58036	0.0341248	DAB2IP, EMX1, ZNF280D, SRCIN1, MINOS1-NBL1, FZD3, C5ORF42, PTEN, CTNNA2, ALCAM, ARX, ACTR3, SEMA6A, SLITRK3, LAMB2, DAB1, FNBP1L, ATXN10, MKKS, NFATC4, UNC5D, SEMA3A, LRFN5, APBB2, EXT1	330	817	16650	1.5439	1	0.774567	47.6527
GOTERM_BP_FAT	GO:0097485~neuron projection guidance	10	2.23214	0.0346622	ALCAM, ARX, SEMA6A, LAMB2, ZNF280D, UNC5D, FZD3, SEMA3A, EXT1, APBB2	330	224	16650	2.25244	1	0.772981	48.193
GOTERM_BP_FAT	GO:0007409~axonogenesis	15	3.34821	0.0356829	ZNF280D, FZD3, PTEN, CTNNA2, ALCAM, ARX, SEMA6A, LAMB2, DAB1, SLITRK3, UNC5D, SEMA3A, LRFN5, EXT1, APBB2	330	413	16650	1.83249	1	0.776119	49.2047
GOTERM_BP_FAT	GO:0010769~regulation of cell morphogenesis involved in differentiation	13	2.90179	0.0376108	SEMA6A, RAP2A, DAB2IP, DAB1, SRCIN1, NEDD4, ITGB1BP1, NFATC4, SEMA3A, PTEN, PHLDB2, CITED1, KIF13B	330	339	16650	1.93484	1	0.784131	51.0648
GOTERM_BP_FAT	GO:0051960~regulation of nervous system development	23	5.13393	0.0534995	DIXDC1, RAP2A, DAB2IP, EMX1, SRCIN1, MINOS1-NBL1, FZD3, PTEN, GLI1, NOTCH3, SEMA6A, SLITRK3, DAB1, NEDD4, CASZ1, CNTN1, NFATC4, UNC5D, SEMA3A, ADGRL1, BRINP3, NR2F1, KIF13B	330	769	16650	1.50904	1	0.817835	64.121
GOTERM_BP_FAT	GO:0061564~axon development	15	3.34821	0.0595482	ZNF280D, FZD3, PTEN, CTNNA2, ALCAM, ARX, SEMA6A, LAMB2, DAB1, SLITRK3, UNC5D, SEMA3A, LRFN5, EXT1, APBB2	330	445	16650	1.70072	1	0.831511	68.1628
GOTERM_BP_FAT	GO:0060284~regulation of cell development	24	5.35714	0.0800102	DIXDC1, RAP2A, DAB2IP, EMX1, SRCIN1, MINOS1-NBL1, FZD3, PTEN, CITED1, NOTCH3, SHB, SEMA6A, DAB1, NEDD4, ITGB1BP1, CASZ1, CNTN1, NFATC4, UNC5D, SEMA3A, BRINP3, PHLDB2, NR2F1, KIF13B	330	851	16650	1.42292	1	0.86269	78.8731
GOTERM_BP_FAT	GO:0050767~regulation of neurogenesis	20	4.46429	0.0839533	DIXDC1, RAP2A, DAB2IP, SRCIN1, EMX1, MINOS1-NBL1, FZD3, PTEN, NOTCH3, SEMA6A, DAB1, NEDD4, CASZ1, CNTN1, NFATC4, UNC5D, SEMA3A, BRINP3, KIF13B, NR2F1	330	682	16650	1.47961	1	0.859559	80.4988
GOTERM_BP_FAT	GO:0045664~regulation of neuron differentiation	17	3.79464	0.0895475	DIXDC1, RAP2A, DAB2IP, SRCIN1, MINOS1-NBL1, PTEN, NOTCH3, SEMA6A, DAB1, NEDD4, CASZ1, CNTN1, NFATC4, SEMA3A, BRINP3, KIF13B, NR2F1	330	560	16650	1.53166	1	0.87056	82.6033
GOTERM_BP_FAT	GO:0022604~regulation of cell morphogenesis	17	3.79464	0.0987438	RAP2A, DAB2IP, SHROOM3, SRCIN1, ZMYM3, PTEN, CITED1, SEMA6A, DAB1, NEDD4, ITGB1BP1, NFATC4, SEMA3A, TBC1D1, PHLDB2, CDC42EP3, KIF13B	330	568	16650	1.51008	1	0.874921	85.603
GOTERM_BP_FAT	GO:0022603~regulation of anatomical structure morphogenesis	26	5.80357	0.193866	RAP2A, DAB2IP, ERG, SHROOM3, SRCIN1, ZMYM3, FZD3, PTEN, ZNRF3, CITED1, GLI1, FOXP2, GPC4, SEMA6A, DAB1, NEDD4, ITGB1BP1, PSMD1, UBC, NFATC4, SEMA3A, RBPJ, TBC1D1, CDC42EP3, PHLDB2, KIF13B	330	1051	16650	1.24816	1	0.941339	98.2002
GOTERM_BP_FAT	GO:0010975~regulation of neuron projection development	12	2.67857	0.195969	RAP2A, SEMA6A, DAB2IP, DAB1, SRCIN1, NEDD4, CNTN1, NFATC4, SEMA3A, PTEN, KIF13B, NR2F1	330	413	16650	1.46599	1	0.941757	98.2858
GOTERM_BP_FAT	GO:0045595~regulation of cell differentiation	35	7.8125	0.284379	SRCIN1, SOX5, NFKB1, PTEN, DDR2, CITED1, GLI1, SHB, DAB1, CASZ1, UNC5D, NFATC4, FBN2, SEMA3A, BRINP3, PLCB1, AP3B1, NR2F1, KIF13B, ZBTB7B, RAP2A, DIXDC1, DAB2IP, EMX1, MINOS1-NBL1, FZD3, CTNNA2, NOTCH3, SEMA6A, NEDD4, ITGB1BP1, CNTN1, ZFPM2, RBPJ, PHLDB2	330	1544	16650	1.14372	1	0.965034	99.8046
GOTERM_BP_FAT	GO:0006935~chemotaxis	14	3.125	0.298941	ZNF280D, IL16, MINOS1-NBL1, FZD3, PDE4D, ALCAM, ARX, SEMA6A, LAMB2, PLA2G6, UNC5D, SEMA3A, EXT1, APBB2	330	552	16650	1.27964	1	0.968521	99.8668
GOTERM_BP_FAT	GO:0042330~taxis	14	3.125	0.29971	ZNF280D, IL16, MINOS1-NBL1, FZD3, PDE4D, ALCAM, ARX, SEMA6A, LAMB2, PLA2G6, UNC5D, SEMA3A, EXT1, APBB2	330	553	16650	1.27733	1	0.9686	99.8695
GOTERM_BP_FAT	GO:0009605~response to external stimulus	39	8.70536	0.715771	SHROOM3, GCLC, IL16, NFKB1, SGMS1, PTEN, CITED1, ARX, ALCAM, SLC1A3, LAMB2, KRT8, SLC2A1, TGM2, MGLL, MKKS, UNC5D, SEMA3A, GBA, DAB2IP, CYP1A1, ZNF280D, AIFM1, MINOS1-NBL1, PDE4D, FZD3, FGF21, RPTOR, ANXA2, CTNNA2, FOXP2, SEMA6A, EYS, PLA2G6, RBPJ, EXT1, APBB2, GBP3, PHLDB2	330	2073	16650	0.949217	1	0.997716	100
Annotation Cluster 7	Enrichment Score: 1.4909630086822272
Category	Term	Count	%	PValue	Genes	List Total	Pop Hits	Pop Total	Fold Enrichment	Bonferroni	Benjamini	FDR
GOTERM_CC_FAT	GO:0043296~apical junction complex	8	1.78571	0.0158142	RAP2B, SHROOM3, CLMP, TBCD, TJP3, NHS, KIFC3, NPHP1	290	131	14527	3.05912	0.999601	0.428254	20.4644
GOTERM_CC_FAT	GO:0070160~occluding junction	7	1.5625	0.0283646	RAP2B, CLMP, TBCD, TJP3, NHS, LSR, NPHP1	290	116	14527	3.02286	0.999999	0.473865	33.8542
GOTERM_CC_FAT	GO:0005923~bicellular tight junction	6	1.33929	0.0750388	RAP2B, CLMP, TBCD, TJP3, NHS, NPHP1	290	113	14527	2.65981	1	0.733046	67.3855
Annotation Cluster 8	Enrichment Score: 1.4437906593763146
Category	Term	Count	%	PValue	Genes	List Total	Pop Hits	Pop Total	Fold Enrichment	Bonferroni	Benjamini	FDR
GOTERM_CC_FAT	GO:0005938~cell cortex	12	2.67857	0.010681	NUMA1, FNBP1L, NEDD4, FRYL, MYO7A, SLC2A1, PLS1, ASTN2, CAPN2, PCLO, PHLDB2, ANXA2	290	247	14527	2.43367	0.99487	0.3808	14.2937
GOTERM_CC_FAT	GO:0099568~cytoplasmic region	13	2.90179	0.0168117	FRYL, MYO7A, ASTN2, CAPN2, PCLO, ANXA2, NUMA1, NEDD4, FNBP1L, SLC2A1, PLS1, PHLDB2, AP3B1	290	299	14527	2.17796	0.999758	0.425917	21.6144
GOTERM_CC_FAT	GO:0044448~cell cortex part	5	1.11607	0.259659	SLC2A1, PLS1, CAPN2, PCLO, PHLDB2	290	130	14527	1.92666	1	0.860294	98.6678
Annotation Cluster 9	Enrichment Score: 1.3757522443676489
Category	Term	Count	%	PValue	Genes	List Total	Pop Hits	Pop Total	Fold Enrichment	Bonferroni	Benjamini	FDR
GOTERM_CC_FAT	GO:0030054~cell junction	50	11.1607	4.2907e-05	SRCIN1, GRIK1, SYT5, SYT7, DDR2, LSR, KIFC3, ACTR3, SLC2A1, DLG2, LRRC7, SCAMP1, RAP2B, DAB2IP, CLMP, CNTNAP4, PTPRR, PCDH9, PCLO, CTNNA2, FNBP1L, XIRP2, ITGB1BP1, TBCD, SHROOM3, ARPC5, NHS, ALCAM, GPHN, ATN1, KRT8, RPL8, SYN2, TGM2, RPL5, PLEC, NPHP1, DIXDC1, HIST1H3J, BAIAP2L2, SYNPO2, CAPN2, ANXA2, NOTCH3, EPS15, CADPS, KCNJ4, ADGRL1, TJP3, PHLDB2	290	1379	14527	1.81628	0.0208474	0.0208474	0.0616124
GOTERM_CC_FAT	GO:0005912~adherens junction	26	5.80357	0.00305853	SHROOM3, SRCIN1, ARPC5, NHS, DDR2, KIFC3, ALCAM, ACTR3, RPL8, TGM2, RPL5, NPHP1, PLEC, DIXDC1, HIST1H3J, DAB2IP, SYNPO2, CAPN2, ANXA2, CTNNA2, EPS15, NOTCH3, FNBP1L, ITGB1BP1, TBCD, PHLDB2	290	694	14527	1.87669	0.777769	0.313404	4.30449
GOTERM_CC_FAT	GO:0070161~anchoring junction	26	5.80357	0.00418314	SHROOM3, SRCIN1, ARPC5, NHS, DDR2, KIFC3, ALCAM, ACTR3, RPL8, TGM2, RPL5, NPHP1, PLEC, DIXDC1, HIST1H3J, DAB2IP, SYNPO2, CAPN2, ANXA2, CTNNA2, EPS15, NOTCH3, FNBP1L, ITGB1BP1, TBCD, PHLDB2	290	711	14527	1.83182	0.87232	0.337441	5.84342
GOTERM_CC_FAT	GO:0005911~cell-cell junction	23	5.13393	0.0097231	RAP2B, HIST1H3J, DAB2IP, SHROOM3, CLMP, BAIAP2L2, PCDH9, NHS, LSR, ANXA2, KIFC3, CTNNA2, NOTCH3, EPS15, ACTR3, FNBP1L, TBCD, KRT8, SLC2A1, TJP3, PHLDB2, PLEC, NPHP1	290	644	14527	1.78904	0.991749	0.413185	13.0939
GOTERM_CC_FAT	GO:0005913~cell-cell adherens junction	10	2.23214	0.217534	NOTCH3, EPS15, HIST1H3J, DAB2IP, FNBP1L, PHLDB2, ANXA2, CTNNA2, PLEC, KIFC3	290	332	14527	1.50883	1	0.856677	97.0503
GOTERM_MF_FAT	GO:0098641~cadherin binding involved in cell-cell adhesion	9	2.00893	0.237113	NOTCH3, EPS15, HIST1H3J, DAB2IP, FNBP1L, PHLDB2, ANXA2, CTNNA2, PLEC	315	290	15478	1.52493	1	0.918584	98.4273
GOTERM_MF_FAT	GO:0098632~protein binding involved in cell-cell adhesion	9	2.00893	0.268235	NOTCH3, EPS15, HIST1H3J, DAB2IP, FNBP1L, PHLDB2, ANXA2, CTNNA2, PLEC	315	301	15478	1.4692	1	0.923156	99.1699
GOTERM_MF_FAT	GO:0098631~protein binding involved in cell adhesion	9	2.00893	0.282789	NOTCH3, EPS15, HIST1H3J, DAB2IP, FNBP1L, PHLDB2, ANXA2, CTNNA2, PLEC	315	306	15478	1.44519	1	0.929286	99.3901
GOTERM_MF_FAT	GO:0045296~cadherin binding	9	2.00893	0.286938	NOTCH3, EPS15, HIST1H3J, DAB2IP, FNBP1L, PHLDB2, ANXA2, CTNNA2, PLEC	315	307	15478	1.44048	1	0.930655	99.442
GOTERM_MF_FAT	GO:0050839~cell adhesion molecule binding	12	2.67857	0.334414	NOTCH3, EPS15, HIST1H3J, DAB2IP, LAMB2, FNBP1L, ITGB1BP1, ADGRL1, PHLDB2, ANXA2, CTNNA2, PLEC	315	461	15478	1.27904	1	0.931533	99.8061
GOTERM_BP_FAT	GO:0098609~cell-cell adhesion	26	5.80357	0.367152	ASTN1, KIFC3, ALCAM, SHB, DAB1, UNC5D, PLEC, NPHP1, KIF13B, AP3B1, ZBTB7B, RAP2B, HIST1H3J, DAB2IP, PCDH9, ANXA2, CTNNA2, EPS15, NOTCH3, ATP2C1, FNBP1L, NEDD4, CDH18, ADGRL1, PHLDB2, CDH10	330	1164	16650	1.12699	1	0.978129	99.9802
Annotation Cluster 10	Enrichment Score: 1.3020159456583529
Category	Term	Count	%	PValue	Genes	List Total	Pop Hits	Pop Total	Fold Enrichment	Bonferroni	Benjamini	FDR
GOTERM_BP_FAT	GO:0071363~cellular response to growth factor stimulus	23	5.13393	0.00504295	DDC, DAB2IP, GCLC, FUT8, MINOS1-NBL1, SOX5, FGF21, KIF16B, CITED1, NEDD4, ITGB1BP1, RPL8, UBC, SPRED2, PDE8A, FBN2, ADAMTS3, RBPJ, MYOF, INSR, USP15, WWOX, BCL9	330	610	16650	1.90238	1	0.595625	8.99444
GOTERM_BP_FAT	GO:0070848~response to growth factor	23	5.13393	0.00772016	DDC, DAB2IP, GCLC, FUT8, MINOS1-NBL1, SOX5, FGF21, KIF16B, CITED1, NEDD4, ITGB1BP1, RPL8, UBC, SPRED2, PDE8A, FBN2, ADAMTS3, RBPJ, MYOF, INSR, USP15, WWOX, BCL9	330	634	16650	1.83037	1	0.66739	13.4527
GOTERM_BP_FAT	GO:0071495~cellular response to endogenous stimulus	36	8.03571	0.0110829	GCLC, FUT8, UBE3A, SOX5, NFKB1, CITED1, IGF1R, PGRMC2, RPL8, SPRED2, MKKS, PDE8A, FBN2, USP15, INSR, WWOX, BCL9, NR2F1, DDC, DAB2IP, TRIP4, BAIAP2L2, AIFM1, MINOS1-NBL1, PDE4D, ARID1A, HNF4G, FGF21, KIF16B, CAPN2, RPTOR, NEDD4, ITGB1BP1, UBC, RBPJ, NR5A2	330	1185	16650	1.5328	1	0.673604	18.7601
GOTERM_BP_FAT	GO:0009719~response to endogenous stimulus	39	8.70536	0.0949324	GCLC, FUT8, UBE3A, SOX5, NFKB1, PTEN, CITED1, IGF1R, PGRMC2, RPL8, SPRED2, MKKS, PDE8A, FBN2, USP15, INSR, WWOX, BCL9, GBA, NR2F1, DDC, DAB2IP, TRIP4, BAIAP2L2, AIFM1, MINOS1-NBL1, PDE4D, ARID1A, HNF4G, FGF21, KIF16B, CAPN2, RPTOR, ANXA2, NEDD4, ITGB1BP1, UBC, RBPJ, NR5A2	330	1548	16650	1.27114	1	0.870496	84.4246
GOTERM_BP_FAT	GO:0071310~cellular response to organic substance	52	11.6071	0.115654	NFKB1, SGMS1, CITED1, PSMD1, PGRMC2, SPRED2, MKKS, PDE8A, BRINP3, PLCB1, INSR, USP15, WWOX, NR2F1, DDC, DAB2IP, CYP1A1, AIFM1, MINOS1-NBL1, ARID1A, PDE4D, HNF4G, KIF16B, FGF21, RPTOR, ITGB1BP1, FKBP14, UBC, LRRC66, PLA2G6, ADAMTS3, UGGT2, GCLC, FUT8, UBE3A, SOX5, IGF1R, KRT8, RPL8, TGM2, FBN2, MYOF, BCL9, GBA, TRIP4, BAIAP2L2, LMNA, CAPN2, NDOR1, NEDD4, NR5A2, RBPJ	330	2186	16650	1.2002	1	0.896707	89.886
GOTERM_BP_FAT	GO:0070887~cellular response to chemical stimulus	58	12.9464	0.25923	IL16, NFKB1, SGMS1, PTEN, CITED1, PSMD1, PGRMC2, SPRED2, MKKS, PDE8A, BRINP3, PLCB1, INSR, USP15, WWOX, NR2F1, DDC, RAP2A, DAB2IP, CYP1A1, AIFM1, MINOS1-NBL1, PDE4D, ARID1A, HNF4G, KIF16B, FGF21, RPTOR, PPM1E, ITGB1BP1, FKBP14, UBC, PLA2G6, LRRC66, ADAMTS3, UGGT2, KDM6B, GCLC, FUT8, UBE3A, SOX5, IGF1R, KRT8, RPL8, TGM2, NFATC4, FBN2, MYOF, BCL9, GBA, TRIP4, BAIAP2L2, LMNA, CAPN2, NDOR1, NEDD4, RB…	330	2648	16650	1.10512	1	0.960993	99.6279
GOTERM_BP_FAT	GO:0010033~response to organic substance	55	12.2768	0.626128	NFKB1, SGMS1, PTEN, CITED1, PSMD1, PGRMC2, SPRED2, MKKS, PDE8A, BRINP3, PLCB1, INSR, USP15, WWOX, NR2F1, DDC, DAB2IP, CYP1A1, AIFM1, MINOS1-NBL1, ARID1A, PDE4D, HNF4G, KIF16B, FGF21, RPTOR, ITGB1BP1, FKBP14, UBC, PLA2G6, LRRC66, ADAMTS3, UGGT2, GCLC, FUT8, UBE3A, SOX5, IGF1R, KRT8, RPL8, TGM2, FBN2, MYOF, BCL9, GBA, TAF2, TRIP4, BAIAP2L2, LMNA, CAPN2, ANXA2, NDOR1, NEDD4, RBPJ, NR5A2	330	2822	16650	0.983345	1	0.995234	100
Annotation Cluster 11	Enrichment Score: 1.301696881875414
Category	Term	Count	%	PValue	Genes	List Total	Pop Hits	Pop Total	Fold Enrichment	Bonferroni	Benjamini	FDR
GOTERM_BP_FAT	GO:0023051~regulation of signaling	77	17.1875	0.0185341	GRIK1, NFKB1, SYT7, SGMS1, PTEN, LGR5, CITED1, ZNRF3, GLI1, SHB, ARHGAP20, DAB1, SLC1A3, SLC2A1, PSMD1, SPRED2, MGLL, PDE8A, PLCB1, INSR, WWOX, CDK14, ARHGEF3, RAP2A, DAB2IP, ELP2, CNTNAP4, MINOS1-NBL1, PTPRR, PDE4D, FGF21, KIF16B, MECOM, RPTOR, ARHGEF11, GRM5, RALGAPA2, INHBE, ATP2C1, ITGB1BP1, UBC, MNT, TNNI3K, PLA2G6, LRRC66, MCC, ADAMTS3, RALGPS2, GCLC, UBE3A, FPGT-TNNI3K, CXXC5, IGF1R, PLCL1…	330	3070	16650	1.26547	1	0.70002	29.4437
GOTERM_BP_FAT	GO:0048585~negative regulation of response to stimulus	39	8.70536	0.0205378	GCLC, NFKB1, SGMS1, PTEN, ZNRF3, CITED1, GLI1, IGF1R, DAB1, TMEM127, PPP2CB, PSMD1, OTUD7B, SPRED2, MKKS, NFATC4, PDE8A, FBN2, SEMA3A, RTEL1, WWOX, GBA, DAB2IP, MINOS1-NBL1, PTPRR, LMNA, MECOM, ANXA2, CTNNA2, EPS15, SEMA6A, NEDD4, RGS3, ITGB1BP1, MNT, UBC, LRRC66, MCC, PHLDB2	330	1369	16650	1.43735	1	0.715493	32.0811
GOTERM_BP_FAT	GO:0010646~regulation of cell communication	74	16.5179	0.0342804	GRIK1, NFKB1, SYT7, SGMS1, PTEN, LGR5, CITED1, ZNRF3, GLI1, SHB, ARHGAP20, DAB1, SLC1A3, SLC2A1, PSMD1, SPRED2, MGLL, PDE8A, PLCB1, INSR, WWOX, CDK14, ARHGEF3, RAP2A, DAB2IP, ELP2, CNTNAP4, MINOS1-NBL1, PTPRR, PDE4D, FGF21, MECOM, RPTOR, ARHGEF11, GRM5, RALGAPA2, INHBE, ATP2C1, ITGB1BP1, UBC, MNT, PLA2G6, LRRC66, MCC, ADAMTS3, RALGPS2, GCLC, UBE3A, CXXC5, IGF1R, PLCL1, TMEM127, PPP2CB, TGM2, NFAT…	330	3020	16650	1.2363	1	0.772638	47.8096
GOTERM_BP_FAT	GO:0009966~regulation of signal transduction	67	14.9554	0.0431795	NFKB1, SGMS1, PTEN, LGR5, CITED1, ZNRF3, GLI1, SHB, DAB1, ARHGAP20, PSMD1, SPRED2, MGLL, PDE8A, PLCB1, INSR, WWOX, CDK14, ARHGEF3, RAP2A, DAB2IP, ELP2, MINOS1-NBL1, PTPRR, PDE4D, FGF21, MECOM, RPTOR, ARHGEF11, RALGAPA2, INHBE, ATP2C1, ITGB1BP1, UBC, MNT, PLA2G6, LRRC66, MCC, ADAMTS3, RALGPS2, GCLC, UBE3A, CXXC5, IGF1R, TMEM127, PPP2CB, NFAT5, TGM2, OTUD7B, NFATC4, FBN2, MYOF, BCL9, GBA, TAF2, DIX…	330	2728	16650	1.23917	1	0.794222	56.0825
GOTERM_BP_FAT	GO:0009968~negative regulation of signal transduction	30	6.69643	0.062542	GCLC, SGMS1, PTEN, CITED1, ZNRF3, GLI1, IGF1R, TMEM127, DAB1, PPP2CB, PSMD1, SPRED2, OTUD7B, NFATC4, FBN2, WWOX, GBA, DAB2IP, MINOS1-NBL1, LMNA, PTPRR, MECOM, EPS15, NEDD4, RGS3, ITGB1BP1, MNT, UBC, LRRC66, MCC	330	1089	16650	1.38993	1	0.842346	70.0001
GOTERM_BP_FAT	GO:0010648~negative regulation of cell communication	31	6.91964	0.0947935	GCLC, SGMS1, PTEN, CITED1, ZNRF3, GLI1, IGF1R, TMEM127, DAB1, PPP2CB, PSMD1, SPRED2, OTUD7B, NFATC4, FBN2, WWOX, GBA, DAB2IP, MINOS1-NBL1, PTPRR, LMNA, MECOM, EPS15, NEDD4, RGS3, ITGB1BP1, MNT, UBC, LRRC66, PLA2G6, MCC	330	1182	16650	1.32326	1	0.872725	84.38
GOTERM_BP_FAT	GO:0023057~negative regulation of signaling	31	6.91964	0.0988206	GCLC, SGMS1, PTEN, CITED1, ZNRF3, GLI1, IGF1R, TMEM127, DAB1, PPP2CB, PSMD1, SPRED2, OTUD7B, NFATC4, FBN2, WWOX, GBA, DAB2IP, MINOS1-NBL1, PTPRR, LMNA, MECOM, EPS15, NEDD4, RGS3, ITGB1BP1, MNT, UBC, LRRC66, PLA2G6, MCC	330	1186	16650	1.3188	1	0.873872	85.6258
GOTERM_BP_FAT	GO:1902532~negative regulation of intracellular signal transduction	14	3.125	0.11689	IGF1R, DAB2IP, TMEM127, DAB1, RGS3, ITGB1BP1, PPP2CB, PTPRR, SPRED2, OTUD7B, LRRC66, MECOM, PTEN, GBA	330	454	16650	1.55587	1	0.897268	90.1465
Annotation Cluster 12	Enrichment Score: 1.295789757146126
Category	Term	Count	%	PValue	Genes	List Total	Pop Hits	Pop Total	Fold Enrichment	Bonferroni	Benjamini	FDR
GOTERM_BP_FAT	GO:0060074~synapse maturation	4	0.892857	0.00585746	DAB2IP, NFATC4, ADGRL1, PTEN	330	19	16650	10.622	1	0.620125	10.3733
GOTERM_BP_FAT	GO:0090128~regulation of synapse maturation	3	0.669643	0.0262971	DAB2IP, NFATC4, ADGRL1	330	13	16650	11.6434	1	0.755191	39.1524
GOTERM_BP_FAT	GO:0016358~dendrite development	9	2.00893	0.035385	RAP2A, DAB2IP, DAB1, SRCIN1, NEDD4, NFATC4, SEMA3A, PTEN, CTNNA2	330	190	16650	2.38995	1	0.776626	48.9113
GOTERM_BP_FAT	GO:0050808~synapse organization	10	2.23214	0.0404436	DAB2IP, GPHN, SLITRK3, LAMB2, NEDD4, NFATC4, ADGRL1, PTEN, PCLO, CTNNA2	330	231	16650	2.18418	1	0.789883	53.6815
GOTERM_BP_FAT	GO:0050807~regulation of synapse organization	6	1.33929	0.0778877	DAB2IP, SLITRK3, NEDD4, NFATC4, ADGRL1, CTNNA2	330	115	16650	2.63241	1	0.858185	77.9457
GOTERM_BP_FAT	GO:0050803~regulation of synapse structure or activity	9	2.00893	0.0988367	GRM5, DAB2IP, SLITRK3, NEDD4, NFATC4, ADGRL1, SYT7, PTEN, CTNNA2	330	237	16650	1.916	1	0.872656	85.6306
GOTERM_BP_FAT	GO:0021700~developmental maturation	6	1.33929	0.500954	SHB, DAB2IP, NFATC4, ADGRL1, RBPJ, PTEN	330	236	16650	1.28274	1	0.988591	99.9998
Annotation Cluster 13	Enrichment Score: 1.2324254647945099
Category	Term	Count	%	PValue	Genes	List Total	Pop Hits	Pop Total	Fold Enrichment	Bonferroni	Benjamini	FDR
GOTERM_BP_FAT	GO:0060429~epithelium development	33	7.36607	0.0112053	RAD51B, SHROOM3, MYO7A, FN3K, C5ORF42, LGR5, ZNRF3, CITED1, GLI1, ARX, GPC4, NUMA1, LAMB2, PSMD1, TGM2, MKKS, NFATC4, SEMA3A, IPMK, RAP2B, RAP2A, CYP1A1, EMX1, FA2H, PDE4D, ARID1A, FZD3, FOXP2, UBC, RBPJ, NR5A2, PHLDB2, KDM6B	330	1060	16650	1.57075	1	0.660208	18.9473
GOTERM_BP_FAT	GO:0048729~tissue morphogenesis	21	4.6875	0.0230087	RAP2A, SHROOM3, FZD3, ARID1A, C5ORF42, LGR5, ZNRF3, CITED1, GPC4, XIRP2, PSMD1, TGM2, UBC, MKKS, ZFPM2, NFATC4, SEMA3A, RBPJ, IPMK, PHLDB2, KDM6B	330	622	16650	1.70345	1	0.735963	35.2052
GOTERM_BP_FAT	GO:0002009~morphogenesis of an epithelium	18	4.01786	0.0302776	RAP2A, SHROOM3, FZD3, ARID1A, C5ORF42, LGR5, CITED1, ZNRF3, GPC4, PSMD1, TGM2, UBC, MKKS, NFATC4, SEMA3A, RBPJ, IPMK, PHLDB2	330	521	16650	1.74315	1	0.762858	43.626
GOTERM_BP_FAT	GO:0035295~tube development	19	4.24107	0.0399967	DAB2IP, CLMP, SHROOM3, CYP1A1, FZD3, ARID1A, LGR5, CITED1, FOXP2, GLI1, NUMA1, DAB1, ITGB1BP1, TGM2, MKKS, ZFPM2, NFATC4, RBPJ, IPMK	330	580	16650	1.65282	1	0.79223	53.2777
GOTERM_BP_FAT	GO:0035239~tube morphogenesis	13	2.90179	0.0444544	DAB2IP, SHROOM3, ITGB1BP1, TGM2, MKKS, NFATC4, ARID1A, FZD3, RBPJ, IPMK, LGR5, CITED1, GLI1	330	348	16650	1.8848	1	0.792779	57.1606
GOTERM_BP_FAT	GO:0060562~epithelial tube morphogenesis	9	2.00893	0.268293	SHROOM3, MKKS, NFATC4, ARID1A, FZD3, RBPJ, IPMK, LGR5, CITED1	330	309	16650	1.46955	1	0.961194	99.7042
GOTERM_BP_FAT	GO:0007389~pattern specification process	9	2.00893	0.633923	SHROOM3, EMX1, MINOS1-NBL1, MKKS, NFATC4, SEMA3A, RBPJ, CITED1, GLI1	330	436	16650	1.04149	1	0.995468	100
Annotation Cluster 14	Enrichment Score: 1.1952438476281653
Category	Term	Count	%	PValue	Genes	List Total	Pop Hits	Pop Total	Fold Enrichment	Bonferroni	Benjamini	FDR
GOTERM_BP_FAT	GO:0048589~developmental growth	21	4.6875	0.0119408	RAD51B, EMX1, UBE3A, CPQ, PDE4D, PTEN, DDR2, ALCAM, ARX, SEMA6A, SLC4A10, LAMB2, EYS, PLS1, MKKS, ZFPM2, SEMA3A, RBPJ, PLCB1, INSR, BCL9	330	583	16650	1.8174	1	0.651029	20.0639
GOTERM_BP_FAT	GO:0040007~growth	28	6.25	0.0301443	RAD51B, UBE3A, CPQ, OSGIN1, SGMS1, PTEN, DDR2, ALCAM, ARX, LAMB2, PLS1, MKKS, SEMA3A, PLCB1, INSR, BCL9, EMX1, PDE4D, RPTOR, ARHGEF11, FOXP2, SEMA6A, SLC4A10, EYS, PAPPA2, ZFPM2, RBPJ, APBB2	330	932	16650	1.5158	1	0.765225	43.4814
GOTERM_BP_FAT	GO:0048638~regulation of developmental growth	10	2.23214	0.147707	ARX, SEMA6A, PLS1, MKKS, ZFPM2, SEMA3A, RBPJ, PLCB1, PTEN, INSR	330	303	16650	1.66517	1	0.919725	94.9182
GOTERM_BP_FAT	GO:0040008~regulation of growth	16	3.57143	0.311447	DAB2IP, OSGIN1, PTEN, RPTOR, ARHGEF11, ARX, SEMA6A, PLS1, MKKS, PAPPA2, ZFPM2, SEMA3A, RBPJ, PLCB1, APBB2, INSR	330	652	16650	1.23815	1	0.968137	99.9048
Annotation Cluster 15	Enrichment Score: 1.0891686143135741
Category	Term	Count	%	PValue	Genes	List Total	Pop Hits	Pop Total	Fold Enrichment	Bonferroni	Benjamini	FDR
GOTERM_CC_FAT	GO:0098791~Golgi subcompartment	13	2.90179	0.0184756	STX6, SCAMP1, NMNAT2, FUT8, FUT10, SGMS1, LGR5, DPY30, TRAPPC9, PLEKHA8, ATP2C1, FNBP1L, FUT1	290	303	14527	2.14921	0.999894	0.435758	23.4984
GOTERM_CC_FAT	GO:0031984~organelle subcompartment	13	2.90179	0.028155	STX6, SCAMP1, NMNAT2, FUT8, FUT10, SGMS1, LGR5, DPY30, TRAPPC9, PLEKHA8, ATP2C1, FNBP1L, FUT1	290	322	14527	2.02239	0.999999	0.487131	33.6489
GOTERM_CC_FAT	GO:0005802~trans-Golgi network	9	2.00893	0.046914	SCAMP1, STX6, DPY30, NMNAT2, PLEKHA8, TRAPPC9, FNBP1L, ATP2C1, LGR5	290	200	14527	2.25419	1	0.625823	49.8512
GOTERM_CC_FAT	GO:0044431~Golgi apparatus part	23	5.13393	0.199405	STX6, SCAMP1, NMNAT2, FUT8, FUT10, PPP6R1, SGMS1, LGR5, GLCE, NOTCH3, GPC4, DPY30, NUMA1, STX12, PLEKHA8, TRAPPC9, FNBP1L, ATP2C1, SLC2A1, GALNTL6, FUT1, EXT1, GBP3	290	910	14527	1.26609	1	0.862678	95.9012
GOTERM_CC_FAT	GO:0000139~Golgi membrane	18	4.01786	0.220861	STX6, NMNAT2, FUT8, FUT10, PPP6R1, SGMS1, LGR5, GLCE, NOTCH3, NUMA1, STX12, TRAPPC9, ATP2C1, SLC2A1, GALNTL6, FUT1, EXT1, GBP3	290	699	14527	1.28995	1	0.852604	97.2254
GOTERM_CC_FAT	GO:0005794~Golgi apparatus	34	7.58929	0.271442	FUT8, CPQ, PPP6R1, SGMS1, LGR5, KIFC3, GPC4, DPY30, NUMA1, STX12, SLC2A1, GALNTL6, FUT1, WWOX, BCL9, AP3B1, GPR107, STX6, SCAMP1, NMNAT2, MDGA1, FUT10, CASC4, MECOM, CAPN2, GLCE, NOTCH3, PLEKHA8, TRAPPC9, NEDD4, ATP2C1, FNBP1L, EXT1, GBP3	290	1482	14527	1.14923	1	0.863784	98.942
Annotation Cluster 16	Enrichment Score: 1.0316210862087447
Category	Term	Count	%	PValue	Genes	List Total	Pop Hits	Pop Total	Fold Enrichment	Bonferroni	Benjamini	FDR
GOTERM_BP_FAT	GO:0006351~transcription, DNA-templated	89	19.8661	0.0154925	IL16, E2F6, YLPM1, ZNF827, NFKB1, PTEN, DDR2, PTMA, CITED1, GLI1, DPY30, SMARCD2, INTS4, WWP1, PLCB1, USP15, INSR, INO80C, WWOX, NR2F1, ATF7IP, ZNF33A, DAB2IP, ELP2, ZBTB20, SSBP2, ZNF280D, MINOS1-NBL1, LRRC1, TLE3, ARID1A, ZNF792, HNF4G, MECOM, RPTOR, ARHGEF11, TRAPPC9, ITGB1BP1, UBC, MNT, ZFPM2, CPSF3, KDM6B, CAMTA1, GCLC, USP3, UBE3A, FRYL, SOX5, CXXC5, PAXBP1, ZNF34, COMMD10, MYCBP2, ARX, TSC…	330	3605	16650	1.24562	1	0.689425	25.254
GOTERM_BP_FAT	GO:0032774~RNA biosynthetic process	95	21.2054	0.0173794	IL16, E2F6, YLPM1, ZNF827, NFKB1, PTEN, DDR2, PTMA, CITED1, GLI1, DPY30, SMARCD2, INTS4, WWP1, PDE8A, PLCB1, USP15, INSR, INO80C, WWOX, NR2F1, ATF7IP, ZNF33A, DAB2IP, ELP2, ZBTB20, SSBP2, ZNF280D, EMX1, MINOS1-NBL1, LRRC1, TLE3, ARID1A, ZNF792, HNF4G, MECOM, RPTOR, ARHGEF11, TRAPPC9, ITGB1BP1, UBC, MNT, ZFPM2, CPSF3, KDM6B, CAMTA1, GCLC, USP3, UBE3A, FRYL, SOX5, CXXC5, PAXBP1, ZNF34, COMMD10, MYC…	330	3905	16650	1.22745	1	0.705944	27.88
GOTERM_BP_FAT	GO:0006357~regulation of transcription from RNA polymerase II promoter	50	11.1607	0.0176344	E2F6, NFKB1, CITED1, GLI1, SMARCD2, USP15, WWOX, NR2F1, ATF7IP, ZBTB20, ELP2, DAB2IP, SSBP2, ZNF280D, MINOS1-NBL1, ARID1A, HNF4G, ITGB1BP1, MNT, UBC, ZFPM2, KDM6B, CAMTA1, USP3, UBE3A, PAXBP1, CXXC5, ARX, TSC22D3, NPAS3, ATN1, OTUD7B, NFAT5, NFATC4, MAML3, BCL9, TAF2, ERG, KLF12, ZMYM3, LMNA, FOXP2, NOTCH3, ZNF212, NEDD4, EBF2, KDM4C, ZNF462, NR5A2, RBPJ	330	1835	16650	1.37478	1	0.699222	28.2281
GOTERM_BP_FAT	GO:0097659~nucleic acid-templated transcription	92	20.5357	0.0183051	IL16, E2F6, YLPM1, ZNF827, NFKB1, PTEN, DDR2, PTMA, CITED1, GLI1, DPY30, SMARCD2, INTS4, WWP1, PDE8A, PLCB1, USP15, INSR, INO80C, WWOX, NR2F1, ATF7IP, ZNF33A, DAB2IP, ELP2, ZBTB20, SSBP2, ZNF280D, EMX1, MINOS1-NBL1, LRRC1, TLE3, ARID1A, ZNF792, HNF4G, MECOM, RPTOR, ARHGEF11, TRAPPC9, ITGB1BP1, UBC, MNT, ZFPM2, CPSF3, KDM6B, CAMTA1, GCLC, USP3, UBE3A, FRYL, SOX5, CXXC5, PAXBP1, ZNF34, COMMD10, MYC…	330	3771	16650	1.23093	1	0.701175	29.1362
GOTERM_BP_FAT	GO:0006355~regulation of transcription, DNA-templated	88	19.6429	0.0209927	IL16, E2F6, YLPM1, ZNF827, NFKB1, PTEN, DDR2, CITED1, GLI1, DPY30, SMARCD2, WWP1, PDE8A, PLCB1, USP15, INSR, INO80C, WWOX, NR2F1, ATF7IP, ZNF33A, DAB2IP, ELP2, ZBTB20, SSBP2, ZNF280D, EMX1, MINOS1-NBL1, LRRC1, TLE3, ARID1A, ZNF792, HNF4G, MECOM, RPTOR, ARHGEF11, TRAPPC9, ITGB1BP1, UBC, MNT, ZFPM2, KDM6B, CAMTA1, GCLC, USP3, UBE3A, FRYL, SOX5, CXXC5, PAXBP1, ZNF34, COMMD10, MYCBP2, ARX, TSC22D3, P…	330	3603	16650	1.23231	1	0.718188	32.6668
GOTERM_BP_FAT	GO:0006366~transcription from RNA polymerase II promoter	49	10.9375	0.0232154	E2F6, NFKB1, CITED1, GLI1, INTS4, USP15, WWOX, NR2F1, ATF7IP, ELP2, DAB2IP, ZBTB20, SSBP2, ZNF280D, MINOS1-NBL1, ARID1A, HNF4G, ITGB1BP1, MNT, UBC, ZFPM2, CPSF3, KDM6B, CAMTA1, USP3, UBE3A, SOX5, CXXC5, PAXBP1, ARX, TSC22D3, ATN1, NFAT5, OTUD7B, NFATC4, MAML3, BCL9, ZBTB7B, TAF2, KLF12, LMNA, INTS10, FOXP2, NOTCH3, NEDD4, EBF2, ZNF462, NR5A2, RBPJ	330	1820	16650	1.35839	1	0.734295	35.4603
GOTERM_BP_FAT	GO:1903506~regulation of nucleic acid-templated transcription	88	19.6429	0.024223	IL16, E2F6, YLPM1, ZNF827, NFKB1, PTEN, DDR2, CITED1, GLI1, DPY30, SMARCD2, WWP1, PDE8A, PLCB1, USP15, INSR, INO80C, WWOX, NR2F1, ATF7IP, ZNF33A, DAB2IP, ELP2, ZBTB20, SSBP2, ZNF280D, EMX1, MINOS1-NBL1, LRRC1, TLE3, ARID1A, ZNF792, HNF4G, MECOM, RPTOR, ARHGEF11, TRAPPC9, ITGB1BP1, UBC, MNT, ZFPM2, KDM6B, CAMTA1, GCLC, USP3, UBE3A, FRYL, SOX5, CXXC5, PAXBP1, ZNF34, COMMD10, MYCBP2, ARX, TSC22D3, P…	330	3625	16650	1.22483	1	0.744594	36.6901
GOTERM_BP_FAT	GO:2001141~regulation of RNA biosynthetic process	88	19.6429	0.0273301	IL16, E2F6, YLPM1, ZNF827, NFKB1, PTEN, DDR2, CITED1, GLI1, DPY30, SMARCD2, WWP1, PDE8A, PLCB1, USP15, INSR, INO80C, WWOX, NR2F1, ATF7IP, ZNF33A, DAB2IP, ELP2, ZBTB20, SSBP2, ZNF280D, EMX1, MINOS1-NBL1, LRRC1, TLE3, ARID1A, ZNF792, HNF4G, MECOM, RPTOR, ARHGEF11, TRAPPC9, ITGB1BP1, UBC, MNT, ZFPM2, KDM6B, CAMTA1, GCLC, USP3, UBE3A, FRYL, SOX5, CXXC5, PAXBP1, ZNF34, COMMD10, MYCBP2, ARX, TSC22D3, P…	330	3644	16650	1.21844	1	0.751409	40.3445
GOTERM_BP_FAT	GO:0034645~cellular macromolecule biosynthetic process	116	25.8929	0.0314666	RAD51B, IL16, ZNF827, IARS2, CITED1, SLC25A21, DPY30, SMARCD2, INTS4, WWP1, INSR, WWOX, DAB2IP, YARS, EMX1, FUT10, LRRC1, ARID1A, ZNF792, HNF4G, MECOM, GLCE, RPTOR, TRAPPC9, MNT, UGGT2, EXT1, CAMTA1, GCLC, SOX5, CXXC5, COMMD10, ARX, ATN1, RPL8, OTUD7B, CASZ1, RPL5, MAML3, TAF2, HIST1H3J, TRIP4, KLF12, ZMYM3, ZBTB41, INTS10, FOXP2, NOTCH3, POLD4, ZNF212, NEDD4, EBF2, RBPJ, E2F6, COA1, YLPM1, NFKB1…	330	5012	16650	1.16774	1	0.772295	44.9007
GOTERM_BP_FAT	GO:0051252~regulation of RNA metabolic process	89	19.8661	0.041737	IL16, E2F6, YLPM1, ZNF827, NFKB1, PTEN, DDR2, CITED1, GLI1, DPY30, SMARCD2, WWP1, PDE8A, PLCB1, USP15, INSR, INO80C, WWOX, NR2F1, ATF7IP, ZNF33A, DAB2IP, ELP2, ZBTB20, SSBP2, ZNF280D, EMX1, MINOS1-NBL1, LRRC1, TLE3, ARID1A, ZNF792, HNF4G, MECOM, RPTOR, ARHGEF11, TRAPPC9, ITGB1BP1, UBC, MNT, ZFPM2, KDM6B, CAMTA1, GCLC, USP3, UBE3A, FRYL, SOX5, CXXC5, PAXBP1, ZNF34, COMMD10, MYCBP2, ARX, TSC22D3, P…	330	3762	16650	1.19363	1	0.791519	54.8317
GOTERM_BP_FAT	GO:2000112~regulation of cellular macromolecule biosynthetic process	93	20.7589	0.0513793	IL16, E2F6, YLPM1, ZNF827, NFKB1, IARS2, PTEN, DDR2, CITED1, GLI1, DPY30, SMARCD2, WWP1, PDE8A, PLCB1, USP15, INSR, INO80C, WWOX, NR2F1, ATF7IP, ZNF33A, DAB2IP, ELP2, ZBTB20, SSBP2, ZNF280D, EMX1, MINOS1-NBL1, LRRC1, TLE3, ARID1A, ZNF792, HNF4G, MECOM, RPTOR, ARHGEF11, TRNAU1AP, TRAPPC9, ITGB1BP1, UBC, MNT, ZFPM2, KDM6B, CAMTA1, GCLC, USP3, UBE3A, FRYL, SOX5, CXXC5, PAXBP1, ZNF34, COMMD10, MYCBP2…	330	3991	16650	1.17571	1	0.819265	62.5927
GOTERM_BP_FAT	GO:0019219~regulation of nucleobase-containing compound metabolic process	95	21.2054	0.056146	IL16, E2F6, YLPM1, ZNF827, NFKB1, PTEN, DDR2, CITED1, GLI1, DPY30, SMARCD2, WWP1, PDE8A, PLCB1, RTEL1-TNFRSF6B, USP15, INSR, INO80C, WWOX, RTEL1, NR2F1, ATF7IP, ZNF33A, DAB2IP, ELP2, ZBTB20, SSBP2, ZNF280D, EMX1, MINOS1-NBL1, AIFM1, LRRC1, TLE3, PDE4D, ARID1A, ZNF792, HNF4G, MECOM, RPTOR, ARHGEF11, TRAPPC9, ITGB1BP1, UBC, MNT, ZFPM2, KDM6B, CAMTA1, GCLC, USP3, UBE3A, FRYL, SOX5, CXXC5, PAXBP1, ZN…	330	4104	16650	1.16793	1	0.83072	65.9458
GOTERM_BP_FAT	GO:0010556~regulation of macromolecule biosynthetic process	95	21.2054	0.0570327	IL16, E2F6, YLPM1, ZNF827, NFKB1, IARS2, PTEN, DDR2, CITED1, GLI1, DPY30, SMARCD2, WWP1, PDE8A, PLCB1, USP15, INSR, INO80C, WWOX, NR2F1, ATF7IP, ZNF33A, DAB2IP, ELP2, ZBTB20, SSBP2, ZNF280D, EMX1, MINOS1-NBL1, LRRC1, TLE3, ARID1A, ZNF792, FGF21, HNF4G, MECOM, RPTOR, ARHGEF11, TRNAU1AP, TRAPPC9, ITGB1BP1, UBC, MNT, PLA2G6, ZFPM2, KDM6B, CAMTA1, GCLC, USP3, UBE3A, FRYL, SOX5, CXXC5, PAXBP1, ZNF34, …	330	4107	16650	1.16708	1	0.826707	66.5373
GOTERM_BP_FAT	GO:0018130~heterocycle biosynthetic process	101	22.5446	0.0612046	RAD51B, IL16, E2F6, YLPM1, ZNF827, NFKB1, DDR2, PTEN, PTMA, CITED1, GLI1, DPY30, SMARCD2, INTS4, WWP1, PDE8A, PLCB1, USP15, INSR, WWOX, INO80C, NR2F1, ATF7IP, NMNAT2, DDC, DAB2IP, ZBTB20, ZNF33A, ELP2, SSBP2, ZNF280D, EMX1, MINOS1-NBL1, LRRC1, TLE3, ZNF792, ARID1A, HNF4G, MECOM, RPTOR, ARHGEF11, TRAPPC9, ITGB1BP1, MNT, UBC, ZFPM2, CPSF3, KDM6B, CAMTA1, GCLC, USP3, FRYL, UBE3A, SOX5, PAXBP1, CXXC5…	330	4411	16650	1.15527	1	0.837846	69.1921
GOTERM_BP_FAT	GO:0010468~regulation of gene expression	99	22.0982	0.0713294	IL16, ZNF827, IARS2, SGMS1, CITED1, DPY30, SMARCD2, WWP1, INSR, WWOX, DAB2IP, EMX1, LRRC1, ZNF792, ARID1A, HNF4G, MECOM, RPTOR, TRAPPC9, MNT, CAMTA1, GCLC, TDRD9, SOX5, CXXC5, COMMD10, ARX, ATN1, CASZ1, OTUD7B, MAML3, TAF2, HIST1H3J, TRIP4, KLF12, ZMYM3, ZBTB41, FOXP2, NOTCH3, ZNF212, NEDD4, EBF2, RBPJ, E2F6, YLPM1, NFKB1, DDR2, PTEN, GLI1, PSMD1, MKKS, PDE8A, PLCB1, USP15, INO80C, NR2F1, ATF7IP,…	330	4345	16650	1.1496	1	0.849416	74.8307
GOTERM_BP_FAT	GO:0034654~nucleobase-containing compound biosynthetic process	99	22.0982	0.0755789	RAD51B, IL16, ZNF827, CITED1, DPY30, SMARCD2, INTS4, WWP1, INSR, WWOX, NMNAT2, DAB2IP, EMX1, LRRC1, ZNF792, ARID1A, HNF4G, MECOM, RPTOR, TRAPPC9, MNT, CAMTA1, GCLC, SOX5, CXXC5, COMMD10, ARX, ATN1, RPL8, CASZ1, OTUD7B, RPL5, MAML3, TAF2, HIST1H3J, TRIP4, KLF12, ZMYM3, ZBTB41, AK5, INTS10, FOXP2, NOTCH3, POLD4, ZNF212, NEDD4, EBF2, RBPJ, E2F6, YLPM1, NFKB1, PTMA, DDR2, PTEN, GLI1, PDE8A, PLCB1, US…	330	4357	16650	1.14643	1	0.856057	76.8933
GOTERM_BP_FAT	GO:0019438~aromatic compound biosynthetic process	100	22.3214	0.0824252	RAD51B, IL16, E2F6, YLPM1, ZNF827, NFKB1, DDR2, PTEN, PTMA, CITED1, GLI1, DPY30, SMARCD2, INTS4, WWP1, PDE8A, PLCB1, USP15, INSR, WWOX, INO80C, NR2F1, ATF7IP, NMNAT2, DDC, DAB2IP, ZBTB20, ZNF33A, ELP2, SSBP2, ZNF280D, EMX1, MINOS1-NBL1, LRRC1, TLE3, ZNF792, ARID1A, HNF4G, MECOM, RPTOR, ARHGEF11, TRAPPC9, ITGB1BP1, MNT, UBC, ZFPM2, CPSF3, KDM6B, CAMTA1, GCLC, USP3, FRYL, UBE3A, SOX5, PAXBP1, CXXC5…	330	4424	16650	1.14047	1	0.861855	79.8834
GOTERM_BP_FAT	GO:0045893~positive regulation of transcription, DNA-templated	35	7.8125	0.0846098	CAMTA1, UBE3A, NFKB1, PAXBP1, CITED1, GLI1, NPAS3, NFAT5, NFATC4, MAML3, PLCB1, INSR, WWOX, BCL9, NR2F1, ATF7IP, TAF2, DAB2IP, SSBP2, TRIP4, KLF12, LMNA, ARID1A, MECOM, RPTOR, ARHGEF11, NOTCH3, EBF2, ITGB1BP1, UBC, ZFPM2, ZNF462, RBPJ, NR5A2, KDM6B	330	1349	16650	1.30905	1	0.860309	80.7577
GOTERM_BP_FAT	GO:1903508~positive regulation of nucleic acid-templated transcription	35	7.8125	0.0846098	CAMTA1, UBE3A, NFKB1, PAXBP1, CITED1, GLI1, NPAS3, NFAT5, NFATC4, MAML3, PLCB1, INSR, WWOX, BCL9, NR2F1, ATF7IP, TAF2, DAB2IP, SSBP2, TRIP4, KLF12, LMNA, ARID1A, MECOM, RPTOR, ARHGEF11, NOTCH3, EBF2, ITGB1BP1, UBC, ZFPM2, ZNF462, RBPJ, NR5A2, KDM6B	330	1349	16650	1.30905	1	0.860309	80.7577
GOTERM_BP_FAT	GO:0051171~regulation of nitrogen compound metabolic process	99	22.0982	0.0940326	IL16, ZNF827, IARS2, CITED1, DPY30, SMARCD2, WWP1, INSR, WWOX, DAB2IP, EMX1, LRRC1, ZNF792, ARID1A, PDE4D, HNF4G, MECOM, RPTOR, TRAPPC9, MNT, CAMTA1, GCLC, SOX5, CXXC5, COMMD10, ARX, ATN1, CASZ1, OTUD7B, MAML3, TAF2, HIST1H3J, TRIP4, KLF12, ZMYM3, ZBTB41, FOXP2, NOTCH3, ZNF212, NEDD4, EBF2, RBPJ, E2F6, YLPM1, NFKB1, DDR2, PTEN, GLI1, PSMD1, PDE8A, RTEL1-TNFRSF6B, PLCB1, USP15, RTEL1, INO80C, NR2F…	330	4404	16650	1.1342	1	0.873152	84.1334
GOTERM_BP_FAT	GO:1902680~positive regulation of RNA biosynthetic process	35	7.8125	0.0972111	CAMTA1, UBE3A, NFKB1, PAXBP1, CITED1, GLI1, NPAS3, NFAT5, NFATC4, MAML3, PLCB1, INSR, WWOX, BCL9, NR2F1, ATF7IP, TAF2, DAB2IP, SSBP2, TRIP4, KLF12, LMNA, ARID1A, MECOM, RPTOR, ARHGEF11, NOTCH3, EBF2, ITGB1BP1, UBC, ZFPM2, ZNF462, RBPJ, NR5A2, KDM6B	330	1369	16650	1.28993	1	0.873167	85.1396
GOTERM_BP_FAT	GO:0010628~positive regulation of gene expression	41	9.15179	0.131651	CAMTA1, UBE3A, NFKB1, PAXBP1, SGMS1, CITED1, GLI1, ARX, NPAS3, NFAT5, NFATC4, MAML3, PLCB1, INSR, WWOX, BCL9, GBA, NR2F1, ZBTB7B, ATF7IP, TAF2, HIST1H3J, DAB2IP, SSBP2, TRIP4, KLF12, LMNA, ARID1A, MECOM, RPTOR, ARHGEF11, NOTCH3, EBF2, ITGB1BP1, UBC, CNTN1, ZFPM2, ZNF462, RBPJ, NR5A2, KDM6B	330	1692	16650	1.2226	1	0.907724	92.8034
GOTERM_BP_FAT	GO:0051254~positive regulation of RNA metabolic process	35	7.8125	0.134094	CAMTA1, UBE3A, NFKB1, PAXBP1, CITED1, GLI1, NPAS3, NFAT5, NFATC4, MAML3, PLCB1, INSR, WWOX, BCL9, NR2F1, ATF7IP, TAF2, DAB2IP, SSBP2, TRIP4, KLF12, LMNA, ARID1A, MECOM, RPTOR, ARHGEF11, NOTCH3, EBF2, ITGB1BP1, UBC, ZFPM2, ZNF462, RBPJ, NR5A2, KDM6B	330	1415	16650	1.24799	1	0.908493	93.1717
GOTERM_BP_FAT	GO:0016070~RNA metabolic process	101	22.5446	0.170708	IL16, E2F6, YLPM1, ZNF827, NFKB1, IARS2, PTMA, DDR2, PTEN, CITED1, GLI1, DPY30, SMARCD2, INTS4, WWP1, PDE8A, PLCB1, USP15, INSR, ZCCHC6, WWOX, INO80C, NR2F1, ATF7IP, DAB2IP, ZBTB20, ZNF33A, ELP2, YARS, SSBP2, ZNF280D, EMX1, MINOS1-NBL1, LRRC1, TLE3, ZNF792, ARID1A, HNF4G, MECOM, RPTOR, ARHGEF11, TRAPPC9, ITGB1BP1, MNT, UBC, ZFPM2, CPSF3, KDM6B, CAMTA1, GCLC, USP3, FRYL, UBE3A, TDRD9, SOX5, PAXBP1…	330	4648	16650	1.09637	1	0.935045	96.9484
GOTERM_BP_FAT	GO:0010557~positive regulation of macromolecule biosynthetic process	38	8.48214	0.172707	CAMTA1, UBE3A, NFKB1, PAXBP1, CITED1, GLI1, IGF1R, NPAS3, NFAT5, NFATC4, MAML3, PLCB1, INSR, WWOX, BCL9, GBA, NR2F1, ATF7IP, TAF2, DAB2IP, SSBP2, TRIP4, KLF12, LMNA, ARID1A, FGF21, MECOM, RPTOR, ARHGEF11, NOTCH3, EBF2, ITGB1BP1, UBC, ZFPM2, ZNF462, RBPJ, NR5A2, KDM6B	330	1597	16650	1.20055	1	0.93606	97.0826
GOTERM_BP_FAT	GO:0045944~positive regulation of transcription from RNA polymerase II promoter	26	5.80357	0.176447	CAMTA1, UBE3A, NFKB1, PAXBP1, CITED1, GLI1, NFAT5, NFATC4, MAML3, WWOX, NR2F1, BCL9, TAF2, DAB2IP, SSBP2, KLF12, LMNA, NOTCH3, EBF2, ITGB1BP1, UBC, ZNF462, ZFPM2, NR5A2, RBPJ, KDM6B	330	1041	16650	1.26015	1	0.936535	97.3189
GOTERM_BP_FAT	GO:0010604~positive regulation of macromolecule metabolic process	64	14.2857	0.184244	SRCIN1, NFKB1, SGMS1, PTEN, DDR2, CITED1, GLI1, DAB1, PSMD1, PDE8A, PLCB1, INSR, WWOX, RTEL1, NR2F1, ATF7IP, RAP2B, RAP2A, DAB2IP, SSBP2, AIFM1, ANAPC4, ARID1A, FGF21, MECOM, RPTOR, ARHGEF11, INHBE, ITGB1BP1, UBC, PLA2G6, CNTN1, ZFPM2, KDM6B, CAMTA1, GCLC, UBE3A, PAXBP1, ARX, IGF1R, NPAS3, NFAT5, NFATC4, MAML3, BCL9, GBA, ZBTB7B, TAF2, HIST1H3J, TRIP4, KLF12, LMNA, ANXA2, NOTCH3, HSPBP1, EPS15, R…	330	2856	16650	1.13063	1	0.939513	97.7546
GOTERM_MF_FAT	GO:1901363~heterocyclic compound binding	130	29.0179	0.193809	RAD51B, ZNF827, IARS2, CITED1, KIFC3, HIST1H2BO, RTBDN, SMARCD2, PGRMC2, INSR, KIF13B, NMNAT2, YARS, KLLN, PDXK, CYP1A1, EMX1, FA2H, ARID1A, PDE4D, ZNF792, HNF4G, MECOM, RPTOR, ATP2C1, NAV2, MNT, GBP3, CAMTA1, RALYL, GCLC, DNAH14, DNAH17, TDRD9, SOX5, CXXC5, PRRC2C, ARX, RPL8, OTUD7B, CASZ1, RPL5, TAF2, HIST1H3J, KLF12, ZMYM3, ZBTB41, TRIO, AK5, FOXP2, HEATR6, ZNF212, EBF2, DDX59, CYP2R1, RBPJ, A…	315	5971	15478	1.0698	1	0.91093	96.3312
GOTERM_MF_FAT	GO:0003677~DNA binding	58	12.9464	0.241134	RAD51B, E2F6, ZNF827, NFKB1, CITED1, GLI1, HIST1H2BO, SMARCD2, RTEL1-TNFRSF6B, RTEL1, NR2F1, ZNF33A, ZBTB20, KLLN, SSBP2, ZNF280D, EMX1, AIFM1, ARID1A, ZNF792, HNF4G, MECOM, RPTOR, MNT, ZFPM2, MSANTD4, KDM6B, CAMTA1, USP3, SOX5, PAXBP1, CXXC5, ZNF34, ARX, PRDM15, NPAS3, OTUD7B, NFAT5, CASZ1, NFATC4, BAZ2B, ZBTB7B, TAF2, HIST1H3J, ERG, KLF12, ZNF568, ZMYM3, ZBTB41, FOXP2, TOX, ZNF212, EBF2, PSPC1,…	315	2562	15478	1.11238	1	0.915497	98.5498
GOTERM_MF_FAT	GO:0097159~organic cyclic compound binding	130	29.0179	0.251129	RAD51B, ZNF827, IARS2, CITED1, KIFC3, HIST1H2BO, RTBDN, SMARCD2, PGRMC2, INSR, KIF13B, NMNAT2, YARS, KLLN, PDXK, CYP1A1, EMX1, FA2H, ARID1A, PDE4D, ZNF792, HNF4G, MECOM, RPTOR, ATP2C1, NAV2, MNT, GBP3, CAMTA1, RALYL, GCLC, DNAH14, DNAH17, TDRD9, SOX5, CXXC5, PRRC2C, ARX, RPL8, OTUD7B, CASZ1, RPL5, TAF2, HIST1H3J, KLF12, ZMYM3, ZBTB41, TRIO, AK5, FOXP2, HEATR6, ZNF212, EBF2, DDX59, CYP2R1, RBPJ, A…	315	6052	15478	1.05548	1	0.913875	98.8167
GOTERM_BP_FAT	GO:0010467~gene expression	111	24.7768	0.287413	IL16, ZNF827, SGMS1, IARS2, CITED1, SLC25A21, DPY30, SMARCD2, INTS4, WWP1, INSR, WWOX, DAB2IP, YARS, EMX1, LRRC1, ARID1A, ZNF792, HNF4G, MECOM, RPTOR, TRAPPC9, MNT, ADAMTS3, CAMTA1, GCLC, TDRD9, SOX5, CXXC5, COMMD10, ARX, ATN1, RPL8, OTUD7B, CASZ1, RPL5, MAML3, TAF2, HIST1H3J, TRIP4, KLF12, ZMYM3, ZBTB41, INTS10, FOXP2, NOTCH3, ZNF212, NEDD4, EBF2, RBPJ, E2F6, COA1, YLPM1, NFKB1, PTMA, PTEN, DDR2…	330	5306	16650	1.05549	1	0.965936	99.8195
GOTERM_BP_FAT	GO:0045935~positive regulation of nucleobase-containing compound metabolic process	37	8.25893	0.303773	CAMTA1, UBE3A, NFKB1, PAXBP1, CITED1, GLI1, IGF1R, NPAS3, NFAT5, NFATC4, MAML3, PLCB1, INSR, RTEL1, WWOX, BCL9, NR2F1, ATF7IP, TAF2, DAB2IP, SSBP2, TRIP4, KLF12, LMNA, ARID1A, MECOM, RPTOR, ARHGEF11, NOTCH3, EBF2, ITGB1BP1, UBC, ZFPM2, ZNF462, RBPJ, NR5A2, KDM6B	330	1658	16650	1.12595	1	0.96782	99.8829
GOTERM_BP_FAT	GO:0009891~positive regulation of biosynthetic process	39	8.70536	0.311146	CAMTA1, UBE3A, NFKB1, PAXBP1, CITED1, GLI1, IGF1R, NPAS3, NFAT5, NFATC4, MAML3, PLCB1, INSR, WWOX, BCL9, GBA, NR2F1, ATF7IP, TAF2, DAB2IP, SSBP2, TRIP4, KLF12, LMNA, ARID1A, FGF21, MECOM, RPTOR, ARHGEF11, NOTCH3, EBF2, ITGB1BP1, UBC, PLA2G6, ZFPM2, ZNF462, RBPJ, NR5A2, KDM6B	330	1760	16650	1.11803	1	0.968501	99.904
GOTERM_BP_FAT	GO:0031328~positive regulation of cellular biosynthetic process	38	8.48214	0.323285	CAMTA1, UBE3A, NFKB1, PAXBP1, CITED1, GLI1, IGF1R, NPAS3, NFAT5, NFATC4, MAML3, PLCB1, INSR, WWOX, BCL9, GBA, NR2F1, ATF7IP, TAF2, DAB2IP, SSBP2, TRIP4, KLF12, LMNA, ARID1A, MECOM, RPTOR, ARHGEF11, NOTCH3, EBF2, ITGB1BP1, UBC, PLA2G6, ZFPM2, ZNF462, RBPJ, NR5A2, KDM6B	330	1729	16650	1.10889	1	0.970163	99.9311
GOTERM_BP_FAT	GO:0009893~positive regulation of metabolic process	64	14.2857	0.371193	SRCIN1, NFKB1, SGMS1, PTEN, DDR2, CITED1, GLI1, DAB1, PSMD1, PDE8A, PLCB1, INSR, WWOX, RTEL1, NR2F1, ATF7IP, RAP2B, RAP2A, DAB2IP, SSBP2, AIFM1, ANAPC4, ARID1A, FGF21, MECOM, RPTOR, ARHGEF11, INHBE, ITGB1BP1, UBC, PLA2G6, CNTN1, ZFPM2, KDM6B, CAMTA1, GCLC, UBE3A, PAXBP1, ARX, IGF1R, NPAS3, NFAT5, NFATC4, MAML3, BCL9, GBA, ZBTB7B, TAF2, HIST1H3J, TRIP4, KLF12, LMNA, ANXA2, NOTCH3, HSPBP1, EPS15, R…	330	3052	16650	1.05802	1	0.978777	99.9825
GOTERM_BP_FAT	GO:0051173~positive regulation of nitrogen compound metabolic process	38	8.48214	0.377536	CAMTA1, UBE3A, NFKB1, PAXBP1, CITED1, GLI1, IGF1R, NPAS3, NFAT5, NFATC4, MAML3, PLCB1, INSR, RTEL1, WWOX, BCL9, NR2F1, ATF7IP, TAF2, DAB2IP, SSBP2, TRIP4, KLF12, LMNA, ARID1A, MECOM, RPTOR, ARHGEF11, NOTCH3, EBF2, ITGB1BP1, UBC, PLA2G6, ZFPM2, ZNF462, RBPJ, NR5A2, KDM6B	330	1767	16650	1.08504	1	0.979867	99.9855
GOTERM_BP_FAT	GO:0031325~positive regulation of cellular metabolic process	59	13.1696	0.411969	SRCIN1, NFKB1, DDR2, PTEN, CITED1, GLI1, DAB1, PSMD1, PDE8A, PLCB1, INSR, WWOX, RTEL1, NR2F1, ATF7IP, RAP2B, RAP2A, DAB2IP, SSBP2, AIFM1, ANAPC4, ARID1A, FGF21, MECOM, RPTOR, ARHGEF11, INHBE, ITGB1BP1, UBC, PLA2G6, CNTN1, ZFPM2, KDM6B, CAMTA1, GCLC, UBE3A, PAXBP1, IGF1R, NPAS3, NFAT5, NFATC4, MAML3, BCL9, GBA, TAF2, TRIP4, KLF12, LMNA, ANXA2, NOTCH3, HSPBP1, EPS15, RNF114, EPGN, EBF2, ZNF462, RBP…	330	2839	16650	1.04854	1	0.982841	99.995
GOTERM_MF_FAT	GO:0003676~nucleic acid binding	83	18.5268	0.579008	RAD51B, E2F6, COA1, YLPM1, ZNF827, NFKB1, IARS2, CITED1, RPS19BP1, GLI1, HIST1H2BO, SMARCD2, RTEL1-TNFRSF6B, ZCCHC6, RTEL1, DLG2, NR2F1, ZNF33A, YARS, ZBTB20, KLLN, SSBP2, ZNF280D, EMX1, AIFM1, ARID1A, ZNF792, HNF4G, MECOM, RPTOR, ZCCHC14, TRNAU1AP, UBC, MNT, ZFPM2, MSANTD4, CPSF3, KDM6B, CAMTA1, RALYL, USP3, TDRD9, SOX5, CXXC5, PAXBP1, PRRC2C, ZNF34, NSUN7, ARX, PRDM15, NPAS3, RPL8, NFAT5, OTUD7…	315	4097	15478	0.995443	1	0.982682	99.9998
Annotation Cluster 17	Enrichment Score: 1.0177368030575542
Category	Term	Count	%	PValue	Genes	List Total	Pop Hits	Pop Total	Fold Enrichment	Bonferroni	Benjamini	FDR
GOTERM_BP_FAT	GO:0006357~regulation of transcription from RNA polymerase II promoter	50	11.1607	0.0176344	E2F6, NFKB1, CITED1, GLI1, SMARCD2, USP15, WWOX, NR2F1, ATF7IP, ZBTB20, ELP2, DAB2IP, SSBP2, ZNF280D, MINOS1-NBL1, ARID1A, HNF4G, ITGB1BP1, MNT, UBC, ZFPM2, KDM6B, CAMTA1, USP3, UBE3A, PAXBP1, CXXC5, ARX, TSC22D3, NPAS3, ATN1, OTUD7B, NFAT5, NFATC4, MAML3, BCL9, TAF2, ERG, KLF12, ZMYM3, LMNA, FOXP2, NOTCH3, ZNF212, NEDD4, EBF2, KDM4C, ZNF462, NR5A2, RBPJ	330	1835	16650	1.37478	1	0.699222	28.2281
GOTERM_BP_FAT	GO:0006366~transcription from RNA polymerase II promoter	49	10.9375	0.0232154	E2F6, NFKB1, CITED1, GLI1, INTS4, USP15, WWOX, NR2F1, ATF7IP, ELP2, DAB2IP, ZBTB20, SSBP2, ZNF280D, MINOS1-NBL1, ARID1A, HNF4G, ITGB1BP1, MNT, UBC, ZFPM2, CPSF3, KDM6B, CAMTA1, USP3, UBE3A, SOX5, CXXC5, PAXBP1, ARX, TSC22D3, ATN1, NFAT5, OTUD7B, NFATC4, MAML3, BCL9, ZBTB7B, TAF2, KLF12, LMNA, INTS10, FOXP2, NOTCH3, NEDD4, EBF2, ZNF462, NR5A2, RBPJ	330	1820	16650	1.35839	1	0.734295	35.4603
GOTERM_BP_FAT	GO:0000122~negative regulation of transcription from RNA polymerase II promoter	24	5.35714	0.0242669	ATF7IP, ZBTB20, DAB2IP, ELP2, KLF12, ZNF280D, USP3, E2F6, NFKB1, ARID1A, CXXC5, FOXP2, NOTCH3, ARX, TSC22D3, ATN1, NEDD4, MNT, UBC, OTUD7B, ZFPM2, NFATC4, RBPJ, NR2F1	330	748	16650	1.61886	1	0.740546	36.7432
GOTERM_BP_FAT	GO:0045892~negative regulation of transcription, DNA-templated	33	7.36607	0.0255286	GCLC, USP3, E2F6, NFKB1, CXXC5, CITED1, ARX, DPY30, TSC22D3, ATN1, WWP1, OTUD7B, NFATC4, PLCB1, NR2F1, ATF7IP, HIST1H3J, ZBTB20, ELP2, DAB2IP, KLF12, ZNF280D, ARID1A, MECOM, FOXP2, NOTCH3, NEDD4, PSPC1, MNT, UBC, ZFPM2, RBPJ, HIST1H2AM	330	1130	16650	1.47345	1	0.753784	38.2508
GOTERM_BP_FAT	GO:1903507~negative regulation of nucleic acid-templated transcription	33	7.36607	0.04145	GCLC, USP3, E2F6, NFKB1, CXXC5, CITED1, ARX, DPY30, TSC22D3, ATN1, WWP1, OTUD7B, NFATC4, PLCB1, NR2F1, ATF7IP, HIST1H3J, ZBTB20, ELP2, DAB2IP, KLF12, ZNF280D, ARID1A, MECOM, FOXP2, NOTCH3, NEDD4, PSPC1, MNT, UBC, ZFPM2, RBPJ, HIST1H2AM	330	1177	16650	1.41461	1	0.795093	54.5788
GOTERM_BP_FAT	GO:1902679~negative regulation of RNA biosynthetic process	33	7.36607	0.0486393	GCLC, USP3, E2F6, NFKB1, CXXC5, CITED1, ARX, DPY30, TSC22D3, ATN1, WWP1, OTUD7B, NFATC4, PLCB1, NR2F1, ATF7IP, HIST1H3J, ZBTB20, ELP2, DAB2IP, KLF12, ZNF280D, ARID1A, MECOM, FOXP2, NOTCH3, NEDD4, PSPC1, MNT, UBC, ZFPM2, RBPJ, HIST1H2AM	330	1194	16650	1.39447	1	0.806611	60.5264
GOTERM_BP_FAT	GO:0051253~negative regulation of RNA metabolic process	33	7.36607	0.0739466	GCLC, USP3, E2F6, NFKB1, CXXC5, CITED1, ARX, DPY30, TSC22D3, ATN1, WWP1, OTUD7B, NFATC4, PLCB1, NR2F1, ATF7IP, HIST1H3J, ZBTB20, ELP2, DAB2IP, KLF12, ZNF280D, ARID1A, MECOM, FOXP2, NOTCH3, NEDD4, PSPC1, MNT, UBC, ZFPM2, RBPJ, HIST1H2AM	330	1240	16650	1.34274	1	0.854777	76.1207
GOTERM_BP_FAT	GO:2000113~negative regulation of cellular macromolecule biosynthetic process	34	7.58929	0.0980755	GCLC, USP3, E2F6, NFKB1, CXXC5, CITED1, ARX, DPY30, TSC22D3, ATN1, WWP1, OTUD7B, NFATC4, PLCB1, NR2F1, ATF7IP, HIST1H3J, ZBTB20, ELP2, DAB2IP, KLF12, ZNF280D, ARID1A, MECOM, FOXP2, NOTCH3, NEDD4, PSPC1, MNT, UBC, ZFPM2, ZRANB3, RBPJ, HIST1H2AM	330	1324	16650	1.29566	1	0.874325	85.4027
GOTERM_BP_FAT	GO:0045934~negative regulation of nucleobase-containing compound metabolic process	35	7.8125	0.0992627	GCLC, USP3, E2F6, NFKB1, CXXC5, CITED1, ARX, DPY30, TSC22D3, ATN1, WWP1, OTUD7B, NFATC4, PLCB1, RTEL1, NR2F1, ATF7IP, HIST1H3J, ZBTB20, ELP2, DAB2IP, KLF12, ZNF280D, ARID1A, MECOM, FOXP2, NOTCH3, NEDD4, PSPC1, MNT, UBC, ZFPM2, ZRANB3, RBPJ, HIST1H2AM	330	1371	16650	1.28804	1	0.871331	85.7568
GOTERM_BP_FAT	GO:0010629~negative regulation of gene expression	36	8.03571	0.158004	GCLC, USP3, E2F6, TDRD9, NFKB1, CXXC5, CITED1, ARX, DPY30, TSC22D3, ATN1, WWP1, OTUD7B, MKKS, NFATC4, PLCB1, GBA, NR2F1, ATF7IP, HIST1H3J, ZBTB20, ELP2, DAB2IP, KLF12, ZNF280D, ARID1A, MECOM, FOXP2, NOTCH3, NEDD4, PSPC1, MNT, UBC, ZFPM2, RBPJ, HIST1H2AM	330	1485	16650	1.22314	1	0.928166	95.9485
GOTERM_BP_FAT	GO:0010558~negative regulation of macromolecule biosynthetic process	34	7.58929	0.18391	GCLC, USP3, E2F6, NFKB1, CXXC5, CITED1, ARX, DPY30, TSC22D3, ATN1, WWP1, OTUD7B, NFATC4, PLCB1, NR2F1, ATF7IP, HIST1H3J, ZBTB20, ELP2, DAB2IP, KLF12, ZNF280D, ARID1A, MECOM, FOXP2, NOTCH3, NEDD4, PSPC1, MNT, UBC, ZFPM2, ZRANB3, RBPJ, HIST1H2AM	330	1418	16650	1.20977	1	0.93974	97.7374
GOTERM_BP_FAT	GO:0010605~negative regulation of macromolecule metabolic process	52	11.6071	0.23033	SRCIN1, E2F6, NFKB1, PTEN, CITED1, SHB, DPY30, WWP1, PSMD1, SPRED2, MKKS, PLCB1, RTEL1, NR2F1, ATF7IP, ZBTB20, ELP2, DAB2IP, ZNF280D, ANAPC4, PTPRR, ARID1A, PDE4D, MECOM, PPM1E, ITGB1BP1, MNT, UBC, LRRC66, ZFPM2, GCLC, USP3, TDRD9, CXXC5, ARX, IGF1R, TSC22D3, ATN1, OTUD7B, NFATC4, GBA, HIST1H3J, KLF12, ANXA2, FOXP2, NOTCH3, NEDD4, RGS3, PSPC1, ZRANB3, RBPJ, HIST1H2AM	330	2326	16650	1.12796	1	0.952866	99.2406
GOTERM_BP_FAT	GO:0051172~negative regulation of nitrogen compound metabolic process	35	7.8125	0.231024	GCLC, USP3, E2F6, NFKB1, CXXC5, CITED1, ARX, DPY30, TSC22D3, ATN1, WWP1, OTUD7B, NFATC4, PLCB1, RTEL1, NR2F1, ATF7IP, HIST1H3J, ZBTB20, ELP2, DAB2IP, KLF12, ZNF280D, ARID1A, MECOM, FOXP2, NOTCH3, NEDD4, PSPC1, MNT, UBC, ZFPM2, ZRANB3, RBPJ, HIST1H2AM	330	1506	16650	1.17258	1	0.952547	99.2533
GOTERM_BP_FAT	GO:0031327~negative regulation of cellular biosynthetic process	34	7.58929	0.25807	GCLC, USP3, E2F6, NFKB1, CXXC5, CITED1, ARX, DPY30, TSC22D3, ATN1, WWP1, OTUD7B, NFATC4, PLCB1, NR2F1, ATF7IP, HIST1H3J, ZBTB20, ELP2, DAB2IP, KLF12, ZNF280D, ARID1A, MECOM, FOXP2, NOTCH3, NEDD4, PSPC1, MNT, UBC, ZFPM2, ZRANB3, RBPJ, HIST1H2AM	330	1480	16650	1.15909	1	0.960663	99.6169
GOTERM_BP_FAT	GO:0009890~negative regulation of biosynthetic process	34	7.58929	0.287857	GCLC, USP3, E2F6, NFKB1, CXXC5, CITED1, ARX, DPY30, TSC22D3, ATN1, WWP1, OTUD7B, NFATC4, PLCB1, NR2F1, ATF7IP, HIST1H3J, ZBTB20, ELP2, DAB2IP, KLF12, ZNF280D, ARID1A, MECOM, FOXP2, NOTCH3, NEDD4, PSPC1, MNT, UBC, ZFPM2, ZRANB3, RBPJ, HIST1H2AM	330	1504	16650	1.14059	1	0.965869	99.8215
GOTERM_BP_FAT	GO:0031324~negative regulation of cellular metabolic process	51	11.3839	0.301544	SRCIN1, E2F6, NFKB1, PTEN, CITED1, SHB, DPY30, WWP1, PSMD1, SPRED2, PLCB1, DLG2, RTEL1, NR2F1, ATF7IP, ZBTB20, ELP2, DAB2IP, ZNF280D, ANAPC4, PTPRR, ARID1A, PDE4D, MECOM, PPM1E, ITGB1BP1, MNT, UBC, LRRC66, ZFPM2, GCLC, USP3, CXXC5, ARX, IGF1R, TSC22D3, ATN1, OTUD7B, NFATC4, GBA, HIST1H3J, KLF12, ANXA2, FOXP2, NOTCH3, NEDD4, RGS3, PSPC1, ZRANB3, RBPJ, HIST1H2AM	330	2345	16650	1.09731	1	0.968376	99.8757
GOTERM_BP_FAT	GO:0009892~negative regulation of metabolic process	53	11.8304	0.391719	SRCIN1, E2F6, NFKB1, PTEN, CITED1, SHB, DPY30, WWP1, PSMD1, SPRED2, MKKS, PLCB1, DLG2, RTEL1, NR2F1, ATF7IP, ZBTB20, ELP2, DAB2IP, ZNF280D, ANAPC4, PTPRR, ARID1A, PDE4D, MECOM, PPM1E, ITGB1BP1, MNT, UBC, LRRC66, ZFPM2, GCLC, USP3, TDRD9, CXXC5, ARX, IGF1R, TSC22D3, ATN1, OTUD7B, NFATC4, GBA, HIST1H3J, KLF12, ANXA2, FOXP2, NOTCH3, NEDD4, RGS3, PSPC1, ZRANB3, RBPJ, HIST1H2AM	330	2522	16650	1.06031	1	0.980802	99.9906
Annotation Cluster 18	Enrichment Score: 0.9850510739317465
Category	Term	Count	%	PValue	Genes	List Total	Pop Hits	Pop Total	Fold Enrichment	Bonferroni	Benjamini	FDR
GOTERM_MF_FAT	GO:0016298~lipase activity	7	1.5625	0.0462737	PLCL1, FAAH, PLCH1, PLA2G6, MGLL, PLCB1, LIPC	315	128	15478	2.68715	1	0.792654	51.6597
GOTERM_MF_FAT	GO:0004620~phospholipase activity	6	1.33929	0.0585447	PLCL1, PLCH1, PLA2G6, MGLL, PLCB1, LIPC	315	103	15478	2.86232	1	0.842652	60.3701
GOTERM_MF_FAT	GO:0004435~phosphatidylinositol phospholipase C activity	3	0.669643	0.103387	PLCL1, PLCH1, PLCB1	315	27	15478	5.45961	1	0.933997	81.2569
GOTERM_MF_FAT	GO:0004629~phospholipase C activity	3	0.669643	0.123257	PLCL1, PLCH1, PLCB1	315	30	15478	4.91365	1	0.912673	86.7101
GOTERM_MF_FAT	GO:0052689~carboxylic ester hydrolase activity	5	1.11607	0.344068	FAAH, PLA2G6, MGLL, IARS2, LIPC	315	146	15478	1.68276	1	0.933492	99.8451
Annotation Cluster 19	Enrichment Score: 0.9816005036715492
Category	Term	Count	%	PValue	Genes	List Total	Pop Hits	Pop Total	Fold Enrichment	Bonferroni	Benjamini	FDR
GOTERM_CC_FAT	GO:0098590~plasma membrane region	26	5.80357	0.0810726	SHROOM3, SRCIN1, GRIK1, MYO7A, SYT7, NHS, DDR2, PTEN, GPHN, CRB1, SLC2A1, SLC39A6, INSR, MYOF, DLG2, LRRC7, CNTNAP4, FZD3, PDE4D, ANXA2, CTNNA2, EPS15, KCNJ4, SLC4A10, NEDD4, ADGRL1	290	936	14527	1.39148	1	0.726728	70.3118
GOTERM_CC_FAT	GO:0045177~apical part of cell	12	2.67857	0.106508	EPS15, NUMA1, SHROOM3, DAB1, CRB1, MYO7A, SLC2A1, FZD3, PDE4D, NHS, DDR2, PTEN	290	361	14527	1.66514	1	0.775631	80.1625
GOTERM_CC_FAT	GO:0016324~apical plasma membrane	10	2.23214	0.131505	EPS15, SHROOM3, CRB1, MYO7A, SLC2A1, FZD3, PDE4D, NHS, DDR2, PTEN	290	293	14527	1.70966	1	0.800103	86.803
Annotation Cluster 20	Enrichment Score: 0.9589379724854487
Category	Term	Count	%	PValue	Genes	List Total	Pop Hits	Pop Total	Fold Enrichment	Bonferroni	Benjamini	FDR
GOTERM_BP_FAT	GO:0000904~cell morphogenesis involved in differentiation	28	6.25	0.00212543	SRCIN1, MYO7A, PTEN, CITED1, ALCAM, ARX, SLC1A3, LAMB2, DAB1, UNC5D, NFATC4, SEMA3A, LRFN5, KIF13B, RAP2A, ERG, DAB2IP, ZNF280D, FZD3, CTNNA2, SEMA6A, SLITRK3, NEDD4, ITGB1BP1, RBPJ, APBB2, EXT1, PHLDB2	330	753	16650	1.87613	0.999844	0.490411	3.88885
GOTERM_BP_FAT	GO:0031175~neuron projection development	28	6.25	0.00628404	SRCIN1, FRYL, PTEN, ALCAM, ARX, LAMB2, DAB1, ATXN10, UNC5D, NFATC4, SEMA3A, LRFN5, GBA, KIF13B, NR2F1, RAP2A, DAB2IP, EMX1, ZNF280D, MINOS1-NBL1, FZD3, CTNNA2, SEMA6A, SLITRK3, NEDD4, CNTN1, APBB2, EXT1	330	817	16650	1.72916	1	0.617754	11.0875
GOTERM_BP_FAT	GO:0010771~negative regulation of cell morphogenesis involved in differentiation	8	1.78571	0.00939314	SEMA6A, DAB2IP, DAB1, ITGB1BP1, NFATC4, SEMA3A, PTEN, CITED1	330	119	16650	3.3919	1	0.66034	16.1329
GOTERM_BP_FAT	GO:0016358~dendrite development	9	2.00893	0.035385	RAP2A, DAB2IP, DAB1, SRCIN1, NEDD4, NFATC4, SEMA3A, PTEN, CTNNA2	330	190	16650	2.38995	1	0.776626	48.9113
GOTERM_BP_FAT	GO:0010769~regulation of cell morphogenesis involved in differentiation	13	2.90179	0.0376108	SEMA6A, RAP2A, DAB2IP, DAB1, SRCIN1, NEDD4, ITGB1BP1, NFATC4, SEMA3A, PTEN, PHLDB2, CITED1, KIF13B	330	339	16650	1.93484	1	0.784131	51.0648
GOTERM_BP_FAT	GO:0010721~negative regulation of cell development	12	2.67857	0.0419442	NOTCH3, SHB, SEMA6A, DIXDC1, DAB2IP, DAB1, ITGB1BP1, NFATC4, SEMA3A, PTEN, CITED1, NR2F1	330	306	16650	1.97861	1	0.790266	55.0134
GOTERM_BP_FAT	GO:0048814~regulation of dendrite morphogenesis	5	1.11607	0.0518672	RAP2A, SRCIN1, NEDD4, NFATC4, PTEN	330	71	16650	3.55314	1	0.815027	62.9498
GOTERM_BP_FAT	GO:0051960~regulation of nervous system development	23	5.13393	0.0534995	DIXDC1, RAP2A, DAB2IP, EMX1, SRCIN1, MINOS1-NBL1, FZD3, PTEN, GLI1, NOTCH3, SEMA6A, SLITRK3, DAB1, NEDD4, CASZ1, CNTN1, NFATC4, UNC5D, SEMA3A, ADGRL1, BRINP3, NR2F1, KIF13B	330	769	16650	1.50904	1	0.817835	64.121
GOTERM_BP_FAT	GO:0060284~regulation of cell development	24	5.35714	0.0800102	DIXDC1, RAP2A, DAB2IP, EMX1, SRCIN1, MINOS1-NBL1, FZD3, PTEN, CITED1, NOTCH3, SHB, SEMA6A, DAB1, NEDD4, ITGB1BP1, CASZ1, CNTN1, NFATC4, UNC5D, SEMA3A, BRINP3, PHLDB2, NR2F1, KIF13B	330	851	16650	1.42292	1	0.86269	78.8731
GOTERM_BP_FAT	GO:0050767~regulation of neurogenesis	20	4.46429	0.0839533	DIXDC1, RAP2A, DAB2IP, SRCIN1, EMX1, MINOS1-NBL1, FZD3, PTEN, NOTCH3, SEMA6A, DAB1, NEDD4, CASZ1, CNTN1, NFATC4, UNC5D, SEMA3A, BRINP3, KIF13B, NR2F1	330	682	16650	1.47961	1	0.859559	80.4988
GOTERM_BP_FAT	GO:0045665~negative regulation of neuron differentiation	8	1.78571	0.0889331	NOTCH3, SEMA6A, DIXDC1, DAB1, NFATC4, SEMA3A, PTEN, NR2F1	330	193	16650	2.09138	1	0.870054	82.3832
GOTERM_BP_FAT	GO:0045664~regulation of neuron differentiation	17	3.79464	0.0895475	DIXDC1, RAP2A, DAB2IP, SRCIN1, MINOS1-NBL1, PTEN, NOTCH3, SEMA6A, DAB1, NEDD4, CASZ1, CNTN1, NFATC4, SEMA3A, BRINP3, KIF13B, NR2F1	330	560	16650	1.53166	1	0.87056	82.6033
GOTERM_BP_FAT	GO:0022604~regulation of cell morphogenesis	17	3.79464	0.0987438	RAP2A, DAB2IP, SHROOM3, SRCIN1, ZMYM3, PTEN, CITED1, SEMA6A, DAB1, NEDD4, ITGB1BP1, NFATC4, SEMA3A, TBC1D1, PHLDB2, CDC42EP3, KIF13B	330	568	16650	1.51008	1	0.874921	85.603
GOTERM_BP_FAT	GO:0050773~regulation of dendrite development	6	1.33929	0.0995007	RAP2A, DAB2IP, SRCIN1, NEDD4, NFATC4, PTEN	330	124	16650	2.44135	1	0.870743	85.8267
GOTERM_BP_FAT	GO:0010977~negative regulation of neuron projection development	6	1.33929	0.115411	SEMA6A, DAB1, NFATC4, SEMA3A, PTEN, NR2F1	330	130	16650	2.32867	1	0.897237	89.8342
GOTERM_BP_FAT	GO:2000026~regulation of multicellular organismal development	42	9.375	0.119864	SRCIN1, SOX5, DDR2, PTEN, ZNRF3, CITED1, GLI1, GPC4, SHB, TSC22D3, DAB1, PSMD1, CASZ1, NFATC4, UNC5D, FBN2, SEMA3A, BRINP3, PLCB1, INSR, AP3B1, NR2F1, KIF13B, ZBTB7B, RAP2A, DIXDC1, DAB2IP, EMX1, MINOS1-NBL1, FZD3, FOXP2, NOTCH3, SEMA6A, SLITRK3, NEDD4, ITGB1BP1, UBC, CNTN1, ZFPM2, ADGRL1, RBPJ, PHLDB2	330	1721	16650	1.23131	1	0.897374	90.7469
GOTERM_BP_FAT	GO:0048813~dendrite morphogenesis	5	1.11607	0.12573	SRCIN1, NFATC4, SEMA3A, PTEN, CTNNA2	330	97	16650	2.60075	1	0.901303	91.8314
GOTERM_BP_FAT	GO:0050771~negative regulation of axonogenesis	4	0.892857	0.137329	SEMA6A, DAB1, SEMA3A, PTEN	330	65	16650	3.1049	1	0.910592	93.6318
GOTERM_BP_FAT	GO:0031344~regulation of cell projection organization	16	3.57143	0.163458	RAP2A, DAB2IP, SRCIN1, PTEN, SEMA6A, DAB1, FNBP1L, NEDD4, PLS1, CNTN1, NFATC4, SEMA3A, TBC1D1, CDC42EP3, KIF13B, NR2F1	330	572	16650	1.41132	1	0.931645	96.4108
GOTERM_BP_FAT	GO:0051129~negative regulation of cellular component organization	17	3.79464	0.175355	DAB2IP, LMNA, PTEN, CITED1, ANXA2, EML2, SEMA6A, DAB1, ITGB1BP1, TBCD, MKKS, NFATC4, SEMA3A, PHLDB2, RTEL1, NR2F1, GBA	330	624	16650	1.37456	1	0.936548	97.2519
GOTERM_BP_FAT	GO:0031345~negative regulation of cell projection organization	6	1.33929	0.186209	SEMA6A, DAB1, NFATC4, SEMA3A, PTEN, NR2F1	330	153	16650	1.97861	1	0.939816	97.8533
GOTERM_BP_FAT	GO:0022603~regulation of anatomical structure morphogenesis	26	5.80357	0.193866	RAP2A, DAB2IP, ERG, SHROOM3, SRCIN1, ZMYM3, FZD3, PTEN, ZNRF3, CITED1, GLI1, FOXP2, GPC4, SEMA6A, DAB1, NEDD4, ITGB1BP1, PSMD1, UBC, NFATC4, SEMA3A, RBPJ, TBC1D1, CDC42EP3, PHLDB2, KIF13B	330	1051	16650	1.24816	1	0.941339	98.2002
GOTERM_BP_FAT	GO:0010975~regulation of neuron projection development	12	2.67857	0.195969	RAP2A, SEMA6A, DAB2IP, DAB1, SRCIN1, NEDD4, CNTN1, NFATC4, SEMA3A, PTEN, KIF13B, NR2F1	330	413	16650	1.46599	1	0.941757	98.2858
GOTERM_BP_FAT	GO:0050768~negative regulation of neurogenesis	8	1.78571	0.212164	NOTCH3, SEMA6A, DIXDC1, DAB1, NFATC4, SEMA3A, PTEN, NR2F1	330	245	16650	1.6475	1	0.948106	98.8269
GOTERM_BP_FAT	GO:0051961~negative regulation of nervous system development	8	1.78571	0.268035	NOTCH3, SEMA6A, DIXDC1, DAB1, NFATC4, SEMA3A, PTEN, NR2F1	330	264	16650	1.52893	1	0.962004	99.7023
GOTERM_BP_FAT	GO:0045595~regulation of cell differentiation	35	7.8125	0.284379	SRCIN1, SOX5, NFKB1, PTEN, DDR2, CITED1, GLI1, SHB, DAB1, CASZ1, UNC5D, NFATC4, FBN2, SEMA3A, BRINP3, PLCB1, AP3B1, NR2F1, KIF13B, ZBTB7B, RAP2A, DIXDC1, DAB2IP, EMX1, MINOS1-NBL1, FZD3, CTNNA2, NOTCH3, SEMA6A, NEDD4, ITGB1BP1, CNTN1, ZFPM2, RBPJ, PHLDB2	330	1544	16650	1.14372	1	0.965034	99.8046
GOTERM_BP_FAT	GO:0050770~regulation of axonogenesis	5	1.11607	0.425035	SEMA6A, DAB1, SEMA3A, PTEN, KIF13B	330	168	16650	1.50162	1	0.983551	99.9967
GOTERM_BP_FAT	GO:0051093~negative regulation of developmental process	16	3.57143	0.497765	DIXDC1, DAB2IP, FZD3, PTEN, CITED1, NOTCH3, SHB, SEMA6A, TSC22D3, DAB1, ITGB1BP1, NFATC4, ZFPM2, SEMA3A, PHLDB2, NR2F1	330	739	16650	1.09239	1	0.988359	99.9997
GOTERM_BP_FAT	GO:0045596~negative regulation of cell differentiation	14	3.125	0.498123	DIXDC1, DAB2IP, PTEN, CITED1, NOTCH3, SHB, SEMA6A, DAB1, ITGB1BP1, NFATC4, ZFPM2, SEMA3A, RBPJ, NR2F1	330	640	16650	1.10369	1	0.988331	99.9997
GOTERM_BP_FAT	GO:0048640~negative regulation of developmental growth	3	0.669643	0.521567	SEMA6A, SEMA3A, PTEN	330	88	16650	1.72004	1	0.990029	99.9999
GOTERM_BP_FAT	GO:0008361~regulation of cell size	4	0.892857	0.667923	SEMA6A, SEMA3A, PTEN, RPTOR	330	173	16650	1.16658	1	0.996548	100
GOTERM_BP_FAT	GO:0045926~negative regulation of growth	5	1.11607	0.701576	SEMA6A, OSGIN1, SEMA3A, APBB2, PTEN	330	240	16650	1.05114	1	0.997488	100
Annotation Cluster 21	Enrichment Score: 0.9361383637865252
Category	Term	Count	%	PValue	Genes	List Total	Pop Hits	Pop Total	Fold Enrichment	Bonferroni	Benjamini	FDR
GOTERM_MF_FAT	GO:0003713~transcription coactivator activity	11	2.45536	0.0901516	TRIP4, SMARCD2, UBE3A, MNT, NFATC4, ARID1A, ZFPM2, MAML3, CITED1, WWOX, NR2F1	315	303	15478	1.78383	1	0.918727	76.5316
GOTERM_MF_FAT	GO:0000989~transcription factor activity, transcription factor binding	18	4.01786	0.11144	ATF7IP, TAF2, ELP2, TRIP4, KLF12, UBE3A, E2F6, ARID1A, CITED1, ZNF212, ATN1, SMARCD2, MNT, ZFPM2, NFATC4, MAML3, WWOX, NR2F1	315	606	15478	1.4595	1	0.937316	83.6797
GOTERM_MF_FAT	GO:0000988~transcription factor activity, protein binding	18	4.01786	0.116768	ATF7IP, TAF2, ELP2, TRIP4, KLF12, UBE3A, E2F6, ARID1A, CITED1, ZNF212, ATN1, SMARCD2, MNT, ZFPM2, NFATC4, MAML3, WWOX, NR2F1	315	612	15478	1.44519	1	0.931068	85.1182
GOTERM_MF_FAT	GO:0003712~transcription cofactor activity	16	3.57143	0.1535	ATF7IP, TRIP4, KLF12, UBE3A, E2F6, ARID1A, CITED1, ZNF212, ATN1, SMARCD2, MNT, NFATC4, ZFPM2, MAML3, WWOX, NR2F1	315	552	15478	1.42425	1	0.910618	92.2443
Annotation Cluster 22	Enrichment Score: 0.9295697211208936
Category	Term	Count	%	PValue	Genes	List Total	Pop Hits	Pop Total	Fold Enrichment	Bonferroni	Benjamini	FDR
GOTERM_BP_FAT	GO:0019751~polyol metabolic process	7	1.5625	0.0202738	PLCH1, CYP2R1, INPP4B, PLCB1, IPMK, PTEN, GBA	330	108	16650	3.2702	1	0.721482	31.7391
GOTERM_BP_FAT	GO:0043647~inositol phosphate metabolic process	5	1.11607	0.045478	PLCH1, INPP4B, PLCB1, IPMK, PTEN	330	68	16650	3.70989	1	0.794937	58.0081
GOTERM_BP_FAT	GO:1901615~organic hydroxy compound metabolic process	13	2.90179	0.114288	DDC, CYP1A1, CPQ, NFKB1, PTEN, CITED1, PLCH1, CYP2R1, INPP4B, LIPC, PLCB1, IPMK, GBA	330	410	16650	1.59978	1	0.895856	89.5909
GOTERM_BP_FAT	GO:0006066~alcohol metabolic process	9	2.00893	0.196207	PLCH1, CYP2R1, NFKB1, INPP4B, PLCB1, LIPC, IPMK, PTEN, GBA	330	282	16650	1.61025	1	0.941457	98.2952
GOTERM_BP_FAT	GO:0046173~polyol biosynthetic process	3	0.669643	0.201278	CYP2R1, IPMK, GBA	330	42	16650	3.6039	1	0.94408	98.4849
GOTERM_BP_FAT	GO:1901617~organic hydroxy compound biosynthetic process	6	1.33929	0.224577	DDC, CYP2R1, NFKB1, IPMK, CITED1, GBA	330	164	16650	1.8459	1	0.951158	99.1275
GOTERM_BP_FAT	GO:0046165~alcohol biosynthetic process	4	0.892857	0.332964	CYP2R1, NFKB1, IPMK, GBA	330	103	16650	1.9594	1	0.971667	99.9473
Annotation Cluster 23	Enrichment Score: 0.9282256927180935
Category	Term	Count	%	PValue	Genes	List Total	Pop Hits	Pop Total	Fold Enrichment	Bonferroni	Benjamini	FDR
GOTERM_BP_FAT	GO:0001738~morphogenesis of a polarized epithelium	7	1.5625	0.0516116	GPC4, RAP2A, PSMD1, UBC, FZD3, C5ORF42, ZNRF3	330	135	16650	2.61616	1	0.818271	62.7631
GOTERM_BP_FAT	GO:0007164~establishment of tissue polarity	6	1.33929	0.0944596	GPC4, PSMD1, UBC, FZD3, C5ORF42, ZNRF3	330	122	16650	2.48137	1	0.873073	84.2722
GOTERM_BP_FAT	GO:0001736~establishment of planar polarity	6	1.33929	0.0944596	GPC4, PSMD1, UBC, FZD3, C5ORF42, ZNRF3	330	122	16650	2.48137	1	0.873073	84.2722
GOTERM_BP_FAT	GO:2000027~regulation of organ morphogenesis	9	2.00893	0.127584	GPC4, PSMD1, UBC, FZD3, RBPJ, ZNRF3, CITED1, FOXP2, GLI1	330	252	16650	1.80195	1	0.903912	92.1484
GOTERM_BP_FAT	GO:0060071~Wnt signaling pathway, planar cell polarity pathway	5	1.11607	0.161813	GPC4, PSMD1, UBC, FZD3, ZNRF3	330	107	16650	2.35769	1	0.930278	96.2769
GOTERM_BP_FAT	GO:0090175~regulation of establishment of planar polarity	5	1.11607	0.173306	GPC4, PSMD1, UBC, FZD3, ZNRF3	330	110	16650	2.29339	1	0.936112	97.1218
GOTERM_BP_FAT	GO:0035567~non-canonical Wnt signaling pathway	6	1.33929	0.193	GPC4, PSMD1, UBC, FZD3, PLCB1, ZNRF3	330	155	16650	1.95308	1	0.942108	98.1638
Annotation Cluster 24	Enrichment Score: 0.8893889929726257
Category	Term	Count	%	PValue	Genes	List Total	Pop Hits	Pop Total	Fold Enrichment	Bonferroni	Benjamini	FDR
GOTERM_MF_FAT	GO:0042578~phosphoric ester hydrolase activity	17	3.79464	0.00436736	PTPRH, PTPN4, PTPRR, PDE4D, PTEN, PLCL1, PPM1E, PDE1C, PPP2CB, PDE1A, PLCH1, PPM1L, INPP4B, PDE8A, PLCB1, BPNT1, PLCXD2	315	376	15478	2.2216	0.96945	0.392464	6.49476
GOTERM_BP_FAT	GO:0006470~protein dephosphorylation	9	2.00893	0.135898	PPM1E, PTPRH, PPP2CB, PTPN4, PTPRR, PPP6R1, PPM1L, PTEN, GBA	330	256	16650	1.77379	1	0.909875	93.432
GOTERM_MF_FAT	GO:0004722~protein serine/threonine phosphatase activity	4	0.892857	0.15969	PPM1E, PPP2CB, PPM1L, PTEN	315	68	15478	2.89038	1	0.912203	93.0703
GOTERM_MF_FAT	GO:0004721~phosphoprotein phosphatase activity	7	1.5625	0.159955	PPM1E, PTPRH, PPP2CB, PTPN4, PTPRR, PPM1L, PTEN	315	180	15478	1.91086	1	0.908838	93.1037
GOTERM_MF_FAT	GO:0016791~phosphatase activity	9	2.00893	0.209933	PPM1E, PTPRH, PPP2CB, PTPN4, PTPRR, INPP4B, PPM1L, PTEN, BPNT1	315	280	15478	1.57939	1	0.90998	97.309
GOTERM_BP_FAT	GO:0016311~dephosphorylation	12	2.67857	0.21911	PPM1E, PTPRH, PPP2CB, PTPN4, PTPRR, PPP6R1, INPP4B, PPM1L, PTEN, BPNT1, DLG2, GBA	330	424	16650	1.42796	1	0.949141	99.0054
GOTERM_BP_FAT	GO:0035335~peptidyl-tyrosine dephosphorylation	4	0.892857	0.311294	PTPRH, PTPN4, PTPRR, PTEN	330	99	16650	2.03857	1	0.968318	99.9044
GOTERM_MF_FAT	GO:0004725~protein tyrosine phosphatase activity	4	0.892857	0.353401	PTPRH, PTPN4, PTPRR, PTEN	315	104	15478	1.88987	1	0.936585	99.8756
Annotation Cluster 25	Enrichment Score: 0.8879482071205915
Category	Term	Count	%	PValue	Genes	List Total	Pop Hits	Pop Total	Fold Enrichment	Bonferroni	Benjamini	FDR
GOTERM_BP_FAT	GO:0051017~actin filament bundle assembly	7	1.5625	0.0403563	PPM1E, BAIAP2L2, ITGB1BP1, PLS1, MKKS, SYNPO2, PHLDB2	330	127	16650	2.78096	1	0.792176	53.6028
GOTERM_BP_FAT	GO:0061572~actin filament bundle organization	7	1.5625	0.0457683	PPM1E, BAIAP2L2, ITGB1BP1, PLS1, MKKS, SYNPO2, PHLDB2	330	131	16650	2.69604	1	0.794379	58.2456
GOTERM_BP_FAT	GO:0032956~regulation of actin cytoskeleton organization	11	2.45536	0.0677182	ACTR3, DIXDC1, PPM1E, BAIAP2L2, ITGB1BP1, MKKS, IQGAP2, SYNPO2, ARPC5, CDC42EP3, PHLDB2	330	294	16650	1.88776	1	0.850456	72.9422
GOTERM_BP_FAT	GO:0007015~actin filament organization	12	2.67857	0.069656	ACTR3, PPM1E, BAIAP2L2, FRYL, ITGB1BP1, PLS1, MKKS, IQGAP2, SYNPO2, ARPC5, CDC42EP3, PHLDB2	330	335	16650	1.80733	1	0.849567	73.9716
GOTERM_BP_FAT	GO:0032970~regulation of actin filament-based process	12	2.67857	0.069656	ACTR3, DIXDC1, PPM1E, BAIAP2L2, ITGB1BP1, MKKS, IQGAP2, SYNPO2, PDE4D, ARPC5, CDC42EP3, PHLDB2	330	335	16650	1.80733	1	0.849567	73.9716
GOTERM_BP_FAT	GO:0032231~regulation of actin filament bundle assembly	5	1.11607	0.0737949	PPM1E, ITGB1BP1, MKKS, SYNPO2, PHLDB2	330	80	16650	3.15341	1	0.855891	76.0476
GOTERM_BP_FAT	GO:0051492~regulation of stress fiber assembly	4	0.892857	0.15588	PPM1E, ITGB1BP1, MKKS, PHLDB2	330	69	16650	2.9249	1	0.926779	95.7537
GOTERM_BP_FAT	GO:0032233~positive regulation of actin filament bundle assembly	3	0.669643	0.259748	PPM1E, ITGB1BP1, SYNPO2	330	50	16650	3.02727	1	0.960624	99.6328
GOTERM_BP_FAT	GO:0030038~contractile actin filament bundle assembly	3	0.669643	0.410853	PPM1E, ITGB1BP1, PHLDB2	330	71	16650	2.13188	1	0.982721	99.9948
GOTERM_BP_FAT	GO:0043149~stress fiber assembly	3	0.669643	0.410853	PPM1E, ITGB1BP1, PHLDB2	330	71	16650	2.13188	1	0.982721	99.9948
GOTERM_BP_FAT	GO:0031032~actomyosin structure organization	4	0.892857	0.558123	PPM1E, ITGB1BP1, KRT8, PHLDB2	330	147	16650	1.37291	1	0.992041	100
Annotation Cluster 26	Enrichment Score: 0.8832703886374318
Category	Term	Count	%	PValue	Genes	List Total	Pop Hits	Pop Total	Fold Enrichment	Bonferroni	Benjamini	FDR
GOTERM_MF_FAT	GO:0000981~RNA polymerase II transcription factor activity, sequence-specific DNA binding	24	5.35714	0.00856588	ZBTB7B, TAF2, CAMTA1, ZBTB20, ERG, SSBP2, KLF12, ZNF280D, ZMYM3, NFKB1, HNF4G, PAXBP1, FOXP2, GLI1, ARX, NPAS3, EBF2, MNT, NFAT5, ZFPM2, NFATC4, RBPJ, NR5A2, NR2F1	315	662	15478	1.78138	0.998947	0.496233	12.3648
GOTERM_MF_FAT	GO:0001227~transcriptional repressor activity, RNA polymerase II transcription regulatory region sequence-specific binding	10	2.23214	0.00985956	ARX, ZBTB20, KLF12, ZNF280D, MNT, NFKB1, NFATC4, ZFPM2, PAXBP1, FOXP2	315	176	15478	2.79185	0.999628	0.512232	14.1029
GOTERM_MF_FAT	GO:0003700~transcription factor activity, sequence-specific DNA binding	33	7.36607	0.0881092	CAMTA1, E2F6, SOX5, NFKB1, PAXBP1, CITED1, GLI1, ARX, TSC22D3, PRDM15, NPAS3, NFAT5, NFATC4, NR2F1, ZBTB7B, TAF2, ZNF33A, ERG, ZBTB20, SSBP2, KLF12, ZNF568, ZNF280D, ZMYM3, ZNF792, HNF4G, MECOM, FOXP2, EBF2, MNT, ZFPM2, RBPJ, NR5A2	315	1231	15478	1.31723	1	0.92759	75.7102
GOTERM_MF_FAT	GO:0001071~nucleic acid binding transcription factor activity	33	7.36607	0.0897537	CAMTA1, E2F6, SOX5, NFKB1, PAXBP1, CITED1, GLI1, ARX, TSC22D3, PRDM15, NPAS3, NFAT5, NFATC4, NR2F1, ZBTB7B, TAF2, ZNF33A, ERG, ZBTB20, SSBP2, KLF12, ZNF568, ZNF280D, ZMYM3, ZNF792, HNF4G, MECOM, FOXP2, EBF2, MNT, ZFPM2, RBPJ, NR5A2	315	1232	15478	1.31616	1	0.924565	76.3736
GOTERM_MF_FAT	GO:0000982~transcription factor activity, RNA polymerase II core promoter proximal region sequence-specific binding	12	2.67857	0.0929741	ZBTB7B, CAMTA1, ZBTB20, SSBP2, EBF2, NFAT5, NFATC4, ZFPM2, PAXBP1, RBPJ, NR5A2, FOXP2	315	343	15478	1.71906	1	0.918639	77.624
GOTERM_MF_FAT	GO:0044212~transcription regulatory region DNA binding	23	5.13393	0.146882	ZBTB7B, TAF2, SSBP2, KLF12, USP3, ZNF792, NFKB1, PAXBP1, RPTOR, CITED1, FOXP2, GLI1, ARX, PRDM15, SMARCD2, EBF2, PSPC1, MNT, NFAT5, NFATC4, RBPJ, NR5A2, NR2F1	315	853	15478	1.3249	1	0.928474	91.26
GOTERM_MF_FAT	GO:0003682~chromatin binding	15	3.34821	0.147161	TAF2, HIST1H3J, ERG, USP3, NFKB1, ARID1A, CITED1, GLI1, ARX, SMARCD2, EBF2, MNT, RBPJ, NR5A2, KDM6B	315	504	15478	1.4624	1	0.924919	91.3038
GOTERM_MF_FAT	GO:0000975~regulatory region DNA binding	23	5.13393	0.15041	ZBTB7B, TAF2, SSBP2, KLF12, USP3, ZNF792, NFKB1, PAXBP1, RPTOR, CITED1, FOXP2, GLI1, ARX, PRDM15, SMARCD2, EBF2, PSPC1, MNT, NFAT5, NFATC4, RBPJ, NR5A2, NR2F1	315	856	15478	1.32026	1	0.925596	91.7984
GOTERM_MF_FAT	GO:0043565~sequence-specific DNA binding	28	6.25	0.151623	CAMTA1, USP3, NFKB1, CXXC5, PAXBP1, GLI1, ARX, PRDM15, SMARCD2, NFAT5, NFATC4, NR2F1, ZBTB7B, TAF2, ERG, SSBP2, KLF12, EMX1, ZNF792, HNF4G, RPTOR, FOXP2, EBF2, PSPC1, MNT, RBPJ, NR5A2, KDM6B	315	1080	15478	1.27391	1	0.919557	91.9762
GOTERM_MF_FAT	GO:1990837~sequence-specific double-stranded DNA binding	20	4.46429	0.152975	ZBTB7B, SSBP2, USP3, KLF12, ZNF792, NFKB1, PAXBP1, RPTOR, FOXP2, GLI1, ARX, PRDM15, SMARCD2, EBF2, PSPC1, MNT, NFAT5, NFATC4, RBPJ, NR5A2	315	725	15478	1.35549	1	0.917639	92.1702
GOTERM_MF_FAT	GO:0001067~regulatory region nucleic acid binding	23	5.13393	0.153021	ZBTB7B, TAF2, SSBP2, KLF12, USP3, ZNF792, NFKB1, PAXBP1, RPTOR, CITED1, FOXP2, GLI1, ARX, PRDM15, SMARCD2, EBF2, PSPC1, MNT, NFAT5, NFATC4, RBPJ, NR5A2, NR2F1	315	857	15478	1.31872	1	0.91381	92.1767
GOTERM_MF_FAT	GO:0000977~RNA polymerase II regulatory region sequence-specific DNA binding	17	3.79464	0.163	ZBTB7B, SSBP2, KLF12, ZNF792, NFKB1, PAXBP1, FOXP2, GLI1, ARX, PRDM15, SMARCD2, EBF2, MNT, NFAT5, NFATC4, RBPJ, NR5A2	315	601	15478	1.38988	1	0.909606	93.4774
GOTERM_MF_FAT	GO:0001012~RNA polymerase II regulatory region DNA binding	17	3.79464	0.167757	ZBTB7B, SSBP2, KLF12, ZNF792, NFKB1, PAXBP1, FOXP2, GLI1, ARX, PRDM15, SMARCD2, EBF2, MNT, NFAT5, NFATC4, RBPJ, NR5A2	315	604	15478	1.38298	1	0.909214	94.0236
GOTERM_MF_FAT	GO:0000976~transcription regulatory region sequence-specific DNA binding	19	4.24107	0.168567	ZBTB7B, SSBP2, USP3, KLF12, ZNF792, NFKB1, PAXBP1, FOXP2, GLI1, ARX, PRDM15, SMARCD2, EBF2, PSPC1, MNT, NFAT5, NFATC4, RBPJ, NR5A2	315	692	15478	1.34912	1	0.906805	94.1122
GOTERM_MF_FAT	GO:0000978~RNA polymerase II core promoter proximal region sequence-specific DNA binding	11	2.45536	0.187685	ZBTB7B, SSBP2, SMARCD2, EBF2, NFAT5, NFATC4, PAXBP1, RBPJ, NR5A2, FOXP2, GLI1	315	356	15478	1.51826	1	0.912518	95.8795
GOTERM_MF_FAT	GO:0003690~double-stranded DNA binding	21	4.6875	0.202457	ZBTB7B, RAD51B, SSBP2, USP3, KLF12, ZNF792, NFKB1, PAXBP1, RPTOR, FOXP2, GLI1, ARX, PRDM15, SMARCD2, EBF2, PSPC1, MNT, NFAT5, NFATC4, RBPJ, NR5A2	315	805	15478	1.28182	1	0.918253	96.8907
GOTERM_MF_FAT	GO:0000987~core promoter proximal region sequence-specific DNA binding	11	2.45536	0.233168	ZBTB7B, SSBP2, SMARCD2, EBF2, NFAT5, NFATC4, PAXBP1, RBPJ, NR5A2, FOXP2, GLI1	315	376	15478	1.4375	1	0.919458	98.2978
GOTERM_MF_FAT	GO:0001159~core promoter proximal region DNA binding	11	2.45536	0.235009	ZBTB7B, SSBP2, SMARCD2, EBF2, NFAT5, NFATC4, PAXBP1, RBPJ, NR5A2, FOXP2, GLI1	315	378	15478	1.4299	1	0.918884	98.3594
GOTERM_MF_FAT	GO:0003677~DNA binding	58	12.9464	0.241134	RAD51B, E2F6, ZNF827, NFKB1, CITED1, GLI1, HIST1H2BO, SMARCD2, RTEL1-TNFRSF6B, RTEL1, NR2F1, ZNF33A, ZBTB20, KLLN, SSBP2, ZNF280D, EMX1, AIFM1, ARID1A, ZNF792, HNF4G, MECOM, RPTOR, MNT, ZFPM2, MSANTD4, KDM6B, CAMTA1, USP3, SOX5, PAXBP1, CXXC5, ZNF34, ARX, PRDM15, NPAS3, OTUD7B, NFAT5, CASZ1, NFATC4, BAZ2B, ZBTB7B, TAF2, HIST1H3J, ERG, KLF12, ZNF568, ZMYM3, ZBTB41, FOXP2, TOX, ZNF212, EBF2, PSPC1,…	315	2562	15478	1.11238	1	0.915497	98.5498
GOTERM_MF_FAT	GO:0001077~transcriptional activator activity, RNA polymerase II core promoter proximal region sequence-specific binding	7	1.5625	0.346198	ZBTB7B, CAMTA1, SSBP2, EBF2, NFAT5, RBPJ, NR5A2	315	236	15478	1.45744	1	0.933429	99.8526
GOTERM_MF_FAT	GO:0001228~transcriptional activator activity, RNA polymerase II transcription regulatory region sequence-specific binding	8	1.78571	0.492428	ZBTB7B, CAMTA1, SSBP2, EBF2, NFAT5, NFKB1, RBPJ, NR5A2	315	326	15478	1.2058	1	0.969402	99.997
Annotation Cluster 27	Enrichment Score: 0.8764735241230565
Category	Term	Count	%	PValue	Genes	List Total	Pop Hits	Pop Total	Fold Enrichment	Bonferroni	Benjamini	FDR
GOTERM_BP_FAT	GO:0006622~protein targeting to lysosome	3	0.669643	0.038919	NEDD4, SNX16, AP3B1	330	16	16650	9.46023	1	0.789283	52.2901
GOTERM_BP_FAT	GO:0061462~protein localization to lysosome	3	0.669643	0.0638758	NEDD4, SNX16, AP3B1	330	21	16650	7.20779	1	0.844672	70.7859
GOTERM_BP_FAT	GO:0006623~protein targeting to vacuole	3	0.669643	0.13127	NEDD4, SNX16, AP3B1	330	32	16650	4.73011	1	0.908844	92.7443
GOTERM_BP_FAT	GO:0072666~establishment of protein localization to vacuole	3	0.669643	0.138001	NEDD4, SNX16, AP3B1	330	33	16650	4.58678	1	0.910873	93.7237
GOTERM_BP_FAT	GO:0072665~protein localization to vacuole	3	0.669643	0.267101	NEDD4, SNX16, AP3B1	330	51	16650	2.96791	1	0.962446	99.6951
GOTERM_BP_FAT	GO:0007041~lysosomal transport	3	0.669643	0.458078	NEDD4, SNX16, AP3B1	330	78	16650	1.94056	1	0.986515	99.9989
Annotation Cluster 28	Enrichment Score: 0.8673557978980451
Category	Term	Count	%	PValue	Genes	List Total	Pop Hits	Pop Total	Fold Enrichment	Bonferroni	Benjamini	FDR
GOTERM_BP_FAT	GO:0007009~plasma membrane organization	13	2.90179	0.00926685	RAP2A, BAIAP2L2, KCNB2, FA2H, SYT7, PTEN, KCNIP4, ANXA2, CRB1, FNBP1L, SLMAP, PLS1, MYOF	330	277	16650	2.3679	1	0.665681	15.9333
GOTERM_BP_FAT	GO:0061024~membrane organization	28	6.25	0.0800713	SYT5, PPP6R1, SYT7, PTEN, KCNIP4, LNPEP, GPHN, STX12, CRB1, SLMAP, RPL8, PLS1, RPL5, TBC1D1, MYOF, DLG2, STX6, RAP2A, BAIAP2L2, KCNB2, FA2H, LMNA, RPL26, ANXA2, TRAPPC9, FNBP1L, ITGB1BP1, SYTL1	330	1027	16650	1.37559	1	0.861333	78.8993
GOTERM_BP_FAT	GO:0010256~endomembrane system organization	17	3.79464	0.0883363	STX6, RAP2A, BAIAP2L2, KCNB2, FA2H, LMNA, SYT7, PTEN, KCNIP4, ANXA2, KIFC3, TMEM127, CRB1, FNBP1L, SLMAP, PLS1, MYOF	330	559	16650	1.5344	1	0.869597	82.1668
GOTERM_BP_FAT	GO:0044802~single-organism membrane organization	24	5.35714	0.0927266	STX6, RAP2A, BAIAP2L2, SYT5, KCNB2, FA2H, RPL26, LMNA, SYT7, PTEN, KCNIP4, ANXA2, GPHN, STX12, CRB1, FNBP1L, ITGB1BP1, SLMAP, RPL8, PLS1, RPL5, MYOF, SYTL1, DLG2	330	866	16650	1.39828	1	0.87602	83.7016
GOTERM_BP_FAT	GO:0072659~protein localization to plasma membrane	6	1.33929	0.389206	RAP2A, KCNB2, SLMAP, PLS1, KCNIP4, ANXA2	330	207	16650	1.46245	1	0.98061	99.9898
GOTERM_BP_FAT	GO:1990778~protein localization to cell periphery	6	1.33929	0.463109	RAP2A, KCNB2, SLMAP, PLS1, KCNIP4, ANXA2	330	226	16650	1.3395	1	0.986605	99.9991
GOTERM_BP_FAT	GO:0090002~establishment of protein localization to plasma membrane	3	0.669643	0.774273	KCNB2, PLS1, ANXA2	330	142	16650	1.06594	1	0.998779	100
Annotation Cluster 29	Enrichment Score: 0.8630009502274628
Category	Term	Count	%	PValue	Genes	List Total	Pop Hits	Pop Total	Fold Enrichment	Bonferroni	Benjamini	FDR
GOTERM_BP_FAT	GO:0021549~cerebellum development	5	1.11607	0.112367	DAB1, CNTN1, C5ORF42, FOXP2, GLI1	330	93	16650	2.71261	1	0.893742	89.1618
GOTERM_BP_FAT	GO:0022037~metencephalon development	5	1.11607	0.143319	DAB1, CNTN1, C5ORF42, FOXP2, GLI1	330	102	16650	2.47326	1	0.916195	94.4076
GOTERM_BP_FAT	GO:0030902~hindbrain development	6	1.33929	0.159975	DAB1, CNTN1, C5ORF42, CTNNA2, FOXP2, GLI1	330	145	16650	2.08777	1	0.928628	96.1217
Annotation Cluster 30	Enrichment Score: 0.860022324111497
Category	Term	Count	%	PValue	Genes	List Total	Pop Hits	Pop Total	Fold Enrichment	Bonferroni	Benjamini	FDR
GOTERM_CC_FAT	GO:0045202~synapse	27	6.02679	0.00460862	GRIK1, SRCIN1, SYT5, MYO7A, SYT7, PTEN, GPHN, LAMB2, DAB1, SYN2, DLG2, LRRC7, STX6, SCAMP1, DDC, NMNAT2, TRIP4, CNTNAP4, FZD3, PCLO, CTNNA2, CADPS, GRM5, KCNJ4, ADGRL1, APBB2, SYTL1	290	755	14527	1.79141	0.896488	0.276756	6.41963
GOTERM_BP_FAT	GO:0051648~vesicle localization	13	2.90179	0.0047815	SYT5, MYO7A, PPP6R1, SYT7, PTEN, PCLO, CADPS, TRAPPC9, FNBP1L, MKKS, ADGRL1, SYTL1, AP3B1	330	254	16650	2.58232	1	0.592361	8.54759
GOTERM_BP_FAT	GO:0099504~synaptic vesicle cycle	8	1.78571	0.00784987	CADPS, DDC, SYT5, ADGRL1, SYT7, PTEN, PCLO, SYTL1	330	115	16650	3.50988	1	0.637384	13.6634
GOTERM_BP_FAT	GO:0051650~establishment of vesicle localization	12	2.67857	0.00886621	CADPS, TRAPPC9, FNBP1L, SYT5, MYO7A, PPP6R1, MKKS, ADGRL1, SYT7, PCLO, SYTL1, AP3B1	330	242	16650	2.50188	1	0.660033	15.2973
GOTERM_CC_FAT	GO:0044456~synapse part	22	4.91071	0.00993418	STX6, SCAMP1, DDC, CNTNAP4, GRIK1, SRCIN1, SYT5, FZD3, SYT7, PCLO, PTEN, CTNNA2, CADPS, GRM5, KCNJ4, GPHN, DAB1, SYN2, ADGRL1, SYTL1, LRRC7, DLG2	290	607	14527	1.81557	0.992569	0.387501	13.3596
GOTERM_BP_FAT	GO:0097479~synaptic vesicle localization	8	1.78571	0.017183	CADPS, SYT5, ADGRL1, SYT7, PTEN, PCLO, SYTL1, AP3B1	330	134	16650	3.01221	1	0.70797	27.6109
GOTERM_BP_FAT	GO:0051640~organelle localization	18	4.01786	0.0177707	SYT5, MYO7A, PPP6R1, SYT7, PCLO, PTEN, CCDC141, ACTR3, CADPS, SEMA6A, NUMA1, DAB1, TRAPPC9, FNBP1L, MKKS, ADGRL1, SYTL1, AP3B1	330	489	16650	1.85722	1	0.69615	28.4136
GOTERM_CC_FAT	GO:0098793~presynapse	12	2.67857	0.0258084	SCAMP1, STX6, CADPS, DDC, CNTNAP4, SYT5, SYN2, FZD3, ADGRL1, SYT7, PCLO, SYTL1	290	282	14527	2.13162	0.999997	0.491201	31.3103
GOTERM_BP_FAT	GO:0016079~synaptic vesicle exocytosis	6	1.33929	0.0277542	CADPS, SYT5, ADGRL1, SYT7, PCLO, SYTL1	330	86	16650	3.52008	1	0.752618	40.8276
GOTERM_MF_FAT	GO:0005544~calcium-dependent phospholipid binding	5	1.11607	0.0299377	SYT5, SYT7, PCLO, SYTL1, ANXA2	315	58	15478	4.23591	1	0.684489	37.2702
GOTERM_BP_FAT	GO:0097480~establishment of synaptic vesicle localization	7	1.5625	0.0403563	CADPS, SYT5, ADGRL1, SYT7, PCLO, SYTL1, AP3B1	330	127	16650	2.78096	1	0.792176	53.6028
GOTERM_BP_FAT	GO:0048489~synaptic vesicle transport	7	1.5625	0.0403563	CADPS, SYT5, ADGRL1, SYT7, PCLO, SYTL1, AP3B1	330	127	16650	2.78096	1	0.792176	53.6028
GOTERM_BP_FAT	GO:0006836~neurotransmitter transport	9	2.00893	0.0422102	CADPS, DDC, SLC1A3, SYT5, SYN2, ADGRL1, SYT7, PCLO, SYTL1	330	197	16650	2.30503	1	0.789495	55.2456
GOTERM_BP_FAT	GO:0099003~vesicle mediated transport in synapse	6	1.33929	0.0516943	CADPS, SYT5, ADGRL1, SYT7, PCLO, SYTL1	330	102	16650	2.96791	1	0.816365	62.8237
GOTERM_BP_FAT	GO:0007269~neurotransmitter secretion	7	1.5625	0.0578907	CADPS, SYT5, SYN2, ADGRL1, SYT7, PCLO, SYTL1	330	139	16650	2.54088	1	0.827009	67.1004
GOTERM_BP_FAT	GO:0099643~signal release from synapse	7	1.5625	0.0578907	CADPS, SYT5, SYN2, ADGRL1, SYT7, PCLO, SYTL1	330	139	16650	2.54088	1	0.827009	67.1004
GOTERM_BP_FAT	GO:0099531~presynaptic process involved in chemical synaptic transmission	7	1.5625	0.068132	CADPS, SYT5, SYN2, ADGRL1, SYT7, PCLO, SYTL1	330	145	16650	2.43574	1	0.848529	73.1652
GOTERM_BP_FAT	GO:0006906~vesicle fusion	6	1.33929	0.0691852	STX6, STX12, SYT5, SYT7, SYTL1, ANXA2	330	111	16650	2.72727	1	0.851212	73.725
GOTERM_BP_FAT	GO:0017156~calcium ion regulated exocytosis	6	1.33929	0.0713077	CADPS, SYT5, ADGRL1, SYT7, PCLO, SYTL1	330	112	16650	2.70292	1	0.851098	74.8198
GOTERM_BP_FAT	GO:0051656~establishment of organelle localization	14	3.125	0.0744206	SYT5, MYO7A, PPP6R1, SYT7, PCLO, ACTR3, CADPS, NUMA1, TRAPPC9, FNBP1L, MKKS, ADGRL1, SYTL1, AP3B1	330	420	16650	1.68182	1	0.854935	76.3475
GOTERM_BP_FAT	GO:0090174~organelle membrane fusion	6	1.33929	0.0801513	STX6, STX12, SYT5, SYT7, SYTL1, ANXA2	330	116	16650	2.60972	1	0.860045	78.9334
GOTERM_BP_FAT	GO:0001505~regulation of neurotransmitter levels	8	1.78571	0.096213	CADPS, SLC1A3, SYT5, SYN2, ADGRL1, SYT7, PCLO, SYTL1	330	197	16650	2.04892	1	0.872902	84.8304
GOTERM_CC_FAT	GO:0097060~synaptic membrane	10	2.23214	0.102737	KCNJ4, GPHN, CNTNAP4, SRCIN1, GRIK1, ADGRL1, SYT7, PTEN, DLG2, LRRC7	290	276	14527	1.81497	1	0.781459	78.9254
GOTERM_MF_FAT	GO:0005546~phosphatidylinositol-4,5-bisphosphate binding	4	0.892857	0.113329	SYT5, SYT7, PLCB1, ANXA2	315	58	15478	3.38872	1	0.935364	84.204
GOTERM_CC_FAT	GO:0030672~synaptic vesicle membrane	4	0.892857	0.125743	SCAMP1, SYT5, SYN2, SYT7	290	62	14527	3.23181	1	0.799972	85.4882
GOTERM_CC_FAT	GO:0099501~exocytic vesicle membrane	4	0.892857	0.125743	SCAMP1, SYT5, SYN2, SYT7	290	62	14527	3.23181	1	0.799972	85.4882
GOTERM_MF_FAT	GO:1902936~phosphatidylinositol bisphosphate binding	4	0.892857	0.126646	SYT5, SYT7, PLCB1, ANXA2	315	61	15478	3.22207	1	0.913952	87.4768
GOTERM_BP_FAT	GO:0007268~chemical synaptic transmission	17	3.79464	0.144207	CNTNAP4, GRIK1, SYT5, SYT7, PCLO, PTEN, GRM5, CADPS, PLCL1, SLC1A3, SYN2, PLA2G6, NFATC4, ADGRL1, LRFN5, SYTL1, DLG2	330	604	16650	1.42008	1	0.916774	94.5147
GOTERM_BP_FAT	GO:0099537~trans-synaptic signaling	17	3.79464	0.144207	CNTNAP4, GRIK1, SYT5, SYT7, PCLO, PTEN, GRM5, CADPS, PLCL1, SLC1A3, SYN2, PLA2G6, NFATC4, ADGRL1, LRFN5, SYTL1, DLG2	330	604	16650	1.42008	1	0.916774	94.5147
GOTERM_BP_FAT	GO:0099536~synaptic signaling	17	3.79464	0.144207	CNTNAP4, GRIK1, SYT5, SYT7, PCLO, PTEN, GRM5, CADPS, PLCL1, SLC1A3, SYN2, PLA2G6, NFATC4, ADGRL1, LRFN5, SYTL1, DLG2	330	604	16650	1.42008	1	0.916774	94.5147
GOTERM_BP_FAT	GO:0098916~anterograde trans-synaptic signaling	17	3.79464	0.144207	CNTNAP4, GRIK1, SYT5, SYT7, PCLO, PTEN, GRM5, CADPS, PLCL1, SLC1A3, SYN2, PLA2G6, NFATC4, ADGRL1, LRFN5, SYTL1, DLG2	330	604	16650	1.42008	1	0.916774	94.5147
GOTERM_CC_FAT	GO:0070382~exocytic vesicle	6	1.33929	0.150296	SCAMP1, DDC, SYT5, SYN2, SYT7, SYTL1	290	141	14527	2.13162	1	0.824204	90.3612
GOTERM_MF_FAT	GO:0030276~clathrin binding	4	0.892857	0.154817	SYT5, SYT7, SYTL1, GPR107	315	67	15478	2.93352	1	0.908724	92.4273
GOTERM_BP_FAT	GO:0048791~calcium ion-regulated exocytosis of neurotransmitter	3	0.669643	0.179751	SYT5, SYT7, SYTL1	330	39	16650	3.88112	1	0.939475	97.5125
GOTERM_BP_FAT	GO:0050804~modulation of synaptic transmission	9	2.00893	0.191107	GRM5, PLCL1, SLC1A3, CNTNAP4, GRIK1, PLA2G6, NFATC4, SYT7, PTEN	330	280	16650	1.62175	1	0.941899	98.0818
GOTERM_BP_FAT	GO:0044801~single-organism membrane fusion	6	1.33929	0.196429	STX6, STX12, SYT5, SYT7, SYTL1, ANXA2	330	156	16650	1.94056	1	0.941143	98.3039
GOTERM_CC_FAT	GO:0098794~postsynapse	11	2.45536	0.216649	GRM5, KCNJ4, GPHN, DAB1, SRCIN1, GRIK1, PTEN, PCLO, DLG2, LRRC7, CTNNA2	290	376	14527	1.46549	1	0.859901	97.002
GOTERM_BP_FAT	GO:0048284~organelle fusion	6	1.33929	0.220993	STX6, STX12, SYT5, SYT7, SYTL1, ANXA2	330	163	16650	1.85722	1	0.949727	99.0492
GOTERM_CC_FAT	GO:0008021~synaptic vesicle	5	1.11607	0.246604	SCAMP1, DDC, SYT5, SYN2, SYT7	290	127	14527	1.97217	1	0.866677	98.2876
GOTERM_CC_FAT	GO:0045211~postsynaptic membrane	7	1.5625	0.247558	KCNJ4, GPHN, SRCIN1, GRIK1, PTEN, DLG2, LRRC7	290	212	14527	1.65402	1	0.860121	98.3185
GOTERM_MF_FAT	GO:0000149~SNARE binding	5	1.11607	0.257524	STX6, STX12, SYT5, SYT7, SYTL1	315	127	15478	1.93451	1	0.917758	98.9626
GOTERM_MF_FAT	GO:0019905~syntaxin binding	4	0.892857	0.281177	STX6, SYT5, SYT7, SYTL1	315	91	15478	2.15985	1	0.931773	99.3687
GOTERM_BP_FAT	GO:0061025~membrane fusion	6	1.33929	0.326525	STX6, STX12, SYT5, SYT7, SYTL1, ANXA2	330	191	16650	1.58496	1	0.970079	99.937
GOTERM_CC_FAT	GO:0030658~transport vesicle membrane	5	1.11607	0.385293	SCAMP1, SYT5, SYN2, SPRED2, SYT7	290	158	14527	1.58522	1	0.910488	99.9078
GOTERM_BP_FAT	GO:0017158~regulation of calcium ion-dependent exocytosis	3	0.669643	0.438099	SYT5, SYT7, SYTL1	330	75	16650	2.01818	1	0.98515	99.9978
GOTERM_BP_FAT	GO:0017157~regulation of exocytosis	5	1.11607	0.460336	SYT5, PLA2G6, SYT7, PCLO, SYTL1	330	176	16650	1.43337	1	0.986515	99.999
GOTERM_CC_FAT	GO:0045335~phagocytic vesicle	3	0.669643	0.531385	STX6, STX12, SYT7	290	89	14527	1.68853	1	0.946626	99.9981
GOTERM_BP_FAT	GO:0006887~exocytosis	9	2.00893	0.547703	SCAMP1, CADPS, SRCIN1, SYT5, PLA2G6, ADGRL1, SYT7, PCLO, SYTL1	330	404	16650	1.12399	1	0.991409	100
GOTERM_BP_FAT	GO:0023061~signal release	9	2.00893	0.583772	CADPS, SYT5, SYN2, SLC2A1, PLA2G6, ADGRL1, SYT7, PCLO, SYTL1	330	417	16650	1.08895	1	0.993405	100
GOTERM_BP_FAT	GO:0007033~vacuole organization	5	1.11607	0.613572	STX6, TMEM127, STX12, MYO7A, SYT7	330	214	16650	1.17884	1	0.994715	100
GOTERM_BP_FAT	GO:0060627~regulation of vesicle-mediated transport	9	2.00893	0.666248	SYT5, PLA2G6, SYT7, TBC1D1, PTEN, PCLO, SYTL1, ANXA2, ADPRH	330	449	16650	1.01134	1	0.996532	100
GOTERM_BP_FAT	GO:0045055~regulated exocytosis	6	1.33929	0.676092	CADPS, SYT5, ADGRL1, SYT7, PCLO, SYTL1	330	288	16650	1.05114	1	0.996784	100
GOTERM_BP_FAT	GO:1903305~regulation of regulated secretory pathway	3	0.669643	0.689346	SYT5, SYT7, SYTL1	330	120	16650	1.26136	1	0.997164	100
GOTERM_CC_FAT	GO:0030133~transport vesicle	7	1.5625	0.68963	SCAMP1, DDC, SYT5, SYN2, SPRED2, SYT7, SYTL1	290	346	14527	1.01344	1	0.97543	100
GOTERM_CC_FAT	GO:0099503~secretory vesicle	7	1.5625	0.906783	SCAMP1, DDC, SYT5, SYN2, SYT7, GLIPR1L1, SYTL1	290	467	14527	0.75086	1	0.998455	100
GOTERM_BP_FAT	GO:0009306~protein secretion	6	1.33929	0.957032	SRCIN1, SLC2A1, PLA2G6, SYT7, RBPJ, PCLO	330	469	16650	0.645474	1	0.999993	100
GOTERM_BP_FAT	GO:0032940~secretion by cell	13	2.90179	0.971569	SCAMP1, SRCIN1, SYT5, SYT7, PCLO, CADPS, SLC1A3, SYN2, SLC2A1, PLA2G6, ADGRL1, RBPJ, SYTL1	330	966	16650	0.678995	1	0.999998	100
GOTERM_CC_FAT	GO:0030141~secretory granule	4	0.892857	0.975266	SCAMP1, SYT5, SYT7, GLIPR1L1	290	358	14527	0.559699	1	0.999901	100
GOTERM_BP_FAT	GO:0046903~secretion	14	3.125	0.98585	SCAMP1, SRCIN1, SYT5, SYT7, PCLO, ANXA2, CADPS, SLC1A3, SYN2, SLC2A1, PLA2G6, ADGRL1, RBPJ, SYTL1	330	1098	16650	0.643318	1	1	100
GOTERM_BP_FAT	GO:1903530~regulation of secretion by cell	7	1.5625	0.986708	SRCIN1, SYT5, SLC2A1, PLA2G6, SYT7, PCLO, SYTL1	330	630	16650	0.560606	1	1	100
GOTERM_BP_FAT	GO:0051046~regulation of secretion	7	1.5625	0.993514	SRCIN1, SYT5, SLC2A1, PLA2G6, SYT7, PCLO, SYTL1	330	683	16650	0.517104	1	1	100
Annotation Cluster 31	Enrichment Score: 0.8521234573602681
Category	Term	Count	%	PValue	Genes	List Total	Pop Hits	Pop Total	Fold Enrichment	Bonferroni	Benjamini	FDR
GOTERM_BP_FAT	GO:2001224~positive regulation of neuron migration	3	0.669643	0.0127848	SEMA6A, DAB2IP, SEMA3A	330	9	16650	16.8182	1	0.668514	21.3273
GOTERM_BP_FAT	GO:2001222~regulation of neuron migration	4	0.892857	0.0157432	SEMA6A, DAB2IP, UNC5D, SEMA3A	330	27	16650	7.47475	1	0.688756	25.608
GOTERM_BP_FAT	GO:0060485~mesenchyme development	7	1.5625	0.317321	SEMA6A, ERG, DAB2IP, NEDD4, ZFPM2, SEMA3A, RBPJ	330	234	16650	1.50932	1	0.969388	99.9188
GOTERM_BP_FAT	GO:0014031~mesenchymal cell development	5	1.11607	0.420607	SEMA6A, ERG, DAB2IP, SEMA3A, RBPJ	330	167	16650	1.51062	1	0.983216	99.9962
GOTERM_BP_FAT	GO:0048762~mesenchymal cell differentiation	5	1.11607	0.468946	SEMA6A, ERG, DAB2IP, SEMA3A, RBPJ	330	178	16650	1.41726	1	0.986742	99.9992
GOTERM_BP_FAT	GO:0001837~epithelial to mesenchymal transition	3	0.669643	0.612313	ERG, DAB2IP, RBPJ	330	104	16650	1.45542	1	0.994657	100
Annotation Cluster 32	Enrichment Score: 0.8505341759310097
Category	Term	Count	%	PValue	Genes	List Total	Pop Hits	Pop Total	Fold Enrichment	Bonferroni	Benjamini	FDR
GOTERM_MF_FAT	GO:0008081~phosphoric diester hydrolase activity	8	1.78571	0.00282622	PLCL1, PDE1C, PDE1A, PLCH1, PDE4D, PDE8A, PLCB1, PLCXD2	315	93	15478	4.2268	0.895198	0.431026	4.24933
GOTERM_MF_FAT	GO:0004114~3',5'-cyclic-nucleotide phosphodiesterase activity	4	0.892857	0.0168741	PDE1C, PDE1A, PDE4D, PDE8A	315	27	15478	7.27948	0.999999	0.549703	22.9796
GOTERM_MF_FAT	GO:0004112~cyclic-nucleotide phosphodiesterase activity	4	0.892857	0.0186211	PDE1C, PDE1A, PDE4D, PDE8A	315	28	15478	7.0195	1	0.564941	25.0528
GOTERM_MF_FAT	GO:0004115~3',5'-cyclic-AMP phosphodiesterase activity	3	0.669643	0.0361941	PDE1A, PDE4D, PDE8A	315	15	15478	9.8273	1	0.736982	43.1984
GOTERM_BP_FAT	GO:0006198~cAMP catabolic process	3	0.669643	0.0533617	PDE1A, PDE4D, PDE8A	330	19	16650	7.96651	1	0.819351	64.0235
GOTERM_BP_FAT	GO:0009214~cyclic nucleotide catabolic process	3	0.669643	0.0693723	PDE1A, PDE4D, PDE8A	330	22	16650	6.88017	1	0.850181	73.8233
GOTERM_BP_FAT	GO:0009154~purine ribonucleotide catabolic process	3	0.669643	0.151679	PDE1A, PDE4D, PDE8A	330	35	16650	4.32468	1	0.923198	95.342
GOTERM_BP_FAT	GO:0009261~ribonucleotide catabolic process	3	0.669643	0.158615	PDE1A, PDE4D, PDE8A	330	36	16650	4.20455	1	0.928262	96.003
GOTERM_BP_FAT	GO:0006195~purine nucleotide catabolic process	3	0.669643	0.252397	PDE1A, PDE4D, PDE8A	330	49	16650	3.08905	1	0.958336	99.5585
GOTERM_BP_FAT	GO:0072523~purine-containing compound catabolic process	3	0.669643	0.311109	PDE1A, PDE4D, PDE8A	330	57	16650	2.6555	1	0.96873	99.9039
GOTERM_BP_FAT	GO:0009166~nucleotide catabolic process	3	0.669643	0.382975	PDE1A, PDE4D, PDE8A	330	67	16650	2.25916	1	0.980366	99.9877
GOTERM_BP_FAT	GO:0046434~organophosphate catabolic process	4	0.892857	0.434527	PDE1A, PDE4D, PDE8A, PTEN	330	122	16650	1.65425	1	0.984561	99.9976
GOTERM_BP_FAT	GO:1901292~nucleoside phosphate catabolic process	3	0.669643	0.438099	PDE1A, PDE4D, PDE8A	330	75	16650	2.01818	1	0.98515	99.9978
GOTERM_BP_FAT	GO:1901136~carbohydrate derivative catabolic process	5	1.11607	0.486943	GPC4, PDE1A, PDE4D, PDE8A, GBA	330	182	16650	1.38611	1	0.987787	99.9996
GOTERM_BP_FAT	GO:0034655~nucleobase-containing compound catabolic process	8	1.78571	0.627463	AIFM1, PDE1A, RPL8, RPL26, RPL5, PDE4D, PDE8A, ZCCHC6	330	380	16650	1.0622	1	0.995293	100
GOTERM_BP_FAT	GO:0046058~cAMP metabolic process	3	0.669643	0.777605	PDE1A, PDE4D, PDE8A	330	143	16650	1.05849	1	0.998823	100
GOTERM_BP_FAT	GO:0009187~cyclic nucleotide metabolic process	3	0.669643	0.892444	PDE1A, PDE4D, PDE8A	330	190	16650	0.796651	1	0.999874	100
Annotation Cluster 33	Enrichment Score: 0.8364953790552522
Category	Term	Count	%	PValue	Genes	List Total	Pop Hits	Pop Total	Fold Enrichment	Bonferroni	Benjamini	FDR
GOTERM_BP_FAT	GO:0030029~actin filament-based process	22	4.91071	0.0264414	DIXDC1, RAP2A, BAIAP2L2, FRYL, MYO7A, IQGAP2, SYNPO2, PDE4D, ARPC5, ARHGEF11, ACTR3, PPM1E, FNBP1L, ATP2C1, XIRP2, ITGB1BP1, KRT8, PLS1, MKKS, PHLDB2, CDC42EP3, NPHP1	330	672	16650	1.65179	1	0.752709	39.3202
GOTERM_BP_FAT	GO:0051495~positive regulation of cytoskeleton organization	9	2.00893	0.0326472	ACTR3, PFDN2, PPM1E, BAIAP2L2, ITGB1BP1, IQGAP2, SYNPO2, ARPC5, CDC42EP3	330	187	16650	2.42829	1	0.773739	46.1395
GOTERM_BP_FAT	GO:0051493~regulation of cytoskeleton organization	15	3.34821	0.0415366	DIXDC1, BAIAP2L2, IQGAP2, SYNPO2, ARPC5, CAPN2, ACTR3, EML2, PFDN2, PPM1E, ITGB1BP1, TBCD, MKKS, PHLDB2, CDC42EP3	330	422	16650	1.79341	1	0.792841	54.6552
GOTERM_BP_FAT	GO:0030036~actin cytoskeleton organization	18	4.01786	0.0484876	RAP2A, BAIAP2L2, FRYL, IQGAP2, SYNPO2, ARPC5, ARHGEF11, ACTR3, PPM1E, XIRP2, ATP2C1, ITGB1BP1, KRT8, PLS1, MKKS, PHLDB2, CDC42EP3, NPHP1	330	553	16650	1.64228	1	0.808143	60.4088
GOTERM_BP_FAT	GO:0051128~regulation of cellular component organization	57	12.7232	0.0642779	SRCIN1, IQGAP2, OSGIN1, SYT7, PTEN, DDR2, CITED1, ACTR3, DAB1, PLS1, MKKS, SEMA3A, PLCB1, INSR, RTEL1, NR2F1, KIF13B, ATF7IP, RAP2A, DAB2IP, AIFM1, ANAPC4, RPTOR, CTNNA2, ARHGEF11, EML2, PFDN2, SLITRK3, PPM1E, FNBP1L, ITGB1BP1, TBCD, PLA2G6, CNTN1, SHROOM3, PAXBP1, ARPC5, NFATC4, TBC1D1, CDC42EP3, GBA, NPHP1, DIXDC1, BAIAP2L2, ZMYM3, LMNA, SYNPO2, CAPN2, ADPRH, ANXA2, SEMA6A, EPGN, NEDD4, PAPPA2,…	330	2323	16650	1.23802	1	0.844574	71.0189
GOTERM_BP_FAT	GO:0032956~regulation of actin cytoskeleton organization	11	2.45536	0.0677182	ACTR3, DIXDC1, PPM1E, BAIAP2L2, ITGB1BP1, MKKS, IQGAP2, SYNPO2, ARPC5, CDC42EP3, PHLDB2	330	294	16650	1.88776	1	0.850456	72.9422
GOTERM_BP_FAT	GO:0007015~actin filament organization	12	2.67857	0.069656	ACTR3, PPM1E, BAIAP2L2, FRYL, ITGB1BP1, PLS1, MKKS, IQGAP2, SYNPO2, ARPC5, CDC42EP3, PHLDB2	330	335	16650	1.80733	1	0.849567	73.9716
GOTERM_BP_FAT	GO:0032970~regulation of actin filament-based process	12	2.67857	0.069656	ACTR3, DIXDC1, PPM1E, BAIAP2L2, ITGB1BP1, MKKS, IQGAP2, SYNPO2, PDE4D, ARPC5, CDC42EP3, PHLDB2	330	335	16650	1.80733	1	0.849567	73.9716
GOTERM_BP_FAT	GO:0032271~regulation of protein polymerization	8	1.78571	0.0700039	ACTR3, EML2, BAIAP2L2, TBCD, MKKS, IQGAP2, ARPC5, CDC42EP3	330	182	16650	2.21778	1	0.847425	74.1525
GOTERM_BP_FAT	GO:0007010~cytoskeleton organization	30	6.69643	0.100246	FRYL, IQGAP2, ARPC5, ACTR3, NUMA1, KRT8, PLS1, MKKS, CDC42EP3, NPHP1, RAP2A, DIXDC1, BAIAP2L2, ZMYM3, LMNA, SYNPO2, PCLO, CTNNA2, ARHGEF11, EML2, PFDN2, SEMA6A, MAST1, PPM1E, XIRP2, ATP2C1, ITGB1BP1, TBCD, PHLDB2, ARHGAP10	330	1144	16650	1.32311	1	0.870328	86.0438
GOTERM_BP_FAT	GO:0044087~regulation of cellular component biogenesis	22	4.91071	0.121551	ATF7IP, DAB2IP, BAIAP2L2, IQGAP2, SYNPO2, ARPC5, PTEN, EML2, ACTR3, PPM1E, SLITRK3, FNBP1L, ITGB1BP1, TBCD, PLA2G6, MKKS, ADGRL1, TBC1D1, PHLDB2, CDC42EP3, GBA, NPHP1	330	807	16650	1.37546	1	0.895848	91.072
GOTERM_BP_FAT	GO:0030838~positive regulation of actin filament polymerization	5	1.11607	0.12573	ACTR3, BAIAP2L2, IQGAP2, ARPC5, CDC42EP3	330	97	16650	2.60075	1	0.901303	91.8314
GOTERM_BP_FAT	GO:0034314~Arp2/3 complex-mediated actin nucleation	3	0.669643	0.138001	ACTR3, IQGAP2, ARPC5	330	33	16650	4.58678	1	0.910873	93.7237
GOTERM_CC_FAT	GO:0015629~actin cytoskeleton	14	3.125	0.139883	BAIAP2L2, SRCIN1, MYO7A, IQGAP2, SYNPO2, ARPC5, DENND2A, CAPN2, CTNNA2, NOTCH3, ACTR3, SLC2A1, PLS1, CDC42EP3	290	467	14527	1.50172	1	0.813911	88.5183
GOTERM_BP_FAT	GO:0090066~regulation of anatomical structure size	14	3.125	0.163902	ACTR3, SEMA6A, GCLC, BAIAP2L2, ITGB1BP1, PLS1, MKKS, PLA2G6, IQGAP2, SEMA3A, ARPC5, CDC42EP3, PTEN, RPTOR	330	484	16650	1.45943	1	0.930854	96.4462
GOTERM_BP_FAT	GO:0044089~positive regulation of cellular component biogenesis	13	2.90179	0.165157	BAIAP2L2, IQGAP2, SYNPO2, ARPC5, ACTR3, PPM1E, SLITRK3, FNBP1L, ITGB1BP1, ADGRL1, PHLDB2, CDC42EP3, NPHP1	330	441	16650	1.48732	1	0.931725	96.5443
GOTERM_BP_FAT	GO:0032535~regulation of cellular component size	11	2.45536	0.165168	ACTR3, SEMA6A, BAIAP2L2, PLS1, MKKS, IQGAP2, SEMA3A, ARPC5, CDC42EP3, PTEN, RPTOR	330	354	16650	1.5678	1	0.931077	96.5451
GOTERM_BP_FAT	GO:0030833~regulation of actin filament polymerization	6	1.33929	0.182846	ACTR3, BAIAP2L2, MKKS, IQGAP2, ARPC5, CDC42EP3	330	152	16650	1.99163	1	0.939219	97.6818
GOTERM_BP_FAT	GO:0032273~positive regulation of protein polymerization	5	1.11607	0.189049	ACTR3, BAIAP2L2, IQGAP2, ARPC5, CDC42EP3	330	114	16650	2.21292	1	0.94153	97.9888
GOTERM_BP_FAT	GO:0030041~actin filament polymerization	6	1.33929	0.199878	ACTR3, BAIAP2L2, MKKS, IQGAP2, ARPC5, CDC42EP3	330	157	16650	1.9282	1	0.943827	98.4346
GOTERM_BP_FAT	GO:0010638~positive regulation of organelle organization	16	3.57143	0.214521	ACTR3, PFDN2, PPM1E, BAIAP2L2, EPGN, ITGB1BP1, IQGAP2, PLA2G6, SYNPO2, ARPC5, PAXBP1, PLCB1, CDC42EP3, INSR, RTEL1, ANXA2	330	600	16650	1.34545	1	0.949094	98.8906
GOTERM_BP_FAT	GO:0051258~protein polymerization	8	1.78571	0.215835	ACTR3, EML2, BAIAP2L2, TBCD, MKKS, IQGAP2, ARPC5, CDC42EP3	330	246	16650	1.6408	1	0.948786	98.9247
GOTERM_BP_FAT	GO:0043254~regulation of protein complex assembly	11	2.45536	0.223101	ACTR3, EML2, ATF7IP, DAB2IP, BAIAP2L2, TBCD, MKKS, IQGAP2, ARPC5, CDC42EP3, GBA	330	381	16650	1.45669	1	0.950475	99.096
GOTERM_BP_FAT	GO:0008064~regulation of actin polymerization or depolymerization	6	1.33929	0.246432	ACTR3, BAIAP2L2, MKKS, IQGAP2, ARPC5, CDC42EP3	330	170	16650	1.78075	1	0.956772	99.488
GOTERM_BP_FAT	GO:0030832~regulation of actin filament length	6	1.33929	0.250128	ACTR3, BAIAP2L2, MKKS, IQGAP2, ARPC5, CDC42EP3	330	171	16650	1.77033	1	0.95765	99.5328
GOTERM_BP_FAT	GO:0045010~actin nucleation	3	0.669643	0.274453	ACTR3, IQGAP2, ARPC5	330	52	16650	2.91084	1	0.963255	99.7474
GOTERM_BP_FAT	GO:0008154~actin polymerization or depolymerization	6	1.33929	0.318296	ACTR3, BAIAP2L2, MKKS, IQGAP2, ARPC5, CDC42EP3	330	189	16650	1.60173	1	0.96955	99.921
GOTERM_BP_FAT	GO:0033043~regulation of organelle organization	26	5.80357	0.338658	IQGAP2, ARPC5, PAXBP1, ACTR3, MKKS, PLCB1, TBC1D1, INSR, CDC42EP3, RTEL1, DIXDC1, BAIAP2L2, ANAPC4, LMNA, SYNPO2, CAPN2, ADPRH, ANXA2, EML2, PFDN2, PPM1E, EPGN, ITGB1BP1, TBCD, PLA2G6, PHLDB2	330	1152	16650	1.13873	1	0.972904	99.9551
GOTERM_BP_FAT	GO:0043623~cellular protein complex assembly	14	3.125	0.343398	BAIAP2L2, AIFM1, COA1, IQGAP2, ARPC5, NDUFA10, EPS15, ACTR3, CADPS, EML2, IMMP2L, TBCD, MKKS, CDC42EP3	330	575	16650	1.22846	1	0.97315	99.9607
GOTERM_BP_FAT	GO:0051130~positive regulation of cellular component organization	26	5.80357	0.393696	IQGAP2, ARPC5, PAXBP1, DDR2, ACTR3, PLS1, PLCB1, INSR, CDC42EP3, RTEL1, NPHP1, GBA, DAB2IP, BAIAP2L2, SYNPO2, ANXA2, PFDN2, PPM1E, SLITRK3, FNBP1L, EPGN, ITGB1BP1, CNTN1, PLA2G6, ADGRL1, PHLDB2	330	1183	16650	1.10889	1	0.981004	99.9911
GOTERM_BP_FAT	GO:1902589~single-organism organelle organization	34	7.58929	0.439579	SYT5, FRYL, IQGAP2, ARPC5, SYT7, C5ORF42, ACTR3, NUMA1, STX12, ATXN10, KRT8, PLS1, MKKS, CDC42EP3, RTEL1, NPHP1, STX6, RAP2A, BAIAP2L2, ANAPC4, LMNA, SYNPO2, ANXA2, ARHGEF11, EML2, PPM1E, XIRP2, ATP2C1, FNBP1L, ITGB1BP1, TBCD, CENPU, PHLDB2, SYTL1	330	1612	16650	1.06418	1	0.985324	99.998
GOTERM_BP_FAT	GO:0031334~positive regulation of protein complex assembly	5	1.11607	0.64922	ACTR3, BAIAP2L2, IQGAP2, ARPC5, CDC42EP3	330	224	16650	1.12622	1	0.995986	100
Annotation Cluster 34	Enrichment Score: 0.8143278670378871
Category	Term	Count	%	PValue	Genes	List Total	Pop Hits	Pop Total	Fold Enrichment	Bonferroni	Benjamini	FDR
GOTERM_BP_FAT	GO:0009790~embryo development	28	6.25	0.0387328	RAD51B, SHROOM3, FUT8, MYO7A, C5ORF42, CITED1, GLI1, KRT8, MKKS, SEMA3A, FBN2, PLCB1, IPMK, EMX1, CYP1A1, FUT10, PTPRR, ARID1A, FZD3, KIF16B, CAPN2, ZFPM2, CENPU, RBPJ, EXT1, NR5A2, PHLDB2, KDM6B	330	954	16650	1.48085	1	0.790816	52.1176
GOTERM_BP_FAT	GO:0009792~embryo development ending in birth or egg hatching	16	3.57143	0.17583	RAD51B, SHROOM3, CYP1A1, FUT8, EMX1, PTPRR, ARID1A, FZD3, CAPN2, CITED1, KRT8, ZFPM2, CENPU, RBPJ, EXT1, IPMK	330	583	16650	1.38469	1	0.936464	97.2813
GOTERM_BP_FAT	GO:0043009~chordate embryonic development	15	3.34821	0.250248	RAD51B, SHROOM3, FUT8, EMX1, PTPRR, ARID1A, FZD3, CAPN2, CITED1, KRT8, ZFPM2, CENPU, RBPJ, EXT1, IPMK	330	577	16650	1.31164	1	0.957367	99.5342
GOTERM_BP_FAT	GO:0001701~in utero embryonic development	9	2.00893	0.324448	RAD51B, FUT8, EMX1, KRT8, PTPRR, ZFPM2, CAPN2, RBPJ, CITED1	330	331	16650	1.37188	1	0.969709	99.9332
Annotation Cluster 35	Enrichment Score: 0.8128191442136266
Category	Term	Count	%	PValue	Genes	List Total	Pop Hits	Pop Total	Fold Enrichment	Bonferroni	Benjamini	FDR
GOTERM_BP_FAT	GO:0060285~cilium-dependent cell motility	3	0.669643	0.0693723	DNAH17, MKKS, DNAH2	330	22	16650	6.88017	1	0.850181	73.8233
GOTERM_BP_FAT	GO:0001539~cilium or flagellum-dependent cell motility	3	0.669643	0.0750172	DNAH17, MKKS, DNAH2	330	23	16650	6.58103	1	0.855567	76.6301
GOTERM_CC_FAT	GO:0044441~ciliary part	7	1.5625	0.700157	EPS15, DNAH17, MKKS, DNAH2, C5ORF42, GLIPR1L1, GLI1	290	350	14527	1.00186	1	0.976877	100
Annotation Cluster 36	Enrichment Score: 0.7952150358565334
Category	Term	Count	%	PValue	Genes	List Total	Pop Hits	Pop Total	Fold Enrichment	Bonferroni	Benjamini	FDR
GOTERM_BP_FAT	GO:0006928~movement of cell or subcellular component	51	11.3839	0.00780456	SRCIN1, IL16, MYO7A, DDR2, PTEN, KIFC3, GLI1, CCDC141, ACTR3, DAB1, MKKS, UNC5D, SEMA3A, PLCB1, INSR, AP3B1, KIF13B, RAP2B, RAP2A, DAB2IP, ZNF280D, MINOS1-NBL1, MDGA1, FUT10, PTPRR, PDE4D, KIF16B, CTNNA2, ARHGEF11, FNBP1L, ITGB1BP1, MCC, EXT1, FUT8, DNAH14, DNAH17, ASTN1, DNAH2, ARPC5, ARX, ALCAM, IGF1R, LAMB2, DIXDC1, ERG, LMNA, FZD3, MEMO1, SEMA6A, APBB2, PHLDB2	330	1795	16650	1.43353	1	0.658965	13.5898
GOTERM_BP_FAT	GO:0030336~negative regulation of cell migration	11	2.45536	0.0102195	RAP2B, RAP2A, DAB2IP, MINOS1-NBL1, ITGB1BP1, PTPRR, MCC, SEMA3A, PLCB1, PTEN, PHLDB2	330	214	16650	2.59346	1	0.662062	17.4276
GOTERM_BP_FAT	GO:0040011~locomotion	44	9.82143	0.0116258	FUT8, IL16, SRCIN1, DNAH17, ASTN1, DNAH2, ARPC5, DDR2, PTEN, GLI1, ARX, CCDC141, ALCAM, IGF1R, DAB1, LAMB2, MKKS, UNC5D, SEMA3A, PLCB1, INSR, RAP2B, RAP2A, DIXDC1, DAB2IP, ERG, ZNF280D, MINOS1-NBL1, MDGA1, FUT10, PTPRR, LMNA, PDE4D, FZD3, MEMO1, CTNNA2, SEMA6A, NEDD4, ITGB1BP1, PLA2G6, MCC, EXT1, APBB2, PHLDB2	330	1530	16650	1.45098	1	0.657123	19.5875
GOTERM_BP_FAT	GO:0040013~negative regulation of locomotion	12	2.67857	0.0139244	RAP2B, RAP2A, SEMA6A, DAB2IP, MINOS1-NBL1, ITGB1BP1, PTPRR, MCC, SEMA3A, PLCB1, PTEN, PHLDB2	330	258	16650	2.34672	1	0.69233	23.0032
GOTERM_BP_FAT	GO:0051271~negative regulation of cellular component movement	12	2.67857	0.0142429	RAP2B, RAP2A, SEMA6A, DAB2IP, MINOS1-NBL1, ITGB1BP1, PTPRR, MCC, SEMA3A, PLCB1, PTEN, PHLDB2	330	259	16650	2.33766	1	0.686074	23.4655
GOTERM_BP_FAT	GO:2000146~negative regulation of cell motility	11	2.45536	0.0150782	RAP2B, RAP2A, DAB2IP, MINOS1-NBL1, ITGB1BP1, PTPRR, MCC, SEMA3A, PLCB1, PTEN, PHLDB2	330	227	16650	2.44493	1	0.692953	24.6655
GOTERM_BP_FAT	GO:0010633~negative regulation of epithelial cell migration	5	1.11607	0.0218279	DAB2IP, ITGB1BP1, PTPRR, MCC, SEMA3A	330	54	16650	4.67172	1	0.727097	33.7296
GOTERM_BP_FAT	GO:0051674~localization of cell	37	8.25893	0.0334482	FUT8, IL16, SRCIN1, DNAH17, ASTN1, DNAH2, ARPC5, DDR2, PTEN, GLI1, ARX, CCDC141, IGF1R, DAB1, MKKS, UNC5D, SEMA3A, PLCB1, INSR, RAP2B, RAP2A, DIXDC1, DAB2IP, ERG, MINOS1-NBL1, MDGA1, FUT10, PTPRR, LMNA, PDE4D, FZD3, CTNNA2, SEMA6A, ITGB1BP1, MCC, APBB2, PHLDB2	330	1330	16650	1.40362	1	0.778376	46.9648
GOTERM_BP_FAT	GO:0048870~cell motility	37	8.25893	0.0334482	FUT8, IL16, SRCIN1, DNAH17, ASTN1, DNAH2, ARPC5, DDR2, PTEN, GLI1, ARX, CCDC141, IGF1R, DAB1, MKKS, UNC5D, SEMA3A, PLCB1, INSR, RAP2B, RAP2A, DIXDC1, DAB2IP, ERG, MINOS1-NBL1, MDGA1, FUT10, PTPRR, LMNA, PDE4D, FZD3, CTNNA2, SEMA6A, ITGB1BP1, MCC, APBB2, PHLDB2	330	1330	16650	1.40362	1	0.778376	46.9648
GOTERM_BP_FAT	GO:0016477~cell migration	32	7.14286	0.0671473	FUT8, IL16, ASTN1, ARPC5, DDR2, PTEN, GLI1, ARX, CCDC141, IGF1R, DAB1, UNC5D, SEMA3A, PLCB1, INSR, RAP2B, RAP2A, DIXDC1, ERG, DAB2IP, MINOS1-NBL1, MDGA1, FUT10, PTPRR, PDE4D, FZD3, CTNNA2, SEMA6A, ITGB1BP1, MCC, APBB2, PHLDB2	330	1184	16650	1.36364	1	0.849839	72.6316
GOTERM_BP_FAT	GO:0040012~regulation of locomotion	22	4.91071	0.0837558	RAP2B, RAP2A, DAB2IP, IL16, SRCIN1, MINOS1-NBL1, PTPRR, LMNA, PTEN, DDR2, MEMO1, GLI1, IGF1R, SEMA6A, ITGB1BP1, MKKS, MCC, UNC5D, SEMA3A, PLCB1, PHLDB2, INSR	330	768	16650	1.44531	1	0.863387	80.4203
GOTERM_BP_FAT	GO:2000145~regulation of cell motility	21	4.6875	0.0966406	RAP2B, RAP2A, DAB2IP, SRCIN1, MINOS1-NBL1, PTPRR, LMNA, PTEN, DDR2, MEMO1, GLI1, IGF1R, SEMA6A, ITGB1BP1, MKKS, MCC, UNC5D, SEMA3A, PLCB1, PHLDB2, INSR	330	736	16650	1.4396	1	0.872831	84.9636
GOTERM_BP_FAT	GO:0070373~negative regulation of ERK1 and ERK2 cascade	4	0.892857	0.106918	DAB2IP, ITGB1BP1, PTPRR, PTEN	330	58	16650	3.47962	1	0.883094	87.8521
GOTERM_BP_FAT	GO:0051270~regulation of cellular component movement	22	4.91071	0.115817	RAP2B, RAP2A, DAB2IP, SRCIN1, MINOS1-NBL1, PTPRR, LMNA, PDE4D, PTEN, DDR2, MEMO1, GLI1, IGF1R, SEMA6A, ITGB1BP1, MKKS, MCC, UNC5D, SEMA3A, PLCB1, PHLDB2, INSR	330	802	16650	1.38404	1	0.896008	89.9207
GOTERM_BP_FAT	GO:0030334~regulation of cell migration	19	4.24107	0.133842	RAP2B, RAP2A, DAB2IP, SRCIN1, MINOS1-NBL1, LMNA, PTPRR, PTEN, DDR2, GLI1, IGF1R, SEMA6A, ITGB1BP1, MCC, UNC5D, SEMA3A, PLCB1, PHLDB2, INSR	330	685	16650	1.39947	1	0.908933	93.1345
GOTERM_BP_FAT	GO:0050673~epithelial cell proliferation	9	2.00893	0.379916	DAB2IP, EPGN, ITGB1BP1, MCC, PTEN, LGR5, RPTOR, FOXP2, GLI1	330	347	16650	1.30862	1	0.980184	99.9865
GOTERM_BP_FAT	GO:0010632~regulation of epithelial cell migration	5	1.11607	0.429454	DAB2IP, ITGB1BP1, PTPRR, MCC, SEMA3A	330	169	16650	1.49274	1	0.984114	99.9971
GOTERM_BP_FAT	GO:0001667~ameboidal-type cell migration	8	1.78571	0.44744	SEMA6A, DAB2IP, ITGB1BP1, PTPRR, MCC, SEMA3A, DDR2, PTEN	330	320	16650	1.26136	1	0.98562	99.9984
GOTERM_BP_FAT	GO:0010631~epithelial cell migration	6	1.33929	0.471866	DAB2IP, ITGB1BP1, PTPRR, MCC, SEMA3A, PTEN	330	228	16650	1.32775	1	0.986766	99.9993
GOTERM_BP_FAT	GO:0090132~epithelium migration	6	1.33929	0.480517	DAB2IP, ITGB1BP1, PTPRR, MCC, SEMA3A, PTEN	330	231	16650	1.31051	1	0.987286	99.9995
GOTERM_MF_FAT	GO:0070851~growth factor receptor binding	4	0.892857	0.48289	DAB2IP, EPGN, FGF21, PTEN	315	128	15478	1.53552	1	0.969221	99.996
GOTERM_BP_FAT	GO:0090130~tissue migration	6	1.33929	0.504562	DAB2IP, ITGB1BP1, PTPRR, MCC, SEMA3A, PTEN	330	237	16650	1.27733	1	0.988879	99.9998
GOTERM_BP_FAT	GO:0070371~ERK1 and ERK2 cascade	6	1.33929	0.527605	DAB2IP, ITGB1BP1, PTPRR, PDE8A, FGF21, PTEN	330	243	16650	1.24579	1	0.990392	99.9999
GOTERM_BP_FAT	GO:0070372~regulation of ERK1 and ERK2 cascade	6	1.33929	0.546852	DAB2IP, ITGB1BP1, PTPRR, PDE8A, FGF21, PTEN	330	249	16650	1.21577	1	0.991431	100
GOTERM_BP_FAT	GO:0040017~positive regulation of locomotion	9	2.00893	0.597282	IGF1R, SEMA6A, DAB2IP, IL16, ITGB1BP1, SEMA3A, DDR2, INSR, GLI1	330	422	16650	1.07604	1	0.99397	100
GOTERM_BP_FAT	GO:0030335~positive regulation of cell migration	8	1.78571	0.667325	IGF1R, SEMA6A, DAB2IP, ITGB1BP1, SEMA3A, DDR2, INSR, GLI1	330	395	16650	1.02186	1	0.996541	100
GOTERM_BP_FAT	GO:0050680~negative regulation of epithelial cell proliferation	3	0.669643	0.680451	DAB2IP, MCC, PTEN	330	118	16650	1.28274	1	0.996911	100
GOTERM_BP_FAT	GO:2000147~positive regulation of cell motility	8	1.78571	0.702086	IGF1R, SEMA6A, DAB2IP, ITGB1BP1, SEMA3A, DDR2, INSR, GLI1	330	409	16650	0.986886	1	0.997491	100
GOTERM_BP_FAT	GO:0051272~positive regulation of cellular component movement	8	1.78571	0.727677	IGF1R, SEMA6A, DAB2IP, ITGB1BP1, SEMA3A, DDR2, INSR, GLI1	330	420	16650	0.961039	1	0.997958	100
GOTERM_BP_FAT	GO:0043542~endothelial cell migration	3	0.669643	0.811497	DAB2IP, ITGB1BP1, PTEN	330	154	16650	0.982881	1	0.999311	100
GOTERM_BP_FAT	GO:0043410~positive regulation of MAPK cascade	8	1.78571	0.847861	DAB2IP, EPGN, UBC, PDE8A, FGF21, PLCB1, PTEN, INSR	330	485	16650	0.83224	1	0.999646	100
GOTERM_BP_FAT	GO:0070374~positive regulation of ERK1 and ERK2 cascade	3	0.669643	0.867866	PDE8A, FGF21, PTEN	330	177	16650	0.855162	1	0.999762	100
GOTERM_BP_FAT	GO:0008285~negative regulation of cell proliferation	8	1.78571	0.975184	DAB2IP, TMEM127, ITGB1BP1, LMNA, MNT, MCC, RBPJ, PTEN	330	651	16650	0.620025	1	0.999999	100
Annotation Cluster 37	Enrichment Score: 0.7947884322586379
Category	Term	Count	%	PValue	Genes	List Total	Pop Hits	Pop Total	Fold Enrichment	Bonferroni	Benjamini	FDR
GOTERM_BP_FAT	GO:0042359~vitamin D metabolic process	3	0.669643	0.0585361	CYP1A1, CYP2R1, NFKB1	330	20	16650	7.56818	1	0.828315	67.518
GOTERM_BP_FAT	GO:0006766~vitamin metabolic process	6	1.33929	0.12097	GCLC, PDXK, CYP1A1, SLC2A1, CYP2R1, NFKB1	330	132	16650	2.29339	1	0.895644	90.9613
GOTERM_BP_FAT	GO:0006775~fat-soluble vitamin metabolic process	3	0.669643	0.201278	CYP1A1, CYP2R1, NFKB1	330	42	16650	3.6039	1	0.94408	98.4849
GOTERM_BP_FAT	GO:0008202~steroid metabolic process	7	1.5625	0.464462	ACOX2, CYP1A1, CYP2R1, NFKB1, NR5A2, LIPC, WWOX	330	276	16650	1.27964	1	0.986645	99.9991
Annotation Cluster 38	Enrichment Score: 0.7703848656895826
Category	Term	Count	%	PValue	Genes	List Total	Pop Hits	Pop Total	Fold Enrichment	Bonferroni	Benjamini	FDR
GOTERM_BP_FAT	GO:0048639~positive regulation of developmental growth	7	1.5625	0.100234	ARX, PLS1, MKKS, ZFPM2, RBPJ, PLCB1, INSR	330	161	16650	2.19368	1	0.871538	86.0403
GOTERM_BP_FAT	GO:0046622~positive regulation of organ growth	3	0.669643	0.215788	ARX, ZFPM2, RBPJ	330	44	16650	3.44008	1	0.9492	98.9235
GOTERM_BP_FAT	GO:0046620~regulation of organ growth	4	0.892857	0.225842	ARX, ZFPM2, RBPJ, PTEN	330	83	16650	2.43154	1	0.951676	99.1537
Annotation Cluster 39	Enrichment Score: 0.7692199648789437
Category	Term	Count	%	PValue	Genes	List Total	Pop Hits	Pop Total	Fold Enrichment	Bonferroni	Benjamini	FDR
GOTERM_BP_FAT	GO:0044344~cellular response to fibroblast growth factor stimulus	6	1.33929	0.115411	GCLC, ITGB1BP1, SPRED2, UBC, FGF21, KIF16B	330	130	16650	2.32867	1	0.897237	89.8342
GOTERM_BP_FAT	GO:0071774~response to fibroblast growth factor	6	1.33929	0.132453	GCLC, ITGB1BP1, SPRED2, UBC, FGF21, KIF16B	330	136	16650	2.22594	1	0.908259	92.9264
GOTERM_BP_FAT	GO:0008543~fibroblast growth factor receptor signaling pathway	4	0.892857	0.322128	SPRED2, UBC, FGF21, KIF16B	330	101	16650	1.9982	1	0.970162	99.9288
Annotation Cluster 40	Enrichment Score: 0.7661618907093898
Category	Term	Count	%	PValue	Genes	List Total	Pop Hits	Pop Total	Fold Enrichment	Bonferroni	Benjamini	FDR
GOTERM_BP_FAT	GO:0030148~sphingolipid biosynthetic process	6	1.33929	0.0448564	FA2H, PLA2G6, KDSR, PPM1L, SGMS1, GBA	330	98	16650	3.08905	1	0.793054	57.4954
GOTERM_BP_FAT	GO:0046467~membrane lipid biosynthetic process	7	1.5625	0.0562799	PIGM, FA2H, PLA2G6, KDSR, PPM1L, SGMS1, GBA	330	138	16650	2.55929	1	0.82922	66.0358
GOTERM_BP_FAT	GO:0006665~sphingolipid metabolic process	6	1.33929	0.193	FA2H, PLA2G6, KDSR, PPM1L, SGMS1, GBA	330	155	16650	1.95308	1	0.942108	98.1638
GOTERM_BP_FAT	GO:0006643~membrane lipid metabolic process	7	1.5625	0.217332	PIGM, FA2H, PLA2G6, KDSR, PPM1L, SGMS1, GBA	330	204	16650	1.73128	1	0.949076	98.9623
GOTERM_BP_FAT	GO:0008610~lipid biosynthetic process	16	3.57143	0.25552	ACOX2, CYP1A1, FA2H, FADS2, NFKB1, SGMS1, PTEN, PIGM, PLA2G6, MGLL, INPP4B, CYP2R1, KDSR, PPM1L, LIPC, GBA	330	624	16650	1.29371	1	0.959858	99.5916
GOTERM_BP_FAT	GO:0046513~ceramide biosynthetic process	3	0.669643	0.318402	PLA2G6, SGMS1, GBA	330	58	16650	2.60972	1	0.969358	99.9212
GOTERM_BP_FAT	GO:0006672~ceramide metabolic process	3	0.669643	0.503045	PLA2G6, SGMS1, GBA	330	85	16650	1.78075	1	0.988817	99.9998
Annotation Cluster 41	Enrichment Score: 0.7634479944102964
Category	Term	Count	%	PValue	Genes	List Total	Pop Hits	Pop Total	Fold Enrichment	Bonferroni	Benjamini	FDR
GOTERM_BP_FAT	GO:0090287~regulation of cellular response to growth factor stimulus	10	2.23214	0.0442481	DAB2IP, MINOS1-NBL1, NEDD4, UBC, FBN2, ADAMTS3, RBPJ, MYOF, CITED1, BCL9	330	235	16650	2.147	1	0.796741	56.9879
GOTERM_BP_FAT	GO:0007178~transmembrane receptor protein serine/threonine kinase signaling pathway	11	2.45536	0.106843	LNPEP, FUT8, MINOS1-NBL1, INHBE, UBC, PPM1L, FBN2, RBPJ, USP15, CITED1, BCL9	330	322	16650	1.7236	1	0.884064	87.833
GOTERM_BP_FAT	GO:0071560~cellular response to transforming growth factor beta stimulus	8	1.78571	0.130205	FUT8, UBC, SOX5, FBN2, USP15, CITED1, WWOX, BCL9	330	213	16650	1.89501	1	0.907836	92.5766
GOTERM_BP_FAT	GO:0071559~response to transforming growth factor beta	8	1.78571	0.135043	FUT8, UBC, SOX5, FBN2, USP15, CITED1, WWOX, BCL9	330	215	16650	1.87738	1	0.909269	93.3098
GOTERM_BP_FAT	GO:0090092~regulation of transmembrane receptor protein serine/threonine kinase signaling pathway	7	1.5625	0.243195	MINOS1-NBL1, INHBE, UBC, FBN2, RBPJ, CITED1, BCL9	330	212	16650	1.66595	1	0.955794	99.4454
GOTERM_BP_FAT	GO:1903844~regulation of cellular response to transforming growth factor beta stimulus	4	0.892857	0.31671	UBC, FBN2, CITED1, BCL9	330	100	16650	2.01818	1	0.969374	99.9175
GOTERM_BP_FAT	GO:0017015~regulation of transforming growth factor beta receptor signaling pathway	4	0.892857	0.31671	UBC, FBN2, CITED1, BCL9	330	100	16650	2.01818	1	0.969374	99.9175
GOTERM_BP_FAT	GO:0007179~transforming growth factor beta receptor signaling pathway	5	1.11607	0.384944	FUT8, UBC, FBN2, USP15, CITED1	330	159	16650	1.58662	1	0.98057	99.9884
Annotation Cluster 42	Enrichment Score: 0.7547536466957683
Category	Term	Count	%	PValue	Genes	List Total	Pop Hits	Pop Total	Fold Enrichment	Bonferroni	Benjamini	FDR
GOTERM_BP_FAT	GO:0021953~central nervous system neuron differentiation	8	1.78571	0.0563462	ARX, SLC4A10, EMX1, MDGA1, MDGA2, UNC5D, SEMA3A, PTEN	330	173	16650	2.33316	1	0.827354	66.0802
GOTERM_BP_FAT	GO:0021884~forebrain neuron development	3	0.669643	0.144806	ARX, SLC4A10, SEMA3A	330	34	16650	4.45187	1	0.916902	94.5858
GOTERM_BP_FAT	GO:0021954~central nervous system neuron development	4	0.892857	0.165434	ARX, SLC4A10, SEMA3A, PTEN	330	71	16650	2.84251	1	0.930739	96.5656
GOTERM_BP_FAT	GO:0021879~forebrain neuron differentiation	3	0.669643	0.325676	ARX, SLC4A10, SEMA3A	330	59	16650	2.56549	1	0.96997	99.9355
GOTERM_BP_FAT	GO:0021872~forebrain generation of neurons	3	0.669643	0.382975	ARX, SLC4A10, SEMA3A	330	67	16650	2.25916	1	0.980366	99.9877
Annotation Cluster 43	Enrichment Score: 0.7478083354457294
Category	Term	Count	%	PValue	Genes	List Total	Pop Hits	Pop Total	Fold Enrichment	Bonferroni	Benjamini	FDR
GOTERM_MF_FAT	GO:0051015~actin filament binding	7	1.5625	0.0523205	ACTR3, SHROOM3, MYO7A, PLS1, IQGAP2, ARPC5, CTNNA2	315	132	15478	2.60572	1	0.819712	56.154
GOTERM_MF_FAT	GO:0003779~actin binding	11	2.45536	0.282279	ACTR3, DIXDC1, SHROOM3, XIRP2, MYO7A, PLS1, IQGAP2, SYNPO2, ARPC5, CTNNA2, PLEC	315	397	15478	1.36146	1	0.930758	99.3834
GOTERM_MF_FAT	GO:0005200~structural constituent of cytoskeleton	4	0.892857	0.386567	ACTR3, PLS1, ARPC5, CTNNA2	315	110	15478	1.78678	1	0.947692	99.9446
Annotation Cluster 44	Enrichment Score: 0.7433851895411098
Category	Term	Count	%	PValue	Genes	List Total	Pop Hits	Pop Total	Fold Enrichment	Bonferroni	Benjamini	FDR
GOTERM_MF_FAT	GO:0030695~GTPase regulator activity	15	3.34821	0.0044815	DAB2IP, IQGAP2, ADPRH, ARHGEF11, RALGAPA2, ARHGAP20, RGS3, ITGB1BP1, TBCD, PLCB1, TBC1D1, AGAP1, CDC42EP3, AGAP3, ARHGAP10	315	310	15478	2.37757	0.972118	0.360759	6.6591
GOTERM_MF_FAT	GO:0060589~nucleoside-triphosphatase regulator activity	15	3.34821	0.0107188	DAB2IP, IQGAP2, ADPRH, ARHGEF11, RALGAPA2, ARHGAP20, RGS3, ITGB1BP1, TBCD, PLCB1, TBC1D1, AGAP1, CDC42EP3, AGAP3, ARHGAP10	315	343	15478	2.14883	0.999814	0.483508	15.2396
GOTERM_MF_FAT	GO:0005096~GTPase activator activity	13	2.90179	0.0118025	RALGAPA2, DAB2IP, ARHGAP20, RGS3, TBCD, TBC1D1, PLCB1, AGAP1, CDC42EP3, AGAP3, ARHGEF11, ADPRH, ARHGAP10	315	279	15478	2.28951	0.999922	0.491299	16.6529
GOTERM_BP_FAT	GO:0043087~regulation of GTPase activity	22	4.91071	0.0336915	ARHGEF3, DAB2IP, RALGPS2, TRIO, IQGAP2, DENND2A, ADPRH, ARHGEF11, RALGAPA2, ARHGAP20, FNBP1L, RGS3, ITGB1BP1, TBCD, MKKS, PLCB1, AGAP1, TBC1D1, CDC42EP3, AGAP3, BCAR3, ARHGAP10	330	691	16650	1.60637	1	0.773717	47.2132
GOTERM_BP_FAT	GO:0043547~positive regulation of GTPase activity	19	4.24107	0.0789296	ARHGEF3, DAB2IP, RALGPS2, TRIO, DENND2A, ADPRH, ARHGEF11, RALGAPA2, ARHGAP20, FNBP1L, RGS3, TBCD, PLCB1, AGAP1, TBC1D1, CDC42EP3, AGAP3, ARHGAP10, BCAR3	330	634	16650	1.51204	1	0.860397	78.4057
GOTERM_MF_FAT	GO:0008047~enzyme activator activity	14	3.125	0.20531	DAB2IP, RPTOR, ADPRH, ARHGEF11, RALGAPA2, ARHGAP20, RGS3, TBCD, PLCB1, TBC1D1, AGAP1, CDC42EP3, AGAP3, ARHGAP10	315	494	15478	1.39253	1	0.913016	97.057
GOTERM_BP_FAT	GO:0051056~regulation of small GTPase mediated signal transduction	9	2.00893	0.240608	RALGAPA2, ARHGEF3, RALGPS2, DAB2IP, ARHGAP20, PPP2CB, TRIO, ARHGEF11, ARHGAP10	330	299	16650	1.5187	1	0.955222	99.409
GOTERM_BP_FAT	GO:0007265~Ras protein signal transduction	9	2.00893	0.30022	RAP2B, RAP2A, ARHGEF3, RALGPS2, DAB2IP, PPP2CB, TRIO, CDC42EP3, ARHGEF11	330	320	16650	1.41903	1	0.968309	99.8713
GOTERM_BP_FAT	GO:0007264~small GTPase mediated signal transduction	13	2.90179	0.346918	RAP2B, RAP2A, ARHGEF3, RALGPS2, DAB2IP, DAB1, PPP2CB, TRIO, AGAP1, CDC42EP3, AGAP3, BCAR3, ARHGEF11	330	527	16650	1.24461	1	0.973771	99.9645
GOTERM_BP_FAT	GO:0046578~regulation of Ras protein signal transduction	6	1.33929	0.373469	ARHGEF3, RALGPS2, DAB2IP, PPP2CB, TRIO, ARHGEF11	330	203	16650	1.49127	1	0.979245	99.9836
GOTERM_BP_FAT	GO:0051345~positive regulation of hydrolase activity	20	4.46429	0.450939	ARHGEF3, DAB2IP, RALGPS2, AIFM1, TRIO, DENND2A, ADPRH, ARHGEF11, RALGAPA2, ARHGAP20, FNBP1L, RGS3, TBCD, PLCB1, AGAP1, TBC1D1, CDC42EP3, AGAP3, ARHGAP10, BCAR3	330	917	16650	1.10043	1	0.985847	99.9986
GOTERM_MF_FAT	GO:0098772~molecular function regulator	30	6.69643	0.477552	ANKRD36C, RALGPS2, IQGAP2, DENND2A, KCNIP4, ARHGAP20, PSMD1, SPRED2, PLCB1, TBC1D1, AGAP1, CDC42EP3, AGAP3, ARHGEF3, DAB2IP, TRIO, RPTOR, ANXA2, ARHGEF11, ADPRH, HSPBP1, RALGAPA2, NEDD4, FNBP1L, RGS3, ITGB1BP1, TBCD, LRRC66, BCAR3, ARHGAP10	315	1397	15478	1.05519	1	0.968968	99.9953
GOTERM_MF_FAT	GO:0030234~enzyme regulator activity	21	4.6875	0.552527	DAB2IP, IQGAP2, RPTOR, ANXA2, ADPRH, ARHGEF11, HSPBP1, RALGAPA2, ARHGAP20, RGS3, ITGB1BP1, TBCD, PSMD1, SPRED2, LRRC66, PLCB1, AGAP1, TBC1D1, CDC42EP3, AGAP3, ARHGAP10	315	996	15478	1.03601	1	0.97895	99.9996
GOTERM_BP_FAT	GO:0043085~positive regulation of catalytic activity	31	6.91964	0.589362	RALGPS2, SRCIN1, DENND2A, PTEN, DDR2, ARHGAP20, DAB1, PSMD1, AGAP1, PLCB1, TBC1D1, INSR, CDC42EP3, AGAP3, ARHGEF3, DAB2IP, AIFM1, ANAPC4, TRIO, RPTOR, ARHGEF11, ADPRH, RALGAPA2, EPGN, RGS3, FNBP1L, ITGB1BP1, TBCD, UBC, BCAR3, ARHGAP10	330	1559	16650	1.00327	1	0.993678	100
GOTERM_BP_FAT	GO:0044093~positive regulation of molecular function	36	8.03571	0.621706	RALGPS2, SRCIN1, NFKB1, DENND2A, PTEN, DDR2, PLCL1, ARHGAP20, DAB1, PSMD1, AGAP1, PLCB1, TBC1D1, INSR, CDC42EP3, AGAP3, ARHGEF3, DAB2IP, AIFM1, ANAPC4, TRIO, RPTOR, ANXA2, ARHGEF11, ADPRH, RALGAPA2, TRAPPC9, EPGN, RGS3, FNBP1L, EBF2, ITGB1BP1, TBCD, UBC, BCAR3, ARHGAP10	330	1840	16650	0.987154	1	0.995095	100
GOTERM_BP_FAT	GO:0065009~regulation of molecular function	55	12.2768	0.670345	SRCIN1, IQGAP2, NFKB1, DDR2, PTEN, SHB, DAB1, ARHGAP20, SLMAP, PSMD1, SPRED2, MKKS, AGAP1, PLCB1, INSR, AGAP3, DLG2, RAP2B, ARHGEF3, DAB2IP, AIFM1, ANAPC4, LRRC1, PDE4D, RPTOR, ARHGEF11, RALGAPA2, PPM1E, TRAPPC9, FNBP1L, ITGB1BP1, TBCD, UBC, PLA2G6, LRRC66, RALGPS2, PPP6R1, DENND2A, PLCL1, IGF1R, NFATC4, TBC1D1, CDC42EP3, GBA, TRIO, ADPRH, ANXA2, HSPBP1, EPGN, NEDD4, RGS3, EBF2, ZNF462, ARHGAP10,…	330	2863	16650	0.969263	1	0.996628	100
GOTERM_BP_FAT	GO:0050790~regulation of catalytic activity	45	10.0446	0.683268	RALGPS2, SRCIN1, PPP6R1, IQGAP2, NFKB1, DENND2A, DDR2, PTEN, IGF1R, SHB, DAB1, ARHGAP20, PSMD1, SPRED2, MKKS, AGAP1, TBC1D1, PLCB1, CDC42EP3, INSR, AGAP3, DLG2, GBA, RAP2B, ARHGEF3, DAB2IP, AIFM1, ANAPC4, TRIO, RPTOR, ANXA2, ARHGEF11, ADPRH, HSPBP1, RALGAPA2, PPM1E, EPGN, RGS3, FNBP1L, ITGB1BP1, TBCD, UBC, LRRC66, BCAR3, ARHGAP10	330	2357	16650	0.963282	1	0.997004	100
GOTERM_BP_FAT	GO:0051336~regulation of hydrolase activity	25	5.58036	0.719069	RALGPS2, PPP6R1, IQGAP2, DENND2A, ARHGAP20, MKKS, PLCB1, TBC1D1, AGAP1, CDC42EP3, DLG2, AGAP3, ARHGEF3, DAB2IP, AIFM1, TRIO, ARHGEF11, ADPRH, RALGAPA2, FNBP1L, RGS3, ITGB1BP1, TBCD, BCAR3, ARHGAP10	330	1337	16650	0.943428	1	0.997778	100
Annotation Cluster 45	Enrichment Score: 0.7399760762790588
Category	Term	Count	%	PValue	Genes	List Total	Pop Hits	Pop Total	Fold Enrichment	Bonferroni	Benjamini	FDR
GOTERM_MF_FAT	GO:0003777~microtubule motor activity	6	1.33929	0.0232502	DNAH14, DNAH17, DNAH2, KIF16B, KIFC3, KIF13B	315	80	15478	3.68524	1	0.627233	30.2971
GOTERM_MF_FAT	GO:0003774~motor activity	7	1.5625	0.0622546	DNAH14, DNAH17, MYO7A, DNAH2, KIF16B, KIFC3, KIF13B	315	138	15478	2.49243	1	0.850035	62.6995
GOTERM_CC_FAT	GO:0005875~microtubule associated complex	7	1.5625	0.0773038	EML2, DNAH14, DNAH17, DNAH2, KIF16B, KIFC3, KIF13B	290	149	14527	2.35337	1	0.720375	68.5141
GOTERM_BP_FAT	GO:0007018~microtubule-based movement	9	2.00893	0.0803812	ACTR3, DNAH14, DNAH17, MKKS, DNAH2, KIF16B, KIFC3, KIF13B, AP3B1	330	226	16650	2.00925	1	0.859298	79.0314
GOTERM_CC_FAT	GO:0005874~microtubule	13	2.90179	0.110872	SHROOM3, CLMP, DNAH14, DNAH17, IQGAP2, DNAH2, KIF16B, KIFC3, EML2, TRIM55, NUMA1, TBCD, KIF13B	290	404	14527	1.61191	1	0.772241	81.5097
GOTERM_CC_FAT	GO:0030286~dynein complex	3	0.669643	0.210625	DNAH14, DNAH17, DNAH2	290	43	14527	3.49487	1	0.864964	96.6533
GOTERM_BP_FAT	GO:0007017~microtubule-based process	16	3.57143	0.246973	DIXDC1, DNAH14, DNAH17, LMNA, ARPC5, KIF16B, DNAH2, KIFC3, EML2, ACTR3, NUMA1, TBCD, MKKS, PHLDB2, AP3B1, KIF13B	330	618	16650	1.30627	1	0.956385	99.4948
GOTERM_CC_FAT	GO:0005871~kinesin complex	3	0.669643	0.321286	KIF16B, KIFC3, KIF13B	290	58	14527	2.59102	1	0.879286	99.6177
GOTERM_MF_FAT	GO:0015631~tubulin binding	8	1.78571	0.388469	EML2, DIXDC1, NUMA1, TBCD, KIF16B, KIFC3, KIF13B, GLI1	315	294	15478	1.33705	1	0.947505	99.9471
GOTERM_CC_FAT	GO:0099513~polymeric cytoskeletal fiber	16	3.57143	0.429082	CLMP, SHROOM3, DNAH14, DNAH17, LMNA, IQGAP2, KIF16B, DNAH2, KIFC3, EML2, TRIM55, NUMA1, TBCD, KRT8, PLS1, KIF13B	290	704	14527	1.13848	1	0.918072	99.9681
GOTERM_CC_FAT	GO:0099512~supramolecular fiber	16	3.57143	0.429082	CLMP, SHROOM3, DNAH14, DNAH17, LMNA, IQGAP2, KIF16B, DNAH2, KIFC3, EML2, TRIM55, NUMA1, TBCD, KRT8, PLS1, KIF13B	290	704	14527	1.13848	1	0.918072	99.9681
GOTERM_CC_FAT	GO:0015630~microtubule cytoskeleton	24	5.35714	0.439219	CLMP, SHROOM3, TRIP4, DNAH14, DNAH17, IQGAP2, AK5, PDE4D, KIF16B, DNAH2, KIFC3, EML2, TRIM55, CCDC141, NUMA1, DAB1, ZFYVE26, TBCD, SLMAP, PPP2CB, PLA2G6, MKKS, CENPU, KIF13B	290	1100	14527	1.09294	1	0.919002	99.9754
GOTERM_MF_FAT	GO:0008017~microtubule binding	6	1.33929	0.458529	EML2, NUMA1, KIF16B, KIFC3, KIF13B, GLI1	315	219	15478	1.34621	1	0.965677	99.9918
Annotation Cluster 46	Enrichment Score: 0.7373141185097781
Category	Term	Count	%	PValue	Genes	List Total	Pop Hits	Pop Total	Fold Enrichment	Bonferroni	Benjamini	FDR
GOTERM_CC_FAT	GO:0099572~postsynaptic specialization	7	1.5625	0.16122	GRM5, DAB1, SRCIN1, PCLO, DLG2, LRRC7, CTNNA2	290	184	14527	1.90572	1	0.828241	91.996
GOTERM_CC_FAT	GO:0014069~postsynaptic density	7	1.5625	0.16122	GRM5, DAB1, SRCIN1, PCLO, DLG2, LRRC7, CTNNA2	290	184	14527	1.90572	1	0.828241	91.996
GOTERM_CC_FAT	GO:0060076~excitatory synapse	7	1.5625	0.199594	GRM5, DAB1, SRCIN1, PCLO, DLG2, LRRC7, CTNNA2	290	197	14527	1.77996	1	0.858016	95.915
GOTERM_CC_FAT	GO:0098794~postsynapse	11	2.45536	0.216649	GRM5, KCNJ4, GPHN, DAB1, SRCIN1, GRIK1, PTEN, PCLO, DLG2, LRRC7, CTNNA2	290	376	14527	1.46549	1	0.859901	97.002
Annotation Cluster 47	Enrichment Score: 0.7214949390046832
Category	Term	Count	%	PValue	Genes	List Total	Pop Hits	Pop Total	Fold Enrichment	Bonferroni	Benjamini	FDR
GOTERM_BP_FAT	GO:0034330~cell junction organization	11	2.45536	0.0266046	XIRP2, ITGB1BP1, TBCD, CDH18, PTEN, LSR, PHLDB2, CDH10, PLEC, KIFC3, NPHP1	330	249	16650	2.22892	1	0.750515	39.5096
GOTERM_BP_FAT	GO:0045216~cell-cell junction organization	10	2.23214	0.0296354	XIRP2, ITGB1BP1, TBCD, CDH18, PTEN, LSR, PHLDB2, CDH10, KIFC3, NPHP1	330	218	16650	2.31443	1	0.767254	42.926
GOTERM_BP_FAT	GO:0051895~negative regulation of focal adhesion assembly	3	0.669643	0.038919	ITGB1BP1, PTEN, PHLDB2	330	16	16650	9.46023	1	0.789283	52.2901
GOTERM_BP_FAT	GO:1903392~negative regulation of adherens junction organization	3	0.669643	0.0435439	ITGB1BP1, PTEN, PHLDB2	330	17	16650	8.90374	1	0.794201	56.3932
GOTERM_BP_FAT	GO:1901889~negative regulation of cell junction assembly	3	0.669643	0.0638758	ITGB1BP1, PTEN, PHLDB2	330	21	16650	7.20779	1	0.844672	70.7859
GOTERM_BP_FAT	GO:0010812~negative regulation of cell-substrate adhesion	4	0.892857	0.0832899	ITGB1BP1, TBCD, PTEN, PHLDB2	330	52	16650	3.88112	1	0.863308	80.2339
GOTERM_BP_FAT	GO:0034332~adherens junction organization	6	1.33929	0.087151	ITGB1BP1, TBCD, CDH18, PTEN, PHLDB2, CDH10	330	119	16650	2.54393	1	0.867252	81.7295
GOTERM_BP_FAT	GO:0001953~negative regulation of cell-matrix adhesion	3	0.669643	0.124618	ITGB1BP1, PTEN, PHLDB2	330	31	16650	4.8827	1	0.900085	91.6355
GOTERM_BP_FAT	GO:0034333~adherens junction assembly	4	0.892857	0.146508	ITGB1BP1, TBCD, PTEN, PHLDB2	330	67	16650	3.01221	1	0.918709	94.7831
GOTERM_BP_FAT	GO:1901888~regulation of cell junction assembly	4	0.892857	0.170274	ITGB1BP1, PTEN, PHLDB2, NPHP1	330	72	16650	2.80303	1	0.935179	96.9185
GOTERM_BP_FAT	GO:0034329~cell junction assembly	7	1.5625	0.180969	ITGB1BP1, TBCD, PTEN, LSR, PHLDB2, PLEC, NPHP1	330	192	16650	1.83949	1	0.939581	97.5805
GOTERM_BP_FAT	GO:0007044~cell-substrate junction assembly	4	0.892857	0.246859	ITGB1BP1, PTEN, PHLDB2, PLEC	330	87	16650	2.31975	1	0.956679	99.4934
GOTERM_BP_FAT	GO:0051893~regulation of focal adhesion assembly	3	0.669643	0.259748	ITGB1BP1, PTEN, PHLDB2	330	50	16650	3.02727	1	0.960624	99.6328
GOTERM_BP_FAT	GO:0090109~regulation of cell-substrate junction assembly	3	0.669643	0.259748	ITGB1BP1, PTEN, PHLDB2	330	50	16650	3.02727	1	0.960624	99.6328
GOTERM_BP_FAT	GO:1903391~regulation of adherens junction organization	3	0.669643	0.274453	ITGB1BP1, PTEN, PHLDB2	330	52	16650	2.91084	1	0.963255	99.7474
GOTERM_BP_FAT	GO:0048041~focal adhesion assembly	3	0.669643	0.311109	ITGB1BP1, PTEN, PHLDB2	330	57	16650	2.6555	1	0.96873	99.9039
GOTERM_BP_FAT	GO:0007045~cell-substrate adherens junction assembly	3	0.669643	0.311109	ITGB1BP1, PTEN, PHLDB2	330	57	16650	2.6555	1	0.96873	99.9039
GOTERM_BP_FAT	GO:0001952~regulation of cell-matrix adhesion	3	0.669643	0.551397	ITGB1BP1, PTEN, PHLDB2	330	93	16650	1.62757	1	0.99159	100
GOTERM_BP_FAT	GO:0007162~negative regulation of cell adhesion	5	1.11607	0.631672	DAB1, ITGB1BP1, TBCD, PTEN, PHLDB2	330	219	16650	1.15193	1	0.995479	100
GOTERM_BP_FAT	GO:0010810~regulation of cell-substrate adhesion	4	0.892857	0.690236	ITGB1BP1, TBCD, PTEN, PHLDB2	330	179	16650	1.12748	1	0.997184	100
GOTERM_BP_FAT	GO:0031589~cell-substrate adhesion	5	1.11607	0.857973	SRCIN1, ITGB1BP1, TBCD, PTEN, PHLDB2	330	306	16650	0.824421	1	0.999717	100
GOTERM_BP_FAT	GO:0030155~regulation of cell adhesion	10	2.23214	0.893034	ZBTB7B, SHB, DAB1, ITGB1BP1, TBCD, PTPRR, TGM2, PTEN, PHLDB2, AP3B1	330	643	16650	0.784674	1	0.999874	100
GOTERM_BP_FAT	GO:0007160~cell-matrix adhesion	3	0.669643	0.895827	ITGB1BP1, PTEN, PHLDB2	330	192	16650	0.788352	1	0.999881	100
Annotation Cluster 48	Enrichment Score: 0.7114882241372241
Category	Term	Count	%	PValue	Genes	List Total	Pop Hits	Pop Total	Fold Enrichment	Bonferroni	Benjamini	FDR
GOTERM_MF_FAT	GO:0051119~sugar transmembrane transporter activity	3	0.669643	0.136971	SLC2A13, SLC45A4, SLC2A1	315	32	15478	4.60655	1	0.92639	89.5655
GOTERM_BP_FAT	GO:0008643~carbohydrate transport	6	1.33929	0.206839	SLC2A13, SLC45A4, SLC2A1, PLS1, FGF21, INSR	330	159	16650	1.90395	1	0.94697	98.6699
GOTERM_MF_FAT	GO:1901476~carbohydrate transporter activity	3	0.669643	0.224333	SLC2A13, SLC45A4, SLC2A1	315	44	15478	3.35022	1	0.915336	97.9707
GOTERM_MF_FAT	GO:0015144~carbohydrate transmembrane transporter activity	3	0.669643	0.224333	SLC2A13, SLC45A4, SLC2A1	315	44	15478	3.35022	1	0.915336	97.9707
Annotation Cluster 49	Enrichment Score: 0.7051320881465344
Category	Term	Count	%	PValue	Genes	List Total	Pop Hits	Pop Total	Fold Enrichment	Bonferroni	Benjamini	FDR
GOTERM_CC_FAT	GO:0005774~vacuolar membrane	19	4.24107	0.0627132	RAP2B, SCAMP1, TM9SF2, RAP2A, SYT5, MYO7A, SNX16, SYT7, KIF16B, RPTOR, ANXA2, EPS15, LNPEP, STX12, ZFYVE26, UBC, INSR, GBA, AP3B1	290	610	14527	1.56028	1	0.678808	60.5554
GOTERM_CC_FAT	GO:0044437~vacuolar part	20	4.46429	0.126516	RAP2B, SCAMP1, TM9SF2, RAP2A, SYT5, MYO7A, SNX16, SYT7, KIF16B, RPTOR, ANXA2, EPS15, GPC4, LNPEP, STX12, ZFYVE26, UBC, INSR, GBA, AP3B1	290	718	14527	1.39535	1	0.794297	85.6714
GOTERM_CC_FAT	GO:0005773~vacuole	30	6.69643	0.169128	LEPROTL1, SYT5, CPQ, MYO7A, SNX16, ASTN1, ASTN2, SYT7, LNPEP, GPC4, TMEM127, STX12, INSR, GBA, AP3B1, GPR107, RAP2B, STX6, SCAMP1, RAP2A, NMNAT2, TM9SF2, KIF16B, CAPN2, RPTOR, ANXA2, EPS15, ZFYVE26, UBC, GLB1L3	290	1212	14527	1.23993	1	0.837884	93.0142
GOTERM_CC_FAT	GO:0044440~endosomal part	13	2.90179	0.170317	EPS15, LNPEP, SCAMP1, RAP2B, TM9SF2, RAP2A, STX12, SYT5, SNX16, UBC, KIF16B, INSR, ANXA2	290	441	14527	1.47667	1	0.834297	93.1564
GOTERM_CC_FAT	GO:0010008~endosome membrane	12	2.67857	0.189154	EPS15, SCAMP1, RAP2B, TM9SF2, RAP2A, STX12, SYT5, SNX16, UBC, KIF16B, INSR, ANXA2	290	407	14527	1.47695	1	0.851401	95.0793
GOTERM_CC_FAT	GO:0005765~lysosomal membrane	9	2.00893	0.221635	LNPEP, ZFYVE26, MYO7A, UBC, SYT7, RPTOR, ANXA2, GBA, AP3B1	290	290	14527	1.55461	1	0.849334	97.2647
GOTERM_CC_FAT	GO:0098852~lytic vacuole membrane	9	2.00893	0.221635	LNPEP, ZFYVE26, MYO7A, UBC, SYT7, RPTOR, ANXA2, GBA, AP3B1	290	290	14527	1.55461	1	0.849334	97.2647
GOTERM_CC_FAT	GO:0005768~endosome	20	4.46429	0.262926	STX6, RAP2B, SCAMP1, TM9SF2, NMNAT2, RAP2A, LEPROTL1, SYT5, SNX16, ASTN1, KIF16B, ASTN2, ANXA2, EPS15, LNPEP, STX12, TMEM127, UBC, INSR, GPR107	290	811	14527	1.23534	1	0.857055	98.7498
GOTERM_CC_FAT	GO:0005764~lysosome	13	2.90179	0.398922	MYO7A, CPQ, SNX16, SYT7, CAPN2, RPTOR, ANXA2, GPC4, LNPEP, ZFYVE26, UBC, AP3B1, GBA	290	544	14527	1.19708	1	0.915803	99.9332
GOTERM_CC_FAT	GO:0000323~lytic vacuole	13	2.90179	0.398922	MYO7A, CPQ, SNX16, SYT7, CAPN2, RPTOR, ANXA2, GPC4, LNPEP, ZFYVE26, UBC, AP3B1, GBA	290	544	14527	1.19708	1	0.915803	99.9332
Annotation Cluster 50	Enrichment Score: 0.7005144903041196
Category	Term	Count	%	PValue	Genes	List Total	Pop Hits	Pop Total	Fold Enrichment	Bonferroni	Benjamini	FDR
GOTERM_BP_FAT	GO:0023051~regulation of signaling	77	17.1875	0.0185341	GRIK1, NFKB1, SYT7, SGMS1, PTEN, LGR5, CITED1, ZNRF3, GLI1, SHB, ARHGAP20, DAB1, SLC1A3, SLC2A1, PSMD1, SPRED2, MGLL, PDE8A, PLCB1, INSR, WWOX, CDK14, ARHGEF3, RAP2A, DAB2IP, ELP2, CNTNAP4, MINOS1-NBL1, PTPRR, PDE4D, FGF21, KIF16B, MECOM, RPTOR, ARHGEF11, GRM5, RALGAPA2, INHBE, ATP2C1, ITGB1BP1, UBC, MNT, TNNI3K, PLA2G6, LRRC66, MCC, ADAMTS3, RALGPS2, GCLC, UBE3A, FPGT-TNNI3K, CXXC5, IGF1R, PLCL1…	330	3070	16650	1.26547	1	0.70002	29.4437
GOTERM_BP_FAT	GO:0010646~regulation of cell communication	74	16.5179	0.0342804	GRIK1, NFKB1, SYT7, SGMS1, PTEN, LGR5, CITED1, ZNRF3, GLI1, SHB, ARHGAP20, DAB1, SLC1A3, SLC2A1, PSMD1, SPRED2, MGLL, PDE8A, PLCB1, INSR, WWOX, CDK14, ARHGEF3, RAP2A, DAB2IP, ELP2, CNTNAP4, MINOS1-NBL1, PTPRR, PDE4D, FGF21, MECOM, RPTOR, ARHGEF11, GRM5, RALGAPA2, INHBE, ATP2C1, ITGB1BP1, UBC, MNT, PLA2G6, LRRC66, MCC, ADAMTS3, RALGPS2, GCLC, UBE3A, CXXC5, IGF1R, PLCL1, TMEM127, PPP2CB, TGM2, NFAT…	330	3020	16650	1.2363	1	0.772638	47.8096
GOTERM_BP_FAT	GO:0009966~regulation of signal transduction	67	14.9554	0.0431795	NFKB1, SGMS1, PTEN, LGR5, CITED1, ZNRF3, GLI1, SHB, DAB1, ARHGAP20, PSMD1, SPRED2, MGLL, PDE8A, PLCB1, INSR, WWOX, CDK14, ARHGEF3, RAP2A, DAB2IP, ELP2, MINOS1-NBL1, PTPRR, PDE4D, FGF21, MECOM, RPTOR, ARHGEF11, RALGAPA2, INHBE, ATP2C1, ITGB1BP1, UBC, MNT, PLA2G6, LRRC66, MCC, ADAMTS3, RALGPS2, GCLC, UBE3A, CXXC5, IGF1R, TMEM127, PPP2CB, NFAT5, TGM2, OTUD7B, NFATC4, FBN2, MYOF, BCL9, GBA, TAF2, DIX…	330	2728	16650	1.23917	1	0.794222	56.0825
GOTERM_BP_FAT	GO:0007166~cell surface receptor signaling pathway	62	13.8393	0.12051	GRIK1, NFKB1, SGMS1, LGR5, DDR2, PTEN, ZNRF3, CITED1, GLI1, GPC4, LNPEP, ACTR3, SHB, PSMD1, SPRED2, MKKS, SEMA3A, PLCB1, INSR, USP15, WWOX, CDK14, DAB2IP, MINOS1-NBL1, PTPRR, TLE3, PDE4D, KIF16B, FGF21, GRM5, INHBE, ITGB1BP1, UBC, PLA2G6, CNTN1, LRRC66, PPM1L, MCC, ADAMTS3, GCLC, FUT8, ARPC5, IGF1R, KRT8, TGM2, NFATC4, FBN2, MAML3, BCL9, DIXDC1, BAIAP2L2, LMNA, TRIO, FZD3, NOTCH3, EPS15, SEMA6A, …	330	2669	16650	1.17204	1	0.895691	90.8727
GOTERM_BP_FAT	GO:0023056~positive regulation of signaling	35	7.8125	0.303191	UBE3A, NFKB1, CXXC5, PTEN, LGR5, CITED1, GLI1, SHB, SLC1A3, PSMD1, SPRED2, TGM2, NFATC4, PDE8A, PLCB1, INSR, WWOX, GBA, DIXDC1, DAB2IP, FGF21, RPTOR, ANXA2, EPS15, EPGN, NEDD4, INHBE, ATP2C1, ITGB1BP1, UBC, PLA2G6, ADAMTS3, RBPJ, BCAR3, SH3BP2	330	1563	16650	1.12982	1	0.968075	99.8811
GOTERM_BP_FAT	GO:0031401~positive regulation of protein modification process	26	5.80357	0.327044	SRCIN1, UBE3A, PAXBP1, PTEN, DDR2, DAB1, PSMD1, PDE8A, PLCB1, INSR, GBA, RAP2B, RAP2A, DAB2IP, ANAPC4, FGF21, RPTOR, ANXA2, HSPBP1, INHBE, EPGN, ITGB1BP1, UBC, CNTN1, PLA2G6, BCAR3	330	1143	16650	1.1477	1	0.970057	99.9379
GOTERM_BP_FAT	GO:0009967~positive regulation of signal transduction	31	6.91964	0.390143	UBE3A, NFKB1, CXXC5, PTEN, LGR5, CITED1, GLI1, SHB, PSMD1, SPRED2, TGM2, NFATC4, PDE8A, PLCB1, INSR, WWOX, DIXDC1, DAB2IP, FGF21, RPTOR, EPGN, NEDD4, INHBE, ATP2C1, ITGB1BP1, UBC, PLA2G6, ADAMTS3, RBPJ, SH3BP2, BCAR3	330	1428	16650	1.0953	1	0.980552	99.9901
GOTERM_BP_FAT	GO:0010647~positive regulation of cell communication	33	7.36607	0.431499	UBE3A, NFKB1, CXXC5, PTEN, LGR5, CITED1, GLI1, SHB, SLC1A3, PSMD1, SPRED2, TGM2, NFATC4, PDE8A, PLCB1, INSR, WWOX, GBA, DIXDC1, DAB2IP, FGF21, RPTOR, EPGN, NEDD4, INHBE, ATP2C1, ITGB1BP1, UBC, PLA2G6, ADAMTS3, RBPJ, BCAR3, SH3BP2	330	1555	16650	1.07074	1	0.984298	99.9973
GOTERM_BP_FAT	GO:0051247~positive regulation of protein metabolic process	30	6.69643	0.590038	GCLC, SRCIN1, UBE3A, PAXBP1, PTEN, DDR2, DAB1, PSMD1, PDE8A, PLCB1, INSR, GBA, RAP2B, RAP2A, DAB2IP, AIFM1, ANAPC4, FGF21, RPTOR, ANXA2, HSPBP1, RNF114, EPGN, NEDD4, INHBE, ITGB1BP1, UBC, CNTN1, PLA2G6, BCAR3	330	1508	16650	1.00374	1	0.993693	100
GOTERM_BP_FAT	GO:1902533~positive regulation of intracellular signal transduction	17	3.79464	0.728761	DAB2IP, UBE3A, CXXC5, FGF21, PTEN, RPTOR, EPGN, NEDD4, ATP2C1, ITGB1BP1, TGM2, UBC, SPRED2, PLA2G6, PDE8A, PLCB1, INSR	330	915	16650	0.937407	1	0.997953	100
GOTERM_BP_FAT	GO:0048584~positive regulation of response to stimulus	36	8.03571	0.82991	IL16, UBE3A, NFKB1, CXXC5, ARPC5, LGR5, PTEN, CITED1, GLI1, ACTR3, SHB, PSMD1, SPRED2, TGM2, NFATC4, PDE8A, PLCB1, INSR, WWOX, DIXDC1, DAB2IP, COLEC10, PDE4D, FGF21, RPTOR, EPGN, NEDD4, INHBE, ATP2C1, ITGB1BP1, UBC, PLA2G6, ADAMTS3, RBPJ, BCAR3, SH3BP2	330	2030	16650	0.89476	1	0.999484	100
Annotation Cluster 51	Enrichment Score: 0.6767827976218227
Category	Term	Count	%	PValue	Genes	List Total	Pop Hits	Pop Total	Fold Enrichment	Bonferroni	Benjamini	FDR
GOTERM_BP_FAT	GO:0007411~axon guidance	10	2.23214	0.033541	ALCAM, ARX, SEMA6A, LAMB2, ZNF280D, UNC5D, FZD3, SEMA3A, EXT1, APBB2	330	223	16650	2.26254	1	0.77574	47.0597
GOTERM_BP_FAT	GO:0097485~neuron projection guidance	10	2.23214	0.0346622	ALCAM, ARX, SEMA6A, LAMB2, ZNF280D, UNC5D, FZD3, SEMA3A, EXT1, APBB2	330	224	16650	2.25244	1	0.772981	48.193
GOTERM_BP_FAT	GO:1902284~neuron projection extension involved in neuron projection guidance	3	0.669643	0.186889	ALCAM, SEMA6A, SEMA3A	330	40	16650	3.78409	1	0.939942	97.8865
GOTERM_BP_FAT	GO:0048846~axon extension involved in axon guidance	3	0.669643	0.186889	ALCAM, SEMA6A, SEMA3A	330	40	16650	3.78409	1	0.939942	97.8865
GOTERM_BP_FAT	GO:1990138~neuron projection extension	5	1.11607	0.304268	ALCAM, SEMA6A, LAMB2, EMX1, SEMA3A	330	141	16650	1.78917	1	0.967528	99.8844
GOTERM_BP_FAT	GO:0048675~axon extension	4	0.892857	0.349205	ALCAM, SEMA6A, LAMB2, SEMA3A	330	106	16650	1.90395	1	0.974157	99.9667
GOTERM_BP_FAT	GO:0048588~developmental cell growth	5	1.11607	0.511467	ALCAM, SEMA6A, LAMB2, EMX1, SEMA3A	330	188	16650	1.34188	1	0.989395	99.9998
GOTERM_BP_FAT	GO:0060560~developmental growth involved in morphogenesis	5	1.11607	0.57965	ALCAM, SEMA6A, LAMB2, EMX1, SEMA3A	330	205	16650	1.2306	1	0.993213	100
GOTERM_BP_FAT	GO:0016049~cell growth	9	2.00893	0.633923	ALCAM, SEMA6A, LAMB2, EMX1, OSGIN1, SEMA3A, SGMS1, APBB2, RPTOR	330	436	16650	1.04149	1	0.995468	100
Annotation Cluster 52	Enrichment Score: 0.6504978967108264
Category	Term	Count	%	PValue	Genes	List Total	Pop Hits	Pop Total	Fold Enrichment	Bonferroni	Benjamini	FDR
GOTERM_BP_FAT	GO:0006367~transcription initiation from RNA polymerase II promoter	8	1.78571	0.0577808	NOTCH3, ATF7IP, TAF2, MAML3, HNF4G, RBPJ, NR5A2, NR2F1	330	174	16650	2.31975	1	0.828587	67.0287
GOTERM_BP_FAT	GO:0043401~steroid hormone mediated signaling pathway	8	1.78571	0.0667945	TRIP4, NEDD4, UBE3A, PGRMC2, ARID1A, HNF4G, NR5A2, NR2F1	330	180	16650	2.24242	1	0.852075	72.438
GOTERM_BP_FAT	GO:0071383~cellular response to steroid hormone stimulus	9	2.00893	0.106121	TRIP4, NEDD4, UBE3A, AIFM1, PGRMC2, ARID1A, HNF4G, NR5A2, NR2F1	330	241	16650	1.88419	1	0.883428	87.6482
GOTERM_MF_FAT	GO:0003707~steroid hormone receptor activity	4	0.892857	0.117707	PGRMC2, HNF4G, NR5A2, NR2F1	315	59	15478	3.33129	1	0.927672	85.359
GOTERM_BP_FAT	GO:0009755~hormone-mediated signaling pathway	8	1.78571	0.149732	TRIP4, NEDD4, UBE3A, PGRMC2, ARID1A, HNF4G, NR5A2, NR2F1	330	221	16650	1.82641	1	0.921162	95.1385
GOTERM_BP_FAT	GO:0006352~DNA-templated transcription, initiation	8	1.78571	0.173684	NOTCH3, ATF7IP, TAF2, MAML3, HNF4G, RBPJ, NR5A2, NR2F1	330	231	16650	1.74734	1	0.935919	97.1462
GOTERM_BP_FAT	GO:0071396~cellular response to lipid	14	3.125	0.208499	DAB2IP, TRIP4, AIFM1, UBE3A, ARID1A, PDE4D, NFKB1, SGMS1, HNF4G, NEDD4, PGRMC2, BRINP3, NR5A2, NR2F1	330	509	16650	1.38775	1	0.947888	98.7209
GOTERM_BP_FAT	GO:0032870~cellular response to hormone stimulus	16	3.57143	0.238019	TRIP4, GCLC, BAIAP2L2, UBE3A, AIFM1, ARID1A, NFKB1, FGF21, HNF4G, IGF1R, NEDD4, PGRMC2, MKKS, NR5A2, INSR, NR2F1	330	616	16650	1.31051	1	0.955409	99.3702
GOTERM_MF_FAT	GO:0004879~RNA polymerase II transcription factor activity, ligand-activated sequence-specific DNA binding	3	0.669643	0.246907	HNF4G, NR5A2, NR2F1	315	47	15478	3.13637	1	0.91427	98.7101
GOTERM_MF_FAT	GO:0098531~transcription factor activity, direct ligand regulated sequence-specific DNA binding	3	0.669643	0.246907	HNF4G, NR5A2, NR2F1	315	47	15478	3.13637	1	0.91427	98.7101
GOTERM_BP_FAT	GO:0030522~intracellular receptor signaling pathway	8	1.78571	0.26025	TRIP4, NEDD4, UBE3A, UBC, ARID1A, HNF4G, NR5A2, NR2F1	330	261	16650	1.5465	1	0.960578	99.6374
GOTERM_BP_FAT	GO:0071407~cellular response to organic cyclic compound	13	2.90179	0.333921	TRIP4, GCLC, CYP1A1, AIFM1, UBE3A, PDE4D, ARID1A, NFKB1, HNF4G, NEDD4, PGRMC2, NR5A2, NR2F1	330	520	16650	1.26136	1	0.971809	99.9487
GOTERM_BP_FAT	GO:0048545~response to steroid hormone	10	2.23214	0.340415	TRIP4, NEDD4, UBE3A, AIFM1, PGRMC2, ARID1A, HNF4G, NR5A2, GBA, NR2F1	330	381	16650	1.32427	1	0.972911	99.9573
GOTERM_BP_FAT	GO:0009725~response to hormone	19	4.24107	0.442559	TRIP4, GCLC, BAIAP2L2, UBE3A, AIFM1, NFKB1, ARID1A, HNF4G, FGF21, CITED1, ANXA2, IGF1R, NEDD4, PGRMC2, MKKS, NR5A2, INSR, NR2F1, GBA	330	854	16650	1.12253	1	0.985454	99.9981
GOTERM_BP_FAT	GO:0030518~intracellular steroid hormone receptor signaling pathway	4	0.892857	0.460404	TRIP4, NEDD4, UBE3A, ARID1A	330	127	16650	1.58912	1	0.986428	99.999
GOTERM_BP_FAT	GO:0033993~response to lipid	18	4.01786	0.535104	DAB2IP, TRIP4, CYP1A1, UBE3A, AIFM1, NFKB1, ARID1A, PDE4D, HNF4G, SGMS1, PTEN, CITED1, NEDD4, PGRMC2, BRINP3, NR5A2, NR2F1, GBA	330	860	16650	1.05603	1	0.990793	99.9999
GOTERM_BP_FAT	GO:0014070~response to organic cyclic compound	17	3.79464	0.714436	TAF2, GCLC, TRIP4, CYP1A1, UBE3A, AIFM1, NFKB1, ARID1A, PDE4D, HNF4G, PTEN, CITED1, NEDD4, PGRMC2, NR5A2, NR2F1, GBA	330	906	16650	0.946719	1	0.997762	100
Annotation Cluster 53	Enrichment Score: 0.6432467469133339
Category	Term	Count	%	PValue	Genes	List Total	Pop Hits	Pop Total	Fold Enrichment	Bonferroni	Benjamini	FDR
GOTERM_BP_FAT	GO:0048639~positive regulation of developmental growth	7	1.5625	0.100234	ARX, PLS1, MKKS, ZFPM2, RBPJ, PLCB1, INSR	330	161	16650	2.19368	1	0.871538	86.0403
GOTERM_BP_FAT	GO:0048638~regulation of developmental growth	10	2.23214	0.147707	ARX, SEMA6A, PLS1, MKKS, ZFPM2, SEMA3A, RBPJ, PLCB1, PTEN, INSR	330	303	16650	1.66517	1	0.919725	94.9182
GOTERM_BP_FAT	GO:0045927~positive regulation of growth	8	1.78571	0.215835	ARX, PLS1, MKKS, ZFPM2, RBPJ, PLCB1, INSR, RPTOR	330	246	16650	1.6408	1	0.948786	98.9247
GOTERM_BP_FAT	GO:0003007~heart morphogenesis	7	1.5625	0.303475	ERG, NEDD4, XIRP2, MKKS, ZFPM2, RBPJ, INSR	330	230	16650	1.53557	1	0.967944	99.882
GOTERM_MF_FAT	GO:0001085~RNA polymerase II transcription factor binding	3	0.669643	0.626765	MKKS, ZFPM2, RBPJ	315	104	15478	1.4174	1	0.987879	100
Annotation Cluster 54	Enrichment Score: 0.6420341068848708
Category	Term	Count	%	PValue	Genes	List Total	Pop Hits	Pop Total	Fold Enrichment	Bonferroni	Benjamini	FDR
GOTERM_MF_FAT	GO:0003774~motor activity	7	1.5625	0.0622546	DNAH14, DNAH17, MYO7A, DNAH2, KIF16B, KIFC3, KIF13B	315	138	15478	2.49243	1	0.850035	62.6995
GOTERM_MF_FAT	GO:0032559~adenyl ribonucleotide binding	39	8.70536	0.109037	RAD51B, GCLC, DNAH14, DNAH17, MYO7A, TDRD9, FPGT-TNNI3K, IARS2, DNAH2, DDR2, KIFC3, ACTR3, IGF1R, GPHN, DGKB, SYN2, TGM2, MKKS, RTEL1-TNFRSF6B, IPMK, SPATA5, INSR, CDK14, RTEL1, SIK3, KIF13B, NMNAT2, YARS, PDXK, TRIO, PDE4D, AK5, KIF16B, MAST1, NAV2, ATP2C1, DDX59, TNNI3K, ZRANB3	315	1531	15478	1.25168	1	0.938478	82.9893
GOTERM_MF_FAT	GO:0005524~ATP binding	38	8.48214	0.118148	RAD51B, GCLC, DNAH14, DNAH17, MYO7A, TDRD9, FPGT-TNNI3K, IARS2, DNAH2, DDR2, KIFC3, ACTR3, IGF1R, GPHN, DGKB, SYN2, TGM2, MKKS, RTEL1-TNFRSF6B, IPMK, SPATA5, INSR, CDK14, RTEL1, SIK3, KIF13B, NMNAT2, YARS, PDXK, TRIO, AK5, KIF16B, MAST1, NAV2, ATP2C1, DDX59, TNNI3K, ZRANB3	315	1495	15478	1.24895	1	0.923421	85.4711
GOTERM_MF_FAT	GO:0030554~adenyl nucleotide binding	39	8.70536	0.120115	RAD51B, GCLC, DNAH14, DNAH17, MYO7A, TDRD9, FPGT-TNNI3K, IARS2, DNAH2, DDR2, KIFC3, ACTR3, IGF1R, GPHN, DGKB, SYN2, TGM2, MKKS, RTEL1-TNFRSF6B, IPMK, SPATA5, INSR, CDK14, RTEL1, SIK3, KIF13B, NMNAT2, YARS, PDXK, TRIO, PDE4D, AK5, KIF16B, MAST1, NAV2, ATP2C1, DDX59, TNNI3K, ZRANB3	315	1542	15478	1.24275	1	0.921893	85.9602
GOTERM_MF_FAT	GO:0032553~ribonucleotide binding	46	10.2679	0.150587	RAD51B, GCLC, DNAH14, DNAH17, MYO7A, TDRD9, FPGT-TNNI3K, IARS2, DNAH2, DDR2, KIFC3, ACTR3, IGF1R, GPHN, DGKB, PDE1A, SYN2, TGM2, MKKS, RTEL1-TNFRSF6B, AGAP1, IPMK, SPATA5, INSR, AGAP3, CDK14, RTEL1, SIK3, KIF13B, RAP2B, RAP2A, NMNAT2, YARS, PDXK, TRIO, PDE4D, AK5, KIF16B, NDOR1, MAST1, NAV2, ATP2C1, DDX59, TNNI3K, ZRANB3, GBP3	315	1900	15478	1.18962	1	0.921961	91.8246
GOTERM_MF_FAT	GO:0032555~purine ribonucleotide binding	45	10.0446	0.17767	RAD51B, GCLC, DNAH14, DNAH17, MYO7A, TDRD9, FPGT-TNNI3K, IARS2, DNAH2, DDR2, KIFC3, ACTR3, IGF1R, GPHN, DGKB, PDE1A, SYN2, TGM2, MKKS, RTEL1-TNFRSF6B, AGAP1, IPMK, SPATA5, INSR, AGAP3, CDK14, RTEL1, SIK3, KIF13B, RAP2B, RAP2A, NMNAT2, YARS, PDXK, TRIO, PDE4D, AK5, KIF16B, MAST1, NAV2, ATP2C1, DDX59, TNNI3K, ZRANB3, GBP3	315	1884	15478	1.17364	1	0.912489	95.0272
GOTERM_MF_FAT	GO:0016887~ATPase activity	13	2.90179	0.184598	ATF7IP, RAD51B, ATP2C1, DNAH17, MYO7A, DDX59, TDRD9, KIF16B, DNAH2, RTEL1-TNFRSF6B, RTEL1, KIFC3, KIF13B	315	439	15478	1.45507	1	0.914936	95.6326
GOTERM_MF_FAT	GO:0017076~purine nucleotide binding	45	10.0446	0.190135	RAD51B, GCLC, DNAH14, DNAH17, MYO7A, TDRD9, FPGT-TNNI3K, IARS2, DNAH2, DDR2, KIFC3, ACTR3, IGF1R, GPHN, DGKB, PDE1A, SYN2, TGM2, MKKS, RTEL1-TNFRSF6B, AGAP1, IPMK, SPATA5, INSR, AGAP3, CDK14, RTEL1, SIK3, KIF13B, RAP2B, RAP2A, NMNAT2, YARS, PDXK, TRIO, PDE4D, AK5, KIF16B, MAST1, NAV2, ATP2C1, DDX59, TNNI3K, ZRANB3, GBP3	315	1897	15478	1.1656	1	0.909382	96.0661
GOTERM_MF_FAT	GO:0097367~carbohydrate derivative binding	52	11.6071	0.205414	RAD51B, MYO7A, IARS2, DDR2, KIFC3, GPC4, ACTR3, SHB, MKKS, AGAP1, RTEL1-TNFRSF6B, IPMK, INSR, AGAP3, CDK14, RTEL1, SIK3, KIF13B, RAP2B, NMNAT2, RAP2A, YARS, PDXK, PDE4D, KIF16B, MAST1, NAV2, ATP2C1, CNTN1, TNNI3K, ADAMTS3, GBP3, GCLC, DNAH14, DNAH17, TDRD9, FPGT-TNNI3K, DNAH2, IGF1R, GPHN, DGKB, PDE1A, SYN2, TGM2, SPATA5, TRIO, AK5, NDOR1, PLEKHA8, DDX59, ZRANB3, LIPC	315	2241	15478	1.14016	1	0.9103	97.0629
GOTERM_MF_FAT	GO:0035639~purine ribonucleoside triphosphate binding	43	9.59821	0.229255	RAD51B, GCLC, DNAH14, DNAH17, MYO7A, TDRD9, FPGT-TNNI3K, IARS2, DNAH2, DDR2, KIFC3, ACTR3, IGF1R, GPHN, DGKB, SYN2, TGM2, MKKS, RTEL1-TNFRSF6B, AGAP1, IPMK, SPATA5, INSR, AGAP3, CDK14, RTEL1, SIK3, KIF13B, RAP2B, RAP2A, NMNAT2, YARS, PDXK, TRIO, AK5, KIF16B, MAST1, NAV2, ATP2C1, DDX59, TNNI3K, ZRANB3, GBP3	315	1841	15478	1.14768	1	0.917952	98.1595
GOTERM_MF_FAT	GO:0032550~purine ribonucleoside binding	43	9.59821	0.239281	RAD51B, GCLC, DNAH14, DNAH17, MYO7A, TDRD9, FPGT-TNNI3K, IARS2, DNAH2, DDR2, KIFC3, ACTR3, IGF1R, GPHN, DGKB, SYN2, TGM2, MKKS, RTEL1-TNFRSF6B, AGAP1, IPMK, SPATA5, INSR, AGAP3, CDK14, RTEL1, SIK3, KIF13B, RAP2B, RAP2A, NMNAT2, YARS, PDXK, TRIO, AK5, KIF16B, MAST1, NAV2, ATP2C1, DDX59, TNNI3K, ZRANB3, GBP3	315	1850	15478	1.14209	1	0.916002	98.4945
GOTERM_MF_FAT	GO:0001883~purine nucleoside binding	43	9.59821	0.242669	RAD51B, GCLC, DNAH14, DNAH17, MYO7A, TDRD9, FPGT-TNNI3K, IARS2, DNAH2, DDR2, KIFC3, ACTR3, IGF1R, GPHN, DGKB, SYN2, TGM2, MKKS, RTEL1-TNFRSF6B, AGAP1, IPMK, SPATA5, INSR, AGAP3, CDK14, RTEL1, SIK3, KIF13B, RAP2B, RAP2A, NMNAT2, YARS, PDXK, TRIO, AK5, KIF16B, MAST1, NAV2, ATP2C1, DDX59, TNNI3K, ZRANB3, GBP3	315	1853	15478	1.14024	1	0.914688	98.5941
GOTERM_MF_FAT	GO:0032549~ribonucleoside binding	43	9.59821	0.242669	RAD51B, GCLC, DNAH14, DNAH17, MYO7A, TDRD9, FPGT-TNNI3K, IARS2, DNAH2, DDR2, KIFC3, ACTR3, IGF1R, GPHN, DGKB, SYN2, TGM2, MKKS, RTEL1-TNFRSF6B, AGAP1, IPMK, SPATA5, INSR, AGAP3, CDK14, RTEL1, SIK3, KIF13B, RAP2B, RAP2A, NMNAT2, YARS, PDXK, TRIO, AK5, KIF16B, MAST1, NAV2, ATP2C1, DDX59, TNNI3K, ZRANB3, GBP3	315	1853	15478	1.14024	1	0.914688	98.5941
GOTERM_MF_FAT	GO:0001882~nucleoside binding	43	9.59821	0.250661	RAD51B, GCLC, DNAH14, DNAH17, MYO7A, TDRD9, FPGT-TNNI3K, IARS2, DNAH2, DDR2, KIFC3, ACTR3, IGF1R, GPHN, DGKB, SYN2, TGM2, MKKS, RTEL1-TNFRSF6B, AGAP1, IPMK, SPATA5, INSR, AGAP3, CDK14, RTEL1, SIK3, KIF13B, RAP2B, RAP2A, NMNAT2, YARS, PDXK, TRIO, AK5, KIF16B, MAST1, NAV2, ATP2C1, DDX59, TNNI3K, ZRANB3, GBP3	315	1860	15478	1.13595	1	0.915665	98.8053
GOTERM_MF_FAT	GO:0000166~nucleotide binding	53	11.8304	0.311275	ACOX2, RAD51B, MYO7A, IARS2, DDR2, KIFC3, ACTR3, MKKS, AGAP1, RTEL1-TNFRSF6B, IPMK, INSR, AGAP3, CDK14, RTEL1, SIK3, KIF13B, RAP2B, NMNAT2, RAP2A, YARS, PDXK, AIFM1, PDE4D, KIF16B, TRNAU1AP, MAST1, NAV2, ATP2C1, TNNI3K, GBP3, RALYL, GCLC, DNAH14, DNAH17, TDRD9, FPGT-TNNI3K, DNAH2, IGF1R, GPHN, DGKB, PDE1A, SYN2, TGM2, SPATA5, RBM25, ETFA, TRIO, AK5, NDOR1, DDX59, PSPC1, ZRANB3	315	2389	15478	1.09009	1	0.931271	99.6725
GOTERM_MF_FAT	GO:1901265~nucleoside phosphate binding	53	11.8304	0.312419	ACOX2, RAD51B, MYO7A, IARS2, DDR2, KIFC3, ACTR3, MKKS, AGAP1, RTEL1-TNFRSF6B, IPMK, INSR, AGAP3, CDK14, RTEL1, SIK3, KIF13B, RAP2B, NMNAT2, RAP2A, YARS, PDXK, AIFM1, PDE4D, KIF16B, TRNAU1AP, MAST1, NAV2, ATP2C1, TNNI3K, GBP3, RALYL, GCLC, DNAH14, DNAH17, TDRD9, FPGT-TNNI3K, DNAH2, IGF1R, GPHN, DGKB, PDE1A, SYN2, TGM2, SPATA5, RBM25, ETFA, TRIO, AK5, NDOR1, DDX59, PSPC1, ZRANB3	315	2390	15478	1.08964	1	0.928775	99.6807
GOTERM_MF_FAT	GO:0017111~nucleoside-triphosphatase activity	19	4.24107	0.316224	ATF7IP, RAP2A, RAD51B, DNAH14, MYO7A, DNAH17, TDRD9, KIF16B, DNAH2, KIFC3, ATP2C1, NAV2, DDX59, TGM2, ZRANB3, RTEL1-TNFRSF6B, GBP3, RTEL1, KIF13B	315	779	15478	1.19845	1	0.926592	99.7068
GOTERM_MF_FAT	GO:0036094~small molecule binding	56	12.5	0.354576	ACOX2, RAD51B, MYO7A, IARS2, DDR2, KIFC3, ACTR3, MKKS, AGAP1, RTEL1-TNFRSF6B, IPMK, INSR, AGAP3, CDK14, RTEL1, SIK3, KIF13B, RAP2B, NMNAT2, RAP2A, YARS, PDXK, AIFM1, COLEC10, PDE4D, KIF16B, TRNAU1AP, MAST1, NAV2, ATP2C1, TNNI3K, GBP3, RALYL, GCLC, DNAH14, DNAH17, TDRD9, FPGT-TNNI3K, DNAH2, ASTN2, PLCL1, IGF1R, GPHN, DGKB, PDE1A, SYN2, TGM2, SPATA5, RBM25, ETFA, TRIO, AK5, NDOR1, DDX59, PSPC1, ZRA…	315	2571	15478	1.07026	1	0.935928	99.8791
GOTERM_MF_FAT	GO:0016462~pyrophosphatase activity	19	4.24107	0.408774	ATF7IP, RAP2A, RAD51B, DNAH14, MYO7A, DNAH17, TDRD9, KIF16B, DNAH2, KIFC3, ATP2C1, NAV2, DDX59, TGM2, ZRANB3, RTEL1-TNFRSF6B, GBP3, RTEL1, KIF13B	315	824	15478	1.133	1	0.951939	99.9685
GOTERM_MF_FAT	GO:0016818~hydrolase activity, acting on acid anhydrides, in phosphorus-containing anhydrides	19	4.24107	0.409947	ATF7IP, RAP2A, RAD51B, DNAH14, MYO7A, DNAH17, TDRD9, KIF16B, DNAH2, KIFC3, ATP2C1, NAV2, DDX59, TGM2, ZRANB3, RTEL1-TNFRSF6B, GBP3, RTEL1, KIF13B	315	826	15478	1.13026	1	0.951434	99.9695
GOTERM_MF_FAT	GO:0016817~hydrolase activity, acting on acid anhydrides	19	4.24107	0.418571	ATF7IP, RAP2A, RAD51B, DNAH14, MYO7A, DNAH17, TDRD9, KIF16B, DNAH2, KIFC3, ATP2C1, NAV2, DDX59, TGM2, ZRANB3, RTEL1-TNFRSF6B, GBP3, RTEL1, KIF13B	315	828	15478	1.12753	1	0.953353	99.9756
GOTERM_MF_FAT	GO:0042623~ATPase activity, coupled	7	1.5625	0.652008	RAD51B, ATP2C1, MYO7A, DDX59, TDRD9, RTEL1-TNFRSF6B, RTEL1	315	326	15478	1.05508	1	0.990172	100
Annotation Cluster 55	Enrichment Score: 0.6364665296210131
Category	Term	Count	%	PValue	Genes	List Total	Pop Hits	Pop Total	Fold Enrichment	Bonferroni	Benjamini	FDR
GOTERM_BP_FAT	GO:0042355~L-fucose catabolic process	3	0.669643	0.0157741	FUT8, FUT10, FUT1	330	10	16650	15.1364	1	0.683039	25.6517
GOTERM_BP_FAT	GO:0042354~L-fucose metabolic process	3	0.669643	0.0157741	FUT8, FUT10, FUT1	330	10	16650	15.1364	1	0.683039	25.6517
GOTERM_BP_FAT	GO:0019317~fucose catabolic process	3	0.669643	0.0157741	FUT8, FUT10, FUT1	330	10	16650	15.1364	1	0.683039	25.6517
GOTERM_MF_FAT	GO:0008417~fucosyltransferase activity	3	0.669643	0.0276101	FUT8, FUT10, FUT1	315	13	15478	11.3392	1	0.672326	34.9208
GOTERM_BP_FAT	GO:0006004~fucose metabolic process	3	0.669643	0.0435439	FUT8, FUT10, FUT1	330	17	16650	8.90374	1	0.794201	56.3932
GOTERM_BP_FAT	GO:0036065~fucosylation	3	0.669643	0.0808027	FUT8, FUT10, FUT1	330	24	16650	6.30682	1	0.857681	79.2098
GOTERM_BP_FAT	GO:0019320~hexose catabolic process	4	0.892857	0.0947993	FUT8, FUT10, ENO2, FUT1	330	55	16650	3.66942	1	0.871424	84.3819
GOTERM_BP_FAT	GO:0046365~monosaccharide catabolic process	4	0.892857	0.119605	FUT8, FUT10, ENO2, FUT1	330	61	16650	3.30849	1	0.897848	90.6961
GOTERM_MF_FAT	GO:0016758~transferase activity, transferring hexosyl groups	7	1.5625	0.244517	PIGM, FUT8, FUT10, GALNTL6, FUT1, UGGT2, EXT1	315	207	15478	1.66162	1	0.914205	98.6459
GOTERM_BP_FAT	GO:0044724~single-organism carbohydrate catabolic process	5	1.11607	0.277711	FUT8, FUT10, ENO2, FUT1, INSR	330	135	16650	1.86869	1	0.964033	99.7677
GOTERM_CC_FAT	GO:0031985~Golgi cisterna	4	0.892857	0.2877	FUT8, FUT10, FUT1, SGMS1	290	94	14527	2.13162	1	0.868848	99.2349
GOTERM_BP_FAT	GO:0016052~carbohydrate catabolic process	5	1.11607	0.358022	FUT8, FUT10, ENO2, FUT1, INSR	330	153	16650	1.64884	1	0.975902	99.9742
GOTERM_BP_FAT	GO:0009101~glycoprotein biosynthetic process	9	2.00893	0.401696	FUT8, FUT10, GALNTL6, HS6ST3, FUT1, UGGT2, PLCB1, EXT1, GLCE	330	354	16650	1.28274	1	0.981537	99.9931
GOTERM_CC_FAT	GO:0032580~Golgi cisterna membrane	3	0.669643	0.448313	FUT8, FUT10, FUT1	290	76	14527	1.97736	1	0.921088	99.9805
GOTERM_CC_FAT	GO:0005795~Golgi stack	4	0.892857	0.449366	FUT8, FUT10, FUT1, SGMS1	290	124	14527	1.61591	1	0.919991	99.981
GOTERM_BP_FAT	GO:0019318~hexose metabolic process	6	1.33929	0.480517	FUT8, FUT10, ENO2, FUT1, DLAT, INSR	330	231	16650	1.31051	1	0.987286	99.9995
GOTERM_BP_FAT	GO:0005996~monosaccharide metabolic process	6	1.33929	0.527605	FUT8, FUT10, ENO2, FUT1, DLAT, INSR	330	243	16650	1.24579	1	0.990392	99.9999
GOTERM_BP_FAT	GO:0006487~protein N-linked glycosylation	3	0.669643	0.527638	FUT8, FUT10, UGGT2	330	89	16650	1.70072	1	0.990329	99.9999
GOTERM_BP_FAT	GO:0009100~glycoprotein metabolic process	9	2.00893	0.535124	FUT8, FUT10, GALNTL6, HS6ST3, FUT1, UGGT2, PLCB1, EXT1, GLCE	330	399	16650	1.13807	1	0.990732	99.9999
GOTERM_MF_FAT	GO:0016757~transferase activity, transferring glycosyl groups	7	1.5625	0.536306	PIGM, FUT8, FUT10, GALNTL6, FUT1, UGGT2, EXT1	315	289	15478	1.19016	1	0.976665	99.9992
GOTERM_BP_FAT	GO:0005975~carbohydrate metabolic process	16	3.57143	0.576675	FUT8, FUT10, NFKB1, DLAT, PTEN, GALNTL6, SLC2A1, ENO2, UBC, FUT1, GLB1L3, EXT1, UGGT2, INSR, SIK3, GBA	330	778	16650	1.03763	1	0.993029	100
GOTERM_BP_FAT	GO:0006486~protein glycosylation	6	1.33929	0.648823	FUT8, FUT10, GALNTL6, FUT1, UGGT2, EXT1	330	279	16650	1.08504	1	0.996019	100
GOTERM_BP_FAT	GO:0043413~macromolecule glycosylation	6	1.33929	0.648823	FUT8, FUT10, GALNTL6, FUT1, UGGT2, EXT1	330	279	16650	1.08504	1	0.996019	100
GOTERM_BP_FAT	GO:0044723~single-organism carbohydrate metabolic process	13	2.90179	0.649045	FUT8, FUT10, GALNTL6, SLC2A1, ENO2, UBC, NFKB1, FUT1, DLAT, UGGT2, EXT1, PTEN, INSR	330	656	16650	0.999861	1	0.996004	100
GOTERM_BP_FAT	GO:0070085~glycosylation	6	1.33929	0.679034	FUT8, FUT10, GALNTL6, FUT1, UGGT2, EXT1	330	289	16650	1.0475	1	0.996908	100
GOTERM_MF_FAT	GO:0008194~UDP-glycosyltransferase activity	3	0.669643	0.793276	GALNTL6, UGGT2, EXT1	315	144	15478	1.02368	1	0.997478	100
GOTERM_BP_FAT	GO:1901137~carbohydrate derivative biosynthetic process	13	2.90179	0.819903	GPC4, PIGM, FUT8, FUT10, GALNTL6, HS6ST3, NFKB1, FUT1, AK5, UGGT2, PLCB1, EXT1, GLCE	330	756	16650	0.867605	1	0.999394	100
Annotation Cluster 56	Enrichment Score: 0.6355648668469095
Category	Term	Count	%	PValue	Genes	List Total	Pop Hits	Pop Total	Fold Enrichment	Bonferroni	Benjamini	FDR
GOTERM_BP_FAT	GO:0007034~vacuolar transport	10	2.23214	0.120277	EPS15, STX6, DPY30, LEPROTL1, NEDD4, SNX16, UBC, DENND2A, KIF16B, AP3B1	330	289	16650	1.74583	1	0.896213	90.8275
GOTERM_BP_FAT	GO:0016482~cytosolic transport	6	1.33929	0.153668	EPS15, STX6, SNX16, DENND2A, SYT7, KIF16B	330	143	16650	2.11697	1	0.924495	95.5413
GOTERM_BP_FAT	GO:0016197~endosomal transport	8	1.78571	0.226875	EPS15, STX6, DPY30, LEPROTL1, SNX16, UBC, DENND2A, KIF16B	330	250	16650	1.61455	1	0.952017	99.1745
GOTERM_CC_FAT	GO:0031901~early endosome membrane	3	0.669643	0.684211	EPS15, SNX16, KIF16B	290	118	14527	1.27355	1	0.975255	100
Annotation Cluster 57	Enrichment Score: 0.6347414890205546
Category	Term	Count	%	PValue	Genes	List Total	Pop Hits	Pop Total	Fold Enrichment	Bonferroni	Benjamini	FDR
GOTERM_BP_FAT	GO:0050773~regulation of dendrite development	6	1.33929	0.0995007	RAP2A, DAB2IP, SRCIN1, NEDD4, NFATC4, PTEN	330	124	16650	2.44135	1	0.870743	85.8267
GOTERM_BP_FAT	GO:0014065~phosphatidylinositol 3-kinase signaling	5	1.11607	0.13617	IGF1R, DAB2IP, NEDD4, UBE3A, PTEN	330	100	16650	2.52273	1	0.909476	93.4705
GOTERM_BP_FAT	GO:0048015~phosphatidylinositol-mediated signaling	6	1.33929	0.297699	IGF1R, DAB2IP, NEDD4, UBE3A, PLCH1, PTEN	330	184	16650	1.64526	1	0.968234	99.8623
GOTERM_BP_FAT	GO:0048017~inositol lipid-mediated signaling	6	1.33929	0.310827	IGF1R, DAB2IP, NEDD4, UBE3A, PLCH1, PTEN	330	187	16650	1.61886	1	0.968856	99.9032
GOTERM_BP_FAT	GO:0014066~regulation of phosphatidylinositol 3-kinase signaling	4	0.892857	0.534673	DAB2IP, NEDD4, UBE3A, PTEN	330	142	16650	1.42125	1	0.990805	99.9999
Annotation Cluster 58	Enrichment Score: 0.6319039837291607
Category	Term	Count	%	PValue	Genes	List Total	Pop Hits	Pop Total	Fold Enrichment	Bonferroni	Benjamini	FDR
GOTERM_BP_FAT	GO:1903052~positive regulation of proteolysis involved in cellular protein catabolic process	9	2.00893	0.0205232	HSPBP1, RNF114, DAB2IP, GCLC, ANAPC4, PSMD1, UBC, PTEN, GBA	330	171	16650	2.6555	1	0.720526	32.0623
GOTERM_BP_FAT	GO:1903362~regulation of cellular protein catabolic process	11	2.45536	0.0279699	HSPBP1, RNF114, DAB2IP, GCLC, UBE3A, ANAPC4, PSMD1, UBC, PTEN, ANXA2, GBA	330	251	16650	2.21116	1	0.751192	41.0719
GOTERM_BP_FAT	GO:1903364~positive regulation of cellular protein catabolic process	9	2.00893	0.0317844	HSPBP1, RNF114, DAB2IP, GCLC, ANAPC4, PSMD1, UBC, PTEN, GBA	330	186	16650	2.44135	1	0.771972	45.2369
GOTERM_BP_FAT	GO:0031329~regulation of cellular catabolic process	14	3.125	0.0373327	DAB2IP, GCLC, AIFM1, UBE3A, ANAPC4, FGF21, PTEN, ANXA2, HSPBP1, RNF114, PSMD1, UBC, INSR, GBA	330	377	16650	1.87364	1	0.784855	50.8005
GOTERM_BP_FAT	GO:1903050~regulation of proteolysis involved in cellular protein catabolic process	10	2.23214	0.039606	HSPBP1, RNF114, DAB2IP, GCLC, UBE3A, ANAPC4, PSMD1, UBC, PTEN, GBA	330	230	16650	2.19368	1	0.792024	52.9219
GOTERM_BP_FAT	GO:0031331~positive regulation of cellular catabolic process	11	2.45536	0.0444244	HSPBP1, RNF114, DAB2IP, GCLC, ANAPC4, PSMD1, UBC, FGF21, PTEN, INSR, GBA	330	272	16650	2.04044	1	0.795301	57.1356
GOTERM_BP_FAT	GO:0009896~positive regulation of catabolic process	12	2.67857	0.0668792	HSPBP1, RNF114, DAB2IP, GCLC, NEDD4, ANAPC4, PSMD1, UBC, FGF21, PTEN, INSR, GBA	330	333	16650	1.81818	1	0.850551	72.4846
GOTERM_BP_FAT	GO:0045732~positive regulation of protein catabolic process	10	2.23214	0.0697556	HSPBP1, RNF114, DAB2IP, GCLC, NEDD4, ANAPC4, PSMD1, UBC, PTEN, GBA	330	257	16650	1.96321	1	0.848177	74.0235
GOTERM_BP_FAT	GO:0044248~cellular catabolic process	41	9.15179	0.0805411	ACOX2, GCLC, USP3, UBE3A, CPQ, PTEN, ZNRF3, SLC25A21, LNPEP, WWP1, PPP2CB, PDE1A, PSMD1, RPL8, OTUD7B, MGLL, RPL5, PDE8A, ZCCHC6, USP15, INSR, GBA, ETFA, DAB2IP, CYP1A1, AIFM1, ANAPC4, RPL26, IDO2, PDE4D, FGF21, KIF16B, CAPN2, ANXA2, HSPBP1, RNF114, NEDD4, FAAH, UBC, LIPC, UGGT2	330	1616	16650	1.2801	1	0.858305	79.0992
GOTERM_BP_FAT	GO:0044257~cellular protein catabolic process	20	4.46429	0.0905098	DAB2IP, GCLC, USP3, UBE3A, ANAPC4, CAPN2, PTEN, ZNRF3, ANXA2, HSPBP1, RNF114, NEDD4, WWP1, PPP2CB, PSMD1, UBC, OTUD7B, UGGT2, USP15, GBA	330	689	16650	1.46457	1	0.872125	82.9429
GOTERM_BP_FAT	GO:0051603~proteolysis involved in cellular protein catabolic process	19	4.24107	0.102148	DAB2IP, GCLC, USP3, UBE3A, ANAPC4, CAPN2, PTEN, ZNRF3, HSPBP1, RNF114, NEDD4, WWP1, PPP2CB, PSMD1, UBC, OTUD7B, UGGT2, USP15, GBA	330	657	16650	1.45911	1	0.874311	86.5837
GOTERM_BP_FAT	GO:0006511~ubiquitin-dependent protein catabolic process	17	3.79464	0.108542	DAB2IP, GCLC, USP3, UBE3A, ANAPC4, PTEN, ZNRF3, HSPBP1, RNF114, NEDD4, WWP1, PPP2CB, PSMD1, UBC, OTUD7B, UGGT2, USP15	330	577	16650	1.48653	1	0.885928	88.2573
GOTERM_BP_FAT	GO:0042176~regulation of protein catabolic process	12	2.67857	0.117125	HSPBP1, RNF114, DAB2IP, GCLC, NEDD4, UBE3A, ANAPC4, PSMD1, UBC, PTEN, ANXA2, GBA	330	370	16650	1.63636	1	0.896728	90.195
GOTERM_BP_FAT	GO:0019941~modification-dependent protein catabolic process	17	3.79464	0.120232	DAB2IP, GCLC, USP3, UBE3A, ANAPC4, PTEN, ZNRF3, HSPBP1, RNF114, NEDD4, WWP1, PPP2CB, PSMD1, UBC, OTUD7B, UGGT2, USP15	330	585	16650	1.4662	1	0.897129	90.8188
GOTERM_BP_FAT	GO:0043632~modification-dependent macromolecule catabolic process	17	3.79464	0.131341	DAB2IP, GCLC, USP3, UBE3A, ANAPC4, PTEN, ZNRF3, HSPBP1, RNF114, NEDD4, WWP1, PPP2CB, PSMD1, UBC, OTUD7B, UGGT2, USP15	330	593	16650	1.44642	1	0.90807	92.7554
GOTERM_BP_FAT	GO:0009894~regulation of catabolic process	15	3.34821	0.133804	DAB2IP, GCLC, AIFM1, UBE3A, ANAPC4, FGF21, PTEN, ANXA2, HSPBP1, RNF114, NEDD4, PSMD1, UBC, INSR, GBA	330	509	16650	1.48687	1	0.909749	93.1288
GOTERM_BP_FAT	GO:2000058~regulation of protein ubiquitination involved in ubiquitin-dependent protein catabolic process	5	1.11607	0.139726	UBE3A, ANAPC4, PSMD1, UBC, PTEN	330	101	16650	2.49775	1	0.91122	93.9538
GOTERM_BP_FAT	GO:0044265~cellular macromolecule catabolic process	25	5.58036	0.158697	DAB2IP, GCLC, USP3, AIFM1, UBE3A, ANAPC4, RPL26, CAPN2, PTEN, ZNRF3, ANXA2, HSPBP1, RNF114, NEDD4, WWP1, PPP2CB, PSMD1, RPL8, OTUD7B, UBC, RPL5, UGGT2, ZCCHC6, USP15, GBA	330	976	16650	1.29238	1	0.927667	96.0102
GOTERM_BP_FAT	GO:0032434~regulation of proteasomal ubiquitin-dependent protein catabolic process	5	1.11607	0.18112	HSPBP1, RNF114, DAB2IP, GCLC, GBA	330	112	16650	2.25244	1	0.939159	97.5888
GOTERM_BP_FAT	GO:0030163~protein catabolic process	21	4.6875	0.182002	DAB2IP, GCLC, USP3, UBE3A, ANAPC4, CAPN2, PTEN, ZNRF3, ANXA2, HSPBP1, LNPEP, RNF114, NEDD4, WWP1, PPP2CB, PSMD1, UBC, OTUD7B, UGGT2, USP15, GBA	330	811	16650	1.30647	1	0.93892	97.6367
GOTERM_BP_FAT	GO:1904668~positive regulation of ubiquitin protein ligase activity	4	0.892857	0.220642	ANAPC4, PSMD1, UBC, PTEN	330	82	16650	2.4612	1	0.949894	99.0412
GOTERM_BP_FAT	GO:1904666~regulation of ubiquitin protein ligase activity	4	0.892857	0.241575	ANAPC4, PSMD1, UBC, PTEN	330	86	16650	2.34672	1	0.955483	99.4228
GOTERM_BP_FAT	GO:1901800~positive regulation of proteasomal protein catabolic process	4	0.892857	0.246859	HSPBP1, RNF114, DAB2IP, GCLC	330	87	16650	2.31975	1	0.956679	99.4934
GOTERM_BP_FAT	GO:0009057~macromolecule catabolic process	28	6.25	0.267584	GCLC, USP3, UBE3A, PTEN, ZNRF3, LNPEP, GPC4, WWP1, PPP2CB, PSMD1, RPL8, OTUD7B, RPL5, USP15, ZCCHC6, GBA, DAB2IP, AIFM1, ANAPC4, RPL26, KIF16B, CAPN2, ANXA2, HSPBP1, RNF114, NEDD4, UBC, UGGT2	330	1201	16650	1.17629	1	0.962076	99.6988
GOTERM_BP_FAT	GO:2000060~positive regulation of protein ubiquitination involved in ubiquitin-dependent protein catabolic process	4	0.892857	0.268164	ANAPC4, PSMD1, UBC, PTEN	330	91	16650	2.21778	1	0.961758	99.7033
GOTERM_BP_FAT	GO:0045862~positive regulation of proteolysis	10	2.23214	0.273468	HSPBP1, RNF114, DAB2IP, GCLC, AIFM1, ANAPC4, PSMD1, UBC, PTEN, GBA	330	358	16650	1.40934	1	0.963349	99.7409
GOTERM_BP_FAT	GO:0010498~proteasomal protein catabolic process	11	2.45536	0.276631	HSPBP1, RNF114, DAB2IP, GCLC, WWP1, PPP2CB, ANAPC4, PSMD1, UBC, UGGT2, GBA	330	403	16650	1.37717	1	0.963779	99.7611
GOTERM_BP_FAT	GO:0031398~positive regulation of protein ubiquitination	6	1.33929	0.292142	HSPBP1, UBE3A, ANAPC4, PSMD1, UBC, PTEN	330	182	16650	1.66334	1	0.966783	99.8405
GOTERM_BP_FAT	GO:0043161~proteasome-mediated ubiquitin-dependent protein catabolic process	10	2.23214	0.323595	HSPBP1, RNF114, DAB2IP, GCLC, WWP1, PPP2CB, ANAPC4, PSMD1, UBC, UGGT2	330	375	16650	1.34545	1	0.969827	99.9317
GOTERM_BP_FAT	GO:0061136~regulation of proteasomal protein catabolic process	5	1.11607	0.331086	HSPBP1, RNF114, DAB2IP, GCLC, GBA	330	147	16650	1.71614	1	0.971177	99.9445
GOTERM_BP_FAT	GO:0051443~positive regulation of ubiquitin-protein transferase activity	4	0.892857	0.332964	ANAPC4, PSMD1, UBC, PTEN	330	103	16650	1.9594	1	0.971667	99.9473
GOTERM_BP_FAT	GO:1903322~positive regulation of protein modification by small protein conjugation or removal	6	1.33929	0.353895	HSPBP1, UBE3A, ANAPC4, PSMD1, UBC, PTEN	330	198	16650	1.52893	1	0.975325	99.9709
GOTERM_BP_FAT	GO:0000209~protein polyubiquitination	7	1.5625	0.380545	LNPEP, RNF114, NEDD4, UBE3A, ANAPC4, PSMD1, UBC	330	252	16650	1.40152	1	0.980194	99.9867
GOTERM_BP_FAT	GO:0031396~regulation of protein ubiquitination	7	1.5625	0.388814	HSPBP1, GCLC, UBE3A, ANAPC4, PSMD1, UBC, PTEN	330	253	16650	1.39598	1	0.980955	99.9897
GOTERM_BP_FAT	GO:0051436~negative regulation of ubiquitin-protein ligase activity involved in mitotic cell cycle	3	0.669643	0.410853	ANAPC4, PSMD1, UBC	330	71	16650	2.13188	1	0.982721	99.9948
GOTERM_BP_FAT	GO:0051439~regulation of ubiquitin-protein ligase activity involved in mitotic cell cycle	3	0.669643	0.417726	ANAPC4, PSMD1, UBC	330	72	16650	2.10227	1	0.983091	99.9958
GOTERM_BP_FAT	GO:0051438~regulation of ubiquitin-protein transferase activity	4	0.892857	0.418783	ANAPC4, PSMD1, UBC, PTEN	330	119	16650	1.69595	1	0.98307	99.996
GOTERM_BP_FAT	GO:1901990~regulation of mitotic cell cycle phase transition	8	1.78571	0.419131	RAD51B, CYP1A1, ANAPC4, PSMD1, UBC, PLCB1, PTEN, RPTOR	330	312	16650	1.29371	1	0.98302	99.996
GOTERM_BP_FAT	GO:1904667~negative regulation of ubiquitin protein ligase activity	3	0.669643	0.424559	ANAPC4, PSMD1, UBC	330	73	16650	2.07347	1	0.983571	99.9966
GOTERM_BP_FAT	GO:0032436~positive regulation of proteasomal ubiquitin-dependent protein catabolic process	3	0.669643	0.424559	HSPBP1, RNF114, GCLC	330	73	16650	2.07347	1	0.983571	99.9966
GOTERM_BP_FAT	GO:0051437~positive regulation of ubiquitin-protein ligase activity involved in regulation of mitotic cell cycle transition	3	0.669643	0.444804	ANAPC4, PSMD1, UBC	330	76	16650	1.99163	1	0.985447	99.9983
GOTERM_BP_FAT	GO:0042787~protein ubiquitination involved in ubiquitin-dependent protein catabolic process	6	1.33929	0.447867	NEDD4, WWP1, ANAPC4, PSMD1, UBC, PTEN	330	222	16650	1.36364	1	0.985594	99.9984
GOTERM_BP_FAT	GO:1903320~regulation of protein modification by small protein conjugation or removal	7	1.5625	0.464462	HSPBP1, GCLC, UBE3A, ANAPC4, PSMD1, UBC, PTEN	330	276	16650	1.27964	1	0.986645	99.9991
GOTERM_BP_FAT	GO:0031145~anaphase-promoting complex-dependent catabolic process	3	0.669643	0.464647	ANAPC4, PSMD1, UBC	330	79	16650	1.916	1	0.986483	99.9991
GOTERM_BP_FAT	GO:0031397~negative regulation of protein ubiquitination	4	0.892857	0.470614	GCLC, ANAPC4, PSMD1, UBC	330	129	16650	1.56448	1	0.986742	99.9993
GOTERM_BP_FAT	GO:0051444~negative regulation of ubiquitin-protein transferase activity	3	0.669643	0.471168	ANAPC4, PSMD1, UBC	330	80	16650	1.89205	1	0.986742	99.9993
GOTERM_BP_FAT	GO:1901987~regulation of cell cycle phase transition	8	1.78571	0.496665	RAD51B, CYP1A1, ANAPC4, PSMD1, UBC, PLCB1, PTEN, RPTOR	330	336	16650	1.2013	1	0.988439	99.9997
GOTERM_BP_FAT	GO:1903321~negative regulation of protein modification by small protein conjugation or removal	4	0.892857	0.525098	GCLC, ANAPC4, PSMD1, UBC	330	140	16650	1.44156	1	0.990209	99.9999
GOTERM_BP_FAT	GO:0044772~mitotic cell cycle phase transition	11	2.45536	0.565135	TAF2, RAD51B, CYP1A1, E2F6, ANAPC4, PSMD1, UBC, PLCB1, PTEN, CDK14, RPTOR	330	514	16650	1.07977	1	0.992501	100
GOTERM_BP_FAT	GO:0044770~cell cycle phase transition	11	2.45536	0.64378	TAF2, RAD51B, CYP1A1, E2F6, ANAPC4, PSMD1, UBC, PLCB1, PTEN, CDK14, RPTOR	330	547	16650	1.01463	1	0.995856	100
GOTERM_BP_FAT	GO:0016567~protein ubiquitination	15	3.34821	0.663976	GCLC, UBE3A, ANAPC4, PTEN, ZNRF3, MYCBP2, HSPBP1, LNPEP, RNF114, RNF208, NEDD4, WWP1, PSMD1, UBC, KLHL13	330	770	16650	0.982881	1	0.996484	100
GOTERM_BP_FAT	GO:0010564~regulation of cell cycle process	11	2.45536	0.742935	RAD51B, DAB2IP, CYP1A1, EPGN, ANAPC4, PSMD1, UBC, PLCB1, PTEN, INSR, RPTOR	330	595	16650	0.932773	1	0.998293	100
GOTERM_BP_FAT	GO:0070647~protein modification by small protein conjugation or removal	18	4.01786	0.814179	GCLC, USP3, UBE3A, ANAPC4, PTEN, ZNRF3, MYCBP2, HSPBP1, LNPEP, RNF114, RNF208, NEDD4, WWP1, PSMD1, UBC, KLHL13, OTUD7B, USP15	330	1032	16650	0.880021	1	0.999343	100
GOTERM_BP_FAT	GO:0032446~protein modification by small protein conjugation	15	3.34821	0.841401	GCLC, UBE3A, ANAPC4, PTEN, ZNRF3, MYCBP2, HSPBP1, LNPEP, RNF114, RNF208, NEDD4, WWP1, PSMD1, UBC, KLHL13	330	887	16650	0.853234	1	0.999598	100
GOTERM_BP_FAT	GO:0006508~proteolysis	29	6.47321	0.86498	GCLC, USP3, UBE3A, CPQ, NFKB1, PTEN, ZNRF3, LNPEP, IMMP2L, WWP1, PPP2CB, PSMD1, OTUD7B, DPP8, USP15, GBA, TAF2, DAB2IP, AIFM1, ANAPC4, COLEC10, CAPN2, HSPBP1, RNF114, NEDD4, UBC, PAPPA2, ADAMTS3, UGGT2	330	1693	16650	0.864254	1	0.999753	100
GOTERM_BP_FAT	GO:0030162~regulation of proteolysis	11	2.45536	0.897529	HSPBP1, RNF114, DAB2IP, GCLC, UBE3A, AIFM1, ANAPC4, PSMD1, UBC, PTEN, GBA	330	708	16650	0.783898	1	0.999885	100
Annotation Cluster 59	Enrichment Score: 0.6296219344550645
Category	Term	Count	%	PValue	Genes	List Total	Pop Hits	Pop Total	Fold Enrichment	Bonferroni	Benjamini	FDR
GOTERM_BP_FAT	GO:0015758~glucose transport	5	1.11607	0.201145	SLC2A13, SLC2A1, PLS1, FGF21, INSR	330	117	16650	2.15618	1	0.944464	98.4802
GOTERM_BP_FAT	GO:0008643~carbohydrate transport	6	1.33929	0.206839	SLC2A13, SLC45A4, SLC2A1, PLS1, FGF21, INSR	330	159	16650	1.90395	1	0.94697	98.6699
GOTERM_BP_FAT	GO:0015749~monosaccharide transport	5	1.11607	0.209335	SLC2A13, SLC2A1, PLS1, FGF21, INSR	330	119	16650	2.11994	1	0.947169	98.7458
GOTERM_BP_FAT	GO:0008645~hexose transport	5	1.11607	0.209335	SLC2A13, SLC2A1, PLS1, FGF21, INSR	330	119	16650	2.11994	1	0.947169	98.7458
GOTERM_BP_FAT	GO:0046323~glucose import	3	0.669643	0.389999	SLC2A13, FGF21, INSR	330	68	16650	2.22594	1	0.980663	99.99
Annotation Cluster 60	Enrichment Score: 0.6246895800746529
Category	Term	Count	%	PValue	Genes	List Total	Pop Hits	Pop Total	Fold Enrichment	Bonferroni	Benjamini	FDR
GOTERM_MF_FAT	GO:0000980~RNA polymerase II distal enhancer sequence-specific DNA binding	4	0.892857	0.145215	ARX, SMARCD2, NFKB1, NR5A2	315	65	15478	3.02379	1	0.930102	90.9943
GOTERM_MF_FAT	GO:0001158~enhancer sequence-specific DNA binding	4	0.892857	0.2374	ARX, SMARCD2, NFKB1, NR5A2	315	83	15478	2.36802	1	0.916491	98.4363
GOTERM_MF_FAT	GO:0003705~transcription factor activity, RNA polymerase II distal enhancer sequence-specific binding	4	0.892857	0.297796	ARX, NFKB1, NR5A2, GLI1	315	94	15478	2.09092	1	0.933415	99.5591
GOTERM_MF_FAT	GO:0035326~enhancer binding	4	0.892857	0.308908	ARX, SMARCD2, NFKB1, NR5A2	315	96	15478	2.04735	1	0.932904	99.6548
Annotation Cluster 61	Enrichment Score: 0.5994966365303004
Category	Term	Count	%	PValue	Genes	List Total	Pop Hits	Pop Total	Fold Enrichment	Bonferroni	Benjamini	FDR
GOTERM_BP_FAT	GO:0014855~striated muscle cell proliferation	4	0.892857	0.0832899	ZFPM2, PAXBP1, RBPJ, PTEN	330	52	16650	3.88112	1	0.863308	80.2339
GOTERM_BP_FAT	GO:0061061~muscle structure development	17	3.79464	0.124237	LMNA, ARID1A, PAXBP1, CAPN2, PTEN, CTNNA2, FOXP2, TSC22D3, XIRP2, KRT8, FER1L5, NFATC4, ZFPM2, RBPJ, PLCB1, KDM6B, BCL9	330	589	16650	1.45624	1	0.9003	91.5674
GOTERM_BP_FAT	GO:0035265~organ growth	6	1.33929	0.138373	ARX, UBE3A, ZFPM2, RBPJ, DDR2, PTEN	330	138	16650	2.19368	1	0.910648	93.774
GOTERM_BP_FAT	GO:0060043~regulation of cardiac muscle cell proliferation	3	0.669643	0.151679	ZFPM2, RBPJ, PTEN	330	35	16650	4.32468	1	0.923198	95.342
GOTERM_BP_FAT	GO:0048738~cardiac muscle tissue development	7	1.5625	0.163497	XIRP2, LMNA, ARID1A, ZFPM2, RBPJ, PTEN, KDM6B	330	186	16650	1.89883	1	0.931023	96.4139
GOTERM_BP_FAT	GO:0042692~muscle cell differentiation	11	2.45536	0.180897	KRT8, FER1L5, LMNA, NFATC4, ARID1A, CAPN2, RBPJ, PLCB1, KDM6B, CTNNA2, BCL9	330	362	16650	1.53315	1	0.940085	97.5765
GOTERM_BP_FAT	GO:0033002~muscle cell proliferation	6	1.33929	0.193	NOTCH3, TGM2, ZFPM2, PAXBP1, RBPJ, PTEN	330	155	16650	1.95308	1	0.942108	98.1638
GOTERM_BP_FAT	GO:0060038~cardiac muscle cell proliferation	3	0.669643	0.194066	ZFPM2, RBPJ, PTEN	330	41	16650	3.6918	1	0.941	98.2085
GOTERM_BP_FAT	GO:0046620~regulation of organ growth	4	0.892857	0.225842	ARX, ZFPM2, RBPJ, PTEN	330	83	16650	2.43154	1	0.951676	99.1537
GOTERM_BP_FAT	GO:0051146~striated muscle cell differentiation	8	1.78571	0.226875	KRT8, FER1L5, LMNA, ARID1A, CAPN2, RBPJ, KDM6B, BCL9	330	250	16650	1.61455	1	0.952017	99.1745
GOTERM_BP_FAT	GO:0055021~regulation of cardiac muscle tissue growth	3	0.669643	0.230389	ZFPM2, RBPJ, PTEN	330	46	16650	3.29051	1	0.952499	99.2417
GOTERM_BP_FAT	GO:0014706~striated muscle tissue development	10	2.23214	0.260816	TSC22D3, XIRP2, LMNA, ARID1A, ZFPM2, RBPJ, PTEN, KDM6B, BCL9, FOXP2	330	350	16650	1.44156	1	0.960238	99.6425
GOTERM_BP_FAT	GO:0060420~regulation of heart growth	3	0.669643	0.274453	ZFPM2, RBPJ, PTEN	330	52	16650	2.91084	1	0.963255	99.7474
GOTERM_BP_FAT	GO:0055007~cardiac muscle cell differentiation	4	0.892857	0.300471	LMNA, ARID1A, RBPJ, KDM6B	330	97	16650	2.0806	1	0.968163	99.8721
GOTERM_BP_FAT	GO:0060537~muscle tissue development	10	2.23214	0.302417	TSC22D3, XIRP2, LMNA, ARID1A, ZFPM2, RBPJ, PTEN, KDM6B, BCL9, FOXP2	330	367	16650	1.37478	1	0.968501	99.8786
GOTERM_BP_FAT	GO:0007507~heart development	13	2.90179	0.309066	ERG, NEDD4, XIRP2, LMNA, MKKS, NFATC4, ARID1A, ZFPM2, C5ORF42, RBPJ, PTEN, INSR, KDM6B	330	511	16650	1.28358	1	0.968602	99.8984
GOTERM_BP_FAT	GO:0055024~regulation of cardiac muscle tissue development	3	0.669643	0.347368	ZFPM2, RBPJ, PTEN	330	62	16650	2.44135	1	0.973728	99.9649
GOTERM_BP_FAT	GO:0055017~cardiac muscle tissue growth	3	0.669643	0.382975	ZFPM2, RBPJ, PTEN	330	67	16650	2.25916	1	0.980366	99.9877
GOTERM_BP_FAT	GO:0016202~regulation of striated muscle tissue development	4	0.892857	0.402898	TSC22D3, ZFPM2, RBPJ, PTEN	330	116	16650	1.73981	1	0.981547	99.9933
GOTERM_BP_FAT	GO:0048634~regulation of muscle organ development	4	0.892857	0.413503	TSC22D3, ZFPM2, RBPJ, PTEN	330	118	16650	1.71032	1	0.982795	99.9952
GOTERM_BP_FAT	GO:0060419~heart growth	3	0.669643	0.417726	ZFPM2, RBPJ, PTEN	330	72	16650	2.10227	1	0.983091	99.9958
GOTERM_BP_FAT	GO:1901861~regulation of muscle tissue development	4	0.892857	0.418783	TSC22D3, ZFPM2, RBPJ, PTEN	330	119	16650	1.69595	1	0.98307	99.996
GOTERM_BP_FAT	GO:0007517~muscle organ development	9	2.00893	0.425564	TSC22D3, XIRP2, LMNA, ZFPM2, PAXBP1, RBPJ, PTEN, BCL9, FOXP2	330	366	16650	1.24069	1	0.983541	99.9968
GOTERM_BP_FAT	GO:0035051~cardiocyte differentiation	4	0.892857	0.434527	LMNA, ARID1A, RBPJ, KDM6B	330	122	16650	1.65425	1	0.984561	99.9976
Annotation Cluster 62	Enrichment Score: 0.5846951329482278
Category	Term	Count	%	PValue	Genes	List Total	Pop Hits	Pop Total	Fold Enrichment	Bonferroni	Benjamini	FDR
GOTERM_BP_FAT	GO:0046486~glycerolipid metabolic process	11	2.45536	0.21809	DGKB, PITPNM3, PIGM, PLA2G6, MGLL, INPP4B, FGF21, PLCB1, LIPC, PTEN, BPNT1	330	379	16650	1.46438	1	0.948782	98.9809
GOTERM_BP_FAT	GO:0006629~lipid metabolic process	31	6.91964	0.249732	ACOX2, NFKB1, SGMS1, PTEN, GPC4, PLCL1, PIGM, DGKB, PLCH1, MGLL, PLCB1, BPNT1, WWOX, GBA, ETFA, DAB2IP, CYP1A1, FA2H, FADS2, FGF21, DLAT, PITPNM3, FAAH, PLA2G6, PPM1L, INPP4B, CYP2R1, KDSR, NR5A2, LIPC, PLCXD2	330	1330	16650	1.17601	1	0.957761	99.5282
GOTERM_BP_FAT	GO:0044255~cellular lipid metabolic process	24	5.35714	0.323448	ACOX2, DAB2IP, CYP1A1, FA2H, FADS2, FGF21, SGMS1, DLAT, PTEN, GPC4, DGKB, PIGM, PITPNM3, FAAH, MGLL, PLA2G6, INPP4B, PPM1L, KDSR, PLCB1, LIPC, BPNT1, GBA, ETFA	330	1043	16650	1.16099	1	0.969998	99.9314
Annotation Cluster 63	Enrichment Score: 0.5702576024030597
Category	Term	Count	%	PValue	Genes	List Total	Pop Hits	Pop Total	Fold Enrichment	Bonferroni	Benjamini	FDR
GOTERM_BP_FAT	GO:0009790~embryo development	28	6.25	0.0387328	RAD51B, SHROOM3, FUT8, MYO7A, C5ORF42, CITED1, GLI1, KRT8, MKKS, SEMA3A, FBN2, PLCB1, IPMK, EMX1, CYP1A1, FUT10, PTPRR, ARID1A, FZD3, KIF16B, CAPN2, ZFPM2, CENPU, RBPJ, EXT1, NR5A2, PHLDB2, KDM6B	330	954	16650	1.48085	1	0.790816	52.1176
GOTERM_BP_FAT	GO:0048568~embryonic organ development	10	2.23214	0.442253	MYO7A, KRT8, MKKS, ARID1A, FZD3, ZFPM2, FBN2, RBPJ, CITED1, GLI1	330	417	16650	1.20994	1	0.985505	99.9981
GOTERM_BP_FAT	GO:0048598~embryonic morphogenesis	13	2.90179	0.456083	SHROOM3, MYO7A, FZD3, ARID1A, KIF16B, C5ORF42, GLI1, MKKS, FBN2, EXT1, PHLDB2, IPMK, KDM6B	330	571	16650	1.1487	1	0.986263	99.9988
GOTERM_BP_FAT	GO:0048562~embryonic organ morphogenesis	6	1.33929	0.670155	MYO7A, MKKS, ARID1A, FZD3, FBN2, GLI1	330	286	16650	1.05849	1	0.996642	100
Annotation Cluster 64	Enrichment Score: 0.5609360760374575
Category	Term	Count	%	PValue	Genes	List Total	Pop Hits	Pop Total	Fold Enrichment	Bonferroni	Benjamini	FDR
GOTERM_BP_FAT	GO:0016055~Wnt signaling pathway	20	4.46429	0.00252272	DIXDC1, DAB2IP, TLE3, NFKB1, FZD3, LGR5, PTEN, CITED1, ZNRF3, GLI1, GPC4, PSMD1, UBC, NFATC4, MCC, RBPJ, PLCB1, CDK14, WWOX, BCL9	330	468	16650	2.15618	0.99997	0.457741	4.5997
GOTERM_BP_FAT	GO:0198738~cell-cell signaling by wnt	20	4.46429	0.00258447	DIXDC1, DAB2IP, TLE3, NFKB1, FZD3, LGR5, PTEN, CITED1, ZNRF3, GLI1, GPC4, PSMD1, UBC, NFATC4, MCC, RBPJ, PLCB1, CDK14, WWOX, BCL9	330	469	16650	2.15158	0.999977	0.44688	4.70975
GOTERM_BP_FAT	GO:1905114~cell surface receptor signaling pathway involved in cell-cell signaling	20	4.46429	0.00879275	DIXDC1, DAB2IP, TLE3, NFKB1, FZD3, LGR5, PTEN, CITED1, ZNRF3, GLI1, GPC4, PSMD1, UBC, NFATC4, MCC, RBPJ, PLCB1, CDK14, WWOX, BCL9	330	527	16650	1.91478	1	0.66791	15.1802
GOTERM_BP_FAT	GO:0030111~regulation of Wnt signaling pathway	14	3.125	0.0104575	DIXDC1, DAB2IP, NFKB1, LGR5, CITED1, ZNRF3, GLI1, PSMD1, UBC, MCC, NFATC4, RBPJ, WWOX, CDK14	330	316	16650	2.23533	1	0.661264	17.797
GOTERM_BP_FAT	GO:0060070~canonical Wnt signaling pathway	13	2.90179	0.0111595	DIXDC1, DAB2IP, FZD3, NFKB1, PTEN, LGR5, ZNRF3, GLI1, PSMD1, UBC, MCC, RBPJ, BCL9	330	284	16650	2.30954	1	0.667322	18.8773
GOTERM_BP_FAT	GO:0060828~regulation of canonical Wnt signaling pathway	11	2.45536	0.0218846	DIXDC1, DAB2IP, PSMD1, UBC, NFKB1, MCC, RBPJ, LGR5, CDK14, ZNRF3, GLI1	330	241	16650	2.3029	1	0.722993	33.8011
GOTERM_BP_FAT	GO:0030178~negative regulation of Wnt signaling pathway	9	2.00893	0.046675	DAB2IP, PSMD1, UBC, MCC, NFATC4, ZNRF3, CITED1, WWOX, GLI1	330	201	16650	2.25916	1	0.798244	58.979
GOTERM_BP_FAT	GO:0090263~positive regulation of canonical Wnt signaling pathway	6	1.33929	0.0919894	DIXDC1, PSMD1, UBC, NFKB1, RBPJ, LGR5	330	121	16650	2.50188	1	0.875201	83.4529
GOTERM_BP_FAT	GO:2000027~regulation of organ morphogenesis	9	2.00893	0.127584	GPC4, PSMD1, UBC, FZD3, RBPJ, ZNRF3, CITED1, FOXP2, GLI1	330	252	16650	1.80195	1	0.903912	92.1484
GOTERM_BP_FAT	GO:0030177~positive regulation of Wnt signaling pathway	6	1.33929	0.189593	DIXDC1, PSMD1, UBC, NFKB1, RBPJ, LGR5	330	154	16650	1.96576	1	0.941515	98.0138
GOTERM_BP_FAT	GO:0090090~negative regulation of canonical Wnt signaling pathway	6	1.33929	0.228179	DAB2IP, PSMD1, UBC, MCC, ZNRF3, GLI1	330	165	16650	1.83471	1	0.952136	99.2
GOTERM_BP_FAT	GO:0050852~T cell receptor signaling pathway	6	1.33929	0.235432	SHB, PSMD1, UBC, NFKB1, PDE4D, PTEN	330	167	16650	1.81274	1	0.954435	99.3292
GOTERM_BP_FAT	GO:0007249~I-kappaB kinase/NF-kappaB signaling	7	1.5625	0.397724	DAB2IP, ATP2C1, OTUD7B, UBC, TGM2, NFKB1, CXXC5	330	257	16650	1.37425	1	0.98142	99.9921
GOTERM_BP_FAT	GO:0050851~antigen receptor-mediated signaling pathway	6	1.33929	0.471866	SHB, PSMD1, UBC, NFKB1, PDE4D, PTEN	330	228	16650	1.32775	1	0.986766	99.9993
GOTERM_BP_FAT	GO:0043122~regulation of I-kappaB kinase/NF-kappaB signaling	6	1.33929	0.505022	DAB2IP, ATP2C1, OTUD7B, UBC, TGM2, CXXC5	330	238	16650	1.27196	1	0.988868	99.9998
GOTERM_BP_FAT	GO:0038093~Fc receptor signaling pathway	6	1.33929	0.527605	ACTR3, PSMD1, UBC, PLA2G6, NFKB1, ARPC5	330	243	16650	1.24579	1	0.990392	99.9999
GOTERM_BP_FAT	GO:0071356~cellular response to tumor necrosis factor	6	1.33929	0.530564	DAB2IP, KRT8, PSMD1, UBC, SGMS1, GBA	330	244	16650	1.24069	1	0.990562	99.9999
GOTERM_BP_FAT	GO:0034612~response to tumor necrosis factor	6	1.33929	0.59694	DAB2IP, KRT8, PSMD1, UBC, SGMS1, GBA	330	263	16650	1.15105	1	0.993983	100
GOTERM_BP_FAT	GO:0002223~stimulatory C-type lectin receptor signaling pathway	3	0.669643	0.617527	PSMD1, UBC, NFKB1	330	105	16650	1.44156	1	0.994863	100
GOTERM_BP_FAT	GO:0002220~innate immune response activating cell surface receptor signaling pathway	3	0.669643	0.627794	PSMD1, UBC, NFKB1	330	107	16650	1.41461	1	0.995282	100
GOTERM_BP_FAT	GO:0038061~NIK/NF-kappaB signaling	3	0.669643	0.627794	PSMD1, UBC, NFKB1	330	107	16650	1.41461	1	0.995282	100
GOTERM_BP_FAT	GO:0043123~positive regulation of I-kappaB kinase/NF-kappaB signaling	4	0.892857	0.700964	ATP2C1, UBC, TGM2, CXXC5	330	182	16650	1.10889	1	0.99748	100
GOTERM_BP_FAT	GO:0051090~regulation of sequence-specific DNA binding transcription factor activity	7	1.5625	0.749834	DAB2IP, TRAPPC9, LRRC1, UBC, NFKB1, DDR2, PTEN	330	373	16650	0.946868	1	0.998406	100
GOTERM_BP_FAT	GO:0033209~tumor necrosis factor-mediated signaling pathway	3	0.669643	0.764018	KRT8, PSMD1, UBC	330	139	16650	1.08895	1	0.998651	100
GOTERM_BP_FAT	GO:0002758~innate immune response-activating signal transduction	4	0.892857	0.862179	DAB2IP, PSMD1, UBC, NFKB1	330	243	16650	0.830527	1	0.999742	100
GOTERM_BP_FAT	GO:0038095~Fc-epsilon receptor signaling pathway	3	0.669643	0.871956	PSMD1, UBC, NFKB1	330	179	16650	0.845607	1	0.999784	100
GOTERM_BP_FAT	GO:0034097~response to cytokine	13	2.90179	0.873889	DAB2IP, GCLC, NFKB1, SGMS1, CITED1, PSMD1, KRT8, TGM2, UBC, LRRC66, MKKS, PLCB1, GBA	330	802	16650	0.817842	1	0.999788	100
GOTERM_BP_FAT	GO:0002218~activation of innate immune response	4	0.892857	0.874663	DAB2IP, PSMD1, UBC, NFKB1	330	250	16650	0.807273	1	0.999792	100
GOTERM_BP_FAT	GO:0071345~cellular response to cytokine stimulus	11	2.45536	0.895671	DAB2IP, KRT8, PSMD1, UBC, TGM2, LRRC66, MKKS, NFKB1, SGMS1, PLCB1, GBA	330	706	16650	0.786119	1	0.999881	100
GOTERM_BP_FAT	GO:0045089~positive regulation of innate immune response	4	0.892857	0.930571	DAB2IP, PSMD1, UBC, NFKB1	330	292	16650	0.691158	1	0.999968	100
GOTERM_BP_FAT	GO:0006954~inflammatory response	9	2.00893	0.938643	DAB2IP, TGM2, MGLL, NFKB1, NFATC4, SGMS1, RBPJ, KDM6B, GBA	330	637	16650	0.712859	1	0.999978	100
GOTERM_BP_FAT	GO:0050727~regulation of inflammatory response	4	0.892857	0.94969	TGM2, MGLL, NFKB1, GBA	330	314	16650	0.642733	1	0.999988	100
GOTERM_BP_FAT	GO:0031349~positive regulation of defense response	5	1.11607	0.95915	DAB2IP, PSMD1, UBC, TGM2, NFKB1	330	402	16650	0.627544	1	0.999994	100
GOTERM_BP_FAT	GO:0019221~cytokine-mediated signaling pathway	7	1.5625	0.964852	KRT8, PSMD1, UBC, TGM2, LRRC66, MKKS, PLCB1	330	554	16650	0.637512	1	0.999996	100
GOTERM_BP_FAT	GO:0045088~regulation of innate immune response	4	0.892857	0.974941	DAB2IP, PSMD1, UBC, NFKB1	330	360	16650	0.560606	1	0.999999	100
GOTERM_BP_FAT	GO:0031347~regulation of defense response	7	1.5625	0.992857	DAB2IP, PSMD1, UBC, TGM2, MGLL, NFKB1, GBA	330	676	16650	0.522458	1	1	100
GOTERM_BP_FAT	GO:0006952~defense response	14	3.125	0.999914	DAB2IP, PSMD1, UBC, TGM2, MGLL, PLA2G6, NFKB1, NFATC4, SGMS1, RBPJ, GBP3, KDM6B, CITED1, GBA	330	1518	16650	0.465325	1	1	100
GOTERM_BP_FAT	GO:0045087~innate immune response	5	1.11607	0.99996	DAB2IP, PSMD1, UBC, NFKB1, CITED1	330	836	16650	0.301762	1	1	100
Annotation Cluster 65	Enrichment Score: 0.5605299383577323
Category	Term	Count	%	PValue	Genes	List Total	Pop Hits	Pop Total	Fold Enrichment	Bonferroni	Benjamini	FDR
GOTERM_BP_FAT	GO:2000026~regulation of multicellular organismal development	42	9.375	0.119864	SRCIN1, SOX5, DDR2, PTEN, ZNRF3, CITED1, GLI1, GPC4, SHB, TSC22D3, DAB1, PSMD1, CASZ1, NFATC4, UNC5D, FBN2, SEMA3A, BRINP3, PLCB1, INSR, AP3B1, NR2F1, KIF13B, ZBTB7B, RAP2A, DIXDC1, DAB2IP, EMX1, MINOS1-NBL1, FZD3, FOXP2, NOTCH3, SEMA6A, SLITRK3, NEDD4, ITGB1BP1, UBC, CNTN1, ZFPM2, ADGRL1, RBPJ, PHLDB2	330	1721	16650	1.23131	1	0.897374	90.7469
GOTERM_BP_FAT	GO:0051094~positive regulation of developmental process	26	5.80357	0.245445	SOX5, GLI1, ARX, SHB, DAB1, PLS1, MKKS, SEMA3A, FBN2, BRINP3, PLCB1, INSR, AP3B1, DAB2IP, MINOS1-NBL1, LMNA, FZD3, FOXP2, CTNNA2, SEMA6A, SLITRK3, CNTN1, ZFPM2, ADGRL1, RBPJ, PHLDB2	330	1089	16650	1.20461	1	0.956509	99.4753
GOTERM_BP_FAT	GO:0045595~regulation of cell differentiation	35	7.8125	0.284379	SRCIN1, SOX5, NFKB1, PTEN, DDR2, CITED1, GLI1, SHB, DAB1, CASZ1, UNC5D, NFATC4, FBN2, SEMA3A, BRINP3, PLCB1, AP3B1, NR2F1, KIF13B, ZBTB7B, RAP2A, DIXDC1, DAB2IP, EMX1, MINOS1-NBL1, FZD3, CTNNA2, NOTCH3, SEMA6A, NEDD4, ITGB1BP1, CNTN1, ZFPM2, RBPJ, PHLDB2	330	1544	16650	1.14372	1	0.965034	99.8046
GOTERM_BP_FAT	GO:0051240~positive regulation of multicellular organismal process	32	7.14286	0.314497	SOX5, NFKB1, DDR2, GLI1, ARX, SHB, DAB1, PLS1, MKKS, NFATC4, SEMA3A, FBN2, BRINP3, PLCB1, GBA, AP3B1, ERG, DAB2IP, ZBTB20, MINOS1-NBL1, FZD3, PDE4D, FOXP2, SEMA6A, SLITRK3, ITGB1BP1, CNTN1, PLA2G6, ZFPM2, ADGRL1, RBPJ, PHLDB2	330	1431	16650	1.12826	1	0.968937	99.9123
GOTERM_BP_FAT	GO:0045597~positive regulation of cell differentiation	17	3.79464	0.59868	DAB2IP, MINOS1-NBL1, SOX5, FZD3, NFKB1, DDR2, CTNNA2, SHB, SEMA6A, DAB1, CNTN1, FBN2, SEMA3A, BRINP3, RBPJ, PLCB1, AP3B1	330	841	16650	1.01989	1	0.994045	100
Annotation Cluster 66	Enrichment Score: 0.5514705497442877
Category	Term	Count	%	PValue	Genes	List Total	Pop Hits	Pop Total	Fold Enrichment	Bonferroni	Benjamini	FDR
GOTERM_MF_FAT	GO:0017137~Rab GTPase binding	6	1.33929	0.137012	TMEM127, KIF16B, TBC1D1, SYTL1, ANXA2, ADPRH	315	134	15478	2.20014	1	0.922158	89.5731
GOTERM_MF_FAT	GO:0017016~Ras GTPase binding	8	1.78571	0.305579	TMEM127, IQGAP2, KIF16B, TBC1D1, CDC42EP3, SYTL1, ANXA2, ADPRH	315	269	15478	1.46131	1	0.932199	99.6284
GOTERM_MF_FAT	GO:0051020~GTPase binding	9	2.00893	0.311691	TMEM127, FNBP1L, IQGAP2, KIF16B, TBC1D1, CDC42EP3, SYTL1, ANXA2, ADPRH	315	316	15478	1.39946	1	0.92991	99.6755
GOTERM_BP_FAT	GO:0031338~regulation of vesicle fusion	3	0.669643	0.354549	TBC1D1, ANXA2, ADPRH	330	63	16650	2.4026	1	0.975349	99.9715
GOTERM_MF_FAT	GO:0031267~small GTPase binding	8	1.78571	0.37789	TMEM127, IQGAP2, KIF16B, TBC1D1, CDC42EP3, SYTL1, ANXA2, ADPRH	315	291	15478	1.35083	1	0.945519	99.9312
Annotation Cluster 67	Enrichment Score: 0.5451706622238817
Category	Term	Count	%	PValue	Genes	List Total	Pop Hits	Pop Total	Fold Enrichment	Bonferroni	Benjamini	FDR
GOTERM_BP_FAT	GO:0071824~protein-DNA complex subunit organization	9	2.00893	0.148282	HIST1H2BO, TAF2, HIST1H3J, RAD51B, SMARCD2, UBC, ARID1A, CENPU, PTMA	330	262	16650	1.73317	1	0.919804	94.9817
GOTERM_BP_FAT	GO:0043044~ATP-dependent chromatin remodeling	4	0.892857	0.210321	SMARCD2, ARID1A, CENPU, PTMA	330	80	16650	2.52273	1	0.947519	98.7747
GOTERM_BP_FAT	GO:0034728~nucleosome organization	6	1.33929	0.27646	HIST1H2BO, HIST1H3J, SMARCD2, ARID1A, CENPU, PTMA	330	178	16650	1.70072	1	0.96399	99.7601
GOTERM_BP_FAT	GO:0006338~chromatin remodeling	5	1.11607	0.416172	SMARCD2, ARID1A, CENPU, PTMA, INO80C	330	166	16650	1.51972	1	0.982875	99.9956
GOTERM_BP_FAT	GO:0006333~chromatin assembly or disassembly	5	1.11607	0.523926	HIST1H2BO, HIST1H3J, SMARCD2, ARID1A, CENPU	330	191	16650	1.3208	1	0.990127	99.9999
Annotation Cluster 68	Enrichment Score: 0.5416349193227559
Category	Term	Count	%	PValue	Genes	List Total	Pop Hits	Pop Total	Fold Enrichment	Bonferroni	Benjamini	FDR
GOTERM_BP_FAT	GO:0010721~negative regulation of cell development	12	2.67857	0.0419442	NOTCH3, SHB, SEMA6A, DIXDC1, DAB2IP, DAB1, ITGB1BP1, NFATC4, SEMA3A, PTEN, CITED1, NR2F1	330	306	16650	1.97861	1	0.790266	55.0134
GOTERM_BP_FAT	GO:0060284~regulation of cell development	24	5.35714	0.0800102	DIXDC1, RAP2A, DAB2IP, EMX1, SRCIN1, MINOS1-NBL1, FZD3, PTEN, CITED1, NOTCH3, SHB, SEMA6A, DAB1, NEDD4, ITGB1BP1, CASZ1, CNTN1, NFATC4, UNC5D, SEMA3A, BRINP3, PHLDB2, NR2F1, KIF13B	330	851	16650	1.42292	1	0.86269	78.8731
GOTERM_BP_FAT	GO:0051241~negative regulation of multicellular organismal process	24	5.35714	0.28082	DIXDC1, DAB2IP, PTPRR, NFKB1, FZD3, PDE4D, PTEN, CITED1, ANXA2, NOTCH3, SHB, SEMA6A, TSC22D3, DAB1, ITGB1BP1, UBC, OTUD7B, ZFPM2, NFATC4, MCC, SEMA3A, RBPJ, GBA, NR2F1	330	1017	16650	1.19067	1	0.964716	99.7856
GOTERM_BP_FAT	GO:0001944~vasculature development	15	3.34821	0.324406	DAB2IP, ARID1A, C5ORF42, PTEN, CITED1, ANXA2, NOTCH3, IMMP2L, SHB, EPGN, NEDD4, ITGB1BP1, NFATC4, ZFPM2, RBPJ	330	610	16650	1.24069	1	0.969921	99.9332
GOTERM_BP_FAT	GO:0048646~anatomical structure formation involved in morphogenesis	26	5.80357	0.335622	SHROOM3, C5ORF42, PTEN, SHB, ATXN10, KRT8, TGM2, MKKS, NFATC4, FBN2, IPMK, ERG, DAB2IP, ARID1A, FZD3, KIF16B, CAPN2, ANXA2, NOTCH3, FNBP1L, EPGN, ITGB1BP1, FER1L5, RBPJ, PHLDB2, KDM6B	330	1151	16650	1.13972	1	0.972223	99.9511
GOTERM_BP_FAT	GO:0001568~blood vessel development	14	3.125	0.344341	NOTCH3, SHB, DAB2IP, EPGN, NEDD4, ITGB1BP1, ZFPM2, NFATC4, ARID1A, C5ORF42, RBPJ, PTEN, CITED1, ANXA2	330	576	16650	1.22633	1	0.973278	99.9618
GOTERM_BP_FAT	GO:0048514~blood vessel morphogenesis	12	2.67857	0.378456	NOTCH3, SHB, DAB2IP, EPGN, NEDD4, ITGB1BP1, NFATC4, ZFPM2, RBPJ, PTEN, CITED1, ANXA2	330	491	16650	1.2331	1	0.979955	99.9859
GOTERM_BP_FAT	GO:0072358~cardiovascular system development	21	4.6875	0.408234	DAB2IP, ERG, LMNA, ARID1A, C5ORF42, PTEN, CITED1, ANXA2, NOTCH3, SHB, IMMP2L, EPGN, NEDD4, XIRP2, ITGB1BP1, MKKS, ZFPM2, NFATC4, RBPJ, INSR, KDM6B	330	945	16650	1.12121	1	0.98239	99.9943
GOTERM_BP_FAT	GO:0072359~circulatory system development	21	4.6875	0.408234	DAB2IP, ERG, LMNA, ARID1A, C5ORF42, PTEN, CITED1, ANXA2, NOTCH3, SHB, IMMP2L, EPGN, NEDD4, XIRP2, ITGB1BP1, MKKS, ZFPM2, NFATC4, RBPJ, INSR, KDM6B	330	945	16650	1.12121	1	0.98239	99.9943
GOTERM_BP_FAT	GO:0051093~negative regulation of developmental process	16	3.57143	0.497765	DIXDC1, DAB2IP, FZD3, PTEN, CITED1, NOTCH3, SHB, SEMA6A, TSC22D3, DAB1, ITGB1BP1, NFATC4, ZFPM2, SEMA3A, PHLDB2, NR2F1	330	739	16650	1.09239	1	0.988359	99.9997
GOTERM_BP_FAT	GO:0045596~negative regulation of cell differentiation	14	3.125	0.498123	DIXDC1, DAB2IP, PTEN, CITED1, NOTCH3, SHB, SEMA6A, DAB1, ITGB1BP1, NFATC4, ZFPM2, SEMA3A, RBPJ, NR2F1	330	640	16650	1.10369	1	0.988331	99.9997
GOTERM_BP_FAT	GO:0001525~angiogenesis	9	2.00893	0.572813	NOTCH3, SHB, DAB2IP, EPGN, ITGB1BP1, NFATC4, RBPJ, PTEN, ANXA2	330	413	16650	1.09949	1	0.992954	100
Annotation Cluster 69	Enrichment Score: 0.537628656922848
Category	Term	Count	%	PValue	Genes	List Total	Pop Hits	Pop Total	Fold Enrichment	Bonferroni	Benjamini	FDR
GOTERM_BP_FAT	GO:0019433~triglyceride catabolic process	3	0.669643	0.138001	MGLL, FGF21, LIPC	330	33	16650	4.58678	1	0.910873	93.7237
GOTERM_BP_FAT	GO:0044242~cellular lipid catabolic process	7	1.5625	0.152593	ACOX2, FAAH, MGLL, FGF21, LIPC, ETFA, GBA	330	182	16650	1.94056	1	0.923738	95.4346
GOTERM_BP_FAT	GO:0046464~acylglycerol catabolic process	3	0.669643	0.179751	MGLL, FGF21, LIPC	330	39	16650	3.88112	1	0.939475	97.5125
GOTERM_BP_FAT	GO:0046461~neutral lipid catabolic process	3	0.669643	0.179751	MGLL, FGF21, LIPC	330	39	16650	3.88112	1	0.939475	97.5125
GOTERM_BP_FAT	GO:0046503~glycerolipid catabolic process	3	0.669643	0.259748	MGLL, FGF21, LIPC	330	50	16650	3.02727	1	0.960624	99.6328
GOTERM_BP_FAT	GO:0006641~triglyceride metabolic process	3	0.669643	0.607045	MGLL, FGF21, LIPC	330	103	16650	1.46955	1	0.994479	100
GOTERM_BP_FAT	GO:0006639~acylglycerol metabolic process	3	0.669643	0.680451	MGLL, FGF21, LIPC	330	118	16650	1.28274	1	0.996911	100
GOTERM_BP_FAT	GO:0006638~neutral lipid metabolic process	3	0.669643	0.684924	MGLL, FGF21, LIPC	330	119	16650	1.27196	1	0.997062	100
Annotation Cluster 70	Enrichment Score: 0.534619498203597
Category	Term	Count	%	PValue	Genes	List Total	Pop Hits	Pop Total	Fold Enrichment	Bonferroni	Benjamini	FDR
GOTERM_BP_FAT	GO:0003197~endocardial cushion development	3	0.669643	0.186889	ERG, NEDD4, RBPJ	330	40	16650	3.78409	1	0.939942	97.8865
GOTERM_BP_FAT	GO:0003007~heart morphogenesis	7	1.5625	0.303475	ERG, NEDD4, XIRP2, MKKS, ZFPM2, RBPJ, INSR	330	230	16650	1.53557	1	0.967944	99.882
GOTERM_BP_FAT	GO:0060485~mesenchyme development	7	1.5625	0.317321	SEMA6A, ERG, DAB2IP, NEDD4, ZFPM2, SEMA3A, RBPJ	330	234	16650	1.50932	1	0.969388	99.9188
GOTERM_BP_FAT	GO:0003151~outflow tract morphogenesis	3	0.669643	0.40394	NEDD4, ZFPM2, RBPJ	330	70	16650	2.16234	1	0.981658	99.9935
Annotation Cluster 71	Enrichment Score: 0.5315646871212621
Category	Term	Count	%	PValue	Genes	List Total	Pop Hits	Pop Total	Fold Enrichment	Bonferroni	Benjamini	FDR
GOTERM_CC_FAT	GO:0030659~cytoplasmic vesicle membrane	14	3.125	0.1816	EPS15, SCAMP1, LNPEP, CADPS, KCNJ4, BAIAP2L2, SYT5, SYN2, SPRED2, UBC, SYT7, MYOF, KIFC3, AP3B1	290	491	14527	1.42832	1	0.843793	94.3783
GOTERM_CC_FAT	GO:0012506~vesicle membrane	14	3.125	0.211638	EPS15, SCAMP1, LNPEP, CADPS, KCNJ4, BAIAP2L2, SYT5, SYN2, SPRED2, UBC, SYT7, MYOF, KIFC3, AP3B1	290	507	14527	1.38324	1	0.861788	96.7145
GOTERM_CC_FAT	GO:0016023~cytoplasmic, membrane-bounded vesicle	27	6.02679	0.328821	SYT5, MYO7A, ASTN1, SYT7, ASTN2, KIFC3, LNPEP, STX12, SLC2A1, SYN2, SPRED2, MYOF, GLIPR1L1, AP3B1, GPR107, STX6, SCAMP1, DDC, DAB2IP, BAIAP2L2, ANXA2, EPS15, CADPS, KCNJ4, FNBP1L, UBC, SYTL1	290	1183	14527	1.14329	1	0.883671	99.6743
GOTERM_CC_FAT	GO:0030658~transport vesicle membrane	5	1.11607	0.385293	SCAMP1, SYT5, SYN2, SPRED2, SYT7	290	158	14527	1.58522	1	0.910488	99.9078
GOTERM_CC_FAT	GO:0044433~cytoplasmic vesicle part	14	3.125	0.451561	EPS15, SCAMP1, LNPEP, CADPS, KCNJ4, BAIAP2L2, SYT5, SYN2, SPRED2, UBC, SYT7, MYOF, KIFC3, AP3B1	290	615	14527	1.14033	1	0.919604	99.9821
Annotation Cluster 72	Enrichment Score: 0.5301147806627001
Category	Term	Count	%	PValue	Genes	List Total	Pop Hits	Pop Total	Fold Enrichment	Bonferroni	Benjamini	FDR
GOTERM_BP_FAT	GO:0038127~ERBB signaling pathway	7	1.5625	0.0736229	EPS15, DAB2IP, EPGN, PTPRR, UBC, KIF16B, RBPJ	330	148	16650	2.38636	1	0.85693	75.9646
GOTERM_BP_FAT	GO:1901184~regulation of ERBB signaling pathway	5	1.11607	0.0936018	EPS15, DAB2IP, EPGN, UBC, RBPJ	330	87	16650	2.89969	1	0.875892	83.9922
GOTERM_BP_FAT	GO:1901186~positive regulation of ERBB signaling pathway	3	0.669643	0.158615	EPGN, UBC, RBPJ	330	36	16650	4.20455	1	0.928262	96.003
GOTERM_BP_FAT	GO:0007173~epidermal growth factor receptor signaling pathway	5	1.11607	0.213466	EPS15, DAB2IP, EPGN, UBC, KIF16B	330	120	16650	2.10227	1	0.948703	98.8625
GOTERM_BP_FAT	GO:0042059~negative regulation of epidermal growth factor receptor signaling pathway	3	0.669643	0.223079	EPS15, DAB2IP, UBC	330	45	16650	3.36364	1	0.950887	99.0956
GOTERM_BP_FAT	GO:1901185~negative regulation of ERBB signaling pathway	3	0.669643	0.230389	EPS15, DAB2IP, UBC	330	46	16650	3.29051	1	0.952499	99.2417
GOTERM_BP_FAT	GO:0042058~regulation of epidermal growth factor receptor signaling pathway	4	0.892857	0.231064	EPS15, DAB2IP, EPGN, UBC	330	84	16650	2.4026	1	0.952168	99.254
GOTERM_BP_FAT	GO:0000187~activation of MAPK activity	4	0.892857	0.553489	DAB2IP, EPGN, UBC, INSR	330	146	16650	1.38232	1	0.991707	100
GOTERM_CC_FAT	GO:0030139~endocytic vesicle	6	1.33929	0.589572	EPS15, STX6, DAB2IP, STX12, UBC, SYT7	290	259	14527	1.16046	1	0.956966	99.9997
GOTERM_BP_FAT	GO:0032147~activation of protein kinase activity	6	1.33929	0.704705	DAB2IP, EPGN, ITGB1BP1, UBC, INSR, RPTOR	330	298	16650	1.01586	1	0.99751	100
GOTERM_BP_FAT	GO:0043406~positive regulation of MAP kinase activity	4	0.892857	0.805874	DAB2IP, EPGN, UBC, INSR	330	217	16650	0.930038	1	0.999246	100
GOTERM_BP_FAT	GO:0071902~positive regulation of protein serine/threonine kinase activity	5	1.11607	0.847378	DAB2IP, EPGN, UBC, INSR, RPTOR	330	300	16650	0.840909	1	0.999644	100
Annotation Cluster 73	Enrichment Score: 0.5222374893924188
Category	Term	Count	%	PValue	Genes	List Total	Pop Hits	Pop Total	Fold Enrichment	Bonferroni	Benjamini	FDR
GOTERM_BP_FAT	GO:0030301~cholesterol transport	4	0.892857	0.175155	STX12, NFKB1, SYT7, LIPC	330	73	16650	2.76463	1	0.936936	97.2395
GOTERM_BP_FAT	GO:0015918~sterol transport	4	0.892857	0.185032	STX12, NFKB1, SYT7, LIPC	330	75	16650	2.69091	1	0.93975	97.7947
GOTERM_BP_FAT	GO:0015850~organic hydroxy compound transport	6	1.33929	0.341977	CADPS, SLC2A13, STX12, NFKB1, SYT7, LIPC	330	195	16650	1.55245	1	0.973056	99.9591
GOTERM_BP_FAT	GO:0006869~lipid transport	8	1.78571	0.419131	STX12, PITPNM3, PLEKHA8, PLA2G6, NFKB1, SYT7, SLCO3A1, LIPC	330	312	16650	1.29371	1	0.98302	99.996
GOTERM_BP_FAT	GO:0010876~lipid localization	8	1.78571	0.526981	STX12, PITPNM3, PLEKHA8, PLA2G6, NFKB1, SYT7, SLCO3A1, LIPC	330	342	16650	1.18022	1	0.99038	99.9999
Annotation Cluster 74	Enrichment Score: 0.5207032579263196
Category	Term	Count	%	PValue	Genes	List Total	Pop Hits	Pop Total	Fold Enrichment	Bonferroni	Benjamini	FDR
GOTERM_MF_FAT	GO:0035591~signaling adaptor activity	4	0.892857	0.210692	SHB, DAB2IP, SH3BP2, BCAR3	315	78	15478	2.51982	1	0.90809	97.3484
GOTERM_MF_FAT	GO:0060090~binding, bridging	6	1.33929	0.29841	SHB, DAB2IP, BAIAP2L2, RPTOR, SH3BP2, BCAR3	315	179	15478	1.64703	1	0.932126	99.5649
GOTERM_MF_FAT	GO:0005070~SH3/SH2 adaptor activity	3	0.669643	0.314729	SHB, SH3BP2, BCAR3	315	56	15478	2.63231	1	0.927146	99.6968
GOTERM_MF_FAT	GO:0030674~protein binding, bridging	5	1.11607	0.417629	SHB, BAIAP2L2, RPTOR, SH3BP2, BCAR3	315	162	15478	1.51656	1	0.953941	99.975
Annotation Cluster 75	Enrichment Score: 0.5188375121769228
Category	Term	Count	%	PValue	Genes	List Total	Pop Hits	Pop Total	Fold Enrichment	Bonferroni	Benjamini	FDR
GOTERM_CC_FAT	GO:0044448~cell cortex part	5	1.11607	0.259659	SLC2A1, PLS1, CAPN2, PCLO, PHLDB2	290	130	14527	1.92666	1	0.860294	98.6678
GOTERM_CC_FAT	GO:0030863~cortical cytoskeleton	4	0.892857	0.276857	SLC2A1, PLS1, CAPN2, PCLO	290	92	14527	2.17796	1	0.86323	99.0495
GOTERM_CC_FAT	GO:0030864~cortical actin cytoskeleton	3	0.669643	0.386216	SLC2A1, PLS1, CAPN2	290	67	14527	2.24297	1	0.908976	99.9098
Annotation Cluster 76	Enrichment Score: 0.5150443898940069
Category	Term	Count	%	PValue	Genes	List Total	Pop Hits	Pop Total	Fold Enrichment	Bonferroni	Benjamini	FDR
GOTERM_MF_FAT	GO:0001105~RNA polymerase II transcription coactivator activity	3	0.669643	0.17982	ZFPM2, CITED1, WWOX	315	38	15478	3.8792	1	0.912018	95.223
GOTERM_MF_FAT	GO:0001191~transcriptional repressor activity, RNA polymerase II transcription factor binding	4	0.892857	0.259164	ELP2, ZFPM2, CITED1, WWOX	315	87	15478	2.25915	1	0.917125	98.9972
GOTERM_MF_FAT	GO:0001190~transcriptional activator activity, RNA polymerase II transcription factor binding	3	0.669643	0.299716	ZFPM2, CITED1, WWOX	315	54	15478	2.72981	1	0.931351	99.5772
GOTERM_MF_FAT	GO:0098811~transcriptional repressor activity, RNA polymerase II activating transcription factor binding	3	0.669643	0.299716	ZFPM2, CITED1, WWOX	315	54	15478	2.72981	1	0.931351	99.5772
GOTERM_MF_FAT	GO:0001076~transcription factor activity, RNA polymerase II transcription factor binding	5	1.11607	0.339457	TAF2, ELP2, ZFPM2, CITED1, WWOX	315	145	15478	1.69436	1	0.933403	99.8275
GOTERM_MF_FAT	GO:0001104~RNA polymerase II transcription cofactor activity	3	0.669643	0.571633	ZFPM2, CITED1, WWOX	315	94	15478	1.56819	1	0.982081	99.9998
Annotation Cluster 77	Enrichment Score: 0.5039497650536446
Category	Term	Count	%	PValue	Genes	List Total	Pop Hits	Pop Total	Fold Enrichment	Bonferroni	Benjamini	FDR
GOTERM_BP_FAT	GO:0007605~sensory perception of sound	6	1.33929	0.153668	EML2, SLC1A3, CNTN5, NAV2, MYO7A, MKKS	330	143	16650	2.11697	1	0.924495	95.5413
GOTERM_BP_FAT	GO:0050954~sensory perception of mechanical stimulus	6	1.33929	0.203348	EML2, SLC1A3, CNTN5, NAV2, MYO7A, MKKS	330	158	16650	1.916	1	0.944926	98.5565
GOTERM_BP_FAT	GO:0007600~sensory perception	12	2.67857	0.984754	EML2, SLC1A3, LAMB2, EYS, CNTN5, PDE1C, NAV2, MYO7A, MKKS, MGLL, DLG2, KIFC3	330	961	16650	0.630026	1	1	100
Annotation Cluster 78	Enrichment Score: 0.5028148770656774
Category	Term	Count	%	PValue	Genes	List Total	Pop Hits	Pop Total	Fold Enrichment	Bonferroni	Benjamini	FDR
GOTERM_CC_FAT	GO:0070062~extracellular exosome	62	13.8393	0.243127	IQGAP2, SYT7, PTMA, DDR2, LSR, KIFC3, GPC4, ACTR3, CISD1, DNAJC11, WWP1, PSMD1, SLC2A1, PLS1, PDE8A, PLCB1, INSR, BPNT1, RAP2B, DDC, TM9SF2, RAP2A, DAB2IP, PDXK, CLMP, CYSRT1, PCLO, PADI1, GRM5, MTMR11, PFDN2, FNBP1L, ITGB1BP1, UBC, CNTN1, PPM1L, ADAMTS3, FUT8, CPQ, ARPC5, ALCAM, NUMA1, LAMB2, STX12, KRT8, PPP2CB, TGM2, ENO2, RPL5, MYOF, GBA, ETFA, PLEC, HIST1H3J, RPL26, CAPN2, ANXA2, EYS, NEDD4,…	290	2811	14527	1.10486	1	0.866194	98.1705
GOTERM_CC_FAT	GO:1903561~extracellular vesicle	62	13.8393	0.256572	IQGAP2, SYT7, PTMA, DDR2, LSR, KIFC3, GPC4, ACTR3, CISD1, DNAJC11, WWP1, PSMD1, SLC2A1, PLS1, PDE8A, PLCB1, INSR, BPNT1, RAP2B, DDC, TM9SF2, RAP2A, DAB2IP, PDXK, CLMP, CYSRT1, PCLO, PADI1, GRM5, MTMR11, PFDN2, FNBP1L, ITGB1BP1, UBC, CNTN1, PPM1L, ADAMTS3, FUT8, CPQ, ARPC5, ALCAM, NUMA1, LAMB2, STX12, KRT8, PPP2CB, TGM2, ENO2, RPL5, MYOF, GBA, ETFA, PLEC, HIST1H3J, RPL26, CAPN2, ANXA2, EYS, NEDD4,…	290	2825	14527	1.09939	1	0.86759	98.5858
GOTERM_CC_FAT	GO:0043230~extracellular organelle	62	13.8393	0.257545	IQGAP2, SYT7, PTMA, DDR2, LSR, KIFC3, GPC4, ACTR3, CISD1, DNAJC11, WWP1, PSMD1, SLC2A1, PLS1, PDE8A, PLCB1, INSR, BPNT1, RAP2B, DDC, TM9SF2, RAP2A, DAB2IP, PDXK, CLMP, CYSRT1, PCLO, PADI1, GRM5, MTMR11, PFDN2, FNBP1L, ITGB1BP1, UBC, CNTN1, PPM1L, ADAMTS3, FUT8, CPQ, ARPC5, ALCAM, NUMA1, LAMB2, STX12, KRT8, PPP2CB, TGM2, ENO2, RPL5, MYOF, GBA, ETFA, PLEC, HIST1H3J, RPL26, CAPN2, ANXA2, EYS, NEDD4,…	290	2826	14527	1.099	1	0.865066	98.6121
GOTERM_CC_FAT	GO:0031988~membrane-bounded vesicle	78	17.4107	0.25866	SYT5, MYO7A, IQGAP2, SYT7, LSR, DDR2, PTMA, KIFC3, ACTR3, GPC4, LNPEP, CISD1, WWP1, DNAJC11, SLC2A1, PSMD1, PLS1, SPRED2, PDE8A, PLCB1, BPNT1, INSR, AP3B1, SCAMP1, STX6, RAP2B, TM9SF2, DDC, RAP2A, DAB2IP, CLMP, PDXK, CYSRT1, PCLO, PADI1, GRM5, MTMR11, PFDN2, FNBP1L, ITGB1BP1, UBC, CNTN1, PPM1L, ADAMTS3, FUT8, CPQ, ASTN1, ARPC5, ASTN2, ALCAM, NUMA1, LAMB2, STX12, KRT8, PPP2CB, SYN2, ENO2, TGM2, RP…	290	3611	14527	1.08204	1	0.862738	98.6417
GOTERM_CC_FAT	GO:0044421~extracellular region part	81	18.0804	0.372693	IL16, IQGAP2, SYT7, LSR, DDR2, PTMA, KIFC3, GPC4, ACTR3, RTBDN, CISD1, SLC1A3, ATXN10, WWP1, DNAJC11, SLC2A1, PSMD1, PLS1, PDE8A, SEMA3A, PLCB1, BPNT1, INSR, RAP2B, TM9SF2, DDC, RAP2A, DAB2IP, YARS, CLMP, PDXK, MINOS1-NBL1, CYSRT1, MDGA1, PTPRR, FGF21, PCLO, PADI1, GRM5, MTMR11, RALGAPA2, PFDN2, INHBE, FNBP1L, NAV2, ITGB1BP1, UBC, PLA2G6, CNTN1, KDSR, PPM1L, ADAMTS3, FUT8, CPQ, ARPC5, ALCAM, NUMA…	290	3878	14527	1.0463	1	0.90332	99.8767
GOTERM_CC_FAT	GO:0005576~extracellular region	91	20.3125	0.621064	IL16, NELL2, IQGAP2, SYT7, LSR, PTEN, DDR2, PTMA, KIFC3, ACTR3, LNPEP, GPC4, RTBDN, SLC1A3, CISD1, ATXN10, WWP1, DNAJC11, SLC2A1, PSMD1, PLS1, PDE8A, SEMA3A, BRINP3, PLCB1, BPNT1, INSR, RAP2B, RAP2A, TM9SF2, DDC, DAB2IP, YARS, CLMP, PDXK, MINOS1-NBL1, CYSRT1, MDGA1, PTPRR, COLEC10, FGF21, PCLO, PADI1, GRM5, MTMR11, RALGAPA2, PFDN2, INHBE, FNBP1L, NAV2, ITGB1BP1, UBC, PLA2G6, CNTN1, KDSR, PPM1L, A…	290	4623	14527	0.986042	1	0.964275	99.9999
Annotation Cluster 79	Enrichment Score: 0.5024954875054932
Category	Term	Count	%	PValue	Genes	List Total	Pop Hits	Pop Total	Fold Enrichment	Bonferroni	Benjamini	FDR
GOTERM_BP_FAT	GO:0015012~heparan sulfate proteoglycan biosynthetic process	3	0.669643	0.0927645	HS6ST3, EXT1, GLCE	330	26	16650	5.82168	1	0.874783	83.7142
GOTERM_BP_FAT	GO:0030201~heparan sulfate proteoglycan metabolic process	3	0.669643	0.138001	HS6ST3, EXT1, GLCE	330	33	16650	4.58678	1	0.910873	93.7237
GOTERM_BP_FAT	GO:0030166~proteoglycan biosynthetic process	3	0.669643	0.340161	HS6ST3, EXT1, GLCE	330	61	16650	2.48137	1	0.973027	99.957
GOTERM_BP_FAT	GO:0006029~proteoglycan metabolic process	3	0.669643	0.515444	HS6ST3, EXT1, GLCE	330	87	16650	1.73981	1	0.989644	99.9999
GOTERM_BP_FAT	GO:0044272~sulfur compound biosynthetic process	5	1.11607	0.575778	GCLC, HS6ST3, DLAT, EXT1, GLCE	330	204	16650	1.23663	1	0.993089	100
GOTERM_BP_FAT	GO:0006790~sulfur compound metabolic process	7	1.5625	0.747552	NDOR1, GCLC, HS6ST3, DLAT, EXT1, BPNT1, GLCE	330	372	16650	0.949413	1	0.998362	100
Annotation Cluster 80	Enrichment Score: 0.5004694694665554
Category	Term	Count	%	PValue	Genes	List Total	Pop Hits	Pop Total	Fold Enrichment	Bonferroni	Benjamini	FDR
GOTERM_BP_FAT	GO:0043409~negative regulation of MAPK cascade	9	2.00893	0.00960566	IGF1R, DAB2IP, RGS3, ITGB1BP1, PTPRR, SPRED2, MECOM, PTEN, GBA	330	149	16650	3.04759	1	0.658536	16.4677
GOTERM_BP_FAT	GO:0006469~negative regulation of protein kinase activity	11	2.45536	0.019745	SHB, IGF1R, DAB2IP, PPM1E, SRCIN1, RGS3, ITGB1BP1, SPRED2, LRRC66, PTEN, GBA	330	237	16650	2.34177	1	0.717406	31.0489
GOTERM_BP_FAT	GO:0051348~negative regulation of transferase activity	14	3.125	0.0258136	SHB, IGF1R, DAB2IP, PPM1E, SRCIN1, RGS3, ITGB1BP1, ANAPC4, PSMD1, SPRED2, UBC, LRRC66, PTEN, GBA	330	357	16650	1.97861	1	0.753155	38.5866
GOTERM_BP_FAT	GO:0033673~negative regulation of kinase activity	11	2.45536	0.0300737	SHB, IGF1R, DAB2IP, PPM1E, SRCIN1, RGS3, ITGB1BP1, SPRED2, LRRC66, PTEN, GBA	330	254	16650	2.18504	1	0.768342	43.4047
GOTERM_BP_FAT	GO:0001933~negative regulation of protein phosphorylation	14	3.125	0.0492433	SHB, IGF1R, DAB2IP, PPM1E, SRCIN1, RGS3, ITGB1BP1, PTPRR, SPRED2, LRRC66, PDE4D, MECOM, PTEN, GBA	330	393	16650	1.79736	1	0.808099	60.991
GOTERM_BP_FAT	GO:0031400~negative regulation of protein modification process	18	4.01786	0.0677848	DAB2IP, GCLC, SRCIN1, ANAPC4, PTPRR, PDE4D, MECOM, PTEN, SHB, IGF1R, PPM1E, RGS3, ITGB1BP1, PSMD1, UBC, SPRED2, LRRC66, GBA	330	578	16650	1.57125	1	0.848878	72.9782
GOTERM_BP_FAT	GO:0042326~negative regulation of phosphorylation	14	3.125	0.0839005	SHB, IGF1R, DAB2IP, PPM1E, SRCIN1, RGS3, ITGB1BP1, PTPRR, SPRED2, LRRC66, PDE4D, MECOM, PTEN, GBA	330	428	16650	1.65038	1	0.860877	80.4779
GOTERM_BP_FAT	GO:1902532~negative regulation of intracellular signal transduction	14	3.125	0.11689	IGF1R, DAB2IP, TMEM127, DAB1, RGS3, ITGB1BP1, PPP2CB, PTPRR, SPRED2, OTUD7B, LRRC66, MECOM, PTEN, GBA	330	454	16650	1.55587	1	0.897268	90.1465
GOTERM_BP_FAT	GO:0043407~negative regulation of MAP kinase activity	4	0.892857	0.170274	DAB2IP, RGS3, SPRED2, GBA	330	72	16650	2.80303	1	0.935179	96.9185
GOTERM_BP_FAT	GO:0016310~phosphorylation	51	11.3839	0.185033	SRCIN1, NFKB1, SGMS1, DDR2, PTEN, SHB, DAB1, PSMD1, SPRED2, PDE8A, PLCB1, IPMK, INSR, USP15, BPNT1, CDK14, SIK3, RAP2B, RAP2A, DAB2IP, PDXK, PTPRR, PDE4D, FGF21, MECOM, NDUFA10, RPTOR, MAST1, PPM1E, INHBE, ITGB1BP1, UBC, PLA2G6, CNTN1, LRRC66, TNNI3K, PPM1L, FN3K, FPGT-TNNI3K, PLCL1, IGF1R, DGKB, ENO2, GBA, ERG, TRIO, AK5, ANXA2, EPGN, RGS3, BCAR3	330	2229	16650	1.15441	1	0.939186	97.7948
GOTERM_BP_FAT	GO:0045936~negative regulation of phosphate metabolic process	15	3.34821	0.191169	SHB, IGF1R, DAB2IP, PPM1E, SRCIN1, RGS3, ITGB1BP1, PTPRR, SPRED2, LRRC66, PDE4D, MECOM, PTEN, DLG2, GBA	330	544	16650	1.39121	1	0.94142	98.0846
GOTERM_BP_FAT	GO:0010563~negative regulation of phosphorus metabolic process	15	3.34821	0.191169	SHB, IGF1R, DAB2IP, PPM1E, SRCIN1, RGS3, ITGB1BP1, PTPRR, SPRED2, LRRC66, PDE4D, MECOM, PTEN, DLG2, GBA	330	544	16650	1.39121	1	0.94142	98.0846
GOTERM_BP_FAT	GO:1902531~regulation of intracellular signal transduction	40	8.92857	0.193524	RALGPS2, UBE3A, CXXC5, PTEN, IGF1R, TMEM127, ARHGAP20, DAB1, PPP2CB, OTUD7B, NFAT5, SPRED2, TGM2, PDE8A, PLCB1, INSR, GBA, TAF2, RAP2A, ARHGEF3, ELP2, DAB2IP, PTPRR, TRIO, PDE4D, FGF21, MECOM, RPTOR, ARHGEF11, RALGAPA2, EPGN, NEDD4, INHBE, RGS3, ATP2C1, ITGB1BP1, UBC, LRRC66, PLA2G6, ARHGAP10	330	1714	16650	1.17747	1	0.941544	98.1859
GOTERM_BP_FAT	GO:0001932~regulation of protein phosphorylation	31	6.91964	0.210561	SRCIN1, PTEN, DDR2, SHB, IGF1R, PLCL1, DAB1, SPRED2, PDE8A, PLCB1, INSR, GBA, RAP2B, RAP2A, DAB2IP, PTPRR, PDE4D, FGF21, MECOM, RPTOR, ANXA2, PPM1E, EPGN, INHBE, RGS3, ITGB1BP1, UBC, LRRC66, CNTN1, PLA2G6, BCAR3	330	1300	16650	1.20315	1	0.94725	98.7816
GOTERM_BP_FAT	GO:0090068~positive regulation of cell cycle process	8	1.78571	0.229514	RAD51B, DAB2IP, CYP1A1, EPGN, UBC, PLCB1, INSR, RPTOR	330	251	16650	1.60811	1	0.95269	99.2255
GOTERM_BP_FAT	GO:0031399~regulation of protein modification process	38	8.48214	0.239782	GCLC, SRCIN1, UBE3A, PPP6R1, PAXBP1, PTEN, DDR2, PLCL1, IGF1R, SHB, DAB1, PSMD1, SPRED2, PDE8A, PLCB1, INSR, GBA, RAP2B, RAP2A, DAB2IP, ANAPC4, PTPRR, PDE4D, FGF21, MECOM, RPTOR, ANXA2, HSPBP1, PPM1E, EPGN, INHBE, RGS3, ITGB1BP1, UBC, LRRC66, CNTN1, PLA2G6, BCAR3	330	1664	16650	1.15221	1	0.955435	99.3968
GOTERM_BP_FAT	GO:0071901~negative regulation of protein serine/threonine kinase activity	5	1.11607	0.242969	DAB2IP, RGS3, SPRED2, PTEN, GBA	330	127	16650	1.9864	1	0.956022	99.4423
GOTERM_BP_FAT	GO:0006468~protein phosphorylation	42	9.375	0.243564	SRCIN1, FPGT-TNNI3K, NFKB1, DDR2, PTEN, PLCL1, IGF1R, SHB, DAB1, PSMD1, SPRED2, PDE8A, PLCB1, USP15, INSR, CDK14, SIK3, GBA, RAP2B, RAP2A, ERG, DAB2IP, PTPRR, TRIO, PDE4D, FGF21, MECOM, RPTOR, ANXA2, MAST1, PPM1E, EPGN, INHBE, RGS3, ITGB1BP1, UBC, LRRC66, CNTN1, TNNI3K, PLA2G6, PPM1L, BCAR3	330	1852	16650	1.14422	1	0.955661	99.4504
GOTERM_BP_FAT	GO:0043408~regulation of MAPK cascade	17	3.79464	0.267457	RAP2A, DAB2IP, PTPRR, FGF21, MECOM, PTEN, IGF1R, EPGN, INHBE, RGS3, ITGB1BP1, UBC, SPRED2, PDE8A, PLCB1, INSR, GBA	330	678	16650	1.26508	1	0.962323	99.6979
GOTERM_BP_FAT	GO:0035556~intracellular signal transduction	58	12.9464	0.268177	NFKB1, PTEN, DAB1, ARHGAP20, PSMD1, SPRED2, PDE8A, AGAP1, PLCB1, INSR, AGAP3, WWOX, RAP2B, ARHGEF3, RAP2A, ELP2, DAB2IP, AIFM1, PTPRR, PDE4D, FGF21, MECOM, PCLO, RPTOR, ARHGEF11, RALGAPA2, MAST1, INHBE, ATP2C1, ITGB1BP1, UBC, LRRC66, PLA2G6, PPM1L, RALGPS2, UBE3A, CXXC5, PLCL1, IGF1R, DGKB, TMEM127, PPP2CB, PLCH1, OTUD7B, NFAT5, TGM2, NFATC4, CDC42EP3, GBA, TAF2, TRIO, EPGN, NEDD4, RGS3, ADGRL1, …	330	2657	16650	1.10138	1	0.961448	99.7034
GOTERM_BP_FAT	GO:0045859~regulation of protein kinase activity	18	4.01786	0.278593	RAP2B, DAB2IP, SRCIN1, PTEN, DDR2, RPTOR, SHB, IGF1R, PPM1E, DAB1, EPGN, RGS3, ITGB1BP1, UBC, SPRED2, LRRC66, INSR, GBA	330	730	16650	1.24408	1	0.963889	99.7729
GOTERM_BP_FAT	GO:0043086~negative regulation of catalytic activity	20	4.46429	0.303159	DAB2IP, SRCIN1, ANAPC4, IQGAP2, NFKB1, PTEN, ANXA2, HSPBP1, SHB, IGF1R, PPM1E, RGS3, ITGB1BP1, PSMD1, UBC, SPRED2, LRRC66, MKKS, DLG2, GBA	330	839	16650	1.20273	1	0.968315	99.881
GOTERM_BP_FAT	GO:0031401~positive regulation of protein modification process	26	5.80357	0.327044	SRCIN1, UBE3A, PAXBP1, PTEN, DDR2, DAB1, PSMD1, PDE8A, PLCB1, INSR, GBA, RAP2B, RAP2A, DAB2IP, ANAPC4, FGF21, RPTOR, ANXA2, HSPBP1, INHBE, EPGN, ITGB1BP1, UBC, CNTN1, PLA2G6, BCAR3	330	1143	16650	1.1477	1	0.970057	99.9379
GOTERM_BP_FAT	GO:0042325~regulation of phosphorylation	31	6.91964	0.341447	SRCIN1, PTEN, DDR2, SHB, IGF1R, PLCL1, DAB1, SPRED2, PDE8A, PLCB1, INSR, GBA, RAP2B, RAP2A, DAB2IP, PTPRR, PDE4D, FGF21, MECOM, RPTOR, ANXA2, PPM1E, EPGN, INHBE, RGS3, ITGB1BP1, UBC, LRRC66, CNTN1, PLA2G6, BCAR3	330	1393	16650	1.12282	1	0.973072	99.9585
GOTERM_BP_FAT	GO:0045787~positive regulation of cell cycle	9	2.00893	0.354899	SHB, RAD51B, DAB2IP, CYP1A1, EPGN, UBC, PLCB1, INSR, RPTOR	330	339	16650	1.3395	1	0.975274	99.9717
GOTERM_BP_FAT	GO:0006464~cellular protein modification process	79	17.6339	0.388566	SRCIN1, NFKB1, PTEN, DDR2, ZNRF3, LNPEP, DPY30, SHB, DAB1, PIGM, WWP1, GALNTL6, PSMD1, SPRED2, PDE8A, PLCB1, INSR, USP15, SIK3, CDK14, RAP2B, RAP2A, DAB2IP, PTPRH, ANAPC4, FUT10, PTPRR, PDE4D, FGF21, MECOM, RPTOR, PADI1, MAST1, PPM1E, INHBE, ITGB1BP1, KLHL13, UBC, FKBP14, TNNI3K, PLA2G6, CNTN1, LRRC66, PPM1L, UGGT2, EXT1, KDM6B, GCLC, FUT8, USP3, UBE3A, FN3K, PPP6R1, FPGT-TNNI3K, PAXBP1, MYCBP2, …	330	3818	16650	1.04398	1	0.98104	99.9896
GOTERM_BP_FAT	GO:0036211~protein modification process	79	17.6339	0.388566	SRCIN1, NFKB1, PTEN, DDR2, ZNRF3, LNPEP, DPY30, SHB, DAB1, PIGM, WWP1, GALNTL6, PSMD1, SPRED2, PDE8A, PLCB1, INSR, USP15, SIK3, CDK14, RAP2B, RAP2A, DAB2IP, PTPRH, ANAPC4, FUT10, PTPRR, PDE4D, FGF21, MECOM, RPTOR, PADI1, MAST1, PPM1E, INHBE, ITGB1BP1, KLHL13, UBC, FKBP14, TNNI3K, PLA2G6, CNTN1, LRRC66, PPM1L, UGGT2, EXT1, KDM6B, GCLC, FUT8, USP3, UBE3A, FN3K, PPP6R1, FPGT-TNNI3K, PAXBP1, MYCBP2, …	330	3818	16650	1.04398	1	0.98104	99.9896
GOTERM_BP_FAT	GO:0043549~regulation of kinase activity	18	4.01786	0.39183	RAP2B, DAB2IP, SRCIN1, PTEN, DDR2, RPTOR, SHB, IGF1R, PPM1E, DAB1, EPGN, RGS3, ITGB1BP1, UBC, SPRED2, LRRC66, INSR, GBA	330	788	16650	1.15251	1	0.980683	99.9906
GOTERM_BP_FAT	GO:0000165~MAPK cascade	19	4.24107	0.398359	RAP2A, DAB2IP, PTPRR, NFKB1, FGF21, MECOM, PTEN, IGF1R, EPGN, RGS3, ITGB1BP1, PSMD1, UBC, SPRED2, PPM1L, PDE8A, PLCB1, INSR, GBA	330	841	16650	1.13988	1	0.981433	99.9923
GOTERM_BP_FAT	GO:0001934~positive regulation of protein phosphorylation	20	4.46429	0.399147	RAP2B, RAP2A, DAB2IP, SRCIN1, FGF21, PTEN, DDR2, RPTOR, ANXA2, DAB1, EPGN, INHBE, ITGB1BP1, UBC, CNTN1, PLA2G6, PDE8A, PLCB1, INSR, BCAR3	330	890	16650	1.13381	1	0.981342	99.9925
GOTERM_BP_FAT	GO:0044092~negative regulation of molecular function	24	5.35714	0.421866	DAB2IP, SRCIN1, ANAPC4, LRRC1, IQGAP2, NFKB1, PTEN, ANXA2, HSPBP1, SHB, IGF1R, PPM1E, NEDD4, RGS3, ITGB1BP1, PSMD1, UBC, SPRED2, LRRC66, MKKS, NFATC4, ZNF462, DLG2, GBA	330	1100	16650	1.10083	1	0.983364	99.9963
GOTERM_BP_FAT	GO:0006796~phosphate-containing compound metabolic process	63	14.0625	0.46113	SRCIN1, NFKB1, SGMS1, DDR2, PTEN, SHB, DAB1, PIGM, PSMD1, SPRED2, PDE8A, PLCB1, IPMK, INSR, USP15, BPNT1, DLG2, CDK14, SIK3, RAP2B, NMNAT2, RAP2A, DAB2IP, PDXK, PTPRH, PTPRR, PDE4D, FGF21, MECOM, NDUFA10, RPTOR, MAST1, PPM1E, PITPNM3, INHBE, ITGB1BP1, UBC, TNNI3K, PLA2G6, CNTN1, LRRC66, INPP4B, PPM1L, FN3K, PPP6R1, FPGT-TNNI3K, PLCL1, IGF1R, GPHN, DGKB, PPP2CB, PDE1A, PLCH1, ENO2, GBA, ERG, PTPN4…	330	3083	16650	1.03102	1	0.986457	99.999
GOTERM_BP_FAT	GO:0006793~phosphorus metabolic process	63	14.0625	0.467896	SRCIN1, NFKB1, SGMS1, DDR2, PTEN, SHB, DAB1, PIGM, PSMD1, SPRED2, PDE8A, PLCB1, IPMK, INSR, USP15, BPNT1, DLG2, CDK14, SIK3, RAP2B, NMNAT2, RAP2A, DAB2IP, PDXK, PTPRH, PTPRR, PDE4D, FGF21, MECOM, NDUFA10, RPTOR, MAST1, PPM1E, PITPNM3, INHBE, ITGB1BP1, UBC, TNNI3K, PLA2G6, CNTN1, LRRC66, INPP4B, PPM1L, FN3K, PPP6R1, FPGT-TNNI3K, PLCL1, IGF1R, GPHN, DGKB, PPP2CB, PDE1A, PLCH1, ENO2, GBA, ERG, PTPN4…	330	3089	16650	1.02902	1	0.986849	99.9992
GOTERM_BP_FAT	GO:0043405~regulation of MAP kinase activity	8	1.78571	0.469292	IGF1R, DAB2IP, EPGN, RGS3, SPRED2, UBC, INSR, GBA	330	327	16650	1.23436	1	0.986706	99.9993
GOTERM_BP_FAT	GO:0023014~signal transduction by protein phosphorylation	19	4.24107	0.46938	RAP2A, DAB2IP, PTPRR, NFKB1, FGF21, MECOM, PTEN, IGF1R, EPGN, RGS3, ITGB1BP1, PSMD1, UBC, SPRED2, PPM1L, PDE8A, PLCB1, INSR, GBA	330	877	16650	1.09309	1	0.986626	99.9993
GOTERM_BP_FAT	GO:0042327~positive regulation of phosphorylation	20	4.46429	0.477404	RAP2B, RAP2A, DAB2IP, SRCIN1, FGF21, PTEN, DDR2, RPTOR, ANXA2, DAB1, EPGN, INHBE, ITGB1BP1, UBC, CNTN1, PLA2G6, PDE8A, PLCB1, INSR, BCAR3	330	932	16650	1.08272	1	0.987319	99.9994
GOTERM_BP_FAT	GO:0051174~regulation of phosphorus metabolic process	33	7.36607	0.514686	SRCIN1, PPP6R1, PTEN, DDR2, SHB, IGF1R, PLCL1, DAB1, SPRED2, PDE8A, PLCB1, INSR, DLG2, GBA, RAP2B, RAP2A, DAB2IP, PTPRR, PDE4D, FGF21, MECOM, RPTOR, ANXA2, PPM1E, EPGN, INHBE, RGS3, ITGB1BP1, UBC, LRRC66, CNTN1, PLA2G6, BCAR3	330	1611	16650	1.03352	1	0.989687	99.9999
GOTERM_BP_FAT	GO:0019220~regulation of phosphate metabolic process	33	7.36607	0.5164	SRCIN1, PPP6R1, PTEN, DDR2, SHB, IGF1R, PLCL1, DAB1, SPRED2, PDE8A, PLCB1, INSR, DLG2, GBA, RAP2B, RAP2A, DAB2IP, PTPRR, PDE4D, FGF21, MECOM, RPTOR, ANXA2, PPM1E, EPGN, INHBE, RGS3, ITGB1BP1, UBC, LRRC66, CNTN1, PLA2G6, BCAR3	330	1610	16650	1.03416	1	0.989555	99.9999
GOTERM_BP_FAT	GO:0051338~regulation of transferase activity	20	4.46429	0.523183	RAP2B, DAB2IP, SRCIN1, ANAPC4, PTEN, DDR2, RPTOR, SHB, IGF1R, PPM1E, DAB1, EPGN, RGS3, ITGB1BP1, PSMD1, UBC, SPRED2, LRRC66, INSR, GBA	330	955	16650	1.05664	1	0.990099	99.9999
GOTERM_BP_FAT	GO:0032270~positive regulation of cellular protein metabolic process	29	6.47321	0.533887	GCLC, SRCIN1, UBE3A, PAXBP1, PTEN, DDR2, DAB1, PSMD1, PDE8A, PLCB1, INSR, GBA, RAP2B, RAP2A, DAB2IP, AIFM1, ANAPC4, FGF21, RPTOR, ANXA2, HSPBP1, RNF114, EPGN, INHBE, ITGB1BP1, UBC, CNTN1, PLA2G6, BCAR3	330	1420	16650	1.03041	1	0.990839	99.9999
GOTERM_BP_FAT	GO:0000187~activation of MAPK activity	4	0.892857	0.553489	DAB2IP, EPGN, UBC, INSR	330	146	16650	1.38232	1	0.991707	100
GOTERM_BP_FAT	GO:0051247~positive regulation of protein metabolic process	30	6.69643	0.590038	GCLC, SRCIN1, UBE3A, PAXBP1, PTEN, DDR2, DAB1, PSMD1, PDE8A, PLCB1, INSR, GBA, RAP2B, RAP2A, DAB2IP, AIFM1, ANAPC4, FGF21, RPTOR, ANXA2, HSPBP1, RNF114, EPGN, NEDD4, INHBE, ITGB1BP1, UBC, CNTN1, PLA2G6, BCAR3	330	1508	16650	1.00374	1	0.993693	100
GOTERM_BP_FAT	GO:0032269~negative regulation of cellular protein metabolic process	20	4.46429	0.590051	DAB2IP, GCLC, SRCIN1, ANAPC4, PTPRR, NFKB1, PDE4D, MECOM, PTEN, ANXA2, SHB, IGF1R, PPM1E, RGS3, ITGB1BP1, PSMD1, UBC, SPRED2, LRRC66, GBA	330	992	16650	1.01723	1	0.99365	100
GOTERM_BP_FAT	GO:0045937~positive regulation of phosphate metabolic process	21	4.6875	0.59924	RAP2B, RAP2A, DAB2IP, SRCIN1, FGF21, PTEN, DDR2, RPTOR, ANXA2, DAB1, EPGN, INHBE, ITGB1BP1, UBC, CNTN1, PLA2G6, PDE8A, PLCB1, INSR, GBA, BCAR3	330	1049	16650	1.01005	1	0.99405	100
GOTERM_BP_FAT	GO:0010562~positive regulation of phosphorus metabolic process	21	4.6875	0.59924	RAP2B, RAP2A, DAB2IP, SRCIN1, FGF21, PTEN, DDR2, RPTOR, ANXA2, DAB1, EPGN, INHBE, ITGB1BP1, UBC, CNTN1, PLA2G6, PDE8A, PLCB1, INSR, GBA, BCAR3	330	1049	16650	1.01005	1	0.99405	100
GOTERM_BP_FAT	GO:0071900~regulation of protein serine/threonine kinase activity	10	2.23214	0.600768	IGF1R, DAB2IP, EPGN, RGS3, SPRED2, UBC, PTEN, INSR, RPTOR, GBA	330	476	16650	1.05997	1	0.994094	100
GOTERM_BP_FAT	GO:0065009~regulation of molecular function	55	12.2768	0.670345	SRCIN1, IQGAP2, NFKB1, DDR2, PTEN, SHB, DAB1, ARHGAP20, SLMAP, PSMD1, SPRED2, MKKS, AGAP1, PLCB1, INSR, AGAP3, DLG2, RAP2B, ARHGEF3, DAB2IP, AIFM1, ANAPC4, LRRC1, PDE4D, RPTOR, ARHGEF11, RALGAPA2, PPM1E, TRAPPC9, FNBP1L, ITGB1BP1, TBCD, UBC, PLA2G6, LRRC66, RALGPS2, PPP6R1, DENND2A, PLCL1, IGF1R, NFATC4, TBC1D1, CDC42EP3, GBA, TRIO, ADPRH, ANXA2, HSPBP1, EPGN, NEDD4, RGS3, EBF2, ZNF462, ARHGAP10,…	330	2863	16650	0.969263	1	0.996628	100
GOTERM_BP_FAT	GO:0050790~regulation of catalytic activity	45	10.0446	0.683268	RALGPS2, SRCIN1, PPP6R1, IQGAP2, NFKB1, DENND2A, DDR2, PTEN, IGF1R, SHB, DAB1, ARHGAP20, PSMD1, SPRED2, MKKS, AGAP1, TBC1D1, PLCB1, CDC42EP3, INSR, AGAP3, DLG2, GBA, RAP2B, ARHGEF3, DAB2IP, AIFM1, ANAPC4, TRIO, RPTOR, ANXA2, ARHGEF11, ADPRH, HSPBP1, RALGAPA2, PPM1E, EPGN, RGS3, FNBP1L, ITGB1BP1, TBCD, UBC, LRRC66, BCAR3, ARHGAP10	330	2357	16650	0.963282	1	0.997004	100
GOTERM_BP_FAT	GO:0051248~negative regulation of protein metabolic process	20	4.46429	0.686652	DAB2IP, GCLC, SRCIN1, ANAPC4, PTPRR, NFKB1, PDE4D, MECOM, PTEN, ANXA2, SHB, IGF1R, PPM1E, RGS3, ITGB1BP1, PSMD1, UBC, SPRED2, LRRC66, GBA	330	1049	16650	0.961955	1	0.997101	100
GOTERM_BP_FAT	GO:0032147~activation of protein kinase activity	6	1.33929	0.704705	DAB2IP, EPGN, ITGB1BP1, UBC, INSR, RPTOR	330	298	16650	1.01586	1	0.99751	100
GOTERM_BP_FAT	GO:0045860~positive regulation of protein kinase activity	9	2.00893	0.714721	DAB2IP, DAB1, SRCIN1, EPGN, ITGB1BP1, UBC, DDR2, INSR, RPTOR	330	470	16650	0.966151	1	0.99774	100
GOTERM_BP_FAT	GO:0051347~positive regulation of transferase activity	12	2.67857	0.723978	DAB2IP, DAB1, SRCIN1, EPGN, ITGB1BP1, ANAPC4, PSMD1, UBC, DDR2, PTEN, INSR, RPTOR	330	640	16650	0.946023	1	0.997869	100
GOTERM_BP_FAT	GO:1902533~positive regulation of intracellular signal transduction	17	3.79464	0.728761	DAB2IP, UBE3A, CXXC5, FGF21, PTEN, RPTOR, EPGN, NEDD4, ATP2C1, ITGB1BP1, TGM2, UBC, SPRED2, PLA2G6, PDE8A, PLCB1, INSR	330	915	16650	0.937407	1	0.997953	100
GOTERM_BP_FAT	GO:0010564~regulation of cell cycle process	11	2.45536	0.742935	RAD51B, DAB2IP, CYP1A1, EPGN, ANAPC4, PSMD1, UBC, PLCB1, PTEN, INSR, RPTOR	330	595	16650	0.932773	1	0.998293	100
GOTERM_BP_FAT	GO:0032268~regulation of cellular protein metabolic process	43	9.59821	0.779346	GCLC, SRCIN1, UBE3A, PPP6R1, NFKB1, IARS2, PAXBP1, DDR2, PTEN, PLCL1, IGF1R, SHB, DAB1, PSMD1, SPRED2, PDE8A, PLCB1, INSR, GBA, RAP2B, RAP2A, DAB2IP, AIFM1, ANAPC4, PTPRR, PDE4D, FGF21, MECOM, RPTOR, ANXA2, HSPBP1, RNF114, TRNAU1AP, PPM1E, EPGN, INHBE, RGS3, ITGB1BP1, UBC, LRRC66, CNTN1, PLA2G6, BCAR3	330	2346	16650	0.924785	1	0.998847	100
GOTERM_BP_FAT	GO:0033674~positive regulation of kinase activity	9	2.00893	0.784688	DAB2IP, DAB1, SRCIN1, EPGN, ITGB1BP1, UBC, DDR2, INSR, RPTOR	330	505	16650	0.89919	1	0.998952	100
GOTERM_BP_FAT	GO:0043406~positive regulation of MAP kinase activity	4	0.892857	0.805874	DAB2IP, EPGN, UBC, INSR	330	217	16650	0.930038	1	0.999246	100
GOTERM_BP_FAT	GO:0071902~positive regulation of protein serine/threonine kinase activity	5	1.11607	0.847378	DAB2IP, EPGN, UBC, INSR, RPTOR	330	300	16650	0.840909	1	0.999644	100
GOTERM_BP_FAT	GO:0043410~positive regulation of MAPK cascade	8	1.78571	0.847861	DAB2IP, EPGN, UBC, PDE8A, FGF21, PLCB1, PTEN, INSR	330	485	16650	0.83224	1	0.999646	100
GOTERM_BP_FAT	GO:0051246~regulation of protein metabolic process	44	9.82143	0.8676	GCLC, SRCIN1, UBE3A, PPP6R1, NFKB1, IARS2, PAXBP1, DDR2, PTEN, PLCL1, IGF1R, SHB, DAB1, PSMD1, SPRED2, PDE8A, PLCB1, INSR, GBA, RAP2B, RAP2A, DAB2IP, AIFM1, ANAPC4, PTPRR, PDE4D, FGF21, MECOM, RPTOR, ANXA2, HSPBP1, RNF114, TRNAU1AP, PPM1E, EPGN, NEDD4, INHBE, RGS3, ITGB1BP1, UBC, LRRC66, CNTN1, PLA2G6, BCAR3	330	2512	16650	0.883758	1	0.999764	100
Annotation Cluster 81	Enrichment Score: 0.4938461773704675
Category	Term	Count	%	PValue	Genes	List Total	Pop Hits	Pop Total	Fold Enrichment	Bonferroni	Benjamini	FDR
GOTERM_BP_FAT	GO:0051960~regulation of nervous system development	23	5.13393	0.0534995	DIXDC1, RAP2A, DAB2IP, EMX1, SRCIN1, MINOS1-NBL1, FZD3, PTEN, GLI1, NOTCH3, SEMA6A, SLITRK3, DAB1, NEDD4, CASZ1, CNTN1, NFATC4, UNC5D, SEMA3A, ADGRL1, BRINP3, NR2F1, KIF13B	330	769	16650	1.50904	1	0.817835	64.121
GOTERM_BP_FAT	GO:0050767~regulation of neurogenesis	20	4.46429	0.0839533	DIXDC1, RAP2A, DAB2IP, SRCIN1, EMX1, MINOS1-NBL1, FZD3, PTEN, NOTCH3, SEMA6A, DAB1, NEDD4, CASZ1, CNTN1, NFATC4, UNC5D, SEMA3A, BRINP3, KIF13B, NR2F1	330	682	16650	1.47961	1	0.859559	80.4988
GOTERM_BP_FAT	GO:0051094~positive regulation of developmental process	26	5.80357	0.245445	SOX5, GLI1, ARX, SHB, DAB1, PLS1, MKKS, SEMA3A, FBN2, BRINP3, PLCB1, INSR, AP3B1, DAB2IP, MINOS1-NBL1, LMNA, FZD3, FOXP2, CTNNA2, SEMA6A, SLITRK3, CNTN1, ZFPM2, ADGRL1, RBPJ, PHLDB2	330	1089	16650	1.20461	1	0.956509	99.4753
GOTERM_BP_FAT	GO:0050922~negative regulation of chemotaxis	3	0.669643	0.289145	SEMA6A, MINOS1-NBL1, SEMA3A	330	54	16650	2.80303	1	0.966203	99.8275
GOTERM_BP_FAT	GO:0051962~positive regulation of nervous system development	11	2.45536	0.398625	SEMA6A, DAB2IP, DAB1, SLITRK3, MINOS1-NBL1, CNTN1, FZD3, ADGRL1, SEMA3A, BRINP3, GLI1	330	449	16650	1.23608	1	0.981356	99.9924
GOTERM_BP_FAT	GO:0045597~positive regulation of cell differentiation	17	3.79464	0.59868	DAB2IP, MINOS1-NBL1, SOX5, FZD3, NFKB1, DDR2, CTNNA2, SHB, SEMA6A, DAB1, CNTN1, FBN2, SEMA3A, BRINP3, RBPJ, PLCB1, AP3B1	330	841	16650	1.01989	1	0.994045	100
GOTERM_BP_FAT	GO:0050769~positive regulation of neurogenesis	8	1.78571	0.646392	SEMA6A, DAB2IP, DAB1, MINOS1-NBL1, CNTN1, FZD3, SEMA3A, BRINP3	330	387	16650	1.04299	1	0.995958	100
GOTERM_BP_FAT	GO:0010720~positive regulation of cell development	8	1.78571	0.844921	SEMA6A, DAB2IP, DAB1, MINOS1-NBL1, CNTN1, FZD3, SEMA3A, BRINP3	330	483	16650	0.835686	1	0.999626	100
GOTERM_BP_FAT	GO:0045666~positive regulation of neuron differentiation	5	1.11607	0.864684	DAB2IP, DAB1, MINOS1-NBL1, CNTN1, BRINP3	330	310	16650	0.813783	1	0.999755	100
Annotation Cluster 82	Enrichment Score: 0.4795030399317029
Category	Term	Count	%	PValue	Genes	List Total	Pop Hits	Pop Total	Fold Enrichment	Bonferroni	Benjamini	FDR
GOTERM_BP_FAT	GO:0000271~polysaccharide biosynthetic process	4	0.892857	0.190025	UBC, NFKB1, EXT1, INSR	330	76	16650	2.6555	1	0.941392	98.0334
GOTERM_BP_FAT	GO:0016051~carbohydrate biosynthetic process	7	1.5625	0.192662	FUT8, SLC2A1, ENO2, UBC, NFKB1, EXT1, INSR	330	196	16650	1.80195	1	0.942318	98.1494
GOTERM_BP_FAT	GO:0034637~cellular carbohydrate biosynthetic process	4	0.892857	0.215468	SLC2A1, UBC, EXT1, INSR	330	81	16650	2.49158	1	0.949396	98.9153
GOTERM_BP_FAT	GO:0033692~cellular polysaccharide biosynthetic process	3	0.669643	0.382975	UBC, EXT1, INSR	330	67	16650	2.25916	1	0.980366	99.9877
GOTERM_BP_FAT	GO:0005976~polysaccharide metabolic process	4	0.892857	0.402898	UBC, NFKB1, EXT1, INSR	330	116	16650	1.73981	1	0.981547	99.9933
GOTERM_BP_FAT	GO:0044264~cellular polysaccharide metabolic process	3	0.669643	0.579895	UBC, EXT1, INSR	330	98	16650	1.54453	1	0.993188	100
GOTERM_BP_FAT	GO:0044262~cellular carbohydrate metabolic process	6	1.33929	0.623411	SLC2A1, UBC, EXT1, PTEN, INSR, SIK3	330	271	16650	1.11707	1	0.995146	100
Annotation Cluster 83	Enrichment Score: 0.4787274615389878
Category	Term	Count	%	PValue	Genes	List Total	Pop Hits	Pop Total	Fold Enrichment	Bonferroni	Benjamini	FDR
GOTERM_BP_FAT	GO:0001654~eye development	10	2.23214	0.216873	LAMB2, CRB1, CYP1A1, MYO7A, ARID1A, FBN2, NHS, FOXP2, NPHP1, BCAR3	330	334	16650	1.51062	1	0.949161	98.9509
GOTERM_BP_FAT	GO:0007423~sensory organ development	13	2.90179	0.302486	CYP1A1, MYO7A, ARID1A, FZD3, NHS, LGR5, FOXP2, LAMB2, CRB1, FBN2, RBPJ, BCAR3, NPHP1	330	507	16650	1.29371	1	0.968276	99.8788
GOTERM_BP_FAT	GO:0048592~eye morphogenesis	5	1.11607	0.322127	CRB1, MYO7A, ARID1A, FBN2, BCAR3	330	145	16650	1.73981	1	0.970391	99.9288
GOTERM_BP_FAT	GO:0043010~camera-type eye development	8	1.78571	0.345455	LAMB2, CYP1A1, ARID1A, FBN2, NHS, FOXP2, NPHP1, BCAR3	330	288	16650	1.40152	1	0.973465	99.963
GOTERM_BP_FAT	GO:0090596~sensory organ morphogenesis	6	1.33929	0.553393	CRB1, MYO7A, ARID1A, FZD3, FBN2, BCAR3	330	250	16650	1.21091	1	0.991754	100
Annotation Cluster 84	Enrichment Score: 0.4695760249116586
Category	Term	Count	%	PValue	Genes	List Total	Pop Hits	Pop Total	Fold Enrichment	Bonferroni	Benjamini	FDR
GOTERM_BP_FAT	GO:0045931~positive regulation of mitotic cell cycle	7	1.5625	0.0365763	SHB, RAD51B, CYP1A1, EPGN, PLCB1, INSR, RPTOR	330	124	16650	2.84824	1	0.781206	50.0749
GOTERM_BP_FAT	GO:1900087~positive regulation of G1/S transition of mitotic cell cycle	3	0.669643	0.0927645	CYP1A1, PLCB1, RPTOR	330	26	16650	5.82168	1	0.874783	83.7142
GOTERM_BP_FAT	GO:1901992~positive regulation of mitotic cell cycle phase transition	4	0.892857	0.106918	RAD51B, CYP1A1, PLCB1, RPTOR	330	58	16650	3.47962	1	0.883094	87.8521
GOTERM_BP_FAT	GO:1902808~positive regulation of cell cycle G1/S phase transition	3	0.669643	0.124618	CYP1A1, PLCB1, RPTOR	330	31	16650	4.8827	1	0.900085	91.6355
GOTERM_BP_FAT	GO:1901989~positive regulation of cell cycle phase transition	4	0.892857	0.137329	RAD51B, CYP1A1, PLCB1, RPTOR	330	65	16650	3.1049	1	0.910592	93.6318
GOTERM_BP_FAT	GO:0090068~positive regulation of cell cycle process	8	1.78571	0.229514	RAD51B, DAB2IP, CYP1A1, EPGN, UBC, PLCB1, INSR, RPTOR	330	251	16650	1.60811	1	0.95269	99.2255
GOTERM_BP_FAT	GO:0007346~regulation of mitotic cell cycle	13	2.90179	0.266058	SHB, RAD51B, CYP1A1, EPGN, ANAPC4, PSMD1, UBC, FZD3, BRINP3, PLCB1, PTEN, INSR, RPTOR	330	491	16650	1.33586	1	0.962196	99.6869
GOTERM_BP_FAT	GO:0051785~positive regulation of nuclear division	3	0.669643	0.303801	EPGN, PLCB1, INSR	330	56	16650	2.70292	1	0.967577	99.883
GOTERM_BP_FAT	GO:2000045~regulation of G1/S transition of mitotic cell cycle	5	1.11607	0.304268	CYP1A1, UBC, PLCB1, PTEN, RPTOR	330	141	16650	1.78917	1	0.967528	99.8844
GOTERM_BP_FAT	GO:0045787~positive regulation of cell cycle	9	2.00893	0.354899	SHB, RAD51B, DAB2IP, CYP1A1, EPGN, UBC, PLCB1, INSR, RPTOR	330	339	16650	1.3395	1	0.975274	99.9717
GOTERM_BP_FAT	GO:1902806~regulation of cell cycle G1/S phase transition	5	1.11607	0.358022	CYP1A1, UBC, PLCB1, PTEN, RPTOR	330	153	16650	1.64884	1	0.975902	99.9742
GOTERM_BP_FAT	GO:1901990~regulation of mitotic cell cycle phase transition	8	1.78571	0.419131	RAD51B, CYP1A1, ANAPC4, PSMD1, UBC, PLCB1, PTEN, RPTOR	330	312	16650	1.29371	1	0.98302	99.996
GOTERM_BP_FAT	GO:0000278~mitotic cell cycle	21	4.6875	0.459371	TAF2, RAD51B, USP3, CYP1A1, E2F6, ANAPC4, LMNA, FZD3, PTEN, RPTOR, SHB, NUMA1, EPGN, PSMD1, UBC, KLHL13, BRINP3, PLCB1, INSR, RTEL1, CDK14	330	968	16650	1.09457	1	0.986544	99.999
GOTERM_BP_FAT	GO:0000082~G1/S transition of mitotic cell cycle	6	1.33929	0.461402	CYP1A1, E2F6, UBC, PLCB1, PTEN, RPTOR	330	224	16650	1.35146	1	0.986406	99.999
GOTERM_BP_FAT	GO:0000086~G2/M transition of mitotic cell cycle	5	1.11607	0.490382	TAF2, RAD51B, UBC, PLCB1, CDK14	330	183	16650	1.37854	1	0.988066	99.9997
GOTERM_BP_FAT	GO:1901987~regulation of cell cycle phase transition	8	1.78571	0.496665	RAD51B, CYP1A1, ANAPC4, PSMD1, UBC, PLCB1, PTEN, RPTOR	330	336	16650	1.2013	1	0.988439	99.9997
GOTERM_BP_FAT	GO:0044843~cell cycle G1/S phase transition	6	1.33929	0.530564	CYP1A1, E2F6, UBC, PLCB1, PTEN, RPTOR	330	244	16650	1.24069	1	0.990562	99.9999
GOTERM_BP_FAT	GO:0044839~cell cycle G2/M phase transition	5	1.11607	0.545951	TAF2, RAD51B, UBC, PLCB1, CDK14	330	197	16650	1.28057	1	0.991448	100
GOTERM_BP_FAT	GO:0044772~mitotic cell cycle phase transition	11	2.45536	0.565135	TAF2, RAD51B, CYP1A1, E2F6, ANAPC4, PSMD1, UBC, PLCB1, PTEN, CDK14, RPTOR	330	514	16650	1.07977	1	0.992501	100
GOTERM_BP_FAT	GO:0044770~cell cycle phase transition	11	2.45536	0.64378	TAF2, RAD51B, CYP1A1, E2F6, ANAPC4, PSMD1, UBC, PLCB1, PTEN, CDK14, RPTOR	330	547	16650	1.01463	1	0.995856	100
GOTERM_BP_FAT	GO:0051726~regulation of cell cycle	19	4.24107	0.653625	RAD51B, KLLN, DAB2IP, CYP1A1, ANAPC4, FZD3, MECOM, PTEN, RPTOR, SHB, EPGN, PSMD1, MNT, UBC, BRINP3, APBB2, PLCB1, INSR, CDK14	330	976	16650	0.982209	1	0.996109	100
GOTERM_BP_FAT	GO:0022402~cell cycle process	26	5.80357	0.673397	RAD51B, E2F6, TDRD9, PTEN, ACTR3, NUMA1, PSMD1, BRINP3, PLCB1, INSR, CDK14, RTEL1, TAF2, DAB2IP, KLLN, CYP1A1, ANAPC4, LMNA, RPTOR, ARHGEF11, EPGN, ZFYVE26, UBC, KLHL13, CENPU, APBB2	330	1357	16650	0.966705	1	0.996692	100
GOTERM_BP_FAT	GO:1903047~mitotic cell cycle process	17	3.79464	0.687882	TAF2, RAD51B, CYP1A1, E2F6, ANAPC4, LMNA, PTEN, RPTOR, NUMA1, EPGN, PSMD1, UBC, KLHL13, PLCB1, INSR, RTEL1, CDK14	330	890	16650	0.963739	1	0.997137	100
GOTERM_BP_FAT	GO:0010564~regulation of cell cycle process	11	2.45536	0.742935	RAD51B, DAB2IP, CYP1A1, EPGN, ANAPC4, PSMD1, UBC, PLCB1, PTEN, INSR, RPTOR	330	595	16650	0.932773	1	0.998293	100
GOTERM_BP_FAT	GO:0007049~cell cycle	30	6.69643	0.797884	RAD51B, USP3, E2F6, TDRD9, PTEN, ACTR3, SHB, NUMA1, PSMD1, BRINP3, PLCB1, INSR, CDK14, RTEL1, TAF2, DIXDC1, KLLN, DAB2IP, CYP1A1, ANAPC4, LMNA, FZD3, RPTOR, ARHGEF11, EPGN, ZFYVE26, UBC, KLHL13, CENPU, APBB2	330	1672	16650	0.905285	1	0.99914	100
Annotation Cluster 85	Enrichment Score: 0.4568201680774638
Category	Term	Count	%	PValue	Genes	List Total	Pop Hits	Pop Total	Fold Enrichment	Bonferroni	Benjamini	FDR
GOTERM_MF_FAT	GO:0031593~polyubiquitin binding	3	0.669643	0.209374	EPS15, OTUD7B, ZRANB3	315	42	15478	3.50975	1	0.912111	97.2796
GOTERM_MF_FAT	GO:0043130~ubiquitin binding	4	0.892857	0.40846	EPS15, NEDD4, OTUD7B, ZRANB3	315	114	15478	1.72409	1	0.952846	99.9683
GOTERM_MF_FAT	GO:0032182~ubiquitin-like protein binding	4	0.892857	0.498274	EPS15, NEDD4, OTUD7B, ZRANB3	315	131	15478	1.50035	1	0.969839	99.9975
Annotation Cluster 86	Enrichment Score: 0.4555263986671036
Category	Term	Count	%	PValue	Genes	List Total	Pop Hits	Pop Total	Fold Enrichment	Bonferroni	Benjamini	FDR
GOTERM_BP_FAT	GO:0030968~endoplasmic reticulum unfolded protein response	5	1.11607	0.264577	DAB2IP, FKBP14, LMNA, FGF21, UGGT2	330	132	16650	1.91116	1	0.961703	99.6749
GOTERM_BP_FAT	GO:0034620~cellular response to unfolded protein	5	1.11607	0.277711	DAB2IP, FKBP14, LMNA, FGF21, UGGT2	330	135	16650	1.86869	1	0.964033	99.7677
GOTERM_BP_FAT	GO:0034976~response to endoplasmic reticulum stress	8	1.78571	0.283411	DAB2IP, AIFM1, PPP2CB, FKBP14, LMNA, PLA2G6, FGF21, UGGT2	330	269	16650	1.50051	1	0.965131	99.7996
GOTERM_BP_FAT	GO:0035967~cellular response to topologically incorrect protein	5	1.11607	0.340058	DAB2IP, FKBP14, LMNA, FGF21, UGGT2	330	149	16650	1.69311	1	0.973195	99.9568
GOTERM_BP_FAT	GO:0036498~IRE1-mediated unfolded protein response	3	0.669643	0.40394	DAB2IP, FKBP14, LMNA	330	70	16650	2.16234	1	0.981658	99.9935
GOTERM_BP_FAT	GO:0006986~response to unfolded protein	5	1.11607	0.442656	DAB2IP, FKBP14, LMNA, FGF21, UGGT2	330	172	16650	1.4667	1	0.985364	99.9981
GOTERM_BP_FAT	GO:0035966~response to topologically incorrect protein	5	1.11607	0.511467	DAB2IP, FKBP14, LMNA, FGF21, UGGT2	330	188	16650	1.34188	1	0.989395	99.9998
Annotation Cluster 87	Enrichment Score: 0.4524375671125864
Category	Term	Count	%	PValue	Genes	List Total	Pop Hits	Pop Total	Fold Enrichment	Bonferroni	Benjamini	FDR
GOTERM_MF_FAT	GO:0050660~flavin adenine dinucleotide binding	4	0.892857	0.215981	ACOX2, NDOR1, AIFM1, ETFA	315	79	15478	2.48792	1	0.911442	97.6083
GOTERM_MF_FAT	GO:0048037~cofactor binding	8	1.78571	0.318605	ACOX2, DDC, NDOR1, GCLC, PDXK, AIFM1, WWOX, ETFA	315	273	15478	1.4399	1	0.926698	99.7221
GOTERM_MF_FAT	GO:0050662~coenzyme binding	6	1.33929	0.322221	ACOX2, NDOR1, GCLC, AIFM1, WWOX, ETFA	315	185	15478	1.59362	1	0.927702	99.7439
GOTERM_MF_FAT	GO:0009055~electron carrier activity	3	0.669643	0.69892	ACOX2, AIFM1, ETFA	315	119	15478	1.23874	1	0.993835	100
Annotation Cluster 88	Enrichment Score: 0.45241074670884673
Category	Term	Count	%	PValue	Genes	List Total	Pop Hits	Pop Total	Fold Enrichment	Bonferroni	Benjamini	FDR
GOTERM_BP_FAT	GO:0007155~cell adhesion	39	8.70536	0.227417	SRCIN1, ASTN1, DDR2, PTEN, KIFC3, ALCAM, SHB, LAMB2, DAB1, COL6A5, TGM2, UNC5D, PLEC, AP3B1, NPHP1, KIF13B, RAP2B, ZBTB7B, HIST1H3J, DAB2IP, CNTN5, CNTNAP4, PTPRR, PCDH9, ANXA2, CTNNA2, NOTCH3, EPS15, NEDD4, ATP2C1, FNBP1L, ITGB1BP1, LSAMP, CDH18, TBCD, CNTN1, ADGRL1, PHLDB2, CDH10	330	1699	16650	1.15817	1	0.951996	99.1852
GOTERM_BP_FAT	GO:0022610~biological adhesion	39	8.70536	0.240342	SRCIN1, ASTN1, DDR2, PTEN, KIFC3, ALCAM, SHB, LAMB2, DAB1, COL6A5, TGM2, UNC5D, PLEC, AP3B1, NPHP1, KIF13B, RAP2B, ZBTB7B, HIST1H3J, DAB2IP, CNTN5, CNTNAP4, PTPRR, PCDH9, ANXA2, CTNNA2, NOTCH3, EPS15, NEDD4, ATP2C1, FNBP1L, ITGB1BP1, LSAMP, CDH18, TBCD, CNTN1, ADGRL1, PHLDB2, CDH10	330	1705	16650	1.15409	1	0.955426	99.4051
GOTERM_BP_FAT	GO:0098609~cell-cell adhesion	26	5.80357	0.367152	ASTN1, KIFC3, ALCAM, SHB, DAB1, UNC5D, PLEC, NPHP1, KIF13B, AP3B1, ZBTB7B, RAP2B, HIST1H3J, DAB2IP, PCDH9, ANXA2, CTNNA2, EPS15, NOTCH3, ATP2C1, FNBP1L, NEDD4, CDH18, ADGRL1, PHLDB2, CDH10	330	1164	16650	1.12699	1	0.978129	99.9802
GOTERM_BP_FAT	GO:0098602~single organism cell adhesion	14	3.125	0.772431	ZBTB7B, RAP2B, SHB, DAB1, SRCIN1, NEDD4, ITGB1BP1, ASTN1, CDH10, AP3B1, NPHP1, CTNNA2, KIFC3, KIF13B	330	779	16650	0.906757	1	0.998761	100
Annotation Cluster 89	Enrichment Score: 0.44871281099438165
Category	Term	Count	%	PValue	Genes	List Total	Pop Hits	Pop Total	Fold Enrichment	Bonferroni	Benjamini	FDR
GOTERM_BP_FAT	GO:0019369~arachidonic acid metabolic process	3	0.669643	0.259748	CYP1A1, FAAH, MGLL	330	50	16650	3.02727	1	0.960624	99.6328
GOTERM_BP_FAT	GO:0001676~long-chain fatty acid metabolic process	4	0.892857	0.262815	CYP1A1, FAAH, MGLL, FADS2	330	90	16650	2.24242	1	0.961045	99.6601
GOTERM_BP_FAT	GO:0033559~unsaturated fatty acid metabolic process	4	0.892857	0.397576	CYP1A1, FAAH, MGLL, FADS2	330	115	16650	1.75494	1	0.981525	99.9921
GOTERM_BP_FAT	GO:0006690~icosanoid metabolic process	3	0.669643	0.590917	CYP1A1, FAAH, MGLL	330	100	16650	1.51364	1	0.993637	100
Annotation Cluster 90	Enrichment Score: 0.4418650612296493
Category	Term	Count	%	PValue	Genes	List Total	Pop Hits	Pop Total	Fold Enrichment	Bonferroni	Benjamini	FDR
GOTERM_BP_FAT	GO:0048738~cardiac muscle tissue development	7	1.5625	0.163497	XIRP2, LMNA, ARID1A, ZFPM2, RBPJ, PTEN, KDM6B	330	186	16650	1.89883	1	0.931023	96.4139
GOTERM_BP_FAT	GO:0003007~heart morphogenesis	7	1.5625	0.303475	ERG, NEDD4, XIRP2, MKKS, ZFPM2, RBPJ, INSR	330	230	16650	1.53557	1	0.967944	99.882
GOTERM_BP_FAT	GO:0055008~cardiac muscle tissue morphogenesis	3	0.669643	0.347368	XIRP2, ZFPM2, RBPJ	330	62	16650	2.44135	1	0.973728	99.9649
GOTERM_BP_FAT	GO:0003281~ventricular septum development	3	0.669643	0.354549	XIRP2, ZFPM2, C5ORF42	330	63	16650	2.4026	1	0.975349	99.9715
GOTERM_BP_FAT	GO:0003205~cardiac chamber development	5	1.11607	0.367004	XIRP2, ARID1A, ZFPM2, C5ORF42, RBPJ	330	155	16650	1.62757	1	0.978256	99.9802
GOTERM_BP_FAT	GO:0003231~cardiac ventricle development	4	0.892857	0.413503	XIRP2, ZFPM2, C5ORF42, RBPJ	330	118	16650	1.71032	1	0.982795	99.9952
GOTERM_BP_FAT	GO:0060415~muscle tissue morphogenesis	3	0.669643	0.424559	XIRP2, ZFPM2, RBPJ	330	73	16650	2.07347	1	0.983571	99.9966
GOTERM_BP_FAT	GO:0048644~muscle organ morphogenesis	3	0.669643	0.471168	XIRP2, ZFPM2, RBPJ	330	80	16650	1.89205	1	0.986742	99.9993
GOTERM_BP_FAT	GO:0003279~cardiac septum development	3	0.669643	0.568657	XIRP2, ZFPM2, C5ORF42	330	96	16650	1.5767	1	0.992699	100
Annotation Cluster 91	Enrichment Score: 0.43507385451283864
Category	Term	Count	%	PValue	Genes	List Total	Pop Hits	Pop Total	Fold Enrichment	Bonferroni	Benjamini	FDR
GOTERM_CC_FAT	GO:0016607~nuclear speck	7	1.5625	0.212711	YLPM1, PSPC1, LMNA, MAML3, MECOM, PLCB1, RBM25	290	201	14527	1.74454	1	0.858735	96.7781
GOTERM_CC_FAT	GO:0044451~nucleoplasm part	17	3.79464	0.404901	TAF2, ELP2, E2F6, KANSL3, YLPM1, LMNA, MECOM, INTS10, PTEN, DPY30, INTS4, PSPC1, MAML3, CPSF3, PLCB1, INO80C, RBM25	290	741	14527	1.14923	1	0.917788	99.9422
GOTERM_CC_FAT	GO:0016604~nuclear body	8	1.78571	0.574964	YLPM1, PSPC1, LMNA, MAML3, MECOM, PLCB1, PTEN, RBM25	290	359	14527	1.11628	1	0.9565	99.9995
Annotation Cluster 92	Enrichment Score: 0.4334080523430437
Category	Term	Count	%	PValue	Genes	List Total	Pop Hits	Pop Total	Fold Enrichment	Bonferroni	Benjamini	FDR
GOTERM_BP_FAT	GO:0006082~organic acid metabolic process	23	5.13393	0.1814	ACOX2, NMNAT2, DDC, YARS, GCLC, CYP1A1, FA2H, FN3K, IDO2, FADS2, IARS2, DLAT, PADI1, SLC25A21, SLC1A3, FAAH, SLC2A1, ENO2, MGLL, NR5A2, LIPC, INSR, ETFA	330	907	16650	1.27944	1	0.938872	97.6041
GOTERM_BP_FAT	GO:0044283~small molecule biosynthetic process	13	2.90179	0.259691	ACOX2, SLC1A3, CYP1A1, FA2H, ENO2, MGLL, FADS2, CYP2R1, NFKB1, LIPC, IPMK, PADI1, GBA	330	488	16650	1.34408	1	0.960923	99.6322
GOTERM_BP_FAT	GO:0019752~carboxylic acid metabolic process	20	4.46429	0.282633	ACOX2, NMNAT2, DDC, YARS, GCLC, CYP1A1, FA2H, FADS2, IARS2, DLAT, SLC25A21, SLC1A3, FAAH, SLC2A1, ENO2, MGLL, NR5A2, LIPC, INSR, ETFA	330	826	16650	1.22166	1	0.965036	99.7955
GOTERM_BP_FAT	GO:0043436~oxoacid metabolic process	20	4.46429	0.291306	ACOX2, NMNAT2, DDC, YARS, GCLC, CYP1A1, FA2H, FADS2, IARS2, DLAT, SLC25A21, SLC1A3, FAAH, SLC2A1, ENO2, MGLL, NR5A2, LIPC, INSR, ETFA	330	831	16650	1.21431	1	0.966667	99.837
GOTERM_BP_FAT	GO:0016053~organic acid biosynthetic process	8	1.78571	0.312057	ACOX2, SLC1A3, CYP1A1, FA2H, MGLL, FADS2, LIPC, PADI1	330	278	16650	1.45193	1	0.968152	99.9063
GOTERM_BP_FAT	GO:0006631~fatty acid metabolic process	9	2.00893	0.425564	ACOX2, CYP1A1, FA2H, FAAH, MGLL, FADS2, DLAT, LIPC, ETFA	330	366	16650	1.24069	1	0.983541	99.9968
GOTERM_BP_FAT	GO:0072330~monocarboxylic acid biosynthetic process	5	1.11607	0.503102	ACOX2, FA2H, MGLL, FADS2, LIPC	330	186	16650	1.3563	1	0.988747	99.9998
GOTERM_BP_FAT	GO:0006633~fatty acid biosynthetic process	4	0.892857	0.548827	FA2H, MGLL, FADS2, LIPC	330	145	16650	1.39185	1	0.991477	100
GOTERM_BP_FAT	GO:0032787~monocarboxylic acid metabolic process	12	2.67857	0.548907	ACOX2, CYP1A1, FA2H, FAAH, ENO2, MGLL, FADS2, DLAT, NR5A2, LIPC, INSR, ETFA	330	559	16650	1.0831	1	0.991427	100
GOTERM_BP_FAT	GO:0046394~carboxylic acid biosynthetic process	6	1.33929	0.593559	ACOX2, SLC1A3, FA2H, MGLL, FADS2, LIPC	330	262	16650	1.15545	1	0.993823	100
Annotation Cluster 93	Enrichment Score: 0.43243830574927117
Category	Term	Count	%	PValue	Genes	List Total	Pop Hits	Pop Total	Fold Enrichment	Bonferroni	Benjamini	FDR
GOTERM_MF_FAT	GO:0004386~helicase activity	6	1.33929	0.221783	NAV2, DDX59, TDRD9, ZRANB3, RTEL1-TNFRSF6B, RTEL1	315	159	15478	1.85421	1	0.915183	97.8659
GOTERM_MF_FAT	GO:0070035~purine NTP-dependent helicase activity	4	0.892857	0.358949	DDX59, TDRD9, RTEL1-TNFRSF6B, RTEL1	315	105	15478	1.87187	1	0.937251	99.891
GOTERM_MF_FAT	GO:0008026~ATP-dependent helicase activity	4	0.892857	0.358949	DDX59, TDRD9, RTEL1-TNFRSF6B, RTEL1	315	105	15478	1.87187	1	0.937251	99.891
GOTERM_MF_FAT	GO:0042623~ATPase activity, coupled	7	1.5625	0.652008	RAD51B, ATP2C1, MYO7A, DDX59, TDRD9, RTEL1-TNFRSF6B, RTEL1	315	326	15478	1.05508	1	0.990172	100
Annotation Cluster 94	Enrichment Score: 0.42381010544685066
Category	Term	Count	%	PValue	Genes	List Total	Pop Hits	Pop Total	Fold Enrichment	Bonferroni	Benjamini	FDR
GOTERM_BP_FAT	GO:0019933~cAMP-mediated signaling	3	0.669643	0.296478	TGM2, PDE4D, PCLO	330	55	16650	2.75207	1	0.967953	99.8578
GOTERM_BP_FAT	GO:0019935~cyclic-nucleotide-mediated signaling	3	0.669643	0.368825	TGM2, PDE4D, PCLO	330	65	16650	2.32867	1	0.97844	99.9812
GOTERM_BP_FAT	GO:0019932~second-messenger-mediated signaling	6	1.33929	0.489504	NFAT5, TGM2, NFATC4, PDE4D, ADGRL1, PCLO	330	233	16650	1.29926	1	0.988015	99.9996
Annotation Cluster 95	Enrichment Score: 0.41758301448794577
Category	Term	Count	%	PValue	Genes	List Total	Pop Hits	Pop Total	Fold Enrichment	Bonferroni	Benjamini	FDR
GOTERM_BP_FAT	GO:0035148~tube formation	7	1.5625	0.0628878	DAB2IP, SHROOM3, ITGB1BP1, TGM2, ARID1A, FZD3, IPMK	330	142	16650	2.4872	1	0.841989	70.2057
GOTERM_BP_FAT	GO:0060562~epithelial tube morphogenesis	9	2.00893	0.268293	SHROOM3, MKKS, NFATC4, ARID1A, FZD3, RBPJ, IPMK, LGR5, CITED1	330	309	16650	1.46955	1	0.961194	99.7042
GOTERM_BP_FAT	GO:0001841~neural tube formation	4	0.892857	0.338381	SHROOM3, ARID1A, FZD3, IPMK	330	104	16650	1.94056	1	0.973012	99.9547
GOTERM_BP_FAT	GO:0001838~embryonic epithelial tube formation	4	0.892857	0.455268	SHROOM3, ARID1A, FZD3, IPMK	330	126	16650	1.60173	1	0.986219	99.9988
GOTERM_BP_FAT	GO:0072175~epithelial tube formation	4	0.892857	0.460404	SHROOM3, ARID1A, FZD3, IPMK	330	127	16650	1.58912	1	0.986428	99.999
GOTERM_BP_FAT	GO:0001843~neural tube closure	3	0.669643	0.527638	SHROOM3, ARID1A, FZD3	330	89	16650	1.70072	1	0.990329	99.9999
GOTERM_BP_FAT	GO:0060606~tube closure	3	0.669643	0.533657	SHROOM3, ARID1A, FZD3	330	90	16650	1.68182	1	0.990875	99.9999
GOTERM_BP_FAT	GO:0014020~primary neural tube formation	3	0.669643	0.562957	SHROOM3, ARID1A, FZD3	330	95	16650	1.5933	1	0.992384	100
GOTERM_BP_FAT	GO:0016331~morphogenesis of embryonic epithelium	4	0.892857	0.567303	SHROOM3, ARID1A, FZD3, IPMK	330	149	16650	1.35448	1	0.992667	100
GOTERM_BP_FAT	GO:0021915~neural tube development	4	0.892857	0.61986	SHROOM3, ARID1A, FZD3, IPMK	330	161	16650	1.25353	1	0.994998	100
Annotation Cluster 96	Enrichment Score: 0.4140603886874951
Category	Term	Count	%	PValue	Genes	List Total	Pop Hits	Pop Total	Fold Enrichment	Bonferroni	Benjamini	FDR
GOTERM_CC_FAT	GO:0045121~membrane raft	8	1.78571	0.312026	RAP2B, STX12, SLC2A1, CNTN1, CAPN2, MYOF, INSR, ANXA2	290	277	14527	1.44673	1	0.878855	99.5355
GOTERM_CC_FAT	GO:0098857~membrane microdomain	8	1.78571	0.316855	RAP2B, STX12, SLC2A1, CNTN1, CAPN2, MYOF, INSR, ANXA2	290	278	14527	1.44153	1	0.877811	99.5802
GOTERM_CC_FAT	GO:0098589~membrane region	9	2.00893	0.41215	EPS15, RAP2B, STX12, SLC2A1, CNTN1, CAPN2, MYOF, INSR, ANXA2	290	354	14527	1.27355	1	0.918591	99.9515
GOTERM_CC_FAT	GO:0005901~caveola	3	0.669643	0.427989	SLC2A1, MYOF, INSR	290	73	14527	2.05862	1	0.921098	99.9672
GOTERM_CC_FAT	GO:0044853~plasma membrane raft	3	0.669643	0.487706	SLC2A1, MYOF, INSR	290	82	14527	1.83267	1	0.930747	99.9933
Annotation Cluster 97	Enrichment Score: 0.4085065765145152
Category	Term	Count	%	PValue	Genes	List Total	Pop Hits	Pop Total	Fold Enrichment	Bonferroni	Benjamini	FDR
GOTERM_BP_FAT	GO:0022607~cellular component assembly	57	12.7232	0.278382	RAD51B, MYO7A, COA1, IQGAP2, SYT7, PTEN, LSR, ACTR3, HIST1H2BO, IMMP2L, ATXN10, SLC2A1, PLS1, MKKS, INSR, ATF7IP, RAP2B, RAP2A, AIFM1, TLE3, NDUFA10, PCLO, EML2, SLITRK3, PPM1E, TRAPPC9, FNBP1L, ITGB1BP1, TBCD, UBC, PPP6R1, ARPC5, C5ORF42, IGF1R, STX12, KRT8, TGM2, RPL5, TBC1D1, CDC42EP3, BCL9, GBA, PLEC, NPHP1, TAF2, HIST1H3J, BAIAP2L2, KCNB2, SYNPO2, ANXA2, CADPS, EPS15, NDOR1, TSGA10, CENPU, A…	330	2618	16650	1.09851	1	0.964077	99.7717
GOTERM_BP_FAT	GO:0043933~macromolecular complex subunit organization	53	11.8304	0.321153	RAD51B, COA1, IQGAP2, PTMA, DDR2, ACTR3, HIST1H2BO, IMMP2L, DPY30, SMARCD2, ATXN10, SLC2A1, MKKS, INSR, USP15, INO80C, ATF7IP, AIFM1, TLE3, ARID1A, MECOM, NDUFA10, PADI1, EML2, TRAPPC9, ITGB1BP1, TBCD, UBC, ADAMTS3, KDM6B, USP3, PPP6R1, PAXBP1, ARPC5, IGF1R, TGM2, RPL5, CDC42EP3, BCL9, GBA, TAF2, HIST1H3J, BAIAP2L2, KCNB2, KANSL3, ANXA2, CADPS, EPS15, KDM4C, ZNF462, CENPU, LIPC, HIST1H2AM	330	2461	16650	1.08659	1	0.970234	99.9269
GOTERM_BP_FAT	GO:0043623~cellular protein complex assembly	14	3.125	0.343398	BAIAP2L2, AIFM1, COA1, IQGAP2, ARPC5, NDUFA10, EPS15, ACTR3, CADPS, EML2, IMMP2L, TBCD, MKKS, CDC42EP3	330	575	16650	1.22846	1	0.97315	99.9607
GOTERM_BP_FAT	GO:0044085~cellular component biogenesis	61	13.6161	0.383869	RAD51B, MYO7A, COA1, IQGAP2, SYT7, PTEN, LSR, ACTR3, HIST1H2BO, IMMP2L, ATXN10, SLC2A1, PLS1, MKKS, INSR, ATF7IP, RAP2B, RAP2A, DAB2IP, AIFM1, TLE3, NDUFA10, PCLO, EML2, SLITRK3, PPM1E, TRAPPC9, FNBP1L, ITGB1BP1, TBCD, UBC, PLA2G6, PPP6R1, ARPC5, C5ORF42, IGF1R, STX12, KRT8, RPL8, TGM2, RPL5, TBC1D1, CDC42EP3, BCL9, GBA, NPHP1, PLEC, TAF2, HIST1H3J, BAIAP2L2, KCNB2, RPL26, SYNPO2, ANXA2, CADPS, E…	330	2914	16650	1.05619	1	0.980445	99.988
GOTERM_BP_FAT	GO:0071822~protein complex subunit organization	36	8.03571	0.387266	COA1, PPP6R1, IQGAP2, ARPC5, PTMA, DDR2, ACTR3, HIST1H2BO, IMMP2L, IGF1R, SMARCD2, ATXN10, SLC2A1, TGM2, MKKS, INSR, CDC42EP3, BCL9, GBA, ATF7IP, HIST1H3J, BAIAP2L2, KCNB2, AIFM1, TLE3, ARID1A, NDUFA10, ANXA2, CADPS, EML2, EPS15, TRAPPC9, ITGB1BP1, TBCD, CENPU, ADAMTS3	330	1674	16650	1.08504	1	0.980861	99.9892
GOTERM_BP_FAT	GO:0006461~protein complex assembly	31	6.91964	0.416079	COA1, PPP6R1, IQGAP2, ARPC5, ACTR3, HIST1H2BO, IMMP2L, IGF1R, ATXN10, SLC2A1, TGM2, MKKS, INSR, CDC42EP3, BCL9, GBA, ATF7IP, HIST1H3J, BAIAP2L2, AIFM1, KCNB2, TLE3, NDUFA10, ANXA2, CADPS, EML2, EPS15, TRAPPC9, ITGB1BP1, TBCD, CENPU	330	1445	16650	1.08242	1	0.982982	99.9956
GOTERM_BP_FAT	GO:0070271~protein complex biogenesis	31	6.91964	0.418148	COA1, PPP6R1, IQGAP2, ARPC5, ACTR3, HIST1H2BO, IMMP2L, IGF1R, ATXN10, SLC2A1, TGM2, MKKS, INSR, CDC42EP3, BCL9, GBA, ATF7IP, HIST1H3J, BAIAP2L2, AIFM1, KCNB2, TLE3, NDUFA10, ANXA2, CADPS, EML2, EPS15, TRAPPC9, ITGB1BP1, TBCD, CENPU	330	1446	16650	1.08167	1	0.983057	99.9959
GOTERM_BP_FAT	GO:0065003~macromolecular complex assembly	35	7.8125	0.510593	RAD51B, COA1, PPP6R1, IQGAP2, ARPC5, ACTR3, HIST1H2BO, IMMP2L, IGF1R, ATXN10, SLC2A1, TGM2, MKKS, RPL5, CDC42EP3, INSR, BCL9, GBA, ATF7IP, TAF2, HIST1H3J, BAIAP2L2, KCNB2, AIFM1, TLE3, NDUFA10, ANXA2, CADPS, EML2, EPS15, TRAPPC9, ITGB1BP1, TBCD, UBC, CENPU	330	1710	16650	1.0327	1	0.989349	99.9998
GOTERM_BP_FAT	GO:0034622~cellular macromolecular complex assembly	21	4.6875	0.519419	TAF2, HIST1H3J, RAD51B, BAIAP2L2, AIFM1, COA1, IQGAP2, ARPC5, NDUFA10, EPS15, HIST1H2BO, EML2, CADPS, ACTR3, IMMP2L, TBCD, UBC, MKKS, RPL5, CENPU, CDC42EP3	330	1004	16650	1.05532	1	0.989887	99.9999
Annotation Cluster 98	Enrichment Score: 0.4066771995788805
Category	Term	Count	%	PValue	Genes	List Total	Pop Hits	Pop Total	Fold Enrichment	Bonferroni	Benjamini	FDR
GOTERM_BP_FAT	GO:0030199~collagen fibril organization	3	0.669643	0.186889	ADAMTS3, DDR2, ANXA2	330	40	16650	3.78409	1	0.939942	97.8865
GOTERM_BP_FAT	GO:0030198~extracellular matrix organization	8	1.78571	0.490811	LAMB2, FBN2, ADAMTS3, CAPN2, APBB2, DDR2, PHLDB2, ANXA2	330	334	16650	1.20849	1	0.987879	99.9997
GOTERM_BP_FAT	GO:0043062~extracellular structure organization	8	1.78571	0.493722	LAMB2, FBN2, ADAMTS3, CAPN2, APBB2, DDR2, PHLDB2, ANXA2	330	335	16650	1.20488	1	0.988159	99.9997
GOTERM_BP_FAT	GO:0022617~extracellular matrix disassembly	3	0.669643	0.521567	FBN2, CAPN2, DDR2	330	88	16650	1.72004	1	0.990029	99.9999
Annotation Cluster 99	Enrichment Score: 0.4030643991711156
Category	Term	Count	%	PValue	Genes	List Total	Pop Hits	Pop Total	Fold Enrichment	Bonferroni	Benjamini	FDR
GOTERM_BP_FAT	GO:0060428~lung epithelium development	3	0.669643	0.194066	NUMA1, RBPJ, FOXP2	330	41	16650	3.6918	1	0.941	98.2085
GOTERM_BP_FAT	GO:0030324~lung development	5	1.11607	0.460336	NUMA1, ZFPM2, RBPJ, FOXP2, GLI1	330	176	16650	1.43337	1	0.986515	99.999
GOTERM_BP_FAT	GO:0030323~respiratory tube development	5	1.11607	0.477979	NUMA1, ZFPM2, RBPJ, FOXP2, GLI1	330	180	16650	1.40152	1	0.987232	99.9995
GOTERM_BP_FAT	GO:0060541~respiratory system development	5	1.11607	0.571886	NUMA1, ZFPM2, RBPJ, FOXP2, GLI1	330	203	16650	1.24272	1	0.992914	100
Annotation Cluster 100	Enrichment Score: 0.4008341001013304
Category	Term	Count	%	PValue	Genes	List Total	Pop Hits	Pop Total	Fold Enrichment	Bonferroni	Benjamini	FDR
GOTERM_CC_FAT	GO:0031304~intrinsic component of mitochondrial inner membrane	3	0.669643	0.112817	MINOS1, MINOS1-NBL1, COA1	290	29	14527	5.18205	1	0.769929	82.0824
GOTERM_CC_FAT	GO:0031305~integral component of mitochondrial inner membrane	3	0.669643	0.112817	MINOS1, MINOS1-NBL1, COA1	290	29	14527	5.18205	1	0.769929	82.0824
GOTERM_CC_FAT	GO:0032592~integral component of mitochondrial membrane	3	0.669643	0.313948	MINOS1, MINOS1-NBL1, COA1	290	57	14527	2.63648	1	0.877835	99.5538
GOTERM_CC_FAT	GO:0098573~intrinsic component of mitochondrial membrane	3	0.669643	0.321286	MINOS1, MINOS1-NBL1, COA1	290	58	14527	2.59102	1	0.879286	99.6177
GOTERM_CC_FAT	GO:0044455~mitochondrial membrane part	5	1.11607	0.573518	MINOS1, IMMP2L, MINOS1-NBL1, COA1, NDUFA10	290	202	14527	1.23993	1	0.956978	99.9995
GOTERM_CC_FAT	GO:0031301~integral component of organelle membrane	4	0.892857	0.628792	MINOS1, MINOS1-NBL1, COA1, SGMS1	290	162	14527	1.23687	1	0.965115	99.9999
GOTERM_CC_FAT	GO:0031300~intrinsic component of organelle membrane	4	0.892857	0.657122	MINOS1, MINOS1-NBL1, COA1, SGMS1	290	169	14527	1.18564	1	0.971991	100
GOTERM_CC_FAT	GO:0005743~mitochondrial inner membrane	8	1.78571	0.872139	MINOS1, SLC25A21, IMMP2L, MINOS1-NBL1, AIFM1, DNAJC11, COA1, NDUFA10	290	499	14527	0.803096	1	0.996673	100
GOTERM_CC_FAT	GO:0019866~organelle inner membrane	8	1.78571	0.930481	MINOS1, SLC25A21, IMMP2L, MINOS1-NBL1, AIFM1, DNAJC11, COA1, NDUFA10	290	557	14527	0.71947	1	0.999218	100
Annotation Cluster 101	Enrichment Score: 0.39320736766652536
Category	Term	Count	%	PValue	Genes	List Total	Pop Hits	Pop Total	Fold Enrichment	Bonferroni	Benjamini	FDR
GOTERM_BP_FAT	GO:0061337~cardiac conduction	5	1.11607	0.12573	KCNJ4, FPGT-TNNI3K, TNNI3K, PDE4D, KCNIP4	330	97	16650	2.60075	1	0.901303	91.8314
GOTERM_BP_FAT	GO:0035637~multicellular organismal signaling	6	1.33929	0.16963	KCNJ4, FPGT-TNNI3K, TNNI3K, PDE4D, KCNIP4, GBA	330	148	16650	2.04545	1	0.935073	96.8736
GOTERM_BP_FAT	GO:0008015~blood circulation	14	3.125	0.203315	LNPEP, KCNJ4, IMMP2L, GCLC, NAV2, ITGB1BP1, FPGT-TNNI3K, TNNI3K, MKKS, PLA2G6, PDE4D, SEMA3A, MYOF, KCNIP4	330	506	16650	1.39598	1	0.94539	98.5553
GOTERM_BP_FAT	GO:0003013~circulatory system process	14	3.125	0.209026	LNPEP, KCNJ4, IMMP2L, GCLC, NAV2, ITGB1BP1, FPGT-TNNI3K, TNNI3K, MKKS, PLA2G6, PDE4D, SEMA3A, MYOF, KCNIP4	330	510	16650	1.38503	1	0.947383	98.7367
GOTERM_BP_FAT	GO:0002027~regulation of heart rate	4	0.892857	0.273524	FPGT-TNNI3K, TNNI3K, PDE4D, SEMA3A	330	92	16650	2.19368	1	0.963073	99.7413
GOTERM_BP_FAT	GO:0006936~muscle contraction	9	2.00893	0.324448	KCNB2, SLMAP, FPGT-TNNI3K, TNNI3K, MKKS, PLA2G6, PDE4D, MYOF, ARHGEF11	330	331	16650	1.37188	1	0.969709	99.9332
GOTERM_BP_FAT	GO:1903779~regulation of cardiac conduction	3	0.669643	0.396988	FPGT-TNNI3K, TNNI3K, PDE4D	330	69	16650	2.19368	1	0.981525	99.992
GOTERM_BP_FAT	GO:0055117~regulation of cardiac muscle contraction	3	0.669643	0.431351	FPGT-TNNI3K, TNNI3K, PDE4D	330	74	16650	2.04545	1	0.984384	99.9973
GOTERM_BP_FAT	GO:0008016~regulation of heart contraction	6	1.33929	0.489504	KCNJ4, FPGT-TNNI3K, TNNI3K, PDE4D, SEMA3A, KCNIP4	330	233	16650	1.29926	1	0.988015	99.9996
GOTERM_BP_FAT	GO:0006942~regulation of striated muscle contraction	3	0.669643	0.515444	FPGT-TNNI3K, TNNI3K, PDE4D	330	87	16650	1.73981	1	0.989644	99.9999
GOTERM_BP_FAT	GO:0060047~heart contraction	6	1.33929	0.534083	KCNJ4, FPGT-TNNI3K, TNNI3K, PDE4D, SEMA3A, KCNIP4	330	245	16650	1.23562	1	0.990798	99.9999
GOTERM_BP_FAT	GO:0044057~regulation of system process	11	2.45536	0.539959	KCNJ4, KCNB2, FPGT-TNNI3K, TNNI3K, PLA2G6, MGLL, PDE4D, SEMA3A, PTEN, KCNIP4, GBA	330	504	16650	1.10119	1	0.99112	99.9999
GOTERM_BP_FAT	GO:0003015~heart process	6	1.33929	0.54503	KCNJ4, FPGT-TNNI3K, TNNI3K, PDE4D, SEMA3A, KCNIP4	330	248	16650	1.22067	1	0.991463	100
GOTERM_BP_FAT	GO:1903522~regulation of blood circulation	7	1.5625	0.545667	KCNJ4, FPGT-TNNI3K, TNNI3K, PLA2G6, PDE4D, SEMA3A, KCNIP4	330	300	16650	1.17727	1	0.991475	100
GOTERM_BP_FAT	GO:0003012~muscle system process	9	2.00893	0.550523	KCNB2, SLMAP, FPGT-TNNI3K, TNNI3K, MKKS, PLA2G6, PDE4D, MYOF, ARHGEF11	330	405	16650	1.12121	1	0.991551	100
GOTERM_BP_FAT	GO:0006937~regulation of muscle contraction	4	0.892857	0.576365	KCNB2, FPGT-TNNI3K, TNNI3K, PDE4D	330	151	16650	1.33654	1	0.993096	100
GOTERM_BP_FAT	GO:0006941~striated muscle contraction	4	0.892857	0.61986	FPGT-TNNI3K, TNNI3K, PDE4D, ARHGEF11	330	161	16650	1.25353	1	0.994998	100
GOTERM_BP_FAT	GO:0090257~regulation of muscle system process	4	0.892857	0.753439	KCNB2, FPGT-TNNI3K, TNNI3K, PDE4D	330	198	16650	1.01928	1	0.998455	100
GOTERM_BP_FAT	GO:0003008~system process	37	8.25893	0.765476	CAMTA1, GCLC, MYO7A, FPGT-TNNI3K, PTEN, KCNIP4, KIFC3, LNPEP, IMMP2L, SLC1A3, LAMB2, PDE1C, SLMAP, NFAT5, PLS1, MKKS, MGLL, SEMA3A, PLCB1, MYOF, DLG2, GBA, NPHP1, CNTN5, KCNB2, PDE4D, CTNNA2, ARHGEF11, FOXP2, GRM5, EML2, KCNJ4, EYS, NAV2, ITGB1BP1, TNNI3K, PLA2G6	330	2014	16650	0.926921	1	0.99867	100
Annotation Cluster 102	Enrichment Score: 0.3822394031196363
Category	Term	Count	%	PValue	Genes	List Total	Pop Hits	Pop Total	Fold Enrichment	Bonferroni	Benjamini	FDR
GOTERM_BP_FAT	GO:0046685~response to arsenic-containing substance	3	0.669643	0.0989262	GCLC, CYP1A1, PTEN	330	27	16650	5.60606	1	0.871646	85.6572
GOTERM_BP_FAT	GO:0007568~aging	7	1.5625	0.478196	DDC, GCLC, CYP1A1, LMNA, MNT, PDE4D, PTEN	330	280	16650	1.26136	1	0.987086	99.9995
GOTERM_BP_FAT	GO:0010038~response to metal ion	6	1.33929	0.73152	GCLC, CYP1A1, NEDD4, CYP2R1, NFATC4, PTEN	330	308	16650	0.982881	1	0.998022	100
GOTERM_BP_FAT	GO:0007584~response to nutrient	3	0.669643	0.854867	GCLC, CYP1A1, PTEN	330	171	16650	0.885167	1	0.999698	100
Annotation Cluster 103	Enrichment Score: 0.3809411867704954
Category	Term	Count	%	PValue	Genes	List Total	Pop Hits	Pop Total	Fold Enrichment	Bonferroni	Benjamini	FDR
GOTERM_BP_FAT	GO:0048608~reproductive structure development	11	2.45536	0.314816	IMMP2L, UBE3A, KRT8, MKKS, ARID1A, ZFPM2, SEMA3A, RBPJ, PTEN, INSR, CITED1	330	418	16650	1.32775	1	0.96883	99.9131
GOTERM_BP_FAT	GO:0061458~reproductive system development	11	2.45536	0.327473	IMMP2L, UBE3A, KRT8, MKKS, ARID1A, ZFPM2, SEMA3A, RBPJ, PTEN, INSR, CITED1	330	423	16650	1.31206	1	0.97	99.9386
GOTERM_BP_FAT	GO:0048568~embryonic organ development	10	2.23214	0.442253	MYO7A, KRT8, MKKS, ARID1A, FZD3, ZFPM2, FBN2, RBPJ, CITED1, GLI1	330	417	16650	1.20994	1	0.985505	99.9981
GOTERM_BP_FAT	GO:0003006~developmental process involved in reproduction	14	3.125	0.497686	UBE3A, ARID1A, PTEN, LGR5, CITED1, SHB, IMMP2L, KRT8, MKKS, ZFPM2, SEMA3A, RBPJ, INSR, NPHP1	330	636	16650	1.11063	1	0.988428	99.9997
GOTERM_BP_FAT	GO:0001890~placenta development	4	0.892857	0.548827	KRT8, ARID1A, RBPJ, CITED1	330	145	16650	1.39185	1	0.991477	100
Annotation Cluster 104	Enrichment Score: 0.3725525731635561
Category	Term	Count	%	PValue	Genes	List Total	Pop Hits	Pop Total	Fold Enrichment	Bonferroni	Benjamini	FDR
GOTERM_CC_FAT	GO:0030118~clathrin coat	3	0.669643	0.247439	EPS15, BAIAP2L2, AP3B1	290	48	14527	3.13082	1	0.863847	98.3147
GOTERM_CC_FAT	GO:0030117~membrane coat	3	0.669643	0.555184	EPS15, BAIAP2L2, AP3B1	290	93	14527	1.61591	1	0.953097	99.9991
GOTERM_CC_FAT	GO:0048475~coated membrane	3	0.669643	0.555184	EPS15, BAIAP2L2, AP3B1	290	93	14527	1.61591	1	0.953097	99.9991
Annotation Cluster 105	Enrichment Score: 0.3719532436094116
Category	Term	Count	%	PValue	Genes	List Total	Pop Hits	Pop Total	Fold Enrichment	Bonferroni	Benjamini	FDR
GOTERM_BP_FAT	GO:0007626~locomotory behavior	7	1.5625	0.180969	GRM5, SLC4A10, DAB1, NAV2, LSAMP, ASTN1, PTEN	330	192	16650	1.83949	1	0.939581	97.5805
GOTERM_BP_FAT	GO:0007610~behavior	14	3.125	0.308781	CNTNAP4, ASTN1, PTEN, FOXP2, GRM5, SLC4A10, DAB1, SLC1A3, NAV2, LSAMP, MKKS, PLA2G6, PLCB1, NPHP1	330	557	16650	1.26816	1	0.968727	99.8977
GOTERM_BP_FAT	GO:0044708~single-organism behavior	10	2.23214	0.388902	GRM5, SLC4A10, SLC1A3, DAB1, LSAMP, PLA2G6, PLCB1, PTEN, FOXP2, NPHP1	330	395	16650	1.27733	1	0.98083	99.9897
GOTERM_BP_FAT	GO:0007613~memory	3	0.669643	0.574303	PLA2G6, PLCB1, PTEN	330	97	16650	1.56045	1	0.993047	100
GOTERM_BP_FAT	GO:0007611~learning or memory	5	1.11607	0.635226	GRM5, PLA2G6, PLCB1, PTEN, FOXP2	330	220	16650	1.14669	1	0.995523	100
GOTERM_BP_FAT	GO:0050890~cognition	5	1.11607	0.739803	GRM5, PLA2G6, PLCB1, PTEN, FOXP2	330	253	16650	0.997125	1	0.998232	100
Annotation Cluster 106	Enrichment Score: 0.36712023549699196
Category	Term	Count	%	PValue	Genes	List Total	Pop Hits	Pop Total	Fold Enrichment	Bonferroni	Benjamini	FDR
GOTERM_BP_FAT	GO:0032886~regulation of microtubule-based process	6	1.33929	0.156808	EML2, DIXDC1, TBCD, MKKS, PHLDB2, MEMO1	330	144	16650	2.10227	1	0.9273	95.8399
GOTERM_BP_FAT	GO:0032272~negative regulation of protein polymerization	3	0.669643	0.347368	EML2, TBCD, MKKS	330	62	16650	2.44135	1	0.973728	99.9649
GOTERM_BP_FAT	GO:0031333~negative regulation of protein complex assembly	4	0.892857	0.402898	EML2, TBCD, MKKS, GBA	330	116	16650	1.73981	1	0.981547	99.9933
GOTERM_BP_FAT	GO:0051494~negative regulation of cytoskeleton organization	4	0.892857	0.418783	EML2, TBCD, MKKS, PHLDB2	330	119	16650	1.69595	1	0.98307	99.996
GOTERM_BP_FAT	GO:0070507~regulation of microtubule cytoskeleton organization	4	0.892857	0.424048	EML2, DIXDC1, TBCD, PHLDB2	330	120	16650	1.68182	1	0.983585	99.9966
GOTERM_BP_FAT	GO:0010639~negative regulation of organelle organization	6	1.33929	0.744251	EML2, TBCD, LMNA, MKKS, PHLDB2, RTEL1	330	313	16650	0.96718	1	0.998297	100
GOTERM_BP_FAT	GO:0000226~microtubule cytoskeleton organization	6	1.33929	0.928283	EML2, NUMA1, TBCD, LMNA, ARPC5, PHLDB2	330	428	16650	0.707307	1	0.999965	100
Annotation Cluster 107	Enrichment Score: 0.36039309495386207
Category	Term	Count	%	PValue	Genes	List Total	Pop Hits	Pop Total	Fold Enrichment	Bonferroni	Benjamini	FDR
GOTERM_BP_FAT	GO:0043200~response to amino acid	4	0.892857	0.295067	GCLC, FGF21, CAPN2, RPTOR	330	96	16650	2.10227	1	0.967848	99.8524
GOTERM_BP_FAT	GO:0071230~cellular response to amino acid stimulus	3	0.669643	0.296478	GCLC, CAPN2, RPTOR	330	55	16650	2.75207	1	0.967953	99.8578
GOTERM_BP_FAT	GO:0071229~cellular response to acid chemical	4	0.892857	0.640441	GCLC, BRINP3, CAPN2, RPTOR	330	166	16650	1.21577	1	0.995796	100
GOTERM_BP_FAT	GO:0001101~response to acid chemical	6	1.33929	0.645706	GCLC, KRT8, FGF21, BRINP3, CAPN2, RPTOR	330	278	16650	1.08895	1	0.995945	100
Annotation Cluster 108	Enrichment Score: 0.35265523877198274
Category	Term	Count	%	PValue	Genes	List Total	Pop Hits	Pop Total	Fold Enrichment	Bonferroni	Benjamini	FDR
GOTERM_BP_FAT	GO:0009611~response to wounding	19	4.24107	0.0939774	RAP2B, HIST1H3J, RAD51B, CYP1A1, CPQ, FUT10, SYT7, PTEN, ANXA2, GLI1, LAMB2, SLC1A3, DGKB, EYS, ZFPM2, MYOF, PHLDB2, BCL9, AP3B1	330	649	16650	1.4771	1	0.874321	84.1154
GOTERM_BP_FAT	GO:0042060~wound healing	14	3.125	0.272533	RAP2B, HIST1H3J, RAD51B, CPQ, FUT10, SYT7, ANXA2, DGKB, EYS, ZFPM2, PHLDB2, MYOF, BCL9, AP3B1	330	542	16650	1.30325	1	0.963164	99.7346
GOTERM_BP_FAT	GO:0007596~blood coagulation	7	1.5625	0.67218	RAP2B, HIST1H3J, RAD51B, DGKB, ZFPM2, ANXA2, AP3B1	330	342	16650	1.0327	1	0.996676	100
GOTERM_BP_FAT	GO:0050817~coagulation	7	1.5625	0.714041	RAP2B, HIST1H3J, RAD51B, DGKB, ZFPM2, ANXA2, AP3B1	330	358	16650	0.986541	1	0.997763	100
GOTERM_BP_FAT	GO:0007599~hemostasis	7	1.5625	0.714041	RAP2B, HIST1H3J, RAD51B, DGKB, ZFPM2, ANXA2, AP3B1	330	358	16650	0.986541	1	0.997763	100
GOTERM_BP_FAT	GO:0050878~regulation of body fluid levels	8	1.78571	0.872357	RAP2B, HIST1H3J, RAD51B, DGKB, ZFPM2, ANXA2, GBA, AP3B1	330	503	16650	0.802458	1	0.999785	100
Annotation Cluster 109	Enrichment Score: 0.3522364701493925
Category	Term	Count	%	PValue	Genes	List Total	Pop Hits	Pop Total	Fold Enrichment	Bonferroni	Benjamini	FDR
GOTERM_BP_FAT	GO:0061024~membrane organization	28	6.25	0.0800713	SYT5, PPP6R1, SYT7, PTEN, KCNIP4, LNPEP, GPHN, STX12, CRB1, SLMAP, RPL8, PLS1, RPL5, TBC1D1, MYOF, DLG2, STX6, RAP2A, BAIAP2L2, KCNB2, FA2H, LMNA, RPL26, ANXA2, TRAPPC9, FNBP1L, ITGB1BP1, SYTL1	330	1027	16650	1.37559	1	0.861333	78.8993
GOTERM_BP_FAT	GO:0044802~single-organism membrane organization	24	5.35714	0.0927266	STX6, RAP2A, BAIAP2L2, SYT5, KCNB2, FA2H, RPL26, LMNA, SYT7, PTEN, KCNIP4, ANXA2, GPHN, STX12, CRB1, FNBP1L, ITGB1BP1, SLMAP, RPL8, PLS1, RPL5, MYOF, SYTL1, DLG2	330	866	16650	1.39828	1	0.87602	83.7016
GOTERM_BP_FAT	GO:1902580~single-organism cellular localization	27	6.02679	0.195494	SYT5, MYO7A, SYT7, KCNIP4, ACTR3, GPHN, NUMA1, SLMAP, RPL8, PLS1, MKKS, RPL5, DLG2, AP3B1, RAP2A, DAB2IP, KCNB2, LMNA, RPL26, PCLO, ANXA2, CADPS, PLEKHA8, FNBP1L, ITGB1BP1, ADGRL1, SYTL1	330	1102	16650	1.23618	1	0.941832	98.2668
GOTERM_BP_FAT	GO:0051641~cellular localization	57	12.7232	0.204688	LEPROTL1, SYT5, MYO7A, SYT7, PTEN, KCNIP4, CITED1, CCDC141, ACTR3, IMMP2L, DAB1, SLMAP, PLS1, MKKS, DLG2, KIF13B, AP3B1, STX6, DDC, RAP2A, DAB2IP, FUT10, PDE4D, KIF16B, PCLO, TRAPPC9, FNBP1L, ITGB1BP1, UBC, PLA2G6, CPSF3, SNX16, PPP6R1, DENND2A, ASTN2, C5ORF42, NUMA1, GPHN, STX12, CRB1, RPL8, SYN2, OTUD7B, RPL5, TBC1D1, KCNB2, RPL26, LMNA, ADPRH, ANXA2, CADPS, EPS15, SEMA6A, PLEKHA8, NEDD4, ADGRL…	330	2541	16650	1.1318	1	0.945608	98.6011
GOTERM_BP_FAT	GO:0051649~establishment of localization in cell	44	9.82143	0.304292	SYT5, MYO7A, SNX16, PPP6R1, DENND2A, SYT7, PTEN, CITED1, ACTR3, IMMP2L, NUMA1, STX12, CRB1, SYN2, RPL8, MKKS, RPL5, TBC1D1, AP3B1, KIF13B, STX6, DDC, DAB2IP, KCNB2, FUT10, RPL26, LMNA, PDE4D, KIF16B, PCLO, ANXA2, ADPRH, CADPS, EPS15, TRAPPC9, PLEKHA8, NEDD4, FNBP1L, ITGB1BP1, UBC, PLA2G6, ADGRL1, CPSF3, SYTL1	330	2004	16650	1.10778	1	0.967283	99.8845
GOTERM_BP_FAT	GO:0072657~protein localization to membrane	12	2.67857	0.373693	RAP2A, GPHN, KCNB2, ITGB1BP1, SLMAP, RPL8, PLS1, RPL26, RPL5, DLG2, KCNIP4, ANXA2	330	489	16650	1.23815	1	0.979145	99.9837
GOTERM_BP_FAT	GO:0046907~intracellular transport	33	7.36607	0.481774	MYO7A, SNX16, PPP6R1, DENND2A, SYT7, CITED1, IMMP2L, STX12, CRB1, RPL8, MKKS, RPL5, TBC1D1, KIF13B, AP3B1, STX6, DAB2IP, KCNB2, FUT10, RPL26, LMNA, KIF16B, ANXA2, ADPRH, EPS15, PLEKHA8, TRAPPC9, NEDD4, FNBP1L, ITGB1BP1, UBC, CPSF3, SYTL1	330	1594	16650	1.04454	1	0.987312	99.9995
GOTERM_BP_FAT	GO:0006886~intracellular protein transport	21	4.6875	0.547682	STX6, DAB2IP, KCNB2, MYO7A, FUT10, SNX16, RPL26, LMNA, ANXA2, ADPRH, IMMP2L, STX12, CRB1, NEDD4, ITGB1BP1, RPL8, RPL5, TBC1D1, SYTL1, AP3B1, KIF13B	330	1020	16650	1.03877	1	0.991466	100
GOTERM_BP_FAT	GO:0008104~protein localization	48	10.7143	0.60946	LEPROTL1, SHROOM3, SRCIN1, MYO7A, SNX16, DENND2A, ASTN2, SYT7, C5ORF42, KCNIP4, IMMP2L, GPHN, STX12, CRB1, SLMAP, RPL8, SLC2A1, OTUD7B, PLS1, RPL5, FBN2, AGAP1, TBC1D1, DLG2, AP3B1, KIF13B, SCAMP1, STX6, RAP2A, DAB2IP, KCNB2, MINOS1-NBL1, FUT10, RPL26, LMNA, PCLO, ANXA2, ADPRH, CADPS, EPS15, PLEKHA8, NEDD4, ITGB1BP1, PLA2G6, MCC, RBPJ, SYTL1, PHLDB2	330	2448	16650	0.989305	1	0.994551	100
GOTERM_BP_FAT	GO:0006605~protein targeting	14	3.125	0.632653	DAB2IP, KCNB2, SNX16, FUT10, LMNA, RPL26, ANXA2, IMMP2L, NEDD4, ITGB1BP1, RPL8, RPL5, KIF13B, AP3B1	330	701	16650	1.00765	1	0.99548	100
GOTERM_BP_FAT	GO:0034613~cellular protein localization	31	6.91964	0.647597	LEPROTL1, MYO7A, SNX16, ASTN2, C5ORF42, KCNIP4, IMMP2L, GPHN, STX12, CRB1, SLMAP, RPL8, PLS1, OTUD7B, RPL5, TBC1D1, DLG2, KIF13B, AP3B1, STX6, RAP2A, DAB2IP, KCNB2, FUT10, LMNA, RPL26, ANXA2, ADPRH, NEDD4, ITGB1BP1, SYTL1	330	1600	16650	0.977557	1	0.996002	100
GOTERM_BP_FAT	GO:0070727~cellular macromolecule localization	31	6.91964	0.665252	LEPROTL1, MYO7A, SNX16, ASTN2, C5ORF42, KCNIP4, IMMP2L, GPHN, STX12, CRB1, SLMAP, RPL8, PLS1, OTUD7B, RPL5, TBC1D1, DLG2, KIF13B, AP3B1, STX6, RAP2A, DAB2IP, KCNB2, FUT10, LMNA, RPL26, ANXA2, ADPRH, NEDD4, ITGB1BP1, SYTL1	330	1613	16650	0.969678	1	0.996503	100
GOTERM_BP_FAT	GO:0045184~establishment of protein localization	38	8.48214	0.71628	SRCIN1, MYO7A, SNX16, DENND2A, ASTN2, SYT7, IMMP2L, STX12, CRB1, SLC2A1, RPL8, PLS1, RPL5, AGAP1, TBC1D1, AP3B1, KIF13B, STX6, SCAMP1, RAP2A, DAB2IP, KCNB2, FUT10, RPL26, LMNA, PCLO, ANXA2, ADPRH, CADPS, EPS15, PLEKHA8, NEDD4, ITGB1BP1, PLA2G6, MCC, RBPJ, SYTL1, PHLDB2	330	2021	16650	0.948675	1	0.997719	100
GOTERM_BP_FAT	GO:0033036~macromolecule localization	53	11.8304	0.728565	LEPROTL1, SRCIN1, MYO7A, NFKB1, SYT7, KCNIP4, IMMP2L, SLMAP, SLC2A1, PLS1, AGAP1, DLG2, AP3B1, KIF13B, SCAMP1, STX6, RAP2A, DAB2IP, MINOS1-NBL1, FUT10, PCLO, PITPNM3, ITGB1BP1, PLA2G6, MCC, CPSF3, SHROOM3, SNX16, DENND2A, ASTN2, C5ORF42, GPHN, STX12, CRB1, RPL8, OTUD7B, RPL5, FBN2, SLCO3A1, TBC1D1, KCNB2, RPL26, LMNA, ADPRH, ANXA2, EPS15, CADPS, PLEKHA8, NEDD4, RBPJ, LIPC, PHLDB2, SYTL1	330	2817	16650	0.949269	1	0.997961	100
GOTERM_BP_FAT	GO:0015031~protein transport	34	7.58929	0.771035	SRCIN1, MYO7A, SNX16, DENND2A, ASTN2, SYT7, IMMP2L, STX12, CRB1, SLC2A1, RPL8, RPL5, AGAP1, TBC1D1, KIF13B, AP3B1, STX6, SCAMP1, DAB2IP, KCNB2, FUT10, RPL26, LMNA, PCLO, ANXA2, ADPRH, EPS15, CADPS, PLEKHA8, NEDD4, ITGB1BP1, PLA2G6, RBPJ, SYTL1	330	1860	16650	0.922287	1	0.998744	100
GOTERM_BP_FAT	GO:1902582~single-organism intracellular transport	12	2.67857	0.814251	DAB2IP, PLEKHA8, FNBP1L, KCNB2, ITGB1BP1, RPL8, RPL26, LMNA, RPL5, SYT7, ANXA2, AP3B1	330	695	16650	0.871158	1	0.999339	100
GOTERM_BP_FAT	GO:0072594~establishment of protein localization to organelle	9	2.00893	0.955058	IMMP2L, DAB2IP, NEDD4, SNX16, RPL8, RPL26, LMNA, RPL5, AP3B1	330	666	16650	0.681818	1	0.999992	100
GOTERM_BP_FAT	GO:0033365~protein localization to organelle	11	2.45536	0.985925	IMMP2L, DAB2IP, NEDD4, SNX16, RPL8, RPL26, OTUD7B, LMNA, RPL5, C5ORF42, AP3B1	330	902	16650	0.615299	1	1	100
Annotation Cluster 110	Enrichment Score: 0.3491823074029407
Category	Term	Count	%	PValue	Genes	List Total	Pop Hits	Pop Total	Fold Enrichment	Bonferroni	Benjamini	FDR
GOTERM_MF_FAT	GO:0020037~heme binding	5	1.11607	0.302705	CYP1A1, FA2H, PGRMC2, IDO2, CYP2R1	315	137	15478	1.7933	1	0.931817	99.6041
GOTERM_MF_FAT	GO:0046906~tetrapyrrole binding	5	1.11607	0.344068	CYP1A1, FA2H, PGRMC2, IDO2, CYP2R1	315	146	15478	1.68276	1	0.933492	99.8451
GOTERM_MF_FAT	GO:0005506~iron ion binding	3	0.669643	0.860575	CYP1A1, FA2H, CYP2R1	315	169	15478	0.872246	1	0.999097	100
Annotation Cluster 111	Enrichment Score: 0.3472613670070079
Category	Term	Count	%	PValue	Genes	List Total	Pop Hits	Pop Total	Fold Enrichment	Bonferroni	Benjamini	FDR
GOTERM_BP_FAT	GO:2000243~positive regulation of reproductive process	4	0.892857	0.0655724	ZFPM2, SEMA3A, PLCB1, INSR	330	47	16650	4.294	1	0.848556	71.7573
GOTERM_BP_FAT	GO:2000241~regulation of reproductive process	5	1.11607	0.238696	SHB, ZFPM2, SEMA3A, PLCB1, INSR	330	126	16650	2.00216	1	0.955478	99.3806
GOTERM_BP_FAT	GO:0008406~gonad development	6	1.33929	0.412754	IMMP2L, UBE3A, MKKS, ZFPM2, SEMA3A, INSR	330	213	16650	1.42125	1	0.982886	99.9951
GOTERM_BP_FAT	GO:0045137~development of primary sexual characteristics	6	1.33929	0.432385	IMMP2L, UBE3A, MKKS, ZFPM2, SEMA3A, INSR	330	218	16650	1.38866	1	0.984361	99.9974
GOTERM_BP_FAT	GO:0008585~female gonad development	3	0.669643	0.533657	IMMP2L, UBE3A, ZFPM2	330	90	16650	1.68182	1	0.990875	99.9999
GOTERM_BP_FAT	GO:0046545~development of primary female sexual characteristics	3	0.669643	0.557204	IMMP2L, UBE3A, ZFPM2	330	94	16650	1.61025	1	0.991998	100
GOTERM_BP_FAT	GO:0007548~sex differentiation	6	1.33929	0.616891	IMMP2L, UBE3A, MKKS, ZFPM2, SEMA3A, INSR	330	269	16650	1.12538	1	0.994852	100
GOTERM_BP_FAT	GO:0046660~female sex differentiation	3	0.669643	0.632846	IMMP2L, UBE3A, ZFPM2	330	108	16650	1.40152	1	0.995461	100
GOTERM_BP_FAT	GO:0046546~development of primary male sexual characteristics	3	0.669643	0.753361	ZFPM2, SEMA3A, INSR	330	136	16650	1.11297	1	0.998464	100
GOTERM_BP_FAT	GO:0008584~male gonad development	3	0.669643	0.753361	ZFPM2, SEMA3A, INSR	330	136	16650	1.11297	1	0.998464	100
GOTERM_BP_FAT	GO:0046661~male sex differentiation	3	0.669643	0.822635	ZFPM2, SEMA3A, INSR	330	158	16650	0.957998	1	0.99942	100
Annotation Cluster 112	Enrichment Score: 0.3435301090776733
Category	Term	Count	%	PValue	Genes	List Total	Pop Hits	Pop Total	Fold Enrichment	Bonferroni	Benjamini	FDR
GOTERM_BP_FAT	GO:0006310~DNA recombination	8	1.78571	0.2608	POLD4, RAD51B, ZFYVE26, ZRANB3, RBPJ, RTEL1-TNFRSF6B, INO80C, RTEL1	330	262	16650	1.5406	1	0.960561	99.6424
GOTERM_MF_FAT	GO:0003678~DNA helicase activity	3	0.669643	0.314729	ZRANB3, RTEL1-TNFRSF6B, RTEL1	315	56	15478	2.63231	1	0.927146	99.6968
GOTERM_BP_FAT	GO:0000018~regulation of DNA recombination	3	0.669643	0.354549	ZRANB3, RTEL1-TNFRSF6B, RTEL1	330	63	16650	2.4026	1	0.975349	99.9715
GOTERM_BP_FAT	GO:0006260~DNA replication	7	1.5625	0.51233	POLD4, IGF1R, ZRANB3, RTEL1-TNFRSF6B, INSR, RTEL1, GLI1	330	290	16650	1.21787	1	0.98944	99.9998
GOTERM_BP_FAT	GO:0051052~regulation of DNA metabolic process	7	1.5625	0.742944	IGF1R, AIFM1, ZRANB3, RTEL1-TNFRSF6B, INSR, RTEL1, GLI1	330	370	16650	0.954545	1	0.998281	100
GOTERM_BP_FAT	GO:0006261~DNA-dependent DNA replication	3	0.669643	0.784138	POLD4, ZRANB3, RTEL1	330	145	16650	1.04389	1	0.998947	100
Annotation Cluster 113	Enrichment Score: 0.33178642455608487
Category	Term	Count	%	PValue	Genes	List Total	Pop Hits	Pop Total	Fold Enrichment	Bonferroni	Benjamini	FDR
GOTERM_BP_FAT	GO:0036294~cellular response to decreased oxygen levels	5	1.11607	0.295379	AIFM1, UBC, LMNA, RBPJ, PTEN	330	139	16650	1.81491	1	0.967724	99.8536
GOTERM_BP_FAT	GO:0071453~cellular response to oxygen levels	5	1.11607	0.340058	AIFM1, UBC, LMNA, RBPJ, PTEN	330	149	16650	1.69311	1	0.973195	99.9568
GOTERM_BP_FAT	GO:0071456~cellular response to hypoxia	4	0.892857	0.485763	UBC, LMNA, RBPJ, PTEN	330	132	16650	1.52893	1	0.987688	99.9996
GOTERM_BP_FAT	GO:0036293~response to decreased oxygen levels	7	1.5625	0.529337	CYP1A1, AIFM1, UBC, LMNA, CAPN2, RBPJ, PTEN	330	295	16650	1.19723	1	0.990475	99.9999
GOTERM_BP_FAT	GO:0070482~response to oxygen levels	7	1.5625	0.590222	CYP1A1, AIFM1, UBC, LMNA, CAPN2, RBPJ, PTEN	330	314	16650	1.12478	1	0.99362	100
GOTERM_BP_FAT	GO:0001666~response to hypoxia	6	1.33929	0.670155	CYP1A1, UBC, LMNA, CAPN2, RBPJ, PTEN	330	286	16650	1.05849	1	0.996642	100
Annotation Cluster 114	Enrichment Score: 0.32794832403678914
Category	Term	Count	%	PValue	Genes	List Total	Pop Hits	Pop Total	Fold Enrichment	Bonferroni	Benjamini	FDR
GOTERM_BP_FAT	GO:0044242~cellular lipid catabolic process	7	1.5625	0.152593	ACOX2, FAAH, MGLL, FGF21, LIPC, ETFA, GBA	330	182	16650	1.94056	1	0.923738	95.4346
GOTERM_BP_FAT	GO:0009062~fatty acid catabolic process	3	0.669643	0.515444	ACOX2, FAAH, ETFA	330	87	16650	1.73981	1	0.989644	99.9999
GOTERM_BP_FAT	GO:0072329~monocarboxylic acid catabolic process	3	0.669643	0.612313	ACOX2, FAAH, ETFA	330	104	16650	1.45542	1	0.994657	100
GOTERM_BP_FAT	GO:0016054~organic acid catabolic process	5	1.11607	0.642268	SLC25A21, ACOX2, FAAH, IDO2, ETFA	330	222	16650	1.13636	1	0.99585	100
GOTERM_BP_FAT	GO:0046395~carboxylic acid catabolic process	4	0.892857	0.741058	SLC25A21, ACOX2, FAAH, ETFA	330	194	16650	1.0403	1	0.998259	100
Annotation Cluster 115	Enrichment Score: 0.32463826535545093
Category	Term	Count	%	PValue	Genes	List Total	Pop Hits	Pop Total	Fold Enrichment	Bonferroni	Benjamini	FDR
GOTERM_BP_FAT	GO:0008284~positive regulation of cell proliferation	19	4.24107	0.413117	RAD51B, FZD3, PAXBP1, FGF21, PTEN, DDR2, RPTOR, ANXA2, GLI1, FOXP2, NOTCH3, IGF1R, EPGN, ITGB1BP1, TGM2, KDM4C, ZFPM2, RBPJ, INSR	330	849	16650	1.12914	1	0.982838	99.9952
GOTERM_BP_FAT	GO:0008283~cell proliferation	39	8.70536	0.443884	RAD51B, SOX5, PAXBP1, LGR5, DDR2, PTEN, ZNRF3, CITED1, GLI1, ARX, GPC4, IGF1R, SHB, TMEM127, PDE1A, TGM2, INSR, DIXDC1, ERG, DAB2IP, PDXK, CYP1A1, EMX1, LMNA, FZD3, FGF21, MECOM, RPTOR, ANXA2, FOXP2, NOTCH3, EPS15, EPGN, ITGB1BP1, MNT, KDM4C, ZFPM2, MCC, RBPJ	330	1861	16650	1.05735	1	0.985381	99.9982
GOTERM_BP_FAT	GO:0042127~regulation of cell proliferation	31	6.91964	0.579085	RAD51B, PAXBP1, PTEN, DDR2, LGR5, GLI1, ARX, IGF1R, TMEM127, PDE1A, TGM2, INSR, DAB2IP, EMX1, FA2H, LMNA, FZD3, FGF21, RPTOR, ANXA2, FOXP2, NOTCH3, EPS15, EPGN, ITGB1BP1, MNT, KDM4C, MCC, ZFPM2, RBPJ, NR5A2	330	1552	16650	1.00779	1	0.993208	100
Annotation Cluster 116	Enrichment Score: 0.3230174348619418
Category	Term	Count	%	PValue	Genes	List Total	Pop Hits	Pop Total	Fold Enrichment	Bonferroni	Benjamini	FDR
GOTERM_BP_FAT	GO:0008219~cell death	43	9.59821	0.307882	GCLC, NFKB1, OSGIN1, SGMS1, PTEN, CITED1, IGF1R, SHB, TSC22D3, ATN1, KRT8, PPP2CB, PDE1A, TGM2, NFATC4, FAIM, UNC5D, PDE8A, SEMA3A, WWOX, RBM25, GBA, ARHGEF3, KLLN, DAB2IP, YARS, AIFM1, PTPRH, LMNA, TRIO, FZD3, FGF21, MECOM, ARHGEF11, NDOR1, SEMA6A, INHBE, UBC, MNT, PLA2G6, ZFPM2, APBB2, ARHGAP10	330	1958	16650	1.10804	1	0.968592	99.8951
GOTERM_BP_FAT	GO:0006915~apoptotic process	37	8.25893	0.410556	GCLC, NFKB1, OSGIN1, SGMS1, PTEN, CITED1, IGF1R, SHB, TSC22D3, ATN1, KRT8, PPP2CB, PDE1A, TGM2, NFATC4, FAIM, UNC5D, SEMA3A, WWOX, ARHGEF3, KLLN, DAB2IP, YARS, AIFM1, PTPRH, LMNA, TRIO, FZD3, FGF21, MECOM, ARHGEF11, SEMA6A, UBC, MNT, PLA2G6, APBB2, ARHGAP10	330	1747	16650	1.06859	1	0.982784	99.9947
GOTERM_BP_FAT	GO:0060548~negative regulation of cell death	20	4.46429	0.4153	GCLC, LMNA, NFKB1, FZD3, SGMS1, FGF21, MECOM, PTEN, CITED1, IGF1R, TSC22D3, MNT, TGM2, UBC, FAIM, ZFPM2, PDE8A, APBB2, GBA, ARHGAP10	330	897	16650	1.12496	1	0.982938	99.9955
GOTERM_BP_FAT	GO:0012501~programmed cell death	39	8.70536	0.43276	GCLC, NFKB1, OSGIN1, SGMS1, PTEN, CITED1, IGF1R, SHB, TSC22D3, ATN1, KRT8, PPP2CB, PDE1A, TGM2, NFATC4, FAIM, UNC5D, SEMA3A, WWOX, RBM25, ARHGEF3, KLLN, DAB2IP, YARS, AIFM1, PTPRH, LMNA, TRIO, FZD3, FGF21, MECOM, ARHGEF11, SEMA6A, INHBE, UBC, MNT, PLA2G6, APBB2, ARHGAP10	330	1852	16650	1.06249	1	0.984321	99.9974
GOTERM_BP_FAT	GO:0010941~regulation of cell death	32	7.14286	0.442127	GCLC, NFKB1, OSGIN1, SGMS1, PTEN, CITED1, IGF1R, TSC22D3, PDE1A, TGM2, FAIM, NFATC4, PDE8A, RBM25, WWOX, GBA, ARHGEF3, DAB2IP, AIFM1, LMNA, TRIO, FZD3, FGF21, MECOM, ARHGEF11, INHBE, MNT, UBC, PLA2G6, ZFPM2, APBB2, ARHGAP10	330	1509	16650	1.06994	1	0.985589	99.9981
GOTERM_BP_FAT	GO:0043065~positive regulation of apoptotic process	13	2.90179	0.459332	ARHGEF3, DAB2IP, AIFM1, TRIO, OSGIN1, PTEN, ARHGEF11, TGM2, UBC, PLA2G6, NFATC4, APBB2, WWOX	330	572	16650	1.14669	1	0.986635	99.9989
GOTERM_BP_FAT	GO:0043068~positive regulation of programmed cell death	13	2.90179	0.464731	ARHGEF3, DAB2IP, AIFM1, TRIO, OSGIN1, PTEN, ARHGEF11, TGM2, UBC, PLA2G6, NFATC4, APBB2, WWOX	330	577	16650	1.13676	1	0.9864	99.9991
GOTERM_BP_FAT	GO:0043067~regulation of programmed cell death	29	6.47321	0.522908	GCLC, NFKB1, OSGIN1, SGMS1, PTEN, CITED1, IGF1R, TSC22D3, PDE1A, TGM2, FAIM, NFATC4, RBM25, WWOX, ARHGEF3, DAB2IP, AIFM1, LMNA, TRIO, FZD3, FGF21, MECOM, ARHGEF11, INHBE, MNT, UBC, PLA2G6, APBB2, ARHGAP10	330	1413	16650	1.03551	1	0.990133	99.9999
GOTERM_BP_FAT	GO:0010942~positive regulation of cell death	13	2.90179	0.54097	ARHGEF3, DAB2IP, AIFM1, TRIO, OSGIN1, PTEN, ARHGEF11, TGM2, UBC, PLA2G6, NFATC4, APBB2, WWOX	330	607	16650	1.08058	1	0.991115	100
GOTERM_BP_FAT	GO:0043069~negative regulation of programmed cell death	17	3.79464	0.57528	GCLC, LMNA, NFKB1, FZD3, SGMS1, FGF21, MECOM, PTEN, CITED1, IGF1R, TSC22D3, MNT, TGM2, UBC, FAIM, APBB2, ARHGAP10	330	829	16650	1.03465	1	0.993091	100
GOTERM_BP_FAT	GO:0042981~regulation of apoptotic process	28	6.25	0.582343	GCLC, OSGIN1, NFKB1, SGMS1, PTEN, CITED1, IGF1R, TSC22D3, PDE1A, TGM2, NFATC4, FAIM, RBM25, WWOX, ARHGEF3, DAB2IP, AIFM1, LMNA, TRIO, FZD3, FGF21, ARHGEF11, INHBE, UBC, MNT, PLA2G6, APBB2, ARHGAP10	330	1400	16650	1.00909	1	0.993321	100
GOTERM_BP_FAT	GO:0043066~negative regulation of apoptotic process	16	3.57143	0.654476	GCLC, LMNA, NFKB1, FZD3, SGMS1, FGF21, PTEN, CITED1, IGF1R, TSC22D3, MNT, TGM2, UBC, FAIM, APBB2, ARHGAP10	330	818	16650	0.986886	1	0.996104	100
Annotation Cluster 117	Enrichment Score: 0.3085549892799029
Category	Term	Count	%	PValue	Genes	List Total	Pop Hits	Pop Total	Fold Enrichment	Bonferroni	Benjamini	FDR
GOTERM_BP_FAT	GO:0021782~glial cell development	3	0.669643	0.477641	LAMB2, FA2H, PTEN	330	81	16650	1.86869	1	0.987267	99.9994
GOTERM_BP_FAT	GO:0010001~glial cell differentiation	5	1.11607	0.48186	DAB1, LAMB2, EMX1, FA2H, PTEN	330	181	16650	1.39377	1	0.987237	99.9995
GOTERM_BP_FAT	GO:0042063~gliogenesis	6	1.33929	0.515599	DAB2IP, DAB1, LAMB2, EMX1, FA2H, PTEN	330	240	16650	1.26136	1	0.989592	99.9999
Annotation Cluster 118	Enrichment Score: 0.3060074546025585
Category	Term	Count	%	PValue	Genes	List Total	Pop Hits	Pop Total	Fold Enrichment	Bonferroni	Benjamini	FDR
GOTERM_BP_FAT	GO:0051290~protein heterotetramerization	3	0.669643	0.201278	HIST1H3J, INSR, ANXA2	330	42	16650	3.6039	1	0.94408	98.4849
GOTERM_BP_FAT	GO:0051262~protein tetramerization	4	0.892857	0.515417	HIST1H3J, IGF1R, INSR, ANXA2	330	138	16650	1.46245	1	0.989712	99.9999
GOTERM_BP_FAT	GO:0051291~protein heterooligomerization	3	0.669643	0.693717	HIST1H3J, INSR, ANXA2	330	121	16650	1.25094	1	0.997281	100
GOTERM_BP_FAT	GO:0051259~protein oligomerization	8	1.78571	0.829534	HIST1H3J, IGF1R, KCNB2, ATXN10, TGM2, INSR, ANXA2, GBA	330	473	16650	0.853354	1	0.999483	100
Annotation Cluster 119	Enrichment Score: 0.3039917602783555
Category	Term	Count	%	PValue	Genes	List Total	Pop Hits	Pop Total	Fold Enrichment	Bonferroni	Benjamini	FDR
GOTERM_BP_FAT	GO:0006024~glycosaminoglycan biosynthetic process	4	0.892857	0.381535	GPC4, NFKB1, EXT1, GLCE	330	112	16650	1.80195	1	0.980299	99.9871
GOTERM_BP_FAT	GO:0006023~aminoglycan biosynthetic process	4	0.892857	0.386893	GPC4, NFKB1, EXT1, GLCE	330	113	16650	1.786	1	0.980916	99.9891
GOTERM_BP_FAT	GO:0030203~glycosaminoglycan metabolic process	4	0.892857	0.624039	GPC4, NFKB1, EXT1, GLCE	330	162	16650	1.24579	1	0.995156	100
GOTERM_BP_FAT	GO:0006022~aminoglycan metabolic process	4	0.892857	0.66023	GPC4, NFKB1, EXT1, GLCE	330	171	16650	1.18022	1	0.996354	100
Annotation Cluster 120	Enrichment Score: 0.2983335217108093
Category	Term	Count	%	PValue	Genes	List Total	Pop Hits	Pop Total	Fold Enrichment	Bonferroni	Benjamini	FDR
GOTERM_BP_FAT	GO:0043393~regulation of protein binding	5	1.11607	0.468946	PLCL1, DAB2IP, ITGB1BP1, NFATC4, ANXA2	330	178	16650	1.41726	1	0.986742	99.9992
GOTERM_BP_FAT	GO:0032091~negative regulation of protein binding	3	0.669643	0.490442	ITGB1BP1, NFATC4, ANXA2	330	83	16650	1.82366	1	0.987991	99.9997
GOTERM_BP_FAT	GO:0051100~negative regulation of binding	4	0.892857	0.510537	ITGB1BP1, ZNF462, NFATC4, ANXA2	330	137	16650	1.47313	1	0.989416	99.9998
GOTERM_BP_FAT	GO:0051098~regulation of binding	7	1.5625	0.545667	PLCL1, DAB2IP, ITGB1BP1, EBF2, ZNF462, NFATC4, ANXA2	330	300	16650	1.17727	1	0.991475	100
Annotation Cluster 121	Enrichment Score: 0.29689603047231605
Category	Term	Count	%	PValue	Genes	List Total	Pop Hits	Pop Total	Fold Enrichment	Bonferroni	Benjamini	FDR
GOTERM_BP_FAT	GO:0006310~DNA recombination	8	1.78571	0.2608	POLD4, RAD51B, ZFYVE26, ZRANB3, RBPJ, RTEL1-TNFRSF6B, INO80C, RTEL1	330	262	16650	1.5406	1	0.960561	99.6424
GOTERM_MF_FAT	GO:0008094~DNA-dependent ATPase activity	3	0.669643	0.491541	RAD51B, RTEL1-TNFRSF6B, RTEL1	315	81	15478	1.81987	1	0.969816	99.9969
GOTERM_MF_FAT	GO:0042623~ATPase activity, coupled	7	1.5625	0.652008	RAD51B, ATP2C1, MYO7A, DDX59, TDRD9, RTEL1-TNFRSF6B, RTEL1	315	326	15478	1.05508	1	0.990172	100
GOTERM_BP_FAT	GO:0006302~double-strand break repair	4	0.892857	0.776774	RAD51B, ZFYVE26, RTEL1-TNFRSF6B, RTEL1	330	206	16650	0.9797	1	0.998812	100
Annotation Cluster 122	Enrichment Score: 0.2896274300748588
Category	Term	Count	%	PValue	Genes	List Total	Pop Hits	Pop Total	Fold Enrichment	Bonferroni	Benjamini	FDR
GOTERM_BP_FAT	GO:0051403~stress-activated MAPK cascade	7	1.5625	0.342869	IGF1R, RAP2A, DAB2IP, UBC, NFKB1, MECOM, PLCB1	330	242	16650	1.45943	1	0.973166	99.9601
GOTERM_BP_FAT	GO:0031098~stress-activated protein kinase signaling cascade	7	1.5625	0.389193	IGF1R, RAP2A, DAB2IP, UBC, NFKB1, MECOM, PLCB1	330	254	16650	1.39048	1	0.980755	99.9898
GOTERM_BP_FAT	GO:0000165~MAPK cascade	19	4.24107	0.398359	RAP2A, DAB2IP, PTPRR, NFKB1, FGF21, MECOM, PTEN, IGF1R, EPGN, RGS3, ITGB1BP1, PSMD1, UBC, SPRED2, PPM1L, PDE8A, PLCB1, INSR, GBA	330	841	16650	1.13988	1	0.981433	99.9923
GOTERM_BP_FAT	GO:0046328~regulation of JNK cascade	5	1.11607	0.402823	IGF1R, RAP2A, DAB2IP, MECOM, PLCB1	330	163	16650	1.54769	1	0.981668	99.9933
GOTERM_BP_FAT	GO:0023014~signal transduction by protein phosphorylation	19	4.24107	0.46938	RAP2A, DAB2IP, PTPRR, NFKB1, FGF21, MECOM, PTEN, IGF1R, EPGN, RGS3, ITGB1BP1, PSMD1, UBC, SPRED2, PPM1L, PDE8A, PLCB1, INSR, GBA	330	877	16650	1.09309	1	0.986626	99.9993
GOTERM_BP_FAT	GO:0071347~cellular response to interleukin-1	3	0.669643	0.521567	DAB2IP, NFKB1, PLCB1	330	88	16650	1.72004	1	0.990029	99.9999
GOTERM_BP_FAT	GO:0032872~regulation of stress-activated MAPK cascade	5	1.11607	0.560223	IGF1R, RAP2A, DAB2IP, MECOM, PLCB1	330	200	16650	1.26136	1	0.992208	100
GOTERM_BP_FAT	GO:0070302~regulation of stress-activated protein kinase signaling cascade	5	1.11607	0.564043	IGF1R, RAP2A, DAB2IP, MECOM, PLCB1	330	201	16650	1.25509	1	0.992442	100
GOTERM_BP_FAT	GO:0080135~regulation of cellular response to stress	12	2.67857	0.600707	IGF1R, RAP2A, DAB2IP, FUT8, SPRED2, PDE8A, MECOM, RTEL1-TNFRSF6B, PLCB1, PTEN, RTEL1, RPTOR	330	581	16650	1.04209	1	0.99413	100
GOTERM_BP_FAT	GO:0007254~JNK cascade	4	0.892857	0.704477	DAB2IP, UBC, MECOM, PLCB1	330	183	16650	1.10283	1	0.997519	100
GOTERM_BP_FAT	GO:0080134~regulation of response to stress	20	4.46429	0.929775	RAP2A, DAB2IP, FUT8, NFKB1, MECOM, PTEN, RPTOR, ANXA2, IGF1R, PSMD1, TGM2, UBC, SPRED2, MGLL, PDE8A, RTEL1-TNFRSF6B, PLCB1, PHLDB2, RTEL1, GBA	330	1285	16650	0.785285	1	0.999967	100
Annotation Cluster 123	Enrichment Score: 0.2889425812436254
Category	Term	Count	%	PValue	Genes	List Total	Pop Hits	Pop Total	Fold Enrichment	Bonferroni	Benjamini	FDR
GOTERM_BP_FAT	GO:0045667~regulation of osteoblast differentiation	4	0.892857	0.370789	FBN2, DDR2, CITED1, GLI1	330	110	16650	1.83471	1	0.978829	99.9823
GOTERM_BP_FAT	GO:0030278~regulation of ossification	5	1.11607	0.486943	FBN2, RBPJ, DDR2, CITED1, GLI1	330	182	16650	1.38611	1	0.987787	99.9996
GOTERM_BP_FAT	GO:0001649~osteoblast differentiation	5	1.11607	0.539994	FBN2, DDR2, CITED1, WWOX, GLI1	330	195	16650	1.29371	1	0.991063	99.9999
GOTERM_BP_FAT	GO:0001503~ossification	7	1.5625	0.716532	FBN2, RBPJ, EXT1, DDR2, CITED1, WWOX, GLI1	330	359	16650	0.983793	1	0.997713	100
Annotation Cluster 124	Enrichment Score: 0.2884338115250932
Category	Term	Count	%	PValue	Genes	List Total	Pop Hits	Pop Total	Fold Enrichment	Bonferroni	Benjamini	FDR
GOTERM_BP_FAT	GO:0045740~positive regulation of DNA replication	3	0.669643	0.303801	IGF1R, INSR, GLI1	330	56	16650	2.70292	1	0.967577	99.883
GOTERM_BP_FAT	GO:0006275~regulation of DNA replication	4	0.892857	0.408208	IGF1R, ZRANB3, INSR, GLI1	330	117	16650	1.72494	1	0.982516	99.9943
GOTERM_BP_FAT	GO:0006260~DNA replication	7	1.5625	0.51233	POLD4, IGF1R, ZRANB3, RTEL1-TNFRSF6B, INSR, RTEL1, GLI1	330	290	16650	1.21787	1	0.98944	99.9998
GOTERM_BP_FAT	GO:0051052~regulation of DNA metabolic process	7	1.5625	0.742944	IGF1R, AIFM1, ZRANB3, RTEL1-TNFRSF6B, INSR, RTEL1, GLI1	330	370	16650	0.954545	1	0.998281	100
GOTERM_BP_FAT	GO:0051054~positive regulation of DNA metabolic process	4	0.892857	0.765342	IGF1R, INSR, RTEL1, GLI1	330	202	16650	0.9991	1	0.998676	100
Annotation Cluster 125	Enrichment Score: 0.28742639618574334
Category	Term	Count	%	PValue	Genes	List Total	Pop Hits	Pop Total	Fold Enrichment	Bonferroni	Benjamini	FDR
GOTERM_BP_FAT	GO:0097191~extrinsic apoptotic signaling pathway	7	1.5625	0.285934	DAB2IP, GCLC, KRT8, LMNA, SGMS1, PTEN, WWOX	330	225	16650	1.5697	1	0.965506	99.8123
GOTERM_BP_FAT	GO:2001236~regulation of extrinsic apoptotic signaling pathway	5	1.11607	0.393894	GCLC, LMNA, SGMS1, PTEN, WWOX	330	161	16650	1.56691	1	0.980908	99.9912
GOTERM_BP_FAT	GO:2001233~regulation of apoptotic signaling pathway	9	2.00893	0.477985	DAB2IP, GCLC, LMNA, MNT, PLA2G6, NFATC4, SGMS1, PTEN, WWOX	330	380	16650	1.19498	1	0.987142	99.9995
GOTERM_BP_FAT	GO:2001237~negative regulation of extrinsic apoptotic signaling pathway	3	0.669643	0.617527	GCLC, LMNA, SGMS1	330	105	16650	1.44156	1	0.994863	100
GOTERM_BP_FAT	GO:0097190~apoptotic signaling pathway	11	2.45536	0.720012	DAB2IP, GCLC, AIFM1, KRT8, LMNA, MNT, PLA2G6, NFATC4, SGMS1, PTEN, WWOX	330	583	16650	0.951973	1	0.997782	100
GOTERM_BP_FAT	GO:2001234~negative regulation of apoptotic signaling pathway	4	0.892857	0.787747	GCLC, LMNA, MNT, SGMS1	330	210	16650	0.961039	1	0.998994	100
Annotation Cluster 126	Enrichment Score: 0.2847385025957945
Category	Term	Count	%	PValue	Genes	List Total	Pop Hits	Pop Total	Fold Enrichment	Bonferroni	Benjamini	FDR
GOTERM_MF_FAT	GO:0016597~amino acid binding	3	0.669643	0.314729	DDC, SLC1A3, NEDD4	315	56	15478	2.63231	1	0.927146	99.6968
GOTERM_MF_FAT	GO:0031406~carboxylic acid binding	4	0.892857	0.650074	DDC, SLC1A3, GCLC, NEDD4	315	164	15478	1.19845	1	0.990183	100
GOTERM_MF_FAT	GO:0043168~anion binding	6	1.33929	0.683731	DDC, SLC1A3, GCLC, PDXK, NEDD4, KIF16B	315	283	15478	1.04176	1	0.992793	100
Annotation Cluster 127	Enrichment Score: 0.2770621675387155
Category	Term	Count	%	PValue	Genes	List Total	Pop Hits	Pop Total	Fold Enrichment	Bonferroni	Benjamini	FDR
GOTERM_MF_FAT	GO:0015294~solute:cation symporter activity	4	0.892857	0.31447	SLC2A13, SLC1A3, SLC45A4, SLC28A1	315	97	15478	2.02625	1	0.928612	99.695
GOTERM_MF_FAT	GO:0015293~symporter activity	5	1.11607	0.325639	SLC2A13, SLC4A10, SLC1A3, SLC45A4, SLC28A1	315	142	15478	1.73016	1	0.92696	99.763
GOTERM_MF_FAT	GO:0015291~secondary active transmembrane transporter activity	7	1.5625	0.341656	SLC2A13, SLC4A10, SLC1A3, SLC45A4, SLCO3A1, TMCO3, SLC28A1	315	234	15478	1.4699	1	0.933376	99.8361
GOTERM_MF_FAT	GO:0022804~active transmembrane transporter activity	8	1.78571	0.618762	SLC2A13, SLC4A10, SLC1A3, SLC45A4, ATP2C1, SLCO3A1, TMCO3, SLC28A1	315	367	15478	1.0711	1	0.987622	100
GOTERM_MF_FAT	GO:0008324~cation transmembrane transporter activity	11	2.45536	0.806468	KCNU1, SLC2A13, KCNJ4, SLC1A3, SLC45A4, KCNB2, ATP2C1, SLC39A6, TMCO3, SLC28A1, KCNIP4	315	616	15478	0.877438	1	0.997917	100
GOTERM_BP_FAT	GO:0015992~proton transport	3	0.669643	0.808617	SLC2A13, SLC4A10, TMCO3	330	153	16650	0.989305	1	0.999281	100
GOTERM_BP_FAT	GO:0006818~hydrogen transport	3	0.669643	0.814339	SLC2A13, SLC4A10, TMCO3	330	155	16650	0.97654	1	0.999335	100
Annotation Cluster 128	Enrichment Score: 0.26976019471605345
Category	Term	Count	%	PValue	Genes	List Total	Pop Hits	Pop Total	Fold Enrichment	Bonferroni	Benjamini	FDR
GOTERM_BP_FAT	GO:0034728~nucleosome organization	6	1.33929	0.27646	HIST1H2BO, HIST1H3J, SMARCD2, ARID1A, CENPU, PTMA	330	178	16650	1.70072	1	0.96399	99.7601
GOTERM_MF_FAT	GO:0031491~nucleosome binding	3	0.669643	0.373881	HIST1H3J, SMARCD2, ARID1A	315	64	15478	2.30327	1	0.944577	99.9241
GOTERM_BP_FAT	GO:0071103~DNA conformation change	7	1.5625	0.493344	HIST1H2BO, HIST1H3J, AIFM1, UBC, CENPU, ZRANB3, RTEL1	330	284	16650	1.2436	1	0.988185	99.9997
GOTERM_BP_FAT	GO:0065004~protein-DNA complex assembly	6	1.33929	0.495099	HIST1H2BO, TAF2, HIST1H3J, RAD51B, UBC, CENPU	330	235	16650	1.2882	1	0.988285	99.9997
GOTERM_BP_FAT	GO:0006333~chromatin assembly or disassembly	5	1.11607	0.523926	HIST1H2BO, HIST1H3J, SMARCD2, ARID1A, CENPU	330	191	16650	1.3208	1	0.990127	99.9999
GOTERM_BP_FAT	GO:0006323~DNA packaging	4	0.892857	0.77396	HIST1H2BO, HIST1H3J, AIFM1, CENPU	330	205	16650	0.984479	1	0.998789	100
GOTERM_BP_FAT	GO:0006334~nucleosome assembly	3	0.669643	0.80274	HIST1H2BO, HIST1H3J, CENPU	330	151	16650	1.00241	1	0.999216	100
GOTERM_BP_FAT	GO:0031497~chromatin assembly	3	0.669643	0.845565	HIST1H2BO, HIST1H3J, CENPU	330	167	16650	0.906369	1	0.999629	100
Annotation Cluster 129	Enrichment Score: 0.26908434618665183
Category	Term	Count	%	PValue	Genes	List Total	Pop Hits	Pop Total	Fold Enrichment	Bonferroni	Benjamini	FDR
GOTERM_BP_FAT	GO:0050880~regulation of blood vessel size	4	0.892857	0.500701	GCLC, ITGB1BP1, MKKS, PLA2G6	330	135	16650	1.49495	1	0.988633	99.9998
GOTERM_BP_FAT	GO:0035150~regulation of tube size	4	0.892857	0.505632	GCLC, ITGB1BP1, MKKS, PLA2G6	330	136	16650	1.48396	1	0.988878	99.9998
GOTERM_BP_FAT	GO:0003018~vascular process in circulatory system	4	0.892857	0.61565	GCLC, ITGB1BP1, MKKS, PLA2G6	330	160	16650	1.26136	1	0.994797	100
Annotation Cluster 130	Enrichment Score: 0.26699126385587446
Category	Term	Count	%	PValue	Genes	List Total	Pop Hits	Pop Total	Fold Enrichment	Bonferroni	Benjamini	FDR
GOTERM_BP_FAT	GO:0046486~glycerolipid metabolic process	11	2.45536	0.21809	DGKB, PITPNM3, PIGM, PLA2G6, MGLL, INPP4B, FGF21, PLCB1, LIPC, PTEN, BPNT1	330	379	16650	1.46438	1	0.948782	98.9809
GOTERM_BP_FAT	GO:0046488~phosphatidylinositol metabolic process	6	1.33929	0.357818	PITPNM3, PIGM, INPP4B, PLCB1, PTEN, BPNT1	330	199	16650	1.52124	1	0.97602	99.974
GOTERM_BP_FAT	GO:0006650~glycerophospholipid metabolic process	7	1.5625	0.472574	PITPNM3, PIGM, PLA2G6, INPP4B, PLCB1, PTEN, BPNT1	330	278	16650	1.27044	1	0.986792	99.9993
GOTERM_BP_FAT	GO:0006644~phospholipid metabolic process	9	2.00893	0.51588	DAB2IP, PITPNM3, PIGM, PLA2G6, INPP4B, SGMS1, PLCB1, PTEN, BPNT1	330	393	16650	1.15545	1	0.989557	99.9999
GOTERM_BP_FAT	GO:0008654~phospholipid biosynthetic process	5	1.11607	0.635226	PIGM, PLA2G6, INPP4B, SGMS1, PTEN	330	220	16650	1.14669	1	0.995523	100
GOTERM_BP_FAT	GO:0046474~glycerophospholipid biosynthetic process	4	0.892857	0.671721	PIGM, PLA2G6, INPP4B, PTEN	330	174	16650	1.15987	1	0.996676	100
GOTERM_BP_FAT	GO:0006661~phosphatidylinositol biosynthetic process	3	0.669643	0.718885	PIGM, INPP4B, PTEN	330	127	16650	1.19184	1	0.997787	100
GOTERM_BP_FAT	GO:0045017~glycerolipid biosynthetic process	4	0.892857	0.768243	PIGM, PLA2G6, INPP4B, PTEN	330	203	16650	0.994178	1	0.998712	100
GOTERM_BP_FAT	GO:0090407~organophosphate biosynthetic process	9	2.00893	0.882037	NMNAT2, GPHN, PIGM, PLA2G6, INPP4B, AK5, SGMS1, IPMK, PTEN	330	572	16650	0.793865	1	0.999828	100
Annotation Cluster 131	Enrichment Score: 0.2659138659131444
Category	Term	Count	%	PValue	Genes	List Total	Pop Hits	Pop Total	Fold Enrichment	Bonferroni	Benjamini	FDR
GOTERM_CC_FAT	GO:0000790~nuclear chromatin	9	2.00893	0.299365	HIST1H2BO, HIST1H3J, USP3, SMARCD2, KDM4C, ARID1A, HIST1H2AM, PLCB1, INO80C	290	316	14527	1.4267	1	0.871918	99.3965
GOTERM_BP_FAT	GO:0006325~chromatin organization	18	4.01786	0.351818	HIST1H3J, USP3, KANSL3, ARID1A, PAXBP1, MECOM, PTMA, PADI1, HIST1H2BO, DPY30, SMARCD2, KDM4C, ZNF462, CENPU, HIST1H2AM, USP15, KDM6B, INO80C	330	768	16650	1.18253	1	0.974836	99.9691
GOTERM_CC_FAT	GO:0000785~chromatin	11	2.45536	0.459811	HIST1H2BO, HIST1H3J, USP3, SMARCD2, NEDD4, KDM4C, ARID1A, CAPN2, HIST1H2AM, PLCB1, INO80C	290	472	14527	1.16742	1	0.919524	99.9856
GOTERM_BP_FAT	GO:0051276~chromosome organization	25	5.58036	0.487731	HIST1H3J, USP3, AIFM1, KANSL3, ANAPC4, ARID1A, PAXBP1, MECOM, PTMA, PADI1, HIST1H2BO, DPY30, POLD4, SMARCD2, UBC, KDM4C, ZNF462, ZRANB3, CENPU, RTEL1-TNFRSF6B, HIST1H2AM, USP15, KDM6B, INO80C, RTEL1	330	1184	16650	1.06534	1	0.987825	99.9996
GOTERM_CC_FAT	GO:0044427~chromosomal part	17	3.79464	0.582912	HIST1H3J, RAD51B, USP3, ARID1A, CAPN2, HIST1H2BO, DPY30, POLD4, SMARCD2, NEDD4, PPP2CB, KDM4C, CENPU, ZRANB3, PLCB1, HIST1H2AM, INO80C	290	827	14527	1.02973	1	0.956457	99.9996
GOTERM_CC_FAT	GO:0044454~nuclear chromosome part	11	2.45536	0.58652	HIST1H2BO, POLD4, HIST1H3J, USP3, SMARCD2, KDM4C, ARID1A, ZRANB3, HIST1H2AM, PLCB1, INO80C	290	519	14527	1.0617	1	0.956813	99.9997
GOTERM_CC_FAT	GO:0000228~nuclear chromosome	11	2.45536	0.670439	HIST1H2BO, POLD4, HIST1H3J, USP3, SMARCD2, KDM4C, ARID1A, ZRANB3, HIST1H2AM, PLCB1, INO80C	290	555	14527	0.992836	1	0.973573	100
GOTERM_CC_FAT	GO:0005694~chromosome	18	4.01786	0.688824	HIST1H3J, RAD51B, USP3, ARID1A, CAPN2, HIST1H2BO, DPY30, POLD4, NUMA1, SMARCD2, NEDD4, PPP2CB, KDM4C, CENPU, ZRANB3, HIST1H2AM, PLCB1, INO80C	290	937	14527	0.962301	1	0.975815	100
GOTERM_BP_FAT	GO:0016569~covalent chromatin modification	10	2.23214	0.763125	DPY30, USP3, SMARCD2, KANSL3, KDM4C, ARID1A, PAXBP1, MECOM, USP15, KDM6B	330	550	16650	0.917355	1	0.998638	100
GOTERM_BP_FAT	GO:0016570~histone modification	8	1.78571	0.770254	DPY30, USP3, KANSL3, KDM4C, PAXBP1, MECOM, USP15, KDM6B	330	440	16650	0.917355	1	0.998743	100
Annotation Cluster 132	Enrichment Score: 0.26571865060860234
Category	Term	Count	%	PValue	Genes	List Total	Pop Hits	Pop Total	Fold Enrichment	Bonferroni	Benjamini	FDR
GOTERM_BP_FAT	GO:0008544~epidermis development	8	1.78571	0.381942	ATP2C1, FA2H, MYO7A, FZD3, RBPJ, INSR, LGR5, GLI1	330	300	16650	1.34545	1	0.980251	99.9873
GOTERM_BP_FAT	GO:0022405~hair cycle process	3	0.669643	0.464647	FZD3, RBPJ, LGR5	330	79	16650	1.916	1	0.986483	99.9991
GOTERM_BP_FAT	GO:0022404~molting cycle process	3	0.669643	0.464647	FZD3, RBPJ, LGR5	330	79	16650	1.916	1	0.986483	99.9991
GOTERM_BP_FAT	GO:0001942~hair follicle development	3	0.669643	0.464647	FZD3, RBPJ, LGR5	330	79	16650	1.916	1	0.986483	99.9991
GOTERM_BP_FAT	GO:0098773~skin epidermis development	3	0.669643	0.477641	FZD3, RBPJ, LGR5	330	81	16650	1.86869	1	0.987267	99.9994
GOTERM_BP_FAT	GO:0042633~hair cycle	3	0.669643	0.574303	FZD3, RBPJ, LGR5	330	97	16650	1.56045	1	0.993047	100
GOTERM_BP_FAT	GO:0042303~molting cycle	3	0.669643	0.574303	FZD3, RBPJ, LGR5	330	97	16650	1.56045	1	0.993047	100
GOTERM_BP_FAT	GO:0048839~inner ear development	4	0.892857	0.686597	MYO7A, FZD3, RBPJ, LGR5	330	178	16650	1.13381	1	0.997119	100
GOTERM_BP_FAT	GO:0043588~skin development	5	1.11607	0.689035	FA2H, FZD3, RBPJ, LGR5, GBA	330	236	16650	1.06895	1	0.99717	100
GOTERM_BP_FAT	GO:0043583~ear development	4	0.892857	0.771116	MYO7A, FZD3, RBPJ, LGR5	330	204	16650	0.989305	1	0.998737	100
Annotation Cluster 133	Enrichment Score: 0.26263557068533216
Category	Term	Count	%	PValue	Genes	List Total	Pop Hits	Pop Total	Fold Enrichment	Bonferroni	Benjamini	FDR
GOTERM_BP_FAT	GO:0007601~visual perception	6	1.33929	0.400935	EML2, LAMB2, EYS, MYO7A, MKKS, KIFC3	330	210	16650	1.44156	1	0.981633	99.9929
GOTERM_BP_FAT	GO:0050953~sensory perception of light stimulus	6	1.33929	0.412754	EML2, LAMB2, EYS, MYO7A, MKKS, KIFC3	330	213	16650	1.42125	1	0.982886	99.9951
GOTERM_BP_FAT	GO:0007600~sensory perception	12	2.67857	0.984754	EML2, SLC1A3, LAMB2, EYS, CNTN5, PDE1C, NAV2, MYO7A, MKKS, MGLL, DLG2, KIFC3	330	961	16650	0.630026	1	1	100
Annotation Cluster 134	Enrichment Score: 0.24197758162024208
Category	Term	Count	%	PValue	Genes	List Total	Pop Hits	Pop Total	Fold Enrichment	Bonferroni	Benjamini	FDR
GOTERM_CC_FAT	GO:0000123~histone acetyltransferase complex	3	0.669643	0.531385	TAF2, ELP2, KANSL3	290	89	14527	1.68853	1	0.946626	99.9981
GOTERM_CC_FAT	GO:1902493~acetyltransferase complex	3	0.669643	0.594743	TAF2, ELP2, KANSL3	290	100	14527	1.50279	1	0.956946	99.9998
GOTERM_CC_FAT	GO:0031248~protein acetyltransferase complex	3	0.669643	0.594743	TAF2, ELP2, KANSL3	290	100	14527	1.50279	1	0.956946	99.9998
Annotation Cluster 135	Enrichment Score: 0.2409129188225082
Category	Term	Count	%	PValue	Genes	List Total	Pop Hits	Pop Total	Fold Enrichment	Bonferroni	Benjamini	FDR
GOTERM_BP_FAT	GO:0046578~regulation of Ras protein signal transduction	6	1.33929	0.373469	ARHGEF3, RALGPS2, DAB2IP, PPP2CB, TRIO, ARHGEF11	330	203	16650	1.49127	1	0.979245	99.9836
GOTERM_MF_FAT	GO:0005089~Rho guanyl-nucleotide exchange factor activity	3	0.669643	0.471764	ARHGEF3, TRIO, ARHGEF11	315	78	15478	1.88987	1	0.967834	99.9944
GOTERM_MF_FAT	GO:0005085~guanyl-nucleotide exchange factor activity	7	1.5625	0.597224	ARHGEF3, RALGPS2, FNBP1L, TRIO, DENND2A, ARHGEF11, BCAR3	315	308	15478	1.11674	1	0.98521	99.9999
GOTERM_BP_FAT	GO:0035023~regulation of Rho protein signal transduction	3	0.669643	0.702306	ARHGEF3, TRIO, ARHGEF11	330	123	16650	1.2306	1	0.997482	100
GOTERM_MF_FAT	GO:0005088~Ras guanyl-nucleotide exchange factor activity	4	0.892857	0.844874	ARHGEF3, TRIO, DENND2A, ARHGEF11	315	228	15478	0.862044	1	0.99883	100
Annotation Cluster 136	Enrichment Score: 0.23454710742154133
Category	Term	Count	%	PValue	Genes	List Total	Pop Hits	Pop Total	Fold Enrichment	Bonferroni	Benjamini	FDR
GOTERM_BP_FAT	GO:0015980~energy derivation by oxidation of organic compounds	7	1.5625	0.446419	IMMP2L, UBC, NFATC4, DLAT, NDUFA10, INSR, ETFA	330	271	16650	1.30325	1	0.985536	99.9984
GOTERM_BP_FAT	GO:0045333~cellular respiration	5	1.11607	0.451593	IMMP2L, NFATC4, DLAT, NDUFA10, ETFA	330	174	16650	1.44984	1	0.985759	99.9986
GOTERM_BP_FAT	GO:0006091~generation of precursor metabolites and energy	9	2.00893	0.474065	IMMP2L, CISD1, ENO2, UBC, NFATC4, DLAT, NDUFA10, INSR, ETFA	330	379	16650	1.19813	1	0.98695	99.9994
GOTERM_BP_FAT	GO:0022904~respiratory electron transport chain	3	0.669643	0.637845	IMMP2L, NDUFA10, ETFA	330	109	16650	1.38866	1	0.995662	100
GOTERM_BP_FAT	GO:0022900~electron transport chain	3	0.669643	0.647683	IMMP2L, NDUFA10, ETFA	330	111	16650	1.36364	1	0.995978	100
GOTERM_CC_FAT	GO:0005759~mitochondrial matrix	4	0.892857	0.991545	DLAT, IARS2, NDUFA10, ETFA	290	425	14527	0.471465	1	0.99999	100
Annotation Cluster 137	Enrichment Score: 0.21328274788654003
Category	Term	Count	%	PValue	Genes	List Total	Pop Hits	Pop Total	Fold Enrichment	Bonferroni	Benjamini	FDR
GOTERM_BP_FAT	GO:0006342~chromatin silencing	4	0.892857	0.418783	DPY30, HIST1H3J, ARID1A, HIST1H2AM	330	119	16650	1.69595	1	0.98307	99.996
GOTERM_BP_FAT	GO:0045814~negative regulation of gene expression, epigenetic	4	0.892857	0.505632	DPY30, HIST1H3J, ARID1A, HIST1H2AM	330	136	16650	1.48396	1	0.988878	99.9998
GOTERM_BP_FAT	GO:0016458~gene silencing	5	1.11607	0.739803	DPY30, HIST1H3J, TDRD9, ARID1A, HIST1H2AM	330	253	16650	0.997125	1	0.998232	100
GOTERM_BP_FAT	GO:0040029~regulation of gene expression, epigenetic	4	0.892857	0.895219	DPY30, HIST1H3J, ARID1A, HIST1H2AM	330	263	16650	0.76737	1	0.99988	100
Annotation Cluster 138	Enrichment Score: 0.21262466420579235
Category	Term	Count	%	PValue	Genes	List Total	Pop Hits	Pop Total	Fold Enrichment	Bonferroni	Benjamini	FDR
GOTERM_BP_FAT	GO:0006310~DNA recombination	8	1.78571	0.2608	POLD4, RAD51B, ZFYVE26, ZRANB3, RBPJ, RTEL1-TNFRSF6B, INO80C, RTEL1	330	262	16650	1.5406	1	0.960561	99.6424
GOTERM_BP_FAT	GO:0006260~DNA replication	7	1.5625	0.51233	POLD4, IGF1R, ZRANB3, RTEL1-TNFRSF6B, INSR, RTEL1, GLI1	330	290	16650	1.21787	1	0.98944	99.9998
GOTERM_BP_FAT	GO:0006281~DNA repair	9	2.00893	0.826388	POLD4, RAD51B, USP3, ZFYVE26, UBC, ZRANB3, RTEL1-TNFRSF6B, INO80C, RTEL1	330	530	16650	0.856775	1	0.99945	100
GOTERM_BP_FAT	GO:0006974~cellular response to DNA damage stimulus	13	2.90179	0.878893	RAD51B, USP3, MACROD2, POLD4, IMMP2L, ZFYVE26, UBC, SPRED2, NFATC4, ZRANB3, RTEL1-TNFRSF6B, RTEL1, INO80C	330	807	16650	0.812775	1	0.999813	100
GOTERM_BP_FAT	GO:0006259~DNA metabolic process	16	3.57143	0.891044	ATF7IP, RAD51B, USP3, AIFM1, TDRD9, GLI1, POLD4, IGF1R, ZFYVE26, UBC, ZRANB3, RBPJ, RTEL1-TNFRSF6B, INSR, RTEL1, INO80C	330	995	16650	0.811329	1	0.999868	100
Annotation Cluster 139	Enrichment Score: 0.2102577584638991
Category	Term	Count	%	PValue	Genes	List Total	Pop Hits	Pop Total	Fold Enrichment	Bonferroni	Benjamini	FDR
GOTERM_CC_FAT	GO:0005930~axoneme	3	0.669643	0.578117	DNAH17, DNAH2, GLI1	290	97	14527	1.54927	1	0.955656	99.9996
GOTERM_CC_FAT	GO:0097014~ciliary plasm	3	0.669643	0.578117	DNAH17, DNAH2, GLI1	290	97	14527	1.54927	1	0.955656	99.9996
GOTERM_CC_FAT	GO:0044441~ciliary part	7	1.5625	0.700157	EPS15, DNAH17, MKKS, DNAH2, C5ORF42, GLIPR1L1, GLI1	290	350	14527	1.00186	1	0.976877	100
Annotation Cluster 140	Enrichment Score: 0.20940086031040406
Category	Term	Count	%	PValue	Genes	List Total	Pop Hits	Pop Total	Fold Enrichment	Bonferroni	Benjamini	FDR
GOTERM_BP_FAT	GO:0010035~response to inorganic substance	11	2.45536	0.448621	GCLC, CYP1A1, NEDD4, AIFM1, KRT8, PPP2CB, CYP2R1, NFATC4, PDE8A, PTEN, KDM6B	330	469	16650	1.18337	1	0.985629	99.9985
GOTERM_BP_FAT	GO:0042542~response to hydrogen peroxide	4	0.892857	0.450111	AIFM1, PPP2CB, PDE8A, KDM6B	330	125	16650	1.61455	1	0.985799	99.9986
GOTERM_BP_FAT	GO:0070301~cellular response to hydrogen peroxide	3	0.669643	0.458078	AIFM1, PDE8A, KDM6B	330	78	16650	1.94056	1	0.986515	99.9989
GOTERM_BP_FAT	GO:0034614~cellular response to reactive oxygen species	3	0.669643	0.710694	AIFM1, PDE8A, KDM6B	330	125	16650	1.21091	1	0.997699	100
GOTERM_BP_FAT	GO:0000302~response to reactive oxygen species	4	0.892857	0.787747	AIFM1, PPP2CB, PDE8A, KDM6B	330	210	16650	0.961039	1	0.998994	100
GOTERM_BP_FAT	GO:0006979~response to oxidative stress	7	1.5625	0.794339	GCLC, FUT8, AIFM1, PPP2CB, PDE8A, KDM6B, GBA	330	394	16650	0.896401	1	0.999092	100
GOTERM_BP_FAT	GO:0034599~cellular response to oxidative stress	4	0.892857	0.831723	AIFM1, PDE8A, KDM6B, GBA	330	228	16650	0.885167	1	0.999499	100
Annotation Cluster 141	Enrichment Score: 0.20554944987864332
Category	Term	Count	%	PValue	Genes	List Total	Pop Hits	Pop Total	Fold Enrichment	Bonferroni	Benjamini	FDR
GOTERM_BP_FAT	GO:0044702~single organism reproductive process	28	6.25	0.309659	RAD51B, UBE3A, TDRD9, PTEN, LGR5, CITED1, GLI1, ACTR3, KCNU1, IMMP2L, SHB, NUMA1, KRT8, MKKS, SEMA3A, PLCB1, SPATA5, INSR, GLIPR1L1, NPHP1, CYP1A1, FUT10, ARID1A, RNF114, TSGA10, PLA2G6, ZFPM2, RBPJ	330	1231	16650	1.14763	1	0.968607	99.9
GOTERM_BP_FAT	GO:0022414~reproductive process	29	6.47321	0.455214	RAD51B, UBE3A, TDRD9, LGR5, PTEN, CITED1, GLI1, ACTR3, LNPEP, KCNU1, IMMP2L, SHB, NUMA1, KRT8, MKKS, SEMA3A, PLCB1, SPATA5, INSR, GLIPR1L1, NPHP1, CYP1A1, FUT10, ARID1A, RNF114, TSGA10, PLA2G6, ZFPM2, RBPJ	330	1373	16650	1.06568	1	0.986311	99.9988
GOTERM_BP_FAT	GO:0000003~reproduction	29	6.47321	0.463836	RAD51B, UBE3A, TDRD9, LGR5, PTEN, CITED1, GLI1, ACTR3, LNPEP, KCNU1, IMMP2L, SHB, NUMA1, KRT8, MKKS, SEMA3A, PLCB1, SPATA5, INSR, GLIPR1L1, NPHP1, CYP1A1, FUT10, ARID1A, RNF114, TSGA10, PLA2G6, ZFPM2, RBPJ	330	1375	16650	1.06413	1	0.986634	99.9991
GOTERM_BP_FAT	GO:0019953~sexual reproduction	16	3.57143	0.560324	UBE3A, FUT10, TDRD9, PTEN, LGR5, GLI1, KCNU1, SHB, IMMP2L, RNF114, TSGA10, MKKS, PLCB1, GLIPR1L1, SPATA5, NPHP1	330	770	16650	1.04841	1	0.992164	100
GOTERM_BP_FAT	GO:0044703~multi-organism reproductive process	19	4.24107	0.582246	CYP1A1, UBE3A, FUT10, TDRD9, LGR5, PTEN, GLI1, KCNU1, LNPEP, SHB, IMMP2L, RNF114, TSGA10, MKKS, PLA2G6, PLCB1, GLIPR1L1, SPATA5, NPHP1	330	936	16650	1.02418	1	0.993358	100
GOTERM_BP_FAT	GO:0048609~multicellular organismal reproductive process	14	3.125	0.778486	CYP1A1, UBE3A, TDRD9, PTEN, LGR5, GLI1, SHB, IMMP2L, RNF114, TSGA10, MKKS, PLA2G6, SPATA5, NPHP1	330	783	16650	0.902125	1	0.998836	100
GOTERM_BP_FAT	GO:0032504~multicellular organism reproduction	14	3.125	0.791699	CYP1A1, UBE3A, TDRD9, PTEN, LGR5, GLI1, SHB, IMMP2L, RNF114, TSGA10, MKKS, PLA2G6, SPATA5, NPHP1	330	792	16650	0.891873	1	0.999054	100
GOTERM_BP_FAT	GO:0007283~spermatogenesis	8	1.78571	0.872357	IMMP2L, RNF114, TDRD9, TSGA10, MKKS, SPATA5, NPHP1, GLI1	330	503	16650	0.802458	1	0.999785	100
GOTERM_BP_FAT	GO:0048232~male gamete generation	8	1.78571	0.873617	IMMP2L, RNF114, TDRD9, TSGA10, MKKS, SPATA5, NPHP1, GLI1	330	504	16650	0.800866	1	0.999788	100
GOTERM_BP_FAT	GO:0007276~gamete generation	10	2.23214	0.878352	SHB, IMMP2L, RNF114, TDRD9, TSGA10, MKKS, SPATA5, LGR5, NPHP1, GLI1	330	629	16650	0.802139	1	0.999811	100
Annotation Cluster 142	Enrichment Score: 0.2047479272226309
Category	Term	Count	%	PValue	Genes	List Total	Pop Hits	Pop Total	Fold Enrichment	Bonferroni	Benjamini	FDR
GOTERM_BP_FAT	GO:0072524~pyridine-containing compound metabolic process	4	0.892857	0.480736	NMNAT2, PDXK, ENO2, INSR	330	131	16650	1.5406	1	0.987232	99.9995
GOTERM_BP_FAT	GO:0051188~cofactor biosynthetic process	5	1.11607	0.490382	NDOR1, NMNAT2, GPHN, PDXK, DLAT	330	183	16650	1.37854	1	0.988066	99.9997
GOTERM_BP_FAT	GO:0009108~coenzyme biosynthetic process	4	0.892857	0.539419	NMNAT2, GPHN, PDXK, DLAT	330	143	16650	1.41132	1	0.991181	99.9999
GOTERM_BP_FAT	GO:0051186~cofactor metabolic process	8	1.78571	0.641041	NDOR1, NMNAT2, GPHN, PDXK, CYP1A1, ENO2, DLAT, INSR	330	385	16650	1.04841	1	0.995804	100
GOTERM_BP_FAT	GO:0019362~pyridine nucleotide metabolic process	3	0.669643	0.702306	NMNAT2, ENO2, INSR	330	123	16650	1.2306	1	0.997482	100
GOTERM_BP_FAT	GO:0046496~nicotinamide nucleotide metabolic process	3	0.669643	0.702306	NMNAT2, ENO2, INSR	330	123	16650	1.2306	1	0.997482	100
GOTERM_BP_FAT	GO:0006732~coenzyme metabolic process	6	1.33929	0.749218	NMNAT2, GPHN, PDXK, ENO2, DLAT, INSR	330	315	16650	0.961039	1	0.9984	100
GOTERM_BP_FAT	GO:0006733~oxidoreduction coenzyme metabolic process	3	0.669643	0.764018	NMNAT2, ENO2, INSR	330	139	16650	1.08895	1	0.998651	100
Annotation Cluster 143	Enrichment Score: 0.20065636990870483
Category	Term	Count	%	PValue	Genes	List Total	Pop Hits	Pop Total	Fold Enrichment	Bonferroni	Benjamini	FDR
GOTERM_BP_FAT	GO:0019318~hexose metabolic process	6	1.33929	0.480517	FUT8, FUT10, ENO2, FUT1, DLAT, INSR	330	231	16650	1.31051	1	0.987286	99.9995
GOTERM_BP_FAT	GO:0005996~monosaccharide metabolic process	6	1.33929	0.527605	FUT8, FUT10, ENO2, FUT1, DLAT, INSR	330	243	16650	1.24579	1	0.990392	99.9999
GOTERM_BP_FAT	GO:0006090~pyruvate metabolic process	3	0.669643	0.574303	ENO2, DLAT, INSR	330	97	16650	1.56045	1	0.993047	100
GOTERM_BP_FAT	GO:0051186~cofactor metabolic process	8	1.78571	0.641041	NDOR1, NMNAT2, GPHN, PDXK, CYP1A1, ENO2, DLAT, INSR	330	385	16650	1.04841	1	0.995804	100
GOTERM_BP_FAT	GO:0006732~coenzyme metabolic process	6	1.33929	0.749218	NMNAT2, GPHN, PDXK, ENO2, DLAT, INSR	330	315	16650	0.961039	1	0.9984	100
GOTERM_BP_FAT	GO:0006006~glucose metabolic process	3	0.669643	0.894148	ENO2, DLAT, INSR	330	191	16650	0.79248	1	0.999876	100
Annotation Cluster 144	Enrichment Score: 0.19073916859981477
Category	Term	Count	%	PValue	Genes	List Total	Pop Hits	Pop Total	Fold Enrichment	Bonferroni	Benjamini	FDR
GOTERM_BP_FAT	GO:0009135~purine nucleoside diphosphate metabolic process	4	0.892857	0.257481	ENO2, AK5, INSR, DLG2	330	89	16650	2.26762	1	0.96066	99.6112
GOTERM_BP_FAT	GO:0009179~purine ribonucleoside diphosphate metabolic process	4	0.892857	0.257481	ENO2, AK5, INSR, DLG2	330	89	16650	2.26762	1	0.96066	99.6112
GOTERM_BP_FAT	GO:0009185~ribonucleoside diphosphate metabolic process	4	0.892857	0.268164	ENO2, AK5, INSR, DLG2	330	91	16650	2.21778	1	0.961758	99.7033
GOTERM_BP_FAT	GO:0009132~nucleoside diphosphate metabolic process	4	0.892857	0.381535	ENO2, AK5, INSR, DLG2	330	112	16650	1.80195	1	0.980299	99.9871
GOTERM_BP_FAT	GO:0046031~ADP metabolic process	3	0.669643	0.431351	ENO2, AK5, INSR	330	74	16650	2.04545	1	0.984384	99.9973
GOTERM_BP_FAT	GO:0006165~nucleoside diphosphate phosphorylation	3	0.669643	0.496769	ENO2, AK5, INSR	330	84	16650	1.80195	1	0.988373	99.9997
GOTERM_BP_FAT	GO:0046939~nucleotide phosphorylation	3	0.669643	0.533657	ENO2, AK5, INSR	330	90	16650	1.68182	1	0.990875	99.9999
GOTERM_BP_FAT	GO:0042278~purine nucleoside metabolic process	8	1.78571	0.567508	GPHN, MACROD2, ENO2, AK5, NDUFA10, BPNT1, INSR, DLG2	330	359	16650	1.12434	1	0.992636	100
GOTERM_BP_FAT	GO:1901135~carbohydrate derivative metabolic process	25	5.58036	0.584625	FUT8, FN3K, NFKB1, GPC4, GPHN, PIGM, GALNTL6, PDE1A, ENO2, HS6ST3, FUT1, PDE8A, PLCB1, BPNT1, INSR, DLG2, GBA, FUT10, MACROD2, AK5, PDE4D, NDUFA10, GLCE, EXT1, UGGT2	330	1247	16650	1.01152	1	0.993436	100
GOTERM_BP_FAT	GO:0019637~organophosphate metabolic process	21	4.6875	0.695751	NMNAT2, DAB2IP, AK5, PDE4D, SGMS1, NDUFA10, PTEN, GPHN, PIGM, PITPNM3, PDE1A, PLCH1, ENO2, PLA2G6, INPP4B, PDE8A, PLCB1, BPNT1, INSR, IPMK, DLG2	330	1108	16650	0.956268	1	0.997313	100
GOTERM_BP_FAT	GO:0009150~purine ribonucleotide metabolic process	10	2.23214	0.703537	GPHN, PDE1A, ENO2, AK5, PDE4D, PDE8A, NDUFA10, BPNT1, INSR, DLG2	330	520	16650	0.97028	1	0.997515	100
GOTERM_BP_FAT	GO:0072521~purine-containing compound metabolic process	11	2.45536	0.704023	GPHN, PDE1A, MACROD2, ENO2, AK5, PDE4D, PDE8A, NDUFA10, BPNT1, INSR, DLG2	330	575	16650	0.965217	1	0.997518	100
GOTERM_BP_FAT	GO:0046128~purine ribonucleoside metabolic process	7	1.5625	0.709015	GPHN, ENO2, AK5, NDUFA10, BPNT1, INSR, DLG2	330	356	16650	0.992084	1	0.99765	100
GOTERM_BP_FAT	GO:0009116~nucleoside metabolic process	8	1.78571	0.711569	GPHN, MACROD2, ENO2, AK5, NDUFA10, BPNT1, INSR, DLG2	330	413	16650	0.977328	1	0.9977	100
GOTERM_BP_FAT	GO:0009259~ribonucleotide metabolic process	10	2.23214	0.734445	GPHN, PDE1A, ENO2, AK5, PDE4D, PDE8A, NDUFA10, BPNT1, INSR, DLG2	330	535	16650	0.943076	1	0.998109	100
GOTERM_BP_FAT	GO:0006163~purine nucleotide metabolic process	10	2.23214	0.757569	GPHN, PDE1A, ENO2, AK5, PDE4D, PDE8A, NDUFA10, BPNT1, INSR, DLG2	330	547	16650	0.922387	1	0.998539	100
GOTERM_BP_FAT	GO:1901657~glycosyl compound metabolic process	8	1.78571	0.760088	GPHN, MACROD2, ENO2, AK5, NDUFA10, BPNT1, INSR, DLG2	330	435	16650	0.9279	1	0.998587	100
GOTERM_BP_FAT	GO:0019693~ribose phosphate metabolic process	10	2.23214	0.761283	GPHN, PDE1A, ENO2, AK5, PDE4D, PDE8A, NDUFA10, BPNT1, INSR, DLG2	330	549	16650	0.919026	1	0.998599	100
GOTERM_BP_FAT	GO:0009119~ribonucleoside metabolic process	7	1.5625	0.776057	GPHN, ENO2, AK5, NDUFA10, BPNT1, INSR, DLG2	330	385	16650	0.917355	1	0.998813	100
GOTERM_BP_FAT	GO:0009205~purine ribonucleoside triphosphate metabolic process	5	1.11607	0.776712	GPHN, ENO2, AK5, NDUFA10, INSR	330	267	16650	0.944842	1	0.99882	100
GOTERM_BP_FAT	GO:0009199~ribonucleoside triphosphate metabolic process	5	1.11607	0.791218	GPHN, ENO2, AK5, NDUFA10, INSR	330	273	16650	0.924076	1	0.999051	100
GOTERM_BP_FAT	GO:0009144~purine nucleoside triphosphate metabolic process	5	1.11607	0.793561	GPHN, ENO2, AK5, NDUFA10, INSR	330	274	16650	0.920703	1	0.999084	100
GOTERM_BP_FAT	GO:0009167~purine ribonucleoside monophosphate metabolic process	5	1.11607	0.817964	ENO2, AK5, NDUFA10, INSR, DLG2	330	285	16650	0.885167	1	0.999371	100
GOTERM_BP_FAT	GO:0009126~purine nucleoside monophosphate metabolic process	5	1.11607	0.82006	ENO2, AK5, NDUFA10, INSR, DLG2	330	286	16650	0.882072	1	0.999392	100
GOTERM_BP_FAT	GO:0009141~nucleoside triphosphate metabolic process	5	1.11607	0.841837	GPHN, ENO2, AK5, NDUFA10, INSR	330	297	16650	0.849403	1	0.9996	100
GOTERM_BP_FAT	GO:0009161~ribonucleoside monophosphate metabolic process	5	1.11607	0.841837	ENO2, AK5, NDUFA10, INSR, DLG2	330	297	16650	0.849403	1	0.9996	100
GOTERM_BP_FAT	GO:0009117~nucleotide metabolic process	11	2.45536	0.853613	NMNAT2, GPHN, PDE1A, ENO2, AK5, PDE4D, PDE8A, NDUFA10, BPNT1, INSR, DLG2	330	667	16650	0.832084	1	0.999689	100
GOTERM_BP_FAT	GO:0055086~nucleobase-containing small molecule metabolic process	12	2.67857	0.856776	NMNAT2, GPHN, PDE1A, MACROD2, ENO2, AK5, PDE4D, PDE8A, NDUFA10, BPNT1, INSR, DLG2	330	728	16650	0.831668	1	0.999712	100
GOTERM_BP_FAT	GO:0046034~ATP metabolic process	4	0.892857	0.862179	ENO2, AK5, NDUFA10, INSR	330	243	16650	0.830527	1	0.999742	100
GOTERM_BP_FAT	GO:0006753~nucleoside phosphate metabolic process	11	2.45536	0.863187	NMNAT2, GPHN, PDE1A, ENO2, AK5, PDE4D, PDE8A, NDUFA10, BPNT1, INSR, DLG2	330	675	16650	0.822222	1	0.999748	100
GOTERM_BP_FAT	GO:0009123~nucleoside monophosphate metabolic process	5	1.11607	0.866318	ENO2, AK5, NDUFA10, INSR, DLG2	330	311	16650	0.811166	1	0.999757	100
Annotation Cluster 145	Enrichment Score: 0.18811218790300938
Category	Term	Count	%	PValue	Genes	List Total	Pop Hits	Pop Total	Fold Enrichment	Bonferroni	Benjamini	FDR
GOTERM_CC_FAT	GO:0008076~voltage-gated potassium channel complex	5	1.11607	0.104619	KCNU1, KCNJ4, KCNB2, DLG2, KCNIP4	290	90	14527	2.78295	1	0.778467	79.5518
GOTERM_CC_FAT	GO:0034705~potassium channel complex	5	1.11607	0.107818	KCNU1, KCNJ4, KCNB2, DLG2, KCNIP4	290	91	14527	2.75237	1	0.771014	80.5762
GOTERM_BP_FAT	GO:0002028~regulation of sodium ion transport	4	0.892857	0.225842	NEDD4, SLMAP, CNTN1, NKAIN3	330	83	16650	2.43154	1	0.951676	99.1537
GOTERM_CC_FAT	GO:0034703~cation channel complex	6	1.33929	0.261953	KCNU1, KCNJ4, KCNB2, PDE4D, DLG2, KCNIP4	290	173	14527	1.73733	1	0.859475	98.7259
GOTERM_MF_FAT	GO:0005267~potassium channel activity	4	0.892857	0.440835	KCNU1, KCNJ4, KCNB2, KCNIP4	315	120	15478	1.63788	1	0.959941	99.9866
GOTERM_BP_FAT	GO:0071804~cellular potassium ion transport	5	1.11607	0.486943	KCNU1, KCNJ4, KCNB2, NEDD4, KCNIP4	330	182	16650	1.38611	1	0.987787	99.9996
GOTERM_BP_FAT	GO:0071805~potassium ion transmembrane transport	5	1.11607	0.486943	KCNU1, KCNJ4, KCNB2, NEDD4, KCNIP4	330	182	16650	1.38611	1	0.987787	99.9996
GOTERM_MF_FAT	GO:0005249~voltage-gated potassium channel activity	3	0.669643	0.541937	KCNU1, KCNJ4, KCNB2	315	89	15478	1.65629	1	0.976977	99.9994
GOTERM_BP_FAT	GO:2001257~regulation of cation channel activity	3	0.669643	0.551397	SLMAP, PLA2G6, PDE4D	330	93	16650	1.62757	1	0.99159	100
GOTERM_MF_FAT	GO:0015079~potassium ion transmembrane transporter activity	4	0.892857	0.59885	KCNU1, KCNJ4, KCNB2, KCNIP4	315	152	15478	1.29307	1	0.985125	99.9999
GOTERM_BP_FAT	GO:0006813~potassium ion transport	5	1.11607	0.606181	KCNU1, KCNJ4, KCNB2, NEDD4, KCNIP4	330	212	16650	1.18997	1	0.99445	100
GOTERM_BP_FAT	GO:1904062~regulation of cation transmembrane transport	5	1.11607	0.609887	NEDD4, SLMAP, PLA2G6, PDE4D, KCNIP4	330	213	16650	1.18438	1	0.994546	100
GOTERM_BP_FAT	GO:0010959~regulation of metal ion transport	7	1.5625	0.614706	NEDD4, SLMAP, CNTN1, PLA2G6, PDE4D, NKAIN3, KCNIP4	330	322	16650	1.09684	1	0.994763	100
GOTERM_BP_FAT	GO:0015672~monovalent inorganic cation transport	10	2.23214	0.625601	KCNU1, SLC2A13, KCNJ4, SLC4A10, KCNB2, NEDD4, SLMAP, CNTN1, TMCO3, KCNIP4	330	486	16650	1.03816	1	0.995231	100
GOTERM_BP_FAT	GO:0034765~regulation of ion transmembrane transport	8	1.78571	0.659564	KCNU1, KCNJ4, KCNB2, NEDD4, SLMAP, PLA2G6, PDE4D, KCNIP4	330	392	16650	1.02968	1	0.996343	100
GOTERM_CC_FAT	GO:0034702~ion channel complex	6	1.33929	0.676244	KCNU1, KCNJ4, KCNB2, PDE4D, DLG2, KCNIP4	290	286	14527	1.0509	1	0.973826	100
GOTERM_BP_FAT	GO:0034762~regulation of transmembrane transport	8	1.78571	0.694842	KCNU1, KCNJ4, KCNB2, NEDD4, SLMAP, PLA2G6, PDE4D, KCNIP4	330	406	16650	0.994178	1	0.997292	100
GOTERM_BP_FAT	GO:0032412~regulation of ion transmembrane transporter activity	4	0.892857	0.711409	NEDD4, SLMAP, PLA2G6, PDE4D	330	185	16650	1.09091	1	0.99771	100
GOTERM_BP_FAT	GO:0098662~inorganic cation transmembrane transport	12	2.67857	0.714549	KCNU1, KCNJ4, SLC4A10, KCNB2, NEDD4, ATP2C1, SLMAP, PLA2G6, SLC39A6, PDE4D, TMCO3, KCNIP4	330	635	16650	0.953472	1	0.99775	100
GOTERM_BP_FAT	GO:0034220~ion transmembrane transport	18	4.01786	0.719468	GRIK1, KCNB2, PDE4D, KCNIP4, KCNU1, KCNJ4, TSC22D3, SLC4A10, SLC1A3, NEDD4, ATP2C1, WWP1, SLMAP, UBC, UNC80, PLA2G6, SLC39A6, TMCO3	330	963	16650	0.943076	1	0.997778	100
GOTERM_MF_FAT	GO:0015077~monovalent inorganic cation transmembrane transporter activity	7	1.5625	0.725138	KCNU1, KCNJ4, SLC1A3, KCNB2, TMCO3, SLC28A1, KCNIP4	315	353	15478	0.974378	1	0.995172	100
GOTERM_BP_FAT	GO:0022898~regulation of transmembrane transporter activity	4	0.892857	0.72819	NEDD4, SLMAP, PLA2G6, PDE4D	330	190	16650	1.0622	1	0.997962	100
GOTERM_MF_FAT	GO:0022832~voltage-gated channel activity	4	0.892857	0.741349	KCNU1, KCNJ4, KCNB2, KCNIP4	315	189	15478	1.03993	1	0.996134	100
GOTERM_MF_FAT	GO:0005244~voltage-gated ion channel activity	4	0.892857	0.741349	KCNU1, KCNJ4, KCNB2, KCNIP4	315	189	15478	1.03993	1	0.996134	100
GOTERM_MF_FAT	GO:0022843~voltage-gated cation channel activity	3	0.669643	0.75548	KCNU1, KCNJ4, KCNB2	315	133	15478	1.10834	1	0.996648	100
GOTERM_BP_FAT	GO:0006814~sodium ion transport	4	0.892857	0.756459	SLC4A10, NEDD4, SLMAP, CNTN1	330	199	16650	1.01416	1	0.99853	100
GOTERM_MF_FAT	GO:0046873~metal ion transmembrane transporter activity	8	1.78571	0.756712	KCNU1, KCNJ4, SLC1A3, KCNB2, ATP2C1, SLC39A6, SLC28A1, KCNIP4	315	422	15478	0.931498	1	0.996619	100
GOTERM_BP_FAT	GO:0043269~regulation of ion transport	10	2.23214	0.770395	KCNU1, KCNJ4, KCNB2, NEDD4, SLMAP, CNTN1, PLA2G6, PDE4D, NKAIN3, KCNIP4	330	554	16650	0.910732	1	0.998738	100
GOTERM_BP_FAT	GO:0032409~regulation of transporter activity	4	0.892857	0.771116	NEDD4, SLMAP, PLA2G6, PDE4D	330	204	16650	0.989305	1	0.998737	100
GOTERM_CC_FAT	GO:1902495~transmembrane transporter complex	6	1.33929	0.776123	KCNU1, KCNJ4, KCNB2, PDE4D, DLG2, KCNIP4	290	324	14527	0.92765	1	0.988364	100
GOTERM_CC_FAT	GO:1990351~transporter complex	6	1.33929	0.789509	KCNU1, KCNJ4, KCNB2, PDE4D, DLG2, KCNIP4	290	330	14527	0.910784	1	0.989191	100
GOTERM_MF_FAT	GO:0008324~cation transmembrane transporter activity	11	2.45536	0.806468	KCNU1, SLC2A13, KCNJ4, SLC1A3, SLC45A4, KCNB2, ATP2C1, SLC39A6, TMCO3, SLC28A1, KCNIP4	315	616	15478	0.877438	1	0.997917	100
GOTERM_BP_FAT	GO:0098655~cation transmembrane transport	12	2.67857	0.825337	KCNU1, KCNJ4, SLC4A10, KCNB2, NEDD4, ATP2C1, SLMAP, PLA2G6, SLC39A6, PDE4D, TMCO3, KCNIP4	330	703	16650	0.861244	1	0.999444	100
GOTERM_MF_FAT	GO:0022890~inorganic cation transmembrane transporter activity	9	2.00893	0.829441	KCNU1, KCNJ4, SLC1A3, KCNB2, ATP2C1, SLC39A6, TMCO3, SLC28A1, KCNIP4	315	518	15478	0.853723	1	0.998491	100
GOTERM_BP_FAT	GO:0098660~inorganic ion transmembrane transport	12	2.67857	0.853253	KCNU1, KCNJ4, SLC4A10, KCNB2, NEDD4, ATP2C1, SLMAP, PLA2G6, SLC39A6, PDE4D, TMCO3, KCNIP4	330	725	16650	0.83511	1	0.999689	100
GOTERM_BP_FAT	GO:0055085~transmembrane transport	22	4.91071	0.878968	SLC2A13, GRIK1, KCNB2, PDE4D, KCNIP4, KCNU1, SLC25A21, KCNJ4, TSC22D3, SLC4A10, SLC1A3, NEDD4, ATP2C1, WWP1, SLMAP, SLC2A1, UBC, UNC80, PLA2G6, SLC39A6, TMCO3, SLC28A1	330	1322	16650	0.839637	1	0.999812	100
GOTERM_BP_FAT	GO:0030001~metal ion transport	13	2.90179	0.885629	KCNB2, PDE4D, NKAIN3, KCNIP4, KCNU1, KCNJ4, SLC4A10, ATP2C1, NEDD4, SLMAP, CNTN1, PLA2G6, SLC39A6	330	814	16650	0.805785	1	0.999845	100
GOTERM_BP_FAT	GO:0006811~ion transport	24	5.35714	0.896173	SLC2A13, GRIK1, KCNB2, PDE4D, NKAIN3, KCNIP4, KCNU1, SLC25A21, KCNJ4, TSC22D3, SLC4A10, SLC1A3, NEDD4, ATP2C1, WWP1, SLMAP, SLC2A1, UBC, CNTN1, UNC80, PLA2G6, SLC39A6, SLCO3A1, TMCO3	330	1458	16650	0.830527	1	0.999881	100
GOTERM_MF_FAT	GO:0022836~gated channel activity	5	1.11607	0.910437	KCNU1, KCNJ4, GRIK1, KCNB2, KCNIP4	315	334	15478	0.735576	1	0.999775	100
GOTERM_BP_FAT	GO:0006812~cation transport	15	3.34821	0.91978	SLC2A13, KCNB2, PDE4D, NKAIN3, KCNIP4, KCNU1, KCNJ4, SLC4A10, NEDD4, ATP2C1, SLMAP, CNTN1, PLA2G6, SLC39A6, TMCO3	330	975	16650	0.776224	1	0.99995	100
GOTERM_MF_FAT	GO:0005261~cation channel activity	4	0.892857	0.949925	KCNU1, KCNJ4, KCNB2, KCNIP4	315	306	15478	0.642307	1	0.999963	100
GOTERM_MF_FAT	GO:0005216~ion channel activity	5	1.11607	0.976299	KCNU1, KCNJ4, GRIK1, KCNB2, KCNIP4	315	429	15478	0.572687	1	0.999996	100
GOTERM_MF_FAT	GO:0022838~substrate-specific channel activity	5	1.11607	0.981307	KCNU1, KCNJ4, GRIK1, KCNB2, KCNIP4	315	445	15478	0.552096	1	0.999998	100
GOTERM_BP_FAT	GO:0051049~regulation of transport	25	5.58036	0.987801	SRCIN1, SYT5, NFKB1, NKAIN3, SYT7, PTEN, KCNIP4, KCNU1, SLMAP, SLC2A1, TBC1D1, INSR, DAB2IP, KCNB2, PDE4D, FGF21, PCLO, ADPRH, ANXA2, KCNJ4, NEDD4, ITGB1BP1, PLA2G6, CNTN1, SYTL1	330	1796	16650	0.702318	1	1	100
GOTERM_MF_FAT	GO:0015267~channel activity	5	1.11607	0.988661	KCNU1, KCNJ4, GRIK1, KCNB2, KCNIP4	315	478	15478	0.51398	1	0.999999	100
GOTERM_MF_FAT	GO:0022803~passive transmembrane transporter activity	5	1.11607	0.988833	KCNU1, KCNJ4, GRIK1, KCNB2, KCNIP4	315	479	15478	0.512907	1	0.999999	100
Annotation Cluster 146	Enrichment Score: 0.1863870538223209
Category	Term	Count	%	PValue	Genes	List Total	Pop Hits	Pop Total	Fold Enrichment	Bonferroni	Benjamini	FDR
GOTERM_BP_FAT	GO:0033108~mitochondrial respiratory chain complex assembly	4	0.892857	0.262815	IMMP2L, AIFM1, COA1, NDUFA10	330	90	16650	2.24242	1	0.961045	99.6601
GOTERM_BP_FAT	GO:0097031~mitochondrial respiratory chain complex I biogenesis	3	0.669643	0.354549	AIFM1, COA1, NDUFA10	330	63	16650	2.4026	1	0.975349	99.9715
GOTERM_BP_FAT	GO:0010257~NADH dehydrogenase complex assembly	3	0.669643	0.354549	AIFM1, COA1, NDUFA10	330	63	16650	2.4026	1	0.975349	99.9715
GOTERM_BP_FAT	GO:0032981~mitochondrial respiratory chain complex I assembly	3	0.669643	0.354549	AIFM1, COA1, NDUFA10	330	63	16650	2.4026	1	0.975349	99.9715
GOTERM_CC_FAT	GO:0098798~mitochondrial protein complex	5	1.11607	0.430133	MINOS1, IMMP2L, MINOS1-NBL1, DLAT, NDUFA10	290	168	14527	1.49087	1	0.916884	99.969
GOTERM_CC_FAT	GO:0098800~inner mitochondrial membrane protein complex	4	0.892857	0.495366	MINOS1, IMMP2L, MINOS1-NBL1, NDUFA10	290	133	14527	1.50656	1	0.931877	99.9946
GOTERM_CC_FAT	GO:0044455~mitochondrial membrane part	5	1.11607	0.573518	MINOS1, IMMP2L, MINOS1-NBL1, COA1, NDUFA10	290	202	14527	1.23993	1	0.956978	99.9995
GOTERM_CC_FAT	GO:0005743~mitochondrial inner membrane	8	1.78571	0.872139	MINOS1, SLC25A21, IMMP2L, MINOS1-NBL1, AIFM1, DNAJC11, COA1, NDUFA10	290	499	14527	0.803096	1	0.996673	100
GOTERM_CC_FAT	GO:0019866~organelle inner membrane	8	1.78571	0.930481	MINOS1, SLC25A21, IMMP2L, MINOS1-NBL1, AIFM1, DNAJC11, COA1, NDUFA10	290	557	14527	0.71947	1	0.999218	100
GOTERM_CC_FAT	GO:0031966~mitochondrial membrane	9	2.00893	0.96808	MINOS1, SLC25A21, IMMP2L, CISD1, MINOS1-NBL1, AIFM1, DNAJC11, COA1, NDUFA10	290	691	14527	0.652443	1	0.999836	100
GOTERM_CC_FAT	GO:0005635~nuclear envelope	5	1.11607	0.976579	PGRMC2, LMNA, TSGA10, PLCB1, MYOF	290	438	14527	0.571839	1	0.999909	100
GOTERM_CC_FAT	GO:0005740~mitochondrial envelope	9	2.00893	0.980251	MINOS1, SLC25A21, IMMP2L, CISD1, MINOS1-NBL1, AIFM1, DNAJC11, COA1, NDUFA10	290	732	14527	0.615899	1	0.999931	100
GOTERM_CC_FAT	GO:0044429~mitochondrial part	12	2.67857	0.989999	MINOS1, SLC25A21, IMMP2L, CISD1, MINOS1-NBL1, AIFM1, DNAJC11, COA1, DLAT, IARS2, NDUFA10, ETFA	290	990	14527	0.607189	1	0.999985	100
GOTERM_CC_FAT	GO:0005739~mitochondrion	23	5.13393	0.991655	ACOX2, CYP1A1, MINOS1-NBL1, AIFM1, COA1, NFKB1, IARS2, DLAT, NDUFA10, PTEN, SLC25A21, MINOS1, PFDN2, IMMP2L, PPM1E, CISD1, DNAJC11, TGM2, PLA2G6, BRINP3, SPATA5, WWOX, ETFA	290	1700	14527	0.67773	1	0.999989	100
GOTERM_CC_FAT	GO:0031967~organelle envelope	14	3.125	0.992697	MINOS1-NBL1, AIFM1, COA1, LMNA, NDUFA10, SLC25A21, MINOS1, IMMP2L, CISD1, DNAJC11, PGRMC2, TSGA10, PLCB1, MYOF	290	1149	14527	0.61036	1	0.999992	100
GOTERM_CC_FAT	GO:0031975~envelope	14	3.125	0.993094	MINOS1-NBL1, AIFM1, COA1, LMNA, NDUFA10, SLC25A21, MINOS1, IMMP2L, CISD1, DNAJC11, PGRMC2, TSGA10, PLCB1, MYOF	290	1154	14527	0.607715	1	0.999993	100
Annotation Cluster 147	Enrichment Score: 0.18609878621006576
Category	Term	Count	%	PValue	Genes	List Total	Pop Hits	Pop Total	Fold Enrichment	Bonferroni	Benjamini	FDR
GOTERM_BP_FAT	GO:0061097~regulation of protein tyrosine kinase activity	3	0.669643	0.361702	RAP2B, SRCIN1, EPGN	330	64	16650	2.36506	1	0.976861	99.9768
GOTERM_MF_FAT	GO:0004714~transmembrane receptor protein tyrosine kinase activity	3	0.669643	0.38114	IGF1R, DDR2, INSR	315	65	15478	2.26784	1	0.946042	99.9365
GOTERM_MF_FAT	GO:0019199~transmembrane receptor protein kinase activity	3	0.669643	0.498029	IGF1R, DDR2, INSR	315	82	15478	1.79768	1	0.970435	99.9974
GOTERM_BP_FAT	GO:0046777~protein autophosphorylation	5	1.11607	0.662856	RAP2B, IGF1R, RAP2A, DDR2, INSR	330	228	16650	1.10646	1	0.996448	100
GOTERM_BP_FAT	GO:0030335~positive regulation of cell migration	8	1.78571	0.667325	IGF1R, SEMA6A, DAB2IP, ITGB1BP1, SEMA3A, DDR2, INSR, GLI1	330	395	16650	1.02186	1	0.996541	100
GOTERM_BP_FAT	GO:0018108~peptidyl-tyrosine phosphorylation	7	1.5625	0.690957	RAP2B, IGF1R, SRCIN1, EPGN, CNTN1, DDR2, INSR	330	349	16650	1.01198	1	0.997197	100
GOTERM_BP_FAT	GO:0018212~peptidyl-tyrosine modification	7	1.5625	0.696191	RAP2B, IGF1R, SRCIN1, EPGN, CNTN1, DDR2, INSR	330	351	16650	1.00622	1	0.997313	100
GOTERM_BP_FAT	GO:2000147~positive regulation of cell motility	8	1.78571	0.702086	IGF1R, SEMA6A, DAB2IP, ITGB1BP1, SEMA3A, DDR2, INSR, GLI1	330	409	16650	0.986886	1	0.997491	100
GOTERM_BP_FAT	GO:0051272~positive regulation of cellular component movement	8	1.78571	0.727677	IGF1R, SEMA6A, DAB2IP, ITGB1BP1, SEMA3A, DDR2, INSR, GLI1	330	420	16650	0.961039	1	0.997958	100
GOTERM_BP_FAT	GO:0050730~regulation of peptidyl-tyrosine phosphorylation	4	0.892857	0.803367	RAP2B, SRCIN1, EPGN, CNTN1	330	216	16650	0.934343	1	0.999221	100
GOTERM_BP_FAT	GO:0050731~positive regulation of peptidyl-tyrosine phosphorylation	3	0.669643	0.838238	SRCIN1, EPGN, CNTN1	330	164	16650	0.922949	1	0.999566	100
GOTERM_BP_FAT	GO:0018193~peptidyl-amino acid modification	20	4.46429	0.857768	RAP2B, SRCIN1, FUT8, KANSL3, PDE4D, MECOM, DDR2, PADI1, RPTOR, DPY30, IGF1R, MAST1, EPGN, FKBP14, TGM2, SPRED2, CNTN1, UGGT2, INSR, BCAR3	330	1185	16650	0.851554	1	0.999718	100
GOTERM_MF_FAT	GO:0004713~protein tyrosine kinase activity	3	0.669643	0.883305	IGF1R, DDR2, INSR	315	180	15478	0.818942	1	0.99947	100
Annotation Cluster 148	Enrichment Score: 0.18586818752081954
Category	Term	Count	%	PValue	Genes	List Total	Pop Hits	Pop Total	Fold Enrichment	Bonferroni	Benjamini	FDR
GOTERM_CC_FAT	GO:0005667~transcription factor complex	7	1.5625	0.590854	ATF7IP, TAF2, E2F6, NFATC4, RBPJ, NR5A2, WWOX	290	312	14527	1.12388	1	0.956469	99.9997
GOTERM_CC_FAT	GO:0090575~RNA polymerase II transcription factor complex	3	0.669643	0.631619	TAF2, NR5A2, WWOX	290	107	14527	1.40448	1	0.96521	99.9999
GOTERM_CC_FAT	GO:0044798~nuclear transcription factor complex	3	0.669643	0.742096	TAF2, NR5A2, WWOX	290	132	14527	1.13848	1	0.983963	100
Annotation Cluster 149	Enrichment Score: 0.1820617651073153
Category	Term	Count	%	PValue	Genes	List Total	Pop Hits	Pop Total	Fold Enrichment	Bonferroni	Benjamini	FDR
GOTERM_BP_FAT	GO:0000209~protein polyubiquitination	7	1.5625	0.380545	LNPEP, RNF114, NEDD4, UBE3A, ANAPC4, PSMD1, UBC	330	252	16650	1.40152	1	0.980194	99.9867
GOTERM_MF_FAT	GO:0016874~ligase activity	10	2.23214	0.463199	RNF114, YARS, GCLC, NEDD4, UBE3A, WWP1, FAAH, IARS2, ZNRF3, MYCBP2	315	409	15478	1.20138	1	0.966497	99.9928
GOTERM_MF_FAT	GO:0061630~ubiquitin protein ligase activity	5	1.11607	0.573095	RNF114, NEDD4, UBE3A, WWP1, ZNRF3	315	198	15478	1.24082	1	0.981943	99.9998
GOTERM_MF_FAT	GO:0061659~ubiquitin-like protein ligase activity	5	1.11607	0.592841	RNF114, NEDD4, UBE3A, WWP1, ZNRF3	315	203	15478	1.21026	1	0.984823	99.9999
GOTERM_BP_FAT	GO:0016567~protein ubiquitination	15	3.34821	0.663976	GCLC, UBE3A, ANAPC4, PTEN, ZNRF3, MYCBP2, HSPBP1, LNPEP, RNF114, RNF208, NEDD4, WWP1, PSMD1, UBC, KLHL13	330	770	16650	0.982881	1	0.996484	100
GOTERM_MF_FAT	GO:0004842~ubiquitin-protein transferase activity	8	1.78571	0.75022	RNF114, RNF208, NEDD4, UBE3A, WWP1, ANAPC4, KLHL13, ZNRF3	315	419	15478	0.938167	1	0.99645	100
GOTERM_MF_FAT	GO:0019787~ubiquitin-like protein transferase activity	8	1.78571	0.79122	RNF114, RNF208, NEDD4, UBE3A, WWP1, ANAPC4, KLHL13, ZNRF3	315	439	15478	0.895426	1	0.997455	100
GOTERM_BP_FAT	GO:0070647~protein modification by small protein conjugation or removal	18	4.01786	0.814179	GCLC, USP3, UBE3A, ANAPC4, PTEN, ZNRF3, MYCBP2, HSPBP1, LNPEP, RNF114, RNF208, NEDD4, WWP1, PSMD1, UBC, KLHL13, OTUD7B, USP15	330	1032	16650	0.880021	1	0.999343	100
GOTERM_BP_FAT	GO:0032446~protein modification by small protein conjugation	15	3.34821	0.841401	GCLC, UBE3A, ANAPC4, PTEN, ZNRF3, MYCBP2, HSPBP1, LNPEP, RNF114, RNF208, NEDD4, WWP1, PSMD1, UBC, KLHL13	330	887	16650	0.853234	1	0.999598	100
GOTERM_CC_FAT	GO:0000151~ubiquitin ligase complex	4	0.892857	0.934722	NEDD4, WWP1, ANAPC4, KLHL13	290	294	14527	0.681539	1	0.999285	100
Annotation Cluster 150	Enrichment Score: 0.17912756329393867
Category	Term	Count	%	PValue	Genes	List Total	Pop Hits	Pop Total	Fold Enrichment	Bonferroni	Benjamini	FDR
GOTERM_CC_FAT	GO:0000786~nucleosome	3	0.669643	0.631619	HIST1H2BO, HIST1H3J, HIST1H2AM	290	107	14527	1.40448	1	0.96521	99.9999
GOTERM_CC_FAT	GO:0044815~DNA packaging complex	3	0.669643	0.661106	HIST1H2BO, HIST1H3J, HIST1H2AM	290	113	14527	1.32991	1	0.971724	100
GOTERM_CC_FAT	GO:0032993~protein-DNA complex	4	0.892857	0.69485	HIST1H2BO, POLD4, HIST1H3J, HIST1H2AM	290	179	14527	1.1194	1	0.976147	100
Annotation Cluster 151	Enrichment Score: 0.1784340511210325
Category	Term	Count	%	PValue	Genes	List Total	Pop Hits	Pop Total	Fold Enrichment	Bonferroni	Benjamini	FDR
GOTERM_BP_FAT	GO:0071333~cellular response to glucose stimulus	3	0.669643	0.579895	GCLC, PLA2G6, FGF21	330	98	16650	1.54453	1	0.993188	100
GOTERM_BP_FAT	GO:0071326~cellular response to monosaccharide stimulus	3	0.669643	0.596347	GCLC, PLA2G6, FGF21	330	101	16650	1.49865	1	0.993975	100
GOTERM_BP_FAT	GO:0071331~cellular response to hexose stimulus	3	0.669643	0.596347	GCLC, PLA2G6, FGF21	330	101	16650	1.49865	1	0.993975	100
GOTERM_BP_FAT	GO:0009749~response to glucose	4	0.892857	0.632303	GCLC, PLA2G6, FGF21, PTEN	330	164	16650	1.2306	1	0.995488	100
GOTERM_BP_FAT	GO:0071322~cellular response to carbohydrate stimulus	3	0.669643	0.64279	GCLC, PLA2G6, FGF21	330	110	16650	1.37603	1	0.995824	100
GOTERM_BP_FAT	GO:0009746~response to hexose	4	0.892857	0.65241	GCLC, PLA2G6, FGF21, PTEN	330	169	16650	1.19419	1	0.996092	100
GOTERM_BP_FAT	GO:0001678~cellular glucose homeostasis	3	0.669643	0.662041	GCLC, PLA2G6, FGF21	330	114	16650	1.32775	1	0.996429	100
GOTERM_BP_FAT	GO:0034284~response to monosaccharide	4	0.892857	0.671721	GCLC, PLA2G6, FGF21, PTEN	330	174	16650	1.15987	1	0.996676	100
GOTERM_BP_FAT	GO:0009743~response to carbohydrate	4	0.892857	0.753439	GCLC, PLA2G6, FGF21, PTEN	330	198	16650	1.01928	1	0.998455	100
GOTERM_BP_FAT	GO:0042593~glucose homeostasis	4	0.892857	0.771116	GCLC, PLA2G6, FGF21, INSR	330	204	16650	0.989305	1	0.998737	100
GOTERM_BP_FAT	GO:0033500~carbohydrate homeostasis	4	0.892857	0.771116	GCLC, PLA2G6, FGF21, INSR	330	204	16650	0.989305	1	0.998737	100
Annotation Cluster 152	Enrichment Score: 0.1767718114763341
Category	Term	Count	%	PValue	Genes	List Total	Pop Hits	Pop Total	Fold Enrichment	Bonferroni	Benjamini	FDR
GOTERM_BP_FAT	GO:0006260~DNA replication	7	1.5625	0.51233	POLD4, IGF1R, ZRANB3, RTEL1-TNFRSF6B, INSR, RTEL1, GLI1	330	290	16650	1.21787	1	0.98944	99.9998
GOTERM_BP_FAT	GO:0032200~telomere organization	4	0.892857	0.558123	POLD4, HIST1H3J, RTEL1-TNFRSF6B, RTEL1	330	147	16650	1.37291	1	0.992041	100
GOTERM_BP_FAT	GO:0000723~telomere maintenance	3	0.669643	0.746029	POLD4, RTEL1-TNFRSF6B, RTEL1	330	134	16650	1.12958	1	0.998339	100
GOTERM_BP_FAT	GO:0060249~anatomical structure homeostasis	5	1.11607	0.920191	POLD4, NELL2, MKKS, RTEL1-TNFRSF6B, RTEL1	330	352	16650	0.716684	1	0.99995	100
Annotation Cluster 153	Enrichment Score: 0.171161360113597
Category	Term	Count	%	PValue	Genes	List Total	Pop Hits	Pop Total	Fold Enrichment	Bonferroni	Benjamini	FDR
GOTERM_BP_FAT	GO:2001235~positive regulation of apoptotic signaling pathway	5	1.11607	0.464642	DAB2IP, PLA2G6, NFATC4, PTEN, WWOX	330	177	16650	1.42527	1	0.986579	99.9991
GOTERM_BP_FAT	GO:0097190~apoptotic signaling pathway	11	2.45536	0.720012	DAB2IP, GCLC, AIFM1, KRT8, LMNA, MNT, PLA2G6, NFATC4, SGMS1, PTEN, WWOX	330	583	16650	0.951973	1	0.997782	100
GOTERM_BP_FAT	GO:0097193~intrinsic apoptotic signaling pathway	4	0.892857	0.916342	DAB2IP, AIFM1, NFATC4, WWOX	330	279	16650	0.723363	1	0.999942	100
Annotation Cluster 154	Enrichment Score: 0.17061896025382872
Category	Term	Count	%	PValue	Genes	List Total	Pop Hits	Pop Total	Fold Enrichment	Bonferroni	Benjamini	FDR
GOTERM_CC_FAT	GO:0061695~transferase complex, transferring phosphorus-containing groups	6	1.33929	0.568689	TAF2, POLD4, INTS4, INTS10, INSR, CDK14	290	253	14527	1.18798	1	0.956194	99.9994
GOTERM_CC_FAT	GO:0016591~DNA-directed RNA polymerase II, holoenzyme	3	0.669643	0.616143	TAF2, INTS4, INTS10	290	104	14527	1.44499	1	0.963511	99.9999
GOTERM_CC_FAT	GO:0000428~DNA-directed RNA polymerase complex	3	0.669643	0.73442	TAF2, INTS4, INTS10	290	130	14527	1.15599	1	0.983332	100
GOTERM_CC_FAT	GO:0055029~nuclear DNA-directed RNA polymerase complex	3	0.669643	0.73442	TAF2, INTS4, INTS10	290	130	14527	1.15599	1	0.983332	100
GOTERM_CC_FAT	GO:0030880~RNA polymerase complex	3	0.669643	0.742096	TAF2, INTS4, INTS10	290	132	14527	1.13848	1	0.983963	100
Annotation Cluster 155	Enrichment Score: 0.1702479838638596
Category	Term	Count	%	PValue	Genes	List Total	Pop Hits	Pop Total	Fold Enrichment	Bonferroni	Benjamini	FDR
GOTERM_BP_FAT	GO:0031667~response to nutrient levels	9	2.00893	0.547703	GCLC, CYP1A1, AIFM1, SLC2A1, MKKS, FGF21, PTEN, RPTOR, GBA	330	404	16650	1.12399	1	0.991409	100
GOTERM_BP_FAT	GO:0071496~cellular response to external stimulus	6	1.33929	0.576426	GCLC, AIFM1, SLC2A1, NFKB1, RPTOR, GBA	330	257	16650	1.17793	1	0.993054	100
GOTERM_BP_FAT	GO:0031669~cellular response to nutrient levels	4	0.892857	0.611408	AIFM1, SLC2A1, RPTOR, GBA	330	159	16650	1.2693	1	0.994625	100
GOTERM_BP_FAT	GO:0009991~response to extracellular stimulus	9	2.00893	0.631367	GCLC, CYP1A1, AIFM1, SLC2A1, MKKS, FGF21, PTEN, RPTOR, GBA	330	435	16650	1.04389	1	0.99549	100
GOTERM_BP_FAT	GO:0070997~neuron death	6	1.33929	0.642572	GCLC, ATN1, AIFM1, FGF21, CITED1, GBA	330	277	16650	1.09288	1	0.99584	100
GOTERM_BP_FAT	GO:0031668~cellular response to extracellular stimulus	4	0.892857	0.721571	AIFM1, SLC2A1, RPTOR, GBA	330	188	16650	1.0735	1	0.997826	100
GOTERM_BP_FAT	GO:1901214~regulation of neuron death	5	1.11607	0.750794	GCLC, AIFM1, FGF21, CITED1, GBA	330	257	16650	0.981606	1	0.998412	100
GOTERM_BP_FAT	GO:0051402~neuron apoptotic process	4	0.892857	0.771116	GCLC, ATN1, AIFM1, CITED1	330	204	16650	0.989305	1	0.998737	100
GOTERM_BP_FAT	GO:0043523~regulation of neuron apoptotic process	3	0.669643	0.89748	GCLC, AIFM1, CITED1	330	193	16650	0.784268	1	0.999885	100
Annotation Cluster 156	Enrichment Score: 0.16634173974047345
Category	Term	Count	%	PValue	Genes	List Total	Pop Hits	Pop Total	Fold Enrichment	Bonferroni	Benjamini	FDR
GOTERM_BP_FAT	GO:0006909~phagocytosis	7	1.5625	0.468218	ACTR3, MYO7A, TGM2, PLA2G6, SYT7, ARPC5, PTEN	330	277	16650	1.27502	1	0.986808	99.9992
GOTERM_BP_FAT	GO:0038093~Fc receptor signaling pathway	6	1.33929	0.527605	ACTR3, PSMD1, UBC, PLA2G6, NFKB1, ARPC5	330	243	16650	1.24579	1	0.990392	99.9999
GOTERM_BP_FAT	GO:0038096~Fc-gamma receptor signaling pathway involved in phagocytosis	3	0.669643	0.718885	ACTR3, PLA2G6, ARPC5	330	127	16650	1.19184	1	0.997787	100
GOTERM_BP_FAT	GO:0002433~immune response-regulating cell surface receptor signaling pathway involved in phagocytosis	3	0.669643	0.718885	ACTR3, PLA2G6, ARPC5	330	127	16650	1.19184	1	0.997787	100
GOTERM_BP_FAT	GO:0002431~Fc receptor mediated stimulatory signaling pathway	3	0.669643	0.730804	ACTR3, PLA2G6, ARPC5	330	130	16650	1.16434	1	0.998011	100
GOTERM_BP_FAT	GO:0038094~Fc-gamma receptor signaling pathway	3	0.669643	0.734681	ACTR3, PLA2G6, ARPC5	330	131	16650	1.15545	1	0.998103	100
GOTERM_BP_FAT	GO:0002252~immune effector process	6	1.33929	0.999155	ACTR3, SHB, COLEC10, PLA2G6, ARPC5, GBP3	330	742	16650	0.407988	1	1	100
Annotation Cluster 157	Enrichment Score: 0.16173949508562574
Category	Term	Count	%	PValue	Genes	List Total	Pop Hits	Pop Total	Fold Enrichment	Bonferroni	Benjamini	FDR
GOTERM_BP_FAT	GO:0033135~regulation of peptidyl-serine phosphorylation	4	0.892857	0.424048	PLCL1, PDE4D, RPTOR, BCAR3	330	120	16650	1.68182	1	0.983585	99.9966
GOTERM_BP_FAT	GO:0018105~peptidyl-serine phosphorylation	4	0.892857	0.867657	MAST1, PDE4D, RPTOR, BCAR3	330	246	16650	0.820399	1	0.999763	100
GOTERM_BP_FAT	GO:0018209~peptidyl-serine modification	4	0.892857	0.88924	MAST1, PDE4D, RPTOR, BCAR3	330	259	16650	0.779221	1	0.999863	100
Annotation Cluster 158	Enrichment Score: 0.15699679510724313
Category	Term	Count	%	PValue	Genes	List Total	Pop Hits	Pop Total	Fold Enrichment	Bonferroni	Benjamini	FDR
GOTERM_CC_FAT	GO:0022625~cytosolic large ribosomal subunit	4	0.892857	0.153284	COA1, RPL8, RPL26, RPL5	290	68	14527	2.94665	1	0.824171	90.8367
GOTERM_BP_FAT	GO:0006612~protein targeting to membrane	6	1.33929	0.322662	KCNB2, ITGB1BP1, RPL8, RPL26, RPL5, ANXA2	330	190	16650	1.5933	1	0.970144	99.9299
GOTERM_CC_FAT	GO:0044445~cytosolic part	7	1.5625	0.341516	STX12, COA1, RPL8, PSMD1, RPL26, ENO2, RPL5	290	239	14527	1.46716	1	0.889847	99.7525
GOTERM_CC_FAT	GO:0015934~large ribosomal subunit	4	0.892857	0.417786	COA1, RPL8, RPL26, RPL5	290	118	14527	1.69807	1	0.920296	99.9578
GOTERM_BP_FAT	GO:0046700~heterocycle catabolic process	10	2.23214	0.428471	CYP1A1, AIFM1, PDE1A, RPL8, RPL26, IDO2, RPL5, PDE4D, PDE8A, ZCCHC6	330	411	16650	1.2276	1	0.98403	99.997
GOTERM_CC_FAT	GO:0022626~cytosolic ribosome	4	0.892857	0.454564	COA1, RPL8, RPL26, RPL5	290	125	14527	1.60298	1	0.918004	99.9835
GOTERM_BP_FAT	GO:0019439~aromatic compound catabolic process	10	2.23214	0.459508	CYP1A1, AIFM1, PDE1A, RPL8, RPL26, IDO2, RPL5, PDE4D, PDE8A, ZCCHC6	330	423	16650	1.19278	1	0.986469	99.999
GOTERM_BP_FAT	GO:1901361~organic cyclic compound catabolic process	10	2.23214	0.520857	CYP1A1, AIFM1, PDE1A, RPL8, RPL26, IDO2, RPL5, PDE4D, PDE8A, ZCCHC6	330	445	16650	1.13381	1	0.990006	99.9999
GOTERM_BP_FAT	GO:0006614~SRP-dependent cotranslational protein targeting to membrane	3	0.669643	0.568657	RPL8, RPL26, RPL5	330	96	16650	1.5767	1	0.992699	100
GOTERM_BP_FAT	GO:0044270~cellular nitrogen compound catabolic process	9	2.00893	0.586491	AIFM1, PDE1A, RPL8, RPL26, IDO2, RPL5, PDE4D, PDE8A, ZCCHC6	330	418	16650	1.08634	1	0.993513	100
GOTERM_BP_FAT	GO:0006613~cotranslational protein targeting to membrane	3	0.669643	0.607045	RPL8, RPL26, RPL5	330	103	16650	1.46955	1	0.994479	100
GOTERM_BP_FAT	GO:0045047~protein targeting to ER	3	0.669643	0.612313	RPL8, RPL26, RPL5	330	104	16650	1.45542	1	0.994657	100
GOTERM_BP_FAT	GO:0034655~nucleobase-containing compound catabolic process	8	1.78571	0.627463	AIFM1, PDE1A, RPL8, RPL26, RPL5, PDE4D, PDE8A, ZCCHC6	330	380	16650	1.0622	1	0.995293	100
GOTERM_BP_FAT	GO:0072599~establishment of protein localization to endoplasmic reticulum	3	0.669643	0.632846	RPL8, RPL26, RPL5	330	108	16650	1.40152	1	0.995461	100
GOTERM_MF_FAT	GO:0003735~structural constituent of ribosome	5	1.11607	0.662745	SLC25A21, COA1, RPL8, RPL26, RPL5	315	222	15478	1.10668	1	0.990745	100
GOTERM_BP_FAT	GO:0000184~nuclear-transcribed mRNA catabolic process, nonsense-mediated decay	3	0.669643	0.702306	RPL8, RPL26, RPL5	330	123	16650	1.2306	1	0.997482	100
GOTERM_BP_FAT	GO:0070972~protein localization to endoplasmic reticulum	3	0.669643	0.722906	RPL8, RPL26, RPL5	330	128	16650	1.18253	1	0.997845	100
GOTERM_CC_FAT	GO:0044391~ribosomal subunit	4	0.892857	0.729369	COA1, RPL8, RPL26, RPL5	290	189	14527	1.06017	1	0.982779	100
GOTERM_BP_FAT	GO:0090150~establishment of protein localization to membrane	7	1.5625	0.738276	KCNB2, ITGB1BP1, RPL8, PLS1, RPL26, RPL5, ANXA2	330	368	16650	0.959733	1	0.998208	100
GOTERM_CC_FAT	GO:0005840~ribosome	5	1.11607	0.744891	COA1, RPL8, RPL26, RPL5, RPS19BP1	290	253	14527	0.989982	1	0.984083	100
GOTERM_BP_FAT	GO:0000956~nuclear-transcribed mRNA catabolic process	4	0.892857	0.776774	RPL8, RPL26, RPL5, ZCCHC6	330	206	16650	0.9797	1	0.998812	100
GOTERM_BP_FAT	GO:0006402~mRNA catabolic process	4	0.892857	0.815637	RPL8, RPL26, RPL5, ZCCHC6	330	221	16650	0.913204	1	0.999345	100
GOTERM_BP_FAT	GO:0006401~RNA catabolic process	4	0.892857	0.872943	RPL8, RPL26, RPL5, ZCCHC6	330	249	16650	0.810515	1	0.999787	100
GOTERM_BP_FAT	GO:0019083~viral transcription	3	0.669643	0.87593	RPL8, RPL26, RPL5	330	181	16650	0.836263	1	0.999797	100
GOTERM_BP_FAT	GO:0019058~viral life cycle	7	1.5625	0.889478	EPS15, WWP1, RPL8, RPL26, UBC, RPL5, NR5A2	330	455	16650	0.776224	1	0.999863	100
GOTERM_BP_FAT	GO:0006413~translational initiation	3	0.669643	0.890715	RPL8, RPL26, RPL5	330	189	16650	0.800866	1	0.999868	100
GOTERM_BP_FAT	GO:0019080~viral gene expression	3	0.669643	0.895827	RPL8, RPL26, RPL5	330	192	16650	0.788352	1	0.999881	100
GOTERM_BP_FAT	GO:0044033~multi-organism metabolic process	3	0.669643	0.927034	RPL8, RPL26, RPL5	330	214	16650	0.707307	1	0.999964	100
GOTERM_BP_FAT	GO:0043043~peptide biosynthetic process	9	2.00893	0.955547	SLC25A21, TRNAU1AP, YARS, GCLC, COA1, RPL8, RPL26, RPL5, IARS2	330	667	16650	0.680796	1	0.999992	100
GOTERM_BP_FAT	GO:0042254~ribosome biogenesis	4	0.892857	0.963266	RPL8, RPL26, RPL5, PTEN	330	335	16650	0.602442	1	0.999996	100
GOTERM_BP_FAT	GO:0034470~ncRNA processing	5	1.11607	0.963939	INTS4, RPL8, RPL26, RPL5, INTS10	330	411	16650	0.613802	1	0.999996	100
GOTERM_BP_FAT	GO:0006364~rRNA processing	3	0.669643	0.970955	RPL8, RPL26, RPL5	330	269	16650	0.56269	1	0.999998	100
GOTERM_BP_FAT	GO:0006412~translation	8	1.78571	0.972012	SLC25A21, TRNAU1AP, YARS, COA1, RPL8, RPL26, RPL5, IARS2	330	641	16650	0.629698	1	0.999998	100
GOTERM_BP_FAT	GO:0016072~rRNA metabolic process	3	0.669643	0.974236	RPL8, RPL26, RPL5	330	276	16650	0.548419	1	0.999999	100
GOTERM_CC_FAT	GO:0030529~intracellular ribonucleoprotein complex	10	2.23214	0.977173	ERG, COA1, MEX3A, RPL8, TDRD9, RPL26, RPL5, CPSF3, RBM25, RPS19BP1	290	786	14527	0.637317	1	0.999911	100
GOTERM_CC_FAT	GO:1990904~ribonucleoprotein complex	10	2.23214	0.977432	ERG, COA1, MEX3A, RPL8, TDRD9, RPL26, RPL5, CPSF3, RBM25, RPS19BP1	290	787	14527	0.636507	1	0.999909	100
GOTERM_MF_FAT	GO:0003723~RNA binding	24	5.35714	0.983642	RALYL, YARS, COA1, YLPM1, TDRD9, MEX3A, RPL26, IARS2, PRRC2C, RPS19BP1, ANXA2, HEATR6, NSUN7, TRNAU1AP, RPL8, DDX59, PSPC1, UBC, RPL5, CPSF3, ZCCHC6, RBM25, DLG2, PLEC	315	1656	15478	0.712123	1	0.999998	100
GOTERM_BP_FAT	GO:0016071~mRNA metabolic process	7	1.5625	0.992454	RPL8, RPL26, PSPC1, RPL5, CPSF3, ZCCHC6, RBM25	330	672	16650	0.525568	1	1	100
GOTERM_BP_FAT	GO:0006396~RNA processing	10	2.23214	0.994332	INTS4, RPL8, TDRD9, RPL26, PSPC1, RPL5, CPSF3, INTS10, ZCCHC6, RBM25	330	910	16650	0.554446	1	1	100
GOTERM_BP_FAT	GO:0022613~ribonucleoprotein complex biogenesis	4	0.892857	0.996378	RPL8, RPL26, RPL5, PTEN	330	480	16650	0.420455	1	1	100
Annotation Cluster 159	Enrichment Score: 0.1557317206927075
Category	Term	Count	%	PValue	Genes	List Total	Pop Hits	Pop Total	Fold Enrichment	Bonferroni	Benjamini	FDR
GOTERM_BP_FAT	GO:0016049~cell growth	9	2.00893	0.633923	ALCAM, SEMA6A, LAMB2, EMX1, OSGIN1, SEMA3A, SGMS1, APBB2, RPTOR	330	436	16650	1.04149	1	0.995468	100
GOTERM_BP_FAT	GO:0030308~negative regulation of cell growth	4	0.892857	0.66023	SEMA6A, OSGIN1, SEMA3A, APBB2	330	171	16650	1.18022	1	0.996354	100
GOTERM_BP_FAT	GO:0045926~negative regulation of growth	5	1.11607	0.701576	SEMA6A, OSGIN1, SEMA3A, APBB2, PTEN	330	240	16650	1.05114	1	0.997488	100
GOTERM_BP_FAT	GO:0001558~regulation of cell growth	7	1.5625	0.811459	SEMA6A, OSGIN1, PAPPA2, SEMA3A, APBB2, RPTOR, ARHGEF11	330	403	16650	0.876382	1	0.999316	100
Annotation Cluster 160	Enrichment Score: 0.15487002804651587
Category	Term	Count	%	PValue	Genes	List Total	Pop Hits	Pop Total	Fold Enrichment	Bonferroni	Benjamini	FDR
GOTERM_MF_FAT	GO:0008237~metallopeptidase activity	5	1.11607	0.540529	LNPEP, TAF2, CPQ, PAPPA2, ADAMTS3	315	190	15478	1.29307	1	0.977162	99.9993
GOTERM_MF_FAT	GO:0070011~peptidase activity, acting on L-amino acid peptides	13	2.90179	0.778185	TAF2, USP3, CPQ, COLEC10, CAPN2, LNPEP, IMMP2L, PSMD1, OTUD7B, PAPPA2, DPP8, ADAMTS3, USP15	315	708	15478	0.902224	1	0.997294	100
GOTERM_MF_FAT	GO:0008233~peptidase activity	13	2.90179	0.81562	TAF2, USP3, CPQ, COLEC10, CAPN2, LNPEP, IMMP2L, PSMD1, OTUD7B, PAPPA2, DPP8, ADAMTS3, USP15	315	733	15478	0.871452	1	0.998103	100
Annotation Cluster 161	Enrichment Score: 0.15368070639199286
Category	Term	Count	%	PValue	Genes	List Total	Pop Hits	Pop Total	Fold Enrichment	Bonferroni	Benjamini	FDR
GOTERM_BP_FAT	GO:0070555~response to interleukin-1	5	1.11607	0.189049	DAB2IP, GCLC, NFKB1, PLCB1, CITED1	330	114	16650	2.21292	1	0.94153	97.9888
GOTERM_BP_FAT	GO:0071222~cellular response to lipopolysaccharide	4	0.892857	0.567303	DAB2IP, NFKB1, PDE4D, SGMS1	330	149	16650	1.35448	1	0.992667	100
GOTERM_BP_FAT	GO:0071219~cellular response to molecule of bacterial origin	4	0.892857	0.594131	DAB2IP, NFKB1, PDE4D, SGMS1	330	155	16650	1.30205	1	0.993829	100
GOTERM_BP_FAT	GO:0071216~cellular response to biotic stimulus	4	0.892857	0.675488	DAB2IP, NFKB1, PDE4D, SGMS1	330	175	16650	1.15325	1	0.996776	100
GOTERM_BP_FAT	GO:0032496~response to lipopolysaccharide	6	1.33929	0.715648	DAB2IP, CYP1A1, NFKB1, PDE4D, SGMS1, CITED1	330	302	16650	1.00241	1	0.997727	100
GOTERM_BP_FAT	GO:0002237~response to molecule of bacterial origin	6	1.33929	0.751674	DAB2IP, CYP1A1, NFKB1, PDE4D, SGMS1, CITED1	330	316	16650	0.957998	1	0.998426	100
GOTERM_BP_FAT	GO:0009617~response to bacterium	8	1.78571	0.916192	DAB2IP, CYP1A1, PLA2G6, NFKB1, PDE4D, SGMS1, RBPJ, CITED1	330	544	16650	0.741979	1	0.999942	100
GOTERM_BP_FAT	GO:0051707~response to other organism	10	2.23214	0.98494	DAB2IP, CYP1A1, KRT8, PLA2G6, NFKB1, PDE4D, SGMS1, RBPJ, GBP3, CITED1	330	829	16650	0.608619	1	1	100
GOTERM_BP_FAT	GO:0043207~response to external biotic stimulus	10	2.23214	0.98494	DAB2IP, CYP1A1, KRT8, PLA2G6, NFKB1, PDE4D, SGMS1, RBPJ, GBP3, CITED1	330	829	16650	0.608619	1	1	100
GOTERM_BP_FAT	GO:0009607~response to biotic stimulus	10	2.23214	0.991071	DAB2IP, CYP1A1, KRT8, PLA2G6, NFKB1, PDE4D, SGMS1, RBPJ, GBP3, CITED1	330	873	16650	0.577944	1	1	100
GOTERM_BP_FAT	GO:0045087~innate immune response	5	1.11607	0.99996	DAB2IP, PSMD1, UBC, NFKB1, CITED1	330	836	16650	0.301762	1	1	100
Annotation Cluster 162	Enrichment Score: 0.15262593177478942
Category	Term	Count	%	PValue	Genes	List Total	Pop Hits	Pop Total	Fold Enrichment	Bonferroni	Benjamini	FDR
GOTERM_MF_FAT	GO:0004843~thiol-dependent ubiquitin-specific protease activity	3	0.669643	0.485	USP3, OTUD7B, USP15	315	80	15478	1.84262	1	0.969176	99.9962
GOTERM_MF_FAT	GO:0036459~thiol-dependent ubiquitinyl hydrolase activity	3	0.669643	0.703294	USP3, OTUD7B, USP15	315	120	15478	1.22841	1	0.994046	100
GOTERM_MF_FAT	GO:0101005~ubiquitinyl hydrolase activity	3	0.669643	0.703294	USP3, OTUD7B, USP15	315	120	15478	1.22841	1	0.994046	100
GOTERM_MF_FAT	GO:0019783~ubiquitin-like protein-specific protease activity	3	0.669643	0.748001	USP3, OTUD7B, USP15	315	131	15478	1.12526	1	0.996424	100
GOTERM_BP_FAT	GO:0016579~protein deubiquitination	3	0.669643	0.756958	USP3, OTUD7B, USP15	330	137	16650	1.10484	1	0.998533	100
GOTERM_MF_FAT	GO:0008234~cysteine-type peptidase activity	4	0.892857	0.775071	USP3, OTUD7B, CAPN2, USP15	315	200	15478	0.98273	1	0.997304	100
GOTERM_BP_FAT	GO:0070646~protein modification by small protein removal	3	0.669643	0.811497	USP3, OTUD7B, USP15	330	154	16650	0.982881	1	0.999311	100
Annotation Cluster 163	Enrichment Score: 0.1497049659829326
Category	Term	Count	%	PValue	Genes	List Total	Pop Hits	Pop Total	Fold Enrichment	Bonferroni	Benjamini	FDR
GOTERM_BP_FAT	GO:1903828~negative regulation of cellular protein localization	5	1.11607	0.295379	DAB2IP, LEPROTL1, ITGB1BP1, OTUD7B, ASTN2	330	139	16650	1.81491	1	0.967724	99.8536
GOTERM_BP_FAT	GO:1903827~regulation of cellular protein localization	8	1.78571	0.93092	STX6, DAB2IP, LEPROTL1, ITGB1BP1, PLS1, OTUD7B, LMNA, ASTN2	330	562	16650	0.718214	1	0.999968	100
GOTERM_BP_FAT	GO:0060341~regulation of cellular localization	12	2.67857	0.943915	STX6, DAB2IP, LEPROTL1, NEDD4, ITGB1BP1, PLS1, OTUD7B, LMNA, PLA2G6, PDE4D, ASTN2, PTEN	330	834	16650	0.725965	1	0.999984	100
GOTERM_BP_FAT	GO:0032880~regulation of protein localization	13	2.90179	0.970408	STX6, DAB2IP, LEPROTL1, SRCIN1, ITGB1BP1, SLC2A1, PLS1, OTUD7B, LMNA, PLA2G6, SYT7, ASTN2, TBC1D1	330	962	16650	0.681818	1	0.999998	100
Annotation Cluster 164	Enrichment Score: 0.1441344263031058
Category	Term	Count	%	PValue	Genes	List Total	Pop Hits	Pop Total	Fold Enrichment	Bonferroni	Benjamini	FDR
GOTERM_BP_FAT	GO:0030031~cell projection assembly	9	2.00893	0.589201	RAP2B, RAP2A, FNBP1L, ATXN10, TSGA10, MKKS, C5ORF42, TBC1D1, CDC42EP3	330	419	16650	1.08375	1	0.993708	100
GOTERM_BP_FAT	GO:0010927~cellular component assembly involved in morphogenesis	6	1.33929	0.693475	FNBP1L, ATXN10, KRT8, MKKS, C5ORF42, PHLDB2	330	294	16650	1.02968	1	0.99729	100
GOTERM_BP_FAT	GO:0060271~cilium morphogenesis	5	1.11607	0.722639	ACTR3, FNBP1L, ATXN10, MKKS, C5ORF42	330	247	16650	1.02135	1	0.99785	100
GOTERM_BP_FAT	GO:0042384~cilium assembly	4	0.892857	0.776774	FNBP1L, ATXN10, MKKS, C5ORF42	330	206	16650	0.9797	1	0.998812	100
GOTERM_BP_FAT	GO:0044782~cilium organization	4	0.892857	0.829501	FNBP1L, ATXN10, MKKS, C5ORF42	330	227	16650	0.889067	1	0.999487	100
Annotation Cluster 165	Enrichment Score: 0.14078033576044488
Category	Term	Count	%	PValue	Genes	List Total	Pop Hits	Pop Total	Fold Enrichment	Bonferroni	Benjamini	FDR
GOTERM_BP_FAT	GO:0051091~positive regulation of sequence-specific DNA binding transcription factor activity	5	1.11607	0.679389	TRAPPC9, UBC, NFKB1, DDR2, PTEN	330	233	16650	1.08272	1	0.996881	100
GOTERM_BP_FAT	GO:0051092~positive regulation of NF-kappaB transcription factor activity	3	0.669643	0.742293	TRAPPC9, UBC, NFKB1	330	133	16650	1.13807	1	0.998285	100
GOTERM_BP_FAT	GO:0051090~regulation of sequence-specific DNA binding transcription factor activity	7	1.5625	0.749834	DAB2IP, TRAPPC9, LRRC1, UBC, NFKB1, DDR2, PTEN	330	373	16650	0.946868	1	0.998406	100
Annotation Cluster 166	Enrichment Score: 0.13996354298648409
Category	Term	Count	%	PValue	Genes	List Total	Pop Hits	Pop Total	Fold Enrichment	Bonferroni	Benjamini	FDR
GOTERM_BP_FAT	GO:0051321~meiotic cell cycle	6	1.33929	0.478284	ACTR3, RAD51B, NUMA1, TDRD9, PLCB1, INSR	330	230	16650	1.31621	1	0.987009	99.9995
GOTERM_BP_FAT	GO:0007126~meiotic nuclear division	4	0.892857	0.693844	ACTR3, RAD51B, TDRD9, PLCB1	330	180	16650	1.12121	1	0.997268	100
GOTERM_BP_FAT	GO:1903046~meiotic cell cycle process	4	0.892857	0.724896	ACTR3, RAD51B, TDRD9, PLCB1	330	189	16650	1.06782	1	0.997888	100
GOTERM_BP_FAT	GO:0000280~nuclear division	9	2.00893	0.893908	ACTR3, RAD51B, NUMA1, EPGN, ANAPC4, TDRD9, KLHL13, PLCB1, INSR	330	583	16650	0.778887	1	0.999876	100
GOTERM_BP_FAT	GO:0048285~organelle fission	9	2.00893	0.928252	ACTR3, RAD51B, NUMA1, EPGN, ANAPC4, TDRD9, KLHL13, PLCB1, INSR	330	622	16650	0.73005	1	0.999965	100
Annotation Cluster 167	Enrichment Score: 0.1384419711132071
Category	Term	Count	%	PValue	Genes	List Total	Pop Hits	Pop Total	Fold Enrichment	Bonferroni	Benjamini	FDR
GOTERM_BP_FAT	GO:0008610~lipid biosynthetic process	16	3.57143	0.25552	ACOX2, CYP1A1, FA2H, FADS2, NFKB1, SGMS1, PTEN, PIGM, PLA2G6, MGLL, INPP4B, CYP2R1, KDSR, PPM1L, LIPC, GBA	330	624	16650	1.29371	1	0.959858	99.5916
GOTERM_CC_FAT	GO:0005789~endoplasmic reticulum membrane	15	3.34821	0.938973	CYP1A1, FAM69A, FA2H, FADS2, SGMS1, KRTCAP2, NOTCH3, PIGM, FAAH, FKBP14, MGLL, KDSR, CYP2R1, PPM1L, EXT1	290	999	14527	0.752149	1	0.999378	100
GOTERM_CC_FAT	GO:0044432~endoplasmic reticulum part	18	4.01786	0.939504	CYP1A1, FAM69A, FA2H, FADS2, SGMS1, CAPN2, KRTCAP2, NOTCH3, PIGM, FAAH, FKBP14, MGLL, PPM1L, CYP2R1, KDSR, LIPC, EXT1, UGGT2	290	1177	14527	0.76608	1	0.999367	100
GOTERM_CC_FAT	GO:0005783~endoplasmic reticulum	26	5.80357	0.948817	FAM69A, CPQ, SGMS1, KCNIP4, PIGM, SLMAP, TGM2, MGLL, SLC39A6, BRINP3, CYP1A1, FA2H, FADS2, KRTCAP2, CAPN2, NOTCH3, TRAPPC9, FAAH, FKBP14, CYP2R1, KDSR, PPM1L, EXT1, UGGT2, LIPC, FAM172A	290	1660	14527	0.784591	1	0.999539	100
GOTERM_CC_FAT	GO:0042175~nuclear outer membrane-endoplasmic reticulum membrane network	15	3.34821	0.949796	CYP1A1, FAM69A, FA2H, FADS2, SGMS1, KRTCAP2, NOTCH3, PIGM, FAAH, FKBP14, MGLL, KDSR, CYP2R1, PPM1L, EXT1	290	1021	14527	0.735942	1	0.999543	100
Annotation Cluster 168	Enrichment Score: 0.13677502635238914
Category	Term	Count	%	PValue	Genes	List Total	Pop Hits	Pop Total	Fold Enrichment	Bonferroni	Benjamini	FDR
GOTERM_BP_FAT	GO:0032606~type I interferon production	3	0.669643	0.632846	ZBTB20, UBC, NFKB1	330	108	16650	1.40152	1	0.995461	100
GOTERM_BP_FAT	GO:0032479~regulation of type I interferon production	3	0.669643	0.652522	ZBTB20, UBC, NFKB1	330	112	16650	1.35146	1	0.996071	100
GOTERM_BP_FAT	GO:0001817~regulation of cytokine production	8	1.78571	0.941417	ZBTB20, OTUD7B, UBC, NFKB1, NFATC4, PDE4D, PLCB1, GBA	330	577	16650	0.699543	1	0.999981	100
Annotation Cluster 169	Enrichment Score: 0.13334326538417632
Category	Term	Count	%	PValue	Genes	List Total	Pop Hits	Pop Total	Fold Enrichment	Bonferroni	Benjamini	FDR
GOTERM_BP_FAT	GO:1901699~cellular response to nitrogen compound	12	2.67857	0.546494	IGF1R, DDC, GCLC, BAIAP2L2, AIFM1, NFKB1, PDE4D, FGF21, CAPN2, PLCB1, INSR, RPTOR	330	558	16650	1.08504	1	0.99145	100
GOTERM_BP_FAT	GO:0071417~cellular response to organonitrogen compound	10	2.23214	0.603287	IGF1R, DDC, GCLC, BAIAP2L2, NFKB1, PDE4D, FGF21, CAPN2, INSR, RPTOR	330	477	16650	1.05775	1	0.994259	100
GOTERM_BP_FAT	GO:1901701~cellular response to oxygen-containing compound	18	4.01786	0.633624	DAB2IP, GCLC, BAIAP2L2, AIFM1, NFKB1, PDE4D, SGMS1, FGF21, CAPN2, RPTOR, IGF1R, NDOR1, PLA2G6, PDE8A, BRINP3, PLCB1, INSR, KDM6B	330	912	16650	0.995813	1	0.99548	100
GOTERM_BP_FAT	GO:0008286~insulin receptor signaling pathway	3	0.669643	0.657308	IGF1R, BAIAP2L2, INSR	330	113	16650	1.3395	1	0.996241	100
GOTERM_BP_FAT	GO:0071375~cellular response to peptide hormone stimulus	6	1.33929	0.69631	IGF1R, GCLC, BAIAP2L2, NFKB1, FGF21, INSR	330	295	16650	1.02619	1	0.997299	100
GOTERM_BP_FAT	GO:0032868~response to insulin	5	1.11607	0.713749	IGF1R, GCLC, BAIAP2L2, INSR, CITED1	330	244	16650	1.0339	1	0.997768	100
GOTERM_BP_FAT	GO:0032869~cellular response to insulin stimulus	4	0.892857	0.721571	IGF1R, GCLC, BAIAP2L2, INSR	330	188	16650	1.0735	1	0.997826	100
GOTERM_BP_FAT	GO:1901653~cellular response to peptide	6	1.33929	0.749218	IGF1R, GCLC, BAIAP2L2, NFKB1, FGF21, INSR	330	315	16650	0.961039	1	0.9984	100
GOTERM_BP_FAT	GO:0043434~response to peptide hormone	7	1.5625	0.815109	IGF1R, GCLC, BAIAP2L2, NFKB1, FGF21, INSR, CITED1	330	405	16650	0.872054	1	0.999342	100
GOTERM_BP_FAT	GO:0010243~response to organonitrogen compound	13	2.90179	0.860114	IGF1R, DDC, GCLC, BAIAP2L2, AIFM1, NFKB1, PDE4D, FGF21, CAPN2, PTEN, INSR, CITED1, RPTOR	330	789	16650	0.831317	1	0.999728	100
GOTERM_BP_FAT	GO:1901652~response to peptide	7	1.5625	0.875724	IGF1R, GCLC, BAIAP2L2, NFKB1, FGF21, INSR, CITED1	330	444	16650	0.795455	1	0.999797	100
GOTERM_BP_FAT	GO:1901700~response to oxygen-containing compound	24	5.35714	0.901486	DAB2IP, GCLC, BAIAP2L2, CYP1A1, AIFM1, NFKB1, PDE4D, SGMS1, FGF21, CAPN2, PTEN, RPTOR, CITED1, IGF1R, NDOR1, KRT8, PPP2CB, PLA2G6, PDE8A, BRINP3, PLCB1, INSR, KDM6B, GBA	330	1466	16650	0.825995	1	0.999899	100
GOTERM_BP_FAT	GO:1901698~response to nitrogen compound	14	3.125	0.90468	DDC, GCLC, BAIAP2L2, AIFM1, PDE4D, NFKB1, FGF21, CAPN2, PTEN, RPTOR, CITED1, IGF1R, PLCB1, INSR	330	895	16650	0.789233	1	0.999909	100
Annotation Cluster 170	Enrichment Score: 0.13315010156315896
Category	Term	Count	%	PValue	Genes	List Total	Pop Hits	Pop Total	Fold Enrichment	Bonferroni	Benjamini	FDR
GOTERM_MF_FAT	GO:1901681~sulfur compound binding	6	1.33929	0.512706	GPC4, ACOX2, NAV2, ADAMTS3, LIPC, ETFA	315	233	15478	1.26532	1	0.972771	99.9984
GOTERM_MF_FAT	GO:0008201~heparin binding	3	0.669643	0.839047	NAV2, ADAMTS3, LIPC	315	160	15478	0.92131	1	0.998742	100
GOTERM_MF_FAT	GO:0005539~glycosaminoglycan binding	3	0.669643	0.926606	NAV2, ADAMTS3, LIPC	315	208	15478	0.7087	1	0.999883	100
Annotation Cluster 171	Enrichment Score: 0.1314213610709271
Category	Term	Count	%	PValue	Genes	List Total	Pop Hits	Pop Total	Fold Enrichment	Bonferroni	Benjamini	FDR
GOTERM_BP_FAT	GO:0050852~T cell receptor signaling pathway	6	1.33929	0.235432	SHB, PSMD1, UBC, NFKB1, PDE4D, PTEN	330	167	16650	1.81274	1	0.954435	99.3292
GOTERM_BP_FAT	GO:0002429~immune response-activating cell surface receptor signaling pathway	9	2.00893	0.440013	ACTR3, SHB, PSMD1, UBC, PLA2G6, NFKB1, PDE4D, ARPC5, PTEN	330	367	16650	1.2373	1	0.985297	99.998
GOTERM_BP_FAT	GO:0050851~antigen receptor-mediated signaling pathway	6	1.33929	0.471866	SHB, PSMD1, UBC, NFKB1, PDE4D, PTEN	330	228	16650	1.32775	1	0.986766	99.9993
GOTERM_BP_FAT	GO:0038093~Fc receptor signaling pathway	6	1.33929	0.527605	ACTR3, PSMD1, UBC, PLA2G6, NFKB1, ARPC5	330	243	16650	1.24579	1	0.990392	99.9999
GOTERM_BP_FAT	GO:0002768~immune response-regulating cell surface receptor signaling pathway	9	2.00893	0.535124	ACTR3, SHB, PSMD1, UBC, PLA2G6, NFKB1, PDE4D, ARPC5, PTEN	330	399	16650	1.13807	1	0.990732	99.9999
GOTERM_BP_FAT	GO:0002253~activation of immune response	11	2.45536	0.650541	ACTR3, SHB, DAB2IP, PSMD1, COLEC10, UBC, PLA2G6, NFKB1, PDE4D, ARPC5, PTEN	330	550	16650	1.00909	1	0.996009	100
GOTERM_BP_FAT	GO:0002757~immune response-activating signal transduction	10	2.23214	0.654302	ACTR3, SHB, DAB2IP, PSMD1, UBC, PLA2G6, NFKB1, PDE4D, ARPC5, PTEN	330	498	16650	1.01314	1	0.996121	100
GOTERM_BP_FAT	GO:0002764~immune response-regulating signaling pathway	10	2.23214	0.726419	ACTR3, SHB, DAB2IP, PSMD1, UBC, PLA2G6, NFKB1, PDE4D, ARPC5, PTEN	330	531	16650	0.95018	1	0.997928	100
GOTERM_BP_FAT	GO:0002758~innate immune response-activating signal transduction	4	0.892857	0.862179	DAB2IP, PSMD1, UBC, NFKB1	330	243	16650	0.830527	1	0.999742	100
GOTERM_BP_FAT	GO:0050778~positive regulation of immune response	11	2.45536	0.873356	ACTR3, SHB, DAB2IP, PSMD1, COLEC10, UBC, PLA2G6, NFKB1, PDE4D, ARPC5, PTEN	330	684	16650	0.811404	1	0.999788	100
GOTERM_BP_FAT	GO:0002218~activation of innate immune response	4	0.892857	0.874663	DAB2IP, PSMD1, UBC, NFKB1	330	250	16650	0.807273	1	0.999792	100
GOTERM_BP_FAT	GO:0045089~positive regulation of innate immune response	4	0.892857	0.930571	DAB2IP, PSMD1, UBC, NFKB1	330	292	16650	0.691158	1	0.999968	100
GOTERM_BP_FAT	GO:0031349~positive regulation of defense response	5	1.11607	0.95915	DAB2IP, PSMD1, UBC, TGM2, NFKB1	330	402	16650	0.627544	1	0.999994	100
GOTERM_BP_FAT	GO:0045088~regulation of innate immune response	4	0.892857	0.974941	DAB2IP, PSMD1, UBC, NFKB1	330	360	16650	0.560606	1	0.999999	100
GOTERM_BP_FAT	GO:0002684~positive regulation of immune system process	12	2.67857	0.984586	ACTR3, SHB, DAB2IP, PSMD1, COLEC10, UBC, PLA2G6, NFKB1, PDE4D, ARPC5, PTEN, AP3B1	330	960	16650	0.630682	1	1	100
GOTERM_BP_FAT	GO:0050776~regulation of immune response	11	2.45536	0.98744	ACTR3, SHB, DAB2IP, PSMD1, COLEC10, UBC, PLA2G6, NFKB1, PDE4D, ARPC5, PTEN	330	912	16650	0.608553	1	1	100
GOTERM_BP_FAT	GO:0006955~immune response	20	4.46429	0.993146	DAB2IP, IL16, COLEC10, NFKB1, PDE4D, ARPC5, PTEN, CITED1, ALCAM, ACTR3, SHB, IGF1R, NEDD4, PSMD1, UBC, OTUD7B, PLA2G6, DPP8, RBPJ, KDM6B	330	1551	16650	0.650607	1	1	100
GOTERM_BP_FAT	GO:0002682~regulation of immune system process	16	3.57143	0.997198	ZBTB7B, DAB2IP, MINOS1-NBL1, COLEC10, PDE4D, NFKB1, ARPC5, PTEN, ACTR3, SHB, TSC22D3, PSMD1, UBC, PLA2G6, PLCB1, AP3B1	330	1378	16650	0.585829	1	1	100
GOTERM_BP_FAT	GO:0002252~immune effector process	6	1.33929	0.999155	ACTR3, SHB, COLEC10, PLA2G6, ARPC5, GBP3	330	742	16650	0.407988	1	1	100
GOTERM_BP_FAT	GO:0045087~innate immune response	5	1.11607	0.99996	DAB2IP, PSMD1, UBC, NFKB1, CITED1	330	836	16650	0.301762	1	1	100
Annotation Cluster 172	Enrichment Score: 0.11734233418979698
Category	Term	Count	%	PValue	Genes	List Total	Pop Hits	Pop Total	Fold Enrichment	Bonferroni	Benjamini	FDR
GOTERM_BP_FAT	GO:0001655~urogenital system development	7	1.5625	0.608661	NOTCH3, LAMB2, UBE3A, C5ORF42, PTEN, LGR5, CITED1	330	320	16650	1.10369	1	0.994528	100
GOTERM_BP_FAT	GO:0072006~nephron development	3	0.669643	0.76051	NOTCH3, LAMB2, CITED1	330	138	16650	1.09684	1	0.998588	100
GOTERM_BP_FAT	GO:0072001~renal system development	5	1.11607	0.813711	NOTCH3, LAMB2, C5ORF42, LGR5, CITED1	330	283	16650	0.891423	1	0.999341	100
GOTERM_BP_FAT	GO:0001822~kidney development	4	0.892857	0.900907	NOTCH3, LAMB2, C5ORF42, CITED1	330	267	16650	0.755873	1	0.999897	100
Annotation Cluster 173	Enrichment Score: 0.11521522675997965
Category	Term	Count	%	PValue	Genes	List Total	Pop Hits	Pop Total	Fold Enrichment	Bonferroni	Benjamini	FDR
GOTERM_BP_FAT	GO:0032259~methylation	7	1.5625	0.649857	NSUN7, ATF7IP, DPY30, PRDM15, TDRD9, PAXBP1, MECOM	330	334	16650	1.05743	1	0.995996	100
GOTERM_BP_FAT	GO:0016571~histone methylation	3	0.669643	0.734681	DPY30, PAXBP1, MECOM	330	131	16650	1.15545	1	0.998103	100
GOTERM_BP_FAT	GO:0016570~histone modification	8	1.78571	0.770254	DPY30, USP3, KANSL3, KDM4C, PAXBP1, MECOM, USP15, KDM6B	330	440	16650	0.917355	1	0.998743	100
GOTERM_BP_FAT	GO:0043414~macromolecule methylation	5	1.11607	0.774219	ATF7IP, DPY30, TDRD9, PAXBP1, MECOM	330	266	16650	0.948394	1	0.998786	100
GOTERM_BP_FAT	GO:0006479~protein methylation	3	0.669643	0.845565	DPY30, PAXBP1, MECOM	330	167	16650	0.906369	1	0.999629	100
GOTERM_BP_FAT	GO:0008213~protein alkylation	3	0.669643	0.845565	DPY30, PAXBP1, MECOM	330	167	16650	0.906369	1	0.999629	100
Annotation Cluster 174	Enrichment Score: 0.11432265684947593
Category	Term	Count	%	PValue	Genes	List Total	Pop Hits	Pop Total	Fold Enrichment	Bonferroni	Benjamini	FDR
GOTERM_BP_FAT	GO:0032259~methylation	7	1.5625	0.649857	NSUN7, ATF7IP, DPY30, PRDM15, TDRD9, PAXBP1, MECOM	330	334	16650	1.05743	1	0.995996	100
GOTERM_MF_FAT	GO:0008168~methyltransferase activity	4	0.892857	0.824787	NSUN7, DPY30, PRDM15, MECOM	315	219	15478	0.89747	1	0.998382	100
GOTERM_MF_FAT	GO:0016741~transferase activity, transferring one-carbon groups	4	0.892857	0.846979	NSUN7, DPY30, PRDM15, MECOM	315	229	15478	0.85828	1	0.998852	100
Annotation Cluster 175	Enrichment Score: 0.11200128366692047
Category	Term	Count	%	PValue	Genes	List Total	Pop Hits	Pop Total	Fold Enrichment	Bonferroni	Benjamini	FDR
GOTERM_MF_FAT	GO:0008514~organic anion transmembrane transporter activity	3	0.669643	0.510846	SLC25A21, SLC1A3, SLCO3A1	315	84	15478	1.75488	1	0.972869	99.9983
GOTERM_BP_FAT	GO:0015711~organic anion transport	6	1.33929	0.7864	SLC25A21, SLC4A10, SLC1A3, SLC2A1, PLA2G6, SLCO3A1	330	331	16650	0.914584	1	0.998981	100
GOTERM_MF_FAT	GO:0008509~anion transmembrane transporter activity	4	0.892857	0.786409	SLC25A21, SLC4A10, SLC1A3, SLCO3A1	315	204	15478	0.963461	1	0.997525	100
[truncated: 183 more rows]

## Sheet: FXR1_over_STAT1&3_DAVID
DAVID analysis of FXR1-STAT1/3 overlapped ChIP-seq target genes in H358 cells.
Annotation Cluster 1	Enrichment Score: 1.3480779501182854
Category	Term	Count	%	PValue	Genes	List Total	Pop Hits	Pop Total	Fold Enrichment	Bonferroni	Benjamini	FDR
GOTERM_BP_DIRECT	GO:0006367~transcription initiation from RNA polymerase II promoter	7	2.41379	0.0153936	NOTCH3, TAF2, MAML3, HNF4G, RBPJ, NR5A2, NR2F1	222	152	16792	3.4834	1	0.906306	22.2242
GOTERM_BP_DIRECT	GO:0043401~steroid hormone mediated signaling pathway	4	1.37931	0.0391455	PGRMC2, HNF4G, NR5A2, NR2F1	222	57	16792	5.30804	1	0.952515	47.6368
GOTERM_MF_DIRECT	GO:0003707~steroid hormone receptor activity	4	1.37931	0.0399398	PGRMC2, HNF4G, NR5A2, NR2F1	229	56	16881	5.26544	1	0.889308	43.0975
GOTERM_MF_DIRECT	GO:0004879~RNA polymerase II transcription factor activity, ligand-activated sequence-specific DNA binding	3	1.03448	0.0848316	HNF4G, NR5A2, NR2F1	229	36	16881	6.14301	1	0.844575	70.6616
GOTERM_BP_DIRECT	GO:0030522~intracellular receptor signaling pathway	3	1.03448	0.0890481	HNF4G, NR5A2, NR2F1	222	38	16792	5.97155	1	0.996633	77.9321
Annotation Cluster 2	Enrichment Score: 1.1774906115331258
Category	Term	Count	%	PValue	Genes	List Total	Pop Hits	Pop Total	Fold Enrichment	Bonferroni	Benjamini	FDR
GOTERM_BP_DIRECT	GO:0007018~microtubule-based movement	5	1.72414	0.0221022	DNAH14, DNAH17, DNAH2, KIF16B, KIFC3	222	81	16792	4.66911	1	0.916329	30.3793
GOTERM_MF_DIRECT	GO:0003777~microtubule motor activity	5	1.72414	0.02308	DNAH14, DNAH17, DNAH2, KIF16B, KIFC3	229	80	16881	4.60726	0.999853	0.889928	27.6035
GOTERM_CC_DIRECT	GO:0030286~dynein complex	3	1.03448	0.0325384	DNAH14, DNAH17, DNAH2	237	22	18224	10.4856	0.999726	0.745203	34.8965
GOTERM_CC_DIRECT	GO:0005874~microtubule	8	2.75862	0.109865	TRIM55, SHROOM3, DNAH14, TBCD, DNAH17, DNAH2, KIF16B, KIFC3	237	311	18224	1.97799	1	0.83535	77.9092
GOTERM_MF_DIRECT	GO:0016887~ATPase activity	3	1.03448	0.710588	DNAH17, DNAH2, KIFC3	229	183	16881	1.20846	1	0.999412	100
Annotation Cluster 3	Enrichment Score: 0.5036036831216102
Category	Term	Count	%	PValue	Genes	List Total	Pop Hits	Pop Total	Fold Enrichment	Bonferroni	Benjamini	FDR
GOTERM_BP_DIRECT	GO:0045740~positive regulation of DNA replication	3	1.03448	0.105469	IGF1R, INSR, GLI1	222	42	16792	5.40283	1	0.997306	83.5649
GOTERM_BP_DIRECT	GO:0008284~positive regulation of cell proliferation	8	2.75862	0.417837	IGF1R, RAD51B, EPGN, ITGB1BP1, KDM4C, FGF21, INSR, GLI1	222	466	16792	1.29853	1	0.99998	99.9844
GOTERM_BP_DIRECT	GO:0030335~positive regulation of cell migration	3	1.03448	0.699937	IGF1R, INSR, GLI1	222	184	16792	1.23325	1	1	100
Annotation Cluster 4	Enrichment Score: 0.4604217025310494
Category	Term	Count	%	PValue	Genes	List Total	Pop Hits	Pop Total	Fold Enrichment	Bonferroni	Benjamini	FDR
GOTERM_BP_DIRECT	GO:0098609~cell-cell adhesion	6	2.06897	0.28585	NOTCH3, EPS15, DAB2IP, FNBP1L, ANXA2, PLEC	222	271	16792	1.67468	1	0.999892	99.5723
GOTERM_MF_DIRECT	GO:0098641~cadherin binding involved in cell-cell adhesion	6	2.06897	0.357131	NOTCH3, EPS15, DAB2IP, FNBP1L, ANXA2, PLEC	229	290	16881	1.52516	1	0.973499	99.7783
GOTERM_CC_DIRECT	GO:0005913~cell-cell adherens junction	6	2.06897	0.407164	NOTCH3, EPS15, DAB2IP, FNBP1L, ANXA2, PLEC	237	323	18224	1.42838	1	0.936633	99.8868
Annotation Cluster 5	Enrichment Score: 0.4461596075204138
Category	Term	Count	%	PValue	Genes	List Total	Pop Hits	Pop Total	Fold Enrichment	Bonferroni	Benjamini	FDR
GOTERM_MF_DIRECT	GO:0004842~ubiquitin-protein transferase activity	8	2.75862	0.158609	RNF114, RNF208, NEDD4, UBE3A, WWP1, ANAPC4, KLHL13, ZNRF3	229	329	16881	1.79249	1	0.934125	90.8276
GOTERM_MF_DIRECT	GO:0061630~ubiquitin protein ligase activity	5	1.72414	0.246632	RNF114, NEDD4, UBE3A, WWP1, ZNRF3	229	187	16881	1.97102	1	0.957085	98.0111
GOTERM_MF_DIRECT	GO:0016874~ligase activity	5	1.72414	0.491018	RNF114, NEDD4, UBE3A, WWP1, ZNRF3	229	270	16881	1.36511	1	0.991906	99.9912
GOTERM_BP_DIRECT	GO:0016567~protein ubiquitination	4	1.37931	0.854845	NEDD4, WWP1, KLHL13, ZNRF3	222	359	16792	0.842782	1	1	100
Annotation Cluster 6	Enrichment Score: 0.30124044632184516
Category	Term	Count	%	PValue	Genes	List Total	Pop Hits	Pop Total	Fold Enrichment	Bonferroni	Benjamini	FDR
GOTERM_CC_DIRECT	GO:0022625~cytosolic large ribosomal subunit	3	1.03448	0.220044	COA1, RPL8, RPL26	237	68	18224	3.39241	1	0.854272	96.022
GOTERM_MF_DIRECT	GO:0003735~structural constituent of ribosome	4	1.37931	0.579446	SLC25A21, COA1, RPL8, RPL26	229	222	16881	1.32822	1	0.995334	99.9994
GOTERM_BP_DIRECT	GO:0006412~translation	4	1.37931	0.650255	SLC25A21, COA1, RPL8, RPL26	222	253	16792	1.19588	1	1	100
GOTERM_MF_DIRECT	GO:0003723~RNA binding	7	2.41379	0.752372	NSUN7, COA1, DDX59, RPL8, RPL26, CPSF3, DLG2	229	547	16881	0.943351	1	0.99962	100
Annotation Cluster 7	Enrichment Score: 0.07067481076866977
Category	Term	Count	%	PValue	Genes	List Total	Pop Hits	Pop Total	Fold Enrichment	Bonferroni	Benjamini	FDR
GOTERM_MF_DIRECT	GO:0004674~protein serine/threonine kinase activity	5	1.72414	0.750895	MAST1, FPGT-TNNI3K, TRIO, TNNI3K, SIK3	229	376	16881	0.980268	1	0.999651	100
GOTERM_BP_DIRECT	GO:0006468~protein phosphorylation	5	1.72414	0.85434	MAST1, FPGT-TNNI3K, TRIO, TNNI3K, SIK3	222	456	16792	0.829382	1	1	100
GOTERM_MF_DIRECT	GO:0004672~protein kinase activity	3	1.03448	0.956677	FPGT-TNNI3K, TNNI3K, SIK3	229	359	16881	0.616012	1	1	100

## Sheet: FXR1_notOver_STAT1or3
DAVID analysis of FXR1-STAT1/3 non-overlapped ChIP-seq target genes in H358 cells.
Annotation Cluster 1	Enrichment Score: 0.4868077549878743
Category	Term	Count	%	PValue	Genes	List Total	Pop Hits	Pop Total	Fold Enrichment	Bonferroni	Benjamini	FDR
GOTERM_BP_DIRECT	GO:0006351~transcription, DNA-templated	11	12.3596	0.0530436	ATF7IP, ARX, ERG, ZNF33A, IL16, ZNF568, ZNF212, EBF2, CASZ1, LMX1A, COMMD10	50	1955	16792	1.88964	0.999999	0.999999	50.8902
GOTERM_MF_DIRECT	GO:0003677~DNA binding	8	8.98876	0.253877	ERG, ZNF33A, ZNF568, ZNF212, EBF2, CASZ1, MSANTD4, LMX1A	53	1674	16881	1.52215	1	1	96.5677
GOTERM_BP_DIRECT	GO:0006355~regulation of transcription, DNA-templated	7	7.86517	0.272931	ZNF33A, IL16, ZNF568, ZNF212, EBF2, CASZ1, COMMD10	50	1504	16792	1.56309	1	1	98.4371
GOTERM_MF_DIRECT	GO:0046872~metal ion binding	7	7.86517	0.626122	ZNF33A, CISD1, ZNF568, ZNF212, EBF2, CASZ1, ZNF804A	53	2069	16881	1.07761	1	1	99.9988
GOTERM_CC_DIRECT	GO:0005634~nucleus	16	17.9775	0.639634	ATF7IP, ZNF33A, ERG, ZNF568, IL16, TACR3, LMX1A, CTNNA2, COMMD10, ARX, ZNF212, EBF2, CASZ1, MSANTD4, IPMK, CDK14	54	5415	18224	0.997175	1	0.999971	99.9986
GOTERM_MF_DIRECT	GO:0003676~nucleic acid binding	3	3.37079	0.81518	ZNF33A, ZNF568, ZNF212	53	985	16881	0.970079	1	1	100
				p0

## Sheet: FXR1_over_H3K4me3_GSEA_GO
GSEA-GO pathway analysis of FXR1-H3K4me3 overlapped ChIP-seq target genes in H358 cells.
Gene Set Name [# Genes (K)]	Description	# Genes in Overlap (k)	k/K	p-value	FDR q-value	Genes
GO_CENTRAL_NERVOUS_SYSTEM_DEVELOPMENT	The process whose specific outcome is the progression of the central nervous system over time, from its formation to the mature structure. The central nervous system is the core nervous system that serves an integrating and coordinating function. In vertebrates it consists of the brain and spinal cord. In those invertebrates with a central nervous system it typically consists of a brain, cerebral…	39	872	0.0447	7.26e-18	4.29e-14	CTNNA2,PCDH9,MKKS,DAB1,PTEN,SEMA3A,FZD3,DAB2IP,SLC4A10,GLI1,C5orf42,DIXDC1,ATN1,GRIK1,ARID1A,NOTCH3,CCDC141,EXT1,ARX,RBPJ,EMX1,FOXP2,KDM6B,CITED1,PLCB1,FUT10,MACROD2,TRAPPC9,CNTN1,MDGA1,UBE3A,IMMP2L,SPATA5,FA2H,LAMB2,UNC5D,MDGA2,WWP1,NAV2
GO_CELL_PROJECTION	A prolongation or process extending from a cell, e.g. a flagellum or axon.	55	1786	0.0308	1.65e-17	4.87e-14	CTNNA2,PCDH9,MKKS,DAB1,PTEN,SEMA3A,FZD3,DAB2IP,SLC4A10,GLI1,C5orf42,GPHN,SRCIN1,LRRC7,CAPN2,DLG2,ALCAM,SYT7,SYT5,KCNJ4,CNTNAP4,ITGB1BP1,ACTR3,NPHP1,ARPC5,NHS,MYO7A,NUMA1,KIF13B,SEMA6A,SLC1A3,DDC,ATXN10,APBB2,NFKB1,AP3B1,NELL2,RPTOR,TSGA10,STX6,KCNB2,GRM5,IQGAP2,DNAH2,DNAH17,DNAH14,NEDD4,LIPC,CRB1,ANXA2,WWOX,EPS15,MCC,SLC39A6,GLIPR1L1
GO_CELL_JUNCTION	A cellular component that forms a specialized region of connection between two or more cells or between a cell and the extracellular matrix. At a cell junction, anchoring proteins extend through the plasma membrane to link cytoskeletal proteins in one cell to cytoskeletal proteins in neighboring cells or to proteins in the extracellular matrix.	43	1151	0.0374	9.21e-17	1.82e-13	CTNNA2,PCDH9,DIXDC1,ATN1,GRIK1,GPHN,SRCIN1,LRRC7,CAPN2,DLG2,ALCAM,SYT7,SYT5,KCNJ4,CNTNAP4,ITGB1BP1,ACTR3,NPHP1,ARPC5,NHS,PCLO,CADPS,SYN2,SCAMP1,SHROOM3,SLC2A1,KRT8,BAIAP2L2,KIFC3,PHLDB2,TBCD,SYNPO2,PLEC,CLMP,RAP2B,DDR2,TGM2,XIRP2,PTPRR,LSR,RPL5,RPL8,TJP3
GO_NEURON_PART	Any constituent part of a neuron, the basic cellular unit of nervous tissue. A typical neuron consists of a cell body (often called the soma), an axon, and dendrites. Their purpose is to receive, conduct, and transmit impulses in the nervous system.	42	1265	0.0332	1.22e-14	1.81e-11	CTNNA2,PCDH9,MKKS,DAB1,PTEN,SEMA3A,FZD3,DAB2IP,SLC4A10,ARID1A,GPHN,SRCIN1,LRRC7,CAPN2,DLG2,ALCAM,SYT7,SYT5,KCNJ4,CNTNAP4,MYO7A,NUMA1,KIF13B,SEMA6A,SLC1A3,DDC,ATXN10,APBB2,NFKB1,AP3B1,NELL2,RPTOR,TSGA10,STX6,KCNB2,GRM5,PCLO,CADPS,SYN2,SCAMP1,ENO2,SYTL1
GO_HEAD_DEVELOPMENT	The biological process whose specific outcome is the progression of a head from an initial condition to its mature state. The head is the anterior-most division of the body.	31	709	0.0437	3.7e-14	4.38e-11	CTNNA2,PCDH9,MKKS,DAB1,PTEN,SEMA3A,FZD3,DAB2IP,SLC4A10,GLI1,C5orf42,DIXDC1,ARID1A,NOTCH3,CCDC141,EXT1,ARX,RBPJ,EMX1,FOXP2,KDM6B,CITED1,PLCB1,FUT10,MACROD2,TRAPPC9,CNTN1,MDGA1,UBE3A,IMMP2L,SPATA5
GO_CYTOSKELETON	Any of the various filamentous elements that form the internal framework of cells, and typically remain after treatment of the cells with mild detergent to remove membrane constituents and soluble components of the cytoplasm. The term embraces intermediate filaments, microfilaments, microtubules, the microtrabecular lattice, and other structures characterized by a polymeric filamentous nature and…	52	1967	0.0264	6.09e-14	6e-11	CTNNA2,MKKS,DAB1,NOTCH3,CCDC141,GPHN,SRCIN1,LRRC7,CAPN2,ITGB1BP1,ACTR3,NPHP1,ARPC5,MYO7A,NUMA1,KIF13B,IQGAP2,DNAH2,DNAH17,DNAH14,PCLO,SHROOM3,SLC2A1,KRT8,BAIAP2L2,KIFC3,PHLDB2,TBCD,SYNPO2,PLEC,CLMP,PDE4D,NFATC4,LMNA,KIF16B,PLA2G6,FAAH,AK5,TRIP4,CDC42EP3,FNBP1L,ZFYVE26,PPP2CB,DENND2A,PLS1,EML2,MAST1,PTPN4,NDOR1,TRIM55,SLMAP,FILIP1
GO_TISSUE_DEVELOPMENT	The process whose specific outcome is the progression of a tissue over time, from its formation to the mature structure.	44	1518	0.029	2.96e-13	2.5e-10	MKKS,PTEN,SEMA3A,FZD3,GLI1,C5orf42,ARID1A,EXT1,ARX,RBPJ,EMX1,FOXP2,KDM6B,CITED1,FA2H,LAMB2,ITGB1BP1,MYO7A,NUMA1,SEMA6A,NEDD4,SHROOM3,RAP2B,DDR2,TGM2,XIRP2,PDE4D,NFATC4,LMNA,KIF16B,NR5A2,CYP1A1,IPMK,FN3K,RAP2A,ERG,LGR5,EBF2,ZFPM2,BCL9,INSR,ATP2C1,EYS,ZBTB7B
GO_SMALL_MOLECULE_METABOLIC_PROCESS	The chemical reactions and pathways involving small molecules, any low molecular weight, monomeric, non-encoded molecule.	47	1767	0.0266	9.02e-13	6.67e-10	PTEN,EXT1,PLCB1,FUT10,MACROD2,FA2H,GPHN,DLG2,SLC1A3,DDC,LIPC,SLC2A1,ENO2,PDE4D,PLA2G6,FAAH,AK5,NR5A2,CYP1A1,IPMK,FN3K,ACOX2,FUT8,PLCH1,GBA,MGLL,PDE8A,SLC25A21,IDO2,ETFA,FUT1,NMNAT2,PADI1,PDXK,INPP4B,SGMS1,CYP2R1,GLCE,FADS2,DLAT,HS6ST3,KDSR,GCLC,BPNT1,NDUFA10,IARS2,YARS
GO_NEUROGENESIS	Generation of cells within the nervous system.	41	1402	0.0292	1.54e-12	9.76e-10	CTNNA2,DAB1,PTEN,SEMA3A,FZD3,DAB2IP,SLC4A10,DIXDC1,NOTCH3,EXT1,ARX,RBPJ,EMX1,TRAPPC9,CNTN1,MDGA1,FA2H,LAMB2,UNC5D,MDGA2,SRCIN1,LRRC7,ALCAM,MYO7A,KIF13B,SEMA6A,SLC1A3,ATXN10,APBB2,NEDD4,CRB1,PTPRR,NFATC4,RAP2A,ZNF280D,SLITRK3,LRFN5,FRYL,AIFM1,ASTN1,SOX5
GO_NEURON_DIFFERENTIATION	The process in which a relatively unspecialized cell acquires specialized features of a neuron.	32	874	0.0366	1.65e-12	9.76e-10	CTNNA2,DAB1,PTEN,SEMA3A,FZD3,DAB2IP,SLC4A10,NOTCH3,EXT1,ARX,RBPJ,EMX1,TRAPPC9,CNTN1,MDGA1,LAMB2,UNC5D,MDGA2,ALCAM,MYO7A,SEMA6A,SLC1A3,ATXN10,APBB2,NEDD4,CRB1,PTPRR,ZNF280D,SLITRK3,LRFN5,FRYL,AIFM1
GO_FOREBRAIN_DEVELOPMENT	The process whose specific outcome is the progression of the forebrain over time, from its formation to the mature structure. The forebrain is the anterior of the three primary divisions of the developing chordate brain or the corresponding part of the adult brain (in vertebrates, includes especially the cerebral hemispheres, the thalamus, and the hypothalamus and especially in higher vertebrates…	21	357	0.0588	2.23e-12	1.18e-09	PCDH9,MKKS,DAB1,PTEN,SEMA3A,DAB2IP,SLC4A10,GLI1,DIXDC1,ARID1A,NOTCH3,CCDC141,EXT1,ARX,RBPJ,EMX1,FOXP2,KDM6B,PLCB1,FUT10,TRAPPC9
GO_NEURON_PROJECTION	A prolongation or process extending from a nerve cell, e.g. an axon or dendrite.	33	942	0.035	2.39e-12	1.18e-09	CTNNA2,PCDH9,DAB1,PTEN,SEMA3A,FZD3,DAB2IP,SLC4A10,GPHN,SRCIN1,LRRC7,CAPN2,DLG2,ALCAM,SYT7,SYT5,KCNJ4,CNTNAP4,NUMA1,KIF13B,SEMA6A,SLC1A3,DDC,ATXN10,APBB2,NFKB1,AP3B1,NELL2,RPTOR,TSGA10,STX6,KCNB2,GRM5
GO_CELL_DEVELOPMENT	The process whose specific outcome is the progression of the cell over time, from its formation to the mature structure. Cell development does not include the steps involved in committing a cell to a specific fate.	41	1426	0.0288	2.63e-12	1.2e-09	CTNNA2,MKKS,DAB1,PTEN,SEMA3A,FZD3,DAB2IP,SLC4A10,EXT1,ARX,RBPJ,EMX1,CITED1,CNTN1,FA2H,LAMB2,UNC5D,SRCIN1,ALCAM,MYO7A,SEMA6A,SLC1A3,ATXN10,APBB2,NEDD4,CRB1,ANXA2,SHROOM3,KRT8,RAP2B,LSR,PDE4D,NFATC4,LMNA,ERG,LGR5,ZNF280D,SLITRK3,LRFN5,FRYL,INHBE
GO_REGULATION_OF_TRANSCRIPTION_FROM_RNA_POLYMERASE_II_PROMOTER	Any process that modulates the frequency, rate or extent of transcription from an RNA polymerase II promoter.	46	1784	0.0258	4.66e-12	1.97e-09	DAB2IP,GLI1,ATN1,ARID1A,NOTCH3,ARX,RBPJ,FOXP2,KDM6B,CITED1,UBE3A,ITGB1BP1,NFKB1,NEDD4,WWOX,NFATC4,LMNA,NR5A2,ERG,EBF2,ZFPM2,BCL9,ZNF280D,UBC,ELP2,KDM4C,USP15,OTUD7B,NR2F1,HNF4G,MNT,TAF2,SMARCD2,KLF12,ATF7IP,NFAT5,CAMTA1,NPAS3,MAML3,ZNF462,CXXC5,TSC22D3,ZBTB20,E2F6,ZMYM3,ZNF212
GO_ENZYME_BINDING	Interacting selectively and non-covalently with any enzyme.	44	1737	0.0253	2.51e-11	9.91e-09	PTEN,DAB2IP,NOTCH3,PLCB1,SRCIN1,DLG2,ITGB1BP1,KIF13B,DDC,ATXN10,AP3B1,NELL2,RPTOR,IQGAP2,NEDD4,ANXA2,WWOX,CADPS,SLC2A1,PTPRR,SYTL1,PDE4D,LMNA,KIF16B,PLA2G6,TRIP4,CDC42EP3,CYP1A1,INSR,UBC,ELP2,KDM4C,PITPNM3,ANAPC4,PPP6R1,TBC1D1,ADPRH,SPRED2,TMEM127,TRIO,HIST1H2AM,RNF114,RPS19BP1,WDR70
GO_PALLIUM_DEVELOPMENT	The process whose specific outcome is the progression of the pallium over time, from its formation to the mature structure. The pallium is the roof region of the telencephalon.	14	153	0.0915	3.28e-11	1.21e-08	MKKS,DAB1,PTEN,SEMA3A,DAB2IP,DIXDC1,CCDC141,ARX,EMX1,FOXP2,KDM6B,PLCB1,FUT10,TRAPPC9
GO_LIPID_BINDING	Interacting selectively and non-covalently with a lipid.	26	657	0.0396	4.06e-11	1.41e-08	PTEN,DAB2IP,PLCB1,SYT7,SYT5,IQGAP2,LIPC,ANXA2,PCLO,CADPS,BAIAP2L2,SYTL1,KIF16B,FNBP1L,ZFYVE26,NR5A2,INSR,ACOX2,PITPNM3,SNX16,PLEKHA8,MYOF,AGAP1,ZCCHC14,NBEAL1,PGRMC2
GO_CATABOLIC_PROCESS	The chemical reactions and pathways resulting in the breakdown of substances, including the breakdown of carbon compounds with the liberation of energy for use by the cell or organism.	44	1773	0.0248	4.84e-11	1.59e-08	PTEN,DAB2IP,PLCB1,FUT10,UBE3A,WWP1,CAPN2,SLC1A3,NEDD4,LIPC,RPL5,RPL8,ENO2,PDE4D,KIF16B,PLA2G6,FAAH,PPP2CB,CYP1A1,ACOX2,FUT8,PLCH1,GBA,MGLL,PDE8A,SLC25A21,IDO2,ETFA,FUT1,AIFM1,UBC,USP15,OTUD7B,ANAPC4,RPL26,GPC4,ADAMTS3,PSMD1,ZNRF3,LNPEP,PLCXD2,USP3,ZCCHC6,COL6A5
GO_CEREBRAL_CORTEX_DEVELOPMENT	The progression of the cerebral cortex over time from its initial formation until its mature state. The cerebral cortex is the outer layered region of the telencephalon.	12	105	0.1143	6.19e-11	1.93e-08	MKKS,DAB1,SEMA3A,DAB2IP,DIXDC1,CCDC141,ARX,EMX1,FOXP2,PLCB1,FUT10,TRAPPC9
GO_CELLULAR_COMPONENT_MORPHOGENESIS	The process in which cellular structures, including whole cells or cell parts, are generated and organized.	30	900	0.0333	8.22e-11	2.43e-08	CTNNA2,MKKS,PTEN,SEMA3A,FZD3,DAB2IP,C5orf42,EXT1,ARX,RBPJ,EMX1,CITED1,LAMB2,UNC5D,SRCIN1,ALCAM,ACTR3,MYO7A,SEMA6A,SLC1A3,ATXN10,APBB2,SHROOM3,KRT8,FNBP1L,ERG,ZNF280D,SLITRK3,LRFN5,FRYL
[truncated: 80 more rows]

## Sheet: FXR1_notOver_H3K4me3_GSEA_GO
GSEA-GO pathway analysis of FXR1-H3K4me3 non-overlapped ChIP-seq target genes in H358 cells.
Gene Set Name [# Genes (K)]	Description	# Genes in Overlap (k)	k/K	p-value	FDR q-value	Genes
GO_POSITIVE_REGULATION_OF_SMOOTH_MUSCLE_CONTRACTION	Any process that activates or increases the frequency, rate or extent of smooth muscle contraction.	2	30	0.0667	0.000143	0.847	TACR3,MYOCD
[truncated: 3 more rows]

## Sheet: FXR1_overlap_STAT1&3
GO analysis of FXR1-STAT1/3 overlapped ChIP-seq target genes in H358 cells.
[truncated: 101 more rows]

[truncated: 1 more sheets: FXR1_notOverlap_STAT1&3]
