# Supplementary material for: FXR1 regulates transcription and is required for growth of human cancer cells with TP53/FXR2 homozygous deletion
Source: eLife journal article supplement (doi:10.7554/elife.26129), 2017-08-02
Supplement: supp [file elife-26129-supp-v2.zip › elife_poa_e26129_Supplementary_File_5.xlsx]

## Sheet: Sheet1
Table S5: RT-PCR primers for the validation of the putative FXR1 target genes from ChIP-seq.
Chromosome	RefseqID	Gene.Symbol	Gene.Start	Gene.End	F1	Sequence (5' to 3')	Length (bp)	R1	Sequence (5' to 3')	Length (bp)	PCR product size (bp)		F2	Sequence (5' to 3')	Length (bp)	R2	Sequence (5' to 3')	Length (bp)	PCR product size (bp)
chr1	NM_139135	ARID1A	27022521	27108601	ARID1A-F1	TGAAAGACATTGGAACCCCG	20	ARID1A-R1	GACTAGACACCTTGCTGAACC	21	285		ARID1A-F2	CCAAGACAGAATCCAAATCCAAG	23	ARID1A-R2	CACAGACACATAGAGGCGATAG	22	209
chr14	NM_001288802	NFATC4	24838358	24848811	NFATC4-F1	TCCTGTTTTGCCTCTCCTTC	20	NFATC4-R1	TTGACACCTGCTCCGAATC	19	165		NFATC4-F2	CAGTCCTACCCAGAGTTTCAG	21	NFATC4-R2	GGTGAGAAGTCCATGTCAGTG	21	126
chr15	NM_177974	CASC4	44580908	44707959	CASC4-F1	CCTCAAGCAATCATATTCCACATG	24	CASC4-R1	TTAAACGCTGAAGAGGACTGG	21	285		CASC4-F2	TGGGAAAGAACAAATCAAAAGAGG	24	CASC4-R2	TTAAACGCTGAAGAGGACTGG	21	260
chr20	NR_072977	MKKS	10385427	10414887	MKKS-F1	AGAAATGACACTGCCTGGG	19	MKKS-R1	TCGTTGTGAGTCTTGTGTCTG	21	152		MKKS-F2	TGACCTTGGACTGTTTGACTG	21	MKKS-R2	GTAGAACAGGGCTTTGGGAG	20	206
chr20	NM_001009608	SLX4IP	10415950	10604027	SLX4IP-F1	TCGTGGATCTTCATATCTTGCC	22	SLX4IP-R1	GTCAGGGAATACACAGAGTTCAG	23	290		SLX4IP-F2	TGCTGAACTCTGTGTATTCCC	21	SLX4IP-R2	TGCTATCTCTGCAATCACTGAG	22	295
chr11	NM_004200	SYT7	61281187	61348344	SYT7-F1	TCCTCTACCTCCAAGTCCTG	20	SYT7-R1	TACATCAGCCATACCTTCACG	21	283		SYT7-F2	TCAATGAGTCCTTCGCCTTC	20	SYT7-R2	TCATGTCCTTCCAGTGCTTC	20	165
chr1	NM_000157	GBA	155204238	155211069	GBA-F1	AAGTGAAGGGATTTGGAGGG	20	GBA-R1	TGGCAAGGAGTGAAACGG	18	300		GBA-F2	CACAACTTCAGCCTCCCAG	20	GBA-R2	GTATCCACTCAACAGCCCAG	18	300
chr4	NR_104593	CENPU	185615218	185655286	CENPU-F1	CCATTATCCCAGACAGCATCAG	22	CENPU-R1	GAGATATCGGAGACAGCATTCC	23	271		CENPU-F2	CAGAGAAACCAGCTGAGTCTG	21	CENPU-R2	TGATGCTCTAGGTGGGTTTTC	21	277
chr2	NR_103490	E2F6	11584500	11606303	E2F6-F1	GGTTTGGGACATGCTTGATG	20	E2F6-R1	TGACCTCTCCTACTCTTGTGG	21	151		E2F6-F2	AAAAGGTCTGAAGGTGTCGG	20	E2F6-R2	TGAGAACGAGAGCACTTCATG	21	225
chr2	NM_004097	EMX1	73144603	73162020	EMX1-F1	ACCCTCTCCATTTCTACCCC	20	EMX1-R1	GCTTCTGCCGTTTGTACTTTG	21	294		EMX1-F2	AGTCTCAGCCTCTCCGAG	18	EMX1-R2	CGTGGGTTTGTGGTTGC	17	214
chr4	NM_203284	RBPJ	26322428	26436752	RBPJ-F1	AGAGTTTGTGGAAGATGGCG	20	RBPJ-R1	GTAAGTCGTTTAGGTGGAGGC	21	253		RBPJ-F2	ACAAGAGTCTCAACCGTGTG	20	RBPJ-R2	AGTCGATTAAACAGAGCCACC	21	297
chr1	NM_017766	CASZ1	10707262	10856733	CASZ1-F1	TCCAAAACAGACTCCATCACC	21	CASZ1-R1	CTGCTTACTCGTGAACCTCTG	21	222		CASZ1-F2	TTCTAGGACCTGCTACGAGAG	21	CASZ1-R2	GTCTCTTGTCTTCCTCGCTG	20	295
chr5	NR_109824	NR2F1-AS1	92745061	92917026	NR2F1-AS1-F1	TGCAGAATTCAGACATGGAGG	21	NR2F1-AS1-R1	TTTGAAGCAGGTACTCAGTGG	21	123		NR2F1-AS1-F2	TCTCTACAGTCCACTACCTTCC	22	NR2F1-AS1-R2	CTGTGCATGTGAGGGATCTAG	21	198
chr5	NM_005654	NR2F1	92919042	92930315	NR2F1-F1	AGAAGTGCCTCAAAGTGGG	19	NR2F1-R1	TCGCAGATGTTCTCGATGC	19	232		NR2F1-F2	TGCCTCAAAGCCATCGTG	18	NR2F1-R2	CTCCCAGACAGTAACATATCGC	22	272
chr15	NM_173454	PDE8A	85525204	85682372	PDE8A-F1	TGTGCTGATGTGTCCAATCC	20	PDE8A-R1	ATTTCGTCCAGTCCTTTCCAG	21	287		PDE8A-F2	CCTCCAATCCCTACCACAATTC	22	PDE8A-R2	TCACTTCCAGCATTACACAGG	21	190
chr2	NR_047657	KANSL3	97258891	97304116	KANSL3-F1	GTCTGGGATTTCGGGAGTTAG	21	KANSL3-R1	TGGTTTCTAAGGTGGAGTTGC	21	168		KANSL3-F2	ATTGTGGACTTTCTGACTGGAG	22	KANSL3-R2	CAATCTGACTGGACTTCTGGG	21	283
chr2	NM_001113382	FER1L5	97308573	97370624	FER1L5-F1	CGACTCTGTTAGGGATGGTTTAG	23	FER1L5-R1	GTACGGTGTGCTTGAGACTAG	21	280		FER1L5-F2	AGCGACATCTACATCAAAGGG	21	FER1L5-R2	TCAGACAAATCCAGCTCCAG	20	287
chr12	NM_032606	CAPS2	75669758	75723836	CAPS2-F1	CTTCTACTCTTGGCTGGGTC	20	CAPS2-R1	TCGTAAGGTCATCTGTGTTGG	21	282		CAPS2-F2	CACGACTTGATTTGGGAAGC	20	CAPS2-R2	CATTTGTCTGTTGGTGCTGG	20	202
chr12	NM_152779	GLIPR1L1	75728462	75764169	GLIPR1L1-F1	TGGATCTTGGGTCTGTGTTTG	21	GLIPR1L1-R1	CCATGCTTTAGCCATCTTTGC	21	183		GLIPR1L1-F2	GAGAAATGTGTAAAGAACCTCTGC	24	GLIPR1L1-R2	GGTATCAGGCAAGAGTGTAGAAG	23	235
chr8	NM_007013	WWP1	87354993	87480178	WWP1-F1	AGGAGTACAAGAACAGACCAAAG	23	WWP1-R1	AATCTGCCAAGTCAACCTCC	20	134		WWP1-F2	GAACCTGCCGTTTACCTCTAG	21	WWP1-R2	GTCCAAATCCCTCTGTCTCTTC	22	207
chr18	NM_002035	KDSR	60994970	61034506	KDSR-F1	ATTCGGTTTCACAGCCTACTC	21	KDSR-R1	CATGTACCCATCTGAGCCAAG	21	280		KDSR-F2	GGTAAATTGTGCAGGAATGGC	21	KDSR-R2	TGGGTAAGCAACTGTGATGTAG	22	295
chr15	NM_020908	TLE3	70340129	70390256	TLE3-F1	AGATCATGCCTTTCCTGTCAC	21	TLE3-R1	CTTCTCATCCTTCACCGTCAG	21	281		TLE3-F2	CTGACGGTGAAGGATGAGAAG	21	TLE3-R2	CTTGTCCAGCCCATTTTCAG	20	294
chr1	NM_001981	EPS15	51819934	51984995	EPS15-F1	TGGAAGAGTTTGGGAGTTGAG	21	EPS15-R1	GGGCTAGTAAGGTAGAAGGTAAAC	24	296		EPS15-F2	CATTTGGAGGTGGATTTGCTG	21	EPS15-R2	TGGGAAAGGCTGAAATGGATC	21	275
chr19	NM_019113	FGF21	49259343	49261582	FGF21-F1	GAGTCAAGACATCCAGGTTCC	21	FGF21-R1	GCTTCGGACTGGTAAACATTG	21	133		FGF21-F2	ACTGTGGGTTTCTGTGCTG	19	FGF21-R2	GGAACCTGGATGTCTTGACTC	21	269
chr19	NM_001267561	TJP3	3721696	3750811	TJP3-F1	AGAGACAGCGAAGAGTTTGG	20	TJP3-R1	CCCCGTTGATCTGTAGAATGAG	22	127		TJP3-F2	GATGAAGACGGCTATGACTGG	21	TJP3-R2	AAGGTTGTGGGTTCTGTATGG	21	126
chr8	NM_018142	INTS10	19674917	19709586	INTS10-F1	AGACGGATACTTGGCTTTGG	20	INTS10-R1	TGATCTGTGGCTGAGAAATGG	21	132		INTS10-F2	CTATCATGCCATACTGCCTCC	21	INTS10-R2	TTTTCCCACCTTCCTGAGTTC	21	261
chr1	NR_049765	ZBTB7B	154975105	154991001	ZBTB7B-F1	TTGAATACCGCACCCACAG	19	ZBTB7B-R1	CCTACAAAGTCCAGCTCACAC	21	157		ZBTB7B-F2	TTGCACTATTTCCCCTTCCTG	21	ZBTB7B-R2	AATGCTAAGATGAGGCCCAG	20	254
chr17	NM_020877	DNAH2	7623038	7737058	DNAH2-F1	GAAGTCTGAAGAGATGGAGCTG	22	DNAH2-R1	TTGGTAGGATTGCACAGGAAG	21	288		DNAH2-F2	GCCCAAGAGATGTCAGAGAAG	21	DNAH2-R2	CCCGTTGATAGCCTTGGATAG	21	297
chr8	NM_172366	FBXO16	28285925	28347835	FBXO16-F1	ACCAAATGACCCCAGACTTC	20	FBXO16-R1	CTGGAACCTGGATGAGTCATG	21	275		FBXO16-F2	TCCCCTTTATCAGCTTTTCGG	21	FBXO16-R2	CTTAGCCTAGTTCTGTCCTGC	21	248
chr8	NM_152837	SNX16	82711817	82754521	SNX16-F1	AGGTTTTCGACTAGCACTTCC	21	SNX16-R1	GAGCAGTTTCTTTAGTGATTCCATC	25	295		SNX16-F2	CGGAAACAGTGAATTGGGAAG	21	SNX16-R2	CTAGGCTATCAAATGGACCCG	21	291
chr18	NM_012319	SLC39A6	33688493	33709357	SLC39A6-F1	GCCATTCACATTTCCACGATAC	22	SLC39A6-R1	GACAGAACACAGCAACAGAAG	21	285		SLC39A6-F2	CACCATCCTCACAGTCACAG	20	SLC39A6-R2	TCCAAGATACGCCAGCATG	19	297
chr18	NR_040110	ELP2	33709836	33754684	ELP2-F1	CTCCACCCTTCTCAACGATAC	21	ELP2-R1	TGTAACCACTCAGCACCTTC	20	224		ELP2-F2	CCAGATGAAGAGTCAGGAGTTTG	23	ELP2-R2	CGTGGAAAGCATGAGCAATG	20	127
chr6	NM_153487	MDGA1	37600283	37665766	MDGA1-F1	TGTCTGTGAACGAAACTCTGG	21	MDGA1-R1	GGAGTGATCTGGAATGTAGCG	21	283		MDGA1-F2	CAACTACAGACTCAGCATCCG	21	MDGA1-R2	TTCTCATCCTCAAAGTGGCAG	21	255
chr21	NR_027873	PAXBP1	34106209	34144169	PAXBP1-F1	AGATGACGATGAGAAACGCC	20	PAXBP1-R1	CTTATCTGCTCCTGTTCCCATC	22	159		PAXBP1-F2	AGCGTTAGAGTCAAATGTGGG	21	PAXBP1-R2	TGGGCAGGGAGTAAAATCATG	21	164
chr21	NR_024623	C21orf49	34144410	34170016	C21orf49-F1	ACTTTGACCTGAGAATGACCC	21	C21orf49-R1	GATCTCTTTTCCTCTTCCACGG	22	270		C21orf49-F2	TTTGAGATGAAGTCGCCCG	19	C21orf49-R2	CCTGTAATCCCAGCACTTTTG	21	255
chr19	NM_014931	PPP6R1	55741146	55770038	PPP6R1-F1	ACAGCCAACATCACCTTCTC	20	PPP6R1-R1	TCCTCGTCCTCCTCTTCTTC	20	269		PPP6R1-F2	GCAGAACACGGAGAAGGG	18	PPP6R1-R2	AGTGGTCAATGAAGGCAGAG	20	281
chr5	NR_110885	SCAMP1	77656326	77776562	SCAMP1-F1	TGTTCTCCAGTTTTCTCACCC	21	SCAMP1-R1	GGATGGTTTCGATCTCCTGAC	21	181		SCAMP1-F2	GCAAAACCTCAGTCAACATGG	21	SCAMP1-R2	TGCCCCAGTTATGAAATCCTG	21	247
chrX	NM_145813	AIFM1	129263337	129299861	AIFM1-F1	AAGTGATTCAACTCTTCCCCG	21	AIFM1-R1	TGTAGCTCTGCATTTACCCG	20	298		AIFM1-F2	GCACAAGACAACCCCAAATC	20	AIFM1-R2	TGCTCACCGTCCTTAATGATC	21	254
chr19	NM_205835	LSR	35739558	35758867	LSR-F1	ATCGTCATCTGGAAGTACAAGTC	23	LSR-R1	GACCACGGAGCAGTAATACAC	21	297		LSR-F2	CTAAGGTACTTTGGAAGGGACG	22	LSR-R2	AGATGACGATGGGTTGCG	18	283
chr1	NM_006085	BPNT1	220230823	220263195	BPNT1-F1	GAGGAAGTGGATCAAGAGCTG	21	BPNT1-R1	GCCTAAACCTAAAACTCCCCAG	22	291		BPNT1-F2	CTATGAACCCCGATGCTGTG	20	BPNT1-R2	ATAGATTCTGGAACTCGGCTTG	22	280
chr1	NM_018060	IARS2	220267454	220321383	IARS2-F1	CTGTGATAGAACCTGGACTGC	21	IARS2-R1	GTGTATCTGAAGACTCCGCTG	21	288		IARS2-F2	TGGACATCTGGTTTGATAGCG	21	IARS2-R2	AAGGACATCAGCACCATACG	20	299
chr13	NR_110731	LINC01232	100139215	100151560	LINC01232-F1	TGTTTGCTGTCTCATTCCCC	20	LINC01232-R1	AATCTCTAGTGGCTGCGTTAC	21	295		LINC01232-F2	AGACAGAGTAGGGTGAGAGTTC	22	LINC01232-R2	AGCCTCTGGTCCTTTTGTTAC	21	265
chr13	NM_004800	TM9SF2	100153627	100216302	TM9SF2-F1	TGGAGGTGAGAAGTGGAAAAC	21	TM9SF2-R1	TCTGACGTGGAATCTGATTGG	21	257		TM9SF2-F2	CAGATGGACTCTACGGAAGATG	22	TM9SF2-R2	TGTTTTCCACTTCTCACCTCC	21	294
chr1	NM_001031725	DDX59	200613164	200639126	DDX59-F1	TCAGAGAAGTCGCAAATAGAAAGG	24	DDX59-R1	CTGTGGGCTTTACTCGTTTTG	21	274		DDX59-F2	GTTATCATAGCAACCCCTGGG	21	DDX59-R2	TGACGTACATTGGCACAAGG	20	284
chr17	NR_024187	SUZ12P1	29036625	29097068	SUZ12P1-F1	ATAAGGCAAGTTCCCACAGAG	21	SUZ12P1-R1	ATGTCTTTTCCCCATCCTCAC	21	143		SUZ12P1-F2	AGGAAGGGACACGGAGG	17	SUZ12P1-R2	GGTGCTATGAGATTCCGAGTTC	22	198
chr19	NM_031429	RTBDN	12936290	12946242	RTBDN-F1	GCTCTTATCTCAGGTGGACATG	22	RTBDN-R1	AGGATTCGCATTCAGGGC	18	284		RTBDN-F2	TTCCAACTCATGTCTGGCTC	20	RTBDN-R2	GTCCATGTCCACCTGAGATAAG	22	245
chr19	NM_014975	MAST1	12949258	12985766	MAST1-F1	GCTCCCTTCATCTGGCTATG	20	MAST1-R1	CCTCTCCTTGTAGACGTGATTC	22	277		MAST1-F2	TCATCCTCTACGAGTTCCTGG	21	MAST1-R2	GCTAGTGTCATCTTCCGACTC	21	296
chr8	NM_032664	FUT10	33228343	33330664	FUT10-F1	CTCTCAGGGAACGGAAATGG	20	FUT10-R1	CCTATCAACCAGCCACCTTAG	21	290		FUT10-F2	GGGAGACTGGGAGGTTAGG	19	FUT10-R2	AGTTAGTGGCAAGTGGGAATG	21	272
chr19	NM_001193268	EML2	46112657	46148775	EML2-F1	GATCTCAGTGGTCAGCTTCTC	21	EML2-R1	CCAAACCCTAGGACACAAGTAG	22	300		EML2-F2	GTTTCCCTCTCCACCTTACAC	21	EML2-R2	CCAAGGTCCAGAAGTAGATGTG	22	271
chr19	NM_014921	LPHN1	14258548	14316997	LPHN1-F1	CTAGTGGAGGTGTTTGAGAGC	21	LPHN1-R1	GCGCCCAGGATTTAATGTTG	20	298		LPHN1-F2	CCAAAACCATCAAGCAGAACAG	22	LPHN1-R2	TTCCAGAAGGAGCAGTTAGC	20	283
chr17	NM_001080424	KDM6B	7743234	7758118	KDM6B-F1	CCCTCGAAATCCCATCACAG	20	KDM6B-R1	TCCTCATCCTCACTCTCCTTC	21	285		KDM6B-F2	GATACGAGTGGAATGAGGTGAAG	23	KDM6B-R2	TTCTCACTTGTCACGAACAGG	21	280
chr4	NM_021647	MFAP3L	170907747	170947429	MFAP3L-F1	AAGAGGATGAGAAGGAGAGAGG	22	MFAP3L-R1	TCCAGAAGTGAAGATGACGC	20	170		MFAP3L-F2	AAGAGGGTGGACAGTTTGAAG	21	MFAP3L-R2	GCCCCTGATTTTCTTGATATGC	22	275
chr8	NM_001160372	TRAPPC9	140742585	141467861	TRAPPC9-F1	CCCAAAGCCTAGAGAACTATACG	23	TRAPPC9-R1	ACACATCTCCTTGAACCCAC	20	285		TRAPPC9-F2	CGGCTGTGGACTTCAAAATG	20	TRAPPC9-R2	AGCAGTCTGTGATGGTGATG	20	276
chr1	NM_032872	SYTL1	27668482	27680423	SYTL1-F1	TCTGGGCGAAGTTGAAGTG	19	SYTL1-R1	CATTGTACGTAAGTGTCCAGGG	22	255		SYTL1-F2	CTCGGTGTCCAGCCTTAAC	19	SYTL1-R2	AGAGTCTCGTTGAAAACCGG	20	282
chr16	NM_182981	OSGIN1	83986826	83999937	OSGIN1-F1	AACATGAAGTCGGTCCTCAC	20	OSGIN1-R1	ACAAAGTTATGCCCCAGACC	20	275		OSGIN1-F2	TCTGGTATCTGCCTGTCCTAC	21	OSGIN1-R2	ACCGACTTCATGTTTCCCC	19	239
chr1	NR_003109	TRNAU1AP	28879528	28905057	TRNAU1AP-F1	AGCGTGGCAATCCCTAAAG	19	TRNAU1AP-R1	GTCCATCAGAGCGTCATACAG	21	300		TRNAU1AP-F2	CTTCGTCAAAGTCTACCCCTC	21	TRNAU1AP-R2	CTGCCTGTGTTCTGGTCATAG	21	300
chr2	NM_015955	MEMO1	32092893	32235698	MEMO1-F1	CACCAAGATGTCCAACCGAG	20	MEMO1-R1	TGTGAAAGCCAACCTTCTAGC	21	108		MEMO1-F2	TGGCAAGACAGTTCAGTGAG	20	MEMO1-R2	CAGTATCGTGGTAAAGGCTAGG	22	131
chr1	NM_004326	BCL9	147013270	147098020	BCL9-F1	ACTCCAAACGATGACTCTGAC	21	BCL9-R1	CTGGATGTGGAAAGAGACGATAG	23	276		BCL9-F2	CACCTTATACCATGCCTCCAG	21	BCL9-R2	TTGGAGTGAGAAAGTGGCTG	20	298
chr13	NM_015057	MYCBP2	77618791	77901177	MYCBP2-F1	GTCTTGGTTAGGGTATGCTCAG	22	MYCBP2-R1	CAGTACCATCTTGCTCCAGTG	21	107		MYCBP2-F2	TTACCAACAGGATCAAGGGC	20	MYCBP2-R2	TCCAAACAGACCAAGACCAC	20	282
chr22	NM_152868	KCNJ4	38822332	38851205	KCNJ4-F1	GACAACATCTCCTACCGCAG	20	KCNJ4-R1	ACCTAGAGCCACCAGAAGTAG	21	273		KCNJ4-F2	ACTCTCGTCGGACCCTC	17	KCNJ4-R2	AAAAGAGCCAGGAGACAAGG	20	282
chr2	NM_001270436	CDC42EP3	37869024	37899678	CDC42EP3-F1	AGCCAAGACCCCAATTTACC	21	CDC42EP3-R1	TCTCCAAAGACATCGTGCTG	22	159		CDC42EP3-F2	AGGAAACAGGAGCAGGAAATG	18	CDC42EP3-R2	CAAGAACCCCAAACCCAAAG	21	197
chr2	NM_181784	SPRED2	65537984	65659656	SPRED2-F1	CAGGCGTCTAGGTGAACAAG	20	SPRED2-R1	GTTGGATTGGCTTTGGTGTAG	21	283		SPRED2-F2	GTTATGACCAGAGATGACTCCAG	23	SPRED2-R2	ATTGCTTTCCTTACTCCCCTG	21	299
chr12	NM_005269	GLI1	57853933	57866047	GLI1-F1	CTATACAGATCCTAGCTCGCTG	22	GLI1-R1	CATTGCCAGTCATTTCCACAC	21	296		GLI1-F2	CGTGAGCCTGAATCTGTGTATG	22	GLI1-R2	TTTTCGAGGCGTGAGTATGAC	21	272
chr18	NM_194281	INO80C	33048290	33077955	INO80C-F1	GAACCTGAAACAAATCCTCGC	21	INO80C-R1	TTCCACTTCATCTCCCTTTCTG	22	288		INO80C-F2	GGAAGTAACAGCGGAAAGGAAG	22	INO80C-R2	CTAAACTCAGAGGGCACCATT	21	287
chr1	NM_152366	KLHDC9	161068180	161070138	KLHDC9-F1	CTCATGTTCTGTGGTCGGG	19	KLHDC9-R1	AGGCTTAGTGATGTGTCTTGG	21	292		KLHDC9-F2	CTACACATTAAGGCTGGACCC	21	KLHDC9-R2	TGCAAGCTGTTCCATCAAATG	21	241
chr15	NR_046342	USP3	63796709	63886839	USP3-F1	GTCACACTAGCCACATTTCAAG	0	USP3-R1	AGGAGACTCACATTTCAGGTTG	22	300		USP3-F2	TGGTACAGAAAGTCAGAGAACAC	0	USP3-R2	TTCCCATTCCTTAACTCCACG	21	268
chr12	NM_021009	UBC	125396190	125399587	UBC-F1	GCCTTAGAACCCCAGTATCAG	21	UBC-R1	CTTACCAGTCAGAGTCTTCACG	22	291		UBC-F2	TCAGAGGTGGGATGCAAATC	20	UBC-R2	AAGGAAAGTGCAATGAAATTTGTTG	25	281
chr10	NM_000314	PTEN	89623194	89728532	PTEN-F1	AGTCCAGAGCCATTTCCATC	20	PTEN-R1	TTCCTGTATACGCCTTCAAGTC	22	238		PTEN-F2	TGCAGAAAGACTTGAAGGCG	20	PTEN-R2	TTACACCAGTTCGTCCCTTTC	21	287
chr20	NM_024704	KIF16B	16252748	16554079	KIF16B-F1	AGGTGCTGTGATTCTCTTGG	20	KIF16B-R1	CCTTGTCTGATTTCTGCTTTTCC	23	272		KIF16B-F2	TCTCATGCCATCTTCACCATC	21	KIF16B-R2	ACCAAGTCAACACAGAATCCC	21	286
chrX	NM_001144886	CITED1	71521487	71527037	CITED1-F11	CTGCCCTCTTGTAGTCCG	18	CITED1-R11	CACTGCTTTGCGATCTTTCAC	21	278		CITED1-F21	GCCAATTTATCCAACTTCTGCC	22	CITED1-R21	GTTCCATTTGAGGCTACCCC	20	197
chrX	NM_001448	GPC4	132435063	132549205	GPC4-F1	GTGAGCAAGTATACGGAGCAG	21	GPC4-R1	TCAAAATCGAGATCCCCTTGG	21	293		GPC4-F2	AGGAAACGGCAATGAGGATG	20	GPC4-R2	AGTCAAACTCTGAAGGGCAC	20	293
chr17	NM_020310	MNT	2287353	2304258	MNT-F1	GGAACCAGAGAAGTCCACAAC	21	MNT-R1	GTCAATCTCCAGTACGTCCATC	22	282		MNT-F2	GACTCAGCATTAAGGAGCCTG	21	MNT-R2	GTTGTGGACTTCTCTGGTTCC	21	296
chr6	NM_001498	GCLC	53362139	53409927	GCLC-F1	AAACCCAAACCATCCTACCC	20	GCLC-R1	TGCTTGTTTATTGCTTCATCTGG	23	294		GCLC-F2	GGGATTTGGAATGGGCAATTG	21	GCLC-R2	GCTGTCTATTGAGTCATATCGGG	23	280
chr13	NM_021033	RAP2A	98086474	98120252	RAP2A-F1	GGCTTCATCCTCGTCTACAG	20	RAP2A-R1	TGGGTCATCTTTGTCAGGC	19	297		RAP2A-F2	CGTAGGTCTATGTCGCGG	18	RAP2A-R2	GGCTGTAGACGAGGATGAAG	20	300
chr1	NM_145167	PIGM	159997461	160001783	PIGM-F1	GGGAAGGTTAGAAGTACGAAGG	22	PIGM-R1	TCAAGTTCAGGAGCCATTCG	20	107		PIGM-F2	GAATGCCTTGGAAAAGAGCTG	21	PIGM-R2	AATGTAACACAGTAGCAGAGGG	22	256
chr11	NM_033547	INTS4	77589765	77705717	INTS4-F1	ATTTCTCTGCCACCTATCTTCG	22	INTS4-R1	GTCAAGTCCTCGTGTAGTTCG	21	263		INTS4-F2	TCTCATCTTGTTCCTGCCTTG	21	INTS4-R2	ATTCCACAACTTTTCCTGCAAG	22	300
chr6	NM_018214	LRRC1	53659777	53788919	LRRC1-F1	CCCTGCTTACATTCCAGACAG	21	LRRC1-R1	ATGTGCTTTAACTCCCCTGG	20	286		LRRC1-F2	CTCCTGACCCTGCCTAAAAG	20	LRRC1-R2	ATAGCCACAGAGCCTTCAAC	20	262
chr1	NM_001441	FAAH	46859938	46879520	FAAH-F1	AGACCAAACAGAGCCTTGAG	20	FAAH-R1	AGTTCCCAGAGTTTTCCAGC	20	298		FAAH-F2	CTGAAGGGCTGTGTCTATGG	20	FAAH-R2	GGAGGGCATGGTATAGTTGTC	21	222
chr4	NM_001145855	SH3BP2	2813945	2842823	SH3BP2-F1	ATAGGGAAACTGAGGCTTTGG	21	SH3BP2-R1	GATCACGCCAATCCACTCTAG	21	284		SH3BP2-F2	AAGCCCAAGTTCCTGAAGATAG	21	SH3BP2-R2	ACCTTCTCATAGTCCTCGTCC	22	287
chr10	NM_152230	IPMK	59951277	60027694	IPMK-F1	GCTGACTGTTTTGATGGTGTTC	22	IPMK-R1	GGGTCACATCTTCCAGTTTTAGG	23	118		IPMK-F2	CAAGACAATGGGTGGAAAAGC	21	IPMK-R2	TGACTGCCCCTCTTCATTATG	21	285
chr10	NM_018464	CISD1	60028861	60049019	CISD1-F1	TCCAGAAAGACAACCCCAAG	20	CISD1-R1	CCACATTTAGAATCCAGCGAAG	22	290		CISD1-F2	GACTTCCAGTTCCAGCGTAC	20	CISD1-R2	TGAGCCCCATCACAGAATG	19	252
chr1	NM_006516	SLC2A1	43391045	43424847	SLC2A1-F1	TCATCGTGGCTGAACTCTTC	20	SLC2A1-R1	TGTCTTGTCACTTTGGCTGG	20	269		SLC2A1-F2	ATGATTGGCTCCTTCTCTGTG	21	SLC2A1-R2	GAACACCTGGGCGATGAG	18	294
chr2	NM_002823	PTMA	232573234	232578250	PTMA-F1	GCTGACAATGAGGTAGACGAAG	22	PTMA-R1	GGGAAGTGGAGGGTGAATAG	20	260		PTMA-F2	GTCCCTGAACTCTCGCTTTC	20	PTMA-R2	CTCTTCCTCACCATCACCTTC	21	281
chr20	NM_018683	RNF114	48552913	48570422	RNF114-F1	AGGAATGTCTGAAGCCGAAG	20	RNF114-R1	GGACAGTAAGGACAAGGAAAGG	22	280		RNF114-F2	GATCGAGAGCACAGAGACTTC	21	RNF114-R2	AGGCACATATCGGACAAACC	20	284
chrX	NM_139058	ARX	25021812	25034065	ARX-F1	GCAGAAAGGCACAAAGATCG	20	ARX-R1	CCCAGCAACCGCATTTTG	18	273		ARX-F2	GCAAGGAGGTGTGCTAAAGG	20	ARX-R2	GAGAGTGGATGTTGGAGTTGG	21	277
chr12	NM_001940	ATN1	7037479	7051484	ATN1-F1	TCTTCGTCACCAGCTCTTTG	20	ATN1-R1	GCTCCAAGGTCCAATGTAGG	20	283		ATN1-F2	TCTTCGTCACCAGCTCTTTG	20	ATN1-R2	TTGATCGCAGGTTCTACAGTG	21	248
chr13	NM_203487	PCDH9	66876965	67804468	PCDH9-F1	CAGGACGAATTCTATGACCAGG	22	PCDH9-R1	AGAGTGACCCAAAACCAAGC	20	150		PCDH9-F2	GCATGGCTTTCTATGTGTTGG	21	PCDH9-R2	TGAGCTATTGCGGAATCCAG	20	284
chrX	NM_004143	CITED1	71521487	71526837	CITED1-F12	GCCAATTTATCCAACTTCTGCC	22	CITED1-R12	GTTCCATTTGAGGCTACCCC	20	197		CITED1-F22	ATGAGGAAGTGCTGATGTCG	20	CITED1-R22	CCTCCATCTTTAGGGACACTTG	22	147
chr10	NM_147156	SGMS1	52065344	52383737	SGMS1-F1	AGCATGTACGATCCCTGAATG	21	SGMS1-R1	TTCCCAACCAGACACTTTCG	20	267		SGMS1-F2	AGCAAGCGTACCTGAGAATAC	21	SGMS1-R2	ACCAGCTTCTCCCATTGTTC	20	103
chr19	NM_001077500	KLK10	51515999	51523431	KLK10-F1	CTGAGCCCTAAAGAGTGTGAG	21	KLK10-R1	AGCAGGAGCATAACATCTGG	20	290		KLK10-F2	TTGTCCATCCCAAGTACCAC	20	KLK10-R2	CTCACACTCTTTAGGGCTCAG	21	260
chr3	NM_001145319	PLS1	142315228	142432505	PLS1-F1	ACTACCATCTGACCAATGCAG	21	PLS1-R1	GTCCATCTTCCCCACCTTTAG	21	120		PLS1-F2	GGGAAGGGATTACTGCTATTGG	22	PLS1-R2	GAAATAGTGAATGGCGTGAGC	21	283
chr5	NM_020796	SEMA6A	115779250	115910551	SEMA6A-F1	TGTTGCGTTCTCTACCTGTG	20	SEMA6A-R1	TCTGATGTGGTTGTGCTGG	19	270		SEMA6A-F2	CAGCCATTTATCACCCAACAG	21	SEMA6A-R2	TAACTTTCCCGAATCACTCCC	21	288
chr2	NM_001277140	ACTR3	114648174	114719129	ACTR3-F1	CAAGACAAGTAGGAGAACGGAC	21	ACTR3-R1	CTGGGCAGACATAACTATAGCG	20	246		ACTR3-F2	TGTTCCTCTTCATTCTGGGC	0	ACTR3-R2	GCCTGGTGACTATGAACTACG	22	127
chr3	NM_014926	SLITRK3	164904507	164914469	SLITRK3-F1	GATTTGCATTCAGGTTCCAGC	21	SLITRK3-R1	CACAGTAGCATGGATCAAAACAG	23	256		SLITRK3-F2	CCCAAATTAAAGGAACTGCACG	22	SLITRK3-R2	AAGTGTAAAGGGAGCAAGGG	20	299
chr14	NM_030631	SLC25A21	37147125	37641865	SLC25A21-F1	GGTCTTGTAGAAATTTGCCTGATG	24	SLC25A21-R1	GTTAGTCCAGATCCCAATCCAG	22	296		SLC25A21-F2	TCTCTGGATCAGTAGGCTGTG	21	SLC25A21-R2	GTTTGGATCGGTTGCACATC	20	233
chr9	NM_006200	PCSK5	78505559	78808661	PCSK5-F1	GCATCTACACCATCTCCATCAG	22	PCSK5-R1	CATTAGCGTTCAAATGTCCCG	21	297		PCSK5-F2	AGCCAATCCGTTTCTGACC	19	PCSK5-R2	ATTTGTCGGTCTGTGCTCTC	20	225
chr15	NM_004039	ANXA2	60639349	60690185	ANXA2-F1	TGGAAAGCATCAGGAAAGAGG	21	ANXA2-R1	GTAGTCGCCCTTAGTGTCTTG	21	260		ANXA2-F2	ATATTGCCTTCGCCTACCAG	20	ANXA2-R2	GTCCTTCTCCAGATCAGTCTTG	22	266
chr14	NM_173159	NPAS3	33408458	34273382	NPAS3-F1	ATGAGGGACTTTGCTAACCAG	21	NPAS3-R1	GGTAGATGGAGACTGTTTCGG	21	289		NPAS3-F2	TGACCCCTGTAGATATCGTAGG	21	NPAS3-R2	AGTTTTCTCCGGCAGATGG	22	299
chr12	NM_006313	USP15	62654120	62803501	USP15-F1	GTTTAGCTACGTCACCCCAAG	21	USP15-R1	GCACACTCAGGACAAACTAAAG	22	297		USP15-F2	TTGGTCAGCCCTTTCTTATGG	21	USP15-R2	CTGAGGGAAGTTCTTGATCCTG	22	255
chr7	NM_032639	PLEKHA8	30067976	30130359	PLEKHA8-F1	ACTAAGACTCTACTGTGACCTCC	23	PLEKHA8-R1	GCTCAACTCCATTTGCCTTTC	21	298		PLEKHA8-F2	ACACGCATGGACCTGATAATC	21	PLEKHA8-R2	AGTTCCCACATCAATTCCCTC	21	285
chr3	NM_002886	RAP2B	152880000	152888413	RAP2B-F1	CGTTCTCTGGGTTGCTCTC	19	RAP2B-R1	TCCTTGCGGTAAAAGTCTTCG	21	268		RAP2B-F2	AAACAAAGCCTCGGTAGACG	20	RAP2B-R2	AGTGGTCTCCAATCTCAAAGC	21	207
chr16	NM_015144	ZCCHC14	87439851	87525460	ZCCHC14-F1	TGCCACAAGATCACTCCAAG	20	ZCCHC14-R1	ATCAGACCACAAGACCTCAAAG	20	222		ZCCHC14-F2	TTGAGGTCTTGTGGTCTGATTC	22	ZCCHC14-R2	GGAGAGGAAGTGCTGAGAAAC	21	259
chr16	NR_110943	LOC101928737	87527792	87549236	LOC101928737-F1	TCACCCACAGAGAAACATGC	20	LOC101928737-R1	CCCACTCTTAAAACTCTCCCAG	22	189		LOC101928737-F2	TGAGGCCAAGAGTTTAAGACC	21	LOC101928737-R2	ATCAAGCAGAACTGGACCTG	20	111
chr3	NM_007159	SLMAP	57743173	57914894	SLMAP-F1	CAGTAAGGCAGAAAACCAAGC	21	SLMAP-R1	GTGTACGGACTCAAGGAACG	20	291		SLMAP-F2	AGGTAGCAGAGGGAAAACAAG	21	SLMAP-R2	TTGGTTAGATGCCCTTCGAC	20	265
chr4	NM_005841	SPRY1	124320644	124324915	SPRY1-F1	ATATGGTGATGGGATTGTCCG	21	SPRY1-R1	TTGTCTTGGTGCTGTCCG	18	294		SPRY1-F2	AGGGTGCAGATGTAAGAACTC	21	SPRY1-R2	TGTTGAAAGTGGGAGCCAG	19	298
chr5	NM_003664	AP3B1	77298149	77590579	AP3B1-F1	CTTGGCACCTTATCTCATACTCTC	24	AP3B1-R1	GTCCTCATTGCTGTCTCCTTC	21	291		AP3B1-F2	AGTGGAAAAGGACTAGCTGC	20	AP3B1-R2	TGGTACACAACTGGAAACTGG	21	268
chr2	NR_034059	PSMD1	231921577	232037540	PSMD1-F1	AATGGAAGTGGATGAGGCAG	20	PSMD1-R1	AGAGTGGTTTGAAAGGCTGG	20	161		PSMD1-F2	ACTGTTGGCACCCCTATTG	19	PSMD1-R2	ACTGGCTTCTGGTGTCTTTC	20	138
chr16	NM_024306	FA2H	74746855	74808729	FA2H-F1	GAGAAGTACGATGAGTGGGTTC	22	FA2H-R1	GAAGCGGTGGATGAGGTAC	19	294		FA2H-F2	GGTGGATTGGGACAAGGAC	19	FA2H-R2	AAATGACGTGAAGAGTCGGAC	21	259
chr17	NM_000691	ALDH3A1	19641297	19651746	ALDH3A1-F1	GTTCGACCATATCCTGTACACG	22	ALDH3A1-R1	ATTTCTTAGCATCTTCCCCGTAG	23	296		ALDH3A1-F2	GGAAGATGCTAAGAAATCCCGG	22	ALDH3A1-R2	TCGTTGCTGGAGAACATGTAG	21	294
chr4	NM_018717	MAML3	140637545	141075233	MAML3-F1	CAGCAATCACATCTACCCCG	20	MAML3-R1	TGTACATTCCTGGTTGGCTG	20	280		MAML3-F2	AACCCCTTGATGCCGTATATC	21	MAML3-R2	GAGACCATGCCACCTGAG	18	284
chr6	NM_003514	HIST1H2AM	27860476	27860963	HIST1H2AM-F1	GTGCTGGAGTACCTAACTGC	20	HIST1H2AM-R1	AGAGCCTTTTGTCTTGTAAGTTTAC	25	274		HIST1H2AM-F2	TCACTTTCTGACTTAGGCCAC	21	HIST1H2AM-R2	TACAGGAAATTGGAGCCCAG	20	118
chr9	NM_003028	SHB	37915894	38069210	SHB-F1	CAAGAGCAAAGCAGGAAAGG	20	SHB-R1	CAAGGCTGGTCGTACTCATC	20	252		SHB-F2	ATCAAAGTGGAGAGCGCC	18	SHB-R2	TCCTGCCTCTGAAATTCTGTC	21	299
chr5	NM_012446	SSBP2	80713178	81047072	SSBP2-F1	TCAGCCTTTTATGTCACCTCG	21	SSBP2-R1	TCTCATTGCACCTCCATAGTTC	22	223		SSBP2-F2	TTTTGGGATCTCTACTGTGCAG	22	SSBP2-R2	GAGTAATGGCTGACTTCCTGG	21	267
chr14	NM_015346	ZFYVE26	68213236	68283306	ZFYVE26-F1	GATCATGTGGAGGTCAAGGTAG	22	ZFYVE26-R1	GTGTAGAAAGTGGGAGGTCATC	22	295		ZFYVE26-F2	CTACCTCCAAGAAACATCCCG	21	ZFYVE26-R2	GCAGAACACGGAAAGCAATTC	21	284
chr14	NM_133510	RAD51B	68286495	68944810	RAD51B-F1	TTCTTATTGCCAAGTCCCCTC	21	RAD51B-R1	TTCATCTTCACCTTCCCTGC	20	289		RAD51B-F2	ACTCTGTTGCTTCTGTGGTC	20	RAD51B-R2	GGTATTTCCTAGTGCGGCTATC	22	269
chr4	NM_178835	ZNF827	146681887	146859607	ZNF827-F1	CAAATAGCCCCTCTTCATCCTC	22	ZNF827-R1	CACATCACACTCAAACATCCG	21	266		ZNF827-F2	AAACCCTCCAATTCAGCCTC	20	ZNF827-R2	TGGCGTGAGGAAGTAAAAGG	20	257
chr2	NM_006449	CDC42EP3	37869024	37899342	CDC42EP3-F1	CTTTTGGATGAGGTGCTGAATG	22	CDC42EP3-R1	TCCTGAAAATGGGCTCTGAC	20	278		CDC42EP3-F2	GTCTCGGAGCGGATAATGC	19	CDC42EP3-R2	TCAAGTGGCTTCAGAAGTGG	20	256
chr19	NM_001079817	INSR	7112265	7294011	INSR-F1	ACACAACCTCACCATCACTC	20	INSR-R1	AGAACAGCATGAACCCCAAG	20	272		INSR-F2	CCTGTGACGCATGAAATCTTTG	22	INSR-R2	CGTAGAAATAGGTGGGTTCCG	21	265
chr13	NM_001040153	SLAIN1	78273015	78338377	SLAIN1-F1	GCATTTCCCAGTGTCTATCCG	21	SLAIN1-R1	CTCCAATTTCCATCCCTCAGAG	22	300		SLAIN1-F2	AATCCCTGACTCCTTTGCAG	20	SLAIN1-R2	AAGTGTAACCTTGCTCCAGTC	21	108
chr9	NM_001190228	RNF224	140122017	140124090	RNF224-F1	GGCAAGACTAGAACCCCTG	19	RNF224-R1	CTGCGTATAGGATGCTACTGC	21	285		RNF224-F2	CATCAAGGTGAGGCTGAGAAG	21	RNF224-R2	GCCACAAAGCCTTGAAACTAG	21	151
chr9	NM_031297	RNF208	140114698	140115775	RNF208-F1	CACCCGAACATCCAGTCTG	19	RNF208-R1	CAATGATCTCTGTGTCTGAGGG	22	254		RNF208-F2	CAAGTTCATCTCCTGCCCC	19	RNF208-R2	CCCTGAAGAAGCAGCGAG	18	299
chr9	NM_199001	C9orf169	140119086	140120763	C9orf169-F1	AGACCGAGAGGACAGACTG	19	C9orf169-R1	GGATGAGGAACAGGTGGAAG	20	161		C9orf169-F2	CTGTGTCATCTCCTAGCCC	19	C9orf169-R2	TCACCCTGCTTTATTGCCTG	20	260
chr6	NR_046399	RNF8	37321747	37362514	RNF8-F1	AAATGGGAGTTGAGGCAGTAG	21	RNF8-R1	TGGAAATTGGATGAGGTGGG	20	300		RNF8-F2	GAGCAGGAACTTCAGGACTTAC	22	RNF8-R2	CCTTTTCTCCTTGGGCTATCTC	22	139
chr3	NM_001063	TF	133464976	133497850	TF-F1	TGGGACAATCTGAAAGGCAAG	21	TF-R1	CACATCTCCCTTCTCAACCAG	21	270		TF-F2	TGGTCACACGGAAAGATAAGG	21	TF-R2	GCCCTACCTCTGAGATTTTAAGG	23	298
chr3	NM_002292	LAMB2	49158546	49170599	LAMB2-F1	TCCTGTTACTGCAAACGTCTAG	22	LAMB2-R1	GTCCTCAGCCTCCCAAATTAG	21	252		LAMB2-F2	GCAGTCAGAGAATGGTATCCC	21	LAMB2-R2	CAGCACACGATAGATGACCTC	21	295
chr2	NM_017849	TMEM127	96915945	96931751	TMEM127-F1	GCCTTCGCCCATATCCTAAC	20	TMEM127-R1	GCTCGTTCTCTTCCATCTCTG	21	268		TMEM127-F2	CAGAGATGGAAGAGAACGAGC	21	TMEM127-R2	GAGCAGGGATACTTGGATGAC	21	254
chr17	NM_001098426	SMARCD2	61909440	61920351	SMARCD2-F1	CCTCTGACACAAAAGCGAAAG	21	SMARCD2-R1	TTGTCCAGCTCAATGACGAG	20	227		SMARCD2-F2	GACACTCCAGTTCTCTAGCATG	22	SMARCD2-R2	AAATTTCCAAACCTGCCAGATG	22	165
chr1	NM_001171811	GBA	155204238	155214653	GBA-F1	AAGTGAAGGGATTTGGAGGG	20	GBA-R1	GAGCTTGGTATCTTCCTCTGG	21	239		GBA-F2	TCGCTTTCCTCACTTTTCTCC	21	GBA-R2	CATCTATCCCAACCTGAATCCC	22	257
chr5	NM_005575	LNPEP	96271345	96365115	LNPEP-F1	ACCGAGCCAACCTTATCAAC	20	LNPEP-R1	GAAGCTCTCGCATAGATGGAG	21	279		LNPEP-F2	CAATGGAACTCAAAGCCTACC	21	LNPEP-R2	AATCCCATGCCAGTAAGTGTC	21	284
chr4	NM_203283	RBPJ	26321331	26436752	RBPJ-F1	ACAAGAGTCTCAACCGTGTG	20	RBPJ-R1	AGTCGATTAAACAGAGCCACC	21	297		RBPJ-F2	CCACTCCATGTCCAAAAGAAC	21	RBPJ-R2	CTACATCCCCAAACCACACTC	21	240
chr19	NM_000148	FUT1	49251267	49258647	FUT1-F1	ACTCTGGACATTGGCTAAGC	20	FUT1-R1	CTGTAGATATGGGCTGGGAAG	21	298		FUT1-F2	AGACCCTGTTCCACTCCG	18	FUT1-R2	GGCTACCTGGCTTCTGAG	18	293
chr22	NM_194326	RPS19BP1	39925097	39928860	RPS19BP1-F1	GTAGTGTGAGGCTCGTGG	18	RPS19BP1-R1	CTCGTCCTGGTCAGAAACTTC	21	284		RPS19BP1-F2	CAATTCAGGCCCAGAAACTG	20	RPS19BP1-R2	CTAGCTGCCGAAGTATTCCTG	21	290
chr20	NM_181659	NCOA3	46130600	46285621	NCOA3-F1	TCTATTCCCACATTGCCTCTTC	22	NCOA3-R1	ATGCTCTTTCGTCACTCTGG	20	289		NCOA3-F2	CCGCTTTTACTTCAGGCATTG	21	NCOA3-R2	TTGGGTCTCATTTGTCCAGG	20	222
chr1	NM_019073	SPATA6	48761043	48937880	SPATA6-F1	GTTCACCTTCAAACTGCGATG	21	SPATA6-R1	TGTTCTCAAAGATGGGTCGG	20	282		SPATA6-F2	TGACAGTGACCCCGAGTATAG	21	SPATA6-R2	TGTGAAGCAGAACTACAGGC	20	183
chr5	NM_006633	IQGAP2	75699079	76003957	IQGAP2-F1	CTTTGCCCCGAAAATGGTATC	21	IQGAP2-R1	CTCCATCGCTCTTAACCACTG	21	121		IQGAP2-F2	AGCATGTAATGTCCCTGAGC	20	IQGAP2-R2	TCCCCAAGAAAAGATTCCACG	21	225
chr2	NM_015189	EXOC6B	72406443	73053177	EXOC6B-F1	TGGATGTTGAAGACGAGGAAG	21	EXOC6B-R1	CTCTATTTACTAAGCCCTGGG	21	289		EXOC6B-F2	AAGATTGACCAGTTCCTACAGC	22	EXOC6B-R2	CTGTAATGCTCCCAAGGTGAG	21	243
chr8	NM_173519	CLVS1	62200524	62414204	CLVS1-F1	CTCCTTCACAGACATCCTTCG	21	CLVS1-R1	ATCCGTTTCCTGGTCTTGTC	20	285		CLVS1-F2	AAATACATTCCCAAAGCAAGGC	22	CLVS1-R2	CCAAATCTCCGTTCCAAGTG	20	251
chr2	NM_172070	UBR3	170684017	170940639	UBR3-F1	GAGAGGTCGATGTTAGAAGGC	21	UBR3-R1	AGCTTTGGGAGTATACATGCC	21	297		UBR3-F2	TCTGCACCAAGGTTCCTAAAG	21	UBR3-R2	CCATGAGCATCCAAATACACG	21	226
chr4	NM_152770	C4orf22	81256873	81884910	C4orf22-F1	GTCACTCAATTCAACGCCTATG	22	C4orf22-R1	GTTTTCCACTGCGATTGTCTTC	22	289		C4orf22-F2	CCAACTATCAAGTGATTGCCG	21	C4orf22-R2	TTTGCCTTCCAGCTACAGG	19	282
chr10	NM_002247	KCNMA1	78644634	79397577	KCNMA1-F1	CAGAACTGTACCTCACGCAG	20	KCNMA1-R1	ATCCCCTAAGTCCGCAAATG	20	275		KCNMA1-F2	CCTATAGTGCGGTTAGTGGAAG	22	KCNMA1-R2	ATGTGGATTGAGGACGGAAC	20	224
chr4	NM_001034845	GALNTL6	172734574	173961558	GALNTL6-F1	ACAAAAGAATCCCCATCCCTC	21	GALNTL6-R1	ATCATAGCCACCCAATTCCC	20	128		GALNTL6-F2	GTTGGTCTCTGGTCTCTGTAC	21	GALNTL6-R2	TTCCCATGTTCACCTTTCCC	20	194
chr2	NM_024753	TTC21B	166729871	166810348	TTC21B-F1	ACAAGCTCGGGTACTAAAACG	21	TTC21B-R1	CTTCGTTATCCTGGTCACTCTG	22	278		TTC21B-F2	TCTGAGCTTCTGTCCAATGC	20	TTC21B-R2	AGAGGGATTGTGTTCTAAGCAG	22	208
chr2	NM_024989	PGAP1	197697727	197791454	PGAP1-F1	TTAATCTCTGGAACCTGGCG	20	PGAP1-R1	AACTCATATGCGGGATAGCG	20	181		PGAP1-F2	AGAGCTTCTGAACTTTGGACAG	22	PGAP1-R2	CTTAACTGTCACCTCGTACCG	21	262
chr5	NM_006727	CDH10	24487208	24645085	CDH10-F1	GACATCGTGACTGAGAAGGAC	21	CDH10-R1	GGGCTGGAAATAGAATCTGGG	21	299		CDH10-F2	TCCTGGGTTATTTTGGCTGG	20	CDH10-R2	TGGAGAGCAGAAATGTGGC	19	244
chr8	NM_013962	NRG1	31497267	32600770	NRG1-F1	TGTGCGGAGAAGGAGAAAAC	20	NRG1-R1	AGGCAGAGGCAGTCAATATTAG	22	286		NRG1-F2	CGAACCGACAGCCAGAAG	18	NRG1-R2	GCACCTTTCCCTCGATCAC	19	299
chr8	NM_198123	CSMD3	113235158	114449242	CSMD3-F1	ACCATCCAGTTTGACACGG	19	CSMD3-R1	TTCTCTTCCATCCCCATTTCG	21	132		CSMD3-F2	AATGGGAAGAGAATCGGATCAG	22	CSMD3-R2	TTGCTGTCATACTGGAACGG	20	233
chr20	NM_182734	PLCB1	8112911	8865547	PLCB1-F1	AGGAATGAAAGGAACCAGCC	20	PLCB1-R1	CTTGGGTGTCAGGGTTGTAG	20	291		PLCB1-F2	CGTGAACTTTTGGATGTGGG	20	PLCB1-R2	TGGAGTGACTTGCAGCTTAAG	21	237
chr15	NM_006154	NEDD4	56119116	56285944	NEDD4-F1	GTGGACTGGGAGATGTTGATG	21	NEDD4-R1	TGGCAGCTTTTCAGGAGTAC	20	254		NEDD4-F2	GTGAGAGTGACGTTATATGACCC	23	NEDD4-R2	TCTGTCGGTAATGGATAAAGTGG	23	218
chr12	NM_198827	GPR133	131438451	131626008	GPR133-F1	AAAGAGGAAAAGGGAGTCACG	21	GPR133-R1	TGTTCTCCTTGTGTCTTCCAG	21	125		GPR133-F2	ACCAATCCCTTCTGCGTATG	20	GPR133-R2	TCACGAGACACTTTTCCACTC	21	243
chr7	NM_182931	KMT2E	104654636	104754532	KMT2E-F1	TGGGCTTGTATCTGGTTTCG	20	KMT2E-R1	GGTGTTGGTAAAGGTAGGCTAG	22	279		KMT2E-F2	AGGACTTTTGGGAATGAGGC	20	KMT2E-R2	CTGGGTTTTCTTTGAGGCATG	21	208
chr8	NM_004519	KCNQ3	133133104	133493004	KCNQ3-F1	CCGCCACCTTTTCCTTAATTG	21	KCNQ3-R1	TCCAAGAGACCCAGCTTTTG	20	286		KCNQ3-F2	GATGTGAAGGATGTGATTGAGC	22	KCNQ3-R2	TTTCTGATGTGGATGGTCTGG	21	214
chr8	NM_024759	NIPAL2	99204386	99306621	NIPAL2-F1	TTTCAGTAAAGGCCGTCTCAG	21	NIPAL2-R1	CAAGGAATGACAGAAAACACCC	22	294		NIPAL2-F2	ACTTCAAGAGTGTGCTGTGG	20	NIPAL2-R2	TGCCATCCGACAAGGTAATAC	21	292
chr20	NM_019593	GPCPD1	5525079	5591672	GPCPD1-F1	GGTATCTCCCACTGTACTCCA	21	GPCPD1-R1	CAGCACTCTTTCCACTCTCAG	21	290		GPCPD1-F2	AAGGGATGGAATGTGGGATG	20	GPCPD1-R2	TCCGAGATCTGAGGTCCATG	20	233
chrX	NM_198057	TSC22D3	106956451	107019017	TSC22D3-F1	ACAAGATCGAACAGGCCATG	20	TSC22D3-R1	ACTTACACCGCAGAACCAC	19	253		TSC22D3-F2	AGAACCTCAATACCGACAAGC	21	TSC22D3-R2	CCTCTCTCACAGCATACATCAG	22	240
chr4	NM_133477	SYNPO2	119809995	119982402	SYNPO2-F1	GCTCTGCATTACCCAGTCTTG	21	SYNPO2-R1	AAACCACTTCATCTCCCTCAC	21	284		SYNPO2-F2	TCGAAATCAGAGCAAAGCCTC	21	SYNPO2-R2	TGGTACTTTCCACATAACCCC	21	242
chr13	NM_015011	MYO16	109248499	109860355	MYO16-F1	TGAAGGATGGGAATGGGAATG	21	MYO16-R1	AGGATAGGCAGATACGAGGG	20	227		MYO16-F2	TGAAAACCTACGATGCCCTG	20	MYO16-R2	ATCCATGCTGAACACCGAG	19	275
chr4	NM_001891	CSN2	70820973	70826726	CSN2-F1	TGAGAAGGTTAAACATGAGGACC	23	CSN2-R1	AGTGAGTTTTGGGATTTGAGGG	22	295		CSN2-F2	TGTTCCTCAGCCCAAAGTC	19	CSN2-R2	GTGATACAAAGACGGAAAAGGC	22	255
chr1	NM_032785	AGBL4	48998526	50489626	AGBL4-F1	AATTCCCATGCCGAGACTG	19	AGBL4-R1	CCTTCCCTTTCACTAGCCTATG	22	296		AGBL4-F2	ATCTTTGAGGATGAGGAACGG	21	AGBL4-R2	TGTAGCAATAGGAAGTGTGGTC	22	172
chr8	NM_001115	ADCY8	131792546	132052835	ADCY8-F1	GAGACAGAGAACCAAAGACAGG	22	ADCY8-R1	CAGGATTTTAATACGAAGGCAGTG	24	294		ADCY8-F2	TCTGGGCCTGAGGAAATTAAC	21	ADCY8-R2	TGGAGAACTGGATGGTCATTG	21	256
chr12	NM_013320	HCFC2	104458235	104500304	HCFC2-F1	TTTGGAGTGGAAGAGATGGC	20	HCFC2-R1	AGGAGTTGGTAGTGGCTTTG	20	132		HCFC2-F2	AAAGTGAAACCCCATCCCC	19	HCFC2-R2	ACAACCCCTTTAGTCACTGG	20	224
chr3	NM_033403	DCLK3	36753912	36781352	DCLK3-F1	GAGAAAGGTTATGGACTGGAGG	22	DCLK3-R1	CGTTTCACTGTATTGGTCTTGC	22	293		DCLK3-F2	GTTGGTGTTTCATGGGCAG	19	DCLK3-R2	GTTTCTCCAGATTCCCTCGG	20	167
chr2	NM_138394	HNRNPLL	38790327	38830178	HNRNPLL-F1	GGGAAGACGAGATAGAGGAAAG	22	HNRNPLL-R1	AGCAGAACAGGTTGAAGACTC	21	281		HNRNPLL-F2	GAATATAATCCAGCCACCCTCC	22	HNRNPLL-R2	CACTCCCATTCTAATAGCCCAG	22	177
chr4	NM_033115	TBCK	106965473	107237423	TBCK-F1	CCTTACACTGCTATGCTCCAG	21	TBCK-R1	GAGAGTGGCGTGGATATGAAG	21	267		TBCK-F2	AAACCATCACCCATCCCAG	19	TBCK-R2	TTCCCTGTGCAATTACCTCAG	21	171
chr1	NM_004481	GALNT2	230202955	230417875	GALNT2-F1	CTTATGTTGGAGGGACGATGG	21	GALNT2-R1	TCATTGCTGTAGTCATCCACC	21	286		GALNT2-F2	CTCTGCTTCGCCTTCCTG	18	GALNT2-R2	CCATCGTCCCTCCAACATAAG	21	250
chr15	NM_014848	SV2B	91643538	91844539	SV2B-F1	GTGTTTGTCATCGTCTGTGC	20	SV2B-R1	GCTTGGGAGTTTTGATGTTGG	21	202		SV2B-F2	CCAACATCAAAACTCCCAAGC	21	SV2B-R2	ATAGCGGATCATATCAGGAAACC	23	239
chr7	NM_015689	DENND2A	140218219	140302342	DENND2A-F1	TGACACGCACTTTATCGGAG	20	DENND2A-R1	AGGGCTGATTTTGGAAGGG	19	284		DENND2A-F2	CTTCGTGGAGATTGTGGGAC	20	DENND2A-R2	AGGAACTTATTGACACCGCTG	21	270
chr2	NM_015701	ERLEC1	54014067	54045956	ERLEC1-F1	ACATCCCTTTCCGAGTCAAC	20	ERLEC1-R1	TTTCTCTTCATGGTACTGCCG	21	296		ERLEC1-F2	TGGTTCTTACTGCTTTCGTGG	21	ERLEC1-R2	TCACCTGTCTTGGTTTGTCAG	21	272
chr1	NM_021080	DAB1	57463578	58716211	DAB1-F1	ATTTGACCCCTGTGACTTCTAC	22	DAB1-R1	CTTGCTCTTCGCTTTTGCTG	20	165		DAB1-F2	CCCCTGATATAACCTCTCCCC	21	DAB1-R2	CCCATTGCAACGTAACCTG	19	148
chr4	NM_006726	LRBA	151185810	151936649	LRBA-F1	GTACAAGACCAGCCATACCAG	21	LRBA-R1	TTTATCCCAGAAGCCACAGAC	21	177		LRBA-F2	TTCTCGGACACTTTTGGGTAG	21	LRBA-R2	CTCAAATTCCGCATGTCTGTG	21	289
chr8	NM_178565	RSPO2	108911543	109095913	RSPO2-F1	TGTGGAAGGATGTGAAGTTGG	21	RSPO2-R1	GCTAGGAAGACGCTGTGTTG	20	288		RSPO2-F2	CCCTCCAGTTCCTAGACTTTG	21	RSPO2-R2	ACTTCTGTTGACATCGGCTAC	21	227
chr5	NM_006203	PDE4D	58264865	58882324	PDE4D-F1	CTAGAGACCCTACAGACCAGG	21	PDE4D-R1	TTCCAGACCGACTCATTTCAG	21	109		PDE4D-F2	AGATCGAGCACCTAGCAAAAG	21	PDE4D-R2	TTCCAGACCGACTCATTTCAG	21	239
chr11	NM_024514	CYP2R1	14899555	14913751	CYP2R1-F1	AAGTGTTCCATCCTGAGCG	19	CYP2R1-R1	TTCCCGAAAACATCCCAGG	19	278		CYP2R1-F2	TGCTGGAACTGAAACTACAACC	22	CYP2R1-R2	ACCACGTACAACTGCATCTTC	21	247
chr16	NM_002661	PLCG2	81812862	81996298	PLCG2-F1	ATTCGTCCGTGTTCATCCTG	20	PLCG2-R1	GCGTCATACTTCTCATCCCAG	21	253		PLCG2-F2	AGGAAGTATTTGGCGACCTG	20	PLCG2-R2	GTAGTGCCGAGTCCATTTCTG	21	221
chr6	NM_030948	PHACTR1	12717036	13288075	PHACTR1-F1	CGGAATGAACAAGAGGAACAGG	22	PHACTR1-R1	TGAAGCGGATGAGGATCTTTC	21	118		PHACTR1-F2	ACGACAGCTCATTATACACCAG	22	PHACTR1-R2	TCCTGTTCCTCTTGTTCATTCC	22	259
chr7	NM_021807	EXOC4	132937822	133750513	EXOC4-F1	CACATACCAGAGCATCACAGAG	22	EXOC4-R1	GCCCTCCAAAGACTCAACTG	20	277		EXOC4-F2	AGCAGTTGAGTCTTTGGAGG	20	EXOC4-R2	AAGCATCTTTCACGAGGGAG	20	200
chr8	NM_014729	TOX	59717976	60031767	TOX-F1	TCAATGTGGGACGGTTTAGG	20	TOX-R1	ATGGCAGTTAGGTGAGGATTC	21	275		TOX-F2	AGGAGTTGCTTGATGTGAGAG	21	TOX-R2	GGGAAGGAGGAGTAATTGGTG	21	257
chr8	NM_004770	KCNB2	73449625	73850584	KCNB2-F1	CTTTCCTCTGAGCCTTCCTAC	21	KCNB2-R1	AACTGAAGCAATATCCCTCTGG	22	298		KCNB2-F2	GAAGGGTGCAAGATGGAAAATC	22	KCNB2-R2	GTACTTAAGCTAAACTGTTCATGCC	25	259
chr6	NM_000947	PRIM2	57182414	57513376	PRIM2-F1	CTGATGCTCTGGATTTGTTTCG	22	PRIM2-R1	AAGGTGGGAAGGATTTGGTAG	21	294		PRIM2-F2	TTTCTACCAAATCCTTCCCACC	22	PRIM2-R2	GTGTATAGTCTGTCCTCTTGCC	22	255
chr19	NM_003180	SYT5	55684468	55691720	SYT5-F1	ACGCTGAACCCTCACTTTG	19	SYT5-R1	GAGAAGCAGATGTCCCCAAG	20	236		SYT5-F2	GGACATCTGCTTCTCCCTC	19	SYT5-R2	TCGTTCTTGCCCAGCTTG	18	291
chr1	NM_014644	PDE4DIP	144851423	144995033	PDE4DIP-F1	GAGGACATCTACAAGCGGAAC	21	PDE4DIP-R1	GTTACACTCCTTCTCTGCTTCC	22	288		PDE4DIP-F2	TCCATTAACCAGAACTTCCCAG	22	PDE4DIP-R2	CATCAGTAGCATCACCCTCTAG	22	244
chr13	NM_005708	GPC6	93879077	95060273	GPC6-F1	CACAGCAAAGCCAGATACTTG	21	GPC6-R1	GTGACAAACTCAAACTCCGTG	21	266		GPC6-F2	CTGGTCAGCATTACCCTACAC	21	GPC6-R2	ATCACACGGAGAGCCATAATC	21	216
chr15	NM_000236	LIPC	58724174	58861073	LIPC-F1	CAACCAAACTGAGACACCAATAC	23	LIPC-R1	CTCCTGCTTTGACTCTGATCG	21	293		LIPC-F2	TCCCCTGTGTTTCTCCATTC	20	LIPC-R2	TCCAGTTTTCTAGCACGCC	19	287
chr1	NM_018284	GBP3	89472359	89488549	GBP3-F1	AAGATGGAGAGGGAGAGGG	19	GBP3-R1	TGGGTTAGGATGACAGAAAAGC	22	225		GBP3-F2	TCTCACACCAAAGGAATCTGG	21	GBP3-R2	AGGAGTCATTCTGGTTGTCAC	21	124
chr14	NM_001198967	NFATC4	24836116	24848811	NFATC4-F1	TCTGTCTCACTGTCTTCCCTC	21	NFATC4-R1	CCTTCACTCCAGTCCATTCTG	21	146		NFATC4-F2	GGATTTAGAGACTGGAGACGC	21	NFATC4-R2	TGAGAGGGAGTTAGATGGGAG	21	149
chr1	NM_013358	PADI1	17531620	17572501	PADI1-F1	TTCTGACCTTTGTGCCTACC	20	PADI1-R1	AATGTCCACGATGTCACTCTC	21	278		PADI1-F2	TGACTTTGGATATGTTACCCGG	22	PADI1-R2	TTTTGGTCAGAGGTAGGCAC	20	291
chr15	NM_000499	CYP1A1	75011882	75017877	CYP1A1-F1	CAGGGTACAGAGAAAGATCCAAG	23	CYP1A1-R1	TCAGGTAGGAACTCAGATGGG	21	279		CYP1A1-F2	GAACCTTCCCTGATCCTTGTG	21	CYP1A1-R2	CTCATCCTTGACAGTGCCAG	20	296
chr17	NM_025248	SRCIN1	36686258	36762183	SRCIN1-F1	CCCCGACAAAAGCAAACATG	20	SRCIN1-R1	GGAGAAATGGCAGGAGTGAG	20	255		SRCIN1-F2	CTGGAGAAATCGGTGGAGAAG	21	SRCIN1-R2	ACACCCTCATCCACTTGC	18	293
chr9	NM_032552	DAB2IP	124329380	124547809	DAB2IP-F1	AGGGATAGGCTAAGGAGTAAGG	22	DAB2IP-R1	CATCTCTGCGTGGTCCTTC	19	285		DAB2IP-F2	CAACTCCTACTGTGTCTTCCC	21	DAB2IP-R2	ATGTATTCCTCCTTGCTGCC	20	273
chr5	NR_109951	OSMR-AS1	38693314	38845931	OSMR-AS1-F1	CAAGAACCAGAGGATGAGGATG	22	OSMR-AS1-R1	TGTTCTGCCCCTTTCTAGTTG	21	165		OSMR-AS1-F2	TGAGAAGAGGAAGTGGGAGAG	21	OSMR-AS1-R2	CAACATCACTGAAAACCTCTGG	22	150
chr11	NM_001111018	NAV2	19372270	20143147	NAV2-F1	CGACACCATAGACAACCTCAG	21	NAV2-R1	AGCCTCCGTCTGATTTCTTG	20	182		NAV2-F2	ACAGGAAGCAATACCGTCAG	20	NAV2-R2	TCGGCAGTAACATTCCCTTC	20	128
chr15	NM_001243137	PDE8A	85523743	85682376	PDE8A-F1	GCATCCCCAAATCCCAAATC	20	PDE8A-R1	ATTTCGTCCAGTCCTTTCCAG	21	139		PDE8A-F2	ACCCTTGGCAACACTAGAAG	20	PDE8A-R2	GGACACATCAGCACATTTAATCAG	24	127
chr12	NM_001286548	CAPS2	75670999	75784702	CAPS2-F1	TCTTTCTCGTGTGCTGGATG	20	CAPS2-R1	GTGGGCAAGAATTCTGGTTTG	21	276		CAPS2-F2	AAGCAGACCCACCTCAATG	19	CAPS2-R2	TCCAGCACACGAGAAAGATG	20	126
chr3	NM_018147	FAIM	138327918	138352213	FAIM-F1	CGCTATCAGTGGTTTTGCTTATG	23	FAIM-R1	TTCTTTCCGCTTCCCACTAC	20	280		FAIM-F2	AGCGGGTGAGTTTGTAGATG	20	FAIM-R2	GACCCTTGGAATGTTAGTTTCATG	24	297
chr17	NM_005993	TBCD	80709939	80901062	TBCD-F1	TGAAGTTGCCGATGTAGAGC	20	TBCD-R1	TCAGGACGTGTGATAAATCTGG	22	285		TBCD-F2	ATGGACAAATACCAGGAGCAG	21	TBCD-R2	CAGAGCAAAAGCATGTAGCG	20	278
chr22	NR_046851	ZNRF3-AS1	29420986	29427464	ZNRF3-AS1-F1	GGTGTGGAGAAGGGATATTGG	21	ZNRF3-AS1-R1	ACTCTGCCACTTTTCTCCTTC	21	281		ZNRF3-AS1-F2	TCCCTCACAATCAAAAGCCTC	21	ZNRF3-AS1-R2	CCATTGCTGTCTCCTACTCAAG	22	267
chr22	NM_032173	ZNRF3	29313376	29453476	ZNRF3-F1	TCATCCCCTGTACTCACCG	19	ZNRF3-R1	GTCCATGCTTGTCCTCGTAG	20	242		ZNRF3-F2	GATTACACCACCTACACCACC	21	ZNRF3-R2	CTGGGTTTTCAGACACATCAAAG	23	271
chr8	NM_031466	TRAPPC9	140742585	141468678	TRAPPC9-F1	GCTTCTGTCATCTATCACTATCCTG	25	TRAPPC9-R1	TTCCAACTCAATCACTCCCG	20	289		TRAPPC9-F2	TGACTTTCTGTGGCTTGGAG	20	TRAPPC9-R2	CTTGCTGTAATAGGAAATCGCC	22	258
chr3	NM_003500	ACOX2	58490862	58522929	ACOX2-F1	TGGCAGTAAGGCTCATAAAGG	21	ACOX2-R1	AAGGCGTCATGGAGAAAGTC	20	271		ACOX2-F2	AAATGCACCCCGACATAGAG	20	ACOX2-R2	AGCCTAATTCACGACCATCTTC	22	264
chr2	NM_014914	AGAP1	236402732	237040444	AGAP1-F1	ACCCAGGATGCCATAAGTTC	20	AGAP1-R1	CCCACCTCCATTACTTGTCTG	21	288		AGAP1-F2	CCCAACATCTACTCCATCTACG	22	AGAP1-R2	GATAGCTCTGTCCATCAACGAC	22	283
chr11	NM_024769	CLMP	122943032	123066007	CLMP-F1	GCCTTTGCTTCCAATTTCCTG	21	CLMP-R1	GTTCATCCTCTCCCTCTTTCTC	22	283		CLMP-F2	TGCTCACCGATAATGAAGGG	20	CLMP-R2	GGCTTGGATGGTCTCACTAAG	21	250
chr12	NM_001160045	GLI1	57853917	57866047	GLI1-F1	CGTGAGCCTGAATCTGTGTATG	22	GLI1-R1	ATGTACTGGGCTTTGAAGGG	20	182		GLI1-F2	ACTGTCCATCTCACCTCTGTC	21	GLI1-R2	TTGGTGATTCATCTGGGCTG	20	181
chr11	NR_024469	LOC100130987	67085309	67159158	LOC100130987-F1	ACAAATGCTCCTTCTCCTGG	20	LOC100130987-R1	GGAATAAGGGTAGATGCCGAAG	22	157		LOC100130987-F2	CTCGGCGTTCTGAGGAAAG	19	LOC100130987-R2	CTCCAGCATCCCATATCTGTC	21	152
chr17	NM_018488	TBX4	59533806	59561664	TBX4-F1	CCCCAAGACCAAGTATATCCTG	22	TBX4-R1	ATCAGCCTTAACGATGTGGAG	21	283		TBX4-F2	ACTCTATGCACAAGTACCAGC	21	TBX4-R2	GATGCTTTTGGAAATCACGGG	21	263
chr1	NM_012302	LPHN2	82266081	82458107	LPHN2-F1	GCCTACAGAGTGACCGAAATAC	22	LPHN2-R1	AGCTGAAACTCCAACCACTG	20	287		LPHN2-F2	GGGTGCTGATTTTATTGGTCG	21	LPHN2-R2	GCAAAATTGGTTAGGTGGCTG	21	276
chr3	NM_007283	MGLL	127407904	127541725	MGLL-F1	GTTTTCGTCAGGGATGTGTTG	21	MGLL-R1	CGACCTCTGTCTTATTCCGAG	21	292		MGLL-F2	CGATTTGCCTGGTTCTGATTC	21	MGLL-R2	ATGGGACACAAAGATGAGGG	20	239
chr15	NM_000875	IGF1R	99192760	99507759	IGF1R-F1	ATTCTCATGCCTTGGTCTCC	20	IGF1R-R1	TGTTCCTGGTGTTTATGTCCC	21	270		IGF1R-F2	TGCGTGAGAGGATTGAGTTTC	21	IGF1R-R2	TCTCTGTGGACGAACTTATTGG	22	283
chr4	NM_001042424	WHSC1	1873122	1983934	WHSC1-F1	CACCATACAAGCACATCAAGG	21	WHSC1-R1	CCCTTTCTGATGTCCCTCTTG	21	292		WHSC1-F2	CGAGTGTTCTGTGTTCCTCAG	21	WHSC1-R2	TTGTCGGCTGGAATAAAGGG	20	108
chr9	NM_021224	ZNF462	109625377	109773796	ZNF462-F1	GAAACCTTACAAATGCCAGCTC	22	ZNF462-R1	CCCGTCCACAAAATTCACATG	21	290		ZNF462-F2	GGAGAAAGAGAAAGAGGATAAGGAG	25	ZNF462-R2	TCTGATTACTGGCATTCACGG	21	270
chr4	NM_001122681	SH3BP2	2794749	2842823	SH3BP2-F1	TGTTCTAGTTTACGTGCCCAC	21	SH3BP2-R1	GCCATAACTATACACCCCACC	21	105		SH3BP2-F2	ATAGGGAAACTGAGGCTTTGG	21	SH3BP2-R2	GATCACGCCAATCCACTCTAG	21	284
chr4	NM_002913	RFC1	39289068	39368001	RFC1-F1	ATTCAATAGCACCCCTCTTCG	21	RFC1-R1	TCATGTTTGCCTGTAGACGAG	21	286		RFC1-F2	GGATTATCTGTCGCTTCTAAGGG	23	RFC1-R2	AGTGAGTATGGAGTAAGGTGGG	22	243
chr19	NM_000435	NOTCH3	15270443	15311792	NOTCH3-F1	ATGCCAACTGAAGAGGATGAG	21	NOTCH3-R1	AAGTCTGTAGAGCGGTTTCG	21	281		NOTCH3-F2	TCTGTGACATCCGAAGCTTG	20	NOTCH3-R2	AGTTATCACCATTGTAGCCAGG	22	261
chr9	NM_015061	KDM4C	6757640	7175648	KDM4C-F1	CTGAGGTTCTGTCCATTGAGG	21	KDM4C-R1	GCTTAGTCTTTCCCTCCGATG	21	258		KDM4C-F2	CATTCCAGCACCAATTCAGC	20	KDM4C-R2	TTCCATTCATCCACACCCTC	20	249
chr7	NM_031946	AGAP3	150783798	150841523	AGAP3-F1	TCAATGTGGAGCGTGTCTTC	20	AGAP3-R1	TTGGACTGCTTTCGGATGG	19	292		AGAP3-F2	CCCAATATCTACGCCATCTACG	22	AGAP3-R2	CCATCCACCACAATCTCCTTC	21	272
chr11	NR_104476	NUMA1	71713909	71791520	NUMA1-F1	TCCTCTTAGCCTCTGGATCTAG	22	NUMA1-R1	ACCTTCCCATCACTCCAAATC	21	267		NUMA1-F2	TCTCTACTTCACTCCCATCCC	21	NUMA1-R2	TGAGTTGCCATAATCGGGAG	20	289
chr12	NM_001007026	ATN1	7033625	7051484	ATN1-F1	TCTCAACACATCACCATCACC	21	ATN1-R1	GGAAGAGTTGGAAGAGGAAGAG	22	299		ATN1-F2	AGTGATGGCAAAGCTGAGAAG	21	ATN1-R2	TGTCCTGGTCGATATCCCTAG	21	256
chr7	NM_018224	COA1	43678845	43769140	COA1-F1	GGGAAAACTTCGTGGACATTG	21	COA1-R1	TGGTAGAGATGAGGGAAGGATG	22	264		COA1-F2	CAGGACAACTTGCCTTTGATG	21	COA1-R2	TTTCCCTGTCGATGAGCTTG	20	279
chrX	NM_198270	NHS	17393542	17754113	NHS-F1	CAAGGAAATGTGGATGAGGC	20	NHS-R1	TGGGTGAAGTGATGGAACTG	20	271		NHS-F2	ACACAATATCCCTTCCACACTG	#REF!	NHS-R2	TCCTCAATTTTCGTCTCCGC	22	215
chr1	NM_005819	STX6	180941849	180992257	STX6-F1	GGTGAAAGGAGAGGTACAGAAAG	23	STX6-R1	TGCCGAGTACTTGTAATGAAGG	22	264		STX6-F2	AGATAAATATGGGCGTCTGGAC	22	STX6-R2	GCCGATCACTGGTCATATGAG	21	287
chr10	NM_001126049	KLLN	89618917	89623194	KLLN-F1	CTTTTGGTTCTGTGCTTGAGG	21	KLLN-R1	TTTGTAGATCCTTGACGGGTG	21	300		KLLN-F2	CTCAGTGTAGAGGGAAATGCAG	22	KLLN-R2	TCTCTGCGAACGATTGTGATC	21	141
chr4	NM_173075	APBB2	40812043	41216635	APBB2-F1	TGTGTTGACTGTCGCTATGG	20	APBB2-R1	GTGTGCTGTTCTTGGTTTCTG	21	282		APBB2-F2	CTTTGAGTGCCACGTTTTCTG	21	APBB2-R2	CTTCAGGTAAATAGCCGAGTCC	22	277
chr9	NM_001185059	ZCCHC6	88902647	88969402	ZCCHC6-F1	AACCCAATCTACAGTCAACCC	21	ZCCHC6-R1	TCCTGCTTCCATTTCTGACG	20	273		ZCCHC6-F2	GGCAGTAAAATGGAAAAGGGC	21	ZCCHC6-R2	AGCGGGTTGACTGTAGATTG	20	135
chr22	NM_025045	BAIAP2L2	38480895	38506676	BAIAP2L2-F1	GCCCCACCTCACAGATTC	18	BAIAP2L2-R1	GTTCACACTCTCCTTCATCTCC	22	284		BAIAP2L2-F2	CGAGATGGACCAGTTTTACAGG	22	BAIAP2L2-R2	CTCCAGGTCAGAGTTCAAGTG	21	262
chr4	NM_024677	NSUN7	40751913	40812002	NSUN7-F1	AATCTCGAAGTCTTGCTGTCC	21	NSUN7-R1	CTTTCTGTAACCTGTGATCCTTTG	24	270		NSUN7-F2	TTCCCAAGTACCACAATACCAG	22	NSUN7-R2	GCCCTTAGTTCCTGTTTCCT	20	257
chr9	NM_001282922	RGS3	116343156	116360023	RGS3-F1-1	AAGGTCAAGTCACAGTCCAAG	21	RGS3-R1-1	GTAGAGGTCAGAACGGAGAAAG	22	225		RGS3-F2-1	CTTCACCATTACAGACTCCCC	21	RGS3-R2-1	CCTCCGTCTCAAACATCCAC	20	123
chr9	NM_134427	RGS3	116327233	116360023	RGS3-F1-2	CCAGGACCCTCTTCTTTGAG	20	RGS3-R1-2	TCTGGAGAGAGGCTGGATTT	20	110		RGS3-F2-2	AAGTCATTCAAGCCCACCTC	20	RGS3-R2-2	TCACAAGCCAACCAGAACTC	20	149
chrX	NM_005096	ZMYM3	70459473	70474499	ZMYM3-F1-1	ACAGTTCTCAGACCAAACCTG	21	ZMYM3-R1-1	CTCGCTTCTCTTCCGTTCAG	20	113		ZMYM3-F2-1	GGACTGTAAGAGCAAGTACCTG	22	ZMYM3-R2-1	AGAAATGACGGATCTGCCCACGC	23	249
chrX	NM_201599	ZMYM3	70459473	70474038	ZMYM3-F1-2	TCCTCTTTGATTGTGGCCTG	20	ZMYM3-R1-2	ATCCTCTTTGATACGCATGGG	21	269		ZMYM3-F2-2	CAAGGGACTGAAAACCAACTG	21	ZMYM3-R2-2	ACAGCACAGGGAACAGAAC	19	256
chr3	NM_001128615	ARHGEF3	56761445	57113336	ARHGEF3-F1	GCCTGCCATACTGAGTCTATG	21	ARHGEF3-R1	CTTTAGGAGAGGGAAACATGGG	22	130		ARHGEF3-F2	CGGTGAGTTTTCCAGCCT	18	ARHGEF3-R2	ATCTTCATCTTGGGTGCTCTG	21	236
chr10	NM_133337	MYOF	95066185	95242074	MYOF-F1	TGGTTGGAGAGTTTAAGGGC	20	MYOF-R1	TGAGAGTGTTGGGAATGTAGTG	22	249		MYOF-F2	TTGACTTGGTGATCGGCTATG	21	MYOF-R2	CGGCTGTTCTTTACTTTGGTG	21	214
chr11	NM_001085467	CTNND1	57529233	57586652	CTNND1-F1	TCATTCCTCATTCTGGTTGGG	21	CTNND1-R1	TCACATTCCCGAAGTTTCCG	20	151		CTNND1-F2	TGCATCGCTTTCATCCAGAG	20	CTNND1-R2	TGCTAAACTTCCTCGCTCATG	21	230
chr14	NM_182914	SYNE2	64319682	64693167	SYNE2-F1	TCTGAGCGGAAGTTGAACAG	20	SYNE2-R1	GTTTAGTGAGTCTGGTGTGAGG	22	267		SYNE2-F2	CCACCGTACTAAACCTTCACC	21	SYNE2-R2	CCTTCTCATCTCCATTATCGCTC	23	213
chr1	NM_206933	USH2A	215796235	216596738	USH2A-F1	CCTACATTTAACAGCCCTACCG	22	USH2A-R1	ACCCGTCACTGAAGATGTTG	20	295		USH2A-F2	CAAGCAGTGGTCAACATCAG	20	USH2A-R2	CAGGATGGGTTCTCAGTTCAG	21	232
chr2	NR_024191	ATL2	38522028	38604432	ATL2-F1	TGCTTGCCCCTGAAAATTTG	20	ATL2-R1	TTATCGCCACTTCCTTGAGATC	22	288		ATL2-F2	GGTTTGGAAGGTGGAAAGC	19	ATL2-R2	CAGCAATGGAACCAGATTTCG	21	231
chr8	NM_145866	FZD3	28351721	28431785	FZD3-F1	CACTCTTGGTTGTAATTGGATGC	23	FZD3-R1	GTCGGCTCTCATTCACTATCTC	22	282		FZD3-F2	TTTGTTCTTGCTCCCCTCTG	20	FZD3-R2	GAATGCTGAAAACACCGATCC	21	160
chr16	NM_130844	WWOX	78133326	78134096	RBPJ-F2	GTGAGTTCCTGAGCGAGTG	19	WWOX-R1	GTTACTTTCACTTTGCACCGC	21	292		WWOX-F2	GGTTTACTACGCCAAGTAAGGG	22	WWOX-R2	CTGCATCCTGAACAGCAGAG	20	259
chrX	NR_001568	BCYRN1	70430034	70948962	BCYRN1-F1	CTGTAATCCCAGCTCTCAGG	20	BCYRN1-R1	TGCTTTGAGGGAAGTTACGC	20	159		BCYRN1-F2	CAGCTCTCAGGGAGGCTAAG	20	BCYRN1-R2	GCTTTGAGGGAAGTTACGCT	20	149
chr8	NM_001164383	STAU2	74332603	74659162	STAU2-F1	TCTGAGAGAGAAAGCGGACA	20	STAU2-R1	GAACACAGACACCCTCATGC	20	153		STAU2-F2	GCATGAGGGTGTCTGTGTTC	20	STAU2-R2	GGATCAGATTTCTGCTGCCT	20	202
chr17	NR_033876	LINC00511	70594179	70636611	LINC00511-F1	GACAGAACGTTTGGTGTTGG	20	LINC00511-R1	TCGGTCATTTCTTCCTTTCC	20	218		LINC00511-F2	GGCTGACCCTGAACTTGAAT	20	LINC00511-R2	GATGCTGAACAGGCTTTGAA	20	150
chr2	NR_110174	LOC101060091	114588759	114648569	LOC101060091-F1	GCAACTTCGTGTCTCTCCAA	20	LOC101060091-R1	GACATCGCCAGAAACAAAGA	20	104		LOC101060091-F2	CCAGGAGTCGAAAGGAGAAG	20	LOC101060091-R2	CTGCAGGAGAGCACAACTCT	20	136
chr10	NR_108035	LINC00866	99588234	99609555	LINC00866-F1	AGCCTATTCCAAAATCCCACC	21	LINC00866-R1	TCTCCATTTATTGTGTCCCTCTG	23	109		LINC00866-F2	GAGTTGGGAGGAGAGCAGTC	20	LINC00866-R2	CCAGTCTCTGGATTCCCACT	20	167
chr7	NR_046479	FKBP14	30050198	30066417	FKBP14-F1	GAGGCTTTTCTTGTGGAACG	20	FKBP14-R1	ACCAACATCAAATCCCCTCC	20	147		FKBP14-F2	GCGTTATAAGAGCCAGTCAGG	21	FKBP14-R2	TTCAAGGCTTACGGACAAGG	20	152
chr6	NM_003535	HIST1H3J	27858092	27858570	HIST1H3J-F1	TTGAAGACACCAACCTCTGTG	21	HIST1H3J-R1	AAGAAACCCAAGATAGAGCAGG	22	123		HIST1H3J-F2	GCAGACAGCTCGCAAGTCTA	20	HIST1H3J-R2	GAGCTCTGGAAACGAAGGTC	20	249
chr5	NR_105014	LOC728769	77654587	77656365	LOC728769-F1	TCGCTTTCCTCACTTTTCTCC	21	LOC728769-R1	CATCTATCCCAACCTGAATCCC	22	257		LOC728769-F2	CTTTAGCTGCGACCGAGTAG	20	LOC728769-R2	AGGGTTCCATACTCTCCGAG	20	111
chr12	NM_181352	ATF7IP	14537997	14655869	ATF7IP-F1	ACCCAGAGCAGTTAAACCTTG	21	ATF7IP-R1	TCCCCAGCCTCAAAACTAAAG	21	268		ATF7IP-F2	TTTCTGTGTCCTGTGTAGCTG	21	ATF7IP-R2	CCATTCTGAATCTCTGGTCCTG	22	263
chr1	NR_033967	SLC2A1-AS1	43424719	43449029	SLC2A1-AS1-F1	GCCTTCCTCTACTTCTCACAG	21	SLC2A1-AS1-R1	TTACTTGCTGGGTGATCTTGG	21	271		SLC2A1-AS1-F2	GGACCATTTCAACAACCCTT	20	SLC2A1-AS1-R2	TGGGCAAGTAATTTCCCTTC	20	170
chr8	NM_174911	FAM84B	127564682	127570711	FAM84B-F1	TTCAAACTCGCCCTAGAAGTC	21	FAM84B-R1	GGAGAAAATGTAGGAGACCCC	21	289		FAM84B-F2	CAGTCTCCTTGTTGCTTGGA	20	FAM84B-R2	GCCGCTAACAGATCTCACAA	20	152
chr19	NM_001267560	TJP3	3708334	3750811	TJP3-F1	AGAGACAGCGAAGAGTTTGG	20	TJP3-R1	CCCCGTTGATCTGTAGAATGAG	22	127		TJP3-F2	CTGTTGCCACCACAAGAGAG	20	TJP3-R2	TGTCAGCCACCTGTCTAGGA	20	161
chr3	NM_001131010	SATB1	18389132	18480265	SATB1-F1	GAACCTCTCCATGATCCGAAG	21	SATB1-R1	TCTGTCGGTTTTCCTCATCTG	21	290		SATB1-F2	AGGCAACTGGTAACCACCTC	20	SATB1-R2	AGCCCTACAGGAGATGTCTGA	21	116
chr1	NM_001146068	CAPN2	223889294	223963720	CAPN2-F1	TGCTGAGTGGTATGAGTTGAAG	22	CAPN2-R1	GGGTCTATAGTGTTCCAGCTTG	22	294		CAPN2-F2	GGCCCATCCTCAGAGACTAA	20	CAPN2-R2	CACCTGGCCTTCTTTCTTTC	20	117
chr12	NR_045962	KRT8	53290970	53343650	KRT8-F1	CGACGAGATCAACTTCCTCA	20	KRT8-R1	GGTACATGCTCTCAGCCTCA	20	194		KRT8-F2	ATCAGCTCCTCGAGCTTCTC	20	KRT8-R2	GGGTCTTGATCTGCTCCTTC	20	196
chr11	NR_037646	TMX2-CTNND1	57479994	57586652	TMX2-CTNND1-F1	AGCTTCGAGAGACACAGGGT	20	TMX2-CTNND1-R1	TCCGCAGTTCCTTATATCCC	20	126		TMX2-CTNND1-F2	CAGTGTCCTTTCCAGAGCAA	20	TMX2-CTNND1-R2	CAGTGGGCCTTATTCAAGGT	20	273
chr4	NR_037863	LOC285484	6202459	6235663	LOC285484-F1	AGAGAAGGCCCTCAAGTTCA	20	LOC285484-R1	TTAACGCCAGGATGTTCGTA	20	273		LOC285484-F2	CACTCCCAGTAGGTGCTCAA	20	LOC285484-R2	CAGTACCTCGCTCTGTCCCT	20	109
chr4	NR_048571	GPM6A	176554087	176923842	GPM6A-F1	GCAGCAGTCATTGCTATGGT	20	GPM6A-R1	TGGAGCGAGTAGAGTGGATG	20	145		GPM6A-F2	TGGAAGAGGGACAGACACAA	20	GPM6A-R2	GCTCCCTCCACTAATGTGGT	20	149
chr14	NR_029385	OTX2-AS1	57279900	57397550	OTX2-AS1-F1	TCGGCATGTATTCTTTGAGG	20	OTX2-AS1-R1	GGAGATTCAGCAATGAGCAA	20	216		OTX2-AS1-F2	AGAGAGGCAGACAAGGAAGG	20	OTX2-AS1-R2	TGAGAATCGCTTGAATCTGG	20	279
chr1	NM_001277444	NBPF9	144614958	145370304	NBPF9-F1	ATTCCTCCTGAAATGTTGGC	20	NBPF9-R1	AGACTTCAGGCCCTTTCTCA	20	187		NBPF9-F2	GAGGAATGTGCCATCACTTG	20	NBPF9-R2	CAGGGACTGGGAGAATGTTT	20	172
chr1	NM_001278267	NBPF20	144146810	146467744	NBPF20-F1	GGAAGTGGAAGAGCCTGAAG	20	NBPF20-R1	TCGGCTTAGTAAGGGCTGTT	20	245		NBPF20-F2	ATTCCTCCTGAAATGTTGGC	20	NBPF20-R2	AGACTTCAGGCCCTTTCTCA	20	223
chr1	NR_110793	GS1-204I12.1	185527511	185597620	GS1-204I12.1-F1	ATTTACCAGCCTTCCTGTGG	20	GS1-204I12.1-R1	CCAGTTGTTGAGGAAAGGGT	20	135		GS1-204I12.1-F2	GTAGAACGGACATGCACCAC	20	GS1-204I12.1-R2	TTACAGCCCTGTCCTCCTCT	20	128
chr5	NM_001177693	ARHGEF28	72921982	73237818	ARHGEF28-F1	TATTCAACTGGGCACGTGTT	20	ARHGEF28-R1	AAGGGTTCTTTCCAGGGAGT	20	264		ARHGEF28-F2	ATAGGCAGAGGAGGATGTGG	20	ARHGEF28-R2	AACACGTGCCCAGTTGAATA	20	117
chr2	NM_001164165	GPR75-ASB3	53897449	54087170	GPR75-ASB3-F1	CGGACACGTGCTCTACAGTT	20	GPR75-ASB3-R1	GCAAAGCACAGAAACCTTCA	20	228		GPR75-ASB3-F2	CACGGAGCAAATGTTAATGG	20	GPR75-ASB3-R2	TCAAGCTTTCTAGCTTGCCA	20	187
chr2	NR_103740	ABCA12	215796265	216003151	ABCA12-F1	TTCAGCACCAAAGTCTCAGG	20	ABCA12-R1	CACGGTGGTATCTGAAATGC	20	105		ABCA12-F2	CAGGAGTGCAAGACCAAGAA	20	ABCA12-R2	GCTTTGGTTTGATGTTCCCT	20	136
chr3	NM_001278659	SLC2A2	170714136	170744768	SLC2A2-F1	TCAGCTCTTCACCAATTCCAG	21	SLC2A2-R1	TCGCCCTGCCTTCTCCACAA	20	258		SLC2A2-F2	GATCAATGCACCTCAACAGG	20	SLC2A2-R2	ATGAGATTGTGGGCAGTTCA	20	125
chr1	NR_110787	LOC101929224	200638634	200663378	LOC101929224-F1	TCCCAGGTACAAGCAATTCTC	21	LOC101929224-R1	CAAGAGGCAGAGGTTGTAGTG	21	155		LOC101929224-F2	TGGGATTACAGATGGAGTTTTG	22	LOC101929224-R2	TGAAACCCCATCTCTACTAAAAAT	24	216
chr5	NR_049801	MIR548AO	92922830	92957593	MIR548AO-F1	CACTTGAGAATTTTGCAGAGGG	22	MIR548AO-R1	CTGTGTCAGAGGATTGAGTGG	21	170		MIR548AO-F2	AGACATGACGTTGGAAGCTCT	21	MIR548AO-R2	AGGGTTACATGAAAGTCTGCAA	22	272
chr1	NR_002753	RNU5F-1	220046618	220292777	RNU5F-1-F1	CAGTCAATAGCTGGGAAGCC	20	RNU5F-1-R1	AACCTCCCAAAGCATGAAAC	20	215		RNU5F-1-F2	CAGGCAGATCTCTGGTTTCTC	21	RNU5F-1-R2	AACCTCCCAAAGCATGAAAC	20	181
chr4	NR_106996	MIR1273H	39105519	39584819	MIR1273H-F1	GCTTAAGCAATCCTCCTGCT	20	MIR1273H-R1	TACTTCCCACCCTCCAGAAC	20	118		MIR1273H-F2	GCAGGATTGCTTGAGCCT	18	MIR1273H-R2	ACTCTGTCACTCGAGCAGGA	20	107
chr14	NR_106755	MIR548AZ	64419067	64927439	MIR548AZ-F1	TTGCTGCACAGAGATCAAGTC	21	MIR548AZ-R1	TTGATAGACCAGTCCCATGC	20	101		MIR548AZ-F2	TGCACCAACCTAATAAATTTGC	22	MIR548AZ-R2	TTTGATAGACCAGTCCCATGC	21	120
chr12	NR_106740	MIR6125	62654139	62654235	MIR6125-F1	TGGAAGAAGATGGCGGAAG	19	MIR6125-R1	CTCAACCCCTTTCTCTTACCAG	22	117		MIR6125-F2	CGGTGTCTTTTGGTTTCGAC	20	MIR6125-R2	CTCAACCCCTTTCTCTTACCAG	22	224
