# Supplementary material for: FXR1 regulates transcription and is required for growth of human cancer cells with TP53/FXR2 homozygous deletion
Source: eLife journal article supplement (doi:10.7554/elife.26129), 2017-08-02
Supplement: supp [file elife-26129-supp-v2.zip › elife_poa_e26129_Supplementary_File_6.xlsx]

## Sheet: DGE log2FC0.6 pAdj0.01
Table S6:FXR1 target gene analysis using RNA-seq in H358 cells
Differential gene expression profile using log2 fold change>0.6 and p value <0.01 as cutoff.
H358_Ctrl_UP	H358_Ctrl_DN		H358_D3_UP	H358_D3_DN		H358_D5_UP	H358_D5_DN
ACAT2	ABAT		ABCA17P	ABCA12		AASDHPPT	A4GALT
ADH1C	ABCA3		ABCB9	ABCB10		ABCB9	AACSP1
ATP10A	ABCC3		ABTB1	ABCD3		ABCF2	AARS
ATP6V0D2	ABLIM3		ACOT4	ACACA		ABHD2	ABAT
AVEN	ABTB1		ACOX2	ADAM9		ACER2	ABCA12
B4GALNT3	ACKR3		ACP5	ADARB1		ACOT4	ABCA7
C9orf84	ACPP		ACPP	ADCY9		ACOX2	ABHD11-AS1
CAP2	ADAM8		ACY3	AFG3L2		ACSL5	ABHD14B
CDC25A	ADM		ADAMTS15	AHNAK2		ACTRT3	ABHD3
CFI	ADSSL1		ADORA1	AKAP6		ACY3	ACACA
CHAC2	AFAP1L1		ADPRM	ALDH1A3		ADAM22	ACBD4
CLU	AGO4		ADRB1	ALDH3A1		ADAMTS14	ACKR2
CTTNBP2	ALDH3A1		AFAP1L2	ALMS1		ADAMTS15	ACTA2
CYB561D2	ALS2CL		AGAP2	ALS2CL		ADAMTS3	ACTA2-AS1
DANCR	AMN		AGAP2-AS1	ANKH		ADAT1	ADAM20P1
DDAH1	AMT		AGMAT	ANKRD11		ADGRG2	ADAM32
DKK2	ANG		AMH	ANKRD18A		ADGRG6	ADAM9
DOK3	ANGPTL4		AMOTL2	ANKRD20A19P		ADORA1	ADAMTS13
ENTPD3	ANKRD22		ANXA3	ANKRD36C		AEN	ADAMTS2
F5	ANKRD37		APOC1	ANKRD42		AFAP1L1	ADAP1
FGFBP1	ANO1		ARHGAP30	ANLN		AFAP1L2	ADARB1
FKRP	ANPEP		ARHGAP45	ANO1		AFG3L1P	ADCY10P1
FOXC1	APIP		ARHGDIB	ANP32E		AGAP2	ADCY6
GPR137C	ARFIP2		ARID3B	APBB2		AGAP2-AS1	ADCY9
GTF3C6	ARNT2		ATP5G2	APOD		AGL	ADGRA2
ID4	ARRDC3		ATP6V0D2	APOLD1		AGMAT	ADH1C
IDI1	ARRDC4		AXL	ARFGEF2		AGO1	ADIRF
IDI2-AS1	ATG9A		BARX2	ARFGEF3		AGPS	ADM
KRT4	ATP2B4		BDKRB2	ARHGAP5		AGT	ADM2
LHX4-AS1	ATP7B		BFSP1	ARID1A		AK1	ADORA2A
LINC01508	AVL9		BGLAP	ARNT2		AK4	ADORA2A-AS1
LIPG	AZGP1		BIK	ARSK		AKAP5	ADSSL1
LSS	B3GNT5		BIRC3	ASH1L		AKNAD1	AES
LUM	BACH1		BST1	ASPM		ALDH16A1	AGPAT1
LYPD5	BAIAP3		C14orf80	ASXL2		ALDH1B1	AGPAT4
MAP2	BCL2A1		C15orf48	ATG13		ALG10	AGR2
MAP2K6	BCORL1		C1QTNF6	ATP2B1		ALG13	AHSA2
METTL1	BEND3		C4orf19	ATXN1L		ALKBH8	AIP
METTL7A	BIK		C8orf58	AUH		ALMS1	AKAP8L
MTG1	BIRC3		C9orf40	AXIN2		ALPK3	AKR1A1
MVB12B	BMP3		C9orf84	B4GALT4		ALPP	AKR1C3
MVK	BNIP3L		CA5BP1	BAK1		AMDHD1	ALDH1A3
NAP1L3	BRIX1		CACNB1	BCL7A		AMER1	ALDH1L1
NDST3	BRSK1		CALM2	BCOR		AMH	ALDH2
NDUFV3	BRWD1		CAMKK1	BEND3P3		AMOTL2	ALDH3A2
NOL6	C10orf10		CAPN12	BICD1		ANK2	ALDH8A1
NRCAM	C10orf55		CASP1	BICDL1		ANKLE1	ALKBH7
ODC1	C15orf48		CASTOR1	BISPR		ANKRD26	ALS2CL
PCDH19	C15orf62		CCDC28B	BLVRB		ANKRD33B	ALX3
PCYT2	C1orf106		CCDC85B	BMS1P14		ANKRD36BP1	AMN
PDSS1	C22orf23		CCND3	C4orf32		ANKRD52	AMT
PFAS	C2orf72		CCR1	CACNA1D		ANOS1	AMY2B
PLEKHA7	C3		CCR10	CAMSAP1		AP4E1	AMZ2P1
PLEKHS1	C8orf4		CD38	CANX		APC	ANG
PRSS23	CACNB3		CDA	CASC10		ARHGAP31	ANKDD1B
PTPRZ1	CALB2		CDC42EP1	CASC4		ARHGEF37	ANKRD10
RAB15	CARD14		CDT1	CASK		ARL6	ANKRD20A19P
SCD	CCDC141		CELF6	CASKIN2		ARMCX4	ANKRD22
SCLY	CCDC146		CENPQ	CASP8AP2		ARNTL	ANKRD36C
SEC61A2	CCDC183		CFAP45	CASZ1		ARPIN	ANKRD65
SELPLG	CD177		CFLAR	CCDC113		ASB13	ANO1
SLC29A3	CD68		CFLAR-AS1	CCDC144NL-AS1		ASB9	ANO9
SLCO2A1	CD82		CHCHD10	CCDC169-SOHLH2		ASCC3	AOC2
SOCS2	CDK14		CHRNA1	CCDC81		ASF1B	AP1M2
SOX2	CDKN1A		CITED4	CCNB3		ASTE1	APBB2
SPAG1	CEACAM5		CKB	CCNJ		ASXL1	APOBEC3F
SPTB	CEACAM6		CLIC3	CD177		ATAD2	APOD
SYNM	CEBPB		CMTM3	CDC42BPA		ATAD3B	APTR
SYT10	CEBPB-AS1		CNTLN	CDC42SE2		ATAD5	AQP3
TBC1D30	CFAP45		CNTNAP1	CDH6		ATF7	ARF4-AS1
THBS1	CHST11		COL15A1	CDK19		ATP10A	ARFGAP3
VSTM2L	CLIC3		COL1A1	CDR2		ATP6V0D2	ARHGAP27P1
XK	COX6B2		CPA4	CDR2L		ATR	ARHGEF19
	CP		CSF1	CELSR1		AUNIP	ARHGEF4
	CPT1A		CSF2	CELSR2		AVEN	ARMCX3
	CRAT		CST7	CEP170		AXIN2	ARNT2
	CREB3L1		CTGF	CEP350		AXL	ARPC1B
	CSF2		CTRL	CHML		B3GALT5	ARRDC1
	CSPG4		CTU1	CHST11		B3GNT6	ARRDC4
	CSTB		CXCR6	CIRBP		BACE1	ARSA
	CTDSP2		CYR61	CLEC16A		BAG2	ARSK
	CUL4B		CYTOR	CLGN		BARX2	ARVCF
	CUX1		DAPK2	CLIP1		BCL2L11	ASNS
	CWC27		DBP	CMPK2		BDNF	ASPHD1
	CYP24A1		DDAH1	CNN2		BEND3	ASS1
	DBNDD1		DLK2	CNOT2		BEND6	ATF3
	DDX60		DMKN	CNOT6		BHLHB9	ATG13
	DENND2A		DOC2A	CNTNAP3		BIRC3	ATP2A3
	DENND3		DPM2	COBLL1		BLM	ATP2B1
	DHRS9		DTNBP1	COL8A1		BLZF1	ATP2C2
	DMD		DTYMK	COLQ		BMP2K	ATP6V0A1
	DNAH11		DUSP14	CPT1A		BMS1P22	AUH
	DNAH2		DUSP2	CREB3L2		BNIP3	AURKC
	DUSP4		E2F5	CSK		BOLA3-AS1	AZIN2
	DUSP5P1		EBPL	CTSE		BRCA1	B3GAT2
	EFNA3		ECE2	CTTNBP2NL		BRCA2	B3GAT3
	EGLN3		EDN2	CUX1		BRCC3	B3GNT7
	EHHADH		ELMOD1	CWC27		BRI3BP	B4GALT4
	ELL		EMP3	CYB5RL		BRINP2	B4GALT4-AS1
	ELL3		EN2	DCBLD2		BRIP1	B4GALT5
	ENO2		EPB41L4A-AS1	DDHD2		BRMS1L	B9D1
	ENTPD2		EPDR1	DDX11-AS1		BTBD3	BAIAP3
	EPOR		ETV7	DERL1		C11orf44	BAK1
	ERO1A		EVA1A	DIP2A		C12orf4	BBC3
	ERVH48-1		EXOSC5	DIP2C		C14orf105	BCAS4
	FAM102B		F2RL3	DNAJC6		C15orf41	BCAT2
	FAM13A		FAAP20	DNAJC7		C15orf48	BDH2
	FAM167A		FABP5	DNER		C17orf53	BET1
	FAM20C		FABP6	DOCK1		C17orf80	BICDL1
	FAM234B		FAM189B	DPH3P1		C19orf47	BICDL2
	FAM57A		FAM46B	DPYSL3		C19orf48	BISPR
	FAXDC2		FAM86FP	DRP2		C19orf57	BLVRB
	FBXO32		FAXDC2	DUSP5P1		C1orf112	BMP6
	FBXO6		FBXO32	DUSP8		C1orf220	BMS1P14
	FCGRT		FGD2	DVL3		C1orf226	BNIPL
	FCRLB		FGF1	EGLN1		C22orf46	BOD1
	FES		FHL1	EHHADH		C2CD3	BRK1
	FGF11		FIG4	EHMT1		C2CD4D	BRSK1
	FGF9		FLT3LG	EIF4G3		C2orf16	BST2
	FGFR3		FMR1NB	ENTPD3		C3orf58	C10orf10
	FLJ23867		FPR1	ENTPD4		C4orf19	C11orf49
	FLJ31356		FSD1	EPPK1		C4orf26	C11orf54
	FMNL1		GAGE1	ERV3-1		C5orf34	C11orf80
	FNDC11		GALNT9	ERV3-1-ZNF117		C7orf49	C17orf49
	FOSL1		GAS5	EYA3		C9orf3	C19orf18
	FOSL2		GAS5-AS1	F2R		C9orf41-AS1	C19orf38
	FOXO4		GBP1	FAHD2B		C9orf84	C1orf210
	G0S2		GCHFR	FAM120C		CA13	C1orf228
	GABARAPL1		GDPD5	FAM81A		CACNB4	C1orf61
	GGT5		GEMIN7	FAM83B		CAMK4	C1QTNF12
	GIPR		GPR176	FAR1		CAPN9	C1QTNF3
	GJB2		GPR183	FARP1		CASC2	C1QTNF9
	GJB3		GPRC5C	FARP2		CASP8	C1QTNF9B
	GNG12		GSTM4	FBN1		CASP8AP2	C1S
	GNG4		HAPLN3	FBXL19-AS1		CBFB	C21orf2
	GOLGA2P5		HAUS8	FBXL2		CBX5	C21orf58
	GPR132		HBA2	FBXO5		CCDC138	C22orf23
	GPR153		HBB	FGFR3		CCDC15	C2orf82
	GPR35		HEG1	FILIP1L		CCDC150	C4orf32
	GRHL1		HIST1H1C	FLRT2		CCDC171	C6orf226
	GSEC		HIST1H2BK	FOXA1		CCL28	C8orf44
	HAGLR		HIVEP3	FRYL		CCND1	C9orf16
	HBP1		HLA-B	FSIP2		CCND3	CA5B
	HCG11		HMGN2P46	FUBP3		CCNE1	CAB39L
	HES2		HN1	FXR1		CCNE2	CACNA1H
	HILPDA		HOPX	FZD3		CCR1	CACNA1I
	HINT3		HRCT1	GAB2		CCRL2	CACNA2D2
	HLA-F-AS1		HSD17B10	GAS6-AS1		CCSAP	CACNB3
	HMGN2P46		HSPB1	GFPT1		CCSER1	CALB2
	HPCAL1		ICAM1	GJB2		CD83	CAMSAP3
	ICAM1		ICAM2	GNAO1		CDC14A	CAMTA2
	IFNGR2		IFI6	GNAQ		CDC25A	CANX
	IGF2		IFT27	GOLGA4		CDC42EP3	CAPN1
	IGFBP3		IGF1	GPAM		CDC45	CAPN14
	IL17RD		IGFBP1	GPC4		CDC6	CAPS
	IL17RE		IGFBP4	GPR89B		CDC7	CARD11
	IL1A		IKBIP	GRK6		CDCA5	CARS
	IL1B		IL18	GSDMC		CDCA7	CASC4
	IL4R		IL20RA	GSEC		CDH11	CASZ1
	INS-IGF2		IL22RA1	GUCY1A2		CDH2	CAT
	INSR		INO80C	GULP1		CDT1	CATSPERB
	IRF6		IQCD	HAS3		CECR7	CATSPERG
	ITGA5		ISG20	HDAC4		CELF2	CBARP
	ITGB2		ITGB2	HDAC9		CENPF	CBFA2T2
	ITGB4		ITGB7	HECTD1		CENPI	CBFA2T3
	ITGB5		JAZF1	HECTD4		CENPJ	CBLB
	ITGB6		KCNF1	HERC2P3		CENPK	CCDC113
	ITPRIP		KHDC1	HOMER1		CENPL	CCDC146
	KANK3		KIF25	HPGD		CENPQ	CCDC169-SOHLH2
	KATNAL1		KLF2	HR		CENPS	CCDC175
	KAZN		KLHDC3	HS2ST1		CEP128	CCDC183
	KDM3A		KLHL35	HS3ST1		CEP135	CCDC78
	KDM7A		KLK10	HS6ST1		CEP162	CCDC88B
	KLF4		KPNA7	HSF2		CEP192	CCDC9
	KLF7		LAMA2	HSPA2		CEP78	CCNB3
	KRT13		LAMC3	ICE2		CERKL	CCT6P3
	KRT17		LAMP3	IDE		CFLAR-AS1	CD164L2
	KRT6A		LAPTM5	IFNE		CHAF1A	CD177
	KRT6B		LDLRAD2	IGSF1		CHAF1B	CD200
	L1CAM		LGALS2	IL7R		CHAMP1	CD24
	LAMA3		LGI4	ILF3		CHD1L	CD72
	LAMB3		LINC00116	INHBB		CHDH	CDC42SE2
	LAMC2		LINC00265	IPMK		CHEK1	CDH6
	LCN2		LINC00460	IPO9		CHI3L1	CDK2AP2
	LCNL1		LINC00880	IPO9-AS1		CHM	CDKN1A
	LDLRAD1		LINC00922	IREB2		CHRNA1	CDKN1C
	LEMD1		LINC01234	IRS1		CHST15	CDKN2A
	LETM2		LINC02029	ITGA6		CIDECP	CDKN2B
	LINC00294		LMBR1L	ITGAV		CLDN10-AS1	CDR2
	LINC00319		LMCD1	ITSN1		CLIC5	CDR2L
	LINC00482		LOC100130111	KANK2		CLN6	CEACAM22P
	LINC00922		LOC100506603	KATNAL1		CLSPN	CEACAM5
	LINC01588		LOC100506688	KIAA0232		CNTF	CEBPG
	LINC01979		LOC100652768	KIAA0319		CNTLN	CEL
	LINC02035		LOC100996447	KIAA1024		CNTNAP1	CERS4
	LINC02210		LOC101928336	KIAA1549		COA7	CFAP74
	LIPH		LOC102724428	KIAA1958		COBL	CFDP1
	LMNTD2		LOC102724927	KIF1B		COL12A1	CFHR1
	LOC100506548		LOC105376554	KIF5B		COL15A1	CGB7
	LOC102723566		LOC441455	KITLG		COL5A2	CHAC1
	LOC102724428		LOC654342	KLF12		COMMD9	CHKA
	LOC284454		LOXL4	KLF5		COX10-AS1	CHPF
	LOC729737		LRRC75A-AS1	KLHL2		CPA4	CHST11
	LOX		LURAP1L	KMT2A		CPEB4	CIB1
	LOXL2		LXN	KMT2C		CPNE5	CIRBP
	LRP1		LYPD5	L1CAM		CRISPLD2	CLDN1
	LRP4		LYPLA2	LFNG		CSF1	CLDN2
	LRRC23		LYSMD2	LHX1		CST7	CLDN7
	LRRC3		MARCH9	LINC00342		CTGF	CLEC11A
	LTBP2		MCRIP1	LINC00641		CTPS1	CLIC3
	LUCAT1		MEIOB	LINC01468		CXCR3	CLK1
	LY6D		MFSD11	LIPA		CXCR6	CLMN
	LYPD3		MGLL	LMLN		CXorf57	CLN8
	LYPD6B		MIR147B	LNPK		CYB5RL	CNFN
	MAFF		MIR3198-2	LOC100128770		CYP2U1	CNN2
	MAP3K8		MIR4435-2HG	LOC100129917		CYP4V2	CNOT6
	MAPK3		MIR6797	LOC100130744		CYP7B1	COA5
	MBNL1		MIR6805	LOC100287497		CYR61	COBLL1
	MBOAT2		MIR7111	LOC100506127		CYSLTR2	COL18A1
	MED20		MLPH	LOC101927318		DAPK2	COLCA1
	MEFV		MMD	LOC101927751		DARS2	COLCA2
	MELTF		MPST	LOC101929516		DAW1	COLEC10
	METRNL		MRPL23	LOC102724580		DCLK1	COLQ
	MEX3C		MRPL52	LOC105371998		DCLRE1A	COMMD7
	MGAT4A		MT1E	LOC642852		DCLRE1B	COPG1
	MIA-RAB4B		MT2A	LOC730101		DCTN5	COPG2
	MICALCL		MUC1	LPAR1		DDAH1	CORIN
	MIR100HG		MVK	LRCH3		DDIAS	CORO1A
	MIR147B		MYL9	LRP12		DDX18	CORO2A
	MKNK2		NAGPA	LRP6		DDX20	CPNE4
	MMD		NAPSA	LRP8		DDX3X	CRABP2
	MMP15		NCF2	LRRC4		DDX3Y	CRACR2B
	MOB1A		NFATC2	LRRK1		DENND5B	CRAT
	MOB3A		NFE2	LTC4S		DEPDC5	CRB2
	MPZL2		NMB	LVRN		DFFA	CRB3
	MROH7		NMU	MACROD2		DGAT2	CREB3L2
	MTSS1L		NOP53	MAGI3		DHFR	CRIPAK
	MUC5AC		NOX5	MAN2A2		DHFR2	CRNDE
	MXD1		NPBWR1	MANEA		DHX57	CRYL1
	MYO15B		NR1H2	MAP2		DIAPH2	CRYM
	MYOM1		NRTN	MAP2K4		DIAPH3	CSK
	MYZAP		NUAK2	MAPKAP1		DISC1	CTC-338M12.4
	N4BP3		ODF3B	MAPKAPK2		DIXDC1	CTF1
	NCOA7		P2RY11	MASP2		DNA2	CTH
	NDRG1		PALM3	MAVS		DNAH2	CTSK
	NDUFA4L2		PARP11	MBD5		DNAH6	CUL7
	NECTIN4		PBXIP1	MBOAT1		DNMT1	CWC27
	NEIL2		PDCD1LG2	MCU		DNMT3B	CXCL8
	NEK3		PDCD4	MGA		DOCK10	CXCR5
	NEURL1B		PDP1	MID1		DOCK3	CYB561D2
	NFKBIA		PHLDA3	MIEF1		DPF1	CYB5R3
	NIPA1		PLA2G15	MIR31HG		DPH6	CYBA
	NKPD1		PLA2G16	MIR924HG		DPP4	CYHR1
	NORAD		PLA2G4C	MKI67		DPY19L1	CYP1A1
	NOXA1		PLAC1	MKNK2		DPY19L2P2	CYP27A1
	NPNT		PLLP	MLEC		DPYSL2	CYP2D7
	NR4A2		PLXNC1	MLLT6		DSC2	CYP2E1
	NXPH4		PNMA2	MMGT1		DSCC1	CYP2S1
	NYAP1		POLE4	MMP7		DTL	CYP4X1
	ODF3B		PON2	MST1R		DTNA	CYSTM1
	OLFM2		PON3	MTHFD2L		DUBR	D2HGDH
	OVOL1		PPFIBP2	MUC5AC		DUSP1	DBNDD1
	P4HA1		PPP1R1C	MYO15B		DUSP2	DBP
	P4HA2		PRELID2	MYO9B		DYRK3	DCAF4L1
	PADI1		PRR22	NAB1		DZANK1	DCAKD
	PADI2		PRR29	NEBL		DZIP1L	DCST2
	PADI3		PRR5L	NECTIN1		E2F1	DDIT3
	PALM		PRSS53	NEDD4		E2F2	DDIT4
	PAQR5		PRTFDC1	NEO1		E2F5	DEDD2
	PBXIP1		PSMB10	NFIX		E2F7	DENND1A
	PDGFA		PSTK	NHS		E2F8	DENND1C
	PDK4		PTGES3L	NHSL1		EDN2	DENND6B
	PDZK1IP1		RAD51B	NIPA1		EFCAB2	DERL1
	PECAM1		RAET1E	NIPSNAP3B		EFHC1	DGKA
	PER1		RAMP1	NKTR		EFNB2	DGUOK-AS1
	PFKFB3		RASD1	NLN		EGLN3	DHCR24
	PHC2		RASD2	NOSTRIN		EID2	DHRS11
	PIM1		RASGEF1C	NPHP3		EIF3C	DHRS12
	PITX1		RASL11A	NR6A1		EIF3CL	DHRS3
	PKP2		RDH5	NRAV		EIF4G1	DHRS9
	PLAUR		RELB	NRBP2		EIF5A2	DIABLO
	PLCD1		RERG	NSD2		ELAC1	DICER1-AS1
	PLCH2		RHEBL1	NSD3		ELMOD1	DIRAS3
	PLEKHA2		RN7SL3	NSMF		EN2	DKK1
	PLEKHG5		RNASEH2B	NTRK2		ENOSF1	DLG3
	PLEKHG6		RPL10A	OGDH		ENSA	DMPK
	PLIN2		RPL13	OSBPL8		ENTPD1	DMTN
	PLXNA1		RPL13A	PABPC4		EOGT	DNAH17
	POLD4		RPL13AP20	PADI2		EOMES	DNAJC19
	POLH		RPL13AP5	PANX2		EPB41L2	DNAJC27-AS1
	PPFIA4		RPL18	PARN		EPC1	DNAJC3-AS1
	PPM1J		RPL18A	PARVB		EPDR1	DNAJC4
	PQLC3		RPL22L1	PASK		EPG5	DNAJC7
	PRKCG		RPL28	PCDHA7		EPM2A	DNASE1
	PRSS53		RPL32	PCDHB13		EPSTI1	DNER
	PTAFR		RPL34	PCDHB8		ERCC4	DOK7
	PTGS2		RPL35	PCMTD2		ERCC6	DPCD
	PTK6		RPL9	PDE8A		ERCC6L	DPM3
	PTPRH		RPLP1	PDIK1L		ERCC6L2	DPYSL5
	PXDC1		RPLP2	PEAK1		ERI2	DRAP1
	PXYLP1		RPS10	PEBP1		ERVMER34-1	DTX2
	RAB12		RPS12	PFKFB2		ESCO2	DUSP5P1
	RAB27A		RPS15	PGBD4		ESPL1	DUSP8
	RAB3D		RPS19	PHF2		EVA1A	ECI1
	RAB4B		RPS21	PHF20L1		EXO1	EDNRA
	RAB8B		RPS27L	PHTF2		EXO5	EFEMP2
	RAC2		RPS29	PIP5K1C		EXOG	EFHD2
	RAPGEF5		RPS3	PIPOX		F2RL1	EFNA2
	RELL1		RPS5	PITHD1		F2RL3	EFR3B
	REPS2		RPS9	PITX2		F5	EGFL7
	RGS9		RRAD	PIWIL4		FABP5	EHF
	RHBDF2		SAP25	PKIA		FABP6	EIF3E
	RHOU		SCAMP5	PLA2G2A		FAIM	EIF4EBP1
	RHOV		SCARNA13	PLCB4		FAM103A1	EIF4G3
	RIMKLA		SCN1B	PLCH1		FAM111B	ELF3
	RIMS3		SDR16C5	PLEC		FAM114A2	ELMO3
	RNASE1		SEMA7A	PLEKHH2		FAM127C	EML2-AS1
	RNASE4		SH2D5	PLEKHM1P1		FAM13C	ENKD1
	RNASET2		SIK1	PLXNA3		FAM169A	ENO3
	RORC		SLC15A3	PM20D2		FAM172BP	ENTPD2
	RPS6KA2		SLC27A5	PPFIA1		FAM225A	ENTPD4
	RRAS		SLC2A12	PPIP5K1		FAM225B	EPCAM
	RTN4R		SLC35D2	PPM1L		FAM46B	EPHA1
	RTN4RL2		SLC37A2	PPP1R12B		FAM57A	EPHA1-AS1
	S100A14		SLC38A9	PPP3CB		FANCA	EPHX2
	S100P		SLCO2A1	PPTC7		FANCB	EPS8L1
	SAA1		SMAGP	PRKCA		FANCG	ERV3-1
	SAA2		SMIM5	PRMT6		FANCM	ERV3-1-ZNF117
	SAA2-SAA4		SMN1	PSD4		FAT1	ESPN
	SAT1		SMN2	PTGS2		FAT2	ETHE1
	SDCBP2		SMPD1	PTP4A2		FAT4	EVADR
	SEC14L2		SMPDL3A	PTPN21		FAXDC2	EXD3
	SEMA3B		SNHG16	PTPN4		FBN2	EXOC3L4
	SEMA4G		SNHG5	PTPRK		FBXL18	EXOSC7
	SERPINE2		SNHG7	PTPRS		FBXO48	F11R
	SGK1		SNHG8	PVRIG2P		FBXW7	FA2H
	SGK2		SOCS1	RAE1		FEN1	FAAH2
	SHC3		SORBS1	RALBP1		FER1L6	FAHD2B
	SI		SPHK1	RALGPS1		FERMT2	FAHD2CP
	SIK1		ST6GALNAC6	RAP2A		FGF1	FAM114A1
	SLC17A5		SYNPO	RBBP7		FGFR1OP2	FAM117A
	SLC22A20		SYTL3	RFLNA		FHOD3	FAM129A
	SLC25A30		TERC	RHOU		FICD	FAM129B
	SLC25A37		TEX19	RUFY3		FIGNL1	FAM189A2
	SLC29A4		TFR2	RXRA		FIRRE	FAM213A
	SLC2A10		TGFB1I1	SAMD12		FKBP5	FAM214B
	SLC45A3		TGFB2-OT1	SAP30L-AS1		FKRP	FAM219B
	SLC47A2		TGFBR1	SARAF		FLG	FAM3A
	SLC6A8		TMEM117	SDPR		FLJ22447	FAM3D
	SLC9A3-AS1		TMEM126A	SEC31B		FLNA	FAM81A
	SLCO4A1		TMEM14B	SEL1L3		FLVCR2	FAM83B
	SLCO4A1-AS1		TMEM158	SEMA3A		FMR1NB	FAM83E
	SLITRK4		TMEM229B	SERINC4		FN3KRP	FAM89B
	SLITRK5		TMEM265	SERINC5		FNIP2	FAM8A1
	SLPI		TMEM45B	SERPINE2		FOXD4	FAR2P1
	SMARCA2		TMUB1	SGPP1		FOXE1	FARP1
	SMIM14		TNFRSF6B	SH3GL1		FOXM1	FARP2
	SOD2		TOMM34	SHANK2		FOXP1	FBLIM1
	SPHK1		TOR2A	SHANK3		FOXR2	FBP1
	SPNS2		TPGS1	SHTN1		FOXRED2	FBXL2
	SQOR		TPPP3	SIPA1L2		FPR1	FBXL8
	SRMS		TRIM55	SIPA1L3		FRS2	FBXO16
	SRP14-AS1		TSPO	SIVA1		FSBP	FBXO24
	STMN3		TYMP	SLC12A2		FSD1	FBXO38
	STS		VIM	SLC17A5		FTO-IT1	FBXO44
	SULT2B1		VIM-AS1	SLC25A44		FTSJ3	FBXO6
	SUSD2		VKORC1	SLC36A1		FUBP1	FCGRT
	SWAP70		VSTM2L	SLC3A2		FUT4	FCHO1
	SYNGR1		WDR38	SLC4A4		FXN	FGF11
	SYTL3		WFDC3	SLC7A5		FYCO1	FGF19
	TCF7L1		YBEY	SLITRK5		G3BP1	FGFR3
	TCP11L1		YPEL3	SLITRK6		GAB3	FIBCD1
	TESK2		ZBTB47	SMG1P3		GABRB3	FLJ12825
	TGFBR3		ZC4H2	SNAP29		GATM	FLJ31356
	TMCC3		ZNF404	SNHG4		GBA	FLJ46906
	TMEM144		ZNF548	SNX13		GBAP1	FLYWCH1
	TMEM159		ZNF585A	SNX19		GBP1	FMNL1
	TMEM171		ZSWIM4	SOGA1		GDAP1	FMNL3
	TMEM44			SOX2		GEMIN5	FMO5
	TMEM45B			SPANXB1		GEMIN6	FN3K
	TMEM51-AS1			SPATA13		GEN1	FNDC11
	TMEM8B			SPRED1		GFM1	FOXE3
	TMPRSS11E			SPTBN1		GIMAP2	FOXH1
	TNFAIP2			SPTSSA		GINS1	FOXJ1
	TNFAIP3			SPTSSB		GINS2	FOXP4-AS1
	TNFAIP8			SRP9		GINS3	FTCD
	TNFRSF25			SSFA2		GINS4	FTH1
	TNIP3			SSH3		GJD3	FUCA1
	TNNT2			ST6GALNAC3		GLB1L2	FUT1
	TP53INP1			STAG3L1		GLDC	FUT3
	TREM1			STAG3L3		GLO1	FUT8
	TRIM7			STAG3L5P		GLYR1	FXR1
	TSSK3			STAG3L5P-PVRIG2P-PILRB		GMFB	FXYD3
	TTC21A			STK26		GMNN	GAB2
	TWSG1			SUCLA2		GNB4	GAD1
	TXNIP			SYK		GNG2	GADD45A
	TYMP			SYNE2		GOLGA8A	GAL3ST4
	UBE2H			SYT16		GPLD1	GALK2
	USP38			SYT17		GPR137C	GARS
	VAC14-AS1			TAF5L		GPR176	GAS6-AS1
	VEGFA			TAOK1		GPR183	GATA6-AS1
	VPS37D			TBCK		GPR68	GATD1
	VSIG10			TBX19		GPS2	GCNA
	WBP2			TGFBRAP1		GSG2	GDF15
	WDR72			THAP9		GSTCD	GEMIN8
	XDH			TIMM17B		GTF2H2	GFPT1
	YPEL1			TLR4		GTF2H2C	GGACT
	YPEL2			TMED10P1		GTF3C6	GGT1
	YPEL3			TMED8		GTPBP8	GIPR
	YPEL5			TMEFF1		GUSBP1	GJB2
	ZBTB46			TMEM154		GXYLT1	GJB3
	ZC3H12A			TMEM183A		HACL1	GJB5
	ZMIZ1-AS1			TMEM183B		HAT1	GLTP
	ZNF667			TMEM198		HAUS2	GMDS
	ZNF83			TMEM241		HAUS8	GMDS-AS1
	ZNF862			TMEM30B		HECTD2	GMPPA
				TMEM44		HECW2	GMPR2
				TMPRSS11E		HEG1	GNAI1
				TMPRSS4		HELLS	GNAO1
				TMTC2		HERC1	GNAQ
				TOB1		HERC2	GNB1L
				TOB2		HERC2P2	GNRH1
				TRAM1L1		HERC2P3	GOLGA2
				TRIM37		HIPK3	GOLGA5
				TRIM66		HIST1H2BC	GOLGA7B
				TRRAP		HIST1H2BJ	GOLT1A
				TSIX		HIST1H2BK	GPC1
				TSPAN3		HIVEP3	GPC2
				TTC28-AS1		HPRT1	GPC4
				TTC9		HRCT1	GPR153
				TTYH3		HRH1	GPT2
				TUBB3		HRNR	GPX1
				TWSG1		HS1BP3-IT1	GPX2
				TXNRD3		HSD17B10	GRAMD2
				UBE2W		HSPA14	GRB7
				UBR3		HTATSF1P2	GRIN3B
				UCHL5		IFFO2	GRK3
				UQCRFS1		IGF1	GRK6
				USP13		IGFBP1	GRTP1
				USP25		IGFBP3	GSDMB
				USP40		IKBIP	GSDMC
				USP9X		IKZF3	GSEC
				VEGFC		IL1RAP	GSTA4
				VTN		IL22RA1	GSTK1
				WASF1		IL6	GSTP1
				WRB		IL6ST	GSTT1
				WRB-SH3BGR		IL7	GTF2IP20
				WWC2		IPW	GTF2IRD1
				WWC3		IRAIN	GTF2IRD2
				WWP2		ISPD	GTF2IRD2B
				XIST		ITFG2	GUCA1B
				YY2		ITGB3	GUCY1B3
				ZBED4		ITGB7	H2AFJ
				ZC3H13		ITPR1	HAGH
				ZCCHC2		ITSN2	HAGHL
				ZDHHC21		JADE1	HAS3
				ZFP36L2		JAM3	HAX1
				ZMPSTE24		JAZF1	HBP1
				ZMYND8		JUN	HCAR2
				ZNF107		KALRN	HCAR3
				ZNF117		KANK1	HCG27
				ZNF131		KBTBD8	HDAC4
				ZNF135		KCNC3	HDAC5
				ZNF185		KCNQ3	HDAC6
				ZNF317		KDM4C	HDAC9
				ZNF337-AS1		KDM8	HDLBP
				ZNF367		KIAA0825	HEMK1
				ZNF443		KIAA1462	HEPH
				ZNF506		KIAA1524	HERPUD1
				ZNF516		KIF13A	HES1
				ZNF609		KIF1B	HES2
				ZNF618		KIF24	HES6
				ZNF664		KIRREL	HEXIM1
				ZNF704		KLF2	HEY1
				ZNF77		KLHL35	HID1
				ZNF778		KLHL4	HIST3H2A
				ZNF782		KLRC2	HLA-F-AS1
				ZNF800		KLRC3	HMCN2
				ZSCAN31		KLRG1	HMGCL
				ZSWIM5		KPNA3	HNMT
						KPNA5	HOMER3
						KPNA7	HOTS
						KRBOX4	HPGD
						LAMC3	HPN
						LAMP3	HS3ST1
						LANCL2	HS6ST1
						LCTL	HSD17B13
						LDB3	HSD3BP4
						LEPROT	HSF2
						LETM2	HSF4
						LGALS2	HSH2D
						LHFP	HSPA1B
						LIG1	HSPA2
						LIMK2	HSPE1
						LIN54	ICA1
						LIN9	ICAM5
						LINC00221	IDH2
						LINC00346	IDO1
						LINC00460	IER5L
						LINC00511	IFNE
						LINC00628	IFT43
						LINC00638	IGIP
						LINC00680	IGSF1
						LINC00680-GUSBP4	IGSF8
						LINC00880	IL10RB
						LINC00922	IL11
						LINC00941	IL15RA
						LINC01116	IL1RN
						LINC01128	IL20RB
						LINC01184	IL36RN
						LINC01234	ILDR1
						LINC02015	IMMP2L
						LINC02029	INAFM1
						LOC100130111	INF2
						LOC100132111	ING4
						LOC100499489	INHBB
						LOC100505715	INSIG1
						LOC100506178	INSL3
						LOC100506688	IRF5
						LOC101927027	IRF6
						LOC101927136	IRF7
						LOC101927911	ISG15
						LOC101928728	ITGA2B
						LOC101929057	ITGA6
						LOC101930085	ITGA7
						LOC102723373	ITGB5
						LOC102723729	ITGB6
						LOC102724153	ITPRIP
						LOC102724927	ITSN1
						LOC105369438	IZUMO4
						LOC105370526	JAKMIP3
						LOC105374952	JDP2
						LOC105376554	JTB
						LOC145694	KANK2
						LOC399975	KAT8
						LOC441455	KATNBL1
						LOC645166	KCNJ14
						LOC728485	KCNMB4
						LOC730102	KCTD13
						LONRF2	KDELR3
						LPAL2	KDM6B
						LPCAT2	KIAA0513
						LRRC37A6P	KIAA1024
						LRRCC1	KIAA1211L
						LTV1	KIAA1522
						LUCAT1	KIF21B
						LUM	KIF5B
						LYPD5	KIFC2
						LYRM4-AS1	KLC3
						LYSMD2	KLF5
						MAMLD1	KLHDC7A
						MANEAL	KLHDC9
						MAP1A	KLHL13
						MAP2K6	KLHL2
						MAP3K1	KLK8
						MAP3K20-AS1	KMT2E-AS1
						MAP3K7CL	KNDC1
						MAP7D2	KREMEN2
						MAPK9	KRT15
						MAPRE1	KYAT1
						MARC1	L3MBTL1
						MARCH4	LARP6
						MARCH8	LCAT
						MARS2	LCORL
						MASTL	LDOC1
						MATN3	LENG8-AS1
						MBNL1	LEPR
						MBNL1-AS1	LFNG
						MBNL3	LGALS1
						MCM10	LGALS9
						MCM2	LGSN
						MCM3	LHPP
						MCM4	LIN37
						MCM5	LINC00173
						MCM6	LINC00174
						MCM8	LINC00339
						MCM9	LINC00342
						MCOLN1	LINC00482
						MDFIC	LINC00518
						MDM1	LINC00622
						MECOM	LINC00623
						MED12	LINC00641
						MEST	LINC00659
						METTL12	LINC00663
						MFAP3	LINC00869
						MFSD1	LINC00887
						MFSD11	LINC00910
						MGLL	LINC01001
						MGME1	LINC01002
						MICAL3	LINC01006
						MIER3	LINC01011
						MIPEP	LINC01023
						MIR147B	LINC01088
						MIR22HG	LINC01089
						MIR3648-1	LINC01123
						MIR3648-2	LINC01207
						MIR6516	LINC01338
						MIS18BP1	LINC01481
						MITF	LINC01503
						MLH1	LINC01537
						MLLT10	LINC01759
						MMD	LINC01844
						MMP16	LINC01970
						MMS22L	LINC02035
						MNS1	LIPA
						MOCS3	LIPH
						MPDZ	LLGL2
						MPP1	LMF1
						MPP6	LMNTD2
						MRM2	LMTK3
						MSH2	LOC100128288
						MSRB3	LOC100128770
						MTAP	LOC100130417
						MTBP	LOC100130744
						MTFR2	LOC100130987
						MTG1	LOC100134317
						MTHFD1	LOC100287497
						MTMR6	LOC100288798
						MTMR8	LOC100506548
						MTOR	LOC100507291
						MTR	LOC100507507
						MTSS1	LOC101927043
						MUC1	LOC101927318
						MVB12B	LOC101927751
						MYB	LOC101927954
						MYBL1	LOC101928034
						MYBL2	LOC101928238
						MYC	LOC101928464
						MYH15	LOC101928659
						MYL9	LOC101929243
						MYLK	LOC101929705
						MYO19	LOC102724580
						MYO1B	LOC102724890
						N4BP2	LOC102724957
						NAAA	LOC105371703
						NAF1	LOC105371998
						NAGPA	LOC105374546
						NAPSA	LOC105376805
						NAT1	LOC105378853
						NAV3	LOC155060
						NCAPD3	LOC171391
						NCF2	LOC284412
						NCOA5	LOC400927
						NCR3LG1	LOC401261
						NDC1	LOC401320
						NDST1	LOC440173
						NDST3	LOC606724
						NDUFAF6	LOC644794
						NEB	LOC728392
						NEIL3	LOC728730
						NEMP1	LOC728975
						NFATC2IP	LOC729737
						NIN	LOC730098
						NIPAL1	LOC730338
						NKIRAS1	LPAR1
						NMU	LPCAT4
						NOCT	LRAT
						NOL9	LRRC28
						NOLC1	LRRC37A3
						NOMO3	LRRC4
						NOP56	LRRC75B
						NOS1AP	LSMEM1
						NOV	LTBP3
						NOX5	LTC4S
						NPAT	LVRN
						NPBWR1	LY6D
						NPR3	LYPD6B
						NRK	LYRM9
						NRP1	LZTS3
						NSF	MACROD1
						NSFP1	MACROD2
						NSMAF	MAGED1
						NUDT15	MAGED2
						NUP153	MAJIN
						NUP155	MAP2
						NUP160	MAP2K3
						NUP205	MAP2K4
						NUP35	MAPK10
						NUP58	MAPK15
						NUP98	MAPK8IP2
						OAS3	MAPKAP1
						ODC1	MAPKAPK2
						OLFML2A	MARCH2
						ONECUT2	MASP2
						OR56A3	MB
						ORC1	MBOAT1
						ORC5	MCEE
						OSMR	MCU
						OSTM1	MEF2B
						OTOGL	MEIS3
						OTUD6B	METRNL
						PAK1IP1	METTL21A
						PALB2	MFAP2
						PARP1	MFF
						PARP12	MFSD3
						PARPBP	MFSD4A
						PASK	MGAT3
						PAX8	MGAT4A
						PBRM1	MGMT
						PCDH7	MHENCR
						PCGF6	MIA-RAB4B
						PCLAF	MIB2
						PCNA	MICALCL
						PCNA-AS1	MICALL2
						PCNT	MID1IP1
						PCNX4	MIEN1
						PDCD1LG2	MINCR
						PDE12	MIPOL1
						PDE7A	MIR200CHG
						PDGFD	MIR205
						PDK1	MIR205HG
						PDK2	MIR210HG
						PDPR	MIR3064
						PDSS1	MIR31HG
						PEG10	MIR3615
						PEX26	MIR497HG
						PEX3	MIR612
						PFAS	MIR6887
						PFKFB3	MISP3
						PGAM5	MKNK2
						PGBD3	MLEC
						PGGT1B	MLLT6
						PHLDB2	MLXIPL
						PIGW	MMP11
						PINX1	MMP15
						PKMYT1	MMP24-AS1
						PLAC1	MMP7
						PLAGL2	MORN4
						PLBD2	MOSPD3
						PLCL2	MOXD1
						PLEKHA5	MPG
						PLEKHG4	MROH7
						PLK4	MRPL23-AS1
						PLOD2	MRPS6
						PLPP3	MSS51
						PLSCR4	MST1
						PLXNC1	MTHFD2
						PNMA2	MTHFD2L
						PNPO	MTMR9LP
						POFUT1	MUC20
						POLA1	MUC4
						POLD3	MUC5AC
						POLE	MVD
						POLE2	MXD1
						POLE3	MXD3
						POLQ	MXD4
						POLR1A	MXRA8
						POLR1E	MYDGF
						POLR2A	MYH11
						POLR3C	MYH14
						POLR3G	MYO15B
						PON2	MYRF
						PON3	MYZAP
						POT1-AS1	NAPRT
						POU6F2-AS2	NARFL
						PPP1R12A	NAT14
						PPP1R1C	NBEA
						PPP2R1B	NBR2
						PPT1	NCALD
						PRDM13	NCCRP1
						PRELID2	NEBL
						PRICKLE1	NECTIN1
						PRIM1	NECTIN4
						PRIM2	NEDD4
						PRKAR2A	NEURL1B
						PRKDC	NFATC4
						PRPS1	NFIX
						PRPS1L1	NGFR
						PRRG1	NHSL1
						PRSS35	NINJ1
						PRTFDC1	NIPA1
						PSG1	NIPSNAP3B
						PSG6	NLN
						PSME3	NME3
						PSPC1	NMRK1
						PTDSS1	NOTCH3
						PTGES3L	NOXA1
						PTPRK	NPDC1
						PUS3	NPIPB15
						PXDN	NPR2
						RAB31	NR1H3
						RABEP1	NR2F1-AS1
						RAD18	NR4A1
						RAD51	NR5A2
						RAD51B	NR6A1
						RAD51D	NRBP2
						RAD54B	NSMF
						RAD54L	NTF4
						RAET1E	NTN1
						RANBP6	NTN5
						RASAL2	NTNG1
						RASAL2-AS1	NTRK2
						RB1	NXPH4
						RBL1	OAF
						RBM19	OASL
						RBM45	OAT
						RECK	OAZ1
						RELL1	OBSL1
						RERG	OCEL1
						RFC2	OGFRL1
						RFC3	OLFM2
						RFC5	OLMALINC
						RFT1	OR7E14P
						RHEBL1	OSBPL7
						RHOB	OSER1-AS1
						RIBC2	OSGIN1
						RIF1	OVGP1
						RIOX1	P3H3
						RMDN2	P4HTM
						RMI2	PACSIN1
						RNASEH2B	PACSIN2
						RNF213	PACSIN3
						RNF216P1	PADI1
						RNF219-AS1	PADI2
						ROR1	PADI3
						RPA2	PAK1
						RPL22L1	PAK4
						RPLP0P2	PALD1
						RPS6KA5	PALM
						RPS6KL1	PANX2
						RRAD	PAQR6
						RRM2	PAQR8
						RRS1	PARVB
						RTTN	PAX9
						RUNX1	PAXIP1-AS1
						S1PR3	PCAT6
						SACS	PCK2
						SAMD15	PCOTH
						SASS6	PCSK1N
						SCAMP5	PCSK4
						SCARNA16	PCYT2
						SCML1	PDE2A
						SCML2	PDE3A
						SCN2A	PDE4DIP
						SDAD1P1	PDE9A
						SDC3	PDGFA
						SDCBP2-AS1	PDGFB
						SDR16C5	PDXDC2P-NPIPB14P
						SELPLG	PDXK
						SEMA3G	PDZD7
						SEMA6D	PEAK1
						SEMA7A	PEBP1
						SENP1	PER1
						SERTAD4	PGPEP1
						SETD9	PHF2
						SFPQ	PHGDH
						SFTA3	PHLDA2
						SFTPA1	PHLDB3
						SFXN5	PHYHD1
						SH3PXD2A-AS1	PID1
						SH3TC2	PIGL
						SHCBP1	PIK3CD
						SIGMAR1	PIK3IP1
						SKA3	PILRB
						SKP2	PIPOX
						SLAMF7	PIR
						SLC12A8	PIR-FIGF
						SLC16A10	PITHD1
						SLC16A6	PITPNM1
						SLC19A1	PITRM1
						SLC23A2	PITRM1-AS1
						SLC24A2	PITX1
						SLC29A1	PLA2G4A
						SLC29A3	PLA2G4B
						SLC2A5	PLCG2
						SLC30A1	PLCH2
						SLC30A4	PLEKHA2
						SLC35B4	PLEKHG5
						SLC35D1	PLEKHH2
						SLC35D2	PLEKHH3
						SLC35E3	PLEKHM1P1
						SLC35F5	PLPP5
						SLC38A4	PLXNA3
						SLC38A7	PLXNB1
						SLC38A9	PLXNB2
						SLC40A1	PMM1
						SLC4A8	PNKD
						SLC51B	POLD4
						SLC9A6	POLR1D
						SLCO2A1	POLR2J2
						SLF1	POLR3GL
						SLX4IP	POMT1
						SMA5	PPDPF
						SMARCA5-AS1	PPIEL
						SMC1A	PPM1J
						SMC1B	PPM1K
						SMC2	PPM1M
						SMCHD1	PPM1N
						SMIM10	PPP1R12B
						SMPDL3A	PPP1R32
						SNAI2	PPP1R3E
						SNORA63B	PPP2R5B
						SNORD116-12	PPP3CB
						SNORD116-23	PRDM12
						SNORD116-4	PRDM2
						SNORD17	PRKCA
						SNORD2	PRKCG
						SNORD44	PRKCH
						SNORD76	PRKD1
						SNORD78	PROCA1
						SNORD86	PROM2
						SON	PRPF40B
						SORBS1	PRR36
						SP140	PRSS12
						SP5	PRSS16
						SPAG1	PRSS30P
						SPATA33	PRSS8
						SPATA5	PRX
						SPRN	PSAT1
						SPTLC3	PSCA
						SSC5D	PSMG3-AS1
						ST3GAL2	PSPH
						STAG1	PTAFR
						STAG3	PTGES
						STXBP4	PTGR2
						STXBP5	PTGS1
						SUSD1	PTGS2
						SUV39H1	PTK6
						SUV39H2	PTP4A2
						SUZ12	PTP4A3
						SVIL-AS1	PTPN4
						SYBU	PTPRD
						SYCP2	PTPRH
						SYNJ2	PTPRS
						SYNM	PTPRZ1
						SYNPO	PTS
						SYT10	PVRIG2P
						TADA2A	PWWP2B
						TAF5	PYCR1
						TANGO6	PYROXD2
						TARBP1	QPCTL
						TCF4	RAB11FIP4
						TCOF1	RAB25
						TECPR2	RAB26
						TERC	RAB4B
						TERT	RAB6B
						TET1	RAC3
						TEX15	RAE1
						TEX2	RALBP1
						TFDP1	RALGPS1
						TFR2	RAP1GAP
						TGFB2	RAPGEF3
						TGFBI	RAPGEF4
						TGFBR1	RASA4
						TGFBR2	RASA4B
						TGFBR3	RASGEF1B
						THAP10	RASSF7
						THBS1	RBAK-RBAKDN
						THEM5	RBBP8NL
						THRIL	RBM46
						TIAM2	RBPMS
						TIGAR	RCOR2
						TIMELESS	RDH16
						TIMM23B	RDM1
						TIMM8A	REEP6
						TIPIN	RGS10
						TK1	RGS14
						TLN2	RGS2
						TLR3	RGS20
						TMCO4	RGS3
						TMEM109	RHBDF1
						TMEM110-MUSTN1	RHBDL1
						TMEM117	RHOU
						TMEM140	RHPN1
						TMEM14B	RNASE1
						TMEM158	RNASE4
						TMEM199	RNASEK-C17orf49
						TMEM201	RND1
						TMEM209	RNF112
						TMEM245	RNF122
						TMEM75	RNF144B
						TMPO	RNF208
						TMX4	RNPC3
						TNFRSF1B	RNPEPL1
						TNRC6A	RNR2
						TNS4	RPARP-AS1
						TOE1	RPL22
						TOMM34	RRAS
						TONSL	RRNAD1
						TONSL-AS1	RSAD2
						TOPBP1	RSG1
						TOR1AIP2	RSRP1
						TPM3P9	RTN2
						TPPP	RTN4R
						TPRKB	RWDD2A
						TRAIP	RXRA
						TRAPPC13	S100A13
						TRIM16L	S100A14
						TRIM55	S100A2
						TRIP13	S100A4
						TRMO	S100A6
						TRMT12	S100P
						TRMT13	SALL4
						TRMT6	SARAF
						TSACC	SARS
						TSEN2	SAT1
						TSNAX-DISC1	SBK1
						TTC26	SCARF2
						TTC30A	SCG2
						TTC30B	SCHLAP1
						TTF2	SCNN1D
						TTL	SCRN2
						TTLL11	SDCBP2
						TTPAL	SDHAF4
						TUBB	SEC31B
						TUBB1	SEL1L3
						TUBGCP5	SELENOM
						TYMS	SELENOW
						TYMSOS	SEMA3B
						UBAP2	SEMA3F
						UBE2D4	SEMA4A
						UBL7-AS1	SERGEF
						UCN2	SERINC2
						UHRF1	SERINC4
						ULBP3	SERINC5
						ULK4	SERPINE2
						UMPS	SERPINF1
						UNK	SESN2
						URB2	SEZ6L2
						USP31	SGK1
						USP51	SGK2
						USP6NL	SGSM3
						UTP14A	SH2D2A
						UTP20	SH3BP2
						UTP4	SH3GL1
						VANGL1	SH3YL1
						VASH2	SHANK2
						VGLL3	SHC2
						VIL1	SHISA3
						VIM	SIAH2
						VIM-AS1	SIGIRR
						VPS33A	SIPA1
						VPS50	SIVA1
						VRK1	SLAMF9
						WASHC5	SLC12A4
						WDCP	SLC12A6
						WDHD1	SLC15A2
						WDR4	SLC16A4
						WDR76	SLC16A5
						WDR81	SLC17A5
						WDR92	SLC19A2
						WIPF1	SLC1A4
						WTAP	SLC1A5
						XK	SLC22A18
						XPO4	SLC22A23
						XRCC2	SLC22A31
						XYLB	SLC25A21
						ZAK	SLC25A29
						ZBED6CL	SLC26A6
						ZBTB38	SLC27A1
						ZBTB39	SLC29A4
						ZBTB47	SLC2A1-AS1
						ZBTB8B	SLC35A2
						ZC3H12B	SLC39A4
						ZC3HAV1L	SLC3A2
						ZCCHC4	SLC47A2
						ZFAND4	SLC4A11
						ZFYVE16	SLC4A3
						ZFYVE26	SLC50A1
						ZGRF1	SLC5A10
						ZIK1	SLC6A8
						ZIM2-AS1	SLC7A5
						ZNF107	SLC8A2
						ZNF112	SLC9A1
						ZNF141	SLC9A3-AS1
						ZNF154	SLC9A3R1
						ZNF157	SLC9B1
						ZNF229	SLCO4A1
						ZNF235	SLCO4A1-AS1
						ZNF239	SLFNL1
						ZNF268	SLITRK5
						ZNF280B	SLITRK6
						ZNF280D	SMAD9
						ZNF304	SMARCD3
						ZNF326	SMCO4
						ZNF331	SMIM1
						ZNF33B	SMIM10L2A
						ZNF343	SMIM14
						ZNF37A	SMIM19
						ZNF37BP	SMIM22
						ZNF407	SMOX
						ZNF44	SMYD3
						ZNF445	SNAI3
						ZNF45	SNAP29
						ZNF451	SNHG18
						ZNF462	SNHG19
						ZNF474	SNORA18
						ZNF488	SNORA8
						ZNF519	SNORD58B
						ZNF530	SNX24
						ZNF548	SOHLH2
						ZNF551	SOX13
						ZNF587B	SOX2
						ZNF594	SPACA6
						ZNF596	SPAG4
						ZNF619	SPANXA1
						ZNF620	SPANXA2
						ZNF678	SPANXB1
						ZNF681	SPDEF
						ZNF689	SPEG
						ZNF695	SPERT
						ZNF70	SPON2
						ZNF708	SPTSSB
						ZNF714	SQOR
						ZNF718	SRCIN1
						ZNF738	SREBF1
						ZNF765	SRGAP3
						ZNF772	SRP9
						ZNF8	SSH3
						ZNF829	ST20
						ZNF860	ST3GAL3
						ZNF883	ST3GAL4
						ZNF93	ST3GAL5
						ZNRF2P1	ST6GALNAC2
						ZSCAN2	ST6GALNAC3
						ZSCAN25	STAC3
						ZSCAN5A	STAG3L5P-PVRIG2P-PILRB
						ZWILCH	STAP2
						ZWINT	STARD10
							STC2
							STEAP1
							STEAP3
							STK32A
							STK32C
							STK39
							STMN3
							STN1
							STRA6
							STRCP1
							SUCLA2
							SULT1E1
							SULT2B1
							SWI5
							SYCE1L
							SYCP2L
							SYK
							SYNGR1
							SYT1
							SYT17
							SYT7
							SYTL1
							SYTL4
							TARS
							TAX1BP3
							TBC1D10A
							TBC1D26
							TBX19
							TBXAS1
							TC2N
							TCTEX1D2
							TEAD2
							TEPP
							TFAP2C
							TFEB
							TGIF1
							THAP9
							TIAF1
							TIMM17B
							TINAGL1
							TINCR
							TJP3
							TLE6
							TLR9
							TM4SF19
							TM4SF19-AS1
							TM4SF19-TCTEX1D2
							TM4SF1-AS1
							TM7SF2
							TM9SF4
							TMC4
							TMC6
							TMED3
							TMEFF1
							TMEM105
							TMEM125
							TMEM129
							TMEM134
							TMEM156
							TMEM159
							TMEM161B-AS1
							TMEM178A
							TMEM183A
							TMEM183B
							TMEM187
							TMEM198
							TMEM216
							TMEM225B
							TMEM255B
							TMEM256
							TMEM30B
							TMEM39A
							TMEM40
							TMEM44
							TMEM52
							TMEM61
							TMEM71
							TMEM80
							TMEM81
							TMEM86B
							TMEM8B
							TMEM91
							TMPRSS11E
							TMPRSS13
							TMPRSS2
							TMPRSS4
							TMPRSS6
							TMSB10
							TNFAIP2
							TNFRSF11A
							TNFRSF25
							TNK2
							TNNI3
							TOB1
							TOB2
							TOP1MT
							TOR4A
							TOX3
							TP53TG1
							TPCN1
							TPD52L1
							TPRN
							TPT1-AS1
							TRADD
							TRAM1L1
							TRAPPC6A
							TRAPPC9
							TRIB2
							TRIB3
							TRIM52-AS1
							TRPM4
							TRPT1
							TRPV2
							TSPAN13
							TSPAN2
							TSPAN3
							TSPAN8
							TSPAN9
							TSPO
							TSSK3
							TSTD1
							TTC39A
							TTC9
							TTLL1
							TTLL13P
							TTLL3
							TTYH3
							TUBE1
							TWF2
							TXNIP
							TXNRD3
							TXNRD3NB
							TYSND1
							TYW5
							UBE2CP5
							UBE2E2
							UBE2H
							UBE2W
							UBTD1
							UBXN10-AS1
							UFM1
							UGDH-AS1
							UNC5CL
							UNC93B1
							UNK
							UPK3BL
							UPP1
							UQCC2
							UQCRFS1
							URB1-AS1
							USP40
							USPL1
							UST
							VAMP2
							VAMP5
							VAT1
							VEGFC
							VIPR1
							VPS37C
							VPS37D
							WBP1
							WHAMM
							WHRN
							WNT7B
							WRB
							WRB-SH3BGR
							WSB2
							WWOX
							WWP2
							XAB2
							XBP1
							XIAP
							XPNPEP3
							YARS
							YIF1A
							YPEL1
							ZASP
							ZBED5-AS1
							ZBTB3
							ZC3H6
							ZFAS1
							ZFP36
							ZFP36L2
							ZFPL1
							ZFYVE19
							ZHX2
							ZMIZ1-AS1
							ZNF117
							ZNF226
							ZNF251
							ZNF287
							ZNF321P
							ZNF350-AS1
							ZNF428
							ZNF436
							ZNF436-AS1
							ZNF467
							ZNF516
							ZNF524
							ZNF587
							ZNF652
							ZNF664
							ZNF732
							ZNF750
							ZNF77
							ZNF785
							ZNF805
							ZNF83
							ZNF862

## Sheet: H358_FXR1_KD_D3_all
KEGG pathway analysis.
Gene Set Name	Description	# Genes in Overlap (k)	# Genes (K)	k/K	p-value	FDR q-value	Genes
KEGG_RIBOSOME	Ribosome	23	88	0.2614	2.45e-22	4.55e-20	RPL35,RPL22L1,RPL13A,RPL10A,RPS27L,RPL9,RPL13,RPL18,RPL18A,RPL28,RPL32,RPL34,RPLP1,RPLP2,RPS3,RPS5,RPS9,RPS10,RPS12,RPS15,RPS19,RPS21,RPS29
KEGG_FOCAL_ADHESION	Focal adhesion	16	201	0.0796	7.34e-08	6.82e-06	PRKCA,MYL9,IGF1,ITGA6,ITGAV,LAMA2,VEGFC,LAMC3,ITGB7,CCND3,PIP5K1C,DOCK1,COL1A1,VTN,ARHGAP5,PARVB
KEGG_MAPK_SIGNALING_PATHWAY	MAPK signaling pathway	18	267	0.0674	1.43e-07	8.88e-06	PRKCA,CACNA1D,PLA2G2A,TGFBR1,FGF1,PPP3CB,CACNB1,NFATC2,HSPA2,MAP2K4,MAPKAPK2,HSPB1,NTRK2,DUSP14,DUSP2,DUSP8,TAOK1,RELB
KEGG_VASCULAR_SMOOTH_MUSCLE_CONTRACTION	Vascular smooth muscle contraction	11	115	0.0957	1.32e-06	6.15e-05	PRKCA,MYL9,CACNA1D,PLA2G2A,ADCY9,PLCB4,GNAQ,CALM2,GUCY1A2,RAMP1,PPP1R12B
KEGG_LYSOSOME	Lysosome	11	121	0.0909	2.19e-06	7.43e-05	ABCB9,PLA2G15,ENTPD4,SMPD1,LIPA,ACP5,CTSE,LAMP3,NAGPA,LAPTM5,NAPSA
KEGG_PATHWAYS_IN_CANCER	Pathways in cancer	18	328	0.0549	2.81e-06	7.43e-05	PRKCA,IGF1,ITGA6,ITGAV,LAMA2,VEGFC,LAMC3,TGFBR1,FGF1,KITLG,DVL3,FZD3,FLT3LG,AXIN2,RXRA,RALBP1,DAPK2,EGLN1
KEGG_CALCIUM_SIGNALING_PATHWAY	Calcium signaling pathway	13	178	0.073	3.18e-06	7.43e-05	PRKCA,CACNA1D,PPP3CB,ADCY9,PLCB4,GNAQ,CALM2,ADRB1,F2R,BDKRB2,CD38,BST1,ATP2B1
KEGG_MELANOGENESIS	Melanogenesis	10	102	0.098	3.19e-06	7.43e-05	PRKCA,ADCY9,PLCB4,GNAQ,CALM2,KITLG,DVL3,FZD3,GNAO1,CREB3L2
KEGG_DILATED_CARDIOMYOPATHY	Dilated cardiomyopathy	9	92	0.0978	1.01e-05	0.000208	IGF1,ITGA6,ITGAV,LAMA2,ITGB7,CACNA1D,CACNB1,ADCY9,ADRB1
KEGG_CYTOKINE_CYTOKINE_RECEPTOR_INTERACTION	Cytokine-cytokine receptor interaction	15	267	0.0562	1.41e-05	0.000263	VEGFC,TGFBR1,KITLG,FLT3LG,IL7R,CSF1,AMH,INHBB,CCR10,CXCR6,CCR1,IL20RA,IL22RA1,IL18,TNFRSF6B
KEGG_GAP_JUNCTION	Gap junction	8	90	0.0889	6.26e-05	0.00106	PRKCA,ADCY9,PLCB4,GNAQ,GUCY1A2,ADRB1,LPAR1,TUBB3
KEGG_LONG_TERM_DEPRESSION	Long-term depression	7	70	0.1	8.5e-05	0.00132	PRKCA,IGF1,PLA2G2A,PLCB4,GNAQ,GUCY1A2,GNAO1
KEGG_WNT_SIGNALING_PATHWAY	Wnt signaling pathway	10	151	0.0662	9.79e-05	0.00138	PRKCA,CCND3,PPP3CB,NFATC2,PLCB4,DVL3,FZD3,AXIN2,LRP6,MMP7
KEGG_ENDOCYTOSIS	Endocytosis	11	183	0.0601	0.000106	0.00138	PIP5K1C,HSPA2,ADRB1,F2R,HLA-B,NEDD4,GRK6,AGAP2,PSD4,SH3GL1,DNAJC6
KEGG_REGULATION_OF_ACTIN_CYTOSKELETON	Regulation of actin cytoskeleton	12	216	0.0556	0.000111	0.00138	MYL9,ITGA6,ITGAV,ITGB7,PIP5K1C,DOCK1,FGF1,F2R,BDKRB2,CSK,WASF1,SSH3
KEGG_GNRH_SIGNALING_PATHWAY	GnRH signaling pathway	8	101	0.0792	0.000141	0.00164	PRKCA,CACNA1D,PLA2G2A,MAP2K4,ADCY9,PLCB4,GNAQ,CALM2
KEGG_ECM_RECEPTOR_INTERACTION	ECM-receptor interaction	7	84	0.0833	0.000268	0.00294	ITGA6,ITGAV,LAMA2,LAMC3,ITGB7,COL1A1,VTN
KEGG_HYPERTROPHIC_CARDIOMYOPATHY_HCM	Hypertrophic cardiomyopathy (HCM)	7	85	0.0824	0.000289	0.00298	IGF1,ITGA6,ITGAV,LAMA2,ITGB7,CACNA1D,CACNB1
KEGG_PPAR_SIGNALING_PATHWAY	PPAR signaling pathway	6	69	0.087	0.000585	0.00572	RXRA,ACOX2,SLC27A5,SORBS1,FABP5,FABP6
KEGG_CELL_ADHESION_MOLECULES_CAMS	Cell adhesion molecules (CAMs)	8	134	0.0597	0.000951	0.00826	ITGA6,ITGAV,ITGB7,HLA-B,ICAM2,NEO1,PDCD1LG2,CNTNAP1
KEGG_ARRHYTHMOGENIC_RIGHT_VENTRICULAR_CARDIOMYOPATHY_ARVC	Arrhythmogenic right ventricular cardiomyopathy (ARVC)	6	76	0.0789	0.000977	0.00826	ITGA6,ITGAV,LAMA2,ITGB7,CACNA1D,CACNB1
KEGG_VEGF_SIGNALING_PATHWAY	VEGF signaling pathway	6	76	0.0789	0.000977	0.00826	PRKCA,PLA2G2A,PPP3CB,NFATC2,MAPKAPK2,HSPB1
KEGG_ALZHEIMERS_DISEASE	Alzheimer's disease	9	169	0.0533	0.00105	0.00852	CACNA1D,PPP3CB,PLCB4,GNAQ,CALM2,UQCRFS1,HSD17B10,ATP5G2,IDE
KEGG_HEMATOPOIETIC_CELL_LINEAGE	Hematopoietic cell lineage	6	88	0.0682	0.00208	0.0161	ITGA6,KITLG,FLT3LG,CD38,IL7R,CSF1
KEGG_NEUROACTIVE_LIGAND_RECEPTOR_INTERACTION	Neuroactive ligand-receptor interaction	11	272	0.0404	0.00283	0.021	ADRB1,F2R,BDKRB2,LPAR1,CHRNA1,ADORA1,FPR1,NPBWR1,P2RY11,TSPO,F2RL3
KEGG_LONG_TERM_POTENTIATION	Long-term potentiation	5	70	0.0714	0.00398	0.0277	PRKCA,PPP3CB,PLCB4,GNAQ,CALM2
KEGG_ABC_TRANSPORTERS	ABC transporters	4	44	0.0909	0.00416	0.0277	ABCB9,ABCD3,ABCB10,ABCA12
KEGG_LYSINE_DEGRADATION	Lysine degradation	4	44	0.0909	0.00416	0.0277	PIPOX,ASH1L,OGDH,EHMT1
KEGG_NATURAL_KILLER_CELL_MEDIATED_CYTOTOXICITY	Natural killer cell mediated cytotoxicity	7	137	0.0511	0.00465	0.0298	PRKCA,PPP3CB,NFATC2,HLA-B,ICAM2,SYK,RAET1E
KEGG_GLYCEROPHOSPHOLIPID_METABOLISM	Glycerophospholipid metabolism	5	77	0.0649	0.00597	0.037	PLA2G2A,PLA2G15,MBOAT1,GPAM,LYPLA2
KEGG_FC_EPSILON_RI_SIGNALING_PATHWAY	Fc epsilon RI signaling pathway	5	79	0.0633	0.00664	0.0388	PRKCA,PLA2G2A,MAP2K4,SYK,GAB2
KEGG_GLYCOSAMINOGLYCAN_BIOSYNTHESIS_HEPARAN_SULFATE	Glycosaminoglycan biosynthesis - heparan sulfate	3	26	0.1154	0.00667	0.0388	HS6ST1,HS2ST1,HS3ST1
KEGG_SMALL_CELL_LUNG_CANCER	Small cell lung cancer	5	84	0.0595	0.00857	0.0483	ITGA6,ITGAV,LAMA2,LAMC3,RXRA
KEGG_TGF_BETA_SIGNALING_PATHWAY	TGF-beta signaling pathway	5	86	0.0581	0.00944	0.0516	TGFBR1,AMH,INHBB,E2F5,PITX2
KEGG_RNA_DEGRADATION	RNA degradation	4	59	0.0678	0.0117	0.0611	CNOT2,PARN,EXOSC5,CNOT6
KEGG_NEUROTROPHIN_SIGNALING_PATHWAY	Neurotrophin signaling pathway	6	126	0.0476	0.0118	0.0611	MAPKAPK2,NTRK2,CALM2,CSK,IRS1,ARHGDIB
KEGG_AXON_GUIDANCE	Axon guidance	6	129	0.0465	0.0132	0.0661	PPP3CB,NFATC2,PLXNC1,SEMA3A,PLXNA3,SEMA7A
KEGG_FC_GAMMA_R_MEDIATED_PHAGOCYTOSIS	Fc gamma R-mediated phagocytosis	5	97	0.0515	0.0153	0.0749	PRKCA,PIP5K1C,WASF1,SYK,GAB2
KEGG_PYRIMIDINE_METABOLISM	Pyrimidine metabolism	5	98	0.051	0.0159	0.076	ENTPD4,POLE4,CDA,CMPK2,DTYMK
KEGG_UBIQUITIN_MEDIATED_PROTEOLYSIS	Ubiquitin mediated proteolysis	6	138	0.0435	0.0178	0.0827	NEDD4,SOCS1,WWP2,MID1,TRIM37,UBE2W
KEGG_GLYCOSPHINGOLIPID_BIOSYNTHESIS_GANGLIO_SERIES	Glycosphingolipid biosynthesis - ganglio series	2	15	0.1333	0.0205	0.0932	ST6GALNAC3,ST6GALNAC6
KEGG_PRIMARY_BILE_ACID_BIOSYNTHESIS	Primary bile acid biosynthesis	2	16	0.125	0.0232	0.103	ACOX2,SLC27A5
KEGG_CHEMOKINE_SIGNALING_PATHWAY	Chemokine signaling pathway	7	190	0.0368	0.0246	0.104	ADCY9,PLCB4,CCR10,CXCR6,CCR1,GRK6,CSK
KEGG_ALDOSTERONE_REGULATED_SODIUM_REABSORPTION	Aldosterone-regulated sodium reabsorption	3	42	0.0714	0.0247	0.104	PRKCA,IGF1,IRS1
KEGG_ADHERENS_JUNCTION	Adherens junction	4	75	0.0533	0.026	0.108	TGFBR1,WASF1,SORBS1,FARP2
KEGG_PHOSPHATIDYLINOSITOL_SIGNALING_SYSTEM	Phosphatidylinositol signaling system	4	76	0.0526	0.0271	0.11	PRKCA,PIP5K1C,PLCB4,CALM2
KEGG_VASOPRESSIN_REGULATED_WATER_REABSORPTION	Vasopressin-regulated water reabsorption	3	44	0.0682	0.0279	0.11	ADCY9,CREB3L2,ARHGDIB
KEGG_OOCYTE_MEIOSIS	Oocyte meiosis	5	114	0.0439	0.0284	0.11	IGF1,PPP3CB,ADCY9,CALM2,FBXO5
KEGG_JAK_STAT_SIGNALING_PATHWAY	Jak-STAT signaling pathway	6	155	0.0387	0.0294	0.11	CCND3,IL7R,IL20RA,IL22RA1,SOCS1,SPRED1
KEGG_PEROXISOME	Peroxisome	4	78	0.0513	0.0295	0.11	ACOX2,ABCD3,PIPOX,FAR1
KEGG_TYPE_II_DIABETES_MELLITUS	Type II diabetes mellitus	3	47	0.0638	0.0331	0.121	CACNA1D,IRS1,SOCS1
KEGG_GLYCEROLIPID_METABOLISM	Glycerolipid metabolism	3	49	0.0612	0.0368	0.131	MBOAT1,GPAM,MGLL
KEGG_AMYOTROPHIC_LATERAL_SCLEROSIS_ALS	Amyotrophic lateral sclerosis (ALS)	3	53	0.0566	0.0448	0.157	PPP3CB,CASP1,DERL1
KEGG_INOSITOL_PHOSPHATE_METABOLISM	Inositol phosphate metabolism	3	54	0.0556	0.0469	0.162	PIP5K1C,PLCB4,IPMK
KEGG_BASAL_CELL_CARCINOMA	Basal cell carcinoma	3	55	0.0545	0.0491	0.162	DVL3,FZD3,AXIN2
KEGG_NICOTINATE_AND_NICOTINAMIDE_METABOLISM	Nicotinate and nicotinamide metabolism	2	24	0.0833	0.0495	0.162	CD38,BST1
KEGG_TIGHT_JUNCTION	Tight junction	5	134	0.0373	0.0511	0.162	PRKCA,MYL9,ASH1L,MAGI3,CASK
KEGG_CYTOSOLIC_DNA_SENSING_PATHWAY	Cytosolic DNA-sensing pathway	3	56	0.0536	0.0513	0.162	IL18,CASP1,MAVS
KEGG_VIBRIO_CHOLERAE_INFECTION	Vibrio cholerae infection	3	56	0.0536	0.0513	0.162	PRKCA,ADCY9,SLC12A2
KEGG_DORSO_VENTRAL_AXIS_FORMATION	Dorso-ventral axis formation	2	25	0.08	0.0532	0.165	PIWIL4,ETV7
KEGG_INSULIN_SIGNALING_PATHWAY	Insulin signaling pathway	5	137	0.0365	0.0551	0.168	CALM2,SORBS1,IRS1,SOCS1,ACACA
KEGG_PATHOGENIC_ESCHERICHIA_COLI_INFECTION	Pathogenic Escherichia coli infection	3	59	0.0508	0.0582	0.175	PRKCA,TUBB3,TLR4
KEGG_HISTIDINE_METABOLISM	Histidine metabolism	2	29	0.069	0.0693	0.205	ACY3,ALDH1A3
KEGG_GLIOMA	Glioma	3	65	0.0462	0.0734	0.213	PRKCA,IGF1,CALM2
KEGG_ADIPOCYTOKINE_SIGNALING_PATHWAY	Adipocytokine signaling pathway	3	67	0.0448	0.0788	0.225	RXRA,IRS1,CAMKK1
KEGG_ALANINE_ASPARTATE_AND_GLUTAMATE_METABOLISM	Alanine, aspartate and glutamate metabolism	2	32	0.0625	0.0823	0.227	ACY3,GFPT1
KEGG_CITRATE_CYCLE_TCA_CYCLE	Citrate cycle (TCA cycle)	2	32	0.0625	0.0823	0.227	OGDH,SUCLA2
KEGG_COMPLEMENT_AND_COAGULATION_CASCADES	Complement and coagulation cascades	3	69	0.0435	0.0844	0.227	F2R,BDKRB2,MASP2
KEGG_P53_SIGNALING_PATHWAY	p53 signaling pathway	3	69	0.0435	0.0844	0.227	IGF1,CCND3,CCNB3
KEGG_PROPANOATE_METABOLISM	Propanoate metabolism	2	33	0.0606	0.0867	0.228	ACACA,SUCLA2
KEGG_PANCREATIC_CANCER	Pancreatic cancer	3	70	0.0429	0.0872	0.228	VEGFC,TGFBR1,RALBP1
KEGG_PURINE_METABOLISM	Purine metabolism	5	159	0.0314	0.0907	0.234	ADCY9,GUCY1A2,ENTPD4,POLE4,PDE8A
KEGG_VIRAL_MYOCARDITIS	Viral myocarditis	3	73	0.0411	0.096	0.245	LAMA2,HLA-B,EIF4G3
KEGG_DNA_REPLICATION	DNA replication	2	36	0.0556	0.101	0.25	POLE4,RNASEH2B
KEGG_LEUKOCYTE_TRANSENDOTHELIAL_MIGRATION	Leukocyte transendothelial migration	4	118	0.0339	0.101	0.25	PRKCA,MYL9,ARHGAP5,NCF2
KEGG_B_CELL_RECEPTOR_SIGNALING_PATHWAY	B cell receptor signaling pathway	3	75	0.04	0.102	0.25	PPP3CB,NFATC2,SYK
KEGG_CARDIAC_MUSCLE_CONTRACTION	Cardiac muscle contraction	3	80	0.0375	0.118	0.285	CACNA1D,CACNB1,UQCRFS1
KEGG_SPHINGOLIPID_METABOLISM	Sphingolipid metabolism	2	40	0.05	0.12	0.286	SMPD1,SGPP1
KEGG_BLADDER_CANCER	Bladder cancer	2	42	0.0476	0.13	0.306	VEGFC,DAPK2
KEGG_PROGESTERONE_MEDIATED_OOCYTE_MATURATION	Progesterone-mediated oocyte maturation	3	86	0.0349	0.138	0.32	IGF1,ADCY9,CCNB3
KEGG_VALINE_LEUCINE_AND_ISOLEUCINE_DEGRADATION	Valine, leucine and isoleucine degradation	2	44	0.0455	0.14	0.321	HSD17B10,AUH
KEGG_HUNTINGTONS_DISEASE	Huntington's disease	5	185	0.027	0.145	0.328	PLCB4,GNAQ,CREB3L2,UQCRFS1,ATP5G2
KEGG_ANTIGEN_PROCESSING_AND_PRESENTATION	Antigen processing and presentation	3	89	0.0337	0.148	0.332	HSPA2,HLA-B,CANX
KEGG_N_GLYCAN_BIOSYNTHESIS	N-Glycan biosynthesis	2	46	0.0435	0.15	0.333	DPM2,MAN2A2
KEGG_NOTCH_SIGNALING_PATHWAY	Notch signaling pathway	2	47	0.0426	0.156	0.34	DVL3,LFNG
KEGG_INTESTINAL_IMMUNE_NETWORK_FOR_IGA_PRODUCTION	Intestinal immune network for IgA production	2	48	0.0417	0.161	0.348	ITGB7,CCR10
KEGG_MTOR_SIGNALING_PATHWAY	mTOR signaling pathway	2	52	0.0385	0.182	0.389	IGF1,VEGFC
KEGG_ARGININE_AND_PROLINE_METABOLISM	Arginine and proline metabolism	2	54	0.037	0.193	0.403	CKB,AGMAT
KEGG_NON_SMALL_CELL_LUNG_CANCER	Non-small cell lung cancer	2	54	0.037	0.193	0.403	PRKCA,RXRA
KEGG_ARACHIDONIC_ACID_METABOLISM	Arachidonic acid metabolism	2	58	0.0345	0.215	0.444	PLA2G2A,LTC4S
KEGG_COLORECTAL_CANCER	Colorectal cancer	2	62	0.0323	0.237	0.478	TGFBR1,AXIN2
KEGG_NOD_LIKE_RECEPTOR_SIGNALING_PATHWAY	NOD-like receptor signaling pathway	2	62	0.0323	0.237	0.478	IL18,CASP1
KEGG_EPITHELIAL_CELL_SIGNALING_IN_HELICOBACTER_PYLORI_INFECTION	Epithelial cell signaling in Helicobacter pylori infection	2	68	0.0294	0.27	0.54	MAP2K4,CSK
KEGG_METABOLISM_OF_XENOBIOTICS_BY_CYTOCHROME_P450	Metabolism of xenobiotics by cytochrome P450	2	70	0.0286	0.281	0.55	ALDH1A3,GSTM4
KEGG_RENAL_CELL_CARCINOMA	Renal cell carcinoma	2	70	0.0286	0.281	0.55	VEGFC,EGLN1
KEGG_MELANOMA	Melanoma	2	71	0.0282	0.286	0.554	IGF1,FGF1
KEGG_DRUG_METABOLISM_CYTOCHROME_P450	Drug metabolism - cytochrome P450	2	72	0.0278	0.292	0.554	ALDH1A3,GSTM4
KEGG_LEISHMANIA_INFECTION	Leishmania infection	2	72	0.0278	0.292	0.554	TLR4,NCF2
KEGG_CHRONIC_MYELOID_LEUKEMIA	Chronic myeloid leukemia	2	73	0.0274	0.297	0.556	TGFBR1,GAB2
KEGG_CELL_CYCLE	Cell cycle	3	128	0.0234	0.299	0.556	CCND3,E2F5,CCNB3

## Sheet: H358_FXR1_KD_D3_uniq
Gene Set Name	Description	# Genes in Overlap (k)	# Genes (K)	k/K	p-value	FDR q-value	Genes	Genes
KEGG_RIBOSOME	Ribosome	22	88	0.25	6.95e-26	1.29e-23	RPL35,RPL13A,RPL10A,RPS27L,RPL9,RPL13,RPL18,RPL18A,RPL28,RPL32,RPL34,RPLP1,RPLP2,RPS3,RPS5,RPS9,RPS10,RPS12,RPS15,RPS19,RPS21,RPS29
KEGG_CALCIUM_SIGNALING_PATHWAY	Calcium signaling pathway	8	178	0.0449	0.000204	0.0189	CACNA1D,PLCB4,CALM2,ADRB1,F2R,CD38,BDKRB2,BST1
KEGG_VASCULAR_SMOOTH_MUSCLE_CONTRACTION	Vascular smooth muscle contraction	6	115	0.0522	0.000581	0.036	CACNA1D,PLCB4,CALM2,PLA2G2A,GUCY1A2,RAMP1
KEGG_DILATED_CARDIOMYOPATHY	Dilated cardiomyopathy	5	92	0.0543	0.00139	0.0647	CACNA1D,ADRB1,ITGAV,LAMA2,CACNB1
KEGG_MELANOGENESIS	Melanogenesis	5	102	0.049	0.00219	0.0687	PLCB4,CALM2,KITLG,DVL3,FZD3
KEGG_FOCAL_ADHESION	Focal adhesion	7	201	0.0348	0.00222	0.0687	ITGAV,LAMA2,PIP5K1C,COL1A1,VTN,DOCK1,ARHGAP5
KEGG_MAPK_SIGNALING_PATHWAY	MAPK signaling pathway	8	267	0.03	0.0028	0.0744	CACNA1D,PLA2G2A,CACNB1,NFATC2,HSPB1,DUSP14,TAOK1,RELB
KEGG_LYSOSOME	Lysosome	5	121	0.0413	0.00457	0.0918	PLA2G15,SMPD1,ACP5,CTSE,LAPTM5
KEGG_ARRHYTHMOGENIC_RIGHT_VENTRICULAR_CARDIOMYOPATHY_ARVC	Arrhythmogenic right ventricular cardiomyopathy(ARVC)	4	76	0.0526	0.00471	0.0918	CACNA1D,ITGAV,LAMA2,CACNB1
KEGG_GLYCEROPHOSPHOLIPID_METABOLISM	Glycerophospholipid metabolism	4	77	0.0519	0.00493	0.0918	PLA2G2A,PLA2G15,GPAM,LYPLA2
KEGG_ENDOCYTOSIS	Endocytosis	6	183	0.0328	0.00602	0.0928	ADRB1,F2R,PIP5K1C,HLA-B,PSD4,DNAJC6
KEGG_ECM_RECEPTOR_INTERACTION	ECM-receptor interaction	4	84	0.0476	0.0067	0.0928	ITGAV,LAMA2,COL1A1,VTN
KEGG_LYSINE_DEGRADATION	Lysine degradation	3	44	0.0682	0.00698	0.0928	ASH1L,OGDH,EHMT1
KEGG_HYPERTROPHIC_CARDIOMYOPATHY_HCM	Hypertrophic cardiomyopathy (HCM)	4	85	0.0471	0.00699	0.0928	CACNA1D,ITGAV,LAMA2,CACNB1
KEGG_HEMATOPOIETIC_CELL_LINEAGE	Hematopoietic cell lineage	4	88	0.0455	0.00788	0.0932	CD38,KITLG,FLT3LG,IL7R
KEGG_TYPE_II_DIABETES_MELLITUS	Type II diabetes mellitus	3	47	0.0638	0.00838	0.0932	CACNA1D,SOCS1,IRS1
KEGG_GAP_JUNCTION	Gap junction	4	90	0.0444	0.00852	0.0932	PLCB4,ADRB1,GUCY1A2,TUBB3
KEGG_CYTOKINE_CYTOKINE_RECEPTOR_INTERACTION	Cytokine-cytokine receptor interaction	7	267	0.0262	0.0102	0.105	KITLG,FLT3LG,IL7R,IL18,IL20RA,CCR10,TNFRSF6B
KEGG_WNT_SIGNALING_PATHWAY	Wnt signaling pathway	5	151	0.0331	0.0114	0.105	PLCB4,DVL3,FZD3,NFATC2,LRP6
KEGG_PYRIMIDINE_METABOLISM	Pyrimidine metabolism	4	98	0.0408	0.0114	0.105	POLE4,CDA,CMPK2,DTYMK
KEGG_INOSITOL_PHOSPHATE_METABOLISM	Inositol phosphate metabolism	3	54	0.0556	0.0123	0.105	PLCB4,PIP5K1C,IPMK
KEGG_GNRH_SIGNALING_PATHWAY	GnRH signaling pathway	4	101	0.0396	0.0126	0.105	CACNA1D,PLCB4,CALM2,PLA2G2A
KEGG_REGULATION_OF_ACTIN_CYTOSKELETON	Regulation of actin cytoskeleton	6	216	0.0278	0.013	0.105	F2R,BDKRB2,ITGAV,PIP5K1C,DOCK1,WASF1
KEGG_CYTOSOLIC_DNA_SENSING_PATHWAY	Cytosolic DNA-sensing pathway	3	56	0.0536	0.0135	0.105	IL18,CASP1,MAVS
KEGG_RNA_DEGRADATION	RNA degradation	3	59	0.0508	0.0155	0.116	CNOT2,PARN,EXOSC5
KEGG_ALZHEIMERS_DISEASE	Alzheimer's disease	5	169	0.0296	0.0177	0.127	CACNA1D,PLCB4,CALM2,ATP5G2,IDE
KEGG_NICOTINATE_AND_NICOTINAMIDE_METABOLISM	Nicotinate and nicotinamide metabolism	2	24	0.0833	0.019	0.131	CD38,BST1
KEGG_DORSO_VENTRAL_AXIS_FORMATION	Dorso-ventral axis formation	2	25	0.08	0.0205	0.136	PIWIL4,ETV7
KEGG_LONG_TERM_DEPRESSION	Long-term depression	3	70	0.0429	0.0244	0.156	PLCB4,PLA2G2A,GUCY1A2
KEGG_PATHWAYS_IN_CANCER	Pathways in cancer	7	328	0.0213	0.0278	0.172	ITGAV,LAMA2,KITLG,DVL3,FZD3,FLT3LG,EGLN1
KEGG_PHOSPHATIDYLINOSITOL_SIGNALING_SYSTEM	Phosphatidylinositol signaling system	3	76	0.0395	0.0301	0.175	PLCB4,CALM2,PIP5K1C
KEGG_VEGF_SIGNALING_PATHWAY	VEGF signaling pathway	3	76	0.0395	0.0301	0.175	PLA2G2A,NFATC2,HSPB1
KEGG_CELL_ADHESION_MOLECULES_CAMS	Cell adhesion molecules (CAMs)	4	134	0.0299	0.0317	0.179	ITGAV,HLA-B,ICAM2,NEO1
KEGG_SPHINGOLIPID_METABOLISM	Sphingolipid metabolism	2	40	0.05	0.0489	0.264	SMPD1,SGPP1
KEGG_JAK_STAT_SIGNALING_PATHWAY	Jak-STAT signaling pathway	4	155	0.0258	0.0496	0.264	IL7R,SOCS1,IL20RA,SPRED1
KEGG_ABC_TRANSPORTERS	ABC transporters	2	44	0.0455	0.058	0.3	ABCD3,ABCB10
KEGG_N_GLYCAN_BIOSYNTHESIS	N-Glycan biosynthesis	2	46	0.0435	0.0627	0.315	DPM2,MAN2A2
KEGG_BASAL_CELL_CARCINOMA	Basal cell carcinoma	2	55	0.0364	0.0855	0.419	DVL3,FZD3
KEGG_PATHOGENIC_ESCHERICHIA_COLI_INFECTION	Pathogenic Escherichia coli infection	2	59	0.0339	0.0963	0.46	TUBB3,TLR4
KEGG_NEUROTROPHIN_SIGNALING_PATHWAY	Neurotrophin signaling pathway	3	126	0.0238	0.102	0.473	CALM2,IRS1,ARHGDIB
KEGG_NOD_LIKE_RECEPTOR_SIGNALING_PATHWAY	NOD-like receptor signaling pathway	2	62	0.0323	0.105	0.475	IL18,CASP1
KEGG_TIGHT_JUNCTION	Tight junction	3	134	0.0224	0.117	0.494	ASH1L,MAGI3,CASK
KEGG_ADIPOCYTOKINE_SIGNALING_PATHWAY	Adipocytokine signaling pathway	2	67	0.0299	0.119	0.494	IRS1,CAMKK1
KEGG_INSULIN_SIGNALING_PATHWAY	Insulin signaling pathway	3	137	0.0219	0.122	0.494	CALM2,SOCS1,IRS1
KEGG_NATURAL_KILLER_CELL_MEDIATED_CYTOTOXICITY	Natural killer cell mediated cytotoxicity	3	137	0.0219	0.122	0.494	NFATC2,HLA-B,ICAM2
KEGG_UBIQUITIN_MEDIATED_PROTEOLYSIS	Ubiquitin mediated proteolysis	3	138	0.0217	0.124	0.494	SOCS1,MID1,TRIM37
KEGG_COMPLEMENT_AND_COAGULATION_CASCADES	Complement and coagulation cascades	2	69	0.029	0.125	0.494	F2R,BDKRB2
KEGG_LONG_TERM_POTENTIATION	Long-term potentiation	2	70	0.0286	0.128	0.495	PLCB4,CALM2
KEGG_VIRAL_MYOCARDITIS	Viral myocarditis	2	73	0.0274	0.137	0.519	LAMA2,HLA-B
KEGG_PEROXISOME	Peroxisome	2	78	0.0256	0.152	0.566	ABCD3,FAR1
KEGG_CARDIAC_MUSCLE_CONTRACTION	Cardiac muscle contraction	2	80	0.025	0.158	0.577	CACNA1D,CACNB1
KEGG_PURINE_METABOLISM	Purine metabolism	3	159	0.0189	0.168	0.599	GUCY1A2,POLE4,PDE8A
KEGG_SMALL_CELL_LUNG_CANCER	Small cell lung cancer	2	84	0.0238	0.171	0.599	ITGAV,LAMA2
KEGG_FC_GAMMA_R_MEDIATED_PHAGOCYTOSIS	Fc gamma R-mediated phagocytosis	2	97	0.0206	0.212	0.731	PIP5K1C,WASF1
KEGG_NEUROACTIVE_LIGAND_RECEPTOR_INTERACTION	Neuroactive ligand-receptor interaction	4	272	0.0147	0.222	0.751	ADRB1,F2R,BDKRB2,P2RY11
KEGG_OOCYTE_MEIOSIS	Oocyte meiosis	2	114	0.0175	0.268	0.889	CALM2,FBXO5

## Sheet: H358_FXR1_KD_D3&5
Gene Set Name	Description	# Genes in Overlap (k)	# Genes (K)	k/K	p-value	FDR q-value	Genes
KEGG_FOCAL_ADHESION	Focal adhesion	9	201	0.0448	4.39e-06	0.000391	PRKCA,VEGFC,IGF1,ITGA6,LAMC3,MYL9,ITGB7,CCND3,PARVB
KEGG_PATHWAYS_IN_CANCER	Pathways in cancer	11	328	0.0335	6.22e-06	0.000391	PRKCA,VEGFC,IGF1,ITGA6,LAMC3,TGFBR1,FGF1,RXRA,AXIN2,RALBP1,DAPK2
KEGG_MAPK_SIGNALING_PATHWAY	MAPK signaling pathway	10	267	0.0375	6.31e-06	0.000391	PRKCA,TGFBR1,FGF1,MAP2K4,PPP3CB,HSPA2,MAPKAPK2,NTRK2,DUSP2,DUSP8
KEGG_PPAR_SIGNALING_PATHWAY	PPAR signaling pathway	5	69	0.0725	6.51e-05	0.00303	RXRA,SORBS1,ACOX2,FABP5,FABP6
KEGG_LYSOSOME	Lysosome	6	121	0.0496	0.000102	0.00378	ABCB9,ENTPD4,LIPA,LAMP3,NAGPA,NAPSA
KEGG_CYTOKINE_CYTOKINE_RECEPTOR_INTERACTION	Cytokine-cytokine receptor interaction	8	267	0.03	0.000249	0.00771	VEGFC,TGFBR1,AMH,INHBB,CXCR6,CCR1,CSF1,IL22RA1
KEGG_MELANOGENESIS	Melanogenesis	5	102	0.049	0.00041	0.0109	PRKCA,GNAQ,ADCY9,GNAO1,CREB3L2
KEGG_VASCULAR_SMOOTH_MUSCLE_CONTRACTION	Vascular smooth muscle contraction	5	115	0.0435	0.000709	0.0165	PRKCA,MYL9,GNAQ,ADCY9,PPP1R12B
KEGG_LONG_TERM_DEPRESSION	Long-term depression	4	70	0.0571	0.00089	0.0184	PRKCA,IGF1,GNAQ,GNAO1
KEGG_FC_EPSILON_RI_SIGNALING_PATHWAY	Fc epsilon RI signaling pathway	4	79	0.0506	0.0014	0.0247	PRKCA,MAP2K4,SYK,GAB2
KEGG_NEUROACTIVE_LIGAND_RECEPTOR_INTERACTION	Neuroactive ligand-receptor interaction	7	272	0.0257	0.00146	0.0247	LPAR1,CHRNA1,ADORA1,FPR1,NPBWR1,TSPO,F2RL3
KEGG_TGF_BETA_SIGNALING_PATHWAY	TGF-beta signaling pathway	4	86	0.0465	0.00191	0.0284	TGFBR1,AMH,INHBB,E2F5
KEGG_REGULATION_OF_ACTIN_CYTOSKELETON	Regulation of actin cytoskeleton	6	216	0.0278	0.00216	0.0284	ITGA6,MYL9,ITGB7,FGF1,CSK,SSH3
KEGG_GAP_JUNCTION	Gap junction	4	90	0.0444	0.00226	0.0284	PRKCA,GNAQ,ADCY9,LPAR1
KEGG_WNT_SIGNALING_PATHWAY	Wnt signaling pathway	5	151	0.0331	0.00237	0.0284	PRKCA,CCND3,AXIN2,PPP3CB,MMP7
KEGG_DILATED_CARDIOMYOPATHY	Dilated cardiomyopathy	4	92	0.0435	0.00244	0.0284	IGF1,ITGA6,ITGB7,ADCY9
KEGG_GNRH_SIGNALING_PATHWAY	GnRH signaling pathway	4	101	0.0396	0.00342	0.0374	PRKCA,MAP2K4,GNAQ,ADCY9
KEGG_CALCIUM_SIGNALING_PATHWAY	Calcium signaling pathway	5	178	0.0281	0.00478	0.0494	PRKCA,PPP3CB,GNAQ,ADCY9,ATP2B1
KEGG_ENDOCYTOSIS	Endocytosis	5	183	0.0273	0.00536	0.0525	HSPA2,GRK6,NEDD4,AGAP2,SH3GL1
KEGG_CHEMOKINE_SIGNALING_PATHWAY	Chemokine signaling pathway	5	190	0.0263	0.00627	0.0583	CXCR6,CCR1,ADCY9,CSK,GRK6
KEGG_AXON_GUIDANCE	Axon guidance	4	129	0.031	0.00809	0.0686	PPP3CB,PLXNC1,PLXNA3,SEMA7A
KEGG_P53_SIGNALING_PATHWAY	p53 signaling pathway	3	69	0.0435	0.00863	0.0686	IGF1,CCND3,CCNB3
KEGG_LONG_TERM_POTENTIATION	Long-term potentiation	3	70	0.0429	0.00898	0.0686	PRKCA,PPP3CB,GNAQ
KEGG_PANCREATIC_CANCER	Pancreatic cancer	3	70	0.0429	0.00898	0.0686	VEGFC,TGFBR1,RALBP1
KEGG_CELL_ADHESION_MOLECULES_CAMS	Cell adhesion molecules (CAMs)	4	134	0.0299	0.00922	0.0686	ITGA6,ITGB7,PDCD1LG2,CNTNAP1
KEGG_NATURAL_KILLER_CELL_MEDIATED_CYTOTOXICITY	Natural killer cell mediated cytotoxicity	4	137	0.0292	0.00994	0.0711	PRKCA,PPP3CB,SYK,RAET1E
KEGG_ADHERENS_JUNCTION	Adherens junction	3	75	0.04	0.0108	0.072	TGFBR1,SORBS1,FARP2
KEGG_GLYCOSAMINOGLYCAN_BIOSYNTHESIS_HEPARAN_SULFATE	Glycosaminoglycan biosynthesis - heparan sulfate	2	26	0.0769	0.0108	0.072	HS6ST1,HS3ST1
KEGG_VEGF_SIGNALING_PATHWAY	VEGF signaling pathway	3	76	0.0395	0.0112	0.072	PRKCA,PPP3CB,MAPKAPK2
KEGG_HISTIDINE_METABOLISM	Histidine metabolism	2	29	0.069	0.0134	0.083	ACY3,ALDH1A3
KEGG_ECM_RECEPTOR_INTERACTION	ECM-receptor interaction	3	84	0.0357	0.0147	0.0854	ITGA6,LAMC3,ITGB7
KEGG_SMALL_CELL_LUNG_CANCER	Small cell lung cancer	3	84	0.0357	0.0147	0.0854	ITGA6,LAMC3,RXRA
KEGG_HYPERTROPHIC_CARDIOMYOPATHY_HCM	Hypertrophic cardiomyopathy (HCM)	3	85	0.0353	0.0152	0.0855	IGF1,ITGA6,ITGB7
KEGG_PROGESTERONE_MEDIATED_OOCYTE_MATURATION	Progesterone-mediated oocyte maturation	3	86	0.0349	0.0156	0.0856	IGF1,ADCY9,CCNB3
KEGG_ALANINE_ASPARTATE_AND_GLUTAMATE_METABOLISM	Alanine, aspartate and glutamate metabolism	2	32	0.0625	0.0162	0.0859	ACY3,GFPT1
KEGG_PROPANOATE_METABOLISM	Propanoate metabolism	2	33	0.0606	0.0171	0.0885	ACACA,SUCLA2
KEGG_ALZHEIMERS_DISEASE	Alzheimer's disease	4	169	0.0237	0.02	0.101	PPP3CB,GNAQ,HSD17B10,UQCRFS1
KEGG_FC_GAMMA_R_MEDIATED_PHAGOCYTOSIS	Fc gamma R-mediated phagocytosis	3	97	0.0309	0.0215	0.105	PRKCA,SYK,GAB2
KEGG_ALDOSTERONE_REGULATED_SODIUM_REABSORPTION	Aldosterone-regulated sodium reabsorption	2	42	0.0476	0.027	0.125	PRKCA,IGF1
KEGG_BLADDER_CANCER	Bladder cancer	2	42	0.0476	0.027	0.125	VEGFC,DAPK2
KEGG_ABC_TRANSPORTERS	ABC transporters	2	44	0.0455	0.0294	0.127	ABCB9,ABCA12
KEGG_VALINE_LEUCINE_AND_ISOLEUCINE_DEGRADATION	Valine, leucine and isoleucine degradation	2	44	0.0455	0.0294	0.127	HSD17B10,AUH
KEGG_VASOPRESSIN_REGULATED_WATER_REABSORPTION	Vasopressin-regulated water reabsorption	2	44	0.0455	0.0294	0.127	ADCY9,CREB3L2
KEGG_OOCYTE_MEIOSIS	Oocyte meiosis	3	114	0.0263	0.0325	0.137	IGF1,PPP3CB,ADCY9
KEGG_LEUKOCYTE_TRANSENDOTHELIAL_MIGRATION	Leukocyte transendothelial migration	3	118	0.0254	0.0355	0.145	PRKCA,MYL9,NCF2
KEGG_GLYCEROLIPID_METABOLISM	Glycerolipid metabolism	2	49	0.0408	0.0358	0.145	MBOAT1,MGLL
KEGG_MTOR_SIGNALING_PATHWAY	mTOR signaling pathway	2	52	0.0385	0.0399	0.158	VEGFC,IGF1
KEGG_AMYOTROPHIC_LATERAL_SCLEROSIS_ALS	Amyotrophic lateral sclerosis (ALS)	2	53	0.0377	0.0413	0.158	PPP3CB,DERL1
KEGG_NEUROTROPHIN_SIGNALING_PATHWAY	Neurotrophin signaling pathway	3	126	0.0238	0.0418	0.158	MAPKAPK2,NTRK2,CSK
KEGG_NON_SMALL_CELL_LUNG_CANCER	Non-small cell lung cancer	2	54	0.037	0.0427	0.158	PRKCA,RXRA
KEGG_CELL_CYCLE	Cell cycle	3	128	0.0234	0.0434	0.158	CCND3,E2F5,CCNB3
KEGG_VIBRIO_CHOLERAE_INFECTION	Vibrio cholerae infection	2	56	0.0357	0.0456	0.163	PRKCA,ADCY9
KEGG_UBIQUITIN_MEDIATED_PROTEOLYSIS	Ubiquitin mediated proteolysis	3	138	0.0217	0.0522	0.183	NEDD4,WWP2,UBE2W
KEGG_COLORECTAL_CANCER	Colorectal cancer	2	62	0.0323	0.0547	0.189	TGFBR1,AXIN2
KEGG_GLIOMA	Glioma	2	65	0.0308	0.0595	0.201	PRKCA,IGF1
KEGG_EPITHELIAL_CELL_SIGNALING_IN_HELICOBACTER_PYLORI_INFECTION	Epithelial cell signaling in Helicobacter pylori infection	2	68	0.0294	0.0644	0.214	MAP2K4,CSK
KEGG_MELANOMA	Melanoma	2	71	0.0282	0.0695	0.227	IGF1,FGF1
KEGG_CHRONIC_MYELOID_LEUKEMIA	Chronic myeloid leukemia	2	73	0.0274	0.0729	0.234	TGFBR1,GAB2
KEGG_B_CELL_RECEPTOR_SIGNALING_PATHWAY	B cell receptor signaling pathway	2	75	0.0267	0.0764	0.241	PPP3CB,SYK
KEGG_ARRHYTHMOGENIC_RIGHT_VENTRICULAR_CARDIOMYOPATHY_ARVC	Arrhythmogenic right ventricular cardiomyopathy (ARVC)	2	76	0.0263	0.0781	0.242	ITGA6,ITGB7
KEGG_PEROXISOME	Peroxisome	2	78	0.0256	0.0817	0.249	ACOX2,PIPOX
KEGG_ERBB_SIGNALING_PATHWAY	ErbB signaling pathway	2	87	0.023	0.0983	0.291	PRKCA,MAP2K4
KEGG_HEMATOPOIETIC_CELL_LINEAGE	Hematopoietic cell lineage	2	88	0.0227	0.1	0.291	ITGA6,CSF1
KEGG_ANTIGEN_PROCESSING_AND_PRESENTATION	Antigen processing and presentation	2	89	0.0225	0.102	0.291	HSPA2,CANX
KEGG_PROSTATE_CANCER	Prostate cancer	2	89	0.0225	0.102	0.291	IGF1,CREB3L2
KEGG_HUNTINGTONS_DISEASE	Huntington's disease	3	185	0.0162	0.103	0.291	GNAQ,CREB3L2,UQCRFS1
KEGG_TIGHT_JUNCTION	Tight junction	2	134	0.0149	0.196	0.543	PRKCA,MYL9
KEGG_INSULIN_SIGNALING_PATHWAY	Insulin signaling pathway	2	137	0.0146	0.202	0.554	SORBS1,ACACA
KEGG_JAK_STAT_SIGNALING_PATHWAY	Jak-STAT signaling pathway	2	155	0.0129	0.242	0.654	CCND3,IL22RA1
KEGG_PURINE_METABOLISM	Purine metabolism	2	159	0.0126	0.251	0.668	ENTPD4,ADCY9

## Sheet: H358_FXR1_KD_D5_uniq
Gene Set Name	Description	# Genes in Overlap (k)	# Genes (K)	k/K	p-value	FDR q-value	Genes
KEGG_CELL_CYCLE	Cell cycle	35	128	0.2734	5.87e-22	1.09e-19	PCNA,MCM2,MCM3,MCM4,MCM5,MCM6,TGFB2,MYC,CCND1,CDKN2A,E2F1,E2F2,RB1,CCNE1,CCNE2,CDKN2B,SKP2,GADD45A,CHEK1,ATR,RBL1,TFDP1,PKMYT1,SMC1B,SMC1A,ESPL1,PRKDC,STAG1,CDKN1C,ORC1,ORC5,CDC7,CDC45,CDC14A,CDC6
KEGG_DNA_REPLICATION	DNA replication	20	36	0.5556	2.02e-20	1.88e-18	PCNA,MCM2,MCM3,MCM4,MCM5,MCM6,POLD3,POLE3,POLE,POLE2,POLA1,PRIM1,PRIM2,LIG1,RPA2,RFC2,RFC3,RFC5,FEN1,DNA2
KEGG_PURINE_METABOLISM	Purine metabolism	31	159	0.195	4.14e-15	2.57e-13	POLD3,POLE3,POLE,POLE2,POLA1,PRIM1,PRIM2,RRM2,POLR3G,POLR3C,POLR1D,POLR3GL,POLR2J2,POLR2A,POLR1A,POLR1E,NME3,ENTPD1,ADCY6,GUCY1B3,NPR2,PDE3A,HPRT1,PRPS1L1,PRPS1,AK1,AK4,GMPR2,PDE2A,PDE7A,PDE9A
KEGG_PYRIMIDINE_METABOLISM	Pyrimidine metabolism	22	98	0.2245	1.97e-12	9.14e-11	POLD3,POLE3,POLE,POLE2,POLA1,PRIM1,PRIM2,RRM2,POLR3G,POLR3C,POLR1D,POLR3GL,POLR2J2,POLR2A,POLR1A,POLR1E,NME3,ENTPD1,TYMS,TK1,UMPS,UPP1
KEGG_PATHWAYS_IN_CANCER	Pathways in cancer	38	328	0.1159	8.2e-11	2.9e-09	TGFB2,MYC,CCND1,CDKN2A,E2F1,E2F2,RB1,CCNE1,CCNE2,CDKN2B,SKP2,RAC3,MLH1,MSH2,TGFBR2,MAPK9,MAPK10,MECOM,JUN,PDGFB,FGF19,PIK3CD,RAD51,BRCA2,CBLB,RUNX1,APC,CASP8,ITGA2B,XIAP,PLCG2,MTOR,GSTP1,IL8,IL6,MITF,WNT7B,PAX8
KEGG_AXON_GUIDANCE	Axon guidance	23	129	0.1783	9.34e-11	2.9e-09	RAC3,PAK1,NFATC4,GNAI1,PAK4,LIMK2,DPYSL2,EFNA2,EFNB2,EPHA1,NTNG1,PLXNB2,RND1,PLXNB1,DPYSL5,SEMA3G,RGS3,SEMA3F,SEMA4A,SEMA6D,NRP1,NTN1,SRGAP3
KEGG_MISMATCH_REPAIR	Mismatch repair	10	23	0.4348	1.69e-09	3.96e-08	PCNA,POLD3,LIG1,RPA2,RFC2,RFC3,RFC5,MLH1,MSH2,EXO1
KEGG_NUCLEOTIDE_EXCISION_REPAIR	Nucleotide excision repair	13	44	0.2955	1.7e-09	3.96e-08	PCNA,POLD3,POLE3,POLE,POLE2,LIG1,RPA2,RFC2,RFC3,RFC5,GTF2H2,ERCC4,ERCC6
KEGG_MAPK_SIGNALING_PATHWAY	MAPK signaling pathway	31	267	0.1161	4.14e-09	8.57e-08	TGFB2,MYC,GADD45A,RAC3,TGFBR2,MAPK9,MAPK10,MECOM,JUN,PDGFB,FGF19,PAK1,NFATC4,PLA2G4B,PLA2G4A,ZAK,FLNA,MAP2K3,RPS6KA5,MAP3K1,BDNF,NTF4,CACNB4,CACNA2D2,CACNA1I,CACNA1H,HSPA1B,DDIT3,DUSP1,MAPK8IP2,NR4A1
KEGG_BASE_EXCISION_REPAIR	Base excision repair	10	35	0.2857	1.87e-07	3.47e-06	PCNA,POLD3,POLE3,POLE,POLE2,LIG1,FEN1,PARP1,MPG,NEIL3
KEGG_ARACHIDONIC_ACID_METABOLISM	Arachidonic acid metabolism	12	58	0.2069	5.36e-07	9.06e-06	PLA2G4B,PLA2G4A,GGT1,GPX1,GPX2,EPHX2,CYP2E1,AKR1C3,CYP2U1,PTGS1,TBXAS1,PTGES
KEGG_PANCREATIC_CANCER	Pancreatic cancer	13	70	0.1857	6.79e-07	1.05e-05	TGFB2,CCND1,CDKN2A,E2F1,E2F2,RB1,RAC3,TGFBR2,MAPK9,MAPK10,PIK3CD,RAD51,BRCA2
KEGG_ONE_CARBON_POOL_BY_FOLATE	One carbon pool by folate	7	17	0.4118	8.01e-07	1.15e-05	TYMS,FTCD,DHFR,MTR,MTHFD2,MTHFD1,ALDH1L1
KEGG_CHRONIC_MYELOID_LEUKEMIA	Chronic myeloid leukemia	13	73	0.1781	1.12e-06	1.42e-05	TGFB2,MYC,CCND1,CDKN2A,E2F1,E2F2,RB1,TGFBR2,MECOM,PIK3CD,CBLB,RUNX1,SHC2
KEGG_COLORECTAL_CANCER	Colorectal cancer	12	62	0.1935	1.14e-06	1.42e-05	TGFB2,MYC,CCND1,RAC3,MLH1,MSH2,TGFBR2,MAPK9,MAPK10,JUN,PIK3CD,APC
KEGG_HOMOLOGOUS_RECOMBINATION	Homologous recombination	8	28	0.2857	3.21e-06	3.73e-05	POLD3,RPA2,RAD51,BRCA2,RAD54B,BLM,XRCC2,RAD54L
KEGG_P53_SIGNALING_PATHWAY	p53 signaling pathway	12	69	0.1739	3.74e-06	3.9e-05	CCND1,CDKN2A,CCNE1,CCNE2,GADD45A,CHEK1,ATR,RRM2,CASP8,BBC3,STEAP3,SESN2
KEGG_TIGHT_JUNCTION	Tight junction	17	134	0.1269	3.78e-06	3.9e-05	GNAI1,ZAK,MYH14,MYH11,PRKCH,F11R,JAM3,PPP2R1B,CLDN1,CLDN7,CLDN2,MYH15,EPB41L2,TJP3,LLGL2,MPDZ,CRB3
KEGG_RNA_POLYMERASE	RNA polymerase	8	29	0.2759	4.3e-06	4.21e-05	POLR3G,POLR3C,POLR1D,POLR3GL,POLR2J2,POLR2A,POLR1A,POLR1E
KEGG_REGULATION_OF_ACTIN_CYTOSKELETON	Regulation of actin cytoskeleton	22	216	0.1019	6.25e-06	5.81e-05	RAC3,PDGFB,FGF19,PIK3CD,APC,ITGA2B,PAK1,PAK4,LIMK2,MYH14,MYLK,PPP1R12A,PDGFD,ITGB3,ITGA7,TIAM2,ARPC1B,SLC9A1,DIAPH2,ARHGEF4,BRK1,DIAPH3
KEGG_GLYCINE_SERINE_AND_THREONINE_METABOLISM	Glycine, serine and threonine metabolism	8	31	0.2581	7.43e-06	6.58e-05	AOC2,GATM,CTH,PHGDH,GLDC,PSAT1,CHDH,PSPH
KEGG_FOCAL_ADHESION	Focal adhesion	20	201	0.0995	2.28e-05	0.000193	CCND1,RAC3,MAPK9,MAPK10,JUN,PDGFB,PIK3CD,ITGA2B,XIAP,PAK1,PAK4,FLNA,SHC2,MYLK,PPP1R12A,PDGFD,ITGB3,ITGA7,COL5A2,TLN2
KEGG_SMALL_CELL_LUNG_CANCER	Small cell lung cancer	12	84	0.1429	2.98e-05	0.000241	MYC,CCND1,E2F1,E2F2,RB1,CCNE1,CCNE2,CDKN2B,SKP2,PIK3CD,ITGA2B,XIAP
KEGG_GLYCEROLIPID_METABOLISM	Glycerolipid metabolism	9	49	0.1837	3.88e-05	0.0003	ALDH2,ALDH1B1,ALDH3A2,DGKA,AGPAT1,AGPAT4,AKR1A1,CEL,DGAT2
KEGG_VASCULAR_SMOOTH_MUSCLE_CONTRACTION	Vascular smooth muscle contraction	14	115	0.1217	4.22e-05	0.000304	ADCY6,GUCY1B3,NPR2,PLA2G4B,PLA2G4A,MYH11,PRKCH,MYLK,PPP1R12A,ITPR1,ADORA2A,EDNRA,KCNMB4,ACTA2
KEGG_ERBB_SIGNALING_PATHWAY	ErbB signaling pathway	12	87	0.1379	4.26e-05	0.000304	MYC,MAPK9,MAPK10,JUN,PIK3CD,CBLB,PLCG2,MTOR,PAK1,PAK4,SHC2,EIF4EBP1
KEGG_HISTIDINE_METABOLISM	Histidine metabolism	7	29	0.2414	4.48e-05	0.000304	FTCD,ALDH2,ALDH1B1,ALDH3A2,HEMK1,AMDHD1,HNMT
KEGG_GLUTATHIONE_METABOLISM	Glutathione metabolism	9	50	0.18	4.58e-05	0.000304	RRM2,GSTP1,GGT1,GPX1,GPX2,GSTK1,IDH2,GSTA4,GSTT1
KEGG_TOLL_LIKE_RECEPTOR_SIGNALING_PATHWAY	Toll-like receptor signaling pathway	13	102	0.1275	4.84e-05	0.00031	MAPK9,MAPK10,JUN,PIK3CD,CASP8,IL8,IL6,MAP2K3,IRF7,CTSK,IRF5,TLR9,TLR3
KEGG_AMINOACYL_TRNA_BIOSYNTHESIS	Aminoacyl-tRNA biosynthesis	8	41	0.1951	6.63e-05	0.000411	MARS2,AARS,GARS,DARS2,SARS,TARS,CARS,YARS
KEGG_GLIOMA	Glioma	10	65	0.1538	7.14e-05	0.000428	CCND1,CDKN2A,E2F1,E2F2,RB1,PDGFB,PIK3CD,PLCG2,MTOR,SHC2
KEGG_BLADDER_CANCER	Bladder cancer	8	42	0.1905	7.95e-05	0.000462	MYC,CCND1,CDKN2A,E2F1,E2F2,RB1,IL8,RPS6KA5
KEGG_NEUROTROPHIN_SIGNALING_PATHWAY	Neurotrophin signaling pathway	14	126	0.1111	0.000115	0.000649	MAPK9,MAPK10,JUN,PIK3CD,PLCG2,RPS6KA5,MAP3K1,BDNF,NTF4,SHC2,NGFR,CAMK4,FRS2,MAGED1
KEGG_MELANOMA	Melanoma	10	71	0.1408	0.000153	0.000812	CCND1,CDKN2A,E2F1,E2F2,RB1,PDGFB,FGF19,PIK3CD,MITF,PDGFD
KEGG_RIG_I_LIKE_RECEPTOR_SIGNALING_PATHWAY	RIG-I-like receptor signaling pathway	10	71	0.1408	0.000153	0.000812	MAPK9,MAPK10,CASP8,IL8,MAP3K1,IRF7,TRADD,DDX3X,DDX3Y,ISG15
KEGG_CYTOKINE_CYTOKINE_RECEPTOR_INTERACTION	Cytokine-cytokine receptor interaction	22	267	0.0824	0.000157	0.000812	TGFB2,TGFBR2,PDGFB,IL8,IL6,NGFR,LEPR,IL7,IL11,IL15RA,CNTF,CTF1,IL6ST,IL10RB,IL20RB,OSMR,TNFRSF1B,IL1RAP,CCL28,CXCR3,CXCR5,TNFRSF11A
KEGG_GLYCOSPHINGOLIPID_BIOSYNTHESIS_LACTO_AND_NEOLACTO_SERIES	Glycosphingolipid biosynthesis - lacto and neolacto series	6	26	0.2308	0.000208	0.00104	B3GALT5,FUT1,ST3GAL3,FUT3,FUT4,ST3GAL4
KEGG_PROSTATE_CANCER	Prostate cancer	11	89	0.1236	0.000238	0.00117	CCND1,E2F1,E2F2,RB1,CCNE1,CCNE2,PDGFB,PIK3CD,MTOR,GSTP1,PDGFD
KEGG_GLYCEROPHOSPHOLIPID_METABOLISM	Glycerophospholipid metabolism	10	77	0.1299	0.000302	0.00144	PLA2G4B,PLA2G4A,DGKA,AGPAT1,AGPAT4,LPCAT4,LPCAT2,CHKA,LCAT,PTDSS1
KEGG_JAK_STAT_SIGNALING_PATHWAY	Jak-STAT signaling pathway	15	155	0.0968	0.000312	0.00145	MYC,CCND1,PIK3CD,CBLB,IL6,LEPR,IL7,IL11,IL15RA,CNTF,CTF1,IL6ST,IL10RB,IL20RB,OSMR
KEGG_PEROXISOME	Peroxisome	10	78	0.1282	0.000335	0.00152	EPHX2,GSTK1,IDH2,HMGCL,ACSL5,CAT,AGPS,HACL1,PEX26,PEX3
KEGG_PYRUVATE_METABOLISM	Pyruvate metabolism	7	40	0.175	0.000385	0.0017	ALDH2,ALDH1B1,ALDH3A2,PCK2,GLO1,HAGH,HAGHL
KEGG_EPITHELIAL_CELL_SIGNALING_IN_HELICOBACTER_PYLORI_INFECTION	Epithelial cell signaling in Helicobacter pylori infection	9	68	0.1324	0.000519	0.00224	MAPK9,MAPK10,JUN,PLCG2,IL8,PAK1,F11R,JAM3,ATP6V0A1
KEGG_LYSINE_DEGRADATION	Lysine degradation	7	44	0.1591	0.000702	0.00294	ALDH2,ALDH1B1,ALDH3A2,PLOD2,AASDHPPT,SUV39H1,SUV39H2
KEGG_TGF_BETA_SIGNALING_PATHWAY	TGF-beta signaling pathway	10	86	0.1163	0.000737	0.00294	TGFB2,MYC,CDKN2B,RBL1,TFDP1,TGFBR2,PPP2R1B,BMP6,SMAD9,ZFYVE16
KEGG_WNT_SIGNALING_PATHWAY	Wnt signaling pathway	14	151	0.0927	0.000748	0.00294	MYC,CCND1,RAC3,MAPK9,MAPK10,JUN,APC,WNT7B,NFATC4,PPP2R1B,PPP2R5B,PRICKLE1,DKK1,VANGL1
KEGG_BETA_ALANINE_METABOLISM	beta-Alanine metabolism	5	22	0.2273	0.000769	0.00294	AOC2,ALDH2,ALDH1B1,ALDH3A2,GAD1
KEGG_GLYCOSAMINOGLYCAN_BIOSYNTHESIS_CHONDROITIN_SULFATE	Glycosaminoglycan biosynthesis - chondroitin sulfate	5	22	0.2273	0.000769	0.00294	B3GAT2,B3GAT3,UST,CHST15,CHPF
KEGG_LEUKOCYTE_TRANSENDOTHELIAL_MIGRATION	Leukocyte transendothelial migration	12	118	0.1017	0.000775	0.00294	PIK3CD,PLCG2,GNAI1,F11R,JAM3,CLDN1,CLDN7,CLDN2,RAPGEF3,CYBA,RAPGEF4,SIPA1
KEGG_BUTANOATE_METABOLISM	Butanoate metabolism	6	34	0.1765	0.000959	0.00357	ALDH2,ALDH1B1,ALDH3A2,HMGCL,GAD1,BDH2
KEGG_GLYCOSPHINGOLIPID_BIOSYNTHESIS_GLOBO_SERIES	Glycosphingolipid biosynthesis - globo series	4	14	0.2857	0.00105	0.00384	B3GALT5,FUT1,ST3GAL2,A4GALT
KEGG_GLYCOSAMINOGLYCAN_BIOSYNTHESIS_KERATAN_SULFATE	Glycosaminoglycan biosynthesis - keratan sulfate	4	15	0.2667	0.0014	0.005	ST3GAL3,ST3GAL2,FUT8,B3GNT7
KEGG_OOCYTE_MEIOSIS	Oocyte meiosis	11	114	0.0965	0.00193	0.00679	CCNE1,CCNE2,PKMYT1,SMC1B,SMC1A,ESPL1,ADCY6,PPP2R1B,ITPR1,PPP2R5B,STAG3
KEGG_ADIPOCYTOKINE_SIGNALING_PATHWAY	Adipocytokine signaling pathway	8	67	0.1194	0.00206	0.0071	MAPK9,MAPK10,MTOR,TRADD,LEPR,TNFRSF1B,ACSL5,PCK2
KEGG_TRYPTOPHAN_METABOLISM	Tryptophan metabolism	6	40	0.15	0.0023	0.00777	ALDH2,ALDH1B1,ALDH3A2,CAT,CYP1A1,IDO1
KEGG_ARGININE_AND_PROLINE_METABOLISM	Arginine and proline metabolism	7	54	0.1296	0.00241	0.00786	GATM,ALDH2,ALDH1B1,ALDH3A2,ASS1,OAT,PYCR1
KEGG_NON_SMALL_CELL_LUNG_CANCER	Non-small cell lung cancer	7	54	0.1296	0.00241	0.00786	CCND1,CDKN2A,E2F1,E2F2,RB1,PIK3CD,PLCG2
KEGG_GNRH_SIGNALING_PATHWAY	GnRH signaling pathway	10	101	0.099	0.00252	0.00809	ADCY6,MAPK9,MAPK10,JUN,PLA2G4B,PLA2G4A,MAP2K3,MAP3K1,ITPR1,GNRH1
KEGG_METABOLISM_OF_XENOBIOTICS_BY_CYTOCHROME_P450	Metabolism of xenobiotics by cytochrome P450	8	70	0.1143	0.00273	0.00859	GSTP1,CYP2E1,AKR1C3,GSTK1,GSTA4,GSTT1,CYP1A1,CYP2S1
KEGG_INSULIN_SIGNALING_PATHWAY	Insulin signaling pathway	12	137	0.0876	0.0028	0.00866	PDE3A,MAPK9,MAPK10,PIK3CD,CBLB,MTOR,SHC2,EIF4EBP1,PCK2,PRKAR2A,FBP1,SREBF1
KEGG_UBIQUITIN_MEDIATED_PROTEOLYSIS	Ubiquitin mediated proteolysis	12	138	0.087	0.00297	0.00905	SKP2,CBLB,XIAP,MAP3K1,UBE2D4,FBXW7,BRCA1,UBE2E2,HERC2,HERC1,KLHL13,CUL7
KEGG_APOPTOSIS	Apoptosis	9	88	0.1023	0.00327	0.00981	PIK3CD,CASP8,XIAP,TRADD,IL1RAP,PRKAR2A,CAPN1,DFFA,EXOG
KEGG_VALINE_LEUCINE_AND_ISOLEUCINE_DEGRADATION	Valine, leucine and isoleucine degradation	6	44	0.1364	0.00376	0.0111	ALDH2,ALDH1B1,ALDH3A2,HMGCL,MCEE,BCAT2
KEGG_LIMONENE_AND_PINENE_DEGRADATION	Limonene and pinene degradation	3	10	0.3	0.00405	0.0118	ALDH2,ALDH1B1,ALDH3A2
KEGG_VEGF_SIGNALING_PATHWAY	VEGF signaling pathway	8	76	0.1053	0.00455	0.013	RAC3,PIK3CD,PLCG2,NFATC4,PLA2G4B,PLA2G4A,SHC2,SH2D2A
KEGG_N_GLYCAN_BIOSYNTHESIS	N-Glycan biosynthesis	6	46	0.1304	0.00471	0.0133	FUT8,MGAT3,DPM3,ALG13,ALG10,RFT1
KEGG_ETHER_LIPID_METABOLISM	Ether lipid metabolism	5	33	0.1515	0.00507	0.0141	PLA2G4B,PLA2G4A,LPCAT4,LPCAT2,AGPS
KEGG_GLYCOLYSIS_GLUCONEOGENESIS	Glycolysis / Gluconeogenesis	7	62	0.1129	0.00528	0.0145	ALDH2,ALDH1B1,ALDH3A2,AKR1A1,PCK2,FBP1,ENO3
KEGG_FOLATE_BIOSYNTHESIS	Folate biosynthesis	3	11	0.2727	0.00543	0.0146	DHFR,ALPP,PTS
KEGG_FC_EPSILON_RI_SIGNALING_PATHWAY	Fc epsilon RI signaling pathway	8	79	0.1013	0.00575	0.0149	RAC3,MAPK9,MAPK10,PIK3CD,PLCG2,PLA2G4B,PLA2G4A,MAP2K3
KEGG_CYSTEINE_AND_METHIONINE_METABOLISM	Cysteine and methionine metabolism	5	34	0.1471	0.00578	0.0149	MTR,CTH,DNMT1,DNMT3B,MTAP
KEGG_FRUCTOSE_AND_MANNOSE_METABOLISM	Fructose and mannose metabolism	5	34	0.1471	0.00578	0.0149	FBP1,GMDS,GMPPA,PMM1,MTMR6
KEGG_NITROGEN_METABOLISM	Nitrogen metabolism	4	23	0.1739	0.00729	0.0186	CTH,ASNS,CA5B,CA13
KEGG_HYPERTROPHIC_CARDIOMYOPATHY_HCM	Hypertrophic cardiomyopathy (HCM)	8	85	0.0941	0.00887	0.0223	TGFB2,ITGA2B,IL6,CACNB4,CACNA2D2,ITGB3,ITGA7,TNNI3
KEGG_SELENOAMINO_ACID_METABOLISM	Selenoamino acid metabolism	4	26	0.1538	0.0113	0.0281	GGT1,CTH,HEMK1,MARS2
KEGG_CYTOSOLIC_DNA_SENSING_PATHWAY	Cytosolic DNA-sensing pathway	6	56	0.1071	0.0122	0.0298	POLR3G,POLR3C,POLR1D,POLR3GL,IL6,IRF7
KEGG_GAP_JUNCTION	Gap junction	8	90	0.0889	0.0123	0.0298	ADCY6,GUCY1B3,PDGFB,GNAI1,PDGFD,ITPR1,TUBB,TUBB1
KEGG_VIRAL_MYOCARDITIS	Viral myocarditis	7	73	0.0959	0.0127	0.0302	CCND1,RAC3,CASP8,MYH14,MYH11,MYH15,EIF4G1
KEGG_DILATED_CARDIOMYOPATHY	Dilated cardiomyopathy	8	92	0.087	0.0139	0.0328	TGFB2,ADCY6,ITGA2B,CACNB4,CACNA2D2,ITGB3,ITGA7,TNNI3
KEGG_FATTY_ACID_METABOLISM	Fatty acid metabolism	5	42	0.119	0.0141	0.0328	ALDH2,ALDH1B1,ALDH3A2,ACSL5,ECI1
KEGG_B_CELL_RECEPTOR_SIGNALING_PATHWAY	B cell receptor signaling pathway	7	75	0.0933	0.0146	0.0334	RAC3,JUN,PIK3CD,PLCG2,NFATC4,CARD11,CD72
KEGG_ARRHYTHMOGENIC_RIGHT_VENTRICULAR_CARDIOMYOPATHY_ARVC	Arrhythmogenic right ventricular cardiomyopathy (ARVC)	7	76	0.0921	0.0156	0.0353	ITGA2B,CACNB4,CACNA2D2,ITGB3,ITGA7,CDH2,DSC2
KEGG_ACUTE_MYELOID_LEUKEMIA	Acute myeloid leukemia	6	60	0.1	0.0168	0.0373	MYC,CCND1,PIK3CD,RUNX1,MTOR,EIF4EBP1
KEGG_AMINO_SUGAR_AND_NUCLEOTIDE_SUGAR_METABOLISM	Amino sugar and nucleotide sugar metabolism	5	44	0.1136	0.017	0.0373	GMDS,GMPPA,PMM1,GALK2,CYB5R3
KEGG_VASOPRESSIN_REGULATED_WATER_REABSORPTION	Vasopressin-regulated water reabsorption	5	44	0.1136	0.017	0.0373	ADCY6,VAMP2,AQP3,NSF,DCTN5
KEGG_STEROID_BIOSYNTHESIS	Steroid biosynthesis	3	17	0.1765	0.0192	0.0415	CEL,DHCR24,TM7SF2
KEGG_NOD_LIKE_RECEPTOR_SIGNALING_PATHWAY	NOD-like receptor signaling pathway	6	62	0.0968	0.0195	0.0417	MAPK9,MAPK10,CASP8,XIAP,IL8,IL6
KEGG_NATURAL_KILLER_CELL_MEDIATED_CYTOTOXICITY	Natural killer cell mediated cytotoxicity	10	137	0.073	0.0202	0.0426	RAC3,PIK3CD,PLCG2,PAK1,NFATC4,SHC2,KLRC2,KLRC3,SH3BP2,ULBP3
KEGG_CALCIUM_SIGNALING_PATHWAY	Calcium signaling pathway	12	178	0.0674	0.0205	0.0429	PLCG2,CACNA1I,CACNA1H,MYLK,ITPR1,ADORA2A,EDNRA,CAMK4,HRH1,CYSLTR2,ATP2A3,SLC8A2
KEGG_ALANINE_ASPARTATE_AND_GLUTAMATE_METABOLISM	Alanine, aspartate and glutamate metabolism	4	32	0.125	0.0232	0.048	GAD1,ASS1,ASNS,GPT2
KEGG_LYSOSOME	Lysosome	9	121	0.0744	0.024	0.049	CTSK,ATP6V0A1,GBA,FUCA1,ARSA,AP1M2,AP4E1,PPT1,MCOLN1
KEGG_PROPANOATE_METABOLISM	Propanoate metabolism	4	33	0.1212	0.0257	0.052	ALDH2,ALDH1B1,ALDH3A2,MCEE
KEGG_PROGESTERONE_MEDIATED_OOCYTE_MATURATION	Progesterone-mediated oocyte maturation	7	86	0.0814	0.0286	0.0572	PKMYT1,ADCY6,PDE3A,MAPK9,MAPK10,PIK3CD,GNAI1
KEGG_DRUG_METABOLISM_OTHER_ENZYMES	Drug metabolism - other enzymes	5	51	0.098	0.0303	0.06	HPRT1,TK1,UMPS,UPP1,NAT1
KEGG_CHEMOKINE_SIGNALING_PATHWAY	Chemokine signaling pathway	12	190	0.0632	0.0319	0.0616	ADCY6,PIK3CD,IL8,PAK1,GNAI1,SHC2,TIAM2,CCL28,CXCR3,CXCR5,GNG2,GNB4
KEGG_ENDOMETRIAL_CANCER	Endometrial cancer	5	52	0.0962	0.0326	0.0616	MYC,CCND1,MLH1,PIK3CD,APC
KEGG_MTOR_SIGNALING_PATHWAY	mTOR signaling pathway	5	52	0.0962	0.0326	0.0616	PIK3CD,MTOR,EIF4EBP1,DDIT4,CAB39L
KEGG_T_CELL_RECEPTOR_SIGNALING_PATHWAY	T cell receptor signaling pathway	8	108	0.0741	0.0329	0.0616	MAPK9,JUN,PIK3CD,CBLB,PAK1,NFATC4,PAK4,CARD11
KEGG_LONG_TERM_DEPRESSION	Long-term depression	6	70	0.0857	0.0331	0.0616	GUCY1B3,GNAI1,PLA2G4B,PLA2G4A,PPP2R1B,ITPR1
KEGG_RENAL_CELL_CARCINOMA	Renal cell carcinoma	6	70	0.0857	0.0331	0.0616	TGFB2,JUN,PDGFB,PIK3CD,PAK1,PAK4

## Sheet: H358_FXR1_KD_D5_all
Gene Set Name	Description	# Genes in Overlap (k)	# Genes (K)	k/K	p-value	FDR q-value	Genes
KEGG_CELL_CYCLE	Cell cycle	38	128	0.2969	1.13e-22	2.1e-20	PCNA,MCM2,MCM3,MCM4,MCM5,MCM6,TGFB2,MYC,CCND1,CDKN2A,E2F1,E2F2,RB1,CCNE1,CCNE2,CDKN2B,SKP2,GADD45A,CCND3,CCNB3,CHEK1,ATR,E2F5,RBL1,TFDP1,PKMYT1,SMC1B,SMC1A,ESPL1,PRKDC,STAG1,CDKN1C,ORC1,ORC5,CDC7,CDC45,CDC14A,CDC6
KEGG_DNA_REPLICATION	DNA replication	21	36	0.5833	1.53e-20	1.43e-18	PCNA,MCM2,MCM3,MCM4,MCM5,MCM6,POLD3,POLE3,POLE,POLE2,POLA1,PRIM1,PRIM2,LIG1,RPA2,RFC2,RFC3,RFC5,FEN1,DNA2,RNASEH2B
KEGG_PATHWAYS_IN_CANCER	Pathways in cancer	49	328	0.1494	3.49e-15	2.16e-13	TGFB2,MYC,CCND1,CDKN2A,E2F1,E2F2,RB1,CCNE1,CCNE2,CDKN2B,SKP2,RAC3,MAPK9,MAPK10,PDGFB,JUN,PRKCA,TGFBR1,TGFBR2,FGF1,FGF19,MECOM,PIK3CD,VEGFC,ITGA6,ITGA2B,IGF1,XIAP,LAMC3,MLH1,MSH2,RAD51,BRCA2,RALBP1,APC,CASP8,AXIN2,CBLB,RUNX1,IL8,IL6,RXRA,DAPK2,PLCG2,MTOR,WNT7B,MITF,GSTP1,PAX8
KEGG_PURINE_METABOLISM	Purine metabolism	33	159	0.2075	8.08e-15	3.76e-13	POLD3,POLE3,POLE,POLE2,POLA1,PRIM1,PRIM2,RRM2,POLR3G,POLR3C,POLR1D,POLR3GL,POLR2J2,POLR2A,POLR1A,POLR1E,ENTPD4,NME3,ENTPD1,ADCY9,ADCY6,GUCY1B3,NPR2,PDE3A,HPRT1,PRPS1L1,PRPS1,AK1,AK4,GMPR2,PDE2A,PDE7A,PDE9A
KEGG_MAPK_SIGNALING_PATHWAY	MAPK signaling pathway	41	267	0.1536	2.4e-13	8.94e-12	TGFB2,MYC,GADD45A,RAC3,MAPK9,MAPK10,PDGFB,JUN,PRKCA,TGFBR1,TGFBR2,FGF1,FGF19,MECOM,PAK1,PPP3CB,NFATC4,FLNA,PLA2G4B,PLA2G4A,ZAK,RPS6KA5,MAP2K4,MAP3K1,MAPKAPK2,BDNF,NTF4,NTRK2,MAP2K3,CACNB4,CACNA2D2,CACNA1I,CACNA1H,HSPA1B,HSPA2,DDIT3,DUSP1,DUSP2,DUSP8,MAPK8IP2,NR4A1
KEGG_AXON_GUIDANCE	Axon guidance	27	129	0.2093	1.76e-12	5.45e-11	RAC3,PAK1,PPP3CB,NFATC4,PAK4,LIMK2,GNAI1,PLXNC1,DPYSL2,EFNA2,EFNB2,EPHA1,NTNG1,PLXNB2,RND1,PLXNB1,PLXNA3,DPYSL5,SEMA3G,RGS3,SEMA3F,SEMA4A,SEMA6D,SEMA7A,NRP1,NTN1,SRGAP3
KEGG_PYRIMIDINE_METABOLISM	Pyrimidine metabolism	23	98	0.2347	6.24e-12	1.66e-10	POLD3,POLE3,POLE,POLE2,POLA1,PRIM1,PRIM2,RRM2,POLR3G,POLR3C,POLR1D,POLR3GL,POLR2J2,POLR2A,POLR1A,POLR1E,ENTPD4,NME3,ENTPD1,TYMS,TK1,UMPS,UPP1
KEGG_FOCAL_ADHESION	Focal adhesion	29	201	0.1443	3.18e-09	7.4e-08	CCND1,CCND3,RAC3,MAPK9,MAPK10,PDGFB,JUN,PRKCA,PIK3CD,VEGFC,ITGA6,ITGA2B,IGF1,XIAP,LAMC3,PAK1,FLNA,PAK4,MYL9,MYLK,PPP1R12A,PDGFD,ITGB7,ITGB3,ITGA7,SHC2,COL5A2,PARVB,TLN2
KEGG_MISMATCH_REPAIR	Mismatch repair	10	23	0.4348	8.04e-09	1.66e-07	PCNA,POLD3,LIG1,RPA2,RFC2,RFC3,RFC5,MLH1,MSH2,EXO1
KEGG_NUCLEOTIDE_EXCISION_REPAIR	Nucleotide excision repair	13	44	0.2955	1.19e-08	2.21e-07	PCNA,POLD3,POLE3,POLE,POLE2,LIG1,RPA2,RFC2,RFC3,RFC5,GTF2H2,ERCC4,ERCC6
KEGG_PANCREATIC_CANCER	Pancreatic cancer	16	70	0.2286	1.5e-08	2.53e-07	TGFB2,CCND1,CDKN2A,E2F1,E2F2,RB1,RAC3,MAPK9,MAPK10,TGFBR1,TGFBR2,PIK3CD,VEGFC,RAD51,BRCA2,RALBP1
KEGG_REGULATION_OF_ACTIN_CYTOSKELETON	Regulation of actin cytoskeleton	28	216	0.1296	6.26e-08	9.7e-07	RAC3,PDGFB,FGF1,FGF19,PIK3CD,ITGA6,ITGA2B,APC,PAK1,PAK4,LIMK2,MYL9,MYLK,PPP1R12A,PDGFD,ITGB7,ITGB3,ITGA7,MYH14,CSK,TIAM2,ARPC1B,SLC9A1,DIAPH2,ARHGEF4,SSH3,BRK1,DIAPH3
KEGG_P53_SIGNALING_PATHWAY	p53 signaling pathway	15	69	0.2174	8.61e-08	1.23e-06	CCND1,CDKN2A,CCNE1,CCNE2,GADD45A,CCND3,CCNB3,CHEK1,ATR,IGF1,CASP8,RRM2,BBC3,STEAP3,SESN2
KEGG_ONE_CARBON_POOL_BY_FOLATE	One carbon pool by folate	8	17	0.4706	1.23e-07	1.64e-06	TYMS,FTCD,DHFR,MTR,MTHFD2,MTHFD2L,MTHFD1,ALDH1L1
KEGG_COLORECTAL_CANCER	Colorectal cancer	14	62	0.2258	1.39e-07	1.73e-06	TGFB2,MYC,CCND1,RAC3,MAPK9,MAPK10,JUN,TGFBR1,TGFBR2,PIK3CD,MLH1,MSH2,APC,AXIN2
KEGG_VASCULAR_SMOOTH_MUSCLE_CONTRACTION	Vascular smooth muscle contraction	19	115	0.1652	1.84e-07	2.08e-06	PRKCA,ADCY9,ADCY6,GUCY1B3,NPR2,PLA2G4B,PLA2G4A,MYL9,MYLK,PPP1R12A,MYH11,PRKCH,ITPR1,GNAQ,ADORA2A,EDNRA,KCNMB4,PPP1R12B,ACTA2
KEGG_CHRONIC_MYELOID_LEUKEMIA	Chronic myeloid leukemia	15	73	0.2055	1.9e-07	2.08e-06	TGFB2,MYC,CCND1,CDKN2A,E2F1,E2F2,RB1,TGFBR1,TGFBR2,MECOM,PIK3CD,CBLB,RUNX1,SHC2,GAB2
KEGG_ARACHIDONIC_ACID_METABOLISM	Arachidonic acid metabolism	13	58	0.2241	4.26e-07	4.4e-06	PLA2G4B,PLA2G4A,EPHX2,GGT1,GPX1,GPX2,CYP2E1,AKR1C3,CYP2U1,LTC4S,PTGS1,TBXAS1,PTGES
KEGG_CYTOKINE_CYTOKINE_RECEPTOR_INTERACTION	Cytokine-cytokine receptor interaction	30	267	0.1124	5.14e-07	5.04e-06	TGFB2,PDGFB,TGFBR1,TGFBR2,VEGFC,IL8,IL6,AMH,INHBB,NGFR,LEPR,IL7,IL11,IL15RA,CNTF,CTF1,IL6ST,IL10RB,IL20RB,IL22RA1,OSMR,TNFRSF1B,CCL28,CXCR6,CCR1,CXCR3,CXCR5,IL1RAP,CSF1,TNFRSF11A
KEGG_BASE_EXCISION_REPAIR	Base excision repair	10	35	0.2857	8.28e-07	7.7e-06	PCNA,POLD3,POLE3,POLE,POLE2,LIG1,FEN1,PARP1,MPG,NEIL3
KEGG_SMALL_CELL_LUNG_CANCER	Small cell lung cancer	15	84	0.1786	1.27e-06	1.13e-05	MYC,CCND1,E2F1,E2F2,RB1,CCNE1,CCNE2,CDKN2B,SKP2,PIK3CD,ITGA6,ITGA2B,XIAP,LAMC3,RXRA
KEGG_HISTIDINE_METABOLISM	Histidine metabolism	9	29	0.3103	1.36e-06	1.15e-05	FTCD,ALDH2,ALDH1B1,ALDH3A2,ACY3,ALDH1A3,HEMK1,AMDHD1,HNMT
KEGG_TIGHT_JUNCTION	Tight junction	19	134	0.1418	2.05e-06	1.66e-05	PRKCA,ZAK,GNAI1,MYL9,MYH14,MYH11,PRKCH,PPP2R1B,F11R,JAM3,CLDN1,CLDN7,CLDN2,MYH15,EPB41L2,TJP3,LLGL2,MPDZ,CRB3
KEGG_GLYCINE_SERINE_AND_THREONINE_METABOLISM	Glycine, serine and threonine metabolism	9	31	0.2903	2.54e-06	1.97e-05	PIPOX,GATM,AOC2,CTH,PHGDH,GLDC,PSAT1,CHDH,PSPH
KEGG_GLYCEROLIPID_METABOLISM	Glycerolipid metabolism	11	49	0.2245	3.23e-06	2.4e-05	ALDH2,ALDH1B1,ALDH3A2,DGKA,AGPAT1,MBOAT1,AGPAT4,AKR1A1,CEL,DGAT2,MGLL
KEGG_BLADDER_CANCER	Bladder cancer	10	42	0.2381	5.12e-06	3.67e-05	MYC,CCND1,CDKN2A,E2F1,E2F2,RB1,VEGFC,IL8,DAPK2,RPS6KA5
KEGG_TGF_BETA_SIGNALING_PATHWAY	TGF-beta signaling pathway	14	86	0.1628	8.79e-06	6.05e-05	TGFB2,MYC,CDKN2B,E2F5,RBL1,TFDP1,TGFBR1,TGFBR2,AMH,INHBB,PPP2R1B,BMP6,SMAD9,ZFYVE16
KEGG_ERBB_SIGNALING_PATHWAY	ErbB signaling pathway	14	87	0.1609	1.01e-05	6.5e-05	MYC,MAPK9,MAPK10,JUN,PRKCA,PIK3CD,CBLB,PLCG2,MTOR,PAK1,MAP2K4,PAK4,SHC2,EIF4EBP1
KEGG_GLIOMA	Glioma	12	65	0.1846	1.01e-05	6.5e-05	CCND1,CDKN2A,E2F1,E2F2,RB1,PDGFB,PRKCA,PIK3CD,IGF1,PLCG2,MTOR,SHC2
KEGG_HOMOLOGOUS_RECOMBINATION	Homologous recombination	8	28	0.2857	1.06e-05	6.56e-05	POLD3,RPA2,RAD51,BRCA2,RAD54B,BLM,XRCC2,RAD54L
KEGG_WNT_SIGNALING_PATHWAY	Wnt signaling pathway	19	151	0.1258	1.21e-05	7.26e-05	MYC,CCND1,CCND3,RAC3,MAPK9,MAPK10,JUN,PRKCA,APC,AXIN2,WNT7B,PPP3CB,NFATC4,PPP2R1B,PPP2R5B,PRICKLE1,DKK1,MMP7,VANGL1
KEGG_NEUROTROPHIN_SIGNALING_PATHWAY	Neurotrophin signaling pathway	17	126	0.1349	1.36e-05	7.9e-05	MAPK9,MAPK10,JUN,PIK3CD,PLCG2,RPS6KA5,MAP3K1,MAPKAPK2,BDNF,NTF4,NTRK2,SHC2,CSK,NGFR,CAMK4,FRS2,MAGED1
KEGG_RNA_POLYMERASE	RNA polymerase	8	29	0.2759	1.41e-05	7.95e-05	POLR3G,POLR3C,POLR1D,POLR3GL,POLR2J2,POLR2A,POLR1A,POLR1E
KEGG_MELANOMA	Melanoma	12	71	0.169	2.58e-05	0.000141	CCND1,CDKN2A,E2F1,E2F2,RB1,PDGFB,FGF1,FGF19,PIK3CD,IGF1,MITF,PDGFD
KEGG_GNRH_SIGNALING_PATHWAY	GnRH signaling pathway	14	101	0.1386	5.65e-05	0.000298	MAPK9,MAPK10,JUN,PRKCA,ADCY9,ADCY6,PLA2G4B,PLA2G4A,MAP2K4,MAP3K1,MAP2K3,ITPR1,GNAQ,GNRH1
KEGG_GLYCOSPHINGOLIPID_BIOSYNTHESIS_LACTO_AND_NEOLACTO_SERIES	Glycosphingolipid biosynthesis - lacto and neolacto series	7	26	0.2692	5.83e-05	0.000298	ST3GAL3,B4GALT4,B3GALT5,FUT1,FUT3,FUT4,ST3GAL4
KEGG_PROSTATE_CANCER	Prostate cancer	13	89	0.1461	5.93e-05	0.000298	CCND1,E2F1,E2F2,RB1,CCNE1,CCNE2,PDGFB,PIK3CD,IGF1,MTOR,GSTP1,PDGFD,CREB3L2
KEGG_TOLL_LIKE_RECEPTOR_SIGNALING_PATHWAY	Toll-like receptor signaling pathway	14	102	0.1373	6.31e-05	0.000309	MAPK9,MAPK10,JUN,PIK3CD,CASP8,IL8,IL6,MAP2K4,MAP2K3,CTSK,IRF7,IRF5,TLR9,TLR3
KEGG_PEROXISOME	Peroxisome	12	78	0.1538	6.74e-05	0.000321	EPHX2,PIPOX,GSTK1,IDH2,HMGCL,ACSL5,ACOX2,CAT,AGPS,HACL1,PEX26,PEX3
KEGG_FC_EPSILON_RI_SIGNALING_PATHWAY	Fc epsilon RI signaling pathway	12	79	0.1519	7.66e-05	0.000356	RAC3,MAPK9,MAPK10,PRKCA,PIK3CD,PLCG2,PLA2G4B,PLA2G4A,MAP2K4,MAP2K3,GAB2,SYK
KEGG_EPITHELIAL_CELL_SIGNALING_IN_HELICOBACTER_PYLORI_INFECTION	Epithelial cell signaling in Helicobacter pylori infection	11	68	0.1618	8.41e-05	0.000381	MAPK9,MAPK10,JUN,IL8,PLCG2,PAK1,MAP2K4,CSK,F11R,JAM3,ATP6V0A1
KEGG_LEUKOCYTE_TRANSENDOTHELIAL_MIGRATION	Leukocyte transendothelial migration	15	118	0.1271	8.6e-05	0.000381	PRKCA,PIK3CD,PLCG2,GNAI1,MYL9,F11R,JAM3,CLDN1,CLDN7,CLDN2,RAPGEF3,CYBA,NCF2,RAPGEF4,SIPA1
KEGG_LYSOSOME	Lysosome	15	121	0.124	0.000115	0.000496	ENTPD4,CTSK,ATP6V0A1,LIPA,GBA,FUCA1,ARSA,ABCB9,AP1M2,AP4E1,LAMP3,NAGPA,PPT1,MCOLN1,NAPSA
KEGG_GLUTATHIONE_METABOLISM	Glutathione metabolism	9	50	0.18	0.000158	0.000669	GSTP1,RRM2,GGT1,GPX1,GPX2,GSTK1,IDH2,GSTA4,GSTT1
KEGG_PYRUVATE_METABOLISM	Pyruvate metabolism	8	40	0.2	0.00017	0.000703	ALDH2,ALDH1B1,ALDH3A2,PCK2,ACACA,GLO1,HAGH,HAGHL
KEGG_JAK_STAT_SIGNALING_PATHWAY	Jak-STAT signaling pathway	17	155	0.1097	0.000191	0.000772	MYC,CCND1,CCND3,PIK3CD,CBLB,IL6,LEPR,IL7,IL11,IL15RA,CNTF,CTF1,IL6ST,IL10RB,IL20RB,IL22RA1,OSMR
KEGG_AMINOACYL_TRNA_BIOSYNTHESIS	Aminoacyl-tRNA biosynthesis	8	41	0.1951	0.000204	0.000807	MARS2,AARS,GARS,DARS2,SARS,TARS,CARS,YARS
KEGG_OOCYTE_MEIOSIS	Oocyte meiosis	14	114	0.1228	0.000212	0.00082	CCNE1,CCNE2,PKMYT1,SMC1B,SMC1A,ESPL1,IGF1,ADCY9,ADCY6,PPP3CB,ITPR1,PPP2R1B,PPP2R5B,STAG3
KEGG_GLYCOSAMINOGLYCAN_BIOSYNTHESIS_KERATAN_SULFATE	Glycosaminoglycan biosynthesis - keratan sulfate	5	15	0.3333	0.00023	0.00087	ST3GAL3,B4GALT4,ST3GAL2,FUT8,B3GNT7
KEGG_VEGF_SIGNALING_PATHWAY	VEGF signaling pathway	11	76	0.1447	0.000234	0.00087	RAC3,PRKCA,PIK3CD,PLCG2,PPP3CB,NFATC4,PLA2G4B,PLA2G4A,MAPKAPK2,SHC2,SH2D2A
KEGG_GLYCEROPHOSPHOLIPID_METABOLISM	Glycerophospholipid metabolism	11	77	0.1429	0.000263	0.000959	PLA2G4B,PLA2G4A,DGKA,AGPAT1,MBOAT1,AGPAT4,LPCAT4,LPCAT2,CHKA,LCAT,PTDSS1
KEGG_GAP_JUNCTION	Gap junction	12	90	0.1333	0.000272	0.000974	PDGFB,PRKCA,ADCY9,ADCY6,GUCY1B3,GNAI1,PDGFD,ITPR1,GNAQ,LPAR1,TUBB,TUBB1
KEGG_NON_SMALL_CELL_LUNG_CANCER	Non-small cell lung cancer	9	54	0.1667	0.000291	0.00102	CCND1,CDKN2A,E2F1,E2F2,RB1,PRKCA,PIK3CD,RXRA,PLCG2
KEGG_DILATED_CARDIOMYOPATHY	Dilated cardiomyopathy	12	92	0.1304	0.000335	0.00113	TGFB2,ITGA6,ITGA2B,IGF1,ADCY9,ADCY6,CACNB4,CACNA2D2,ITGB7,ITGB3,ITGA7,TNNI3
KEGG_LYSINE_DEGRADATION	Lysine degradation	8	44	0.1818	0.00034	0.00113	ALDH2,ALDH1B1,ALDH3A2,PIPOX,PLOD2,AASDHPPT,SUV39H1,SUV39H2
KEGG_VALINE_LEUCINE_AND_ISOLEUCINE_DEGRADATION	Valine, leucine and isoleucine degradation	8	44	0.1818	0.00034	0.00113	ALDH2,ALDH1B1,ALDH3A2,HMGCL,MCEE,HSD17B10,BCAT2,AUH
KEGG_PPAR_SIGNALING_PATHWAY	PPAR signaling pathway	10	69	0.1449	0.00044	0.00144	RXRA,ACSL5,ACOX2,PCK2,SORBS1,CYP27A1,NR1H3,FABP5,FABP6,SLC27A1
KEGG_UBIQUITIN_MEDIATED_PROTEOLYSIS	Ubiquitin mediated proteolysis	15	138	0.1087	0.000489	0.00156	SKP2,XIAP,CBLB,MAP3K1,NEDD4,WWP2,UBE2D4,UBE2W,FBXW7,BRCA1,UBE2E2,HERC2,HERC1,KLHL13,CUL7
KEGG_LONG_TERM_DEPRESSION	Long-term depression	10	70	0.1429	0.000495	0.00156	PRKCA,IGF1,GUCY1B3,PLA2G4B,PLA2G4A,GNAI1,ITPR1,GNAQ,PPP2R1B,GNAO1
KEGG_RIG_I_LIKE_RECEPTOR_SIGNALING_PATHWAY	RIG-I-like receptor signaling pathway	10	71	0.1408	0.000555	0.00172	MAPK9,MAPK10,CASP8,IL8,MAP3K1,IRF7,TRADD,DDX3X,DDX3Y,ISG15
KEGG_HYPERTROPHIC_CARDIOMYOPATHY_HCM	Hypertrophic cardiomyopathy (HCM)	11	85	0.1294	0.000626	0.00191	TGFB2,ITGA6,ITGA2B,IGF1,IL6,CACNB4,CACNA2D2,ITGB7,ITGB3,ITGA7,TNNI3
KEGG_CALCIUM_SIGNALING_PATHWAY	Calcium signaling pathway	17	178	0.0955	0.000951	0.00285	PRKCA,PLCG2,ADCY9,PPP3CB,CACNA1I,CACNA1H,MYLK,ITPR1,GNAQ,ADORA2A,EDNRA,CAMK4,HRH1,CYSLTR2,ATP2A3,ATP2B1,SLC8A2
KEGG_INSULIN_SIGNALING_PATHWAY	Insulin signaling pathway	14	137	0.1022	0.00136	0.00395	MAPK9,MAPK10,PIK3CD,CBLB,MTOR,PDE3A,SHC2,EIF4EBP1,PCK2,ACACA,SORBS1,PRKAR2A,FBP1,SREBF1
KEGG_NATURAL_KILLER_CELL_MEDIATED_CYTOTOXICITY	Natural killer cell mediated cytotoxicity	14	137	0.1022	0.00136	0.00395	RAC3,PRKCA,PIK3CD,PLCG2,PAK1,PPP3CB,NFATC4,SHC2,SYK,KLRC2,KLRC3,RAET1E,SH3BP2,ULBP3
KEGG_ARGININE_AND_PROLINE_METABOLISM	Arginine and proline metabolism	8	54	0.1481	0.0014	0.00399	ALDH2,ALDH1B1,ALDH3A2,GATM,ASS1,OAT,PYCR1,AGMAT
KEGG_ADIPOCYTOKINE_SIGNALING_PATHWAY	Adipocytokine signaling pathway	9	67	0.1343	0.00146	0.00412	MAPK9,MAPK10,RXRA,MTOR,LEPR,TNFRSF1B,ACSL5,PCK2,TRADD
KEGG_ALANINE_ASPARTATE_AND_GLUTAMATE_METABOLISM	Alanine, aspartate and glutamate metabolism	6	32	0.1875	0.00159	0.00429	ACY3,ASS1,GAD1,GFPT1,ASNS,GPT2
KEGG_BETA_ALANINE_METABOLISM	beta-Alanine metabolism	5	22	0.2273	0.00159	0.00429	ALDH2,ALDH1B1,ALDH3A2,AOC2,GAD1
KEGG_GLYCOSAMINOGLYCAN_BIOSYNTHESIS_CHONDROITIN_SULFATE	Glycosaminoglycan biosynthesis - chondroitin sulfate	5	22	0.2273	0.00159	0.00429	B3GAT2,B3GAT3,UST,CHST15,CHPF
KEGG_VASOPRESSIN_REGULATED_WATER_REABSORPTION	Vasopressin-regulated water reabsorption	7	44	0.1591	0.0018	0.00478	ADCY9,ADCY6,CREB3L2,VAMP2,AQP3,NSF,DCTN5
KEGG_PROPANOATE_METABOLISM	Propanoate metabolism	6	33	0.1818	0.00188	0.00491	ALDH2,ALDH1B1,ALDH3A2,ACACA,MCEE,SUCLA2
KEGG_GLYCOSPHINGOLIPID_BIOSYNTHESIS_GLOBO_SERIES	Glycosphingolipid biosynthesis - globo series	4	14	0.2857	0.00192	0.00492	B3GALT5,FUT1,ST3GAL2,A4GALT
KEGG_CHEMOKINE_SIGNALING_PATHWAY	Chemokine signaling pathway	17	190	0.0895	0.00193	0.00492	PIK3CD,IL8,ADCY9,ADCY6,PAK1,GNAI1,SHC2,CSK,TIAM2,CCL28,CXCR6,CCR1,CXCR3,CXCR5,GRK6,GNG2,GNB4
KEGG_METABOLISM_OF_XENOBIOTICS_BY_CYTOCHROME_P450	Metabolism of xenobiotics by cytochrome P450	9	70	0.1286	0.002	0.00502	GSTP1,CYP2E1,AKR1C3,ALDH1A3,GSTK1,GSTA4,GSTT1,CYP1A1,CYP2S1
KEGG_BUTANOATE_METABOLISM	Butanoate metabolism	6	34	0.1765	0.0022	0.00546	ALDH2,ALDH1B1,ALDH3A2,HMGCL,GAD1,BDH2
KEGG_PROGESTERONE_MEDIATED_OOCYTE_MATURATION	Progesterone-mediated oocyte maturation	10	86	0.1163	0.00247	0.00604	CCNB3,PKMYT1,MAPK9,MAPK10,PIK3CD,IGF1,ADCY9,ADCY6,PDE3A,GNAI1
KEGG_APOPTOSIS	Apoptosis	10	88	0.1136	0.00293	0.00707	PIK3CD,XIAP,CASP8,PPP3CB,IL1RAP,TRADD,PRKAR2A,CAPN1,DFFA,EXOG
KEGG_B_CELL_RECEPTOR_SIGNALING_PATHWAY	B cell receptor signaling pathway	9	75	0.12	0.00322	0.00768	RAC3,JUN,PIK3CD,PLCG2,PPP3CB,NFATC4,SYK,CARD11,CD72
KEGG_GLYCOLYSIS_GLUCONEOGENESIS	Glycolysis / Gluconeogenesis	8	62	0.129	0.00341	0.00804	ALDH2,ALDH1B1,ALDH3A2,ALDH1A3,AKR1A1,PCK2,FBP1,ENO3
KEGG_GLYCOSAMINOGLYCAN_BIOSYNTHESIS_HEPARAN_SULFATE	Glycosaminoglycan biosynthesis - heparan sulfate	5	26	0.1923	0.00347	0.00808	B3GAT2,B3GAT3,NDST1,HS6ST1,HS3ST1
KEGG_ARRHYTHMOGENIC_RIGHT_VENTRICULAR_CARDIOMYOPATHY_ARVC	Arrhythmogenic right ventricular cardiomyopathy (ARVC)	9	76	0.1184	0.00353	0.0081	ITGA6,ITGA2B,CACNB4,CACNA2D2,ITGB7,ITGB3,ITGA7,CDH2,DSC2
KEGG_STEROID_BIOSYNTHESIS	Steroid biosynthesis	4	17	0.2353	0.00415	0.00942	CEL,LIPA,DHCR24,TM7SF2
KEGG_MTOR_SIGNALING_PATHWAY	mTOR signaling pathway	7	52	0.1346	0.00475	0.0107	PIK3CD,VEGFC,IGF1,MTOR,EIF4EBP1,DDIT4,CAB39L
KEGG_TRYPTOPHAN_METABOLISM	Tryptophan metabolism	6	40	0.15	0.00511	0.0113	ALDH2,ALDH1B1,ALDH3A2,CAT,CYP1A1,IDO1
KEGG_FC_GAMMA_R_MEDIATED_PHAGOCYTOSIS	Fc gamma R-mediated phagocytosis	10	97	0.1031	0.0059	0.0129	PRKCA,PIK3CD,PLCG2,PAK1,PLA2G4B,PLA2G4A,LIMK2,ARPC1B,GAB2,SYK
KEGG_LIMONENE_AND_PINENE_DEGRADATION	Limonene and pinene degradation	3	10	0.3	0.00639	0.0138	ALDH2,ALDH1B1,ALDH3A2
KEGG_AMINO_SUGAR_AND_NUCLEOTIDE_SUGAR_METABOLISM	Amino sugar and nucleotide sugar metabolism	6	44	0.1364	0.0082	0.0175	GFPT1,GMDS,GMPPA,PMM1,GALK2,CYB5R3
KEGG_FOLATE_BIOSYNTHESIS	Folate biosynthesis	3	11	0.2727	0.00853	0.018	DHFR,ALPP,PTS
KEGG_VIRAL_MYOCARDITIS	Viral myocarditis	8	73	0.1096	0.00921	0.0192	CCND1,RAC3,CASP8,MYH14,MYH11,MYH15,EIF4G1,EIF4G3
KEGG_ETHER_LIPID_METABOLISM	Ether lipid metabolism	5	33	0.1515	0.00993	0.0205	PLA2G4B,PLA2G4A,AGPS,LPCAT4,LPCAT2
KEGG_N_GLYCAN_BIOSYNTHESIS	N-Glycan biosynthesis	6	46	0.1304	0.0102	0.0208	FUT8,MGAT3,DPM3,ALG13,ALG10,RFT1
KEGG_CYSTEINE_AND_METHIONINE_METABOLISM	Cysteine and methionine metabolism	5	34	0.1471	0.0113	0.0225	MTR,CTH,DNMT1,DNMT3B,MTAP
KEGG_FRUCTOSE_AND_MANNOSE_METABOLISM	Fructose and mannose metabolism	5	34	0.1471	0.0113	0.0225	FBP1,GMDS,GMPPA,PMM1,MTMR6
KEGG_NITROGEN_METABOLISM	Nitrogen metabolism	4	23	0.1739	0.0127	0.0252	CTH,ASNS,CA5B,CA13
KEGG_ENDOMETRIAL_CANCER	Endometrial cancer	6	52	0.1154	0.018	0.0353	MYC,CCND1,PIK3CD,MLH1,APC,AXIN2
KEGG_SELENOAMINO_ACID_METABOLISM	Selenoamino acid metabolism	4	26	0.1538	0.0196	0.0377	GGT1,HEMK1,CTH,MARS2
KEGG_AMYOTROPHIC_LATERAL_SCLEROSIS_ALS	Amyotrophic lateral sclerosis (ALS)	6	53	0.1132	0.0197	0.0377	PPP3CB,MAP2K3,GPX1,TNFRSF1B,CAT,DERL1
KEGG_ECM_RECEPTOR_INTERACTION	ECM-receptor interaction	8	84	0.0952	0.0203	0.0382	ITGA6,ITGA2B,LAMC3,ITGB7,ITGB3,ITGA7,COL5A2,SDC3
KEGG_CELL_ADHESION_MOLECULES_CAMS	Cell adhesion molecules (CAMs)	11	134	0.0821	0.0204	0.0382	ITGA6,ITGB7,F11R,JAM3,CLDN1,CLDN7,CLDN2,CDH2,SDC3,PDCD1LG2,CNTNAP1
KEGG_GLYCOSPHINGOLIPID_BIOSYNTHESIS_GANGLIO_SERIES	Glycosphingolipid biosynthesis - ganglio series	3	15	0.2	0.0209	0.0388	ST3GAL2,ST6GALNAC3,ST3GAL5
