# Supplementary material for: FXR1 regulates transcription and is required for growth of human cancer cells with TP53/FXR2 homozygous deletion
Source: eLife journal article supplement (doi:10.7554/elife.26129), 2017-08-02
Supplement: supp [file elife-26129-supp-v2.zip › elife_poa_e26129_Supplementary_File_7.xlsx]

## Sheet: TSS5k1k_peak_and_gene_exp
Table S7: Gene expression profile of genes with FXR1 occupancy at promoter.
											Ctrl			Day 3			Day 5
Gene	Gene Chrom	Gene Start	Gene End	Gene Strand	Peak Chrom	Peak Start	Peak End	Peak Score	Peak ID	RNAseq baseMean	log2FC	pvalue	padj	log2FC	pvalue	padj	log2FC	pvalue	padj
ACTR3	chr2	114642511	114648511	+	chr2	114647306	114647506	115.34	MACS_peak_406	6018.86	0.0426419	0.454856	0.684786	0.154214	0.00677495	0.0321427	0.210853	0.000241552	0.00127232
ACTR3_dup1	chr2	114642511	114648511	+	chr2	114647306	114647506	115.34	MACS_peak_406	6342.75	0.0415549	0.466471	0.694324	0.136284	0.0167494	0.0623741	0.216423	0.000164751	0.000909109
ACTR3_dup2	chr2	114643175	114649175	+	chr2	114647306	114647506	115.34	MACS_peak_406	5553.07	0.0434855	0.470166	0.697401	0.171205	0.00439125	0.0231832	0.205287	0.000704995	0.0031945
ADAMTS3	chr4	73433516	73439516	-	chr4	73433921	73434083	58.89	MACS_peak_581	170.505	0.226151	0.319345	0.562185	0.62975	0.00495868	0.0254124	1.37893	1.27e-09	2.67815e-08
ADGRL1	chr19	14315997	14321997	-	chr19	14317637	14317933	191.95	MACS_peak_338	1386.97	0.155913	0.0526398	0.192699	0.0326062	0.690325	0.81221	0.0209295	0.800157	0.881956
ADGRL1_dup1	chr19	14315997	14321997	-	chr19	14317637	14317933	191.95	MACS_peak_338	1381.61	0.153636	0.0552397	0.19885	0.0362195	0.656891	0.788712	0.0202198	0.806095	0.885775
ADGRL2_dup1	chr1	82261082	82267082	+	chr1	82266969	82267199	104.73	MACS_peak_37	368.027	0.203159	0.286766	0.52904	-0.359429	0.0620481	0.159232	0.243741	0.209028	0.344896
ADGRL2_dup2	chr1	82261082	82267082	+	chr1	82266969	82267199	104.73	MACS_peak_37	360.916	0.210705	0.272461	0.514929	-0.362672	0.0614862	0.158157	0.242694	0.214171	0.351407
ADGRL2_dup3	chr1	82261082	82267082	+	chr1	82266969	82267199	104.73	MACS_peak_37	370.459	0.206837	0.279727	0.521898	-0.356037	0.0654065	0.165203	0.244263	0.209462	0.345432
ADGRL2_dup4	chr1	82261082	82267082	+	chr1	82266969	82267199	104.73	MACS_peak_37	369.304	0.203262	0.286091	0.528215	-0.358644	0.0623661	0.159741	0.243387	0.209248	0.345186
ADPRH	chr3	119293280	119299280	+	chr3	119294304	119294448	74.93	MACS_peak_520	9.45695	0.0841222	0.889178	0.95146	0.838143	0.157847	0.309319	1.0087	0.0950337	0.18824
ADPRH_dup1	chr3	119293280	119299280	+	chr3	119294304	119294448	74.93	MACS_peak_520	8.63312	0.0552617	0.927348	NA	0.880751	0.13669	0.279934	0.973084	0.104573	0.202815
ADPRH_dup2	chr3	119293280	119299280	+	chr3	119294304	119294448	74.93	MACS_peak_520	9.50255	0.0840908	0.888526	0.951082	0.850178	0.149174	0.297537	1.02734	0.0869503	0.175647
AGAP3_dup4	chr7	150806765	150812765	+	chr7	150810422	150810561	120.33	MACS_peak_749	751.198	0.164634	0.0389031	0.158229	0.018529	0.812657	0.891121	0.176321	0.0245907	0.0631037
AIFM1	chrX	129298861	129304861	-	chrX	129299919	129300047	80.07	MACS_peak_881	1214.73	0.195152	0.00803633	0.0560334	0.0542587	0.46036	0.632404	-0.0535763	0.477097	0.627532
AIFM1_dup1	chrX	129298861	129304861	-	chrX	129299919	129300047	80.07	MACS_peak_881	1199.6	0.196917	0.00774877	0.0546198	0.0523228	0.478464	0.648292	-0.0522831	0.489759	0.639353
AIFM1_dup2	chrX	129298861	129304861	-	chrX	129299919	129300047	80.07	MACS_peak_881	1278.28	0.186271	0.00799294	0.0557959	0.03835	0.584559	0.735659	-0.053019	0.461527	0.612627
AIFM1_dup3	chrX	129298861	129304861	-	chrX	129299919	129300047	80.07	MACS_peak_881	1278.34	0.186906	0.00786403	0.0551549	0.0389739	0.57892	0.731602	-0.0513793	0.476026	0.626455
ANXA2	chr15	60689185	60695185	-	chr15	60691148	60691352	113.53	MACS_peak_247	42373.7	-0.19831	0.0388064	0.157989	0.080894	0.399057	0.577491	-0.100821	0.293333	0.444874
ANXA2_dup1	chr15	60689185	60695185	-	chr15	60691148	60691352	113.53	MACS_peak_247	41874.2	-0.197628	0.039986	0.160959	0.0827308	0.389642	0.568349	-0.101584	0.290925	0.442257
ANXA2_dup2	chr15	60689185	60695185	-	chr15	60691148	60691352	113.53	MACS_peak_247	42026.3	-0.197208	0.0402095	0.161579	0.0810991	0.398585	0.577147	-0.101594	0.290389	0.441684
ANXA2_dup3	chr15	60689185	60695185	-	chr15	60691148	60691352	113.53	MACS_peak_247	42190.2	-0.196758	0.0410409	0.163913	0.0813033	0.398276	0.576847	-0.0995082	0.301305	0.453516
AP3B1	chr5	77589579	77595579	-	chr5	77590529	77590746	79.52	MACS_peak_661	1438.35	0.0653287	0.384654	0.625368	-0.402669	1.01611e-07	3.44922e-06	-0.206836	0.00730441	0.0228327
AP3B1_dup1	chr5	77589579	77595579	-	chr5	77590529	77590746	79.52	MACS_peak_661	1427.37	0.061337	0.412208	0.648257	-0.397332	1.30658e-07	4.3125e-06	-0.210886	0.00600998	0.0193626
APBB2	chr4	41215635	41221635	-	chr4	41216480	41216724	239.44	MACS_peak_569	1359.62	-0.602027	0.00182955	0.0201355	-0.618028	0.00134117	0.00925753	-0.66304	0.000588304	0.00273549
APBB2_dup1	chr4	41215635	41221635	-	chr4	41216480	41216724	239.44	MACS_peak_569	1337.79	-0.598801	0.00189096	0.0205259	-0.623319	0.00118725	0.00841283	-0.668583	0.000513076	0.00243551
APBB2_dup2	chr4	41215635	41221635	-	chr4	41216480	41216724	239.44	MACS_peak_569	1326.43	-0.596556	0.00188734	0.0205061	-0.622518	0.00115185	0.00822053	-0.673647	0.000441877	0.0021436
APBB2_dup3	chr4	41215635	41221635	-	chr4	41216480	41216724	239.44	MACS_peak_569	1336.68	-0.599017	0.00188425	0.0204903	-0.624488	0.00116243	0.00827109	-0.66771	0.000522038	0.00247226
APBB2_dup8	chr4	41215635	41221635	-	chr4	41216480	41216724	239.44	MACS_peak_569	1351.18	-0.599244	0.00189396	0.0205532	-0.617032	0.00134377	0.00927004	-0.666481	0.000540635	0.00254386
ARHGAP20	chr11	110582912	110588912	-	chr11	110585374	110585522	59.73	MACS_peak_130	11.1599	-0.466226	0.361462	0.603774	1.07101	0.0320807	0.0995072	0.873122	0.088423	0.177835
ARHGAP20_dup1	chr11	110582912	110588912	-	chr11	110585374	110585522	59.73	MACS_peak_130	11.1285	-0.466054	0.363225	0.605295	1.0704	0.0327826	0.100991	0.908199	0.0779595	0.160912
ARHGAP20_dup2	chr11	110582451	110588451	-	chr11	110585374	110585522	59.73	MACS_peak_130	11.1285	-0.466054	0.363225	0.605295	1.0704	0.0327826	0.100991	0.908199	0.0779595	0.160912
ARHGAP20_dup3	chr11	110582451	110588451	-	chr11	110585374	110585522	59.73	MACS_peak_130	11.4698	-0.457634	0.364239	0.606199	1.02724	0.0364686	0.109037	0.910046	0.0723862	0.151767
ARHGAP20_dup4	chr11	110581773	110587773	-	chr11	110585374	110585522	59.73	MACS_peak_130	11.1613	-0.465885	0.364692	0.606687	1.06984	0.0333732	0.102326	0.871492	0.0909155	0.181643
ARID1A	chr1	27017522	27023522	+	chr1	27018671	27019181	441.32	MACS_peak_13	3594.77	0.108621	0.48339	0.707878	-0.740465	1.89342e-06	4.32705e-05	-0.00678416	0.965273	0.992296
ARID1A_dup1	chr1	27017522	27023522	+	chr1	27018671	27019181	441.32	MACS_peak_13	3912.33	0.102658	0.522812	0.737803	-0.76069	2.31658e-06	5.11709e-05	-0.000708348	0.996498	1
ARX	chrX	25033065	25039065	-	chrX	25034081	25034226	55.2	MACS_peak_871	3.75371	0.755979	0.340797	NA	0.788733	0.270543	NA	1.03822	0.168344	0.292709
ATF7IP_dup3	chr12	14532998	14538998	+	chr12	14537846	14538042	164.73	MACS_peak_141	1113.25	-0.272475	0.147847	0.361972	-0.276487	0.142083	0.28763	-0.0811888	0.667634	0.788765
ATN1_dup1	chr12	7032480	7038480	+	chr12	7034844	7034991	54.72	MACS_peak_138	3027.72	-0.345526	0.000516524	0.00811971	-0.166948	0.0904195	0.208434	-0.147883	0.133344	0.244918
BAIAP2L2	chr22	38505676	38511676	-	chr22	38506232	38506378	84.6	MACS_peak_497	111.273	-0.312173	0.153047	0.369387	0.343815	0.132145	0.273073	-0.0591884	0.795446	0.878832
BCL9	chr1	147008271	147014271	+	chr1	147011951	147012156	73.24	MACS_peak_49	1078.7	0.0401294	0.759384	0.885123	-0.122171	0.353807	0.533869	0.444284	0.000774573	0.00346823
BPNT1	chr1	220262195	220268195	-	chr1	220263130	220263371	168.93	MACS_peak_91	1076.43	0.0191926	0.771796	0.89191	0.142279	0.0284488	0.0912081	-0.0796235	0.227336	0.367297
BPNT1_dup1	chr1	220262195	220268195	-	chr1	220263130	220263371	168.93	MACS_peak_91	1063.68	0.0199745	0.765919	0.888559	0.143535	0.0292854	0.0931721	-0.0793611	0.235172	0.376956
BPNT1_dup2	chr1	220262195	220268195	-	chr1	220263130	220263371	168.93	MACS_peak_91	1059.28	0.0233174	0.728419	0.867635	0.135885	0.0389267	0.114592	-0.0937919	0.160706	0.282471
BPNT1_dup3	chr1	220262195	220268195	-	chr1	220263130	220263371	168.93	MACS_peak_91	1130.82	0.0176811	0.788434	0.901092	0.1339	0.0384761	0.113606	-0.0764104	0.244828	0.388795
C1orf132	chr1	207995048	208001048	-	chr1	207997196	207997553	290.01	MACS_peak_90	44.4083	-1.09399	0.00145706	0.0173454	0.0223854	0.94692	0.97143	-0.91743	0.00548926	0.0179442
C1orf132_dup1	chr1	207995048	208001048	-	chr1	207997196	207997553	290.01	MACS_peak_90	45.1206	-1.10505	0.00125161	0.015536	0.0398526	0.90527	0.948131	-0.896694	0.0064333	0.0205029
C1orf61	chr1	156390558	156396558	-	chr1	156391459	156391670	75.96	MACS_peak_59	83.9309	0.0574039	0.789066	0.901445	-0.370026	0.0854281	0.200129	-1.09859	5.98349e-07	6.69729e-06
C1orf61_dup1	chr1	156390558	156396558	-	chr1	156391459	156391670	75.96	MACS_peak_59	66.1323	0.0957445	0.686029	0.845513	-0.263634	0.265591	0.442984	-1.20417	7.3425e-07	8.00429e-06
C1orf61_dup10	chr1	156390558	156396558	-	chr1	156391459	156391670	75.96	MACS_peak_59	68.2476	0.0903563	0.683021	0.844066	-0.261615	0.236413	0.409364	-1.19026	1.76411e-07	2.27387e-06
C1orf61_dup11	chr1	156390558	156396558	-	chr1	156391459	156391670	75.96	MACS_peak_59	73.7461	0.0831254	0.713209	0.859125	-0.30584	0.176184	0.334758	-1.13727	8.6159e-07	9.17045e-06
C1orf61_dup2	chr1	156390558	156396558	-	chr1	156391459	156391670	75.96	MACS_peak_59	61.4205	0.0975001	0.695084	0.849716	-0.230157	0.354323	0.53446	-1.21183	1.89093e-06	1.82638e-05
C1orf61_dup3	chr1	156390558	156396558	-	chr1	156391459	156391670	75.96	MACS_peak_59	61.2792	0.106258	0.67013	0.835612	-0.231991	0.351846	0.532012	-1.21844	1.77519e-06	1.73229e-05
C21orf62-AS1	chr21	34139411	34145411	+	chr21	34144084	34144205	71.37	MACS_peak_487	1.5184	0.225461	0.817084	NA	-0.423943	0.66917	NA	0.772651	0.475181	0.625781
C21orf62-AS1_dup1	chr21	34139411	34145411	+	chr21	34144084	34144205	71.37	MACS_peak_487	1.5184	0.225461	0.817084	NA	-0.423943	0.66917	NA	0.772651	0.475181	0.625781
CAPS2	chr12	75722836	75728836	-	chr12	75724037	75724286	394.86	MACS_peak_163	19.09	-0.366977	0.379531	0.620485	-0.417399	0.310167	0.490606	-0.233728	0.575283	0.715307
CAPS2_dup1	chr12	75722836	75728836	-	chr12	75724037	75724286	394.86	MACS_peak_163	18.0381	-0.43486	0.300155	0.542784	-0.415736	0.314819	0.495297	-0.252208	0.545674	0.690494
CASC4	chr15	44575909	44581909	+	chr15	44580043	44580704	533.46	MACS_peak_234	1879.19	-0.149901	0.238684	0.478694	-0.667131	2.09382e-07	6.43598e-06	-0.609026	2.2923e-06	2.15591e-05
CASC4_dup1	chr15	44575909	44581909	+	chr15	44580043	44580704	533.46	MACS_peak_234	1828.17	-0.147349	0.237659	0.477622	-0.661279	1.58124e-07	5.07475e-06	-0.611858	1.32216e-06	1.32973e-05
CASZ1	chr1	10855733	10861733	-	chr1	10856617	10857026	442.96	MACS_peak_6	557.474	-0.0570609	0.750516	0.879827	-0.984565	2.76174e-07	8.19004e-06	-1.25479	2.58428e-09	5.10155e-08
CASZ1_dup1	chr1	10855733	10861733	-	chr1	10856617	10857026	442.96	MACS_peak_6	391.889	0.044329	0.817427	0.915443	-0.890264	7.43425e-06	0.000138017	-1.37817	5.24847e-10	1.19414e-08
CDC42EP3	chr2	37898342	37904342	-	chr2	37899361	37899503	107.69	MACS_peak_368	1761.96	-0.175191	0.197262	0.429616	0.487926	0.000305305	0.00283775	0.771969	1.23462e-08	2.11415e-07
CDC42EP3_dup1	chr2	37898342	37904342	-	chr2	37899361	37899503	107.69	MACS_peak_368	1763.45	-0.174837	0.198979	0.431276	0.487726	0.000314958	0.00290563	0.771462	1.34056e-08	2.27415e-07
CDC42EP3_dup2	chr2	37898678	37904678	-	chr2	37899361	37899503	107.69	MACS_peak_368	1760.73	-0.175081	0.197213	0.429616	0.486617	0.000313578	0.00289687	0.772622	1.17029e-08	2.01493e-07
CDC42EP3_dup3	chr2	37898342	37904342	-	chr2	37899361	37899503	107.69	MACS_peak_368	1890.3	-0.178752	0.183365	0.411966	0.473839	0.000392667	0.00346945	0.778662	6.32884e-09	1.1544e-07
CENPU	chr4	185654286	185660286	-	chr4	185655196	185655593	895.11	MACS_peak_631	1077.57	0.0768776	0.60625	0.795335	-0.0203733	0.891467	0.939767	0.503051	0.000845395	0.00373895
CENPU_dup1	chr4	185654286	185660286	-	chr4	185655196	185655593	895.11	MACS_peak_631	1022.61	0.0849219	0.573922	0.774381	-0.0158473	0.916531	0.954427	0.495239	0.00117923	0.00495318
CISD1	chr10	60023862	60029862	+	chr10	60028590	60028842	121.84	MACS_peak_102	353.286	0.314131	0.0152647	0.086927	0.0343092	0.789022	0.877877	-0.0546283	0.675159	0.79409
CITED1	chrX	71524764	71530764	-	chrX	71526785	71526978	77.79	MACS_peak_875	3.65378	0.647188	0.360136	NA	0.326875	0.635018	NA	-0.986359	0.142611	0.257948
CITED1_dup1	chrX	71526037	71532037	-	chrX	71526785	71526978	77.79	MACS_peak_875	3.68206	0.645638	0.36577	NA	0.450821	0.522823	NA	-0.983849	0.148044	0.265259
CITED1_dup2	chrX	71524764	71530764	-	chrX	71526785	71526978	77.79	MACS_peak_875	3.63273	0.647689	0.358918	NA	0.455918	0.512939	NA	-0.987097	0.141472	0.256397
CITED1_dup3	chrX	71525837	71531837	-	chrX	71526785	71526978	77.79	MACS_peak_875	3.85728	0.647111	0.351477	NA	0.439733	0.510414	NA	-0.995577	0.120094	0.225842
CPSF3	chr2	9558666	9564666	+	chr2	9563536	9563694	54.43	MACS_peak_358	1216.69	0.165383	0.0777383	0.244924	-0.129301	0.171691	0.328605	0.139072	0.147455	0.264443
CPSF3_dup1	chr2	9558666	9564666	+	chr2	9563536	9563694	54.43	MACS_peak_358	1139.5	0.162545	0.0919515	0.272061	-0.118924	0.221523	0.391481	0.130642	0.185746	0.315385
CPSF3_dup2	chr2	9558666	9564666	+	chr2	9563536	9563694	54.43	MACS_peak_358	1202.35	0.167387	0.0760477	0.241844	-0.123945	0.192936	0.356476	0.141543	0.142848	0.258249
CPSF3_dup3	chr2	9558666	9564666	+	chr2	9563536	9563694	54.43	MACS_peak_358	1199.11	0.167946	0.0742281	0.238405	-0.126263	0.183518	0.344576	0.142433	0.139278	0.253348
CPSF3_dup4	chr2	9558666	9564666	+	chr2	9563536	9563694	54.43	MACS_peak_358	1202.16	0.167096	0.0764909	0.24261	-0.124842	0.189641	0.352301	0.141543	0.142759	0.258137
CRB1	chr1	197165592	197171592	+	chr1	197170561	197170776	78.38	MACS_peak_87	2.27201	0.221372	0.80506	NA	-0.910334	0.283278	NA	0.528384	0.564899	0.707193
CSAG1	chrX	151898227	151904227	+	chrX	151903155	151903305	83.31	MACS_peak_884	332.154	-0.0538741	0.719261	0.86299	0.324024	0.0291008	0.0927498	0.115406	0.437344	0.589985
CSAG1_dup1	chrX	151898227	151904227	+	chrX	151903155	151903305	83.31	MACS_peak_884	332.37	-0.0580611	0.695848	0.850228	0.319218	0.0300077	0.0947751	0.116087	0.430409	0.583442
CSAG4	chrX	151902136	151908136	-	chrX	151903155	151903305	83.31	MACS_peak_884	44.512	0.003499	0.986162	0.998881	0.0929632	0.656148	0.788343	0.0183165	0.928913	0.970158
CXXC5	chr5	139021884	139027884	+	chr5	139027778	139027943	74.27	MACS_peak_684	1292.56	-0.017289	0.840456	0.927009	0.177381	0.0449564	0.127072	-0.189832	0.029071	0.0726453
CXXC5_dup1	chr5	139022489	139028489	+	chr5	139027778	139027943	74.27	MACS_peak_684	1292.41	-0.0176153	0.837667	0.925597	0.177789	0.0446994	0.126554	-0.189477	0.029551	0.0736889
CXXC5_dup2	chr5	139022877	139028877	+	chr5	139027778	139027943	74.27	MACS_peak_684	1495.1	-0.025098	0.752346	0.880968	0.145777	0.0751625	0.182234	-0.13337	0.0982532	0.193297
CXXC5_dup3	chr5	139022877	139028877	+	chr5	139027778	139027943	74.27	MACS_peak_684	1490.25	-0.0257961	0.745461	0.876904	0.143927	0.0786789	0.188472	-0.136188	0.0910598	0.181893
CXXC5_dup4	chr5	139023510	139029510	+	chr5	139027778	139027943	74.27	MACS_peak_684	1302.28	-0.0167643	0.844251	0.929029	0.175575	0.0458285	0.128799	-0.190276	0.0277151	0.0698441
CXXC5_dup5	chr5	139023510	139029510	+	chr5	139027778	139027943	74.27	MACS_peak_684	1300.91	-0.0178824	0.834728	0.924287	0.175928	0.046303	0.129844	-0.189995	0.0286245	0.0717381
CXXC5_dup6	chr5	139023510	139029510	+	chr5	139027778	139027943	74.27	MACS_peak_684	1305.69	-0.0170623	0.841919	0.927847	0.17801	0.0434133	0.12391	-0.185984	0.0318485	0.0783111
CXXC5_dup7	chr5	139025574	139031574	+	chr5	139027778	139027943	74.27	MACS_peak_684	1292.85	-0.0173207	0.840439	0.927009	0.176735	0.0460999	0.129376	-0.189475	0.0296502	0.0739051
CYP1A1	chr15	75016951	75022951	-	chr15	75016846	75017003	81.15	MACS_peak_260	105.632	-0.305026	0.308611	0.551081	-0.224208	0.29686	0.476168	-0.731192	0.000917811	0.00400824
CYP1A1_dup1	chr15	75016951	75022951	-	chr15	75016846	75017003	81.15	MACS_peak_260	110.272	-0.326309	0.266741	0.509316	-0.211296	0.319847	0.500239	-0.693379	0.00142669	0.00582138
CYP1A1_dup2	chr15	75016951	75022951	-	chr15	75016846	75017003	81.15	MACS_peak_260	110.363	-0.34378	0.239312	0.479518	-0.20132	0.339577	0.520406	-0.693432	0.00131044	0.00541432
CYP2R1	chr11	14912751	14918751	-	chr11	14913201	14913418	84.26	MACS_peak_106	125.266	0.418843	0.02978	0.133148	0.335494	0.0492948	0.135847	0.282661	0.0965285	0.190634
CYSRT1	chr9	140114087	140120087	+	chr9	140117893	140118111	128.79	MACS_peak_860	260.218	-0.303851	0.144964	0.357324	0.0490943	0.80883	0.88878	-0.414015	0.0407774	0.0959734
DDC-AS1	chr7	50594457	50600457	+	chr7	50594377	50594514	56.61	MACS_peak_725	1.08475	-0.603803	0.617195	NA	0	1	NA	0.573011	0.635366	NA
DDX59	chr1	200638126	200644126	-	chr1	200639128	200639399	199.91	MACS_peak_89	313.633	-0.218381	0.0947399	0.276819	-0.114568	0.380967	0.560166	-0.320169	0.0152768	0.0424565
DDX59_dup1	chr1	200634879	200640879	-	chr1	200639128	200639399	199.91	MACS_peak_89	280.129	-0.203869	0.111298	0.305416	-0.0470467	0.712083	0.827837	-0.292438	0.022922	0.0595998
DDX59_dup2	chr1	200638126	200644126	-	chr1	200639128	200639399	199.91	MACS_peak_89	355.216	-0.218581	0.0674873	0.225529	-0.0786187	0.509372	0.675049	-0.334466	0.00528986	0.0173898
DLAT	chr11	111890538	111896538	+	chr11	111895657	111895789	76.98	MACS_peak_131	1723.06	0.141493	0.0315844	0.138386	-0.23255	0.000463936	0.00396218	0.0925548	0.171646	0.297109
DNAH2	chr17	7615672	7621672	+	chr17	7620372	7620796	360.75	MACS_peak_299	1209.48	-0.875335	9.73001e-06	0.000340518	0.370463	0.0613753	0.157948	0.953854	1.5733e-06	1.55258e-05
DNAH2_dup1	chr17	7616078	7622078	+	chr17	7620372	7620796	360.75	MACS_peak_299	1.55766	-1.76635	0.0723894	NA	-0.23356	0.823793	NA	0.171107	0.866793	0.927403
DNAJC11	chr1	6760966	6766966	-	chr1	6761826	6761980	62.37	MACS_peak_2	1885.6	0.146626	0.0491902	0.18449	0.0681697	0.359333	0.539064	0.111105	0.140645	0.255271
DPP8	chr15	65809051	65815051	-	chr15	65809983	65810134	51.8	MACS_peak_254	964.145	-0.167669	0.214022	0.44973	-0.23067	0.0874454	0.203666	0.277655	0.0411497	0.0967198
DPP8_dup1	chr15	65809051	65815051	-	chr15	65809983	65810134	51.8	MACS_peak_254	945.097	-0.159528	0.2371	0.477096	-0.228072	0.0910994	0.209472	0.273175	0.044565	0.103186
DPP8_dup2	chr15	65808676	65814676	-	chr15	65809983	65810134	51.8	MACS_peak_254	925.199	-0.171687	0.194549	0.426293	-0.223916	0.0907663	0.20902	0.273218	0.0406118	0.0956765
DPP8_dup3	chr15	65809051	65815051	-	chr15	65809983	65810134	51.8	MACS_peak_254	966.682	-0.166615	0.218375	0.455149	-0.226067	0.0949985	0.215998	0.278018	0.041521	0.0974132
DPP8_dup4	chr15	65809051	65815051	-	chr15	65809983	65810134	51.8	MACS_peak_254	964.22	-0.168756	0.211919	0.446925	-0.225776	0.094998	0.215998	0.281069	0.0390872	0.0927479
DPP8_dup5	chr15	65808676	65814676	-	chr15	65809983	65810134	51.8	MACS_peak_254	928.085	-0.17215	0.193213	0.424722	-0.224688	0.0895467	0.207072	0.271175	0.0420612	0.0984295
DPP8_dup6	chr15	65809051	65815051	-	chr15	65809983	65810134	51.8	MACS_peak_254	964.89	-0.167454	0.214784	0.450634	-0.228379	0.0907515	0.208997	0.273251	0.0445321	0.103122
DPP8_dup7	chr15	65809051	65815051	-	chr15	65809983	65810134	51.8	MACS_peak_254	914.027	-0.164323	0.216107	0.452072	-0.220311	0.0973692	0.220025	0.262604	0.0499126	0.113148
E2F6	chr2	11605303	11611303	-	chr2	11606159	11606570	572.07	MACS_peak_359	527.756	0.3029	0.00139671	0.0168426	-0.227186	0.0173385	0.0639633	0.143349	0.143695	0.259387
E2F6_dup1	chr2	11605303	11611303	-	chr2	11606159	11606570	572.07	MACS_peak_359	534.271	0.299865	0.00161697	0.0185832	-0.226766	0.0178927	0.0654067	0.146159	0.137361	0.250686
E2F6_dup2	chr2	11605303	11611303	-	chr2	11606159	11606570	572.07	MACS_peak_359	532.684	0.299519	0.00143553	0.0171651	-0.229142	0.0154784	0.0588975	0.145261	0.135409	0.247919
E2F6_dup3	chr2	11605303	11611303	-	chr2	11606159	11606570	572.07	MACS_peak_359	530.239	0.302524	0.00164566	0.0187942	-0.224531	0.0203471	0.071652	0.143017	0.149868	0.267806
E2F6_dup4	chr2	11605303	11611303	-	chr2	11606159	11606570	572.07	MACS_peak_359	436.546	0.301151	0.00309275	0.028818	-0.18652	0.0679785	0.16999	0.153051	0.144815	0.260926
E2F6_dup5	chr2	11605303	11611303	-	chr2	11606159	11606570	572.07	MACS_peak_359	521.341	0.300482	0.00165312	0.0188392	-0.22495	0.0193607	0.0692577	0.136384	0.167139	0.29112
E2F6_dup6	chr2	11605303	11611303	-	chr2	11606159	11606570	572.07	MACS_peak_359	511.101	0.323311	0.000773444	0.0109703	-0.228482	0.0182837	0.0664626	0.142295	0.152121	0.270942
ELP2	chr18	33704837	33710837	+	chr18	33709298	33709452	62.37	MACS_peak_328	763.063	-0.063266	0.428046	0.661192	-0.0527978	0.509282	0.674987	-0.312355	8.80923e-05	0.000526738
ELP2_dup1	chr18	33704837	33710837	+	chr18	33709298	33709452	62.37	MACS_peak_328	781.934	-0.0632489	0.43473	0.667267	-0.0586039	0.470458	0.641433	-0.311297	0.000118331	0.000682183
ELP2_dup10	chr18	33704837	33710837	+	chr18	33709298	33709452	62.37	MACS_peak_328	768.41	-0.0515974	0.522511	0.737589	-0.0413634	0.608916	0.75329	-0.311724	0.000108861	0.00063377
ELP2_dup11	chr18	33704837	33710837	+	chr18	33709298	33709452	62.37	MACS_peak_328	803.903	-0.0650259	0.428118	0.661206	-0.0692496	0.400441	0.578489	-0.310504	0.000154074	0.000857498
ELP2_dup12	chr18	33704837	33710837	+	chr18	33709298	33709452	62.37	MACS_peak_328	771.799	-0.0716461	0.393621	0.632987	-0.071885	0.394114	0.572848	-0.285602	0.000678022	0.00309244
ELP2_dup13	chr18	33704837	33710837	+	chr18	33709298	33709452	62.37	MACS_peak_328	802.33	-0.0639719	0.435684	0.668254	-0.0690755	0.40166	0.579774	-0.309391	0.000162941	0.00090144
ELP2_dup2	chr18	33704837	33710837	+	chr18	33709298	33709452	62.37	MACS_peak_328	807.273	-0.0655557	0.418007	0.652973	-0.0582249	0.473324	0.644032	-0.318087	8.42405e-05	0.000506268
ELP2_dup3	chr18	33704837	33710837	+	chr18	33709298	33709452	62.37	MACS_peak_328	775.631	-0.0675374	0.415839	0.651301	-0.058028	0.486266	0.654959	-0.299489	0.000308078	0.00157041
ELP2_dup4	chr18	33704837	33710837	+	chr18	33709298	33709452	62.37	MACS_peak_328	796.966	-0.0642976	0.424586	0.658569	-0.0463859	0.565969	0.721979	-0.313013	0.000100302	0.000588945
ELP2_dup5	chr18	33704837	33710837	+	chr18	33709298	33709452	62.37	MACS_peak_328	821.741	-0.0637109	0.436407	0.668849	-0.0597444	0.466993	0.638452	-0.313211	0.000129449	0.000737911
ELP2_dup6	chr18	33704837	33710837	+	chr18	33709298	33709452	62.37	MACS_peak_328	781.749	-0.057979	0.478334	0.7041	-0.0669303	0.414534	0.59155	-0.313332	0.000126878	0.000725175
ELP2_dup7	chr18	33704837	33710837	+	chr18	33709298	33709452	62.37	MACS_peak_328	769.698	-0.0644118	0.421002	0.655511	-0.057784	0.471487	0.642279	-0.314123	8.47177e-05	0.000508554
ELP2_dup8	chr18	33704837	33710837	+	chr18	33709298	33709452	62.37	MACS_peak_328	802.915	-0.0632427	0.432921	0.665479	-0.0537678	0.506194	0.67229	-0.314263	9.58977e-05	0.000566673
ELP2_dup9	chr18	33704837	33710837	+	chr18	33709298	33709452	62.37	MACS_peak_328	826.053	-0.0671725	0.412585	0.648436	-0.0636356	0.439272	0.613923	-0.31746	0.000107798	0.000628121
EML2_dup1	chr19	46145985	46151985	-	chr19	46149347	46149613	170.52	MACS_peak_349	2080.35	-0.483001	0.00580565	0.0446858	0.121686	0.48468	0.653678	-0.580045	0.000845749	0.00374017
EML2_dup3	chr19	46147775	46153775	-	chr19	46149347	46149613	170.52	MACS_peak_349	2104.05	-0.480405	0.00613006	0.0463681	0.120377	0.489898	0.658405	-0.579846	0.000861466	0.00379831
EMX1	chr2	73139604	73145604	+	chr2	73143288	73143548	215.05	MACS_peak_386	0.36327	-0.608984	0.560687	NA	-0.904456	0.388161	NA	0	1	NA
EPS15_dup1	chr1	51983995	51989995	-	chr1	51985084	51985605	413.53	MACS_peak_28	1036.6	-0.163903	0.141961	0.352991	-0.0222299	0.84102	0.908016	0.305953	0.00623158	0.0199487
ERG	chr21	40032704	40038704	-	chr21	40037754	40037896	57.71	MACS_peak_490	0.0767786	0	1	NA	-0.00249465	0.997417	NA	0	1	NA
ERG_dup3	chr21	40032704	40038704	-	chr21	40037754	40037896	57.71	MACS_peak_490	0.196355	0	1	NA	0.289269	0.707547	NA	0	1	NA
ERG_dup5	chr21	40032704	40038704	-	chr21	40037754	40037896	57.71	MACS_peak_490	0.196355	0	1	NA	0.289269	0.707547	NA	0	1	NA
ERG_dup8	chr21	40032704	40038704	-	chr21	40037754	40037896	57.71	MACS_peak_490	0.0941148	0	1	NA	0.0995583	0.897187	NA	0	1	NA
EXT1	chr8	119123058	119129058	-	chr8	119125619	119125856	75.96	MACS_peak_811	2554.49	0.158824	0.0221275	0.11064	0.0715791	0.302619	0.482521	0.190826	0.00641114	0.0204391
FAAH	chr1	46854939	46860939	+	chr1	46859823	46860021	146	MACS_peak_25	158.119	0.201403	0.290173	0.532627	-0.233093	0.22248	0.39259	-0.481307	0.0120858	0.034897
FAIM	chr3	138322542	138328542	+	chr3	138328134	138328552	252.3	MACS_peak_525	190.784	0.203991	0.26851	0.511021	0.270929	0.145966	0.293029	0.740671	0.000141138	0.000794201
FAIM_dup1	chr3	138322542	138328542	+	chr3	138328134	138328552	252.3	MACS_peak_525	188.501	0.199068	0.275838	0.518338	0.277737	0.132816	0.274059	0.741002	0.000124945	0.000715169
FAIM_dup2	chr3	138322542	138328542	+	chr3	138328134	138328552	252.3	MACS_peak_525	188.254	0.197757	0.281995	0.5239	0.276464	0.13692	0.28024	0.733232	0.000160193	0.000887376
FAIM_dup3	chr3	138322919	138328919	+	chr3	138328134	138328552	252.3	MACS_peak_525	163.723	0.189933	0.304478	0.547011	0.252042	0.17873	0.338264	0.705603	0.0003398	0.00171255
FAM231D	chr1	149283235	149289235	+	chr1	149283266	149283393	56.04	MACS_peak_51	170.686	0.150568	0.285853	0.528073	0.192968	0.176881	0.335681	-0.206728	0.151441	0.269944
FAM231D_dup1	chr1	149283235	149289235	+	chr1	149283266	149283393	56.04	MACS_peak_51	101.003	0.101119	0.509741	0.728206	0.229321	0.13893	0.283222	-0.267516	0.0840464	0.171262
FAM84B	chr8	127569711	127575711	-	chr8	127570475	127570746	136.43	MACS_peak_815	3631.89	0.19347	0.130593	0.336376	-0.257379	0.0435067	0.124076	-0.36565	0.00415292	0.0142797
FBXO16	chr8	28346835	28352835	-	chr8	28347832	28348259	447.14	MACS_peak_754	59.4356	-0.320148	0.133346	0.340378	-0.21326	0.346507	0.52673	-0.903042	5.91014e-05	0.000373463
FBXO16_dup1	chr8	28346835	28352835	-	chr8	28347832	28348259	447.14	MACS_peak_754	60.5425	-0.322086	0.120706	0.320515	-0.186077	0.399694	0.5782	-0.916897	2.85857e-05	0.000197907
FER1L5	chr2	97303474	97309474	+	chr2	97304000	97304265	422.7	MACS_peak_398	3.25109	-0.189582	0.807879	NA	0.110131	0.88997	NA	-1.15707	0.211508	0.348112
FGF21	chr19	49253816	49259816	+	chr19	49256113	49256399	274.41	MACS_peak_350	0.827189	0.445466	0.720937	NA	0.678513	0.586753	NA	-0.466963	0.708074	NA
FKBP14	chr7	30065417	30071417	-	chr7	30067827	30068044	145.17	MACS_peak_719	314.948	-0.29118	0.236013	0.475595	-0.0275023	0.911421	0.951787	-0.335425	0.172631	0.298393
FKBP14_dup1	chr7	30065417	30071417	-	chr7	30067827	30068044	145.17	MACS_peak_719	297.552	-0.310268	0.201538	0.43489	-0.0198697	0.9352	0.965069	-0.354009	0.145286	0.261538
FKBP14_dup2	chr7	30065417	30071417	-	chr7	30067827	30068044	145.17	MACS_peak_719	317.834	-0.295453	0.227251	0.465422	-0.0308829	0.900177	0.945074	-0.336758	0.169188	0.293798
FUT1_dup1	chr19	49255917	49261917	-	chr19	49256113	49256399	274.41	MACS_peak_350	573.994	-0.0351672	0.796668	0.905121	-0.381752	0.00352388	0.019685	-0.657948	7.77348e-07	8.42941e-06
FUT10	chr8	33329664	33335664	-	chr8	33330562	33330826	296.99	MACS_peak_758	193.719	-0.23894	0.0566974	0.202282	-0.120938	0.326241	0.506683	0.217113	0.0975999	0.192332
FZD3	chr8	28346722	28352722	+	chr8	28347832	28348259	447.14	MACS_peak_754	459.203	-0.46379	6.51824e-07	3.31239e-05	-0.696753	3.11782e-12	2.9296e-10	-0.467499	1.04254e-05	8.13777e-05
FZD3_dup1	chr8	28346722	28352722	+	chr8	28347832	28348259	447.14	MACS_peak_754	456.561	-0.469622	3.92914e-07	2.11386e-05	-0.69365	2.91218e-12	2.74839e-10	-0.472863	7.46925e-06	6.05311e-05
GBA	chr1	155210069	155216069	-	chr1	155214400	155214851	736.12	MACS_peak_57	1504.06	0.229014	0.0816976	0.252831	0.257293	0.0515678	0.140283	0.861256	9.55578e-11	2.57429e-09
GBA_dup1	chr1	155213653	155219653	-	chr1	155214400	155214851	736.12	MACS_peak_57	1411.36	0.247375	0.0698591	0.230383	0.272301	0.0470304	0.131311	0.857394	5.11407e-10	1.16749e-08
GBA_dup2	chr1	155213653	155219653	-	chr1	155214400	155214851	736.12	MACS_peak_57	1504.32	0.241156	0.071268	0.23298	0.25699	0.0557053	0.147905	0.857245	2.26821e-10	5.60872e-09
GBA_dup3	chr1	155213653	155219653	-	chr1	155214400	155214851	736.12	MACS_peak_57	1498.56	0.243151	0.0692753	0.22918	0.259531	0.053608	0.144054	0.855455	2.58893e-10	6.2964e-09
GBA_dup4	chr1	155210066	155216066	-	chr1	155214400	155214851	736.12	MACS_peak_57	1405.9	0.229274	0.0849469	0.259315	0.273809	0.0406241	0.118171	0.85877	1.79127e-10	4.56055e-09
GBP3	chr1	89487549	89493549	-	chr1	89487416	89487571	68.56	MACS_peak_41	546.788	-0.158918	0.249708	0.491107	0.275146	0.0428584	0.122848	0.160666	0.23639	0.378537
GBP3_dup1	chr1	89487549	89493549	-	chr1	89487416	89487571	68.56	MACS_peak_41	447.453	-0.155389	0.252883	0.494494	0.302958	0.0226328	0.0773908	0.170813	0.197622	0.330307
GBP3_dup2	chr1	89487549	89493549	-	chr1	89487416	89487571	68.56	MACS_peak_41	541.691	-0.164579	0.23077	0.469624	0.279096	0.0388162	0.114345	0.159328	0.237469	0.379968
GBP3_dup3	chr1	89487549	89493549	-	chr1	89487416	89487571	68.56	MACS_peak_41	547.605	-0.165563	0.228409	0.466811	0.282901	0.0364267	0.108957	0.161712	0.231087	0.371909
GBP3_dup4	chr1	89487549	89493549	-	chr1	89487416	89487571	68.56	MACS_peak_41	349.637	-0.155678	0.386373	0.626834	0.168579	0.34225	0.522749	0.230551	0.194468	0.326211
GCLC	chr6	53408927	53414927	-	chr6	53409811	53410039	256.85	MACS_peak_697	1265.21	0.0850177	0.46933	0.696655	-0.230779	0.0501182	0.13749	0.475012	6.46763e-05	0.000403195
GCLC_dup1	chr6	53408927	53414927	-	chr6	53409811	53410039	256.85	MACS_peak_697	1236.66	0.0854268	0.471288	0.698497	-0.231674	0.0513357	0.139886	0.468215	9.5131e-05	0.000562564
GLI1	chr12	57848918	57854918	+	chr12	57853231	57853402	69.09	MACS_peak_155	6.89891	-0.553791	0.497089	NA	0.00312094	0.996767	0.998977	-0.675444	0.479066	0.629475
GLI1_dup1	chr12	57848934	57854934	+	chr12	57853231	57853402	69.09	MACS_peak_155	7.13569	0.00624156	0.993475	NA	0.180621	0.806297	0.887037	-0.328735	0.715242	0.822544
GLI1_dup2	chr12	57848934	57854934	+	chr12	57853231	57853402	69.09	MACS_peak_155	7.83692	-0.406668	0.563808	NA	0.282192	0.688622	0.810891	0.200008	0.813312	0.890881
GLIPR1L1	chr12	75723419	75729419	+	chr12	75724037	75724286	394.86	MACS_peak_163	3.49371	0.860423	0.232441	NA	-0.37149	0.567272	NA	-1.07096	0.121601	0.228031
GLIPR1L1_dup1	chr12	75723419	75729419	+	chr12	75724037	75724286	394.86	MACS_peak_163	3.37934	0.856257	0.251226	NA	-0.37225	0.584022	NA	-1.0092	0.161704	0.283881
GPC4	chrX	132548205	132554205	-	chrX	132549530	132549742	115.17	MACS_peak_883	785.121	0.14732	0.248931	0.490341	-0.636083	7.74069e-07	1.98207e-05	-0.895733	3.9691e-12	1.33373e-10
GUSBP1	chr5	21454589	21460589	+	chr5	21459426	21459544	93.04	MACS_peak_644	81.9198	0.504784	0.147474	0.361346	-0.228119	0.523861	0.686761	1.48075	6.80886e-05	0.000421081
GUSBP1_dup1	chr5	21454589	21460589	+	chr5	21459426	21459544	93.04	MACS_peak_644	43.4331	0.29363	0.263742	0.506245	-0.43758	0.105749	0.233541	1.06261	0.000165041	0.000910499
GUSBP1_dup2	chr5	21454589	21460589	+	chr5	21459426	21459544	93.04	MACS_peak_644	67.6073	-0.0117665	0.945637	0.978574	-0.0426476	0.805759	0.886826	0.183223	0.318641	0.471498
HEATR6	chr17	58155292	58161292	-	chr17	58160412	58160596	56.99	MACS_peak_315	622.395	-0.130543	0.331638	0.573977	-0.147846	0.272513	0.449885	-0.0741628	0.58141	0.72022
HIST1H2AM	chr6	27859963	27865963	-	chr6	27862888	27863074	73.22	MACS_peak_692	12.4617	0.457695	0.229723	0.468433	0.292845	0.410762	0.588179	0.126039	0.735369	0.836703
HIST1H3J	chr6	27857570	27863570	-	chr6	27862888	27863074	73.22	MACS_peak_692	4.89905	-0.637609	0.237261	NA	-0.274744	0.614852	NA	-0.481802	0.378952	0.533944
IARS2	chr1	220262455	220268455	+	chr1	220263130	220263371	168.93	MACS_peak_91	5819.34	0.133788	0.00884808	0.0598296	-0.105319	0.0407464	0.11839	0.0197341	0.70514	0.815327
IMMP2L	chr7	111201573	111207573	-	chr7	111202578	111202753	69.06	MACS_peak_742	125.004	0.107202	0.379052	0.620128	-0.255154	0.0397353	0.116192	-0.735488	8.46848e-09	1.50633e-07
IMMP2L_dup1	chr7	111201347	111207347	-	chr7	111202578	111202753	69.06	MACS_peak_742	125.883	0.0589274	0.639855	0.816518	-0.271143	0.0345202	0.104773	-0.766839	6.07571e-09	1.11123e-07
INO80C	chr18	33076613	33082613	-	chr18	33077818	33078194	186.29	MACS_peak_327	200.196	0.250156	0.162169	0.382107	0.762685	3.05652e-06	6.46869e-05	0.507887	0.00212433	0.00813776
INO80C_dup1	chr18	33076955	33082955	-	chr18	33077818	33078194	186.29	MACS_peak_327	265.632	0.287707	0.0801106	0.249859	0.704462	3.68616e-06	7.55909e-05	0.447754	0.00363132	0.0127552
INO80C_dup2	chr18	33076955	33082955	-	chr18	33077818	33078194	186.29	MACS_peak_327	261.486	0.299395	0.0644258	0.219629	0.695383	3.23191e-06	6.76653e-05	0.445587	0.00320964	0.0114917
INSR	chr19	7293313	7299313	-	chr19	7294317	7294474	102.06	MACS_peak_336	382.184	-0.725806	1.81211e-05	0.000564762	-0.0385047	0.853536	0.91568	0.0407737	0.846554	0.913003
INSR_dup1	chr19	7293313	7299313	-	chr19	7294317	7294474	102.06	MACS_peak_336	382.958	-0.715764	2.33482e-05	0.000688911	-0.0385642	0.853429	0.915605	0.0407424	0.846779	0.913204
INTS10	chr8	19669918	19675918	+	chr8	19674661	19675016	361.44	MACS_peak_751	845.491	0.0589015	0.524793	0.739139	0.00375818	0.967928	0.982688	-0.227528	0.0139249	0.0393354
INTS4	chr11	77704717	77710717	-	chr11	77705967	77706176	130.12	MACS_peak_119	697.887	-0.00852001	0.898133	0.956156	0.118941	0.0703027	0.174008	0.198761	0.00317166	0.011373
IPMK	chr10	60026694	60032694	-	chr10	60028590	60028842	121.84	MACS_peak_102	247.055	-0.247543	0.236393	0.476012	-0.91583	3.1588e-05	0.00046585	-0.373422	0.0965449	0.190642
ITGB1BP1	chr2	9561789	9567789	-	chr2	9563536	9563694	54.43	MACS_peak_358	599.179	0.0838323	0.500493	0.720726	0.103715	0.407198	0.584955	0.0608013	0.630477	0.758539
ITGB1BP1_dup1	chr2	9562698	9568698	-	chr2	9563536	9563694	54.43	MACS_peak_358	589.638	0.15551	0.242102	0.482822	0.0995584	0.456613	0.62921	0.114361	0.398573	0.55362
ITGB1BP1_dup10	chr2	9562305	9568305	-	chr2	9563536	9563694	54.43	MACS_peak_358	687.284	0.111264	0.356779	0.599396	0.0961852	0.428004	0.604291	0.0838019	0.494191	0.643573
ITGB1BP1_dup11	chr2	9562698	9568698	-	chr2	9563536	9563694	54.43	MACS_peak_358	692.782	0.128631	0.319617	0.562522	0.127944	0.324622	0.504837	0.0876634	0.503683	0.65225
ITGB1BP1_dup12	chr2	9562698	9568698	-	chr2	9563536	9563694	54.43	MACS_peak_358	526.835	0.136749	0.308014	0.550386	0.113022	0.401547	0.579668	0.0416275	0.759806	0.854144
ITGB1BP1_dup13	chr2	9562698	9568698	-	chr2	9563536	9563694	54.43	MACS_peak_358	547.378	0.128643	0.357723	0.600115	0.146966	0.295965	0.475357	0.00684728	0.961471	0.990298
ITGB1BP1_dup2	chr2	9561789	9567789	-	chr2	9563536	9563694	54.43	MACS_peak_358	668.448	0.104845	0.390416	0.629963	0.115674	0.345995	0.526279	0.0856011	0.490072	0.639564
ITGB1BP1_dup3	chr2	9562305	9568305	-	chr2	9563536	9563694	54.43	MACS_peak_358	660.945	0.111282	0.381478	0.622065	0.118275	0.35453	0.534565	0.0753696	0.559009	0.701864
ITGB1BP1_dup4	chr2	9562698	9568698	-	chr2	9563536	9563694	54.43	MACS_peak_358	577.434	0.150451	0.258659	0.500937	0.0947504	0.479552	0.649357	0.123896	0.36149	0.516294
ITGB1BP1_dup5	chr2	9562698	9568698	-	chr2	9563536	9563694	54.43	MACS_peak_358	491.976	0.136717	0.335046	0.577306	0.102829	0.471181	0.642047	0.0923066	0.522978	0.669751
ITGB1BP1_dup6	chr2	9562698	9568698	-	chr2	9563536	9563694	54.43	MACS_peak_358	632.84	0.142527	0.277712	0.520268	0.134185	0.309376	0.48973	0.0432993	0.745112	0.84393
ITGB1BP1_dup7	chr2	9562698	9568698	-	chr2	9563536	9563694	54.43	MACS_peak_358	691.194	0.125593	0.331835	0.574206	0.126694	0.330068	0.510479	0.0908146	0.489141	0.638807
ITGB1BP1_dup8	chr2	9562698	9568698	-	chr2	9563536	9563694	54.43	MACS_peak_358	685.792	0.135727	0.292706	0.535422	0.122851	0.343219	0.523702	0.0891242	0.495822	0.645074
ITGB1BP1_dup9	chr2	9562698	9568698	-	chr2	9563536	9563694	54.43	MACS_peak_358	607.338	0.115127	0.39752	0.635789	0.137745	0.313813	0.49432	0.0585184	0.671386	0.791474
KANSL3	chr2	97302797	97308797	-	chr2	97304000	97304265	422.7	MACS_peak_398	1474.16	0.0371841	0.673355	0.837631	-0.091316	0.296348	0.475688	-0.0651302	0.457549	0.608728
KANSL3_dup1	chr2	97303116	97309116	-	chr2	97304000	97304265	422.7	MACS_peak_398	1501.18	0.0358297	0.68978	0.847155	-0.0985424	0.268485	0.445841	-0.0624296	0.484426	0.634525
KANSL3_dup10	chr2	97303116	97309116	-	chr2	97304000	97304265	422.7	MACS_peak_398	1522.96	0.0368196	0.678375	0.840757	-0.0884809	0.315041	0.495475	-0.0684566	0.438176	0.590854
KANSL3_dup11	chr2	97303116	97309116	-	chr2	97304000	97304265	422.7	MACS_peak_398	1528.4	0.0378634	0.671242	0.836282	-0.088298	0.318357	0.498613	-0.0671557	0.449082	0.600915
KANSL3_dup12	chr2	97303116	97309116	-	chr2	97304000	97304265	422.7	MACS_peak_398	1476.84	0.0390818	0.64501	0.819971	-0.0711162	0.397288	0.575941	-0.0753592	0.371054	0.526171
KANSL3_dup13	chr2	97303116	97309116	-	chr2	97304000	97304265	422.7	MACS_peak_398	1500.45	0.0358566	0.689098	0.846779	-0.098792	0.266514	0.443649	-0.0626574	0.482148	0.63247
KANSL3_dup14	chr2	97303116	97309116	-	chr2	97304000	97304265	422.7	MACS_peak_398	1509.76	0.0339404	0.70947	0.857057	-0.10032	0.267111	0.444453	-0.0609213	0.501448	0.650391
KANSL3_dup15	chr2	97303116	97309116	-	chr2	97304000	97304265	422.7	MACS_peak_398	1477.86	0.0346676	0.694508	0.849515	-0.0913042	0.296821	0.47614	-0.0648058	0.460163	0.611435
KANSL3_dup16	chr2	97303116	97309116	-	chr2	97304000	97304265	422.7	MACS_peak_398	1479.6	0.0345972	0.695724	0.850126	-0.0897929	0.305955	0.486188	-0.0647989	0.461191	0.612294
KANSL3_dup17	chr2	97303116	97309116	-	chr2	97304000	97304265	422.7	MACS_peak_398	1485.45	0.0365869	0.677982	0.840514	-0.0928385	0.287924	0.466431	-0.0650774	0.457475	0.608667
KANSL3_dup18	chr2	97303116	97309116	-	chr2	97304000	97304265	422.7	MACS_peak_398	737.138	0.0484869	0.799306	0.906562	-0.359054	0.059542	0.154657	0.109018	0.568517	0.710199
KANSL3_dup2	chr2	97303116	97309116	-	chr2	97304000	97304265	422.7	MACS_peak_398	1526.74	0.0381765	0.667877	0.833908	-0.0887267	0.31476	0.495259	-0.0690463	0.435234	0.58796
KANSL3_dup3	chr2	97303116	97309116	-	chr2	97304000	97304265	422.7	MACS_peak_398	1527.47	0.0375829	0.67302	0.837381	-0.088182	0.318192	0.498467	-0.0679709	0.442836	0.595371
KANSL3_dup4	chr2	97303116	97309116	-	chr2	97304000	97304265	422.7	MACS_peak_398	1557.37	0.0378152	0.679525	0.841579	-0.0963244	0.28912	0.467771	-0.064909	0.476153	0.626547
KANSL3_dup5	chr2	97303116	97309116	-	chr2	97304000	97304265	422.7	MACS_peak_398	1558.55	0.0371683	0.685101	0.844991	-0.0974788	0.284023	0.46231	-0.0649249	0.476632	0.627026
KANSL3_dup6	chr2	97303116	97309116	-	chr2	97304000	97304265	422.7	MACS_peak_398	1550.12	0.0386853	0.668374	0.834217	-0.0960304	0.283966	0.462238	-0.0658496	0.463694	0.614761
KANSL3_dup7	chr2	97303116	97309116	-	chr2	97304000	97304265	422.7	MACS_peak_398	1550.74	0.0383291	0.671694	0.836515	-0.0953956	0.28787	0.46638	-0.0653325	0.467861	0.618895
KANSL3_dup8	chr2	97303116	97309116	-	chr2	97304000	97304265	422.7	MACS_peak_398	1549.59	0.0396377	0.661019	0.82929	-0.0950188	0.289526	0.46818	-0.0655862	0.465906	0.616828
KANSL3_dup9	chr2	97303116	97309116	-	chr2	97304000	97304265	422.7	MACS_peak_398	1559.2	0.0367631	0.688689	0.846716	-0.0972365	0.285784	0.464139	-0.064125	0.482582	0.632898
KCNIP4	chr4	21304529	21310529	-	chr4	21305732	21305904	52.07	MACS_peak_555	27.1209	-0.141082	0.602589	0.793069	-0.523461	0.0729149	0.178356	0.00689817	0.984473	1
KCNJ4_dup1	chr22	38850205	38856205	-	chr22	38852048	38852276	141.23	MACS_peak_498	44.0693	-0.281628	0.554919	0.761217	0.0657372	0.91452	0.953327	0.366421	0.625658	0.75499
KDM6B	chr17	7738224	7744224	+	chr17	7740103	7740479	333.74	MACS_peak_300	1600.88	-0.448578	0.0147962	0.0852693	-0.258612	0.160551	0.313204	-0.616929	0.000800663	0.00357013
KDM6B_dup1	chr17	7738235	7744235	+	chr17	7740103	7740479	333.74	MACS_peak_300	1611.52	-0.448541	0.0146639	0.0847633	-0.254296	0.167031	0.322417	-0.621644	0.000716736	0.00324056
KDSR	chr18	61033506	61039506	-	chr18	61034789	61035085	433.22	MACS_peak_330	679.558	-0.196239	0.0458313	0.176257	-0.0687182	0.47824	0.648235	-0.258385	0.00715999	0.0224525
KIF16B	chr20	16553079	16559079	-	chr20	16554036	16554291	157.03	MACS_peak_462	458.756	-0.161183	0.392111	0.631481	-0.0265526	0.888739	0.937927	0.251484	0.186865	0.31683
KIF16B_dup1	chr20	16553079	16559079	-	chr20	16554036	16554291	157.03	MACS_peak_462	471.174	-0.170158	0.367442	0.609554	-0.0294629	0.876909	0.930727	0.237378	0.213718	0.350822
KIF16B_dup2	chr20	16553079	16559079	-	chr20	16554036	16554291	157.03	MACS_peak_462	398.151	-0.148864	0.430465	0.663264	-0.132395	0.487367	0.656128	0.329064	0.0862349	0.174661
KIFC3_dup1	chr16	57835936	57841936	-	chr16	57840566	57840695	59.28	MACS_peak_283	1857.68	-0.444777	7.80452e-05	0.00184661	0.500896	8.6864e-06	0.000157838	-0.165872	0.139805	0.254068
KIFC3_dup3	chr16	57835439	57841439	-	chr16	57840566	57840695	59.28	MACS_peak_283	1883.2	-0.446966	6.64986e-05	0.00163535	0.49804	8.86553e-06	0.000160292	-0.164657	0.140873	0.255597
KIFC3_dup5	chr16	57835439	57841439	-	chr16	57840566	57840695	59.28	MACS_peak_283	1869.81	-0.447811	7.17843e-05	0.00173076	0.49663	1.07273e-05	0.000187481	-0.164398	0.14408	0.25991
KLHDC9	chr1	161063151	161069151	+	chr1	161067193	161067674	223.35	MACS_peak_63	60.4986	-0.274651	0.223098	0.46025	-0.409528	0.0715155	0.175995	-0.800827	0.000362685	0.0018132
KLHDC9_dup1	chr1	161063151	161069151	+	chr1	161067193	161067674	223.35	MACS_peak_63	60.1185	-0.284528	0.205856	0.439607	-0.441284	0.0520199	0.141174	-0.785492	0.000450201	0.00217795
KLHDC9_dup2	chr1	161063181	161069181	+	chr1	161067193	161067674	223.35	MACS_peak_63	65.8704	-0.208422	0.351922	0.594289	-0.470998	0.0374988	0.11135	-0.836613	0.00019874	0.00107043
KLHDC9_dup3	chr1	161063181	161069181	+	chr1	161067193	161067674	223.35	MACS_peak_63	66.0144	-0.19981	0.374585	0.616032	-0.427058	0.0601226	0.155704	-0.846006	0.000183837	0.000998006
KLLN	chr10	89622194	89628194	-	chr10	89622046	89622355	156.3	MACS_peak_103	17.5448	0.116466	0.748828	0.878667	-0.234885	0.523055	0.6863	0.166871	0.693859	0.807029
KRTCAP2	chr1	155144804	155150804	-	chr1	155145738	155145875	52.18	MACS_peak_56	1247.91	-0.0342858	0.788793	0.901254	0.513197	4.93063e-05	0.000667065	-0.0883164	0.484647	0.634726
LAMB2	chr3	49169599	49175599	-	chr3	49170365	49170704	288.79	MACS_peak_507	3625.95	-0.352399	0.00328914	0.0301112	-0.155809	0.194767	0.358703	-0.19245	0.108527	0.208716
LGR5	chr12	71828550	71834550	+	chr12	71828998	71829141	65.25	MACS_peak_161	2631.5	0.150034	0.74526	0.87685	-0.807598	0.0990227	0.222648	-0.0477748	0.950036	0.984312
LGR5_dup1	chr12	71828550	71834550	+	chr12	71828998	71829141	65.25	MACS_peak_161	3017.88	0.190341	0.657346	0.827377	-1.04038	0.024106	0.0809649	0.158048	0.830359	0.90235
LGR5_dup2	chr12	71828550	71834550	+	chr12	71828998	71829141	65.25	MACS_peak_161	2860	0.131142	0.762027	0.886426	-1.04139	0.024062	0.080874	0.158612	0.829968	0.902046
LGR5_dup3	chr12	71828550	71834550	+	chr12	71828998	71829141	65.25	MACS_peak_161	2968.33	0.190398	0.65719	0.827321	-0.988899	0.0330026	0.101509	0.158262	0.830197	0.902216
LINC00449	chr13	100152317	100158317	-	chr13	100153432	100153740	263.28	MACS_peak_192	9.30781	0.535012	0.232782	NA	-0.419311	0.382223	0.561379	1.54932	0.0222123	0.0580754
LINC01232	chr13	100150560	100156560	-	chr13	100150941	100151173	130.91	MACS_peak_191	31.4013	-0.0299134	0.914604	0.964396	-0.105414	0.70235	0.821206	-0.590955	0.0317757	0.0781782
LINC01775	chr19	2461183	2467183	-	chr19	2463116	2463303	112.95	MACS_peak_331	4.75757	-0.373922	0.573599	NA	-0.747267	0.200511	NA	-0.386228	0.540669	0.68583
LNPEP	chr5	96266346	96272346	+	chr5	96270800	96271129	267.77	MACS_peak_671	446.291	-0.103817	0.687975	0.846315	-0.698635	0.00748728	0.0347017	0.577591	0.0297824	0.0741721
LOC100996741	chr1	149283354	149289354	+	chr1	149283266	149283393	56.04	MACS_peak_51	163.716	0.1756	0.240957	0.481523	0.200296	0.186138	0.347647	-0.22453	0.141152	0.255985
LOC101928728	chr1	27019622	27025622	-	chr1	27019407	27019856	262.51	MACS_peak_14	7.99245	0.600567	0.240244	NA	0.777148	0.153215	0.303227	2.12352	0.00161439	0.00647549
LOC101928737	chr16	87522793	87528793	+	chr16	87526738	87526951	125.23	MACS_peak_296	0.176205	-0.101579	0.895113	NA	-0.104548	0.892066	NA	0	1	NA
LOC101929076	chr15	68130217	68136217	-	chr15	68132382	68132674	673.27	MACS_peak_255	5.25311	-0.458046	0.663976	NA	0.105361	0.904344	NA	-0.337059	0.714409	0.821854
LOC101929224	chr1	200633635	200639635	+	chr1	200639128	200639399	199.91	MACS_peak_89	3.20126	0.00524752	0.994623	NA	0.457971	0.537645	NA	-1.76066	0.0113289	0.0330343
LOC388282	chr16	57839549	57845549	+	chr16	57840566	57840695	59.28	MACS_peak_283	6.25359	-1.31364	0.0226172	NA	2.01866	0.000624402	NA	1.06978	0.0661725	0.141526
LOC388692	chr1	149283354	149289354	+	chr1	149283266	149283393	56.04	MACS_peak_51	163.772	0.17534	0.241542	0.482254	0.200294	0.1861	0.3476	-0.224531	0.141113	0.255924
LRRC1	chr6	53654778	53660778	+	chr6	53658475	53658691	124.23	MACS_peak_699	1459.44	0.159789	0.021864	0.10994	-0.00285617	0.966807	0.982056	-0.303838	1.44542e-05	0.000108646
LSR	chr19	35734559	35740559	+	chr19	35739016	35739175	170.32	MACS_peak_346	6570.52	-0.549143	3.50267e-08	2.54528e-06	0.26851	0.00662935	0.0316231	-0.241833	0.0144325	0.0405004
LSR_dup1	chr19	35734559	35740559	+	chr19	35739016	35739175	170.32	MACS_peak_346	7565.31	-0.506018	2.14451e-07	1.2415e-05	0.249146	0.010222	0.0436452	-0.225028	0.0203056	0.0539367
LSR_dup2	chr19	35734559	35740559	+	chr19	35739016	35739175	170.32	MACS_peak_346	7597.98	-0.50593	1.94423e-07	1.14295e-05	0.248997	0.0099907	0.0429483	-0.223618	0.0206337	0.0546828
LSR_dup3	chr19	35734559	35740559	+	chr19	35739016	35739175	170.32	MACS_peak_346	7595.37	-0.50413	2.43943e-07	1.38274e-05	0.248409	0.0105219	0.0445669	-0.223369	0.0213735	0.056282
LSR_dup4	chr19	35734559	35740559	+	chr19	35739016	35739175	170.32	MACS_peak_346	7253.51	-0.548051	1.69086e-08	1.34805e-06	0.252724	0.0088438	0.0392316	-0.231706	0.0163393	0.0449079
MAGEA12	chrX	151902101	151908101	-	chrX	151903155	151903305	83.31	MACS_peak_884	813.155	0.321822	0.00363667	0.0323094	0.05605	0.613057	0.756669	0.312979	0.00480566	0.0160797
MAGEA12_dup1	chrX	151902184	151908184	-	chrX	151903155	151903305	83.31	MACS_peak_884	849.317	0.313709	0.0036016	0.0320947	0.0478126	0.65786	0.789506	0.31117	0.00400842	0.0138594
MAGEA12_dup2	chrX	151902184	151908184	-	chrX	151903155	151903305	83.31	MACS_peak_884	837.443	0.31345	0.00418726	0.0356876	0.0516672	0.637539	0.77486	0.313885	0.0042708	0.0146329
MAML3	chr4	141074233	141080233	-	chr4	141075342	141075486	106.9	MACS_peak_609	226.132	-0.226544	0.229121	0.467797	0.172495	0.354652	0.534655	0.386472	0.0398074	0.0941168
MAST1	chr19	12944259	12950259	+	chr19	12947092	12947417	246.8	MACS_peak_337	133.534	-0.442331	0.0186428	0.0992143	0.141657	0.457065	0.62957	-0.582574	0.00215071	0.00822284
MCC_dup1	chr5	112823527	112829527	-	chr5	112824230	112824322	68.36	MACS_peak_675	119.295	0.0223307	0.92719	0.970406	-0.446555	0.0630616	0.161027	-0.0148383	0.951245	0.985255
MDGA1	chr6	37664766	37670766	-	chr6	37665685	37666027	197.12	MACS_peak_693	36.6818	-0.281951	0.392487	0.631868	-0.241829	0.478206	0.648233	-0.271547	0.440078	0.592759
MECOM_dup3	chr3	169380563	169386563	-	chr3	169381198	169381424	64.31	MACS_peak_540	652.723	0.574479	0.000137634	0.00291244	-0.011588	0.938291	0.967282	0.849348	3.31354e-08	5.09301e-07
MECOM_dup4	chr3	169380563	169386563	-	chr3	169381198	169381424	64.31	MACS_peak_540	642.134	0.566599	0.000214524	0.00407957	0.00209018	0.989032	0.994497	0.846317	5.85102e-08	8.55381e-07
MEMO1	chr2	32235121	32241121	-	chr2	32235860	32236209	229.32	MACS_peak_365	488.482	0.0930838	0.380915	0.621563	0.0860085	0.409533	0.587093	0.289132	0.00713075	0.0223772
MEMO1_dup1	chr2	32234733	32240733	-	chr2	32235860	32236209	229.32	MACS_peak_365	584.11	0.0665178	0.472283	0.699376	0.0688388	0.449883	0.623135	0.288344	0.00223447	0.0084868
MEMO1_dup2	chr2	32234733	32240733	-	chr2	32235860	32236209	229.32	MACS_peak_365	693.938	0.0675153	0.447854	0.678822	0.0823093	0.347517	0.527883	0.3138	0.000543196	0.00255337
MEMO1_dup3	chr2	32235121	32241121	-	chr2	32235860	32236209	229.32	MACS_peak_365	643.206	0.0768618	0.415373	0.650935	0.0987963	0.287073	0.465617	0.317873	0.000915643	0.00399988
MEMO1_dup4	chr2	32235121	32241121	-	chr2	32235860	32236209	229.32	MACS_peak_365	528.476	0.08207	0.429923	0.66282	0.0934067	0.360776	0.540651	0.294266	0.00520889	0.0171733
MEMO1_dup5	chr2	32234733	32240733	-	chr2	32235860	32236209	229.32	MACS_peak_365	649.535	0.065034	0.476731	0.702831	0.0849142	0.345181	0.525569	0.285444	0.00214424	0.00820006
MEX3A	chr1	156050789	156056789	-	chr1	156056086	156056287	63.37	MACS_peak_58	1190.01	-0.0298866	0.773785	0.892783	-0.106558	0.309651	0.490038	0.0224498	0.832063	0.903433
MFAP3L_dup1	chr4	170946581	170952581	-	chr4	170948399	170948788	232.21	MACS_peak_623	26.3602	-0.478339	0.482766	0.707392	-1.09953	0.125621	0.263646	-0.763274	0.419118	0.572569
MFAP3L_dup2	chr4	170946581	170952581	-	chr4	170948399	170948788	232.21	MACS_peak_623	30.1135	-0.390196	0.529155	0.742335	-1.51451	0.0261459	0.085752	-0.31183	0.707042	0.816558
MIR1538	chr16	69598771	69604771	-	chr16	69603710	69603855	54.22	MACS_peak_289	0.0547002	0	1	NA	0	1	NA	0	1	NA
MIR3665	chr13	78271251	78277251	-	chr13	78271708	78271902	71.27	MACS_peak_185	5.20158	0.00114232	0.998494	NA	-0.798916	0.202402	NA	1.30326	0.0560487	0.124212
MIR6125	chr12	62649140	62655140	+	chr12	62653951	62654137	124	MACS_peak_159	26.7547	0.172243	0.607075	0.795614	-0.287639	0.343202	0.523702	0.426849	0.213885	0.351055
MIR661	chr8	145018447	145024447	-	chr8	145023844	145024023	52.67	MACS_peak_829	0.120529	0	1	NA	-0.206601	0.788588	NA	0	1	NA
MIR9-1	chr1	156389221	156395221	-	chr1	156391459	156391670	75.96	MACS_peak_59	0.112039	-0.101579	0.895113	NA	0.0995583	0.897187	NA	-0.00542195	0.994385	NA
MKKS	chr20	10411573	10417573	-	chr20	10414715	10415039	407.64	MACS_peak_459	921.04	0.123294	0.212341	0.447564	0.0124993	0.899846	0.944843	-0.215399	0.0313978	0.0774285
MKKS_dup1	chr20	10413887	10419887	-	chr20	10414715	10415039	407.64	MACS_peak_459	1043.83	0.131506	0.175061	0.401081	-0.0185108	0.849395	0.913038	-0.21149	0.0313686	0.0773725
MKKS_dup2	chr20	10413887	10419887	-	chr20	10414715	10415039	407.64	MACS_peak_459	647.992	0.171348	0.147005	0.360691	-0.0128598	0.91398	0.953132	-0.226924	0.0589967	0.129175
MNT	chr17	2303258	2309258	-	chr17	2304775	2305029	132.68	MACS_peak_297	557.453	-0.243956	0.125449	0.328094	0.0582006	0.714486	0.829299	-0.59886	0.000134256	0.000760119
MTMR11	chr1	149907266	149913266	-	chr1	149911361	149911553	140.72	MACS_peak_52	481.014	-0.502342	0.00252862	0.025308	0.0299783	0.854681	0.916354	-0.330673	0.0429695	0.100155
MTMR11_dup1	chr1	149907791	149913791	-	chr1	149911361	149911553	140.72	MACS_peak_52	573.523	-0.501778	0.00290696	0.0277025	0.00536448	0.974287	0.986369	-0.335455	0.043597	0.101383
MYCBP2	chr13	77900177	77906177	-	chr13	77901250	77901488	215.64	MACS_peak_183	2299.26	-0.0121134	0.959622	0.984943	-0.534236	0.0257303	0.0847379	0.351346	0.143482	0.259078
NFATC4	chr14	24831117	24837117	+	chr14	24836119	24836256	125.34	MACS_peak_199	771.716	-0.481287	0.00890603	0.0600565	0.188776	0.305817	0.486082	-0.755495	4.00206e-05	0.000266161
NFATC4_dup1	chr14	24831117	24837117	+	chr14	24836119	24836256	125.34	MACS_peak_199	688.717	-0.512461	0.00649444	0.048197	0.151266	0.422683	0.599265	-0.738654	8.71486e-05	0.000521623
NFATC4_dup2	chr14	24831117	24837117	+	chr14	24836119	24836256	125.34	MACS_peak_199	824.518	-0.497041	0.0108956	0.0691292	0.216647	0.267782	0.445156	-0.738715	0.000153172	0.000853168
NFATC4_dup3	chr14	24832226	24838226	+	chr14	24836119	24836256	125.34	MACS_peak_199	701.345	-0.512027	0.00644278	0.0479376	0.147575	0.433235	0.608874	-0.745002	7.34479e-05	0.00045022
NFATC4_dup4	chr14	24832226	24838226	+	chr14	24836119	24836256	125.34	MACS_peak_199	783.006	-0.481191	0.00918453	0.0615084	0.184749	0.318082	0.498386	-0.75977	3.87463e-05	0.000258887
NFATC4_dup5	chr14	24833288	24839288	+	chr14	24836119	24836256	125.34	MACS_peak_199	752.146	-0.478983	0.00927581	0.0619315	0.193587	0.293917	0.473019	-0.752073	4.37438e-05	0.000287684
NFATC4_dup6	chr14	24833359	24839359	+	chr14	24836119	24836256	125.34	MACS_peak_199	806.837	-0.495382	0.0107737	0.0686476	0.22281	0.252102	0.427683	-0.736485	0.000148796	0.000831912
NFKB1	chr4	103417486	103423486	+	chr4	103419358	103419499	54.36	MACS_peak_590	1341.51	0.0224055	0.783024	0.898251	0.227142	0.00419471	0.0224287	0.469784	5.45833e-09	1.00964e-07
NFKB1_dup1	chr4	103417486	103423486	+	chr4	103419358	103419499	54.36	MACS_peak_590	1342.49	0.0237086	0.770798	0.891545	0.227509	0.00414401	0.0222574	0.469389	5.66507e-09	1.04543e-07
NFKB1_dup2	chr4	103418055	103424055	+	chr4	103419358	103419499	54.36	MACS_peak_590	1319.77	0.020556	0.802231	0.908181	0.229004	0.00421427	0.0224829	0.457827	1.73317e-08	2.85813e-07
NPAS3	chr14	33403459	33409459	+	chr14	33407560	33407796	95.14	MACS_peak_202	8.14198	-0.835842	0.0719251	NA	-0.315283	0.481738	0.651218	-0.285923	0.535351	0.680948
NPAS3_dup1	chr14	33403459	33409459	+	chr14	33407560	33407796	95.14	MACS_peak_202	8.14198	-0.835842	0.0719251	NA	-0.315283	0.481738	0.651218	-0.285923	0.535351	0.680948
NPAS3_dup2	chr14	33403459	33409459	+	chr14	33407560	33407796	95.14	MACS_peak_202	8.14198	-0.835842	0.0719251	NA	-0.315283	0.481738	0.651218	-0.285923	0.535351	0.680948
NPAS3_dup3	chr14	33403459	33409459	+	chr14	33407560	33407796	95.14	MACS_peak_202	8.17354	-0.862192	0.0631606	NA	-0.315271	0.481991	0.651468	-0.285905	0.53558	0.68113
NR2F1	chr5	92914043	92920043	+	chr5	92917306	92917478	96.98	MACS_peak_667	712.465	0.331877	0.00838597	0.0577145	0.00929133	0.940043	0.968066	-0.303865	0.0141954	0.0399896
NR2F1-AS1_dup1	chr5	92916026	92922026	-	chr5	92917306	92917478	96.98	MACS_peak_667	109.168	0.304948	0.0629805	0.216635	0.0680947	0.657537	0.789181	-0.725204	3.84844e-06	3.38512e-05
NR2F1-AS1_dup2	chr5	92916026	92922026	-	chr5	92917306	92917478	96.98	MACS_peak_667	108.003	0.299857	0.0641801	0.219113	0.0701367	0.642795	0.77876	-0.728763	2.46283e-06	2.28583e-05
NR2F1-AS1_dup3	chr5	92916026	92922026	-	chr5	92917306	92917478	96.98	MACS_peak_667	113.925	0.30058	0.0561393	0.200856	0.0876431	0.549999	0.708766	-0.707793	2.3811e-06	2.22395e-05
NR2F1-AS1_dup4	chr5	92916026	92922026	-	chr5	92917306	92917478	96.98	MACS_peak_667	90.8144	0.404429	0.0305901	0.135461	0.0351266	0.841634	0.908261	-0.799687	8.77129e-06	6.98027e-05
NR2F1-AS1_dup5	chr5	92916026	92922026	-	chr5	92917306	92917478	96.98	MACS_peak_667	108.272	0.296505	0.0715994	0.233601	0.063072	0.682245	0.806451	-0.726574	3.91454e-06	3.43495e-05
NR2F1-AS1_dup6	chr5	92916026	92922026	-	chr5	92917306	92917478	96.98	MACS_peak_667	108.504	0.304353	0.0615153	0.213321	0.0599317	0.693702	0.814465	-0.725351	3.12101e-06	2.81394e-05
NR2F1-AS1_dup7	chr5	92916026	92922026	-	chr5	92917306	92917478	96.98	MACS_peak_667	87.5792	0.387654	0.016221	0.0904295	0.243685	0.0969335	0.219364	-0.372549	0.0138358	0.0391116
NR2F1-AS1_dup8	chr5	92916026	92922026	-	chr5	92917306	92917478	96.98	MACS_peak_667	89.1077	0.395028	0.014241	0.0833664	0.240228	0.101583	0.226944	-0.378223	0.0123759	0.0355891
NR2F1-AS1_dup9	chr5	92916026	92922026	-	chr5	92917306	92917478	96.98	MACS_peak_667	100.965	0.44566	0.00263711	0.0260389	0.194247	0.145972	0.293029	-0.39203	0.00451738	0.0153075
NSD2	chr4	1868123	1874123	+	chr4	1874084	1874320	99.8	MACS_peak_546	4360.64	-0.00647408	0.945902	0.978609	-0.478785	5.47186e-07	1.4658e-05	0.0577121	0.548027	0.692341
NSUN7	chr4	40746914	40752914	+	chr4	40751799	40752014	82.64	MACS_peak_568	197.042	-0.200554	0.303733	0.546187	-0.118917	0.533338	0.694739	-0.448189	0.0186572	0.0501675
NSUN7_dup1	chr4	40746914	40752914	+	chr4	40751799	40752014	82.64	MACS_peak_568	195.044	-0.205405	0.293202	0.535953	-0.113603	0.552614	0.711069	-0.441055	0.0208748	0.0552195
OR5AS1	chr11	55792895	55798895	+	chr11	55796013	55796162	52.08	MACS_peak_109	0.0346723	0	1	NA	0.201611	0.793577	NA	0	1	NA
OSGIN1	chr16	83981827	83987827	+	chr16	83986363	83986587	198.65	MACS_peak_295	348.727	-0.1421	0.341284	0.58316	0.152572	0.299583	0.479352	-0.719926	7.24145e-07	7.91969e-06
PAXBP1	chr21	34143169	34149169	-	chr21	34144084	34144205	71.37	MACS_peak_487	975.618	0.157424	0.0433212	0.169763	-0.151143	0.055693	0.147889	0.266702	0.00113888	0.00481148
PAXBP1_dup1	chr21	34143169	34149169	-	chr21	34144084	34144205	71.37	MACS_peak_487	973.511	0.15708	0.0434947	0.170189	-0.151746	0.0544219	0.145612	0.272041	0.000890742	0.00391094
PAXBP1_dup2	chr21	34143169	34149169	-	chr21	34144084	34144205	71.37	MACS_peak_487	671.328	0.138985	0.233676	0.473048	-0.328123	0.00569559	0.0282353	0.504572	4.0935e-05	0.000271311
PCDH9	chr13	67803468	67809468	-	chr13	67804540	67804793	140.17	MACS_peak_179	10.5729	1.02905	0.0167175	0.0921457	-0.455323	0.232806	0.405077	0.916113	0.0378498	0.090397
PCDH9_dup1	chr13	67803468	67809468	-	chr13	67804540	67804793	140.17	MACS_peak_179	10.6933	1.02676	0.0165107	0.0914949	-0.470383	0.218913	0.388396	0.915847	0.0383541	0.0913546
PCDH9_dup2	chr13	67803468	67809468	-	chr13	67804540	67804793	140.17	MACS_peak_179	10.5518	1.02905	0.0167397	0.0922311	-0.443677	0.245356	0.419687	0.916113	0.0378861	0.0904656
PCDH9_dup3	chr13	67803468	67809468	-	chr13	67804540	67804793	140.17	MACS_peak_179	10.7784	1.02731	0.0156902	0.088496	-0.460578	0.223477	0.393712	0.940457	0.0320313	0.0787156
PCDH9_dup4	chr13	67803468	67809468	-	chr13	67804540	67804793	140.17	MACS_peak_179	11.2101	1.04676	0.00766725	0.0542187	-0.159702	0.645212	0.780606	0.968966	0.0160512	0.0442834
PDE8A	chr15	85518744	85524744	+	chr15	85523559	85523945	132.15	MACS_peak_264	727.783	-0.122585	0.176548	0.403185	-0.619611	8.98283e-11	6.24162e-09	-0.420085	2.63064e-05	0.000183713
PDE8A_dup1	chr15	85520205	85526205	+	chr15	85523559	85523945	132.15	MACS_peak_264	733.944	-0.111849	0.213525	0.449128	-0.626837	3.74101e-11	2.79379e-09	-0.403366	4.7687e-05	0.000309953
PDE8A_dup2	chr15	85520205	85526205	+	chr15	85523559	85523945	132.15	MACS_peak_264	757.502	-0.108463	0.232889	0.472117	-0.626861	5.76006e-11	4.12926e-09	-0.395728	7.55956e-05	0.000460934
PIGM	chr1	160000783	160006783	-	chr1	160001703	160002001	175.1	MACS_peak_62	513.552	0.232161	0.0639102	0.218546	-0.372363	0.00375195	0.0206581	0.579299	1.15985e-05	8.94126e-05
PLCH1_dup4	chr3	155461878	155467878	-	chr3	155462775	155463045	184.23	MACS_peak_532	162.785	0.106757	0.575991	0.775697	-0.68529	0.000373266	0.00332471	-0.0609009	0.758071	0.852968
PLCH1_dup5	chr3	155461878	155467878	-	chr3	155462775	155463045	184.23	MACS_peak_532	162.114	0.0992941	0.597908	0.790497	-0.676035	0.000368687	0.00329692	-0.0710915	0.715711	0.822891
PLEC_dup2	chr8	145017905	145023905	-	chr8	145023844	145024023	52.67	MACS_peak_829	35157.6	-0.17492	0.197099	0.42952	-0.818951	1.5423e-09	8.55097e-08	-0.323763	0.016956	0.0463334
PLEKHA8	chr7	30062977	30068977	+	chr7	30067827	30068044	145.17	MACS_peak_719	736.537	-0.451968	0.000682497	0.0100445	-0.237103	0.0735172	0.17937	0.00447102	0.973463	0.995918
PLEKHA8_dup1	chr7	30062977	30068977	+	chr7	30067827	30068044	145.17	MACS_peak_719	208.889	-0.266711	0.151942	0.368079	-0.463405	0.0139933	0.0547803	0.509019	0.0111014	0.0324551
PLEKHA8_dup2	chr7	30062977	30068977	+	chr7	30067827	30068044	145.17	MACS_peak_719	221.94	-0.302523	0.0874058	0.263831	-0.466464	0.00915476	0.0402699	0.476308	0.0124865	0.0358437
PLS1	chr3	142310229	142316229	+	chr3	142315075	142315348	90.65	MACS_peak_527	1501.45	-0.136115	0.218437	0.455256	-0.305998	0.00566297	0.028116	-0.157854	0.158051	0.279105
PPP6R1	chr19	55769038	55775038	-	chr19	55770518	55770935	336.85	MACS_peak_354	4515.86	0.0973238	0.160824	0.380615	-0.370849	7.88741e-08	2.7739e-06	-0.417376	1.50764e-09	3.11674e-08
PRDM15	chr21	43298591	43304591	-	chr21	43299122	43299259	57.17	MACS_peak_491	468.203	0.0301611	0.752867	0.881274	-0.129408	0.178766	0.338303	0.0920403	0.360701	0.515525
PRDM15_dup1	chr21	43298591	43304591	-	chr21	43299122	43299259	57.17	MACS_peak_491	465.62	0.027684	0.768829	0.89038	-0.13287	0.160302	0.312817	0.0941706	0.342419	0.496176
PRDM15_dup3	chr21	43298591	43304591	-	chr21	43299122	43299259	57.17	MACS_peak_491	460.733	0.0283055	0.76596	0.888582	-0.122769	0.198602	0.363736	0.085762	0.391305	0.546366
PRDM15_dup4	chr21	43298591	43304591	-	chr21	43299122	43299259	57.17	MACS_peak_491	468.918	0.0310406	0.74484	0.876677	-0.132182	0.167739	0.323288	0.0945234	0.345904	0.499756
PRDM15_dup5	chr21	43298591	43304591	-	chr21	43299122	43299259	57.17	MACS_peak_491	383.768	0.0479931	0.691987	0.848315	-0.187441	0.124345	0.261792	0.103216	0.414812	0.568428
PRDM15_dup6	chr21	43298591	43304591	-	chr21	43299122	43299259	57.17	MACS_peak_491	296.917	0.040778	0.819486	0.916682	-0.386797	0.0323749	0.100143	0.283361	0.127776	0.236982
PSMD1	chr2	231916578	231922578	+	chr2	231921230	231921363	100.06	MACS_peak_448	3028.35	0.239099	0.0406809	0.162839	-0.23562	0.0449078	0.126959	0.404437	0.000666873	0.00304747
PSMD1_dup1	chr2	231916578	231922578	+	chr2	231921230	231921363	100.06	MACS_peak_448	3134.05	0.240697	0.0408664	0.163341	-0.233541	0.0484612	0.134161	0.394995	0.000963288	0.00416987
PSMD1_dup2	chr2	231916578	231922578	+	chr2	231921230	231921363	100.06	MACS_peak_448	2986.17	0.248632	0.0381011	0.156093	-0.213812	0.0760601	0.183726	0.38664	0.00150528	0.00609682
PTEN	chr10	89618195	89624195	+	chr10	89622046	89622355	156.3	MACS_peak_103	1186.33	-0.0422832	0.732696	0.870352	-0.16693	0.179718	0.33946	-0.303156	0.0148931	0.0415687
PTEN_dup1	chr10	89618195	89624195	+	chr10	89622046	89622355	156.3	MACS_peak_103	1176.02	-0.0430607	0.728312	0.867616	-0.163293	0.189994	0.352725	-0.30059	0.0158897	0.0438988
PTEN_dup2	chr10	89618195	89624195	+	chr10	89622046	89622355	156.3	MACS_peak_103	1186.65	-0.041861	0.735126	0.871532	-0.167273	0.178568	0.338046	-0.301427	0.0154141	0.042793
PTMA	chr2	232568235	232574235	+	chr2	232571620	232571767	54.72	MACS_peak_450	30528.4	-0.261041	0.0025422	0.0254114	0.0608871	0.48152	0.651079	0.0306506	0.723352	0.828599
PTMA_dup1	chr2	232568235	232574235	+	chr2	232571620	232571767	54.72	MACS_peak_450	30429.7	-0.260686	0.00260526	0.0258571	0.0617428	0.475868	0.646347	0.0302299	0.727287	0.831127
RAD51B	chr14	68281496	68287496	+	chr14	68283332	68283532	68.23	MACS_peak_217	72.2004	0.137353	0.453496	0.683549	0.689336	0.00016299	0.00172941	0.893891	3.08692e-06	2.79056e-05
RAD51B_dup1	chr14	68281496	68287496	+	chr14	68283332	68283532	68.23	MACS_peak_217	81.7427	0.170368	0.319492	0.562347	0.61488	0.000333676	0.00304924	0.807266	7.75592e-06	6.25261e-05
RAD51B_dup2	chr14	68281496	68287496	+	chr14	68283332	68283532	68.23	MACS_peak_217	76.4712	0.107323	0.563626	0.767539	0.61267	0.000959752	0.00709707	0.893566	4.68399e-06	4.00315e-05
RAD51B_dup3	chr14	68281496	68287496	+	chr14	68283332	68283532	68.23	MACS_peak_217	79.2476	0.0749429	0.669472	0.834965	0.802942	3.30998e-06	6.8997e-05	1.13767	5.38474e-10	1.22103e-08
RAD51B_dup4	chr14	68281496	68287496	+	chr14	68283332	68283532	68.23	MACS_peak_217	77.2323	0.0718851	0.670026	0.835507	0.590911	0.000543108	0.00450659	0.846982	2.76844e-06	2.53858e-05
RAD51B_dup5	chr14	68281496	68287496	+	chr14	68283332	68283532	68.23	MACS_peak_217	77.1792	0.0720509	0.668966	0.834607	0.590913	0.000530438	0.00442551	0.846996	2.6674e-06	2.45163e-05
RAD51B_dup6	chr14	68281496	68287496	+	chr14	68283332	68283532	68.23	MACS_peak_217	74.5024	0.150365	0.412299	0.648267	0.662207	0.000325137	0.00298646	0.848277	1.07295e-05	8.34893e-05
RAD51B_dup7	chr14	68281496	68287496	+	chr14	68283332	68283532	68.23	MACS_peak_217	82.1009	0.189962	0.279813	0.521919	0.513314	0.00364705	0.0202258	0.819261	1.31355e-05	9.9764e-05
RAD51B_dup8	chr14	68281496	68287496	+	chr14	68283332	68283532	68.23	MACS_peak_217	72.8681	0.121806	0.503752	0.723329	0.696776	0.000119432	0.00135353	0.898216	2.42169e-06	2.25562e-05
RAD51B_dup9	chr14	68281540	68287540	+	chr14	68283332	68283532	68.23	MACS_peak_217	77.8763	0.0713514	0.686478	0.845816	0.80581	3.4264e-06	7.10102e-05	1.11186	1.4819e-09	3.06756e-08
RAP2A	chr13	98081475	98087475	+	chr13	98085395	98085726	225.42	MACS_peak_190	843.383	-0.128463	0.227656	0.465886	-0.917871	4.02376e-17	8.1502e-15	-0.416012	0.00014872	0.000831618
RAP2B	chr3	152875001	152881001	+	chr3	152879187	152879411	101.58	MACS_peak_531	2039.97	0.016159	0.819465	0.916682	-0.111963	0.1127	0.244516	-0.165514	0.0216147	0.0567577
RBPJ	chr4	26316332	26322332	+	chr4	26321252	26321494	302.07	MACS_peak_558	2026.08	-0.252905	0.000388863	0.00649491	-0.0616991	0.3902	0.568776	0.165496	0.0220684	0.057779
RBPJ_dup1	chr4	26316332	26322332	+	chr4	26321252	26321494	302.07	MACS_peak_558	2026.27	-0.254285	0.000335426	0.00582314	-0.0616948	0.38768	0.566545	0.165786	0.0211476	0.055782
RBPJ_dup2	chr4	26317429	26323429	+	chr4	26321252	26321494	302.07	MACS_peak_558	2042.78	-0.253926	0.00041854	0.00688346	-0.0637917	0.378799	0.558241	0.165226	0.0235603	0.0609491
RBPJ_dup3	chr4	26317429	26323429	+	chr4	26321252	26321494	302.07	MACS_peak_558	2065.56	-0.254813	0.000532117	0.00831676	-0.0631834	0.393605	0.572296	0.173394	0.0200145	0.0532807
RGS3_dup9	chr9	116338157	116344157	+	chr9	116341147	116341350	134.39	MACS_peak_851	954.904	0.0989752	0.45731	0.686827	0.0347456	0.790301	0.878462	-0.500878	0.000119436	0.000687545
RNF114	chr20	48547914	48553914	+	chr20	48552640	48552906	178.55	MACS_peak_475	2069.68	-0.260211	0.000407199	0.00673251	0.058283	0.428518	0.604799	-0.315074	1.76655e-05	0.000129831
RNF208	chr9	140114775	140120775	-	chr9	140117893	140118111	128.79	MACS_peak_860	96.2762	-0.514572	0.0159669	0.0894421	-0.0365347	0.864821	0.923168	-0.848635	5.95309e-05	0.000375726
RNF224	chr9	140117018	140123018	+	chr9	140117893	140118111	128.79	MACS_peak_860	64.3357	-0.0671356	0.773756	0.892783	-0.145205	0.515155	0.68011	0.0799284	0.720111	0.826209
RPL26	chr17	8285482	8291482	-	chr17	8286509	8286696	59.46	MACS_peak_301	10526.4	-0.106145	0.354	0.596425	0.261675	0.0223195	0.0765942	-0.381563	0.000865785	0.00381561
RPL26_dup1	chr17	8285565	8291565	-	chr17	8286509	8286696	59.46	MACS_peak_301	11729.1	-0.118608	0.293615	0.536221	0.236625	0.0361633	0.108412	-0.403747	0.000351914	0.0017642
RPL26_dup2	chr17	8285482	8291482	-	chr17	8286509	8286696	59.46	MACS_peak_301	10714.3	-0.109014	0.342929	0.585051	0.261141	0.0230989	0.0785035	-0.38025	0.000942472	0.00409739
RPL5	chr1	93292594	93298594	+	chr1	93297385	93297528	55.68	MACS_peak_42	19757.3	-0.11618	0.22638	0.464411	0.462474	1.44887e-06	3.41659e-05	-0.00172237	0.985687	1
RTBDN	chr19	12945242	12951242	-	chr19	12947092	12947417	246.8	MACS_peak_337	19.3958	-0.115017	0.706472	0.855542	0.923591	0.00325144	0.0184958	0.436152	0.158198	0.279313
RTBDN_dup1	chr19	12944390	12950390	-	chr19	12947092	12947417	246.8	MACS_peak_337	12.4873	0.0501971	0.888073	0.950719	0.918244	0.0120562	0.0491136	0.455513	0.200678	0.334327
RTBDN_dup2	chr19	12945242	12951242	-	chr19	12947092	12947417	246.8	MACS_peak_337	17.9492	-0.106368	0.73485	0.871503	0.889097	0.00583152	0.0287367	0.397865	0.210604	0.346963
RTBDN_dup5	chr19	12944390	12950390	-	chr19	12947092	12947417	246.8	MACS_peak_337	12.4605	0.0303066	0.932264	0.9728	0.918312	0.0119011	0.0486829	0.45555	0.199814	0.333239
SCAMP1	chr5	77651327	77657327	+	chr5	77655665	77655880	239.04	MACS_peak_662	862.868	-0.221375	0.148751	0.363268	-0.472722	0.00230559	0.0141942	-0.227522	0.145049	0.261219
SCAMP1_dup1	chr5	77651327	77657327	+	chr5	77655665	77655880	239.04	MACS_peak_662	838.492	-0.218203	0.149561	0.364597	-0.464556	0.00244025	0.0148423	-0.224917	0.14514	0.261352
SCAMP1_dup2	chr5	77651327	77657327	+	chr5	77655665	77655880	239.04	MACS_peak_662	884.991	-0.222357	0.155868	0.373418	-0.474319	0.0027528	0.0162664	-0.222736	0.162313	0.284697
SCAMP1-AS1	chr5	77655365	77661365	-	chr5	77655665	77655880	239.04	MACS_peak_662	68.5862	0.0166739	0.92446	0.968994	-0.285743	0.0995351	0.223508	-0.57209	0.00120504	0.00503876
SEMA3A	chr7	83823217	83829217	-	chr7	83824262	83824452	63	MACS_peak_738	669.621	0.124613	0.46852	0.695922	-0.724512	2.47764e-05	0.000377814	-0.358635	0.038621	0.0918447
SEMA6A	chr5	115909622	115915622	-	chr5	115910480	115910673	90.64	MACS_peak_677	64.1784	0.226508	0.27732	0.51991	-0.319308	0.130937	0.271373	0.123031	0.57975	0.718914
SEMA6A_dup1	chr5	115909622	115915622	-	chr5	115910480	115910673	90.64	MACS_peak_677	63.942	0.23525	0.257218	0.499472	-0.316104	0.133024	0.274427	0.142306	0.520558	0.667417
SGMS1	chr10	52382737	52388737	-	chr10	52384299	52384496	152.92	MACS_peak_101	381.518	-0.0940993	0.368717	0.610659	-0.543829	2.2005e-06	4.90842e-05	-0.234994	0.0475024	0.108748
SGMS1-AS1	chr10	52379711	52385711	+	chr10	52384299	52384496	152.92	MACS_peak_101	10.3729	0.489875	0.207868	0.442084	-0.284697	0.495024	0.662847	0.485063	0.332015	0.485324
SH3BP2_dup1	chr4	2808946	2814946	+	chr4	2813730	2814018	146.94	MACS_peak_547	3260.1	-0.534255	0.0079883	0.0557728	-0.496283	0.0138835	0.0544995	-0.74273	0.000230935	0.00122184
SHB	chr9	38068210	38074210	-	chr9	38069767	38069870	89.68	MACS_peak_835	2119.95	0.0137092	0.857179	0.935202	-0.00525618	0.944464	0.970198	-0.564539	8.13485e-14	3.81177e-12
SLAIN1	chr13	78266989	78272989	+	chr13	78271708	78271902	71.27	MACS_peak_185	294.644	0.114538	0.282355	0.524221	-0.448158	1.83849e-05	0.00029392	0.0417449	0.705227	0.815377
SLAIN1_dup1	chr13	78268016	78274016	+	chr13	78271708	78271902	71.27	MACS_peak_185	249.329	0.0339987	0.740711	0.874636	-0.42748	2.18592e-05	0.000340216	-0.122258	0.254799	0.400621
SLC2A1	chr1	43423847	43429847	-	chr1	43425030	43425179	94.15	MACS_peak_24	13579.1	-0.490593	1.95795e-08	1.54335e-06	0.172945	0.0473475	0.132006	-0.0786109	0.367214	0.522183
SLC2A1-AS1	chr1	43419720	43425720	+	chr1	43425030	43425179	94.15	MACS_peak_24	23.7792	-0.479931	0.0945232	0.276574	-0.216958	0.435212	0.610539	-0.926666	0.000717852	0.00324468
SLC39A6	chr18	33708357	33714357	-	chr18	33709298	33709452	62.37	MACS_peak_328	924.126	0.173878	0.00524101	0.0416653	-0.172593	0.0090259	0.0398418	0.203915	0.0027957	0.0102424
SLC39A6_dup1	chr18	33708357	33714357	-	chr18	33709298	33709452	62.37	MACS_peak_328	430.506	0.187174	0.0357764	0.150091	-0.219495	0.0209541	0.0731789	0.285246	0.00395534	0.0136939
SLITRK3	chr3	164913640	164919640	-	chr3	164914591	164914770	121.84	MACS_peak_537	2.04904	0.670367	0.555271	NA	-0.760941	0.518715	NA	2.4494	0.042874	0.0999731
SLITRK3_dup1	chr3	164913897	164919897	-	chr3	164914591	164914770	121.84	MACS_peak_537	2.03171	0.674459	0.549669	NA	-0.93324	0.427752	NA	2.47311	0.0402664	0.0949931
SLITRK3_dup2	chr3	164912790	164918790	-	chr3	164914591	164914770	121.84	MACS_peak_537	2.08699	0.757309	0.492435	NA	-0.945635	0.415363	NA	2.51798	0.0352199	0.0852874
SLX4IP	chr20	10410951	10416951	+	chr20	10414715	10415039	407.64	MACS_peak_459	372.935	-0.34387	0.00954403	0.0631282	0.339756	0.0103083	0.0439091	0.699676	1.29919e-07	1.72929e-06
SMARCD2	chr17	61915088	61921088	-	chr17	61919986	61920365	812.03	MACS_peak_317	3206.32	0.0316987	0.596133	0.789312	0.0379537	0.525561	0.688262	-0.24854	3.33328e-05	0.000226461
SMARCD2_dup1	chr17	61918826	61924826	-	chr17	61919986	61920365	812.03	MACS_peak_317	3212.34	0.0336883	0.573896	0.774371	0.0373223	0.533145	0.694656	-0.246411	4.0016e-05	0.000266161
SMARCD2_dup2	chr17	61919351	61925351	-	chr17	61919986	61920365	812.03	MACS_peak_317	3422.81	0.0223697	0.709576	0.857057	0.0180885	0.763224	0.860358	-0.240293	6.45114e-05	0.000402485
SNX16	chr8	82753521	82759521	-	chr8	82754611	82754954	546.45	MACS_peak_786	272.842	-0.0362345	0.811695	0.912735	-0.143087	0.336878	0.517507	-0.0176042	0.908111	0.956243
SNX16_dup1	chr8	82753521	82759521	-	chr8	82754611	82754954	546.45	MACS_peak_786	278.142	-0.0441269	0.772119	0.892043	-0.148666	0.319342	0.499758	-0.0308575	0.839834	0.908637
SNX16_dup2	chr8	82753521	82759521	-	chr8	82754611	82754954	546.45	MACS_peak_786	282.173	-0.0253811	0.868522	0.940532	-0.157517	0.295224	0.474501	-0.0265956	0.862687	0.92456
SNX16_dup3	chr8	82753521	82759521	-	chr8	82754611	82754954	546.45	MACS_peak_786	273.128	-0.0103222	0.945957	0.978609	-0.149976	0.314881	0.495335	-0.0550667	0.718423	0.824966
SNX16_dup4	chr8	82753521	82759521	-	chr8	82754611	82754954	546.45	MACS_peak_786	269.253	-0.0611868	0.691164	0.847987	-0.149445	0.322038	0.502519	-0.0518181	0.737252	0.837932
SNX16_dup5	chr8	82753521	82759521	-	chr8	82754611	82754954	546.45	MACS_peak_786	263.107	-0.0515096	0.737977	0.873304	-0.143933	0.340132	0.521009	-0.0385481	0.803066	0.883962
SNX16_dup6	chr8	82753521	82759521	-	chr8	82754611	82754954	546.45	MACS_peak_786	273.15	-0.0367127	0.812501	0.913212	-0.157212	0.300775	0.480544	-0.0469962	0.762271	0.855848
SNX16_dup7	chr8	82753521	82759521	-	chr8	82754611	82754954	546.45	MACS_peak_786	267.146	-0.0284853	0.854048	0.933537	-0.150784	0.321322	0.501851	-0.0356276	0.818906	0.89451
SPRED2_dup1	chr2	65658656	65664656	-	chr2	65659720	65660009	162.42	MACS_peak_381	1453.04	-0.0291509	0.800262	0.90708	-0.30976	0.00734359	0.0341982	-0.0709659	0.541704	0.686665
SSBP2	chr5	81046072	81052072	-	chr5	81047214	81047377	81.28	MACS_peak_664	248.487	0.11948	0.495051	0.716675	-0.085172	0.634772	0.772723	-0.397121	0.0254424	0.0649299
SSBP2_dup1	chr5	81046072	81052072	-	chr5	81047214	81047377	81.28	MACS_peak_664	243.226	0.114024	0.513199	0.730944	-0.100784	0.572887	0.727179	-0.407237	0.0214559	0.0564316
SSBP2_dup2	chr5	81046072	81052072	-	chr5	81047214	81047377	81.28	MACS_peak_664	232.351	0.11629	0.511895	0.729947	-0.100975	0.578341	0.731244	-0.4122	0.0220611	0.0577636
SSBP2_dup3	chr5	81046072	81052072	-	chr5	81047214	81047377	81.28	MACS_peak_664	232.233	0.114723	0.517394	0.733585	-0.0979339	0.589682	0.739271	-0.412203	0.0219953	0.0576195
SSBP2_dup4	chr5	81046072	81052072	-	chr5	81047214	81047377	81.28	MACS_peak_664	217.745	0.121721	0.494169	0.715906	-0.100348	0.582848	0.734392	-0.417143	0.02114	0.0557715
SSBP2_dup5	chr5	81046072	81052072	-	chr5	81047214	81047377	81.28	MACS_peak_664	233.88	0.124754	0.479058	0.704672	-0.0871818	0.629466	0.768878	-0.402605	0.0244915	0.0628949
SSBP2_dup6	chr5	81046072	81052072	-	chr5	81047214	81047377	81.28	MACS_peak_664	248.345	0.118033	0.501419	0.721538	-0.0838607	0.640837	0.777349	-0.399572	0.0249229	0.0638247
STX6	chr1	180991257	180997257	-	chr1	180992233	180992465	84.03	MACS_peak_76	1687.62	-0.231188	0.000319858	0.00560635	0.287714	4.38133e-06	8.75879e-05	0.202625	0.00126585	0.00525812
STX6_dup1	chr1	180991257	180997257	-	chr1	180992233	180992465	84.03	MACS_peak_76	1534.41	-0.231567	0.000112712	0.0024843	0.317918	4.14931e-08	1.56021e-06	0.187317	0.00127973	0.00530515
SUZ12P1	chr17	29031626	29037626	+	chr17	29034781	29034929	63.91	MACS_peak_306	101.231	-0.00269865	0.986928	0.999298	0.104212	0.540625	0.701296	-0.525081	0.00335591	0.011926
SUZ12P1_dup1	chr17	29031626	29037626	+	chr17	29034781	29034929	63.91	MACS_peak_306	111.264	-0.00787162	0.95996	0.985058	0.210571	0.198677	0.363827	-0.554845	0.00120408	0.00503557
SUZ12P1_dup2	chr17	29031626	29037626	+	chr17	29034781	29034929	63.91	MACS_peak_306	226.343	0.0513008	0.661991	0.829839	0.101946	0.406523	0.584297	-0.0835619	0.511169	0.659127
SUZ12P1_dup3	chr17	29031626	29037626	+	chr17	29034781	29034929	63.91	MACS_peak_306	239.932	0.0618871	0.58802	0.784057	0.0850479	0.476236	0.646703	-0.107844	0.383468	0.538381
SYT5	chr19	55689811	55695811	-	chr19	55689955	55690130	57.46	MACS_peak_351	18.8185	-0.257109	0.550447	0.757676	0.0232434	0.953695	0.974807	-0.754539	0.0434018	0.100974
SYT7	chr11	61347344	61353344	-	chr11	61348872	61349195	608.48	MACS_peak_113	880.99	-0.252839	0.206535	0.44072	-0.202808	0.314791	0.495271	-0.792519	8.20143e-05	0.000494537
SYT7_dup1	chr11	61347344	61353344	-	chr11	61348872	61349195	608.48	MACS_peak_113	871.765	-0.259391	0.194839	0.426661	-0.195753	0.331751	0.512123	-0.794362	7.84417e-05	0.000476384
SYT7_dup2	chr11	61347344	61353344	-	chr11	61348872	61349195	608.48	MACS_peak_113	878.995	-0.255203	0.201763	0.435151	-0.200525	0.319686	0.500074	-0.79535	7.57814e-05	0.000461948
SYTL1	chr1	27663483	27669483	+	chr1	27668322	27668614	252.3	MACS_peak_16	848.699	-0.330482	0.0469117	0.178828	-0.213791	0.196057	0.360319	-1.39368	2.8057e-17	2.51233e-15
SYTL1_dup1	chr1	27663483	27669483	+	chr1	27668322	27668614	252.3	MACS_peak_16	862.788	-0.331175	0.0468678	0.178759	-0.220698	0.182896	0.343769	-1.38725	4.55397e-17	3.97246e-15
TJP3_dup1	chr19	3716697	3722697	+	chr19	3721436	3721711	379.36	MACS_peak_332	783.4	-0.432291	0.00964646	0.0635265	-0.229566	0.176844	0.335625	-1.31396	6.68341e-15	3.80705e-13
TLE3	chr15	70389256	70395256	-	chr15	70393957	70394423	349.65	MACS_peak_257	2236.87	-0.298504	0.00117535	0.0148896	-0.273139	0.00299868	0.0173633	-0.213454	0.0201082	0.0534849
TLE3_dup1	chr15	70389256	70395256	-	chr15	70393957	70394423	349.65	MACS_peak_257	2234.04	-0.298454	0.00116391	0.014821	-0.272473	0.00304038	0.017563	-0.213492	0.0199585	0.0531437
TLE3_dup2	chr15	70389256	70395256	-	chr15	70393957	70394423	349.65	MACS_peak_257	2229.22	-0.299448	0.00113615	0.0145828	-0.270053	0.00334855	0.0189098	-0.212717	0.020563	0.0545292
TLE3_dup3	chr15	70388091	70394091	-	chr15	70393957	70394423	349.65	MACS_peak_257	1902.02	-0.288664	0.000397765	0.00660931	-0.226517	0.00543475	0.0272378	-0.248084	0.00224303	0.00851042
TLE3_dup4	chr15	70389256	70395256	-	chr15	70393957	70394423	349.65	MACS_peak_257	2255.64	-0.297345	0.00124975	0.0155268	-0.271736	0.00319757	0.0182565	-0.213556	0.0202494	0.0538182
TLE3_dup6	chr15	70389256	70395256	-	chr15	70393957	70394423	349.65	MACS_peak_257	2238.59	-0.298998	0.00113679	0.0145854	-0.272162	0.00306643	0.0176912	-0.213481	0.0199346	0.0530919
TM9SF2	chr13	100148628	100154628	+	chr13	100150941	100151173	130.91	MACS_peak_191	5491.01	-0.0283593	0.653218	0.825167	-0.134724	0.0329766	0.101443	-0.0379574	0.547652	0.692027
TRAPPC9	chr8	141466861	141472861	-	chr8	141467795	141468009	320.02	MACS_peak_819	799.616	-0.0622514	0.542963	0.7524	-0.547313	1.28012e-07	4.24477e-06	-0.883381	2.33457e-17	2.13907e-15
TRAPPC9_dup1	chr8	141466861	141472861	-	chr8	141467795	141468009	320.02	MACS_peak_819	791.894	-0.0651543	0.52343	0.738287	-0.548543	1.13114e-07	3.80959e-06	-0.890013	1.16001e-17	1.09689e-15
TRAPPC9_dup2	chr8	141467678	141473678	-	chr8	141467795	141468009	320.02	MACS_peak_819	778.144	-0.0616057	0.540713	0.750973	-0.542488	1.06025e-07	3.58206e-06	-0.889738	4.41591e-18	4.45159e-16
TRIM46	chr1	155141263	155147263	+	chr1	155145738	155145875	52.18	MACS_peak_56	185.301	-0.118215	0.410373	0.646702	0.15493	0.279316	0.457214	0.062432	0.665919	0.78739
TRIM46_dup1	chr1	155141263	155147263	+	chr1	155145738	155145875	52.18	MACS_peak_56	171.569	-0.133438	0.368892	0.610774	0.178895	0.22642	0.397278	0.0363682	0.807468	0.886769
TRIM46_dup2	chr1	155141263	155147263	+	chr1	155145738	155145875	52.18	MACS_peak_56	178.479	-0.11259	0.431023	0.663819	0.189681	0.183282	0.344288	0.0556825	0.698809	0.810685
TRIM46_dup3	chr1	155141263	155147263	+	chr1	155145738	155145875	52.18	MACS_peak_56	184.155	-0.116089	0.417835	0.652962	0.162231	0.256213	0.432539	0.0527106	0.714943	0.822299
TRIM46_dup4	chr1	155141263	155147263	+	chr1	155145738	155145875	52.18	MACS_peak_56	184.092	-0.116084	0.416886	0.652208	0.163757	0.250802	0.426119	0.0543249	0.706055	0.815916
TRIM46_dup5	chr1	155141263	155147263	+	chr1	155145738	155145875	52.18	MACS_peak_56	97.0534	-0.0932679	0.595161	0.788585	0.0652525	0.709101	0.825688	0.262796	0.146215	0.262788
TRIM46_dup6	chr1	155141263	155147263	+	chr1	155145738	155145875	52.18	MACS_peak_56	98.3357	-0.0921935	0.603086	0.793324	0.0483554	0.78444	0.874767	0.274008	0.13333	0.244913
TRIM46_dup7	chr1	155142230	155148230	+	chr1	155145738	155145875	52.18	MACS_peak_56	182.209	-0.125217	0.397655	0.635917	0.161268	0.27466	0.45223	0.0575103	0.6994	0.811124
TRIM46_dup8	chr1	155142230	155148230	+	chr1	155145738	155145875	52.18	MACS_peak_56	180.109	-0.126524	0.388638	0.628657	0.169745	0.246034	0.420459	0.0451301	0.759881	0.854148
TRNAU1AP	chr1	28874529	28880529	+	chr1	28879301	28879585	286.54	MACS_peak_19	379.266	-0.0892512	0.436071	0.66854	0.269799	0.0162544	0.0611082	-0.164836	0.147453	0.264443
TRNAU1AP_dup1	chr1	28874529	28880529	+	chr1	28879301	28879585	286.54	MACS_peak_19	363.062	-0.0706931	0.544576	0.753666	0.315367	0.00572479	0.028318	-0.154064	0.183124	0.311998
UBC	chr12	125398587	125404587	-	chr12	125401705	125401961	188.95	MACS_peak_171	22238.9	-0.161147	0.0320542	0.139669	0.232971	0.00189726	0.0121931	-0.00733748	0.922017	0.965558
USP15	chr12	62649121	62655121	+	chr12	62653951	62654137	124	MACS_peak_159	1102.31	0.240539	0.000695075	0.0101624	-0.0530617	0.435514	0.610757	0.0848467	0.225174	0.364727
USP15_dup1	chr12	62649121	62655121	+	chr12	62653951	62654137	124	MACS_peak_159	1080.3	0.246923	0.000536785	0.00837284	-0.0445028	0.515143	0.68011	0.0754903	0.282938	0.432983
USP15_dup2	chr12	62649121	62655121	+	chr12	62653951	62654137	124	MACS_peak_159	272.286	0.154277	0.368507	0.610454	-0.302459	0.0724832	0.177518	0.517725	0.00292958	0.0106495
USP3	chr15	63791710	63797710	+	chr15	63795474	63795767	226.19	MACS_peak_250	1094.27	-0.246903	0.000957327	0.0128801	-0.0329042	0.656579	0.788538	-0.460967	6.84665e-10	1.51546e-08
USP3_dup1	chr15	63791710	63797710	+	chr15	63795474	63795767	226.19	MACS_peak_250	1029.4	-0.252712	0.00105129	0.0137594	-0.0070483	0.926364	0.960905	-0.465512	1.45612e-09	3.0208e-08
USP3_dup2	chr15	63791710	63797710	+	chr15	63795474	63795767	226.19	MACS_peak_250	1102.25	-0.250998	0.000794293	0.0111763	-0.0293634	0.691807	0.813213	-0.462216	6.35539e-10	1.41734e-08
USP3_dup3	chr15	63791710	63797710	+	chr15	63795474	63795767	226.19	MACS_peak_250	1093.14	-0.249366	0.000885194	0.0121239	-0.0332543	0.654249	0.786905	-0.459498	8.77517e-10	1.89357e-08
VSTM2A	chr7	54605018	54611018	+	chr7	54607429	54607561	55.09	MACS_peak_727	0.116175	0	1	NA	0.293073	0.703697	NA	0	1	NA
VSTM2A_dup1	chr7	54605018	54611018	+	chr7	54607429	54607561	55.09	MACS_peak_727	0.142334	0	1	NA	0.281501	0.714907	NA	0	1	NA
VSTM2A_dup2	chr7	54605018	54611018	+	chr7	54607429	54607561	55.09	MACS_peak_727	0.165185	0	1	NA	0.270244	0.725869	NA	0	1	NA
WDR70	chr5	37374362	37380362	+	chr5	37379227	37379468	165.25	MACS_peak_649	633.648	0.0581227	0.409673	0.646238	0.0626414	0.374473	0.554128	-0.0187757	0.795011	0.878537
WDR70_dup1	chr5	37374362	37380362	+	chr5	37379227	37379468	165.25	MACS_peak_649	619.974	0.0631861	0.384722	0.625429	0.0632612	0.384318	0.563433	-0.0221576	0.765955	0.858528
WDR70_dup2	chr5	37374362	37380362	+	chr5	37379227	37379468	165.25	MACS_peak_649	635.922	0.0586702	0.408987	0.64552	0.0654068	0.357549	0.537324	-0.0234286	0.74752	0.845786
WWOX	chr16	78128310	78134310	+	chr16	78133173	78133690	430.39	MACS_peak_293	191.197	0.120666	0.35522	0.597785	-0.511012	0.0016894	0.0111043	-0.870845	3.33689e-06	2.98232e-05
WWOX_dup1	chr16	78128310	78134310	+	chr16	78133173	78133690	430.39	MACS_peak_293	45.1934	0.192785	0.374191	0.615746	0.351669	0.165292	0.320197	-0.103006	0.731056	0.833822
WWOX_dup2	chr16	78128310	78134310	+	chr16	78133173	78133690	430.39	MACS_peak_293	181.346	0.119366	0.364467	0.606422	-0.487803	0.00313872	0.0180211	-0.899532	2.45614e-06	2.28141e-05
WWOX_dup3	chr16	78128310	78134310	+	chr16	78133173	78133690	430.39	MACS_peak_293	103.747	0.188246	0.216653	0.452686	-0.108652	0.563922	0.720524	-0.219525	0.313159	0.466135
WWOX_dup4	chr16	78128310	78134310	+	chr16	78133173	78133690	430.39	MACS_peak_293	101.718	0.202024	0.190466	0.42174	-0.188072	0.327144	0.507621	-0.238437	0.280451	0.43032
WWP1	chr8	87349994	87355994	+	chr8	87354285	87354433	53.23	MACS_peak_791	1751.74	0.133516	0.199478	0.43193	-0.0577349	0.579659	0.732071	0.125262	0.232177	0.373295
ZBTB20	chr3	114818174	114824174	-	chr3	114819148	114819295	52.15	MACS_peak_517	189.24	-0.207422	0.492688	0.714839	-0.855496	0.00499471	0.0255392	-0.632182	0.0390239	0.0926304
ZBTB20_dup2	chr3	114818174	114824174	-	chr3	114819148	114819295	52.15	MACS_peak_517	189.752	-0.210392	0.487105	0.710663	-0.854017	0.00512757	0.0260363	-0.631708	0.0394099	0.0933264
ZBTB41	chr1	197168672	197174672	-	chr1	197170561	197170776	78.38	MACS_peak_87	575.019	-0.233555	0.26383	0.506322	-0.360918	0.0846472	0.198712	-0.169431	0.419625	0.57308
ZBTB41_dup1	chr1	197168672	197174672	-	chr1	197170561	197170776	78.38	MACS_peak_87	574.216	-0.235751	0.258993	0.501267	-0.362533	0.0830178	0.196066	-0.170291	0.416886	0.570278
ZBTB7B	chr1	154970106	154976106	+	chr1	154973179	154973689	343.21	MACS_peak_55	1896.99	-0.0890277	0.275514	0.518124	-0.208981	0.0102536	0.0437391	-0.25637	0.00153045	0.00618711
ZBTB7B_dup1	chr1	154970106	154976106	+	chr1	154973179	154973689	343.21	MACS_peak_55	1877.61	-0.0886135	0.277888	0.520413	-0.206096	0.011375	0.0470551	-0.257293	0.00147494	0.0059893
ZBTB7B_dup2	chr1	154970106	154976106	+	chr1	154973179	154973689	343.21	MACS_peak_55	1870.9	-0.0873122	0.279693	0.521898	-0.203949	0.0112984	0.0468162	-0.257634	0.00127956	0.00530515
ZBTB7B_dup3	chr1	154970106	154976106	+	chr1	154973179	154973689	343.21	MACS_peak_55	1861.46	-0.0897778	0.26577	0.508296	-0.203078	0.0115504	0.0476244	-0.259103	0.00118278	0.00496455
ZBTB7B_dup4	chr1	154970106	154976106	+	chr1	154973179	154973689	343.21	MACS_peak_55	1856.52	-0.0887617	0.273285	0.515798	-0.201724	0.0124946	0.0503785	-0.25902	0.00124735	0.00519378
ZCCHC14	chr16	87524460	87530460	-	chr16	87526738	87526951	125.23	MACS_peak_296	1070.11	0.253528	0.0257094	0.121771	-0.163207	0.159104	0.31093	0.329868	0.00493193	0.0164298
ZCCHC6	chr9	88968402	88974402	-	chr9	88969225	88969486	153.78	MACS_peak_842	770.021	-0.406437	0.0175292	0.0950813	-0.464406	0.00696433	0.0328272	-0.265448	0.124054	0.23158
ZCCHC6_dup1	chr9	88968402	88974402	-	chr9	88969225	88969486	153.78	MACS_peak_842	885.478	-0.39389	0.0271672	0.125773	-0.476558	0.00780981	0.0357871	-0.242611	0.176662	0.303613
ZCCHC6_dup2	chr9	88968402	88974402	-	chr9	88969225	88969486	153.78	MACS_peak_842	868.512	-0.396896	0.023704	0.115528	-0.467538	0.00800775	0.0365226	-0.24463	0.166346	0.290107
ZCCHC6_dup3	chr9	88968365	88974365	-	chr9	88969225	88969486	153.78	MACS_peak_842	882.17	-0.396068	0.025894	0.122258	-0.477298	0.00753935	0.034879	-0.247866	0.166261	0.290008
ZFYVE26	chr14	68282306	68288306	-	chr14	68283332	68283532	68.23	MACS_peak_217	1182.37	0.113423	0.323899	0.566277	0.169835	0.144075	0.29036	0.923238	6.18519e-15	3.5446e-13
ZMYM3	chrX	70473038	70479038	-	chrX	70474109	70474217	94.41	MACS_peak_874	2064.7	-0.00679574	0.947107	0.97937	-0.124941	0.223936	0.39416	0.0765705	0.457326	0.608485
ZMYM3_dup1	chrX	70473499	70479499	-	chrX	70474109	70474217	94.41	MACS_peak_874	2039.22	-0.00138809	0.98912	1	-0.118361	0.246315	0.420708	0.0804348	0.432051	0.584947
ZMYM3_dup2	chrX	70474047	70480047	-	chrX	70474109	70474217	94.41	MACS_peak_874	2044.04	-0.00031861	0.997515	1	-0.118559	0.247807	0.422466	0.0832692	0.41826	0.571661
ZMYM3_dup3	chrX	70473499	70479499	-	chrX	70474109	70474217	94.41	MACS_peak_874	592.56	0.00518562	0.969204	0.990019	-0.32987	0.014917	0.0573571	0.245059	0.0736703	0.153873
ZNF212	chr7	148931742	148937742	+	chr7	148936595	148936742	54.72	MACS_peak_748	436.269	-0.0762413	0.473523	0.700296	0.162225	0.12016	0.255575	-0.239897	0.0207298	0.0549005
ZNF280D	chr15	57025284	57031284	-	chr15	57025736	57025912	71.29	MACS_peak_242	488.295	-0.115563	0.397305	0.635675	-0.0273137	0.840446	0.907708	0.176601	0.197302	0.329935
ZNF280D_dup1	chr15	57025284	57031284	-	chr15	57025736	57025912	71.29	MACS_peak_242	496.946	-0.107423	0.433176	0.665676	-0.0276977	0.83888	0.907009	0.180439	0.18949	0.320052
ZNF280D_dup2	chr15	57025284	57031284	-	chr15	57025736	57025912	71.29	MACS_peak_242	500.935	-0.10943	0.427594	0.660832	-0.0328442	0.81071	0.889918	0.185743	0.179609	0.307444
ZNF280D_dup3	chr15	57025284	57031284	-	chr15	57025736	57025912	71.29	MACS_peak_242	211.142	0.0764196	0.60297	0.793246	0.306565	0.0388666	0.114446	0.999915	1.218e-10	3.20812e-09
ZNF280D_dup4	chr15	57025284	57031284	-	chr15	57025736	57025912	71.29	MACS_peak_242	211.771	0.0743348	0.611572	0.798191	0.304487	0.0394041	0.115574	0.999943	1.04826e-10	2.79687e-09
ZNF34	chr8	146011730	146017730	-	chr8	146012873	146013011	55.94	MACS_peak_831	96.4527	0.0357443	0.811757	0.912735	0.159241	0.293532	0.472663	0.088201	0.555314	0.699063
ZNF34_dup1	chr8	146011730	146017730	-	chr8	146012873	146013011	55.94	MACS_peak_831	89.5671	0.0338374	0.826595	0.920061	0.141857	0.362558	0.542272	0.0802686	0.599016	0.734825
ZNF34_dup2	chr8	146011730	146017730	-	chr8	146012873	146013011	55.94	MACS_peak_831	96.8399	0.0317693	0.832308	0.923056	0.163703	0.280392	0.458286	0.0794828	0.594593	0.731086
ZNF462	chr9	109620378	109626378	+	chr9	109625242	109625368	69.12	MACS_peak_849	961.241	0.0800888	0.65973	0.828703	-0.176812	0.332381	0.512893	0.746605	4.76537e-05	0.000309779
ZNF462_dup1	chr9	109620378	109626378	+	chr9	109625242	109625368	69.12	MACS_peak_849	675.194	0.0621439	0.705356	0.854977	-0.113575	0.491569	0.65979	0.665659	6.70433e-05	0.000415758
ZNF792	chr19	35453953	35459953	-	chr19	35456444	35456575	58.74	MACS_peak_345	187.535	0.0464119	0.765264	0.888233	-0.0191309	0.904462	0.947662	0.20515	0.218572	0.356896
ZNF827	chr4	146859112	146865112	-	chr4	146859948	146860177	95.8	MACS_peak_612	608.981	-0.0363989	0.808572	0.911505	-0.432851	0.00410322	0.0221019	0.329372	0.0306204	0.0758833
ZNF827_dup1	chr4	146859112	146865112	-	chr4	146859948	146860177	95.8	MACS_peak_612	607.266	-0.033541	0.823141	0.918569	-0.431454	0.00417664	0.0223739	0.327287	0.0314708	0.0775761
ZNRF3-AS1	chr22	29426464	29432464	-	chr22	29426782	29427067	146.07	MACS_peak_493	2.53134	0.534097	0.489105	NA	1.2301	0.0967696	NA	0.345769	0.65075	0.774885
									PSMD1_dup2					100.06	MACS_peak_448
									NDUFA10_dup3					52.32	MACS_peak_455
									BAZ2B_dup2					61.39	MACS_peak_424
									KANSL3_dup9					422.7	MACS_peak_398
									TSGA10					56.08	MACS_peak_402
									XIRP2_dup1					53.8	MACS_peak_428
									KANSL3_dup5					422.7	MACS_peak_398
									MIR3681HG_dup1					52.32	MACS_peak_360
									XIRP2_dup2					53.8	MACS_peak_428
									TSGA10_dup2					56.08	MACS_peak_402
									DPP10_dup2					54.72	MACS_peak_407
									TMEM127_dup1					699.91	MACS_peak_397
									ITGB1BP1_dup10					54.43	MACS_peak_358
									DPP10_dup12					56.82	MACS_peak_408
									ITGB1BP1_dup6					54.43	MACS_peak_358
									CCDC85A_dup5					52.08	MACS_peak_376
									KANSL3_dup4					422.7	MACS_peak_398
									KANSL3_dup13					422.7	MACS_peak_398
									TSGA10_dup3					56.08	MACS_peak_402
									NBEAL1					73.34	MACS_peak_439
									DPP10_dup9					56.82	MACS_peak_408
									KANSL3					422.7	MACS_peak_398
									CTNNA2_dup3					54.11	MACS_peak_389
									CCDC85A_dup1					52.08	MACS_peak_376
									ZRANB3_dup1					55.27	MACS_peak_414
									KANSL3_dup3					422.7	MACS_peak_398
									TMEM127					699.91	MACS_peak_397
									ITGB1BP1_dup3					54.43	MACS_peak_358
									MEMO1_dup5					229.32	MACS_peak_365
									LINC01122					57.45	MACS_peak_379
									CPSF3					54.43	MACS_peak_358
									UNC80_dup1					70.39	MACS_peak_441
									ITGB1BP1_dup8					54.43	MACS_peak_358
									SLC4A10_dup2					50.35	MACS_peak_426
									ITGB1BP1					54.43	MACS_peak_358
									PTMA					54.72	MACS_peak_450
									CCDC85A_dup2					52.08	MACS_peak_376
									ZRANB3_dup2					55.27	MACS_peak_414
									ITGB1BP1_dup5					54.43	MACS_peak_358
									TSGA10_dup1					56.08	MACS_peak_402
									NPHP1_dup2					57.79	MACS_peak_404
									E2F6_dup1					572.07	MACS_peak_359
									KANSL3_dup14					422.7	MACS_peak_398
									PSMD1_dup1					100.06	MACS_peak_448
									LOC101060091					115.34	MACS_peak_406
									CDC42EP3_dup1					107.69	MACS_peak_368
									ZRANB3					55.27	MACS_peak_414
									DPP10_dup8					56.82	MACS_peak_408
									KANSL3_dup11					422.7	MACS_peak_398
									ITGB1BP1_dup1					54.43	MACS_peak_358
									E2F6_dup2					572.07	MACS_peak_359
									ANKRD20A8P					64.94	MACS_peak_395
									NDUFA10_dup2					52.32	MACS_peak_455
									PTPN4					52.67	MACS_peak_410
									MEMO1_dup4					229.32	MACS_peak_365
									DPP10_dup6					54.72	MACS_peak_407
									DPP10_dup4					54.72	MACS_peak_407
									CTNNA2					54.11	MACS_peak_389
									E2F6_dup4					572.07	MACS_peak_359
									UNC80					70.39	MACS_peak_441
									CPSF3_dup1					54.43	MACS_peak_358
									KANSL3_dup17					422.7	MACS_peak_398
									CTNNA2_dup1					54.11	MACS_peak_389
									NDUFA10_dup1					52.32	MACS_peak_455
									FER1L5					422.7	MACS_peak_398
									DPP10					54.72	MACS_peak_407
									CCDC141					50.28	MACS_peak_431
									TSGA10_dup4					56.08	MACS_peak_402
									KANSL3_dup8					422.7	MACS_peak_398
									BAZ2B_dup3					61.39	MACS_peak_424
									PSMD1					100.06	MACS_peak_448
									CTNNA2_dup2					54.11	MACS_peak_389
									DPP10_dup11					56.82	MACS_peak_408
									KANSL3_dup1					422.7	MACS_peak_398
									MEMO1_dup2					229.32	MACS_peak_365
									KANSL3_dup2					422.7	MACS_peak_398
									DPP10_dup3					54.72	MACS_peak_407
									NPHP1_dup1					57.79	MACS_peak_404
									NCKAP5_dup1					56.87	MACS_peak_413
									INSR_dup1					102.06	MACS_peak_336
									FGF21					274.41	MACS_peak_350
									PTPRH					57.46	MACS_peak_351
									ADGRL1					191.95	MACS_peak_338
									RTBDN_dup2					246.8	MACS_peak_337
									EML2_dup3					170.52	MACS_peak_349
									LSR					170.32	MACS_peak_346
									HSPBP1					336.85	MACS_peak_354
									TJP3					379.36	MACS_peak_332
									INSR					102.06	MACS_peak_336
									LSR_dup3					170.32	MACS_peak_346
									SYT5					57.46	MACS_peak_351
									ZNF568_dup4					54.49	MACS_peak_348
									EML2_dup1					170.52	MACS_peak_349
									ADGRL1_dup1					191.95	MACS_peak_338
									HSPBP1_dup1					336.85	MACS_peak_354
									LSR_dup4					170.32	MACS_peak_346
									EML2-AS1					170.52	MACS_peak_349
									ZNF568_dup5					54.49	MACS_peak_348
									MAST1					246.8	MACS_peak_337
									RTBDN_dup1					246.8	MACS_peak_337
									FUT1_dup1					274.41	MACS_peak_350
									PTPRH_dup1					57.46	MACS_peak_351
									EML2-AS1_dup1					170.52	MACS_peak_349
									LSR_dup2					170.32	MACS_peak_346
									NOTCH3					109.32	MACS_peak_341
									RTBDN_dup5					246.8	MACS_peak_337
									FUT1					274.41	MACS_peak_350
									LINC01775					112.95	MACS_peak_331
									ZNF792					58.74	MACS_peak_345
									RTBDN					246.8	MACS_peak_337
									LSR_dup1					170.32	MACS_peak_346
									HSPBP1_dup2					336.85	MACS_peak_354
									SYT5_dup1					57.46	MACS_peak_351
									TJP3_dup1					379.36	MACS_peak_332
									PPP6R1					336.85	MACS_peak_354
									ELP2_dup5					62.37	MACS_peak_328
									ELP2_dup12					62.37	MACS_peak_328
									ELP2_dup13					62.37	MACS_peak_328
									INO80C_dup2					186.29	MACS_peak_327
									ANKRD30B					53.19	MACS_peak_326
									SLC39A6					62.37	MACS_peak_328
									ELP2_dup8					62.37	MACS_peak_328
									ELP2_dup2					62.37	MACS_peak_328
									INO80C_dup1					186.29	MACS_peak_327
									ELP2					62.37	MACS_peak_328
									ELP2_dup4					62.37	MACS_peak_328
									ELP2_dup9					62.37	MACS_peak_328
									ELP2_dup10					62.37	MACS_peak_328
									INO80C					186.29	MACS_peak_327
									SLC39A6_dup1					62.37	MACS_peak_328
									KDSR					433.22	MACS_peak_330
									ELP2_dup7					62.37	MACS_peak_328
									ELP2_dup11					62.37	MACS_peak_328
									ELP2_dup6					62.37	MACS_peak_328
									ELP2_dup1					62.37	MACS_peak_328
									ELP2_dup3					62.37	MACS_peak_328
									SMARCD2					812.03	MACS_peak_317
									DNAH17					86.78	MACS_peak_320
									KDM6B_dup1					333.74	MACS_peak_300
									SUZ12P1_dup3					63.91	MACS_peak_306
									RPTOR_dup1					56.12	MACS_peak_322
									RPL26					59.46	MACS_peak_301
									WFDC21P					56.99	MACS_peak_315
									SUZ12P1					63.91	MACS_peak_306
									KDM6B					333.74	MACS_peak_300
									PPM1E_dup1					51.58	MACS_peak_314
									RPL26_dup2					59.46	MACS_peak_301
									HEATR6					56.99	MACS_peak_315
									RPL26_dup1					59.46	MACS_peak_301
									MYOCD					59.01	MACS_peak_302
									SUZ12P1_dup2					63.91	MACS_peak_306
									PPM1E					51.58	MACS_peak_314
									RPTOR					56.12	MACS_peak_322
									TBX4					148.28	MACS_peak_316
									SRCIN1					629.06	MACS_peak_311
									DNAH2					360.75	MACS_peak_299
									PITPNM3					50.92	MACS_peak_298
									MYOCD_dup1					59.01	MACS_peak_302
									LINC00511					80.95	MACS_peak_319
									SMARCD2_dup2					812.03	MACS_peak_317
									PITPNM3_dup1					50.92	MACS_peak_298
									DNAH2_dup1					360.75	MACS_peak_299
									FN3K					235.01	MACS_peak_323
									MNT					132.68	MACS_peak_297
									SUZ12P1_dup1					63.91	MACS_peak_306
									LOC105371849					56.99	MACS_peak_315
									SMARCD2_dup1					812.03	MACS_peak_317
									LOC100128006					59.01	MACS_peak_302
									TBCD					235.01	MACS_peak_323
									TBX4_dup1					148.28	MACS_peak_316
									NFAT5_dup1					54.22	MACS_peak_289
									CNTNAP4_dup9					64.52	MACS_peak_292
									NFAT5					54.22	MACS_peak_289
									LOC101928737					125.23	MACS_peak_296
									WWOX_dup1					430.39	MACS_peak_293
									CNTNAP4_dup10					64.52	MACS_peak_292
									LOC388282					59.28	MACS_peak_283
									KIFC3_dup3					59.28	MACS_peak_283
									CNTNAP4					64.52	MACS_peak_292
									CNTNAP4_dup1					64.52	MACS_peak_292
									MIR1538					54.22	MACS_peak_289
									NFAT5_dup2					54.22	MACS_peak_289
									FA2H					277.27	MACS_peak_291
									NFAT5_dup4					54.22	MACS_peak_289
									CNTNAP4_dup2					64.52	MACS_peak_292
									CNTNAP4_dup11					64.52	MACS_peak_292
									WWOX					430.39	MACS_peak_293
									CDYL2					66.5	MACS_peak_294
									KIFC3_dup1					59.28	MACS_peak_283
									WWOX_dup3					430.39	MACS_peak_293
									CNTNAP4_dup13					64.52	MACS_peak_292
									WWOX_dup4					430.39	MACS_peak_293
									CNTNAP4_dup5					64.52	MACS_peak_292
									CNTNAP4_dup4					64.52	MACS_peak_292
									CNTNAP4_dup3					64.52	MACS_peak_292
									ZCCHC14					125.23	MACS_peak_296
									CNTNAP4_dup7					64.52	MACS_peak_292
									NFAT5_dup3					54.22	MACS_peak_289
									OSGIN1					198.65	MACS_peak_295
									ABCA17P					55.68	MACS_peak_273
									WWOX_dup2					430.39	MACS_peak_293
									CNTNAP4_dup8					64.52	MACS_peak_292
									NFAT5_dup5					54.22	MACS_peak_289
									CNTNAP4_dup12					64.52	MACS_peak_292
									KIFC3_dup5					59.28	MACS_peak_283
									CNTNAP4_dup6					64.52	MACS_peak_292
									USP3					226.19	MACS_peak_250
									DPP8_dup6					51.8	MACS_peak_254
									IL16_dup1					53.06	MACS_peak_263
									NEDD4					52.29	MACS_peak_241
									LIPC-AS1					277.31	MACS_peak_244
									ANXA2_dup1					113.53	MACS_peak_247
									SLCO3A1_dup1					62.82	MACS_peak_267
									CYP1A1_dup2					564.56	MACS_peak_259
									ZNF280D					71.29	MACS_peak_242
									GLCE_dup1					56.26	MACS_peak_256
									DPP8_dup4					51.8	MACS_peak_254
									UBE3A_dup2					50.56	MACS_peak_228
									UBE3A					50.56	MACS_peak_228
									IGF1R_dup1					156.71	MACS_peak_271
									DPP8_dup1					51.8	MACS_peak_254
									SLCO3A1_dup2					62.82	MACS_peak_267
									ANXA2_dup3					113.53	MACS_peak_247
									LIPC					277.31	MACS_peak_244
									SLCO3A1					62.82	MACS_peak_267
									ZNF280D_dup3					71.29	MACS_peak_242
									CYP1A1_dup1					564.56	MACS_peak_259
									TRIP4					82.67	MACS_peak_252
									ZNF280D_dup4					71.29	MACS_peak_242
									CASC4					533.46	MACS_peak_234
									ETFA					62.01	MACS_peak_262
									ZNF280D_dup1					71.29	MACS_peak_242
									SLC28A1_dup5					132.15	MACS_peak_264
									TRIP4_dup2					82.67	MACS_peak_252
									LOC101929076					673.27	MACS_peak_255
									GLCE					56.26	MACS_peak_256
									ETFA_dup1					62.01	MACS_peak_262
									DPP8_dup7					51.8	MACS_peak_254
									GLCE_dup3					56.26	MACS_peak_256
									CYP1A1					564.56	MACS_peak_259
									DPP8_dup2					51.8	MACS_peak_254
									ANXA2_dup2					113.53	MACS_peak_247
									GABRG3_dup1					89.44	MACS_peak_230
									NEDD4_dup1					52.29	MACS_peak_241
									IGF1R					156.71	MACS_peak_271
									DPP8_dup3					51.8	MACS_peak_254
									PDE8A_dup2					132.15	MACS_peak_264
									LINC00930					52.08	MACS_peak_268
									MIR548H4					56.26	MACS_peak_256
									USP3_dup1					226.19	MACS_peak_250
									ANXA2					113.53	MACS_peak_247
									PDE8A_dup1					132.15	MACS_peak_264
									TLE3					349.65	MACS_peak_257
									IL16					53.06	MACS_peak_263
									CRAT37					53.3	MACS_peak_266
									DPP8					51.8	MACS_peak_254
									TLE3_dup4					349.65	MACS_peak_257
									GLCE_dup4					56.26	MACS_peak_256
									GLCE_dup2					56.26	MACS_peak_256
									USP3_dup2					226.19	MACS_peak_250
									TLE3_dup1					349.65	MACS_peak_257
									SNHG14					50.56	MACS_peak_228
									TLE3_dup3					349.65	MACS_peak_257
									DPP8_dup5					51.8	MACS_peak_254
									ZNF280D_dup2					71.29	MACS_peak_242
									PDE8A					132.15	MACS_peak_264
									TLE3_dup2					349.65	MACS_peak_257
									TLE3_dup6					349.65	MACS_peak_257
									SLC28A1_dup4					132.15	MACS_peak_264
									CASC4_dup1					533.46	MACS_peak_234
									TRIP4_dup1					82.67	MACS_peak_252
									USP3_dup3					226.19	MACS_peak_250
									UBE3A_dup1					50.56	MACS_peak_228
									GABRG3					89.44	MACS_peak_230
									SNORD114-30					55.23	MACS_peak_226
									RAD51B_dup4					68.23	MACS_peak_217
									FUT8_dup3					82.86	MACS_peak_215
									RAD51B_dup8					68.23	MACS_peak_217
									SNORD114-31					55.23	MACS_peak_226
									SNORD114-27					55.23	MACS_peak_226
									NFATC4_dup3					125.34	MACS_peak_199
									TOGARAM1					57.79	MACS_peak_208
									MIPOL1					50.44	MACS_peak_205
									TOGARAM1_dup2					57.79	MACS_peak_208
									MDGA2_dup1					65.98	MACS_peak_210
									MIPOL1_dup1					50.44	MACS_peak_205
									RBM25					51.15	MACS_peak_218
									GPHN_dup1					53.28	MACS_peak_216
									FUT8_dup1					82.86	MACS_peak_215
									LRFN5_dup4					53.74	MACS_peak_207
									MDGA2					65.98	MACS_peak_210
									MDGA2_dup2					65.98	MACS_peak_210
									RAD51B_dup6					68.23	MACS_peak_217
									GPHN					53.28	MACS_peak_216
									NFATC4_dup1					125.34	MACS_peak_199
									YLPM1					51.85	MACS_peak_219
									RAD51B_dup7					68.23	MACS_peak_217
									NFATC4_dup5					125.34	MACS_peak_199
									TOGARAM1_dup1					57.79	MACS_peak_208
									OR4K17					57.24	MACS_peak_195
									RAD51B					68.23	MACS_peak_217
									SLC25A21					62.16	MACS_peak_204
									LRFN5_dup3					53.74	MACS_peak_207
									SNORD114-28					55.23	MACS_peak_226
									MEG8					55.23	MACS_peak_226
									ZFYVE26					68.23	MACS_peak_217
									RAD51B_dup1					68.23	MACS_peak_217
									NPAS3					95.14	MACS_peak_202
									NFATC4					125.34	MACS_peak_199
									RAD51B_dup9					68.23	MACS_peak_217
									RAD51B_dup3					68.23	MACS_peak_217
									FUT8_dup2					82.86	MACS_peak_215
									NFATC4_dup4					125.34	MACS_peak_199
									SNORD114-29					55.23	MACS_peak_226
									RAD51B_dup2					68.23	MACS_peak_217
									LRFN5_dup2					53.74	MACS_peak_207
									MIPOL1_dup2					50.44	MACS_peak_205
									NFATC4_dup6					125.34	MACS_peak_199
									NPAS3_dup2					95.14	MACS_peak_202
									LRFN5_dup5					53.74	MACS_peak_207
									SNORD114-26					55.23	MACS_peak_226
									LRFN5_dup1					53.74	MACS_peak_207
									FUT8_dup4					82.86	MACS_peak_215
									RAD51B_dup5					68.23	MACS_peak_217
									NPAS3_dup1					95.14	MACS_peak_202
									SLC25A21_dup1					62.16	MACS_peak_204
									NPAS3_dup3					95.14	MACS_peak_202
									FUT8					82.86	MACS_peak_215
									LRFN5					53.74	MACS_peak_207
									TDRD9					63.72	MACS_peak_227
									NFATC4_dup2					125.34	MACS_peak_199
									LINC00359					62.81	MACS_peak_189
									PSPC1_dup2					56.98	MACS_peak_173
									TMCO3					55.68	MACS_peak_193
									PCDH9_dup2					76.86	MACS_peak_178
									PCDH9					76.86	MACS_peak_178
									PSPC1_dup1					56.98	MACS_peak_173
									UGGT2					68.16	MACS_peak_187
									LINC00449					130.91	MACS_peak_191
									KLF12					52.56	MACS_peak_182
									PCDH9_dup1					76.86	MACS_peak_178
									LINC01232					130.91	MACS_peak_191
									SLAIN1					71.27	MACS_peak_185
									PSPC1					56.98	MACS_peak_173
									MIR3665					71.27	MACS_peak_185
									HS6ST3					57.69	MACS_peak_188
									PCDH9_dup3					76.86	MACS_peak_178
									LOC101929140					143.61	MACS_peak_176
									SLAIN1_dup1					71.27	MACS_peak_185
									PCDH9_dup4					140.17	MACS_peak_179
									RAP2A					225.42	MACS_peak_190
									RNF219-AS1					51.38	MACS_peak_186
									MYCBP2					215.64	MACS_peak_183
									TM9SF2					130.91	MACS_peak_191
									CAPS2_dup1					394.86	MACS_peak_163
									MIR6125					124	MACS_peak_159
									ATF7IP_dup1					164.73	MACS_peak_141
									SOX5_dup4					60.87	MACS_peak_143
									CAPS2_dup2					394.86	MACS_peak_163
									RPAP3_dup1					56.82	MACS_peak_150
									SOX5_dup3					60.87	MACS_peak_143
									CNTN1_dup1					54.32	MACS_peak_147
									KRT8_dup2					69.09	MACS_peak_152
									CAPS2_dup3					394.86	MACS_peak_163
									LGR5_dup2					65.25	MACS_peak_161
									GLI1_dup2					69.09	MACS_peak_155
									INHBE					69.09	MACS_peak_155
									ATF7IP_dup2					164.73	MACS_peak_141
									SOX5_dup2					60.87	MACS_peak_143
									LGR5_dup1					65.25	MACS_peak_161
									RPAP3_dup2					56.82	MACS_peak_150
									KRT8					69.09	MACS_peak_152
									ATF7IP_dup3					164.73	MACS_peak_141
									LGR5					65.25	MACS_peak_161
									ATF7IP					164.73	MACS_peak_141
									LGR5_dup3					65.25	MACS_peak_161
									GLIPR1L1					394.86	MACS_peak_163
									USP15					124	MACS_peak_159
									ATN1					54.72	MACS_peak_138
									SOX5					60.87	MACS_peak_143
									CNTN1					54.32	MACS_peak_147
									CAPS2					394.86	MACS_peak_163
									SOX5_dup5					60.87	MACS_peak_143
									GLI1_dup1					69.09	MACS_peak_155
									C12orf40_dup1					52.96	MACS_peak_145
									NELL2_dup4					56.17	MACS_peak_148
									GLI1					69.09	MACS_peak_155
									UBC					188.95	MACS_peak_171
									PTPRR					75.83	MACS_peak_160
									ENO2					54.72	MACS_peak_138
									MIR5188					188.95	MACS_peak_171
									GLIPR1L1_dup1					394.86	MACS_peak_163
									KRT8_dup1					69.09	MACS_peak_152
									USP15_dup2					124	MACS_peak_159
									KRT8_dup3					69.09	MACS_peak_152
									ATN1_dup1					54.72	MACS_peak_138
									RPAP3					56.82	MACS_peak_150
									SLC2A13					52.96	MACS_peak_145
									USP15_dup1					124	MACS_peak_159
									MSANTD4_dup3					66.06	MACS_peak_128
									MYO7A_dup1					56.81	MACS_peak_118
									CNTN5_dup2					52.32	MACS_peak_126
									INTS4					130.12	MACS_peak_119
									GRM5					59.4	MACS_peak_124
									DLG2_dup2					56.6	MACS_peak_121
									SYT7					608.48	MACS_peak_113
									MYO7A_dup2					56.81	MACS_peak_118
									OR5AS1					52.08	MACS_peak_109
									CNTN5_dup1					52.32	MACS_peak_126
									POLD4_dup2					217.61	MACS_peak_115
									SIK3_dup2					52.85	MACS_peak_133
									MYO7A					56.81	MACS_peak_118
									MSANTD4_dup1					66.06	MACS_peak_128
									POLD4					217.61	MACS_peak_115
									ARHGAP20_dup3					59.73	MACS_peak_130
									DLG2_dup1					56.6	MACS_peak_121
									NUMA1					100.48	MACS_peak_117
									SYT7_dup1					608.48	MACS_peak_113
									DLG2					56.6	MACS_peak_121
									SIK3_dup1					52.85	MACS_peak_133
									GLB1L3					66.98	MACS_peak_137
									NUMA1_dup1					100.48	MACS_peak_117
									FADS2					51.15	MACS_peak_114
									MSANTD4					66.06	MACS_peak_128
									DLG2_dup3					56.6	MACS_peak_121
									GLYAT_dup1					54.63	MACS_peak_111
									NTM_dup2					54.72	MACS_peak_136
									MSANTD4_dup4					66.06	MACS_peak_128
									GRM5_dup1					59.4	MACS_peak_124
									POLD4_dup3					217.61	MACS_peak_115
									SIK3					52.85	MACS_peak_133
									FADS2_dup1					51.15	MACS_peak_114
									CNTN5_dup3					52.32	MACS_peak_126
									ARHGAP20					59.73	MACS_peak_130
									LOC100130987					217.61	MACS_peak_115
									NUMA1_dup2					100.48	MACS_peak_117
									MSANTD4_dup2					66.06	MACS_peak_128
									ARHGAP20_dup2					59.73	MACS_peak_130
									DIXDC1_dup1					76.98	MACS_peak_131
									GLYAT					54.63	MACS_peak_111
									POLD4_dup4					217.61	MACS_peak_115
									DIXDC1_dup2					76.98	MACS_peak_131
									DLAT					76.98	MACS_peak_131
									NTM_dup3					54.72	MACS_peak_136
									CNTN5					52.32	MACS_peak_126
									FADS2_dup2					51.15	MACS_peak_114
									NAV2					445.83	MACS_peak_107
									ARHGAP20_dup4					59.73	MACS_peak_130
									NTM					54.72	MACS_peak_136
									SYT7_dup2					608.48	MACS_peak_113
									NTM_dup1					54.72	MACS_peak_136
									CYP2R1					84.26	MACS_peak_106
									ARHGAP20_dup1					59.73	MACS_peak_130
									POLD4_dup1					217.61	MACS_peak_115
									CLMP					260.43	MACS_peak_134
									DLG2_dup4					56.6	MACS_peak_121
									PTEN_dup2					156.3	MACS_peak_103
									MYOF_dup1					86.78	MACS_peak_104
									KLLN					156.3	MACS_peak_103
									LINC00866					56.96	MACS_peak_105
									ZNF33A_dup15					97.3	MACS_peak_100
									ZNF33A_dup14					97.3	MACS_peak_100
									SGMS1					152.92	MACS_peak_101
									SGMS1-AS1					152.92	MACS_peak_101
									PTEN					156.3	MACS_peak_103
									PTEN_dup1					156.3	MACS_peak_103
									MYOF					86.78	MACS_peak_104
									IPMK					121.84	MACS_peak_102
									CISD1					121.84	MACS_peak_102
									GBA_dup1					736.12	MACS_peak_57
									BPNT1					168.93	MACS_peak_91
									FAM189B_dup2					736.12	MACS_peak_57
									SYTL1_dup1					252.3	MACS_peak_16
									C1orf61_dup11					75.96	MACS_peak_59
									DDX59_dup1					199.91	MACS_peak_89
									C1orf61_dup1					75.96	MACS_peak_59
									ZBTB7B					343.21	MACS_peak_55
									ARPC5_dup1					53.34	MACS_peak_79
									C1orf61_dup6					75.96	MACS_peak_59
									MEX3A					63.37	MACS_peak_58
									PLD5					55.09	MACS_peak_99
									CASZ1					378.91	MACS_peak_5
									BRINP3					56.86	MACS_peak_82
									PLD5_dup1					55.09	MACS_peak_99
									LOC101928728					69.09	MACS_peak_11
									NR5A2_dup1					57.88	MACS_peak_88
									GBP3_dup4					68.56	MACS_peak_41
									NMNAT2_dup1					56.72	MACS_peak_78
									TRIM46_dup1					52.18	MACS_peak_56
									MTMR11_dup1					140.72	MACS_peak_52
									ZBTB41					78.38	MACS_peak_87
									ADGRL2_dup1					104.73	MACS_peak_37
									PCNX2					56.17	MACS_peak_97
									DDX59_dup2					199.91	MACS_peak_89
									MINOS1-NBL1					52.32	MACS_peak_9
									PFDN2					223.35	MACS_peak_63
									TRIM46_dup6					52.18	MACS_peak_56
									AK5_dup1					59	MACS_peak_34
									STX6					84.03	MACS_peak_76
									MINOS1_dup1					52.32	MACS_peak_9
									LMNA					63.37	MACS_peak_58
									GBP3_dup3					68.56	MACS_peak_41
									DDR2_dup1					55.64	MACS_peak_65
									ZBTB41_dup1					78.38	MACS_peak_87
									FNBP1L					51.8	MACS_peak_43
									KLHDC9_dup2					223.35	MACS_peak_63
									BRINP3_dup1					56.86	MACS_peak_82
									C1orf61_dup12					75.96	MACS_peak_59
									MINOS1_dup2					52.32	MACS_peak_9
									PIGM					175.1	MACS_peak_62
									LOC148696					290.01	MACS_peak_90
									FAM189B					736.12	MACS_peak_57
									ZBTB7B_dup4					343.21	MACS_peak_55
									C1orf61_dup8					75.96	MACS_peak_59
									C1orf132_dup1					290.01	MACS_peak_90
									ARPC5					53.34	MACS_peak_79
									C1orf61_dup5					75.96	MACS_peak_59
									TRIM46_dup8					52.18	MACS_peak_56
									ZBTB7B_dup3					343.21	MACS_peak_55
									ZBTB7B_dup1					343.21	MACS_peak_55
									TRIM46_dup5					52.18	MACS_peak_56
									LOC100996741					56.04	MACS_peak_51
									C1orf61					75.96	MACS_peak_59
									LRRC7_dup1					54.58	MACS_peak_31
									C1orf61_dup2					75.96	MACS_peak_59
									NMNAT2					56.72	MACS_peak_78
									BPNT1_dup1					168.93	MACS_peak_91
									NR5A2_dup2					57.88	MACS_peak_88
									TNNI3K					52.38	MACS_peak_32
									NR5A2					57.88	MACS_peak_88
									KLHDC9_dup1					223.35	MACS_peak_63
									EPS15_dup1					413.53	MACS_peak_28
									KLHDC9_dup3					223.35	MACS_peak_63
									CASZ1_dup1					378.91	MACS_peak_5
									FAM231D					56.04	MACS_peak_51
									C1orf61_dup3					75.96	MACS_peak_59
									LOC101929224					199.91	MACS_peak_89
									CAPN2					91.63	MACS_peak_93
									ZBTB7B_dup2					343.21	MACS_peak_55
									DDR2					55.64	MACS_peak_65
									BPNT1_dup2					168.93	MACS_peak_91
									KLHDC9					223.35	MACS_peak_63
									SYTL1					252.3	MACS_peak_16
									LOC388692					56.04	MACS_peak_51
									MINOS1					52.32	MACS_peak_9
									GBP3					68.56	MACS_peak_41
									RNU5F-1					168.93	MACS_peak_91
									FNBP1L_dup2					51.8	MACS_peak_43
									TRIM46					52.18	MACS_peak_56
									GBP3_dup2					68.56	MACS_peak_41
									ADGRL2_dup3					104.73	MACS_peak_37
									LOC100506023					71.4	MACS_peak_71
									DDX59					199.91	MACS_peak_89
									MIR9-1					75.96	MACS_peak_59
									PAPPA2_dup1					50.17	MACS_peak_72
									ARHGEF11_dup1					51.08	MACS_peak_60
									ARID1A_dup1					441.32	MACS_peak_13
									MINOS1_dup3					52.32	MACS_peak_9
									TRNAU1AP_dup1					286.54	MACS_peak_19
									FNBP1L_dup1					51.8	MACS_peak_43
									TRIM46_dup7					52.18	MACS_peak_56
									SLC2A1-AS1					94.15	MACS_peak_24
									SLC2A1					94.15	MACS_peak_24
									ASTN1_dup1					56.4	MACS_peak_73
									ARHGEF11					51.08	MACS_peak_60
									LRRC7					54.58	MACS_peak_31
									BPNT1_dup3					168.93	MACS_peak_91
									FPGT-TNNI3K_dup1					52.38	MACS_peak_32
									C1orf61_dup4					75.96	MACS_peak_59
									PRRC2C					54.25	MACS_peak_69
									STX6_dup1					84.03	MACS_peak_76
									TRIM46_dup2					52.18	MACS_peak_56
									BCL9					73.24	MACS_peak_49
									OTUD7B					140.72	MACS_peak_52
									PADI1					70.25	MACS_peak_7
									CAMTA1_dup2					55.2	MACS_peak_3
									FAM231D_dup1					56.04	MACS_peak_51
									C1orf132					290.01	MACS_peak_90
									ADGRL2_dup4					104.73	MACS_peak_37
									FPGT-TNNI3K					52.38	MACS_peak_32
									C1orf61_dup9					75.96	MACS_peak_59
									STX12					54.49	MACS_peak_18
									FAAH					146	MACS_peak_25
									CRB1					78.38	MACS_peak_87
									TRNAU1AP					286.54	MACS_peak_19
									IARS2					168.93	MACS_peak_91
									SHE_dup1					50.78	MACS_peak_54
									TRIM46_dup3					52.18	MACS_peak_56
									YARS					55.89	MACS_peak_21
									LMX1A_dup1					54.88	MACS_peak_68
									GBA					736.12	MACS_peak_57
									GBP3_dup1					68.56	MACS_peak_41
									MTMR11					140.72	MACS_peak_52
									BCAR3_dup4					58.34	MACS_peak_44
									ASTN1_dup2					56.4	MACS_peak_73
									PAPPA2					50.17	MACS_peak_72
									KRTCAP2					52.18	MACS_peak_56
									LINC01350					52.24	MACS_peak_81
									DNAH14					52.47	MACS_peak_94
									SHE					50.78	MACS_peak_54
									FAM69A					55.68	MACS_peak_42
									ASTN1					56.4	MACS_peak_73
									C1orf61_dup10					75.96	MACS_peak_59
									MINOS1-NBL1_dup1					52.32	MACS_peak_9
									GBA_dup4					736.12	MACS_peak_57
									RALGPS2_dup1					51.76	MACS_peak_75
									MINOS1_dup4					52.32	MACS_peak_9
									GBA_dup3					736.12	MACS_peak_57
									C1orf61_dup7					75.96	MACS_peak_59
									LMX1A					54.88	MACS_peak_68
									RALGPS2					51.76	MACS_peak_75
									DNAH14_dup1					52.47	MACS_peak_94
									GBA_dup2					736.12	MACS_peak_57
									ADGRL2_dup2					104.73	MACS_peak_37
									DAB1					59.61	MACS_peak_30
									FAM189B_dup1					736.12	MACS_peak_57
									ARID1A					441.32	MACS_peak_13
									TRIM46_dup4					52.18	MACS_peak_56
									AK5					59	MACS_peak_34
									ADGRL2					104.73	MACS_peak_37
									RPL5					55.68	MACS_peak_42
									DNAJC11					62.37	MACS_peak_2
