# Supplementary material for: FXR1 regulates transcription and is required for growth of human cancer cells with TP53/FXR2 homozygous deletion
Source: eLife journal article supplement (doi:10.7554/elife.26129), 2017-08-02
Supplement: supp [file elife-26129-supp-v2.zip › elife_poa_e26129_Supplementary_table_8.xls]

## Sheet: shRNA target sequence
shRNA target sequence
shRNA oligo	Target sequence:
FXR1-Tet-sh1	GCTAAAGTTCGGATGATGAAA
FXR1-Tet-sh2	CGCCAGGTTCCATTTAATGAA
FXR1-Tet-sh3	GCGAAGTATTCGTACGAAGTT
FXR1-Tet-sh4	CCAGCGAATCTCATCACAGTA
FXR1-Tet-sh5	CCAGAAATGAAGAGGCCACTA
FXR2-Tet-sh1	CGAGATACAATTCTTCATCTA
FXR2-Tet-sh2	GCGGATGATGAAGGGAGATTT
FXR2-Tet-sh3	CAGCGACAAGGCTGGATATAG
FXR2-Tet-sh4	TCGCTTGGAGAGGCTACAAAT
FXR2-Tet-sh5	GCGCACCAAACTGCTACTTAT
STAT3-Tet-sh2	CCCAAAGTATCAGGACGAGAA
Tet-on-shCtrl	CAACAAGATGAAGAGCACCAA

## Sheet: Antibodies used in this study
Antibodies used in this study
Antibody	Vendor	Catalog number	RRID
anti-CHD4	Active Motif	39289	AB_2614937
anti-cleaved PARP	Cell Signaling Technology (CST)	9541S	AB_331426
anti-Flag tag	Sigma	F3165/CST, 2368	AB_259529
anti-FXR1	Sigma	HPA018246	AB_1234375
anti-FXR2	Santa Cruz	sc-376963
anti-FMR1	Santa Cruz	sc-101048	AB_1122951
anti-GAPDH	CST	2118	AB_561053
anti-HA tag	CST	3724	AB_1549585
anti-Histone H3	CST	4499	AB_10544537
anti-H3K4me3	CST	9727L	AB_561095
anti-H3K9me3	Active Motif	39161	AB_2532132
anti-H3K27me3	Millipore	07-449	AB_310624
anti-p53	CST	9282	AB_331476
anti-PARP	CST	9542S	AB_2160739
anti-STAT1	Santa Cruz	sc-345	AB_675903
anti-STAT3	Santa Cruz	sc-482	AB_632440
anti-STAT1-pY701	CST	9167L	AB_561284
anti-STAT1-pS727	CST	8826
anti-STAT3-pY705	CST	4113	AB_2198591
anti-STAT3-pS727	Sigma	SAB4300034	AB_10628948
anti-TOP2A	Sigma	HPA006458	AB_1670057
anti-HSP90	CST	4874	AB_2121214
anti-SP1	CST	9389	AB_11220235
anti-E-cadherin	BD	610182	AB_397581
anti-EGFR	CST	2232	AB_331707
anti-RNAP II	Millipore	05-623	AB_309852
anti-MDM2	Sigma	WH0004193M1	AB_1842408
rabbit anti-Goat IgG-HRP linked antibody	Santa Cruz	sc-2922	AB_656965
anti-mouse IgG HRP linked antibody	CST	7076	AB_330924
anti-rabbit IgG HRP linked antibody	CST	7074	AB_2099233
anti-Rat IgG HRP linked antibody	CST	7077	AB_561114
mouse mAB IgG1 Isotype control	CST	5415	AB_10829607
rabbit (DA1E) mAb IgG XP Isotype control	CST	3900	AB_1550038

## Sheet: Sequence of genomic PCR primers
Sequence of genomic PCR primers
Genomic PCR primer	Primer sequence	Amplification target
DKO-primer1F	TAGTGGTGGGAAGGTTGGAAGTCC	DKO wild type clone at TP53 5' locus
DKO-primer1R	AAACTATAAAAAAACACTGACAGGAAG
DKO-primer2F	GATCAGGGAACCAACCTCTGGATC	DKO wild type clone at FXR2 3' locus
DKO-primer2R	TCAGCTTCTACAGGAACAGC
DKO-primer3F	GTGGTTGTTAAGAGATGAGATTAAAG	DKO clone with donor insertion at TP53 5' locus
DKO-primer3R	CAGAAAGCGAAGGAGCAAAGCTGC
DKO-primer4F	CATGGTCCTGCTGGAGTTCGTGAC	DKO clone with donor insertion at FXR2 3' locus
DKO-primer4R	TCAGCTTCTACAGGAACAGC
FXR2 KO-primer1F	GAAAGAAGGCTAATCTTG	FXR2 KO wild type clone at FXR2 5' locus
FXR2 KO-primer1R	GATTAAGGTCTAAGGTATGTC
FXR2 KO-primer2F	GATCAGGGAACCAACCTCTGGATC	FXR2 KO wild type clone at FXR2 3' locus
FXR2 KO-primer2R	TCAGCTTCTACAGGAACAGC
FXR2 KO-primer3F	CAGTAGAGAGTTACAGATTC	FXR2 KO clone with donor insertion at FXR2 5' locus
FXR2 KO-primer3R	GTGCTACTTCCATTTGTCACG
FXR2 KO-primer4F	CATGGTCCTGCTGGAGTTCGTGAC	FXR2 KO clone with donor insertion at FXR2 3' locus
FXR2 KO-primer4R	TCAGCTTCTACAGGAACAGC
TP53 KO-primer1F	TAGTGGTGGGAAGGTTGGAAGTCC	TP53 KO wild type clone at TP53 5' locus
TP53 KO-primer1R	AAACTATAAAAAAACACTGACAGGAAG
TP53 KO-primer2F	CACCTGAAGTCCAAAAAGGGTCAG	TP53 KO wild type clone at TP53 3' locus
TP53 KO-primer2R	GCCATGGTGGCATGAACCTGTGGTC
TP53 KO-primer3F	GTGGTTGTTAAGAGATGAGATTAAAG	TP53 KO clone with donor insertion at TP53 5' locus
TP53 KO-primer3R	CTAGGGGAGGAGTAGAAGGTGGC
TP53 KO-primer4F	CACTCTCGGCATGGACGAGCTG	TP53 KO clone with donor insertion at TP53 3' locus
TP53 KO-primer4R	GGTTCCTGAGTTATGAATGGAG
FXR1 KO-primer1F	TCCCAATCCCAGCCCTGTTT	FXR1 KO clone
FXR1 KO-primer1R	ACCGCCTCCTTTCACGACT

## Sheet: Sequence of ChIP-PCR primers
Sequence of ChIP-PCR primers
ChIP-PCR Primer	Sequence
ARID1A-ChIP-P1F	GGGAAACGAATCGTCTGAAC
ARID1A-ChIP-P1R	GCTTAGCACCTCTACAGCAC
ARID1A-ChIP-P2F	GTCCGTAGAAGGCTTTGAAG
ARID1A-ChIP-P2R	CAAAATTGGCCAGAGCCTG
ARID1A-ChIP-P3F	GCTACTTGTCATGGTAGGC
ARID1A-ChIP-P3R	GGAGGCCACTGAAGTTGC
ARID1A-ChIP-P4F	CCTTTGTGAAGGGAAGGGAG
ARID1A-ChIP-P4R	CTCAGCACTGCCATTTTACC
CASC4-ChIP-P1F	AGTTACGATTCATCGAGGGC
CASC4-ChIP-P1R	TTTCAGAATGTGGCGAGCTC
CASC4-ChIP-P2F	GGCCTTGAATCAAGGGAATC
CASC4-ChIP-P2R	TCAGATGTCTCAGGTACCTG
CASC4-ChIP-P3F	ACCGTGAGGTGTTGGGTTTG
CASC4-ChIP-P3R	CTCCTCAAATCAGGCCAAAAC
CASC4-ChIP-P4F	CTAGGGTACAGCCCGATTTG
CASC4-ChIP-P4R	GATGCTCCAGTAGTTGAAGG
GLI1-ChIP-P1F	GCAAATCTAAAGAGGCAGGG
GLI1-ChIP-P1R	GTGGATATGTGAGCTCTGAG
GLI1-ChIP-P2F	GATGCTCAGCTTCTTAGGGA
GLI1-ChIP-P2R	TTCTAATGTCTCACCCCAGG
GLI1-ChIP-P3F	GGAAGATGTCAGTGTTTCTG
GLI1-ChIP-P3R	CATCTGTCACAAGACAGGTC
GLI1-ChIP-P4F	CAGAATGCTCAGTTAGCACC
GLI1-ChIP-P4R	GAGAAGTTCAACCGAGAACG
NPAS3-ChIP-P1F	AGTACTTTTGAGGAGTCCGC
NPAS3-ChIP-P1R	AGCTTGTAGTCTCCCAAGAG
NPAS3-ChIP-M1F	CCTACCTGTAGAGTGTACTC
NPAS3-ChIP-M2R	ATTCGGTCTCTACGACTCCA
NPAS3-ChIP-P2F	CGTCCGTGACTGATGCAGAT
NPAS3-ChIP-P2R	GGGCAGCGGAAATCAATACG
NPAS3-ChIP-D1F	CACTACTTTTCCGTAGCCTC
NPAS3-ChIP-D1R	TACTTTTTGCCTCTCTCCCC
SRCIN1-ChIP-P1F	GCTCACTTCCATCAGGCTGT
SRCIN1-ChIP-P1R	GTCGCTCCTCCGTTCAGATT
SRCIN1-ChIP-P2F	GATCTGTCCCACTGGAGCTG
SRCIN1-ChIP-P2R	GGGGAATCTGGGACCTTGTC
SRCIN1-ChIP-P3F	CAACAGGTAGGCCAACGAAG
SRCIN1-ChIP-P3R	AGTGAGACCCCACCGTAGGA
SRCIN1-ChIP-P4F	CGAGAGCCTTTCCATCCCTA
SRCIN1-ChIP-P4R	TCTTCGCGCCACGATAGAG

## Sheet: Sequences of q-RT-PCR primers
Sequences of q-RT-PCR primers
Primer	Sequence
FXR1-F1	GTTCCAACATGGCGGAGCTG
FXR1-R1	AGGGAGTCTTCATGAACATC
FXR1-F2	GTTCATGAAGACTCCCTTAC
FXR1-R2	CTCTACTTCATCTCCTTCAC
FXR2-F1	TCCAACGGGGCCTTCTACAA
FXR2-R1	ATTATAGTCAGCTGGAGGTG
FXR2-F2	GTCCATGAAGACTCTGTCAC
FXR2-R2	CAGCCACAAGGTTCCTGTTC
FMR1-F1	AGGAGCTGGTGGTGGAAGTG
FMR1-R1	GGTGGGAATCTGACATCATG
FMR1-F2	CATGATGTCAGATTCCCACC
FMR1-R2	CTAACCACCAACAGCAAGGC
TP53-F1	AGTCAGATCCTAGCGTCGAG
TP53-R1	CTGGACCTGGGTCTTCAGTG
TP53-F2	AACCTACCAGGGCAGCTACG
TP53-R2	GAATCAACCCACAGCTGCAC
GAPDH-F	ACCACAGTCCATGCCATCAC
GAPDH-R	TCCACCACCCTGTTGCTGTA
Actin-F	GAGAAAATCTGGCACCACACC
Actin-R	ATACCCCTCGTAGATGGGCAC

## Sheet: Sequences of siRNA 
Sequences of siRNA
siRNA name	siRNA sequence
	sense（5'-3'）
FMR1-siRNA1	GCGTTTGGAGAGATTACAAAT
FMR1-siRNA3	CGAGATTTCATGAACAGTTTA
ARID1A-siRNA1	TGATCTATCTGGTTCAATA
ARID1A-siRNA2	GTGGTGGACTGCTCAGATA
ARID1A-siRNA3	AGGAGAAGCTGATCAGTAA
ARID1A-siRNA4	GTGTCTCTATGCCTTTGAA
ARID1A-siRNA5	GCCTCTATGTGTCTGTGAA
CASC4-siRNA1	CTGAGAATGTTGCAGATAA
CASC4-siRNA2	GCGAGGATGACAAGGTTAA
CASC4-siRNA3	GAAAGGAATTGGATATAAA
CASC4-siRNA4	TTGTGAAGAGGTTAGAATA
CASC4-siRNA5	GACAGCAGATGAAGGAATT
TRAPPC9-siRNA1	CAGCTTCTGTCATCTATCA
TRAPPC9-siRNA2	CACAGGAAGTTCTCATTGA
TRAPPC9-siRNA3	GAGGCGATTTCCTATTACA
TRAPPC9-siRNA4	TTCTTCTGGTGATGAAATA
TRAPPC9-siRNA5	GTCAGCAACTAATCATTAA
GLI1-siRNA1	GCCTGAATCTGTGTATGAA
GLI1-siRNA2	CTCAGCTTGTGTGTAATTA
GLI1-siRNA3	CAGTCAAGTTGACCAAGAA
GLI1-siRNA4	CAGCCAGTGTCCTCGACTT
GLI1-siRNA5	GTCCTCGACTTGAACATTA
CITED1-siRNA1	CTCACTTGCTGGCTAGTAT
CITED1-siRNA2	CCAATAGGCTCTCCTACAA
CITED1-siRNA3	CCAACCTTGCGGTGAAAGA
CITED1-siRNA4	GTATGCACCTGCAGAAACT
CITED1-siRNA5	TGCACCTGCAGAAACTTAA
NPAS3-siRNA1	GACACCATGTGAAGTTATA
NPAS3-siRNA2	GTCAGTGTGTGACAAAGTA
NPAS3-siRNA3	CTCTGAGTCAGACTCTAAA
NPAS3-siRNA4	CTTTGTATTTGCACTAAAT
NPAS3-siRNA5	CCCTGGATGGCTTTGTATT
SSBP2-siRNA1	GTGATAACATGTATACTTT
SSBP2-siRNA2	CCCAGGAAGTCAGCCATTA
SSBP2-siRNA3	CACTCTACGTATATGAATA
SSBP2-siRNA4	CCATGTAGGAGCTCAGAAA
SSBP2-siRNA5	CATTCTTGGTGGTGTGTAT
Control siRNA	MISSION® siRNA Universal Negative Control #2 (Sigma)
TP53-siRNA1	CCCATCCTCACCATCATCACA
TP53-siRNA2	CGGCGCACAGAGGAAGAGAAT

## Sheet: Cell line information
Cell line information
Cell line	Source	Identify	Mycoplasma contamination	RRID
		authentication
KATOIII	ATCC	STR profiling	Negative	CVCL_0371
HL-60	ATCC	STR profiling	Negative	CVCL_0002
H358	ATCC	STR profiling	Negative	CVCL_1559
MKN45	ATCC	STR profiling	Negative	CVCL_0434
AGS	ATCC	STR profiling	Negative	CVCL_0139
HepG2	ATCC	STR profiling	Negative	CVCL_0027
A549	ATCC	STR profiling	Negative	CVCL_0023
H1299	ATCC	STR profiling	Negative	CVCL_0060
MG-63	ATCC	STR profiling	Negative	CVCL_0426
SKOV3	ATCC	STR profiling	Negative	CVCL_0532
Hep3B	ATCC	STR profiling	Negative	CVCL_0326
HEK 293T	ATCC	STR profiling	Negative	CVCL_0063
KMS-11	Horizon Discovery Ltd. Cambridge, UK	STR profiling	Negative	CVCL_HE02
L540	Biovector Science Lab, Inc.	Although L540 is listed as a misidentified cell line by ICLAC, we verified the expression pattern and used it as a TP53 single deletion cell model.	Negative	CVCL_1362
ATCC, American Type Culture Collection (http://www.atcc.org).
ICLAC, International Cell Line Authentication Committee.
