# Supplementary material for: FXR1 regulates transcription and is required for growth of human cancer cells with TP53/FXR2 homozygous deletion
Source: eLife journal article supplement (doi:10.7554/elife.26129), 2017-08-02
Supplement: supp [file elife-26129-supp-v2.zip › elife_poa_e26129_Table_1_source_data.xls]

## Sheet: Cell proliferation
Cell line	Ctrl-	Ctrl+	sh3-	sh3+	Ctrl inhibition	sh3 inhibition	sh3-Ctrl
KATOIII	2.01	1.96	1.687	0.356	0.0248756	0.788975	0.764099	76.4099
HL60	1.2345	1.2275	1.08283	0.2815	0.00567031	0.740034	0.734364	73.4364
H358	1.2	1.402	1.16005	0.25	-0.168333	0.784492	0.952825	95.2825
KMS11
MKN45	2.44633	2.334	2.54367	2.34	0.0459191	0.0800681	0.0341491	3.41491
AGS	2.27467	2.163	2.25667	1.856	0.0490914	0.177548	0.128457	12.8457
A549	1.9468	1.807	1.9416	1.5006	0.0718101	0.227132	0.155322	15.5322
HepG2	2.31367	2.38733	2.34967	2.35967	-0.0318398	-0.00425592	0.0275839	2.75839
H1299	1.08467	1.152	1.208	1.296	-0.0620774	-0.0728477	-0.0107702	-1.07702
L540	1.21583	1.0415	1.0105	0.923833	0.143386	0.0857661	-0.0576198	-5.76198
MG63	0.884833	0.836833	1.17283	1.1615	0.0542475	0.00966321	-0.0445843	-4.45843
SKOV3	1.069	0.897333	0.973667	0.888	0.160586	0.0879836	-0.0726027	-7.26027
Hep3B	1.70167	1.658	1.69467	1.66467	0.0256611	0.0177026	-0.00795852	-0.795852
CRISPR Clone
AGS-DKO clone1	1.44376	1.46442	1.57609	1.56842	-0.0143115	0.0048671	0.0191786	1.91786
AGS-DKO clone5	1.572	1.5885	1.56733	1.5415	-0.0104962	0.0164823	0.0269785	2.69785
AGS-DKO 11	1.52633	1.51118	1.54867	0.761845	0.00992883	0.508064	0.498135	49.8135
AGS-DKO L7-1	1.685	1.709	1.696	0.558	-0.0142433	0.670991	0.685234	68.5234
AGS-DKO L7-3	1.6025	1.5475	1.4055	0.721	0.0343214	0.487015	0.452694	45.2694
AGS-FXR2 KO clone10	1.6085	1.65	1.789	1.22467	-0.0258004	0.315446	0.341246	34.1246
AGS-FXR2 KO clone11	1.79633	1.916	1.81267	1.58967	-0.0666174	0.123023	0.189641	18.9641
AGS-FXR2 KO clone5	1.62333	1.533	1.634	1.278	0.0556466	0.21787	0.162224	16.2224
AGS-FXR2 KO clone16	1.95133	2.00133	1.911	1.661	-0.0256235	0.130822	0.156445	15.6445
AGS-P53 KO 3-3	2.0335	1.84317	1.73217	1.66117	0.0935989	0.0409891	-0.0526098	-5.26098
AGS-P53 KO 3-10	1.62967	1.59202	1.609	1.66485	0.0231003	-0.0347136	-0.0578139	-5.78139
AGS-P53 KO 3-6-1	1.61667	1.594	1.60533	1.03633	0.0140206	0.354444	0.340423	34.0423
AGS-P53 KO 3-6-2	1.63714	1.55569	1.61914	1.62502	0.0497524	-0.00363266	-0.053385	-5.3385
AGS-P53 KO 3-14-6	1.1985	1.16317	1.17683	0.9945	0.0294813	0.154936	0.125454	12.5454
AGS-DKO-L7-1-Ctrl					AGS-DKO-L7-1-sh3
	Dox-	Dox+				Dox-	Dox+
1D	0.041	0.038667			1D	0.033667	0.027667
4D	0.358	0.306333			4D	0.257667	0.228
6D	1.34567	1.108			6D	1.32333	0.411
9D	1.685	1.709			9D	1.696	0.558
AGS-FXR2-10-Ctrl					AGS-FXR2-10-sh3
	Dox-	Dox+				Dox-	Dox+
0D	0.079667	0.082667			0D	0.082667	0.080667
3D	0.7945	0.8665			3D	0.989	0.74
5D	1.6085	1.65			5D	1.789	1.22467
rescue	Ctrl-	Ctrl+	sh3-	sh3+	Ctrl inhibition	sh3 inhibition	sh3+vector-	sh3+vector+	sh3+FXR1-V1-M-	sh3+FXR1-V1-M+	sh3+FXR1-V3-M-	sh3+FXR1-V3-M+	sh3+vector inhibition	sh3+FXR1-V1-M inhibition	sh3+FXR1-V3-M inhibition
HL60	1.23067	1.18167	1.072	0.415667	0.0398158	0.612251	0.994333	0.273333	1.27933	1.21633			0.725109	0.0492444
H358	1.7795	1.8885	2.3155	1.04267	-0.0612532	0.549701	1.43817	0.699167	2.0805	1.7595	1.802	1.039	0.513849	0.15429	0.423418

## Sheet: KD efficiency
HL60 rescue	FXR1-Dox-	FXR1-Dox+	GAPDH-Dox-	GAPDH-Dox+	Normalized Dox-	Normalized Dox+	Inhibition	Inhibition %
HL-60-ctrl sh	1.78171e+07	1.61825e+07	4.42034e+06	4.08813e+06	4.03072	3.9584	0.0179408	1.79408		sh3-Ctrl
HL-60-FXR1-sh3	1.80964e+07	3.91111e+06	3.94966e+06	3.81856e+06	4.58176	1.02424	0.776454	77.6454		75.8513
HL-60-FXR1-sh3+GFP vector	21625067	844680	4.11804e+06	4.03073e+06	5.2513	1.02166	0.805446	80.5446
HL-60-FXR1-sh3+FXR1-V1-M	1.35848e+07	1.3627e+07	3.72612e+06	3.73683e+06	3.64582	3.64667	-0.000231547	-0.0231547	Tet-on 6days
WBA_NRCNZJ-WDL30031 2013-07-25 11hr 15min_Exposure_20.0sec-volume
No.	Label	Type	Volume (Int)	Adj. Vol. (Int)	Mean Bkgd. (Int)	Abs. Quant.	Rel. Quant.	# of Pixels	Min. Value (Int)	Max. Value (Int)	Mean Value (Int)	Std. Dev.	Area (mm2)
1	U1	Unknown	19753403	1.78171e+07	1936.28	N/A	N/A	1000	0	65535	19753.4	22255.7	66.8847
2	U2	Unknown	4848352	4.42034e+06	1945.53	N/A	N/A	220	0	65535	22038	24142.3	14.7146
3	U3	Unknown	20362012	1.61825e+07	4179.56	N/A	N/A	1000	0	65535	20362	22185.8	66.8847
4	U4	Unknown	5052154	4.08813e+06	4381.94	N/A	N/A	220	456	65535	22964.3	24276.9	14.7146
5	U5	Unknown	21921007	1.80964e+07	3824.64	N/A	N/A	1000	88	65535	21921	20979.7	66.8847
6	U6	Unknown	4753000	3.94966e+06	3843.75	N/A	N/A	209	300	65535	22741.6	24357.1	13.9789
7	U7	Unknown	13077310	3.91111e+06	9166.2	N/A	N/A	1000	176	65535	13077.3	15191.6	66.8847
8	U8	Unknown	5199867	3.81856e+06	6609.11	N/A	N/A	209	232	65535	24879.7	24526.9	13.9789
9	U9	Unknown	26768567	21625067	5143.5	N/A	N/A	1000	836	65535	26768.6	23542.1	66.8847
10	U10	Unknown	5471744	4.11804e+06	6477.05	N/A	N/A	209	748	65535	26180.6	25768.7	13.9789
11	U11	Unknown	10661340	844680	9816.66	N/A	N/A	1000	72	47708	10661.3	9924.42	66.8847
12	U12	Unknown	5674511	4.03073e+06	7864.97	N/A	N/A	209	572	65535	27150.8	25927.2	13.9789
13	U13	Unknown	23399108	1.35848e+07	9814.33	N/A	N/A	1000	0	65535	23399.1	22842.7	66.8847
14	U14	Unknown	6066593	3.72612e+06	11198.4	N/A	N/A	209	440	65535	29026.8	26634.7	13.9789
15	U15	Unknown	16013926	1.3627e+07	2386.94	N/A	N/A	1000	0	65535	16013.9	21084.2	66.8847
16	U16	Unknown	5795231	3.73683e+06	9848.8	N/A	N/A	209	0	65535	27728.4	28216	13.9789
H358 rescue	FXR1-Dox-	FXR1-Dox+	GAPDH-Dox-	GAPDH-Dox+	Normalized Dox-	Normalized Dox+	Inhibition	Inhibition %
H358-ctrl sh	803552	1.59723e+06	1.00539e+06	1699472	0.799247	0.939837	-0.175902	-17.5902
H358-FXR1-sh3	4.04053e+06	-709157	2853256	2.86568e+06	1.41611	-0.247465	1.17475	117.475
H358-FXR1-sh3+GFP vector	3.64719e+06	671194	2.34903e+06	3.47946e+06	1.55264	0.675114	0.565182	56.5182
H358-FXR1-sh3+FXR1-V1-M	14713444	8290044	5.13159e+06	4.44979e+06	2.86723	1.86302	0.350238	35.0238
H358-FXR1-sh3+FXR1-V3-M	13126157	1.52128e+07	5.61563e+06	5.86884e+06	2.33743	2.59213	-0.108963	-10.8963	Tet-on 3days
WBA_NRCNZJ-WDL30031 2013-11-08 13hr 57min_Exposure_20.0sec
No.	Label	Type	Volume (Int)	Adj. Vol. (Int)	Mean Bkgd. (Int)	Abs. Quant.	Rel. Quant.	# of Pixels	Min. Value (Int)	Max. Value (Int)	Mean Value (Int)	Std. Dev.	Area (mm2)
1	U1	Unknown	1197732	1.00539e+06	874.303	N/A	N/A	220	0	35892	5444.24	7903.76	20.0283
2	U2	Unknown	1915632	1699472	982.545	N/A	N/A	220	0	47384	8707.42	13012.1	20.0283
3	U3	Unknown	4108786	2853256	5706.95	N/A	N/A	220	216	65535	18676.3	23216.7	20.0283
4	U4	Unknown	3922116	2.86568e+06	4801.97	N/A	N/A	220	80	65535	17827.8	22920.1	20.0283
5	U5	Unknown	4029207	2.34903e+06	7637.15	N/A	N/A	220	304	65535	18314.6	22558.2	20.0283
6	U6	Unknown	4526876	3.47946e+06	4760.97	N/A	N/A	220	224	65535	20576.7	24036.9	20.0283
7	U7	Unknown	6940356	5.86884e+06	4058.76	N/A	N/A	264	416	65535	26289.2	26105.5	24.034
8	U8	Unknown	7744874	5.61563e+06	8065.31	N/A	N/A	264	948	65535	29336.6	26767.1	24.034
9	U9	Unknown	7478896	5.13159e+06	10669.6	N/A	N/A	220	2176	65535	33995	26473.7	20.0283
10	U10	Unknown	7266686	4.44979e+06	12804.1	N/A	N/A	220	1460	65535	33030.4	27025.2	20.0283
11	U11	Unknown	1068652	803552	734.35	N/A	N/A	361	0	19932	2960.25	4757.77	32.8647
12	U12	Unknown	1968316	1.59723e+06	1027.95	N/A	N/A	361	0	37664	5452.4	8821.15	32.8647
13	U13	Unknown	4932288	4.04053e+06	2470.25	N/A	N/A	361	228	65535	13662.8	19002	32.8647
14	U14	Unknown	1030064	-709157	4817.79	N/A	N/A	361	0	17548	2853.36	3228.37	32.8647
15	U15	Unknown	4503234	3.64719e+06	2371.3	N/A	N/A	361	444	65535	12474.3	14118.9	32.8647
16	U16	Unknown	1950632	671194	3544.15	N/A	N/A	361	480	26528	5403.41	4343.19	32.8647
17	U17	Unknown	28148915	14713444	13908.4	N/A	N/A	966	0	65535	29139.7	24639	87.9426
18	U18	Unknown	28798952	8290044	21230.8	N/A	N/A	966	0	65535	29812.6	22440.4	87.9426
19	U19	Unknown	27124722	13126157	14491.3	N/A	N/A	966	0	65535	28079.4	23636.5	87.9426
20	U20	Unknown	23044639	1.52128e+07	6810.31	N/A	N/A	1150	16	65535	20038.8	23797.1	104.694
Cell lines	Dox-	Dox+	GAPDH-Dox-	GAPDH-Dox+	Normalized Dox-	Normalized Dox+	Inhibition	Inhibition %
KATOIII-Ctrl								15.01	6days	q-RT-PCR
KATOIII-FXR1-sh3								83.5	6days
HL60-Ctrl								1.79408	6days	Rescue
HL60-FXR1-sh3								77.6454	6days
H358	Jiao							79.85
KMS11	Jiao							95.73
A549	Jiao							72.65
H1299-Ctrl	1.47606e+08	1.86878e+08	6339600	6668745	23.2832	28.023	-0.203572	-20.3572
H1299-sh3	1.75949e+08	1.20739e+07	6280335	1.20739e+07	28.0158	1	0.964306	96.4306
L540-Ctrl	3.46684e+08	2.60459e+08	17770200	16258272	19.5093	16.0201	0.178847	17.8847
L540-sh3	1.78213e+08	7.54557e+06	16449576	13581720	10.8339	0.555568	0.94872	94.872
MG63-Ctrl	3.55421e+07	4.59314e+07	20115792	4.59314e+07	1.76687	1	0.434028	43.4028
MG63-sh3	2.01366e+08	6.21819e+06	27529344	26393784	7.31458	0.235593	0.967791	96.7791
SKOV3-Ctrl	2.07031e+08	2.54239e+08	16446125	27261975	12.5884	9.32578	0.259178	25.9178
SKOV3-sh3	3.17728e+08	3.48188e+07	20631450	20547800	15.4002	1.69452	0.889967	88.9967
Hep3B-Ctrl	1.01419e+08	7.86499e+07	4383540	2870571	23.1363	27.3987	-0.184232	-18.4232
Hep3B-sh3	1.71323e+08	8.37618e+06	4359663	3569456	39.2974	2.34663	0.940285	94.0285
AGS-Ctrl
AGS-sh3	68294	17017	42887	40484	1.59242	0.420339	0.736037	73.6037
HepG2-Ctrl
HepG2-sh3	45879	3811	76066	79467	0.603147	0.047957	0.920489	92.0489
MKN45-Ctrl	1	1.02745					-0.0274524	-2.74524	6days	q-RT-PCR
MKN45-FXR1-sh3	1	0.285316					0.714684	71.4684	6days
Jiao
	Cell line	Cancer	Gene TP53	Gene FXR2	FXR1 KD efficiency (%)
	H358	LC	Del	1.2	79.85
	KMS 11	MM	Del	Del	95.73
	A549	LC	2.7	2.7	72.65
	T.T	esophagus	Stop-gained		30.77
	LS411N	colorectal	Stop-gained		61.14
	SNU-387	liver	Stop-gained		79.66
	TC-71	Ewings_Sarcoma	Stop-gained		43.66
	NCI-H2172	lung_NSC	frame shift		90.11
	KP-3	pancreas	frame shift		76.56
	A-673	Ewings_Sarcoma	frame shift		76.51
	HT-29	Colorectum_NOS	p.R273H		82.65
	SNU-638	stomach	p.R282W		71.46
	SNU-398	liver	Synonymous-coding		34.84
	Cell line	Cancer	Gene TP53	Gene FXR2	FXR1 KD efficiency (%)
	KatoIII-ctrl sh	GC	Del	Del	15.01
	KatoIII-FXR1-sh3	GC	Del	Del	83.48
1.5 ml virus	KatoIII-FXR1-sh3+GFP vector	GC	Del	Del	91.73	sh3/vector-Ctrl	76.72
	KatoIII-FXR1-sh3+FXR1-V1-M	GC	Del	Del	19.62
	KatoIII-FXR1-sh3+FXR2	GC	Del	Rescue	78.84
0.5 ml virus	KatoIII-FXR1-sh3+GFP vector	GC	Del	Del	86.72
	KatoIII-FXR1-sh3+FXR1-V1-M	GC	Del	Del	45.55
	KatoIII-FXR1-sh3+FXR2	GC	Del	Rescue	82.13
	HL-60-ctrl sh	AML	Del	Del	-3.57
	HL-60-FXR1-sh3	AML	Del	Del	63.76
	HL-60-FXR1-sh3+GFP vector	AML	Del	Del	77.88
	HL-60-FXR1-sh3+FXR1-V1-M	AML	Del	Del	48.66
	HL-60-FXR1-sh3+FXR2	AML	Del	Rescue	28.25
SKOV3-LANE9-12
NRCNZJ, WDL30031 (Gen) - WBA (APNET) 2015-09-25 09hr 00min_Exposure_7.6sec
Lane 9									Lane 10									Lane 11									Lane 12
Band No.	Band Label	Mol. Wt. (KDa)	Relative Front	Volume (Int)	Abs. Quant.	Rel. Quant.	Band %	Lane %	Band No.	Band Label	Mol. Wt. (KDa)	Relative Front	Volume (Int)	Abs. Quant.	Rel. Quant.	Band %	Lane %	Band No.	Band Label	Mol. Wt. (KDa)	Relative Front	Volume (Int)	Abs. Quant.	Rel. Quant.	Band %	Lane %	Band No.	Band Label	Mol. Wt. (KDa)	Relative Front	Volume (Int)	Abs. Quant.	Rel. Quant.	Band %	Lane %
1		N/A	0.09571	2726100	N/A	N/A	8.03416	7.86382	1		N/A	0.102389	5112575	N/A	N/A	10.5228	10.3147	1		N/A	0.110714	6573600	N/A	N/A	10.1186	9.65681	1		N/A	0.116105	1247875	N/A	N/A	3.57965	3.45697
2		N/A	0.141914	8021125	N/A	N/A	23.6393	23.1381	2		N/A	0.146758	9993875	N/A	N/A	20.5695	20.1628	2		N/A	0.157143	13155700	N/A	N/A	20.2502	19.3261	2		N/A	0.164794	3318350	N/A	N/A	9.519	9.19279
3		N/A	0.254125	244300	N/A	N/A	0.719983	0.704717	3		N/A	0.269625	349150	N/A	N/A	0.718625	0.704415	3		N/A	0.285714	1088600	N/A	N/A	1.67565	1.59918	3		N/A	0.299625	511700	N/A	N/A	1.46786	1.41756
4		N/A	0.339934	3346300	N/A	N/A	9.86196	9.65287	4		N/A	0.354949	4028550	N/A	N/A	8.29162	8.12766	4		N/A	0.375	7718450	N/A	N/A	11.8808	11.3386	4		N/A	0.393258	2573550	N/A	N/A	7.38247	7.12948
5		N/A	0.412541	3147425	N/A	N/A	9.27585	9.07919	5		N/A	0.447099	7414925	N/A	N/A	15.2615	14.9597	5		N/A	0.485714	8417300	N/A	N/A	12.9565	12.3653	5		N/A	0.561798	6208375	N/A	N/A	17.8093	17.199
6		N/A	0.838284	16446125	N/A	N/A	48.4688	47.4411	6		N/A	0.730375	1055300	N/A	N/A	2.17203	2.12908	6		N/A	0.735714	750100	N/A	N/A	1.15461	1.10192	6		N/A	0.76779	452625	N/A	N/A	1.2984	1.2539
									7		N/A	0.866894	20631450	N/A	N/A	42.4639	41.6243	7		N/A	0.903571	27261975	N/A	N/A	41.9636	40.0486	7		N/A	0.940075	20547800	N/A	N/A	58.9433	56.9233
				2.07031e+08									2.54239e+08									3.17728e+08									3.48188e+07
L540-LANE1-4
NRCNZJ, WDL30031 (Gen) - WBA (APNET) 2015-06-09 13hr 58min_Exposure_60.0sec
Lane 1									Lane 2									Lane 3									Lane 4									Lane 5									Lane 6
Band No.	Band Label	Mol. Wt. (KDa)	Relative Front	Volume (Int)	Abs. Quant.	Rel. Quant.	Band %	Lane %	Band No.	Band Label	Mol. Wt. (KDa)	Relative Front	Volume (Int)	Abs. Quant.	Rel. Quant.	Band %	Lane %	Band No.	Band Label	Mol. Wt. (KDa)	Relative Front	Volume (Int)	Abs. Quant.	Rel. Quant.	Band %	Lane %	Band No.	Band Label	Mol. Wt. (KDa)	Relative Front	Volume (Int)	Abs. Quant.	Rel. Quant.	Band %	Lane %	Band No.	Band Label	Mol. Wt. (KDa)	Relative Front	Volume (Int)	Abs. Quant.	Rel. Quant.	Band %	Lane %	Band No.	Band Label	Mol. Wt. (KDa)	Relative Front	Volume (Int)
1		N/A	0.131579	485304	N/A	N/A	1.56427	1.52309	1		N/A	0.140351	424440	N/A	N/A	1.56597	1.53252	1		N/A	0.149123	488736	N/A	N/A	1.9625	1.91638	1		N/A	0.153509	225600	N/A	N/A	1.50027	1.44806	1		N/A	0.004386	551904	N/A	N/A	2.26317	2.19706	1		N/A	0.008772	1324872
2		N/A	0.307018	2580384	N/A	N/A	8.31728	8.09836	2		N/A	0.320175	1967832	N/A	N/A	7.2603	7.10521	2		N/A	0.328947	1610160	N/A	N/A	6.46554	6.31358	2		N/A	0.328947	157200	N/A	N/A	1.0454	1.00902	2		N/A	0.328947	855768	N/A	N/A	3.50922	3.40671	2		N/A	0.144737	1603272
3		N/A	0.377193	10188504	N/A	N/A	32.8403	31.9759	3		N/A	0.390351	8262168	N/A	N/A	30.4832	29.832	3		N/A	0.399123	6546552	N/A	N/A	26.2874	25.6696	3		N/A	0.399123	1072776	N/A	N/A	7.1341	6.88583	3		N/A	0.394737	2862840	N/A	N/A	11.7395	11.3966	3		N/A	0.328947	1262376
4		N/A	0.837719	17770200	N/A	N/A	57.2782	55.7706	4		N/A	0.846491	16449576	N/A	N/A	60.6905	59.3942	4		N/A	0.850877	16258272	N/A	N/A	65.2845	63.7501	4		N/A	0.850877	13581720	N/A	N/A	90.3202	87.177	4		N/A	0.850877	20115792	N/A	N/A	82.4881	80.0785	4		N/A	0.399123	3662832
																																													5		N/A	0.850877	24147096
				3.46684e+08									2.60459e+08									1.78213e+08									7.54557e+06
MG63-LANE5-8
Lane 5									Lane 6									Lane 7									Lane 8
Band No.	Band Label	Mol. Wt. (KDa)	Relative Front	Volume (Int)	Abs. Quant.	Rel. Quant.	Band %	Lane %	Band No.	Band Label	Mol. Wt. (KDa)	Relative Front	Volume (Int)	Abs. Quant.	Rel. Quant.	Band %	Lane %	Band No.	Band Label	Mol. Wt. (KDa)	Relative Front	Volume (Int)	Abs. Quant.	Rel. Quant.	Band %	Lane %	Band No.	Band Label	Mol. Wt. (KDa)	Relative Front	Volume (Int)	Abs. Quant.	Rel. Quant.	Band %	Lane %
1		N/A	0.004386	551904	N/A	N/A	2.26317	2.19706	1		N/A	0.008772	1324872	N/A	N/A	4.14017	4.05419	1		N/A	0.153509	703032	N/A	N/A	1.74417	1.6968	1		N/A	0.144737	548232	N/A	N/A	1.90438	1.84719
2		N/A	0.328947	855768	N/A	N/A	3.50922	3.40671	2		N/A	0.144737	1603272	N/A	N/A	5.01016	4.90612	2		N/A	0.328947	3743568	N/A	N/A	9.28749	9.03528	2		N/A	0.328947	656832	N/A	N/A	2.28162	2.2131
3		N/A	0.394737	2862840	N/A	N/A	11.7395	11.3966	3		N/A	0.328947	1262376	N/A	N/A	3.94487	3.86295	3		N/A	0.399123	8331696	N/A	N/A	20.6703	20.1089	3		N/A	0.394737	1189152	N/A	N/A	4.13072	4.00668
4		N/A	0.850877	20115792	N/A	N/A	82.4881	80.0785	4		N/A	0.399123	3662832	N/A	N/A	11.4462	11.2085	4		N/A	0.846491	27529344	N/A	N/A	68.2981	66.4433	4		N/A	0.850877	26393784	N/A	N/A	91.6833	88.9301
									5		N/A	0.850877	24147096	N/A	N/A	75.4586	73.8917
				3.55421e+07									4.59314e+07									2.01366e+08									6.21819e+06
H1299-LANE1-4
NRCNZJ, WDL30031 (Gen) - WBA (APNET) 2015-09-01 13hr 16min_Exposure_180.0sec
Lane 1									Lane 2									Lane 3									Lane 4									Lane 5									Lane 6
Band No.	Band Label	Mol. Wt. (KDa)	Relative Front	Volume (Int)	Abs. Quant.	Rel. Quant.	Band %	Lane %	Band No.	Band Label	Mol. Wt. (KDa)	Relative Front	Volume (Int)	Abs. Quant.	Rel. Quant.	Band %	Lane %	Band No.	Band Label	Mol. Wt. (KDa)	Relative Front	Volume (Int)	Abs. Quant.	Rel. Quant.	Band %	Lane %	Band No.	Band Label	Mol. Wt. (KDa)	Relative Front	Volume (Int)	Abs. Quant.	Rel. Quant.	Band %	Lane %	Band No.	Band Label	Mol. Wt. (KDa)	Relative Front	Volume (Int)	Abs. Quant.	Rel. Quant.	Band %	Lane %	Band No.	Band Label	Mol. Wt. (KDa)	Relative Front	Volume (Int)
1		N/A	0.170732	925905	N/A	N/A	8.12999	7.65286	1		N/A	0.182927	1496070	N/A	N/A	11.4672	10.7244	1		N/A	0.182927	1187730	N/A	N/A	9.81235	9.12307	1		N/A	0.195122	100350	N/A	N/A	1.36282	1.19162	1		N/A	0.195122	431175	N/A	N/A	5.01528	4.92113	1		N/A	0.195122	585405
2		N/A	0.280488	4123260	N/A	N/A	36.2046	34.0799	2		N/A	0.292683	4881750	N/A	N/A	37.4179	34.9944	2		N/A	0.292683	4636380	N/A	N/A	38.3031	35.6125	2		N/A	0.304878	1003350	N/A	N/A	13.6262	11.9144	2		N/A	0.304878	2155680	N/A	N/A	25.0742	24.6034	2		N/A	0.304878	2487210
3		N/A	0.841463	6339600	N/A	N/A	55.6654	52.3986	3		N/A	0.853659	6668745	N/A	N/A	51.1149	47.8043	3		N/A	0.865854	6280335	N/A	N/A	51.8845	48.2398	3		N/A	0.865854	6259710	N/A	N/A	85.011	74.3315	3		N/A	0.512195	754125	N/A	N/A	8.77173	8.60705	3		N/A	0.52439	945375
																																				4		N/A	0.865854	5256240	N/A	N/A	61.1388	59.991	4		N/A	0.865854	5704050
				1.47606e+08									1.86878e+08									1.75949e+08									1.20739e+07
AGS-ImageJ
1	1496	45.651	68294	68294
2	1496	11.375	17017	17017
3	840	51.056	42887	42887
4	840	48.195	40484	40484
HepG2-ImageJ
1	792	57.928	45879	45879
2	792	4.812	3811	3811
3	792	96.043	76066	76066
4	792	100.337	79467	79467
Hep3B
NRCNZJ, WDL30031 (Gen) - WBA (APNET) 2015-10-21 17hr 31min_Exposure_60.0sec
Lane 1									Lane 2									Lane 3									Lane 4
Band No.	Band Label	Mol. Wt. (KDa)	Relative Front	Volume (Int)	Abs. Quant.	Rel. Quant.	Band %	Lane %	Band No.	Band Label	Mol. Wt. (KDa)	Relative Front	Volume (Int)	Abs. Quant.	Rel. Quant.	Band %	Lane %	Band No.	Band Label	Mol. Wt. (KDa)	Relative Front	Volume (Int)	Abs. Quant.	Rel. Quant.	Band %	Lane %	Band No.	Band Label	Mol. Wt. (KDa)	Relative Front	Volume (Int)	Abs. Quant.	Rel. Quant.	Band %	Lane %
1		N/A	0.521127	185750	N/A	N/A	13.5362	13.0616	1		N/A	0.521127	73600	N/A	N/A	7.67995	7.34428	1		N/A	0.527778	75980	N/A	N/A	4.0159	3.94026	1		N/A	0.527778	9980	N/A	N/A	7.53094	5.53031
2		N/A	0.633803	1186500	N/A	N/A	86.4638	83.4324	2		N/A	0.633803	884740	N/A	N/A	92.3201	88.2851	2		N/A	0.652778	1816000	N/A	N/A	95.9841	94.1762	2		N/A	0.652778	122540	N/A	N/A	92.4691	67.9042
				1.01419e+08									7.86499e+07									1.71323e+08									8.37618e+06
NRCNZJ, WDL30031 (Gen) - WBA (APNET) 2015-10-21 17hr 31min_Exposure_40.3sec
Lane 1									Lane 2									Lane 3									Lane 4
Band No.	Band Label	Mol. Wt. (KDa)	Relative Front	Volume (Int)	Abs. Quant.	Rel. Quant.	Band %	Lane %	Band No.	Band Label	Mol. Wt. (KDa)	Relative Front	Volume (Int)	Abs. Quant.	Rel. Quant.	Band %	Lane %	Band No.	Band Label	Mol. Wt. (KDa)	Relative Front	Volume (Int)	Abs. Quant.	Rel. Quant.	Band %	Lane %	Band No.	Band Label	Mol. Wt. (KDa)	Relative Front	Volume (Int)	Abs. Quant.	Rel. Quant.	Band %	Lane %
1		N/A	0.317073	4383540	N/A	N/A	100	99.5387	1		N/A	0.317073	2870571	N/A	N/A	100	99.3501	1		N/A	0.341463	4359663	N/A	N/A	100	99.0303	1		N/A	0.341463	3569456	N/A	N/A	100	99.1354
CRISPR
Mengtao
AGS-DKO clone5	Gastric			WT	WT	86
AGS-DKO 11	Gastric			KO	KO	79
AGS-DKO L7	Gastric			KO	KO	87.5
AGS-FXR2 KO clone16	Gastric			WT	KO	72.9
AGS-P53 KO 3-10	Gastric			WT	WT	92.9
AGS-P53 KO 3-6-1	Gastric			KO	WT	85.3
AGS-P53 KO 3-6-2	Gastric			KO	WT	81.4
AGS-DKO clone1	Gastric			WT	WT	88.8
AGS-FXR2 KO clone11	Gastric			WT	WT	75.8
AGS-FXR2 KO clone5	Gastric			WT	KO	81.3
AGS-P53 KO 3-3	Gastric			WT	WT	51.1
AGS-P53 KO 3-14-6	Gastric			KO	WT	86.2
Cell lines	Dox-	Dox+	GAPDH-Dox-	GAPDH-Dox+	Normalized Dox-	Normalized Dox+	Inhibition	Inhibition %
AGS-DKO1-Ctrl	2365944	2799174	5838826	5094810	0.405209	0.549417	-0.355885	-35.5885
AGS-DKO1-sh3	4625566	333828	4536345	2922524	1.01967	0.114226	0.887977	88.7977
AGS-TP53 KO-3-3-Ctrl	2572986	5432240	4325529	5584912	0.594837	0.972663	-0.635176	-63.5176
AGS-TP53 KO-3-3-FXR1-sh3	4309240	1938287	4934020	4539119	0.873373	0.427018	0.51107	51.107
AGS-TP53 KO-3-14-6-Ctrl	3788550	3897712	12817242	7485075	0.295582	0.520731	-0.761713	-76.1713
AGS-TP53 KO-3-14-6-FXR1-sh3	4799816	708432	7916370	8469712	0.606315	0.083643	0.862047	86.2047
DKO1
NRCNZJ, WDL30031 (Gen) - WBA (APNET) 2015-11-24 17hr 57min_Exposure_22.7sec
Lane 1
Band No.	Band Label	Mol. Wt. (KDa)	Relative Front	Volume (Int)	Abs. Quant.	Rel. Quant.	Band %	Lane %	Lane 2									Lane 3									Lane 4
1		N/A	0.08	265174	N/A	N/A	3.23195	2.86252	Band No.	Band Label	Mol. Wt. (KDa)	Relative Front	Volume (Int)	Abs. Quant.	Rel. Quant.	Band %	Lane %	Band No.	Band Label	Mol. Wt. (KDa)	Relative Front	Volume (Int)	Abs. Quant.	Rel. Quant.	Band %	Lane %	Band No.	Band Label	Mol. Wt. (KDa)	Relative Front	Volume (Int)	Abs. Quant.	Rel. Quant.	Band %	Lane %
2		N/A	0.186667	2100770	N/A	N/A	25.6043	22.6775	1		N/A	0.106667	501018	N/A	N/A	6.34683	5.71709	1		N/A	0.12	1248896	N/A	N/A	13.6314	11.3637	1		N/A	0.226667	333828	N/A	N/A	10.2516	8.47014
3		N/A	0.733333	5838826	N/A	N/A	71.1638	63.0294	2		N/A	0.213333	2298156	N/A	N/A	29.1128	26.2242	2		N/A	0.213333	3376670	N/A	N/A	36.8555	30.7244	2		N/A	0.773333	2922524	N/A	N/A	89.7484	74.1525
				2365944					3		N/A	0.76	5094810	N/A	N/A	64.5404	58.1366	3		N/A	0.773333	4536345	N/A	N/A	49.5131	41.2763
													2799174									4625566									333828
TP53 KO-3-3
NRCNZJ, WDL30031 (Gen) - WBA (APNET) 2015-11-24 17hr 52min_Exposure_7.2sec
Lane 1
Band No.	Band Label	Mol. Wt. (KDa)	Relative Front	Volume (Int)	Abs. Quant.	Rel. Quant.	Band %	Lane %	Lane 2									Lane 3									Lane 4
1		N/A	0.182927	422448	N/A	N/A	6.12375	5.82229	Band No.	Band Label	Mol. Wt. (KDa)	Relative Front	Volume (Int)	Abs. Quant.	Rel. Quant.	Band %	Lane %	Band No.	Band Label	Mol. Wt. (KDa)	Relative Front	Volume (Int)	Abs. Quant.	Rel. Quant.	Band %	Lane %	Band No.	Band Label	Mol. Wt. (KDa)	Relative Front	Volume (Int)	Abs. Quant.	Rel. Quant.	Band %	Lane %
2		N/A	0.292683	2150538	N/A	N/A	31.1739	29.6393	1		N/A	0.182927	1328528	N/A	N/A	12.0587	11.298	1		N/A	0.170732	843518	N/A	N/A	9.12576	8.43907	1		N/A	0.146341	404976	N/A	N/A	6.25213	5.61837
3		N/A	0.890244	4325529	N/A	N/A	62.7023	59.6156	2		N/A	0.280488	4103712	N/A	N/A	37.2484	34.8985	2		N/A	0.280488	3465722	N/A	N/A	37.4946	34.6732	2		N/A	0.268293	1533311	N/A	N/A	23.6717	21.2721
				2572986					3		N/A	0.890244	5584912	N/A	N/A	50.6929	47.4948	3		N/A	0.878049	4934020	N/A	N/A	53.3797	49.363	3		N/A	0.865854	4539119	N/A	N/A	70.0762	62.9727
													5432240									4309240									1938287
AGS-TP53 KO-3-14-6
NRCNZJ, WDL30031 (Gen) - WBA (APNET) 2015-12-10 19hr 36min_Exposure_13.4sec
Lane 1
Band No.	Band Label	Mol. Wt. (KDa)	Relative Front	Volume (Int)	Abs. Quant.	Rel. Quant.	Band %	Lane %	Lane 2									Lane 3									Lane 4
1		N/A	0.113636	345672	N/A	N/A	2.08163	1.95732	Band No.	Band Label	Mol. Wt. (KDa)	Relative Front	Volume (Int)	Abs. Quant.	Rel. Quant.	Band %	Lane %	Band No.	Band Label	Mol. Wt. (KDa)	Relative Front	Volume (Int)	Abs. Quant.	Rel. Quant.	Band %	Lane %	Band No.	Band Label	Mol. Wt. (KDa)	Relative Front	Volume (Int)	Abs. Quant.	Rel. Quant.	Band %	Lane %
2		N/A	0.204545	3442878	N/A	N/A	20.733	19.4949	1		N/A	0.113636	942188	N/A	N/A	8.27731	7.57913	1		N/A	0.113636	1193640	N/A	N/A	9.38678	8.45881	1		N/A	0.125	132560	N/A	N/A	1.4443	1.35731
3		N/A	0.659091	12817242	N/A	N/A	77.1854	72.576	2		N/A	0.204545	2955524	N/A	N/A	25.9649	23.7748	2		N/A	0.204545	3606176	N/A	N/A	28.3589	25.5554	2		N/A	0.215909	575872	N/A	N/A	6.27438	5.89649
				3788550					3		N/A	0.659091	7485075	N/A	N/A	65.7578	60.2113	3		N/A	0.670455	7916370	N/A	N/A	62.2543	56.0999	3		N/A	0.670455	8469712	N/A	N/A	92.2813	86.7234
													3897712									4799816									708432
[truncated: 58 more columns]
