# Supplementary material for: FXR1 regulates transcription and is required for growth of human cancer cells with TP53/FXR2 homozygous deletion
Source: eLife journal article supplement (doi:10.7554/elife.26129), 2017-08-02
Supplement: supp [file elife_poa_e26129_Figure_1_figure_supplement_1.pdf › elife_poa_e26129_Figure_1_figure_supplement_1.pdf]

Fig 1-S1

A

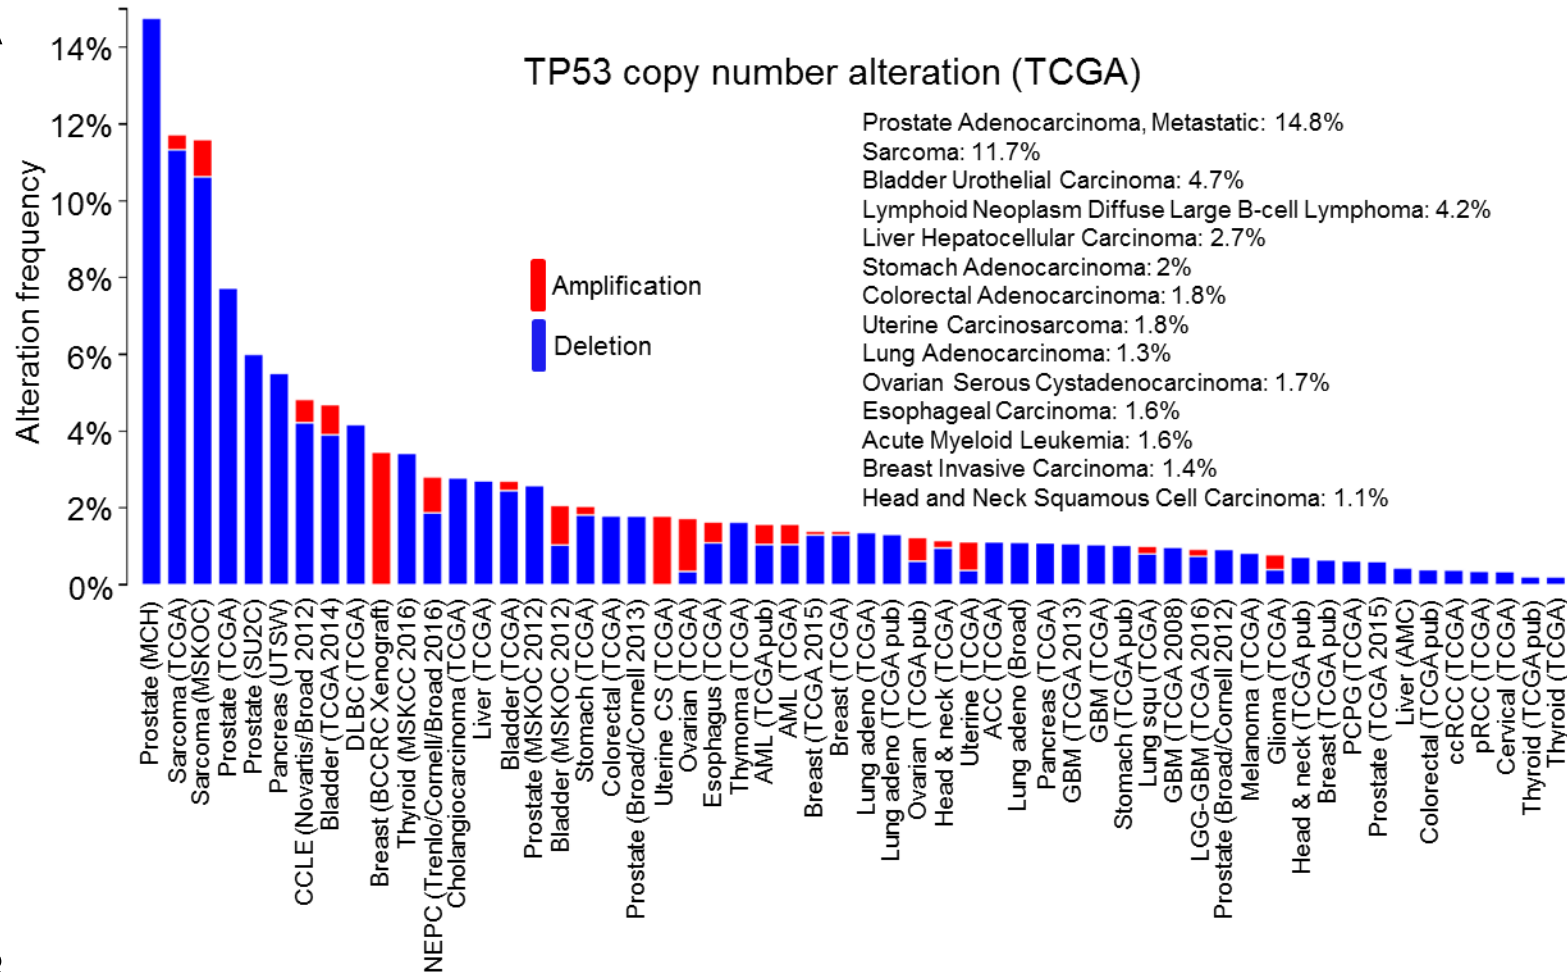

B

DNA copy number alteration (CCLE)

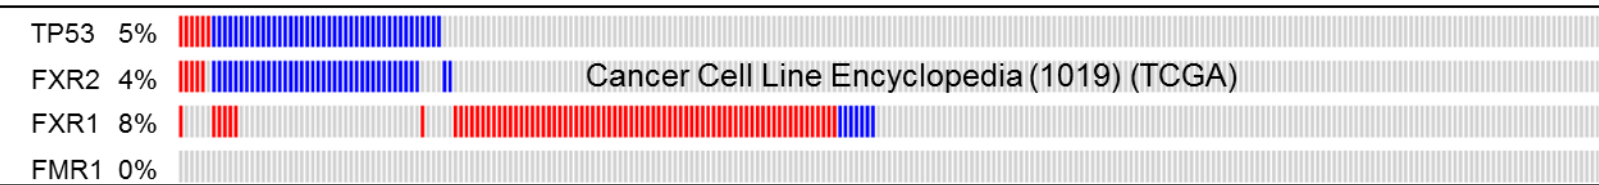

C

TP53 and POLR2A DNA copy number alteration in human tumor (TCGA)

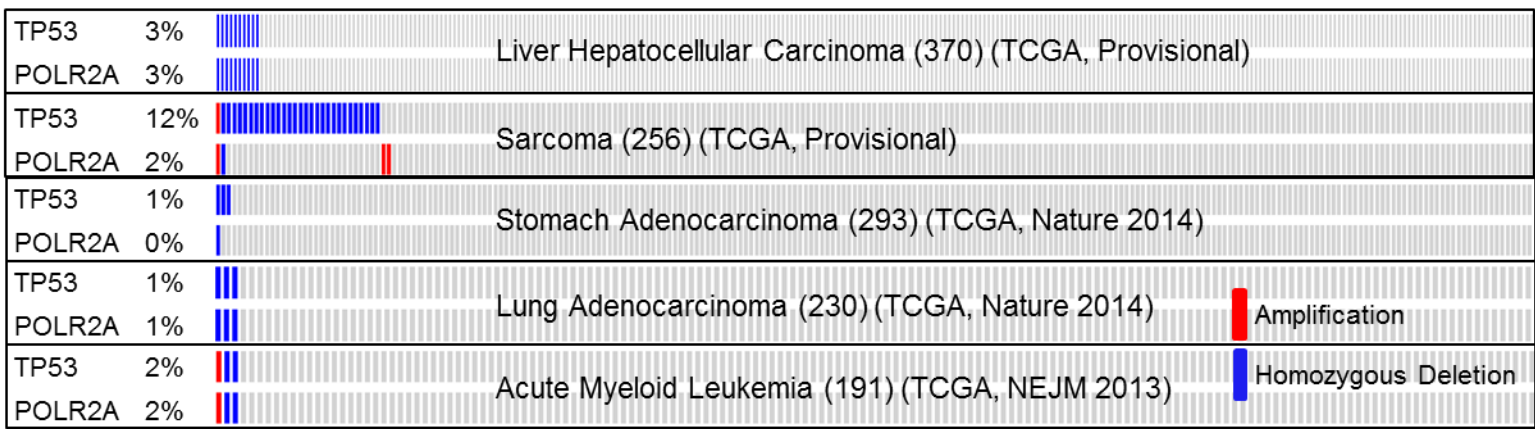

**Figure 1—Figure Supplement 1. Passenger deletion of *FXR2* in *TP53* homozygous deletion cancer.**

(A) *TP53* homozygous deletion frequency in human cancers based on The Cancer Genome Atlas (TCGA) database analysis. Blue bar, homozygous deletion. Red bar, amplification.

(B) *TP53*, *FXR2*, *FXR1*, and *FMR1* copy number alteration in human cancer cell lines based on the Cancer Cell Line Encyclopedia (CCLE) database.

(C) *TP53* and *POLR2A* copy number alteration in human cancers based on TCGA database analysis. Blue bar, homozygous deletion. Red bar, amplification.
