# Supplementary material for: FXR1 regulates transcription and is required for growth of human cancer cells with TP53/FXR2 homozygous deletion
Source: eLife journal article supplement (doi:10.7554/elife.26129), 2017-08-02
Supplement: supp [file elife_poa_e26129_Figure_1_figure_supplement_2.pdf › elife_poa_e26129_Figure_1_figure_supplement_2.pdf]

Fig 1-S2

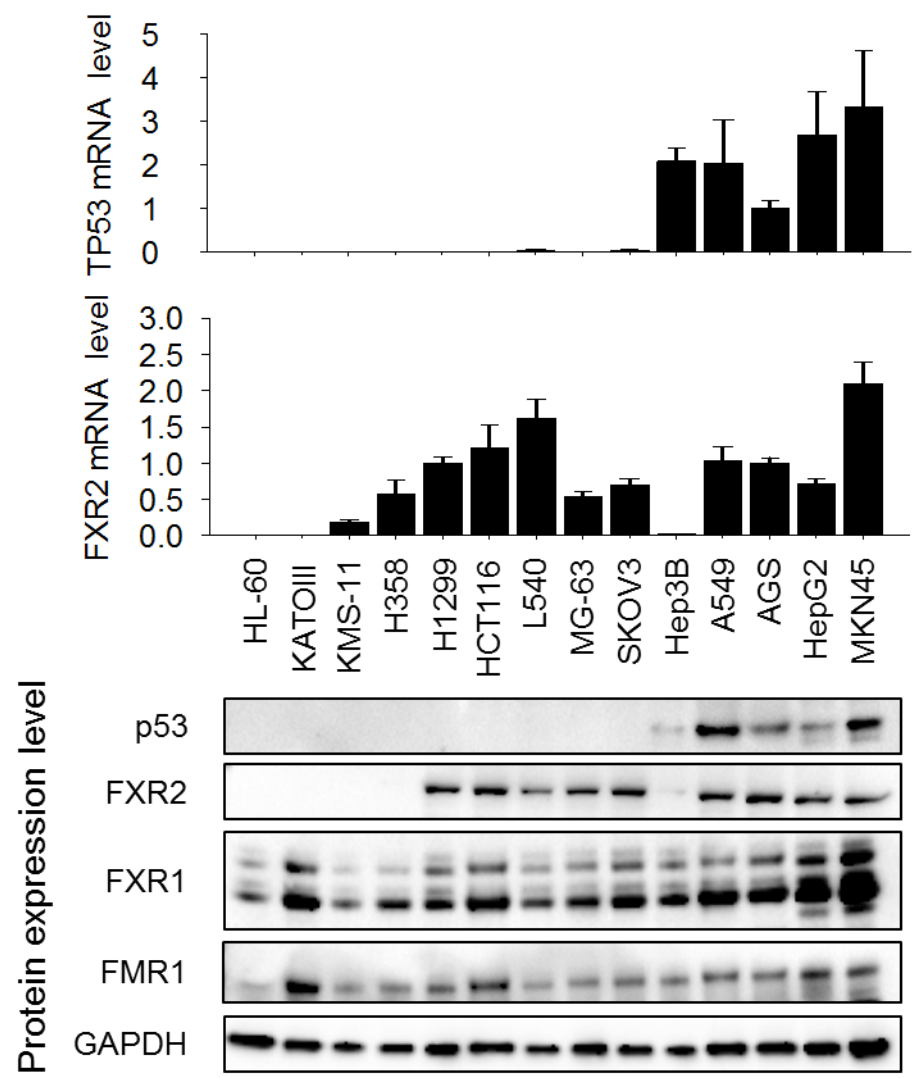

**Figure 1–Figure Supplement 2. Expression of p53, FXR2, FXR1 and FMR1 in human cancer cell lines.** The expression level is detected by q-RT-PCR (a) and Western Blot (WB) assay (b). Doxorubicin (1  $\mu$ M, 24 hrs) is used to trigger p53 protein expression. The mRNA level shown in q-RT-PCR is fold change normalized to GAPDH mRNA level, data represent mean  $\pm$  s.d. of three independent experiments. The mRNA level in AGS cells is set as 1.
