# Supplementary material for: FXR1 regulates transcription and is required for growth of human cancer cells with TP53/FXR2 homozygous deletion
Source: eLife journal article supplement (doi:10.7554/elife.26129), 2017-08-02
Supplement: supp [file elife_poa_e26129_Figure_1_figure_supplement_4.pdf › elife_poa_e26129_Figure_1_figure_supplement_4.pdf]

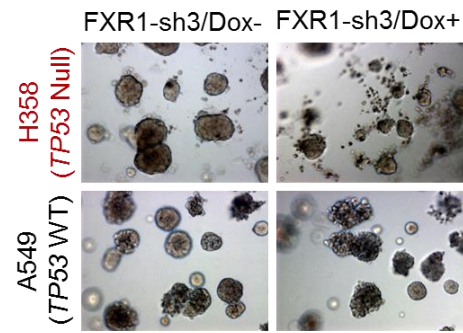

**Figure 1–Figure Supplement 4. FXR1 knockdown inhibits cell growth in Matrigel-based three-dimensional assay.**

H358 (*TP53/FXR2* co-deletion) and A549 (copy number normal) cells stably expressing FXR1-sh3 are seeded on Matrigel for one day followed by Dox treatment for seven days. The organoids image represents one out of three independent experiments.
