# Supplementary material for: FXR1 regulates transcription and is required for growth of human cancer cells with TP53/FXR2 homozygous deletion
Source: eLife journal article supplement (doi:10.7554/elife.26129), 2017-08-02
Supplement: supp [file elife_poa_e26129_Figure_1_figure_supplement_5.pdf › elife_poa_e26129_Figure_1_figure_supplement_5.pdf]

Fig 1-S5

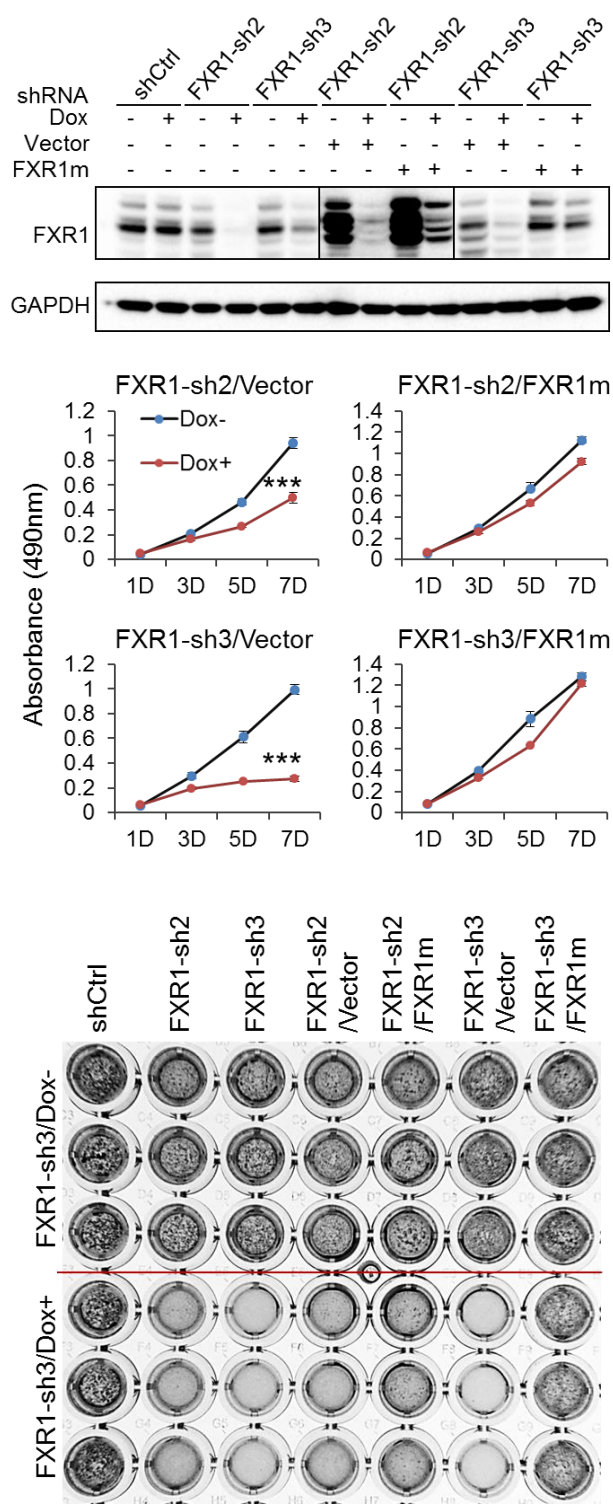

**Figure 1–Figure Supplement 5. Rescuing FXR1 shRNA-induced anti-proliferation by ectopic expression of FXR1.** Upper, ectopic expression of lentiviral shRNA-resistant full length FXR1 (FXR1m\_a) restores Dox-induced knockdown of endogenous FXR1 in HL-60/FXR1-sh2 or HL-60/FXR1-sh3 cells. Middle, ectopic FXR1m rescues FXR1 shRNA-induced anti-proliferation by MTS assay in HL-60/FXR1-sh2 or HL-60/FXR1-sh3 cells. Data represent the mean  $\pm$  s.d. of three independent experiments. Lower, representative cell image in the rescuing study. The cell proliferation rate was determined by measuring absorbance at 490 nm in MTS assay (Y axis). \* $P$ <0.05, \*\* $P$ <0.01, \*\*\* $P$ <0.001.
