# Supplementary material for: FXR1 regulates transcription and is required for growth of human cancer cells with TP53/FXR2 homozygous deletion
Source: eLife journal article supplement (doi:10.7554/elife.26129), 2017-08-02
Supplement: supp [file elife_poa_e26129_Figure_2_figure_supplement_1.pdf › elife_poa_e26129_Figure_2_figure_supplement_1.pdf]

Fig 2-S1 A

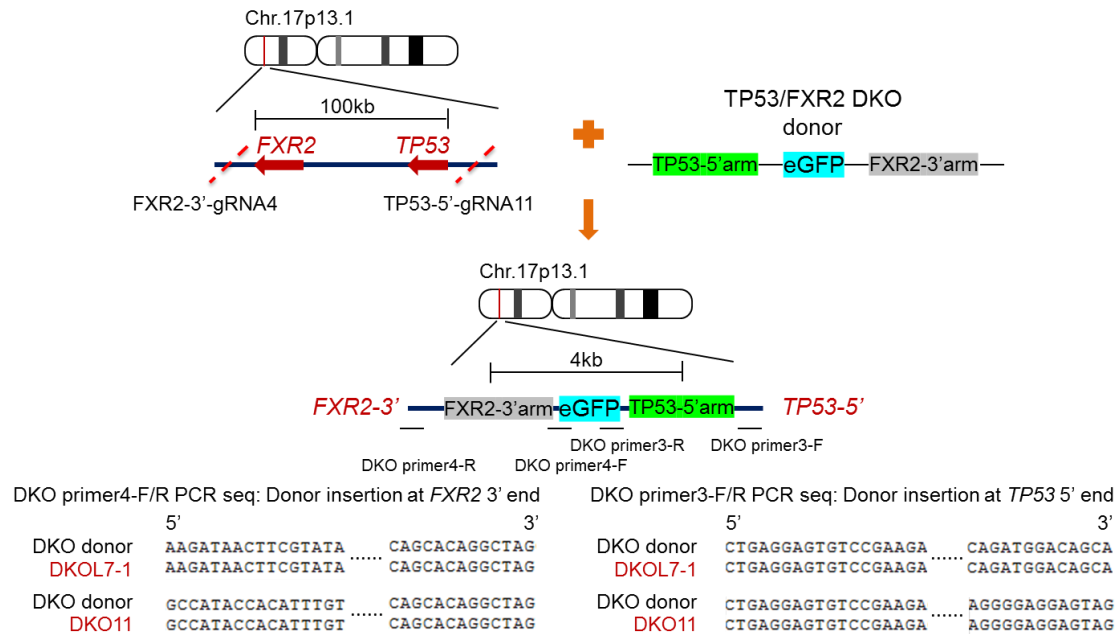

**B**

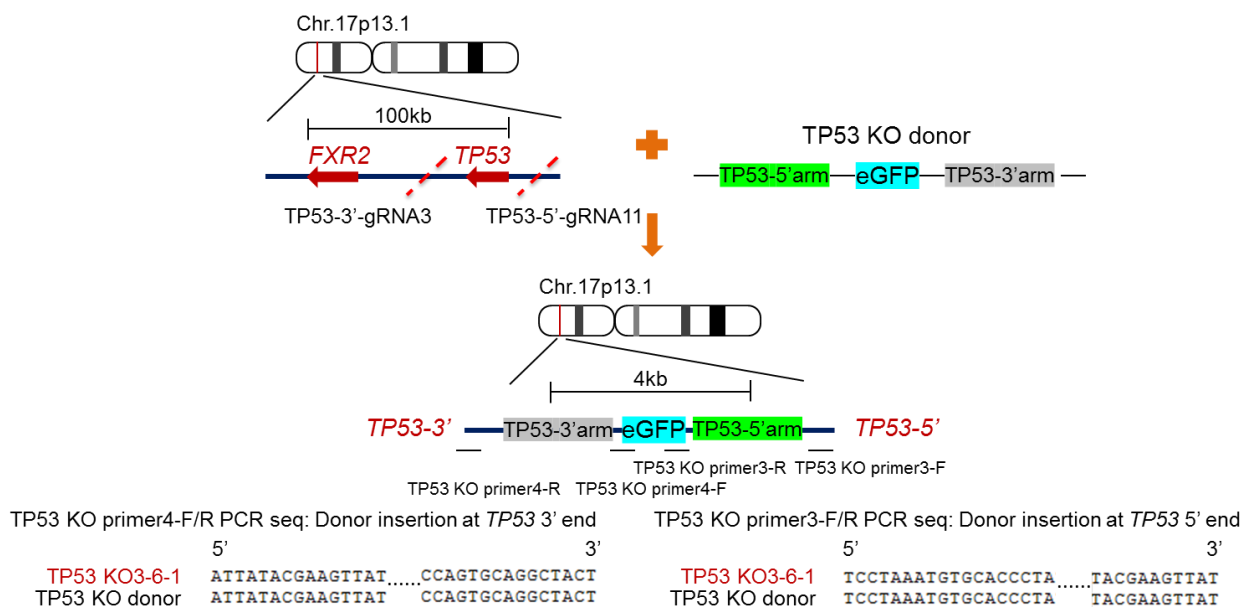

**C**

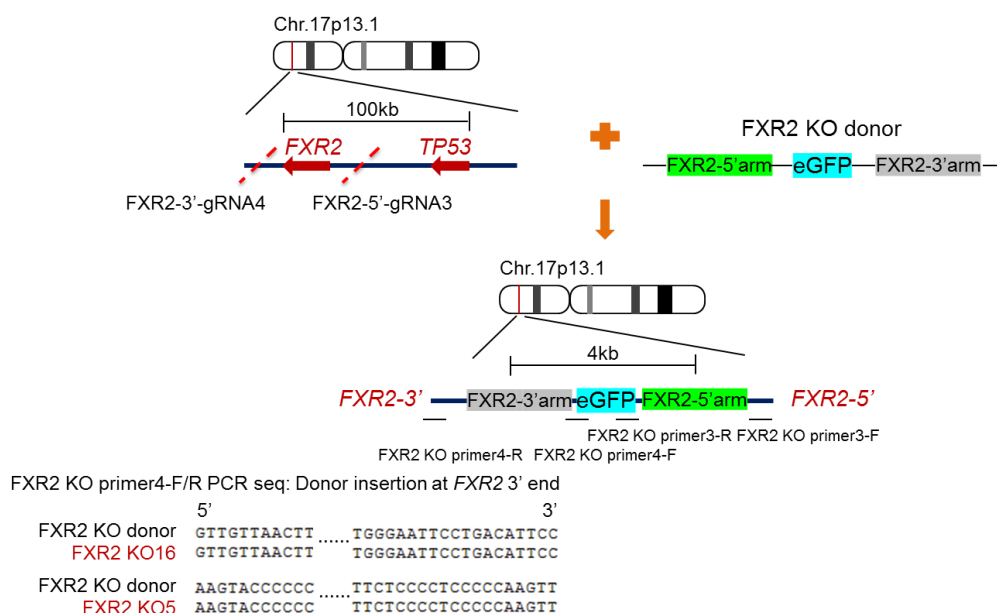

**Figure 2—Figure Supplement 1. CRISPR-Cas9-engineered *TP53*/*FXR2* knockout clones.**

Diagram illustrating the location of *TP53* and *FXR2* at chromosome, gRNA target position, donor plasmid design, and assay flow of knockout generation followed by genomic PCR sequencing showing the proper replacement of the targeted genomic region with donor sequence in *TP53*/*FXR2* double knockout (DKO) clones (A), *TP53* single knockout (KO) clones (B), and *FXR2* single KO clones (C).
