# Supplementary material for: FXR1 regulates transcription and is required for growth of human cancer cells with TP53/FXR2 homozygous deletion
Source: eLife journal article supplement (doi:10.7554/elife.26129), 2017-08-02
Supplement: supp [file elife_poa_e26129_Figure_2_figure_supplement_3.pdf › elife_poa_e26129_Figure_2_figure_supplement_3.pdf]

Fig 2-S3

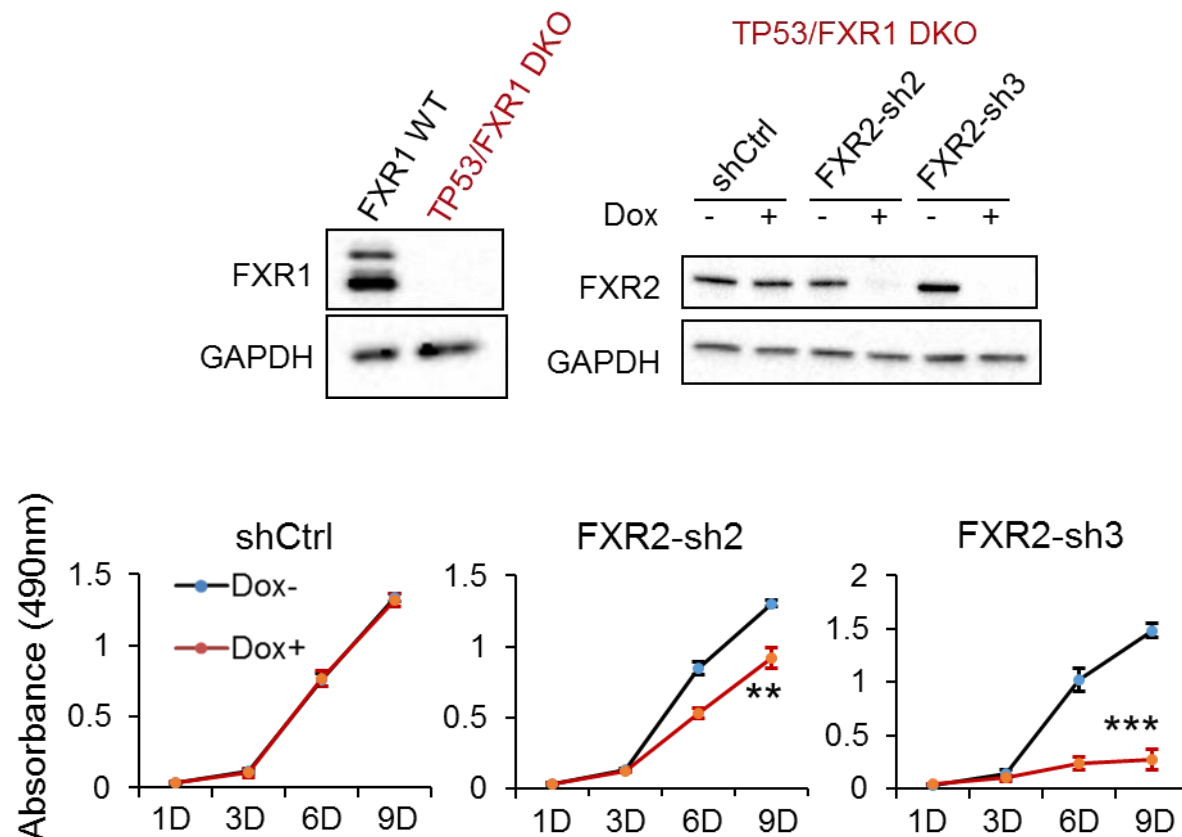

**FXR2 knockdown inhibits cell proliferation in engineered *TP53/FXR1* double knockout cancer cell clones**

Upper left, protein level of FXR1 in the CRISPR-Cas9-engineered *FXR1* copy number normal (WT) and knockout (KO) cell clones generated from *TP53* single knockout (*TP53* KO) clone TP53 KO3-6-1. Upper right, FXR2 protein level upon shCtrl, FXR2-sh2 or FXR2-sh3 treatment. The wild type clones are in black, and the KO clones are in red.

Lower, cell proliferation in the engineered AGS cell clones upon FXR2 knockdown. Data represent the mean  $\pm$  s.d. of three independent experiments. The cell proliferation rate in MTS assay results was shown by the absorbance at 490nm (Y axis). \* $P < 0.05$ , \*\* $P < 0.01$ , \*\*\* $P < 0.001$ .
