# Supplementary material for: FXR1 regulates transcription and is required for growth of human cancer cells with TP53/FXR2 homozygous deletion
Source: eLife journal article supplement (doi:10.7554/elife.26129), 2017-08-02
Supplement: supp [file elife_poa_e26129_Figure_4_figure_supplement_1.pdf › elife_poa_e26129_Figure_4_figure_supplement_1.pdf]

Fig 4-S1

A

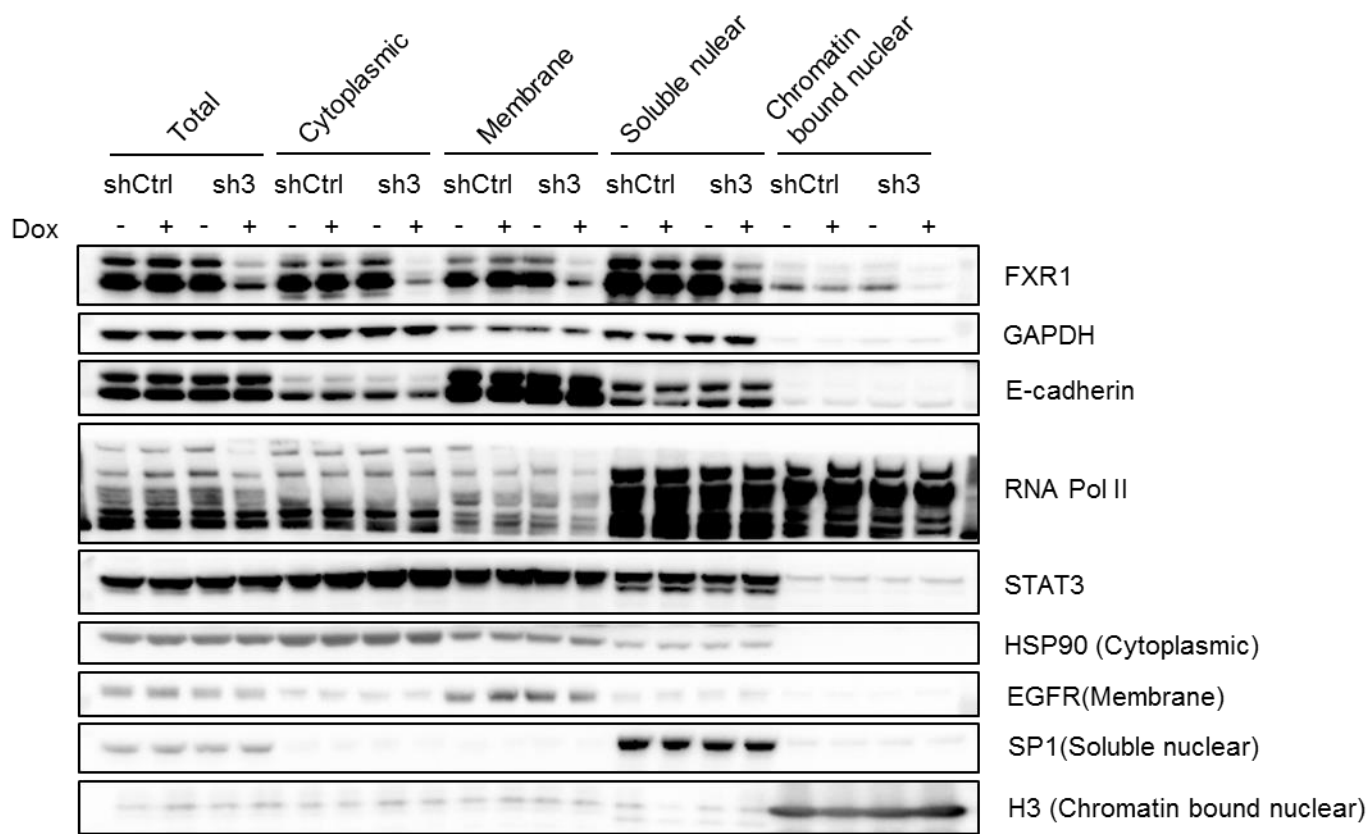

B

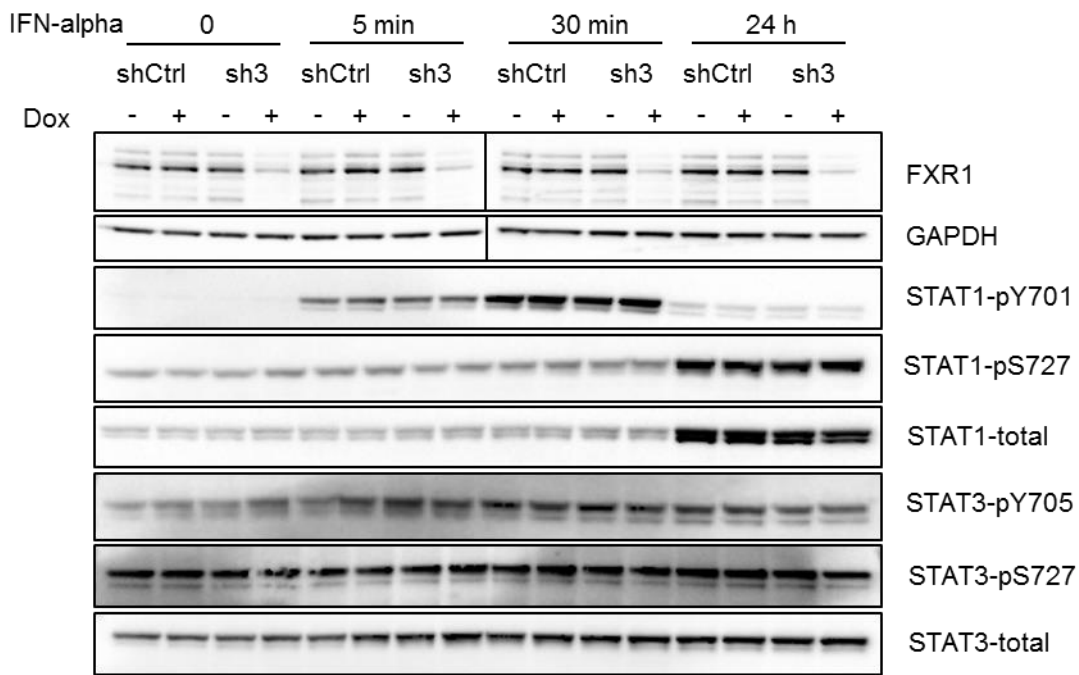

**Figure 4—Figure Supplement 1. FXR1 knockdown doesn't affect the cytoplasm-nucleus shuttling or phosphorylation of STATs.**

(A) H358/FXR1-sh3 (sh3) and H358/control shRNA (shCtrl) cells are treated with Dox for three days. The fraction of cytoplasm, membrane, soluble nucleus, and chromatin-bound nucleus are separated using Subcellular Protein Fractionation Kit for Cultured Cells (Thermo scientific, 78840) and subjected to protein detection in WB assay to determine STAT translocation. HSP90, EGFR, SP1, and histone H3 are used as the markers of the different cellular fraction respectively.

(B) H358/FXR1-sh3 (sh3) and H358/control shRNA (shCtrl) cells are stimulated with IFN-alpha ( $4.25 \times 10^4$  U/ml, Millipore, Cat #IF007) for up to 24 hrs. The cell lysate are subjected to protein detection in WB assay to measure STAT phosphorylation.
