# Supplementary material for: FXR1 regulates transcription and is required for growth of human cancer cells with TP53/FXR2 homozygous deletion
Source: eLife journal article supplement (doi:10.7554/elife.26129), 2017-08-02
Supplement: supp [file elife_poa_e26129_Figure_5_figure_supplement_2.pdf › elife_poa_e26129_Figure_5_figure_supplement_2.pdf]

Fig 5-S2

A

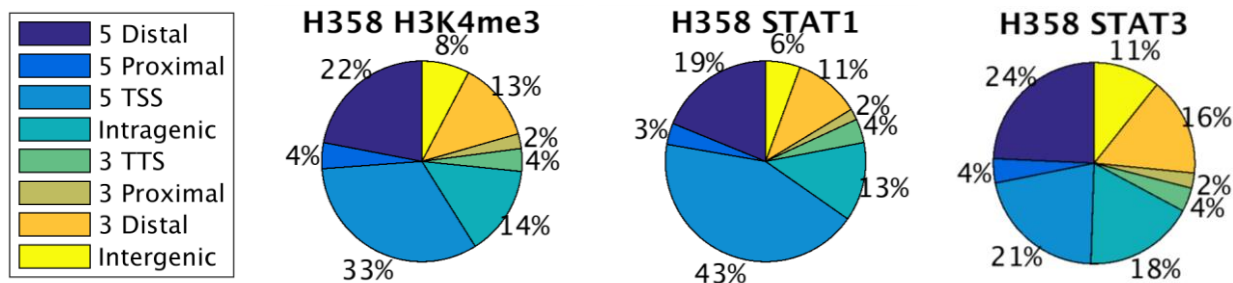

B

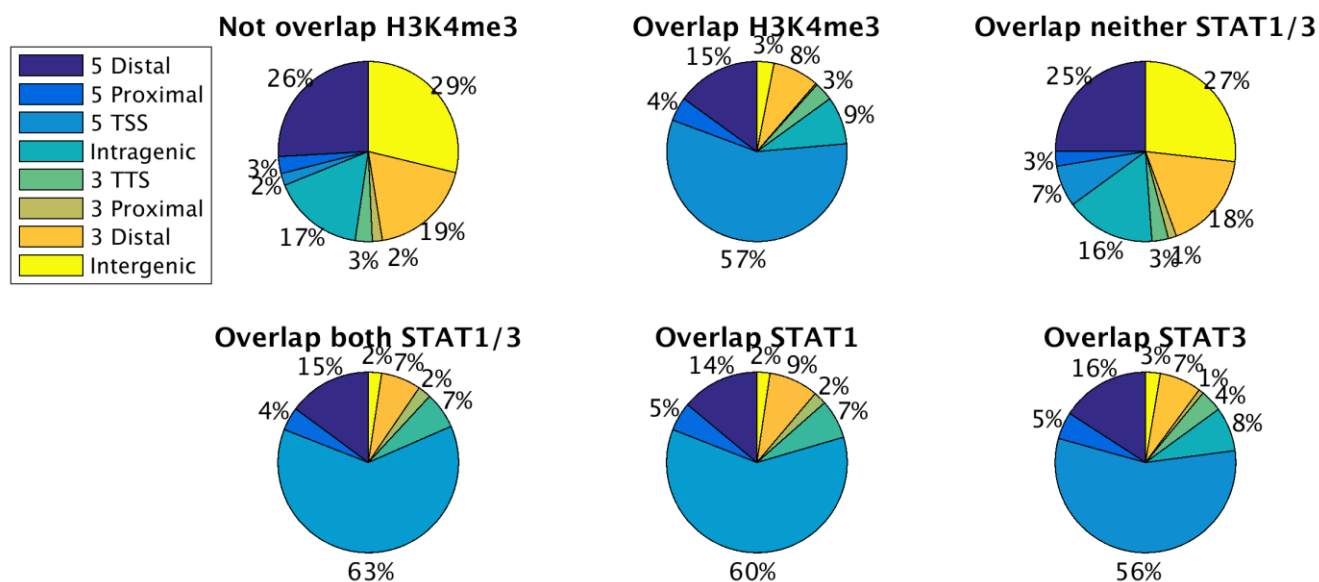

C

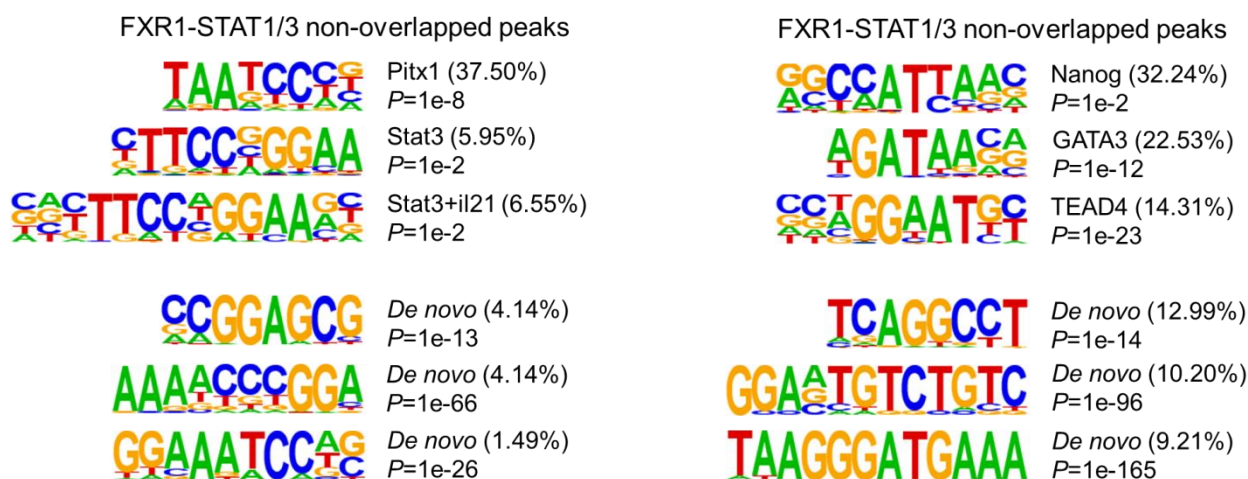

D

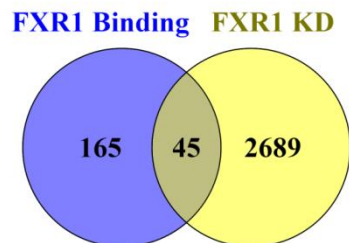

E

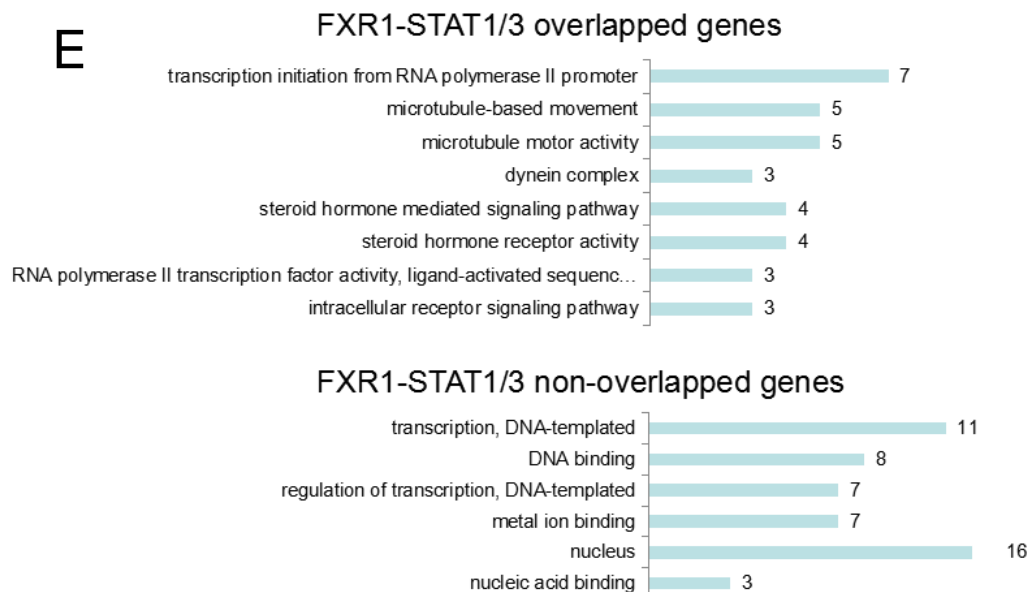

**Figure 5–Figure Supplement 2. FXR1 colocalizes with H3K4me3 and STAT1/3 at gene promoter**

- (A) Genomic distribution of H3K4me3, STAT1 and STAT3 ChIP-seq peaks in H358 cells.
  - (B) Genomic distribution of FXR1-H3K4me3 or FXR1-STAT1/3 overlapped or non-overlapped ChIP-seq peaks in H358 cells.
  - (C) Representative binding motifs of FXR1 from motif analysis of FXR1 and STAT1/3 overlapped regions (left) or non-overlapped regions (right) using MEME.
  - (D) Venn diagrams showing significant overlap between FXR1 regulated genes from RNA-seq result and genes with FXR1 occupancy at promoter from ChIP-seq result in H358 cells ( $P<1\times e-5$ ). KD, knockdown.
  - (E) GO analysis of overlapped or non-overlapped genes of FXR1 with STAT1/3.
- TSS, transcription start site; TTS, transcription termination site.
- Also see Supplementary Table S6 and S7.
