# Supplementary material for: FXR1 regulates transcription and is required for growth of human cancer cells with TP53/FXR2 homozygous deletion
Source: eLife journal article supplement (doi:10.7554/elife.26129), 2017-08-02
Supplement: supp [file elife_poa_e26129_Figure_5_figure_supplement_3.pdf › elife_poa_e26129_Figure_5_figure_supplement_3.pdf]

Fig 5 S3

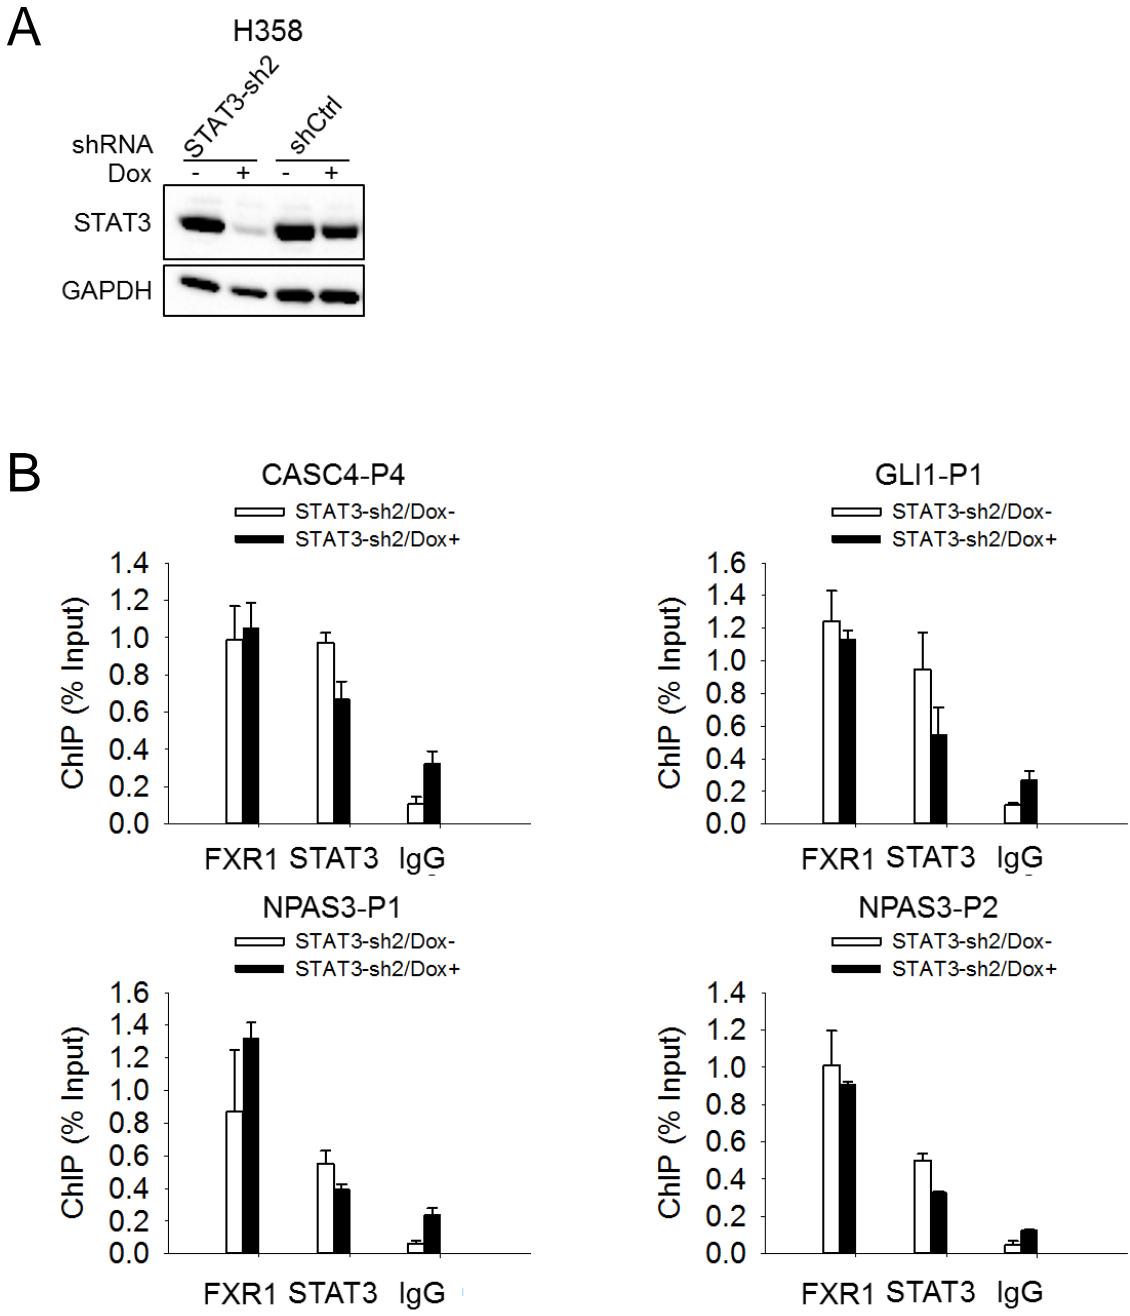

**Figure 5–Figure Supplement 3. FXR1 localization at gene promoter is not affected by STAT3.**

(A) siRNA-mediated STAT3 expression silence in H358 cells.

(B) The FXR1 or STAT3 ChIP complexes from STAT3 siRNA-treated H358 cells are subjected to PCR using the promoter-specific primers to detect FXR1 or STAT3 enrichment at promoter of the target genes. IgG pull down is used as a negative control. Data represent mean  $\pm$  s.d. from three independent experiments.
