# Supplementary material for: FXR1 regulates transcription and is required for growth of human cancer cells with TP53/FXR2 homozygous deletion
Source: eLife journal article supplement (doi:10.7554/elife.26129), 2017-08-02
Supplement: supp [file elife_poa_e26129_Figure_5_figure_supplement_5.pdf › elife_poa_e26129_Figure_5_figure_supplement_5.pdf]

Fig 5-S5

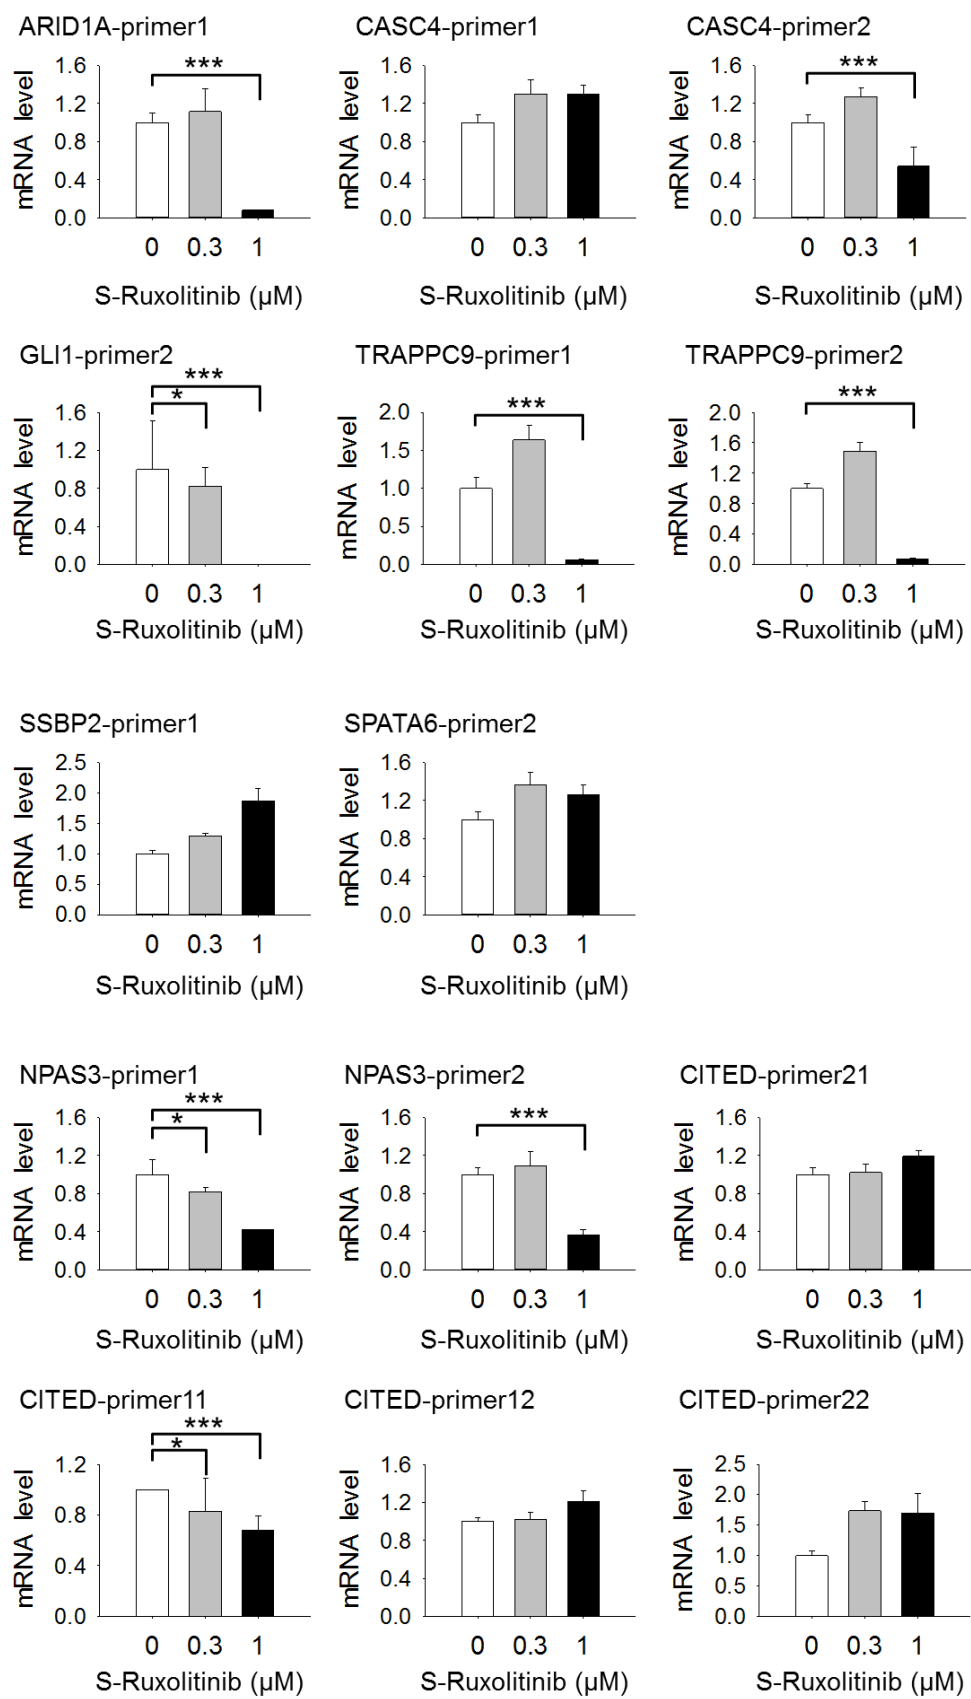

**Figure 5–Figure Supplement 5. Regulation of target gene expression by JAK inhibitor.**  
The *TP53/FXR2* co-deletion cancer cell line H358 is treated with JAK inhibitor (JAKi) S-Ruxolitinib at the dosage of 0, 0.3, or 1 μM for 4 days. The total mRNA is extracted and subjected for q-RT-PCR assay to determine the expression of FXR1 target genes. Data represent mean ± s.d. from three independent experiments. The mRNA level shown in q-RT-PCR is fold change normalized to GAPDH mRNA level. The mRNA level at 0 μM S-Ruxolitinib treatment is set as 1. \* $P < 0.05$ , \*\*\* $P < 0.001$  (comparing to the 0 μM S-Ruxolitinib treatment sample).
