# Supplementary material for: FXR1 regulates transcription and is required for growth of human cancer cells with TP53/FXR2 homozygous deletion
Source: eLife journal article supplement (doi:10.7554/elife.26129), 2017-08-02
Supplement: supp [file elife_poa_e26129_Figure_5_figure_supplement_6.pdf › elife_poa_e26129_Figure_5_figure_supplement_6.pdf]

Fig 5-S6

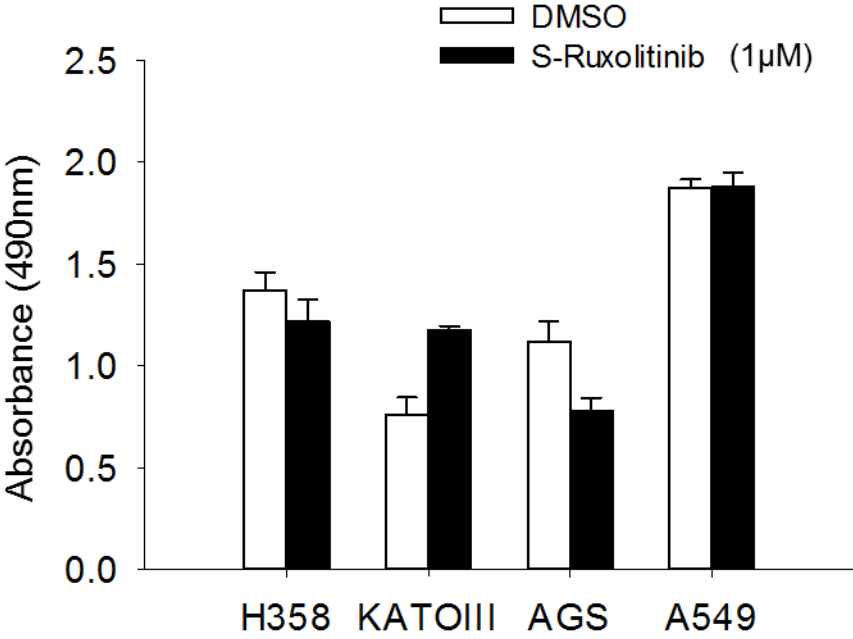

**Figure 5–Figure Supplement 6. Cell proliferation regulation by JAK inhibitor.**  
The *TP53/FXR2* co-deletion cancer cell lines (H358, KATOIII) and wild type cancer lines (AGS, A549) are treated with JAKi S-Ruxolitinib at 1 μM for 5 days. Cell proliferation rate is determined by MTS assay. The cell proliferation rate in MTS was determined by measuring absorbance at 490nm (Y axis). Data represent mean ± s.d. from three independent experiments.
