# Supplementary material for: FXR1 regulates transcription and is required for growth of human cancer cells with TP53/FXR2 homozygous deletion
Source: eLife journal article supplement (doi:10.7554/elife.26129), 2017-08-02
Supplement: supp [file elife_poa_e26129_Figure_6_figure_supplement_1.pdf › elife_poa_e26129_Figure_6_figure_supplement_1.pdf]

Fig 6-S1

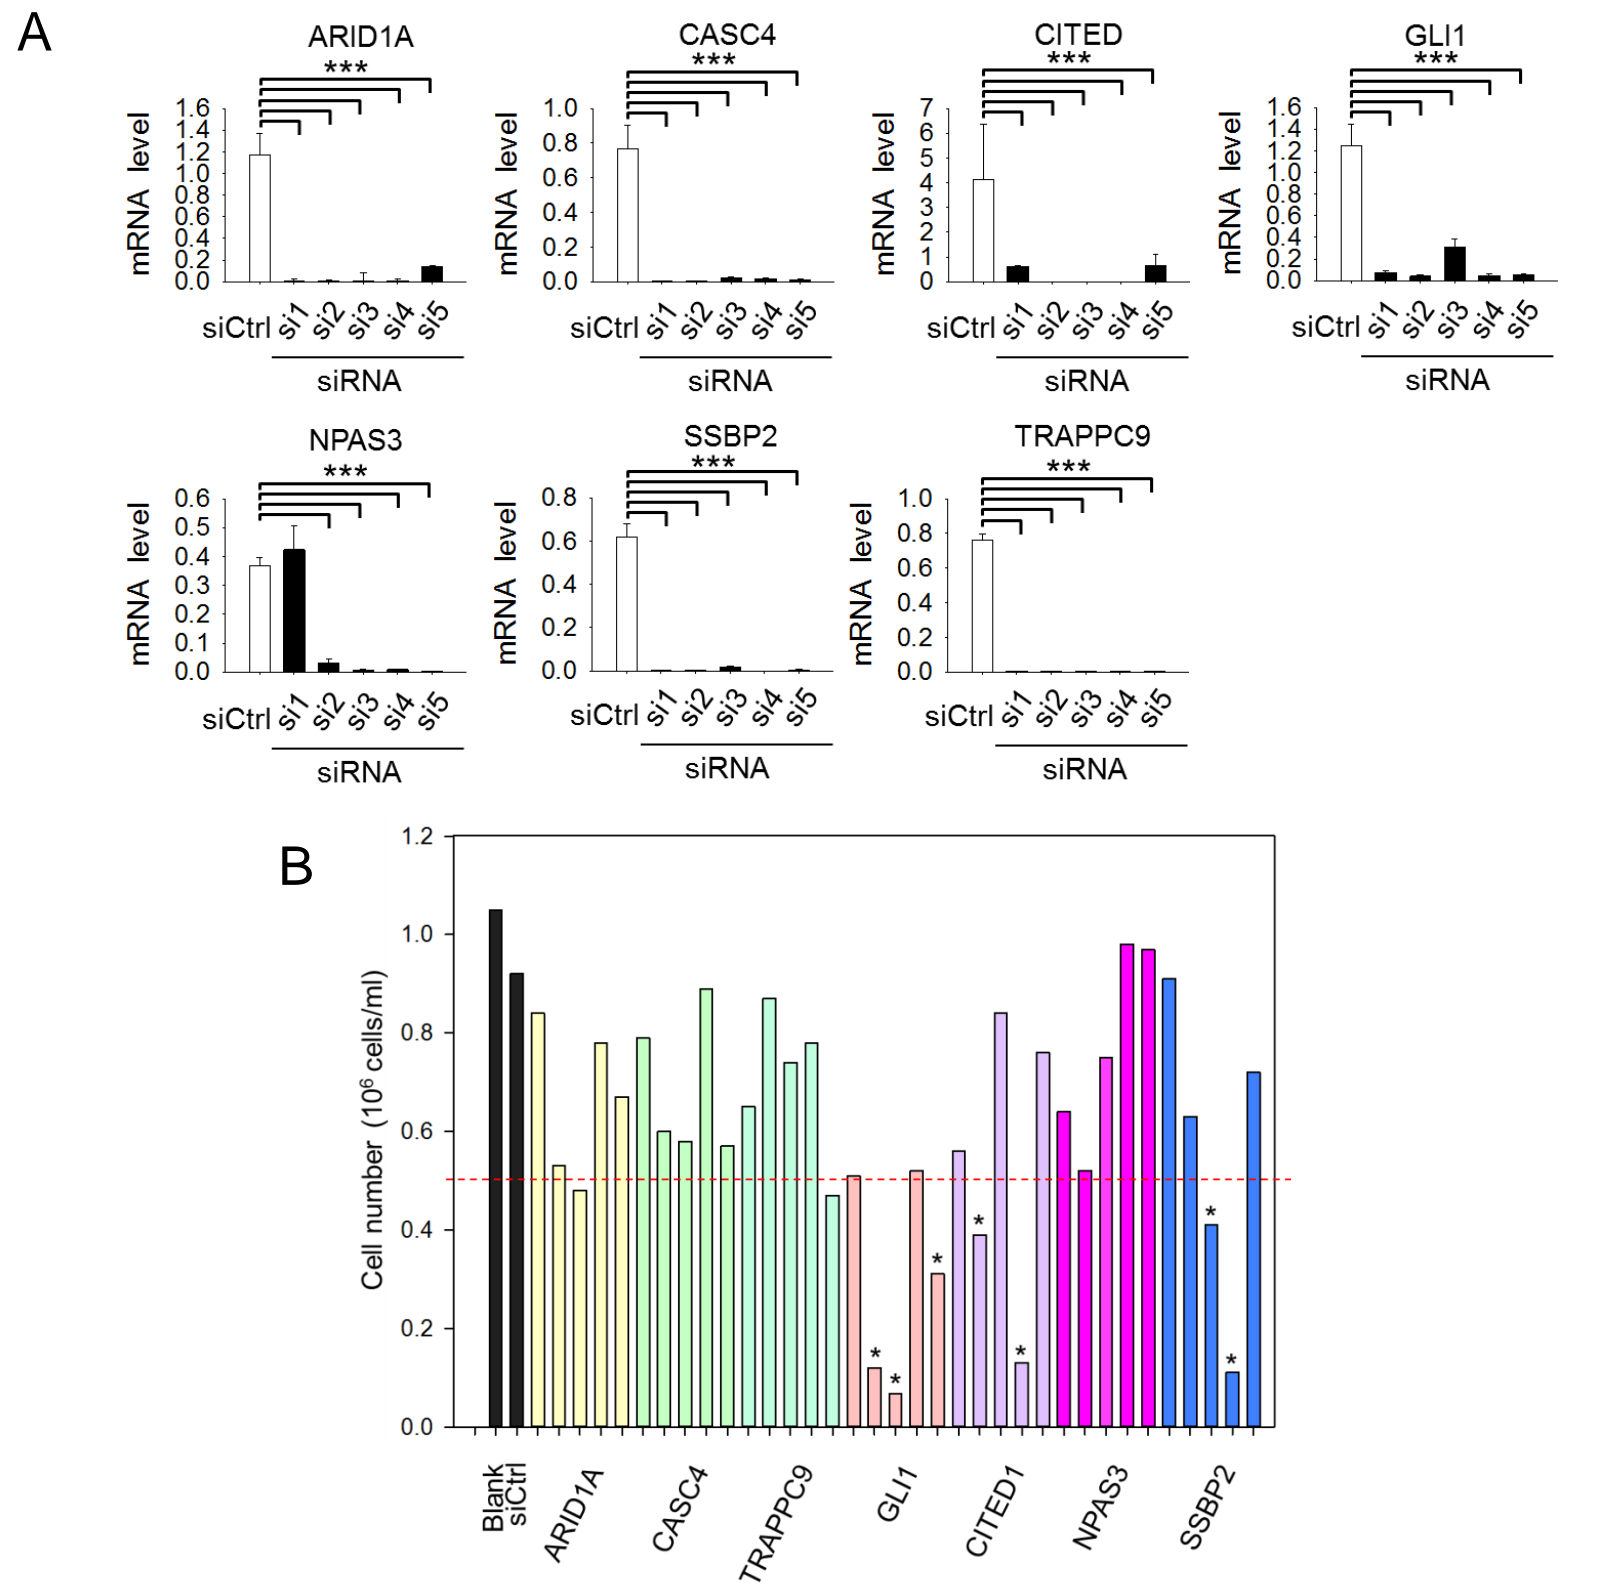

**Figure 6–Figure Supplement 1. FXR1 target genes siRNA knockdown.**  
(A) siRNA-mediated downregulation of the target genes in H358 cells detected by q-RT-PCR. Five siRNAs for each gene (si1-5) are tested for knockdown efficiency at concentration 20 nM. The mRNA level shown in q-RT-PCR is fold change normalized to GAPDH mRNA level. Data represent mean  $\pm$  s.d. of three independent experiments. \*\*\* $P$ <0.001 (comparing to the control siRNA treatment sample).  
(B) Effect of siRNA-mediated downregulation of the FXR1 target genes on H358 cell proliferation by counting the cell number. Five siRNAs for each gene (si1-5) are tested at concentration 20 nM. \* indicates the siRNAs which caused significant cell proliferation change.
