# Supplementary material for: FXR1 regulates transcription and is required for growth of human cancer cells with TP53/FXR2 homozygous deletion
Source: eLife journal article supplement (doi:10.7554/elife.26129), 2017-08-02
Supplement: supp [file elife_poa_e26129_Figure_6_figure_supplement_2.pdf › elife_poa_e26129_Figure_6_figure_supplement_2.pdf]

Fig 6-S2

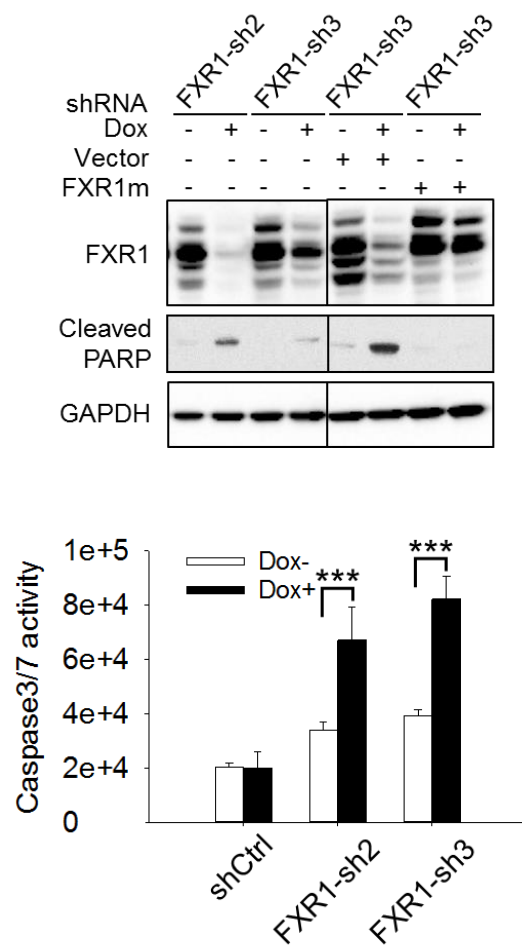

**Figure 6—Figure Supplement 2. Cell apoptosis induced by FXR1 knockdown in HL-60 cells.**

Upper, cleaved PARP is measured by WB in HL-60/FXR1-sh2 and HL-60/FXR1-sh3 cells upon Dox-induced FXR1 knockdown. Data represent one time study out of three independent experiments. Lower, caspase-3/7 activity is measured by Caspase-Glo3/7 Assay in HL-60/FXR1-sh2 and HL-60/FXR1-sh3 cells. Data represent mean ± s.d. of three independent experiments. \*\*\**P*<0.001 (FXR1-shRNA/Dox+ sample comparing to FXR1-shRNA/Dox- sample).
