# Supplementary material for: FXR1 regulates transcription and is required for growth of human cancer cells with TP53/FXR2 homozygous deletion
Source: eLife journal article supplement (doi:10.7554/elife.26129), 2017-08-02
Supplement: supp [file elife_poa_e26129_Figure_6_figure_supplement_3.pdf › elife_poa_e26129_Figure_6_figure_supplement_3.pdf]

Fig 6-S3

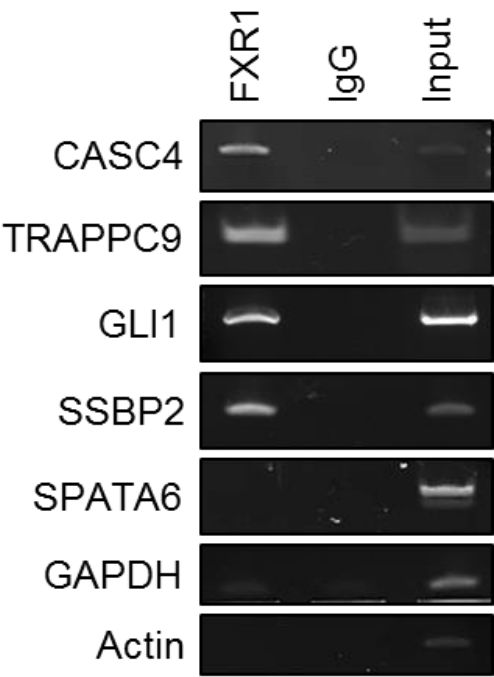

**Figure 6–Figure Supplement 3. FXR1 binding to the target genes mRNA.**  
Immunoprecipitation (IP) complex by FXR1 antibody or IgG pull down from H358 cells are subjected to RT-PCR using the target gene specific primers (listed in Supplementary Information) to detect the precipitated mRNAs. The PCR products are detected by electrophoresis in agarose gels and stained with ethidium bromide, visualized by ChemiDoc. The non-target genes *GAPDH*, *Actin*, and *SPATA6* serve as the negative controls.
