# Supplementary figures and images for: FXR1 regulates transcription and is required for growth of human cancer cells with TP53/FXR2 homozygous deletion
Source: eLife journal article supplement (doi:10.7554/elife.26129), 2017-08-02

Fig 1-S3

A

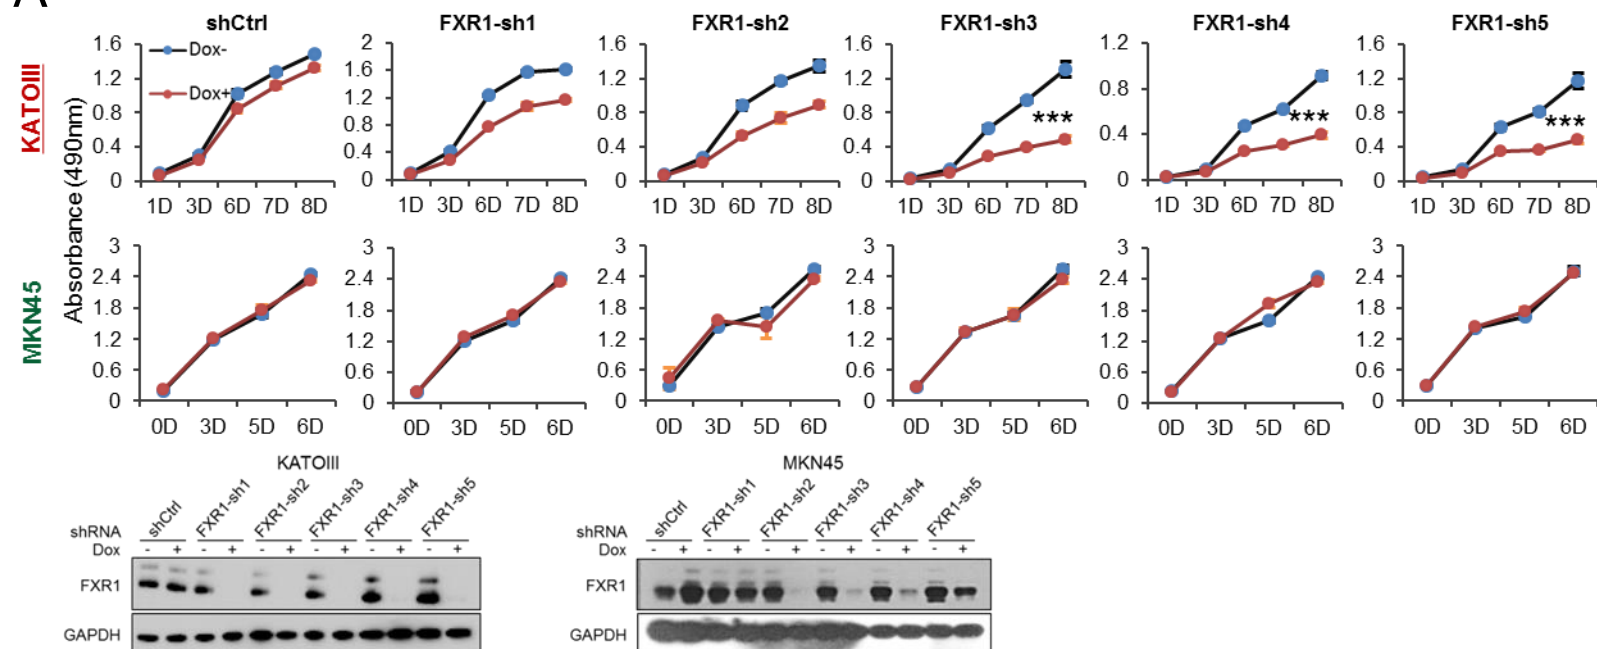

B

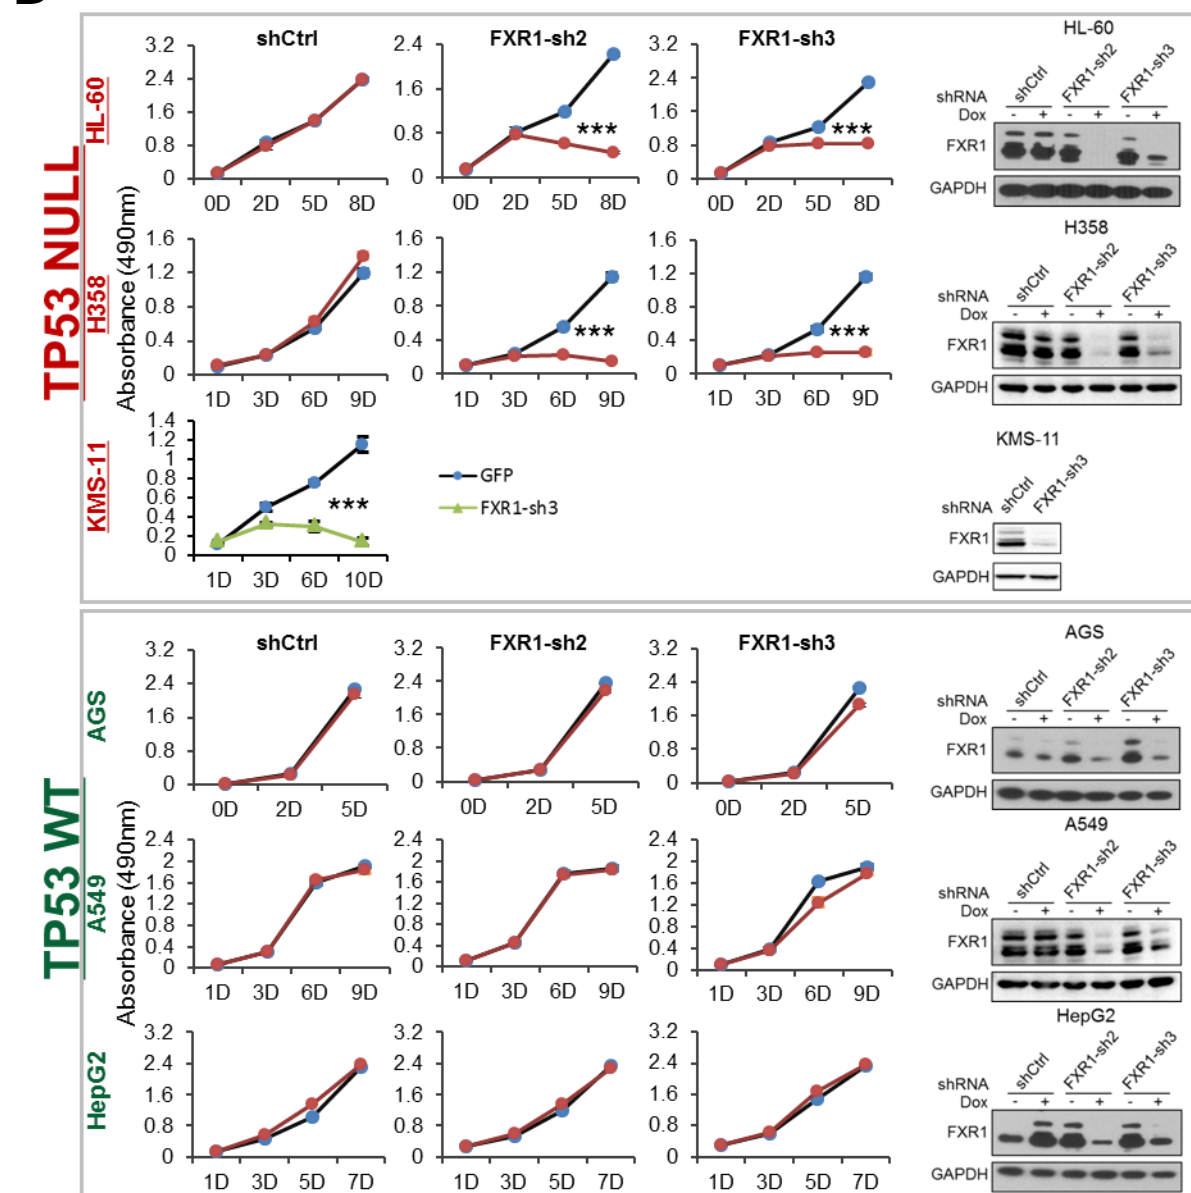

C

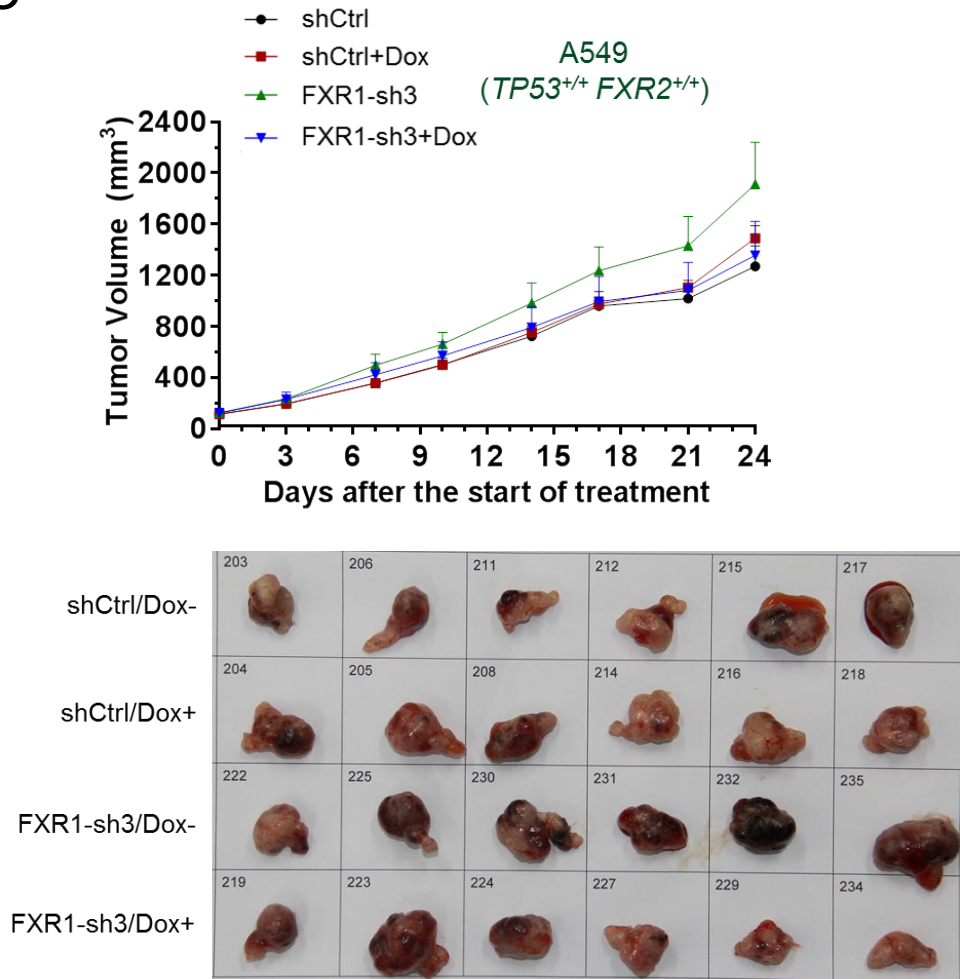

Supplement: supp [file elife_poa_e26129_Figure_1_figure_supplement_3.pdf › elife_poa_e26129_Figure_1_figure_supplement_3.pdf]
